# Supplementary material for: The neuropeptide complement of the marine annelid Platynereis dumerilii
Source: PubMed Central journal article supplement (PMC3890597; doi:10.1186/1471-2164-14-906), 2013-12-20

**Additional file 9: Obtained MS-evidences for *Platynereis* pNPs.**

For each MS-hit, peptide sequence, spectral ID (ID), mass, posterior error probabilities (PEP) and number of total evidences (ev) are given. Modifications are indicated as follows: oxidation (\*), amidation (am), pyro-glumatic acid (gl).

For each hit, spectra are provided following the ID numbering in the table.

| precursor                                                                | peptide sequence          | ID | mass     | PEP      | ev |
|--------------------------------------------------------------------------|---------------------------|----|----------|----------|----|
| <b><i>Platynereis</i> pNPs belonging to ancient eumetazonan families</b> |                           |    |          |          |    |
| FMRFamide                                                                | SDGNLGP MYFAIRH           | 1  | 1576.746 | 8.07E-03 | 1  |
| FMRFamide                                                                | SDGNLGP MYFAIRH           | 2  | 1592.741 | 6.70E-06 | 3  |
| FMRFamide                                                                | SFDPSLYLQMRQam            | 3  | 1482.729 | 2.78E-09 | 2  |
| FMRFamide                                                                | SFDPSLYLQMRQam            | 4  | 1498.724 | 2.99E-04 | 2  |
| FMRFamide                                                                | SVHLASDPSQAYLASFGNVD      | 5  | 2076.975 | 1.13E-06 | 2  |
| FMRFamide                                                                | SDPEEELHE                 | 6  | 1083.436 | 8.58E-03 | 1  |
| FMRFamide                                                                | DGENGFMR*RFam             | 7  | 1086.455 | 8.02E-03 | 1  |
| RYamide                                                                  | GTLLRYam                  | 8  | 720.428  | 9.72E-03 | 1  |
| RYamide                                                                  | NSVDLDDLIEEA              | 9  | 1331.609 | 1.59E-03 | 1  |
| RYamide                                                                  | DIRAPQAPHVPRFGEE          | 10 | 1964.986 | 1.21E-04 | 4  |
| RYamide                                                                  | APQAPHVPRFGEE             | 11 | 1580.774 | 1.43E-04 | 1  |
| YFamide                                                                  | YFGKMPVGSLYKGD            | 12 | 1560.765 | 9.28E-03 | 1  |
| MIP/allatostatin-B                                                       | LHLDDVEPILDDEES           | 13 | 1737.795 | 1.40E-06 | 2  |
| WI                                                                       | NVHDYELYND DD             | 14 | 1510.585 | 6.09E-04 | 1  |
| WI                                                                       | NSMSDDSSRDWL              | 15 | 1411.567 | 4.14E-04 | 2  |
| WI                                                                       | NSM*SDDSSRDWL             | 16 | 1427.562 | 6.35E-04 | 1  |
| WI                                                                       | DGLADEDEDQM*VEVENPYEHV    | 17 | 2447.991 | 7.15E-07 | 3  |
| WI                                                                       | DVSSAGPEHEAQOVVAGEAEQGHVD | 18 | 2545.132 | 3.59E-13 | 1  |
| WI                                                                       | DAEQSNLVSQQQPAEKESTGH     | 19 | 2282.041 | 7.10E-07 | 4  |
| <b><i>Platynereis</i> pNPs belonging to ancient bilaterian families</b>  |                           |    |          |          |    |
| NPY-4                                                                    | TIAEWYEGM*DH              | 20 | 1366.550 | 5.73E-03 | 1  |
| RGWamide                                                                 | GALDPELESEAD              | 21 | 1244.541 | 8.74E-03 | 1  |
| RGWamide                                                                 | LTIDALEDGIDK              | 22 | 1301.672 | 1.18E-11 | 2  |
| GnRH/AKH-1                                                               | (gl)QFSFSLPGKWGNam        | 23 | 1348.656 | 7.22E-05 | 2  |
| proenkephalin                                                            | YGNLLGGLFSNSNYGKD         | 24 | 1817.858 | 3.47E-04 | 2  |
| proenkephalin                                                            | YGD LFSNSNYGKD            | 25 | 1478.631 | 9.30E-05 | 3  |
| proenkephalin                                                            | YGGLFSNSHYGKD             | 26 | 1443.642 | 1.89E-03 | 1  |
| proenkephalin                                                            | YGGSLFGRLFSNKam           | 27 | 1443.762 | 1.81E-08 | 1  |
| proenkephalin                                                            | YGNLLGHVFGRSVDD           | 28 | 1647.801 | 3.59E-04 | 1  |
| proenkephalin                                                            | YGSLFTPMFGGKDK            | 29 | 1546.749 | 5.80E-04 | 1  |
| Proenkephalin                                                            | YGSLFTPM*FDGKDK           | 30 | 1620.749 | 5.15E-03 | 1  |
| proenkephalin                                                            | YGSLFTPM*FGGKD            | 31 | 1434.649 | 1.11E-04 | 3  |
| proenkephalin                                                            | YGSLFTPMFGGKD             | 32 | 1418.654 | 1.11E-03 | 1  |

|                    |                                     |    |          |           |   |
|--------------------|-------------------------------------|----|----------|-----------|---|
| proenkephalin      | YGSLFTPMFGQKam                      | 33 | 1373.680 | 3.62E-09  | 1 |
| proenkephalin      | YGSLFTPM*FGQKam                     | 34 | 1389.675 | 8.36E-05  | 4 |
| proenkephalin      | YGGLLAQM*YGRSEPTSD                  | 35 | 1859.836 | 8.79E-03  | 1 |
| DH44-2             | LNDDSAEFESSEGLH                     | 36 | 1648.685 | 6.49E-29  | 1 |
| DH44-2             | APLSINAELHSLAHSFNGDGEGRARLL<br>NLam | 37 | 3070.606 | 3.15E-10  | 2 |
| tachykinin-1       | SDDNLIEEEDRVDTYPF                   | 38 | 2055.891 | 5.33E-10  | 2 |
| tachykinin-1       | (gl)QPPKGFHAVRam                    | 39 | 1117.615 | 6.90E-04  | 1 |
| tachykinin-1/2     | MDSNQFFHMRam                        | 40 | 1310.565 | 2.95E-12  | 1 |
| pedal-peptide-1    | AFDSIGHHSFAFGGL                     | 41 | 1414.663 | 2.18E-16  | 2 |
| pedal-peptide-1    | SFDSIGHSSNFAGLD                     | 42 | 1552.679 | 5.48E-10  | 3 |
| pedal-peptide-1    | SFDSIGHSSNFAGL                      | 43 | 1437.653 | 3.13E-04  | 3 |
| pedal-peptide-1    | PFDSIGHSSSFAGL                      | 44 | 1420.662 | 3.87E-07  | 2 |
| pedal-peptide-1    | AFDSIGHHSFAFSGL                     | 45 | 1444.674 | 1.76E-14  | 3 |
| pedal-peptide-1    | AFDSIGHSSNFAGLD                     | 46 | 1536.685 | 4.86E-10  | 2 |
| pedal-peptide-1    | SFNSIGHASNFAGL                      | 47 | 1420.674 | 8.31E-07  | 1 |
| pedal-peptide-2    | MSPQEDYLM*KSQGO                     | 48 | 1656.712 | 2.91E-03  | 1 |
| pedal-peptide-2    | M*SPOEDYLM*KSQGO                    | 49 | 1672.707 | 4.21E-07  | 3 |
| pedal-peptide-2    | M*LDEVGSSLL                         | 50 | 1078.522 | 4.07E-36  | 1 |
| pedal-peptide-2    | YLDRLGSSLI                          | 51 | 1135.624 | 1.25E-06  | 4 |
| pedal-peptide-2    | DAEEM*MEEGDRVAYAANNPK               | 52 | 2254.947 | 2.86E-12  | 2 |
| pedal-peptide-2    | DAEEM*M*EEGDRVAYAANNPK              | 53 | 2270.942 | 4.87E-07  | 1 |
| pedal-peptide-rel. | FTMNGNGHEGNYEE                      | 54 | 1597.610 | 6.06E-03  | 1 |
| sCAP               | LPPDFFRNam                          | 55 | 1003.524 | 7.76E-126 | 2 |
| sulfakinin         | QQGAWDM*DYGWGGGRFam                 | 56 | 1844.769 | 2.57E-04  | 1 |
| sulfakinin         | (gl)QQGAWDM*DYGWGGGRFam             | 57 | 1827.742 | 5.76E-04  | 2 |
| sulfakinin         | YDMYGIGGRFam                        | 58 | 1176.539 | 5.79E-03  | 1 |
| sulfakinin         | YDMYGIGGRF                          | 59 | 1177.523 | 1.43E-21  | 1 |
| sulfakinin         | YDM*YGIGGRFam                       | 60 | 1192.534 | 3.68E-03  | 1 |
| sulfakinin         | YDM*YGIGGRF                         | 61 | 1193.518 | 1.27E-32  | 2 |
| allatostatin-A-1   | DDNIFRFSELaM                        | 62 | 1253.604 | 3.72E-04  | 1 |
| allatostatin-A-1   | VNNALKFSGLaM                        | 63 | 1060.603 | 6.17E-03  | 1 |
| allatostatin-A-2/3 | ANNALKFSGLaM                        | 64 | 1032.572 | 9.88E-03  | 1 |
| allatostatin-A-3   | GNDALKFSGLaM                        | 65 | 1019.540 | 5.00E-05  | 2 |
| allatostatin-C     | EDIEREMTDV                          | 66 | 1235.534 | 1.00E-12  | 1 |
| SIFamide-1         | ASHPNM*NNLLFam                      | 67 | 1271.608 | 1.20E-03  | 2 |
| L11                | SESEEFVLDPR                         | 68 | 1306.604 | 5.58E-06  | 2 |
| L11                | (gl)QADQASSYDLGLAAKLWPHI            | 69 | 2166.075 | 1.33E-04  | 1 |
| leucokinin         | ISELVEEKE                           | 70 | 1074.545 | 9.87E-17  | 3 |
| leucokinin         | SHALDDIEED                          | 71 | 1142.473 | 1.13E-03  | 1 |
| leucokinin         | SIGGLTEEDLKAVLHGLT                  | 72 | 1851.994 | 5.94E-05  | 1 |

### **Platynereis pNPs belonging to ancient protostome families**

|            |                           |    |          |          |   |
|------------|---------------------------|----|----------|----------|---|
| myomodulin | (gl)QLFDVPRM*GKDLVDIM*EPS | 73 | 2204.049 | 7.35E-03 | 1 |
| myomodulin | M*VADEATSFDELPR           | 74 | 1595.714 | 5.09E-11 | 2 |
| myomodulin | SAEEVANEVEGSHKE           | 75 | 1613.717 | 6.21E-11 | 2 |
| myomodulin | SAEEVANEVEGSH             | 76 | 1356.579 | 4.57E-09 | 3 |
| myomodulin | AMSMLRM*am                | 77 | 853.397  | 1.67E-07 | 1 |
| myomodulin | AMGM*LRMam                | 78 | 823.387  | 7.62E-03 | 1 |
| myomodulin | EEEIEPEVDE                | 79 | 1216.498 | 9.48E-03 | 1 |

### **Lophotrochozoan specific pNPs**

|               |                     |    |          |          |   |
|---------------|---------------------|----|----------|----------|---|
| FVamide/EFLGa | FAVEPAEETRDLEEGEE   | 80 | 1948.854 | 3.27E-10 | 4 |
| FVamide/EFLGa | FAVEPAEET           | 81 | 991.450  | 3.99E-03 | 1 |
| FVamide/EFLGa | SAEVRQPADASVSSQ     | 82 | 1530.727 | 5.96E-26 | 1 |
| NKY-1         | EDSFSDWLQRGHVA      | 83 | 1645.749 | 9.80E-08 | 2 |
| NKY-2         | FTDFAM*PYLKYKVSPVD  | 84 | 2035.997 | 3.45E-03 | 2 |
| FVRiamide     | VSSFVRiam           | 85 | 805.481  | 4.61E-10 | 1 |
| FVRiamide     | ASSFVRiam           | 86 | 777.450  | 3.01E-06 | 1 |
| GNXQN         | AAEQVIFGNHQNNARV    | 87 | 1766.881 | 3.26E-07 | 5 |
| GNXQN         | DELEAQRFYAEDFPE     | 88 | 1857.806 | 4.71E-04 | 2 |
| LXRX          | DRDLEEPELSRT        | 89 | 1458.695 | 6.68E-03 | 1 |
| LXRX          | DVESSPTLAKE         | 90 | 1174.572 | 2.57E-04 | 1 |
| CLCCY         | RPSATNQEEEVDQANVARL | 91 | 2126.035 | 7.59E-15 | 2 |

### **Annelid specific pNPs**

|                  |                     |     |          |           |   |
|------------------|---------------------|-----|----------|-----------|---|
| FVMamide N-term. | DRPSYIDFLM*GS       | 92  | 1415.639 | 9.55E-04  | 1 |
| FVMamide N-term. | AERPSFSEFFM*am      | 93  | 1361.607 | 1.36E-03  | 1 |
| FVMamide N-term. | DAPNYLDFM*TLDDQHV   | 94  | 1908.820 | 1.36E-06  | 1 |
| FVMamide N-term. | (gl)QEEKQNYDSFVM*am | 95  | 1514.635 | 4.34E-04  | 2 |
| FVMamide N-term. | QEEKQNYDSFVM*am     | 96  | 1531.661 | 4.70E-03  | 1 |
| FVMamide N-term. | SDKDYSNFVM*am       | 97  | 1219.518 | 8.19E-04  | 1 |
| FVMamide N-term. | NAKDYSNFVM*am       | 98  | 1202.539 | 5.24E-04  | 1 |
| FVMamide         | NADDYSKFVM*am       | 99  | 1203.523 | 1.16E-03  | 2 |
| FVMamide         | NDGDYSKFVMam        | 100 | 1173.513 | 1.72E-06  | 1 |
| FVMamide         | NDGDYSKFVM*am       | 101 | 1189.507 | 2.09E-03  | 1 |
| FVMamide         | NDKDYSNFVM*am       | 102 | 1246.529 | 4.72E-08  | 2 |
| FVMamide         | SHGPQNYENFVM*E      | 103 | 1566.641 | 3.29E-04  | 1 |
| FVMamide         | KNYQDFVM*am         | 104 | 1058.486 | 1.65E-05  | 1 |
| DLamide          | YSSFRAIDLam         | 105 | 956.472  | 7.38E-04  | 2 |
| SLRFamide        | DDGNLGSLLLK         | 106 | 1200.635 | 1.18E-04  | 1 |
| QUERAS           | SAAAAAANNHVKISSPRQ  | 107 | 1791.934 | 6.57E-112 | 7 |
| MNC              | FQLGQRIN            | 108 | 974.530  | 8.27E-04  | 4 |
| LEQ              | ESTKEILGLEQEL       | 109 | 1487.772 | 1.84E-04  | 2 |

**Platynereis specific pNPs**

|          |                            |     |          |          |   |
|----------|----------------------------|-----|----------|----------|---|
| WLD      | WLDNSQFKDED                | 110 | 1395.594 | 9.02E-03 | 1 |
| WLD      | WLDNSQFRED                 | 111 | 1308.574 | 4.03E-03 | 1 |
| SPY      | DVNPSDELIGTKQD             | 112 | 1529.721 | 1.04E-07 | 2 |
| SPY      | SPYAKFM*GSSED              | 113 | 1333.550 | 1.40E-04 | 1 |
| SPY      | SPYAKFMGSSED               | 114 | 1317.555 | 3.85E-05 | 2 |
| SPY      | SPYASF*GSNDEE              | 115 | 1448.540 | 1.29E-03 | 1 |
| SPY      | SPIAKLMGSND                | 116 | 1131.559 | 6.42E-03 | 1 |
| SPY      | SPIAKLM*GSND               | 117 | 1147.554 | 1.19E-03 | 2 |
| SPY      | SPIAKLM*GSKDD              | 118 | 1276.633 | 1.29E-03 | 3 |
| SPY      | SPIAKLMGSDD                | 119 | 1219.576 | 1.50E-05 | 1 |
| SPY      | SPIAKLM*GSSDD              | 120 | 1235.570 | 6.23E-05 | 3 |
| SPY      | SPYAKFM TGDEE              | 121 | 1373.581 | 2.55E-04 | 1 |
| SPY      | SPYAKFM*TGDEE              | 122 | 1389.576 | 5.57E-05 | 2 |
| SPY      | SPYAKFMGSNEE               | 123 | 1358.581 | 4.12E-03 | 1 |
| SPY      | SPYAKFLNED                 | 124 | 1182.556 | 3.29E-03 | 1 |
| HIGA     | HLGSAIRWVDANRGRPGLE        | 125 | 2103.109 | 6.32E-03 | 1 |
| HIGA     | HIGAAM*NLAQADNENM*D        | 126 | 1845.762 | 9.46E-05 | 1 |
| HIGA     | HIGAAM*NLVGLKEDNENM*D      | 127 | 2101.941 | 6.84E-03 | 1 |
| HIGA     | HIGAAM*NLVSPNNDNKDAE       | 128 | 2024.922 | 4.67E-04 | 1 |
| AYNPY    | AYNPYDWRSFSAADLE           | 129 | 1903.838 | 1.13E-05 | 3 |
| AYNPY    | AYNPYDWRSF DSTDFE          | 130 | 2011.822 | 7.37E-04 | 2 |
| YTL      | SSNDFDIDPY                 | 131 | 1171.467 | 8.54E-03 | 1 |
| YTL      | YTLGTSYGGSYNNDNSDGYPH      | 132 | 2280.920 | 8.44E-06 | 2 |
| Qpeptin  | FYIRDDDAALSEA              | 133 | 1484.678 | 2.02E-04 | 1 |
| Qpeptin  | SDEERDELGAYDPFALFN         | 134 | 2086.912 | 2.21E-17 | 3 |
| Qpeptin  | DAEAEFEFAEAVAAEAL EEVADAEQ | 135 | 2635.130 | 7.75E-05 | 2 |
| Qpeptin  | NAEEEF AEAVAGEALDTVAEAEQ   | 136 | 2392.055 | 9.18E-07 | 1 |
| Qpeptin  | NAEENFTEDAEERDLED M*       | 137 | 2171.844 | 8.98E-03 | 1 |
| THDamide | ARGGPIAAPLWFLKTHDam        | 138 | 1848.016 | 1.68E-04 | 4 |
| YYQamide | RTLTDPADELVYIE             | 139 | 1633.820 | 8.28E-06 | 1 |
| FGamide  | KQLGPQQPSPW                | 140 | 1264.656 | 6.57E-03 | 1 |
| LPWamide | DLGGVEKVALEEALDK           | 141 | 1684.888 | 1.55E-10 | 2 |
| GYamide  | NFDRNGWGGGYam              | 142 | 1240.537 | 2.29E-05 | 1 |
| SLL      | NSVKSPNSASLL               | 143 | 1215.646 | 1.94E-05 | 2 |
| SHM      | AIEVNSVEEYESHM             | 144 | 1635.709 | 1.66E-06 | 1 |
| SHM      | AIEVNSVEEYESHM*            | 145 | 1651.704 | 1.44E-03 | 2 |
| RNT      | PDIRSLLAASMF RNT           | 146 | 1690.883 | 9.23E-03 | 1 |

# peptide ID 1

Source: 20120515\_CO\_0340Gaje\_R01  
Scannumber: 15756  
Protein: pep\_180; pep\_secretome\_488  
Peptide Score: 71.15  
Method: FTMS; HCD; 1

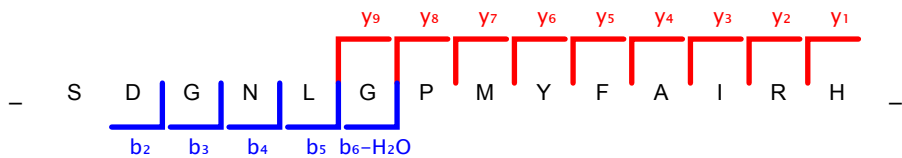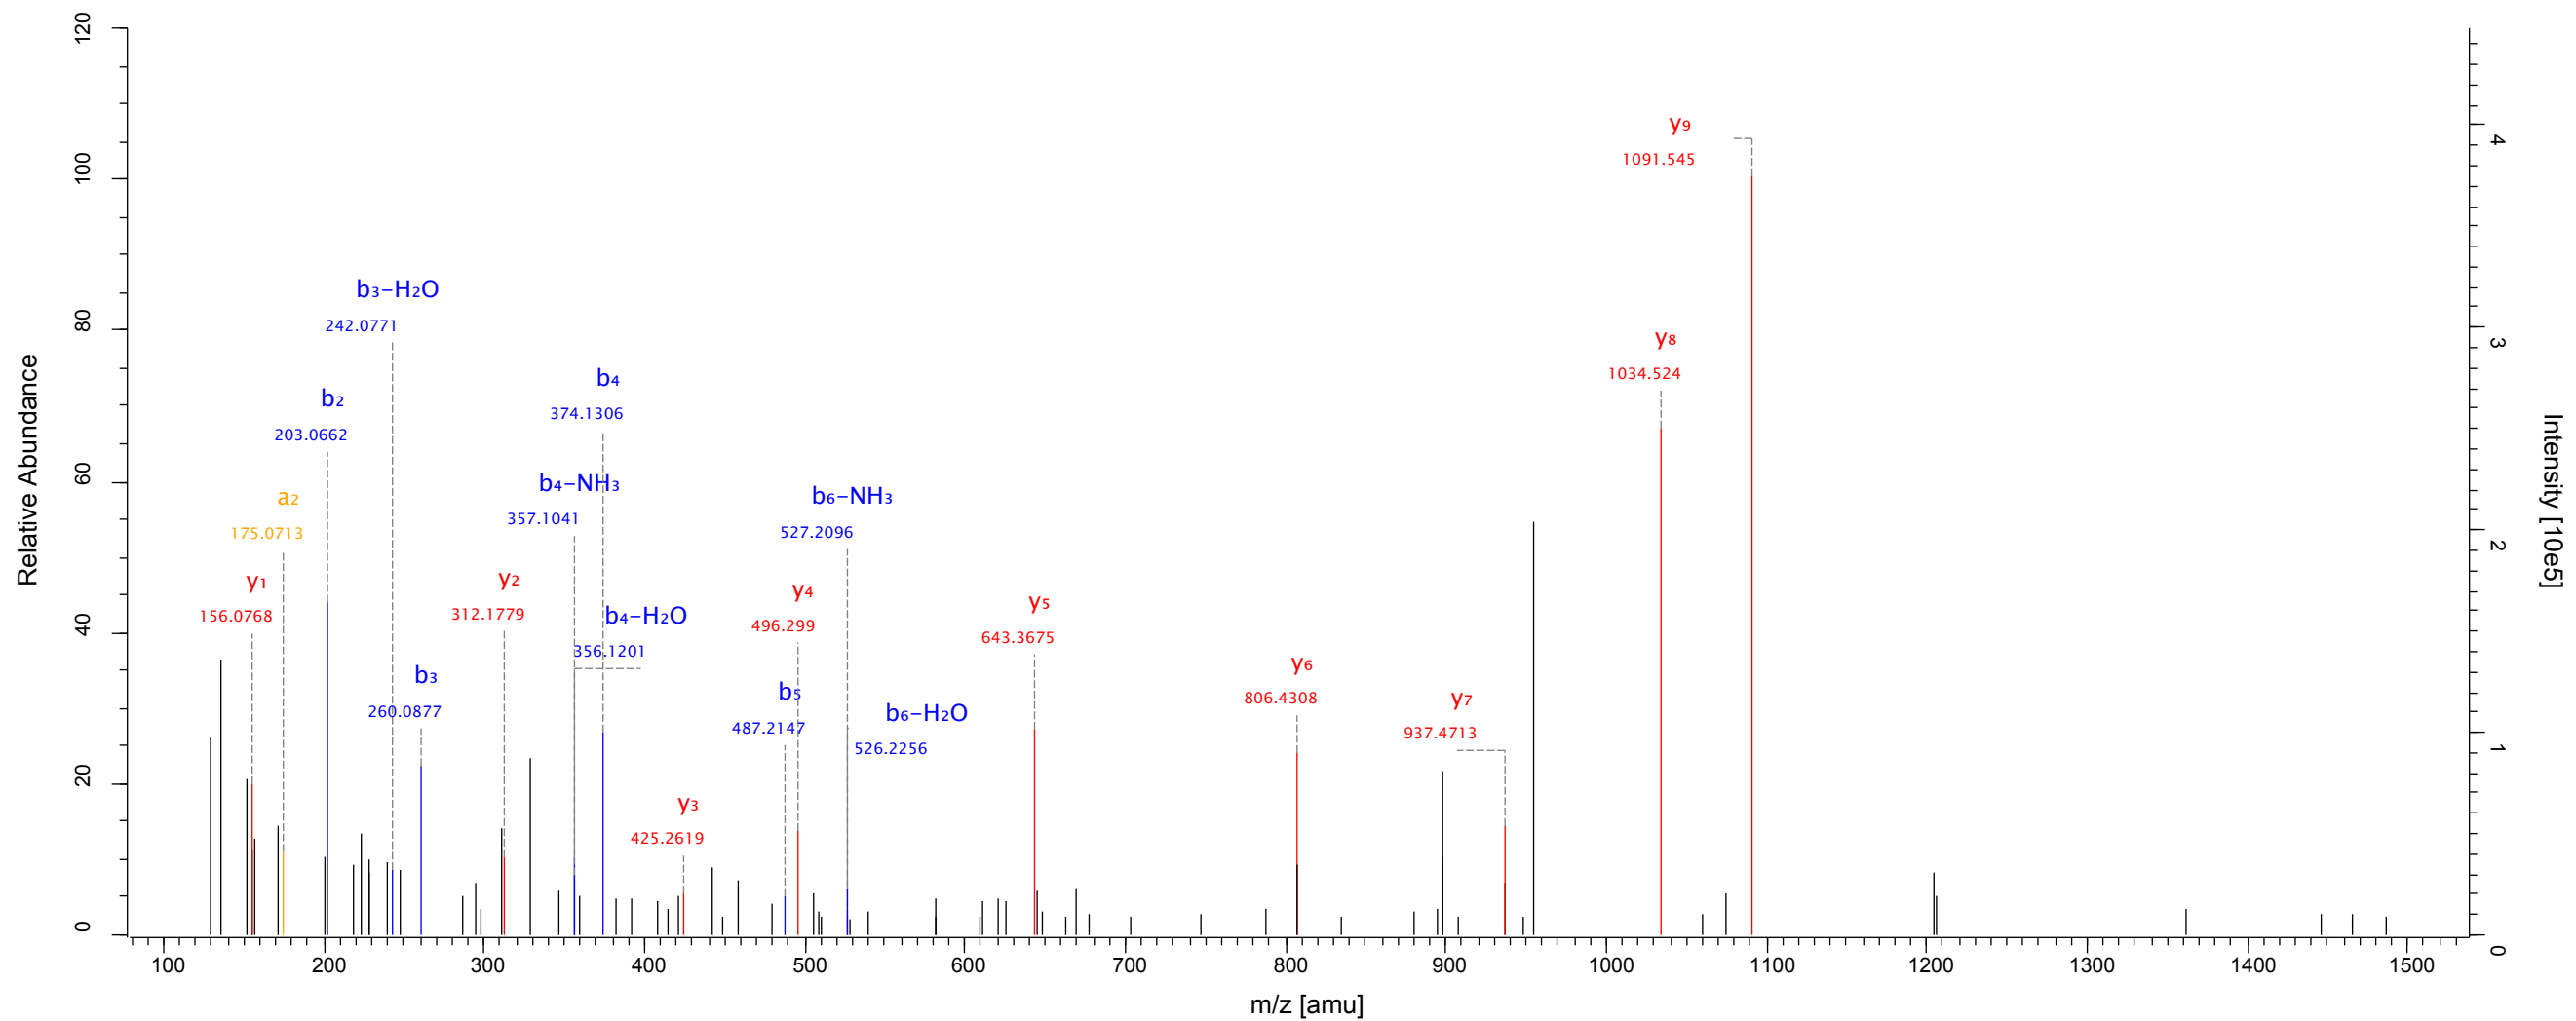

# peptide ID 2

Source: 20120816\_CO\_0340Gaje\_R02  
Scannumber: 11042  
Protein: pep\_180; pep\_secretome\_488  
Peptide Score: 89.4  
Method: FTMS; HCD; 1

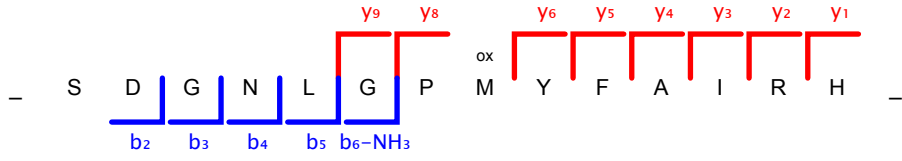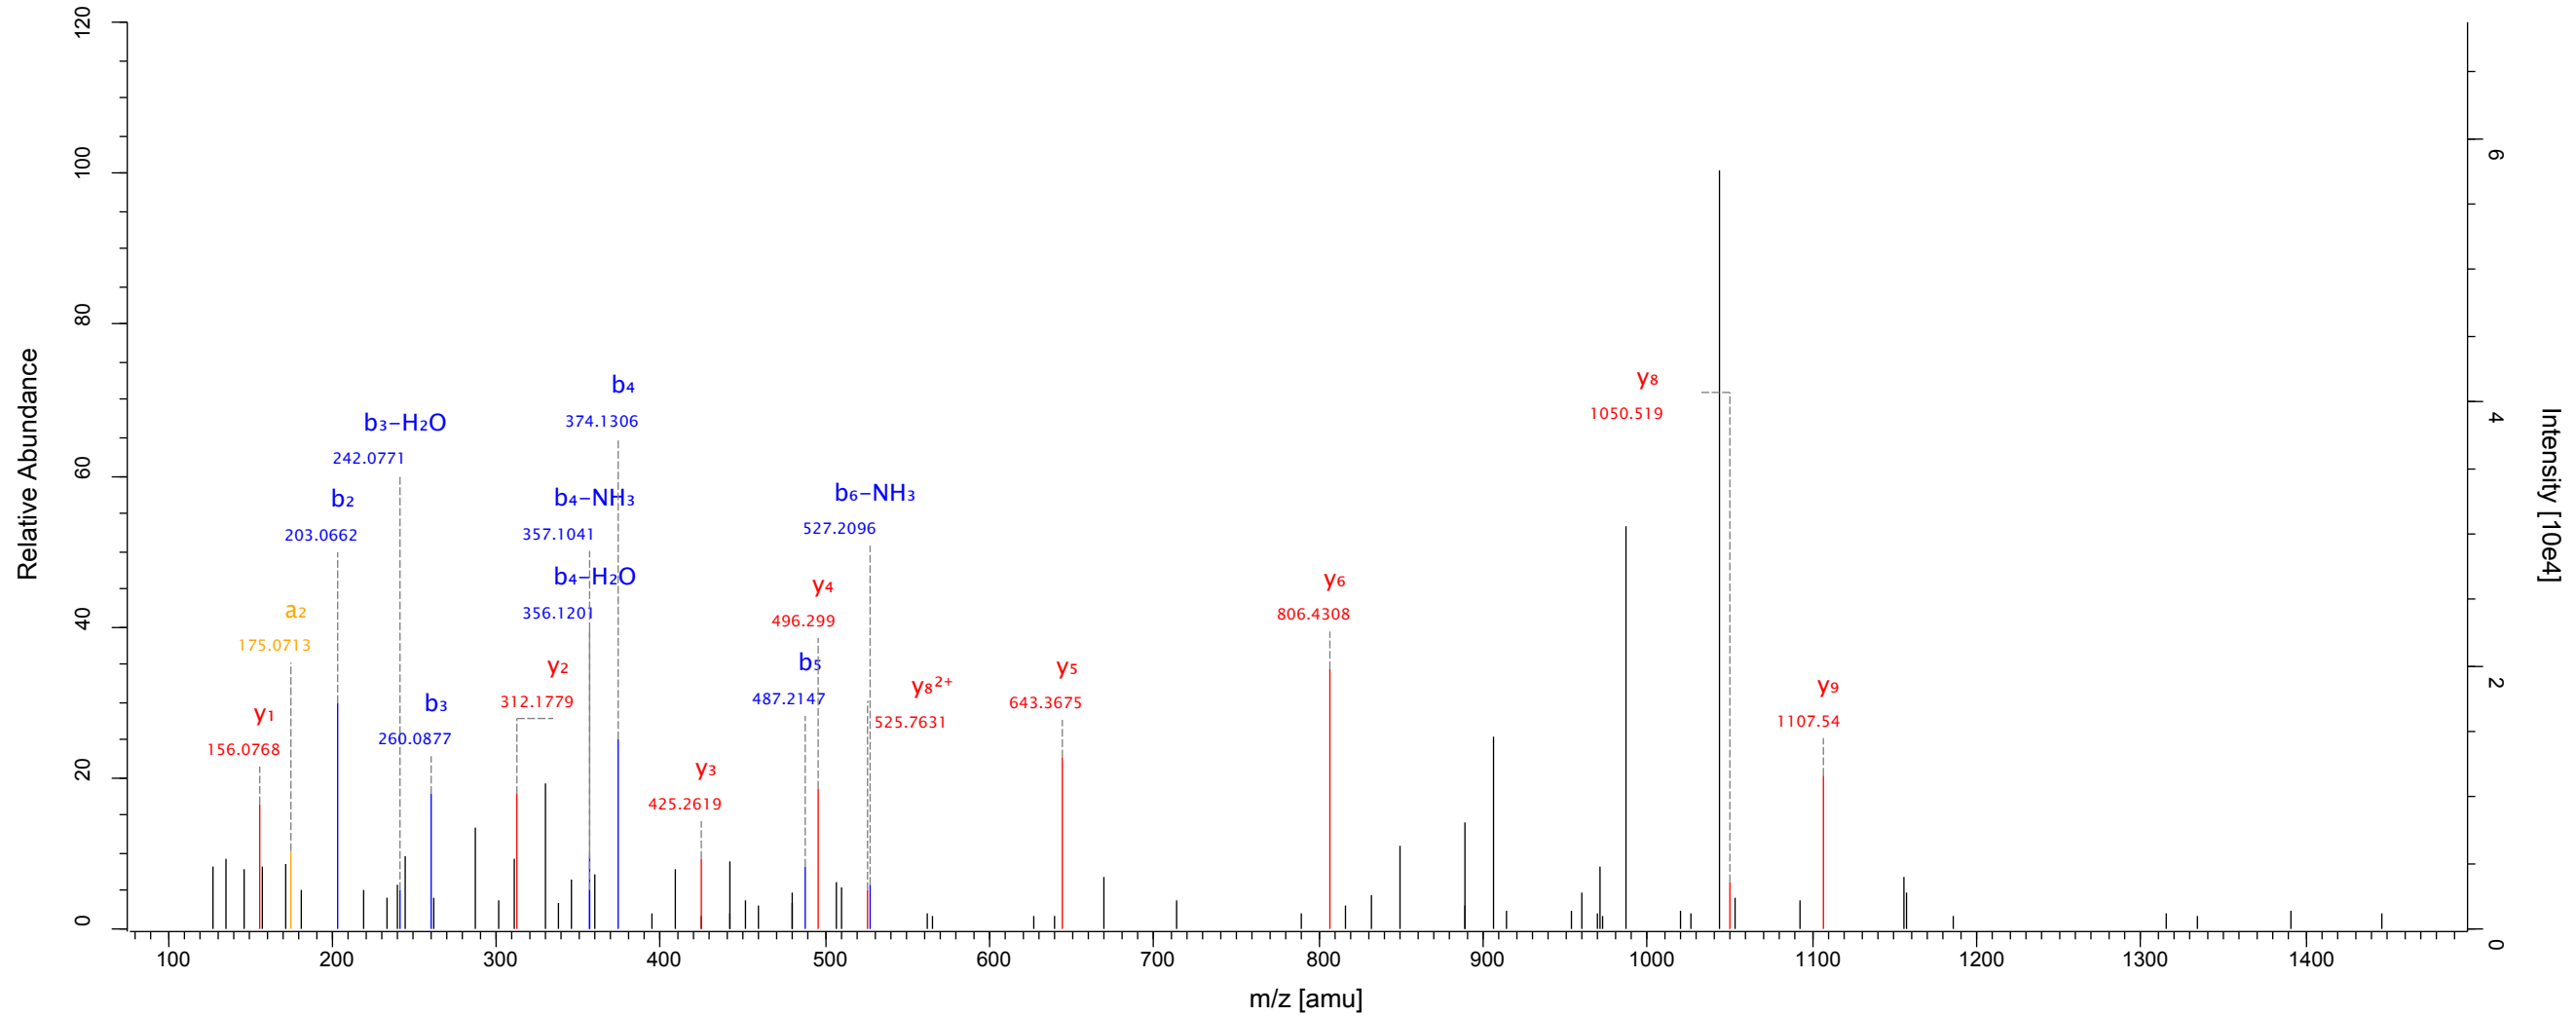

# peptide ID 3

Source: 20120515\_CO\_0340Gaje\_R01  
Scannumber: 17844  
Protein: SinglePep35  
Peptide Score: 128.17  
Method: FTMS; HCD; 1

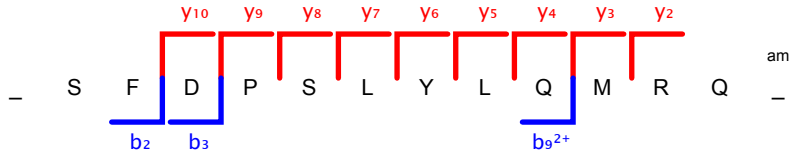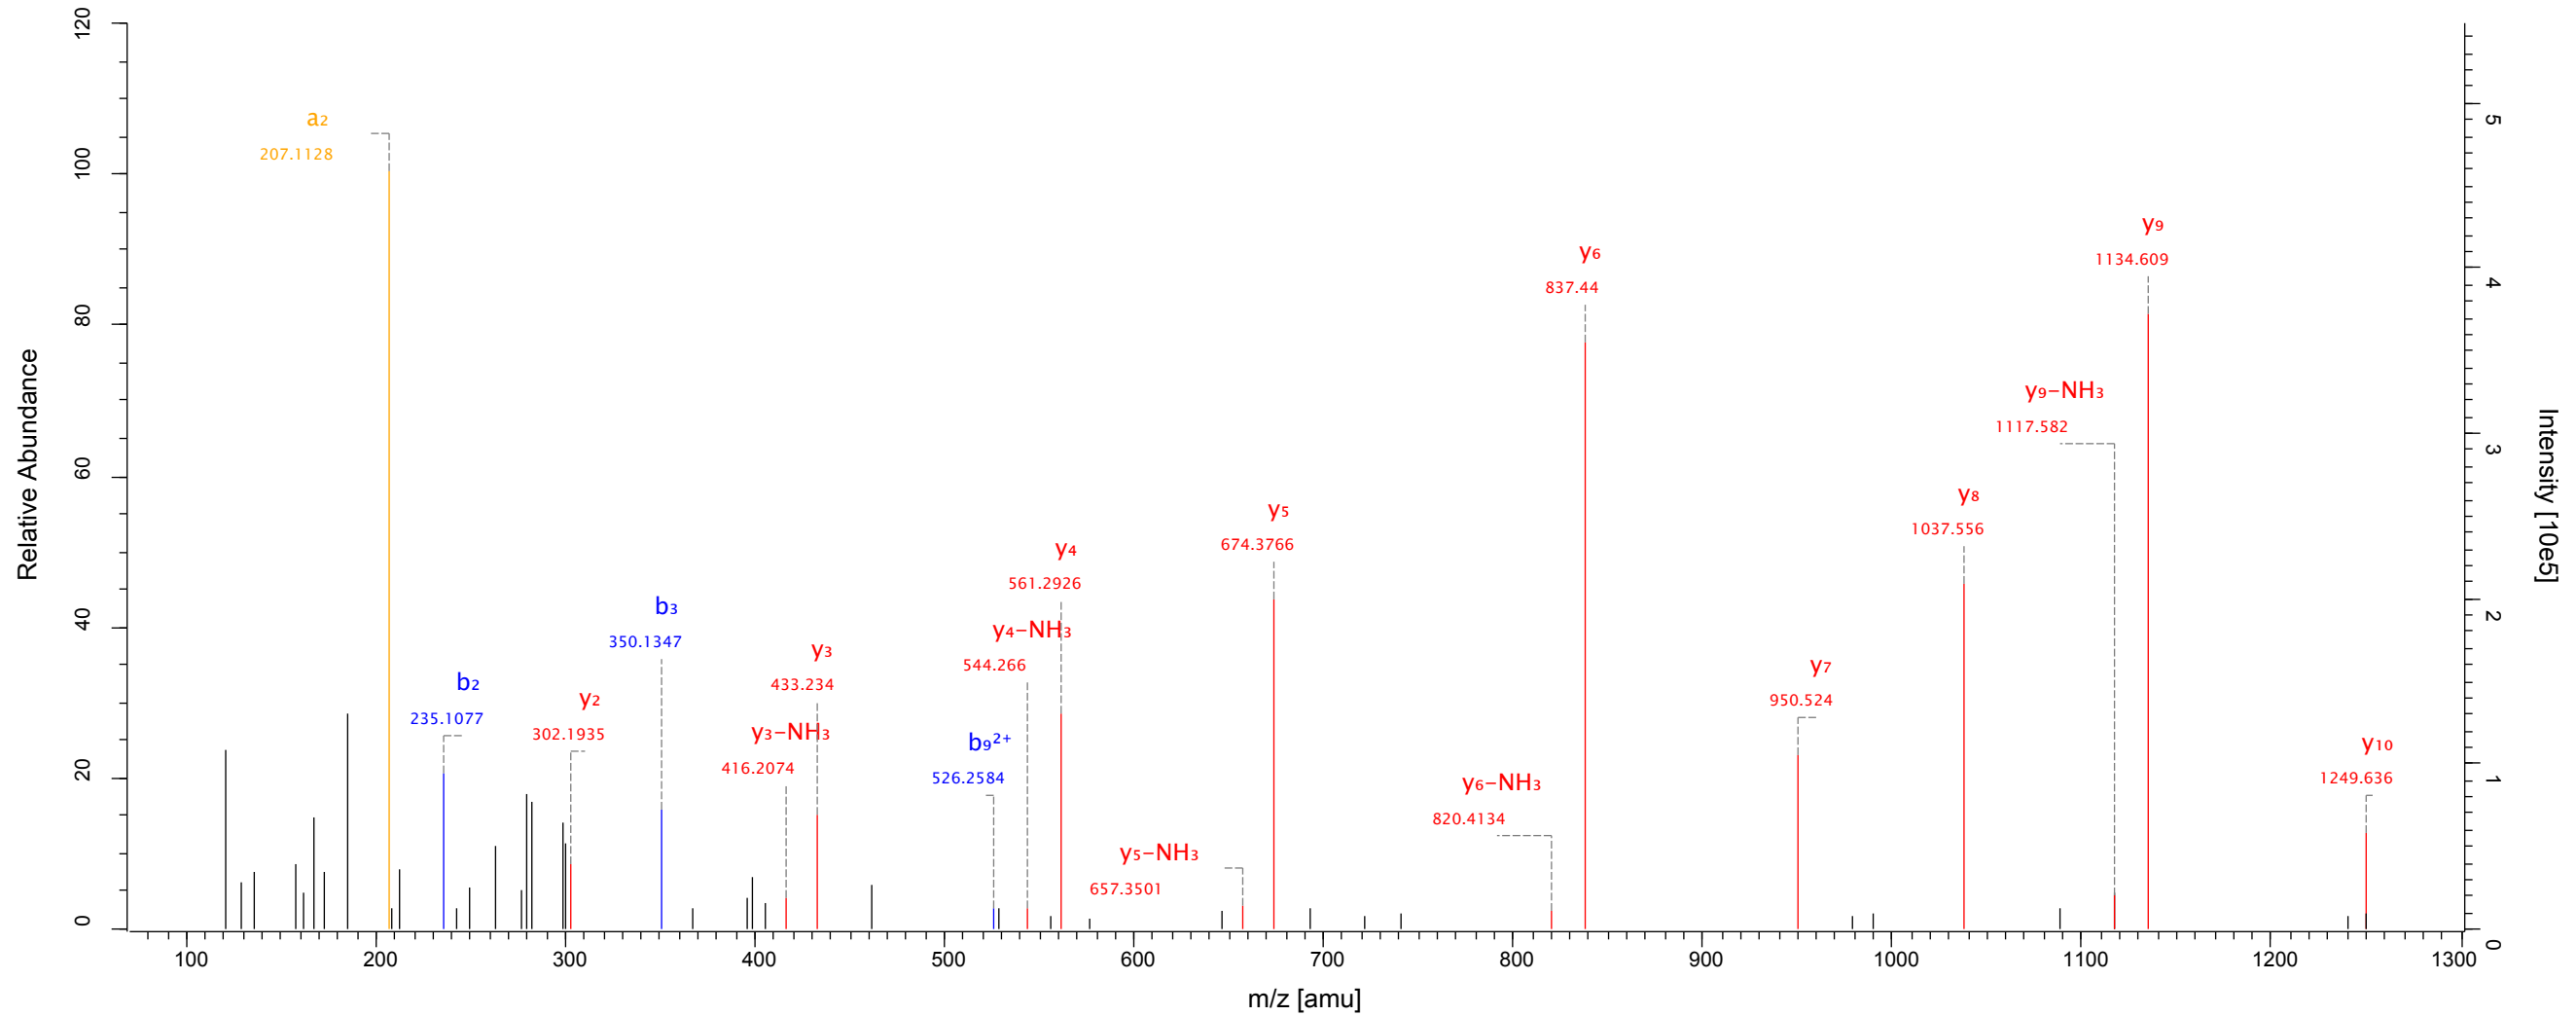

# peptide ID 4

Source: 20120816\_CO\_0340Gaje\_R02  
Scannumber: 12493  
Protein: SinglePep35  
Peptide Score: 82.17  
Method: FTMS; HCD; 1

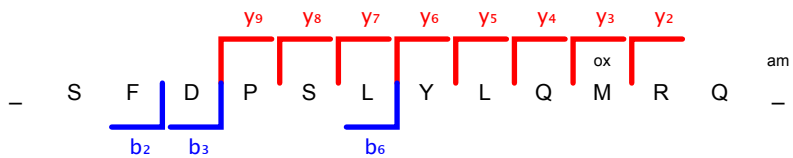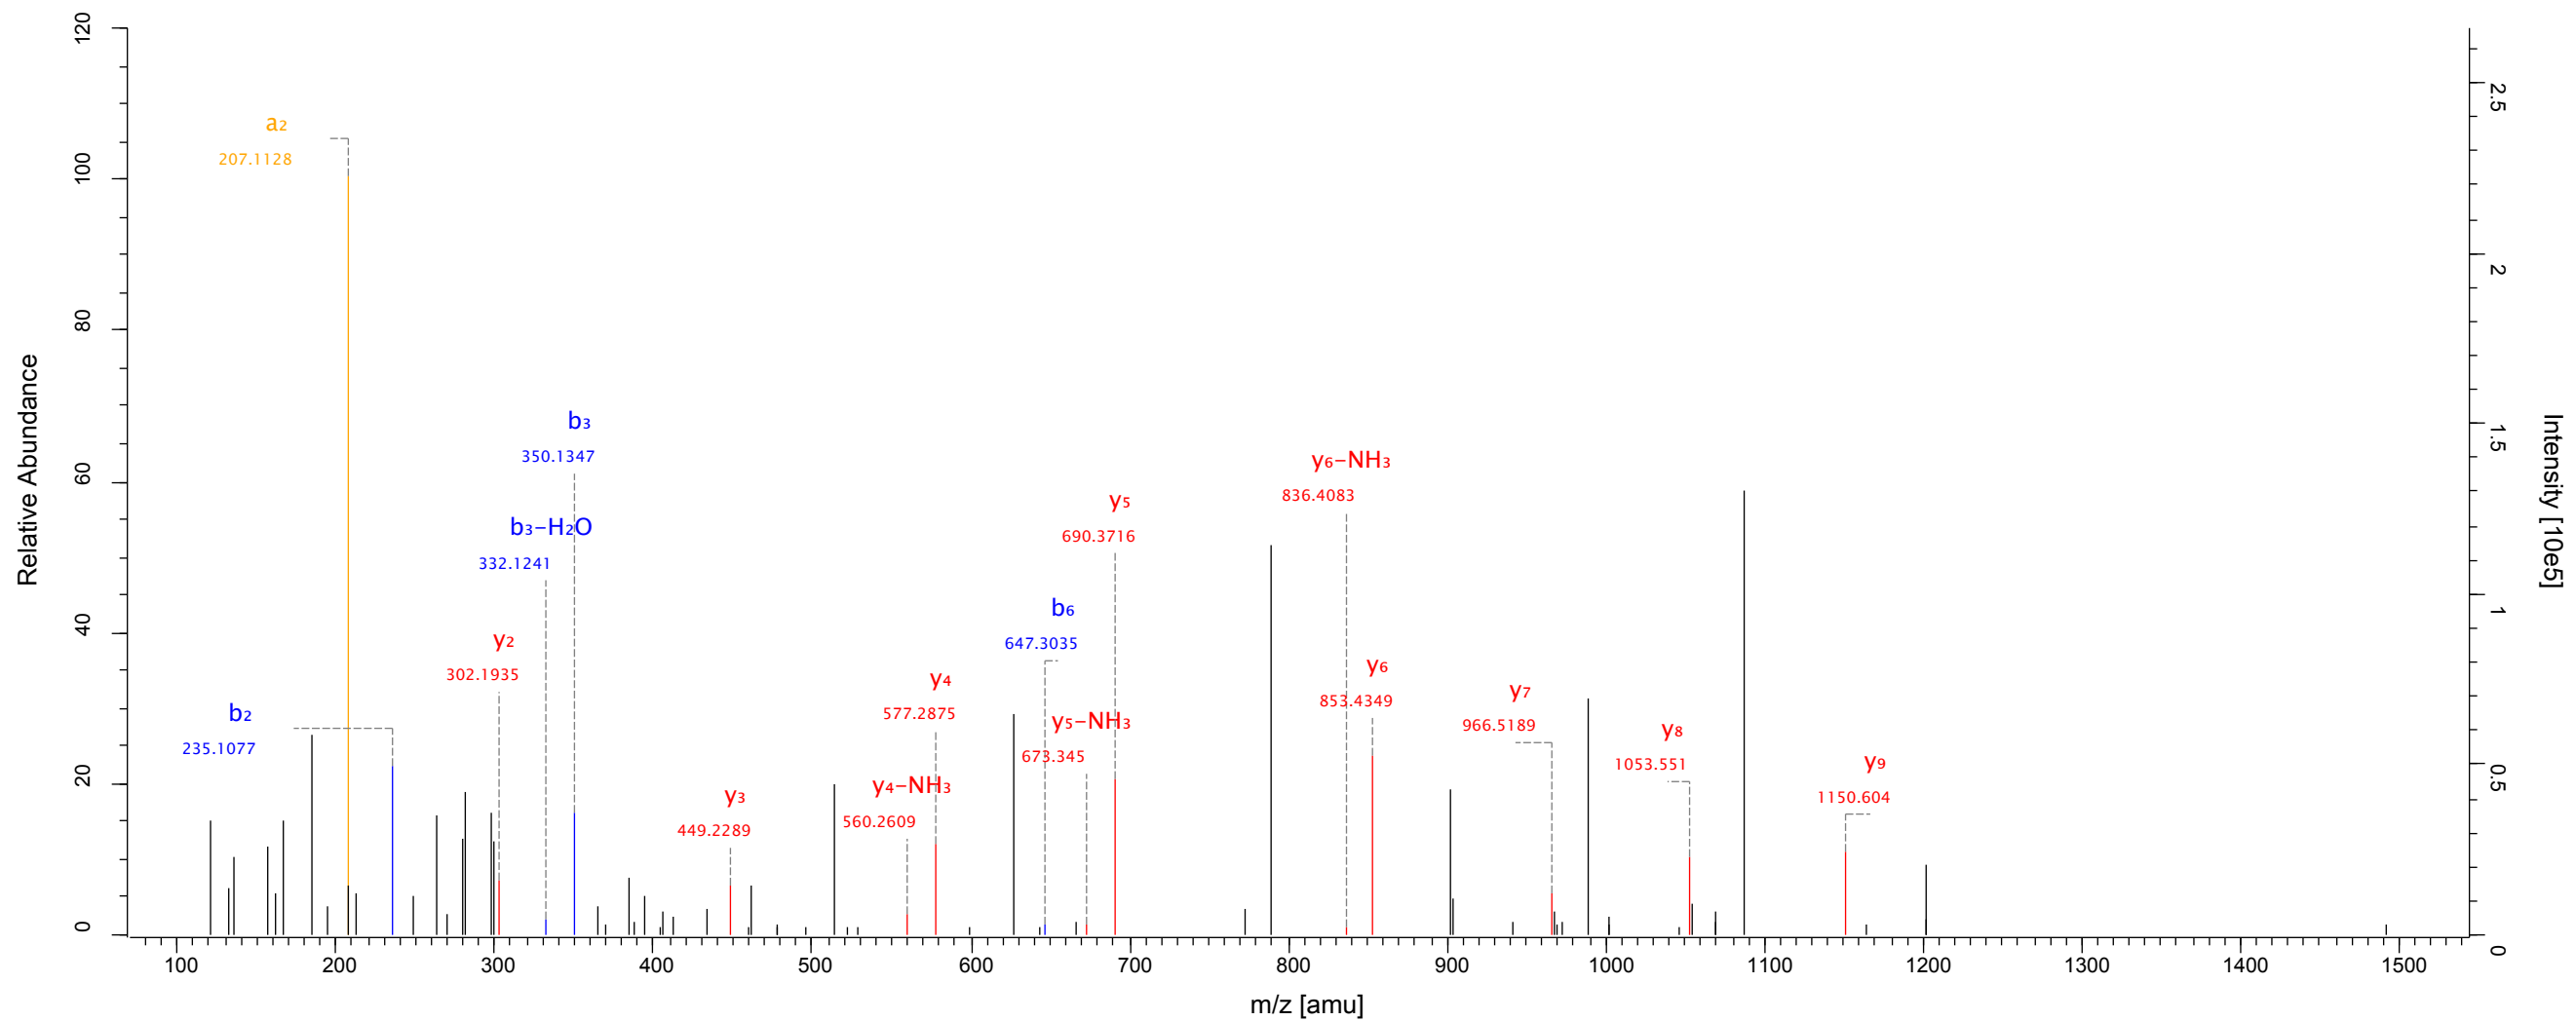



# peptide ID 5

Source: 20120816\_CO\_0340Gaje\_R02  
Scannumber: 14399  
Protein: pep\_181; pep\_secretome\_489; pep\_secretome\_23365  
Peptide Score: 76.71  
Method: FTMS; HCD; 1

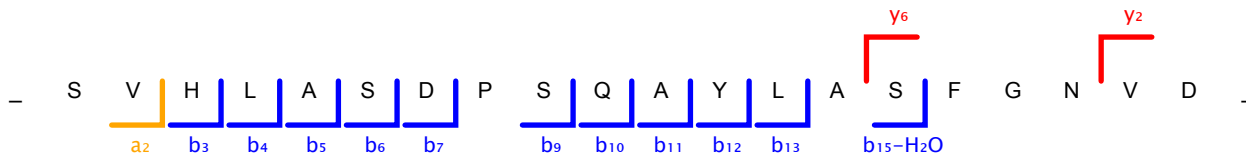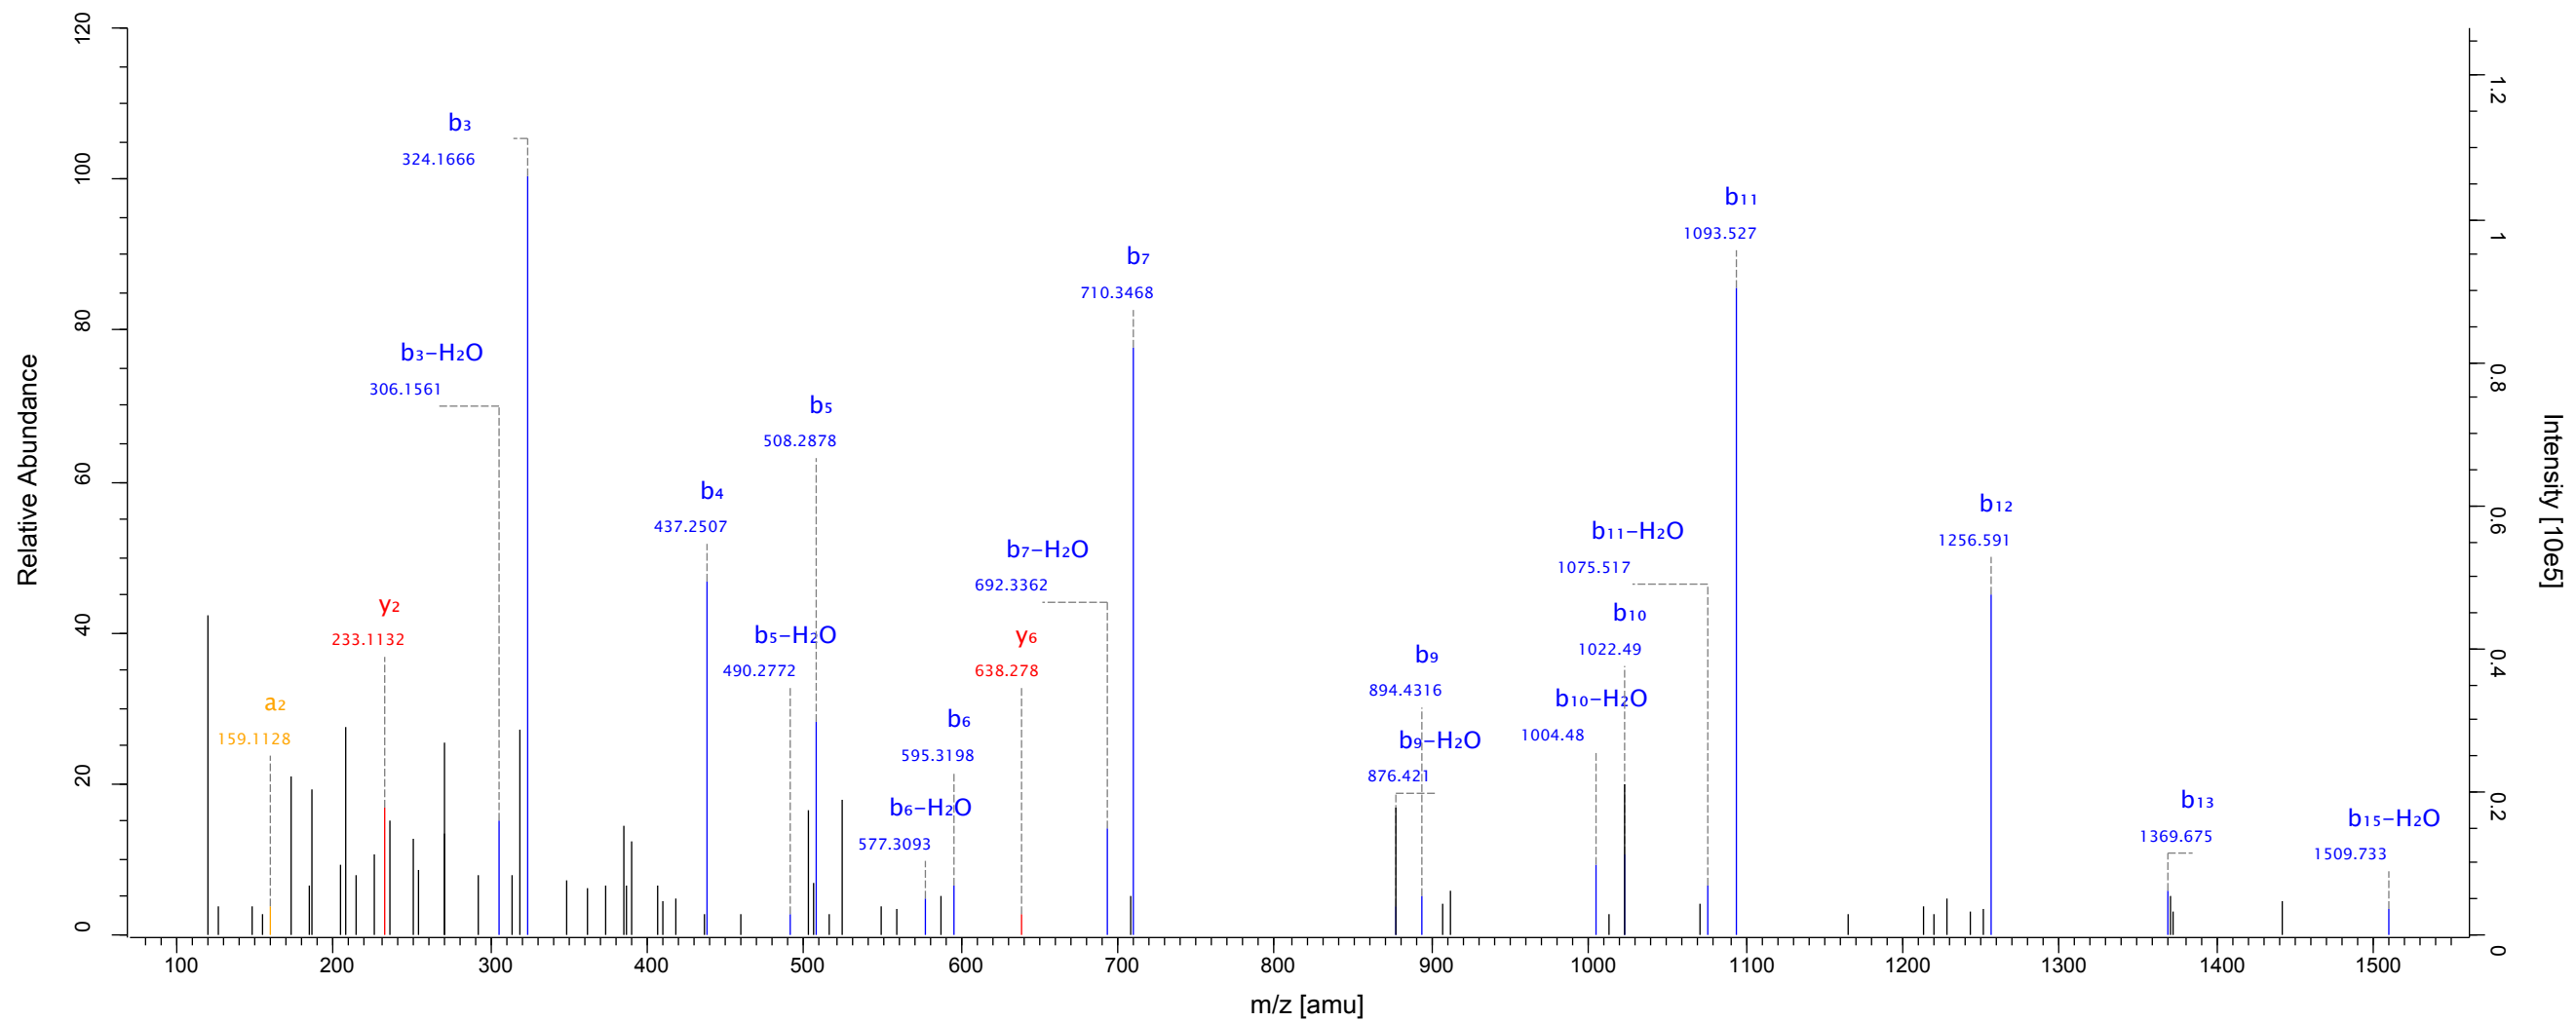

# peptide ID 6

Source: 20120816\_CO\_0340Gaje\_R02  
Scannumber: 5888  
Protein: pep\_secretome\_23368  
Peptide Score: 105.14  
Method: FTMS; HCD; 1

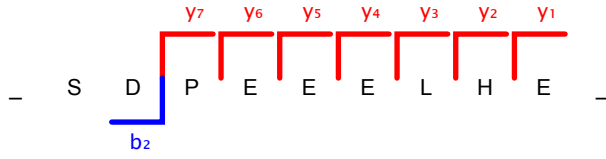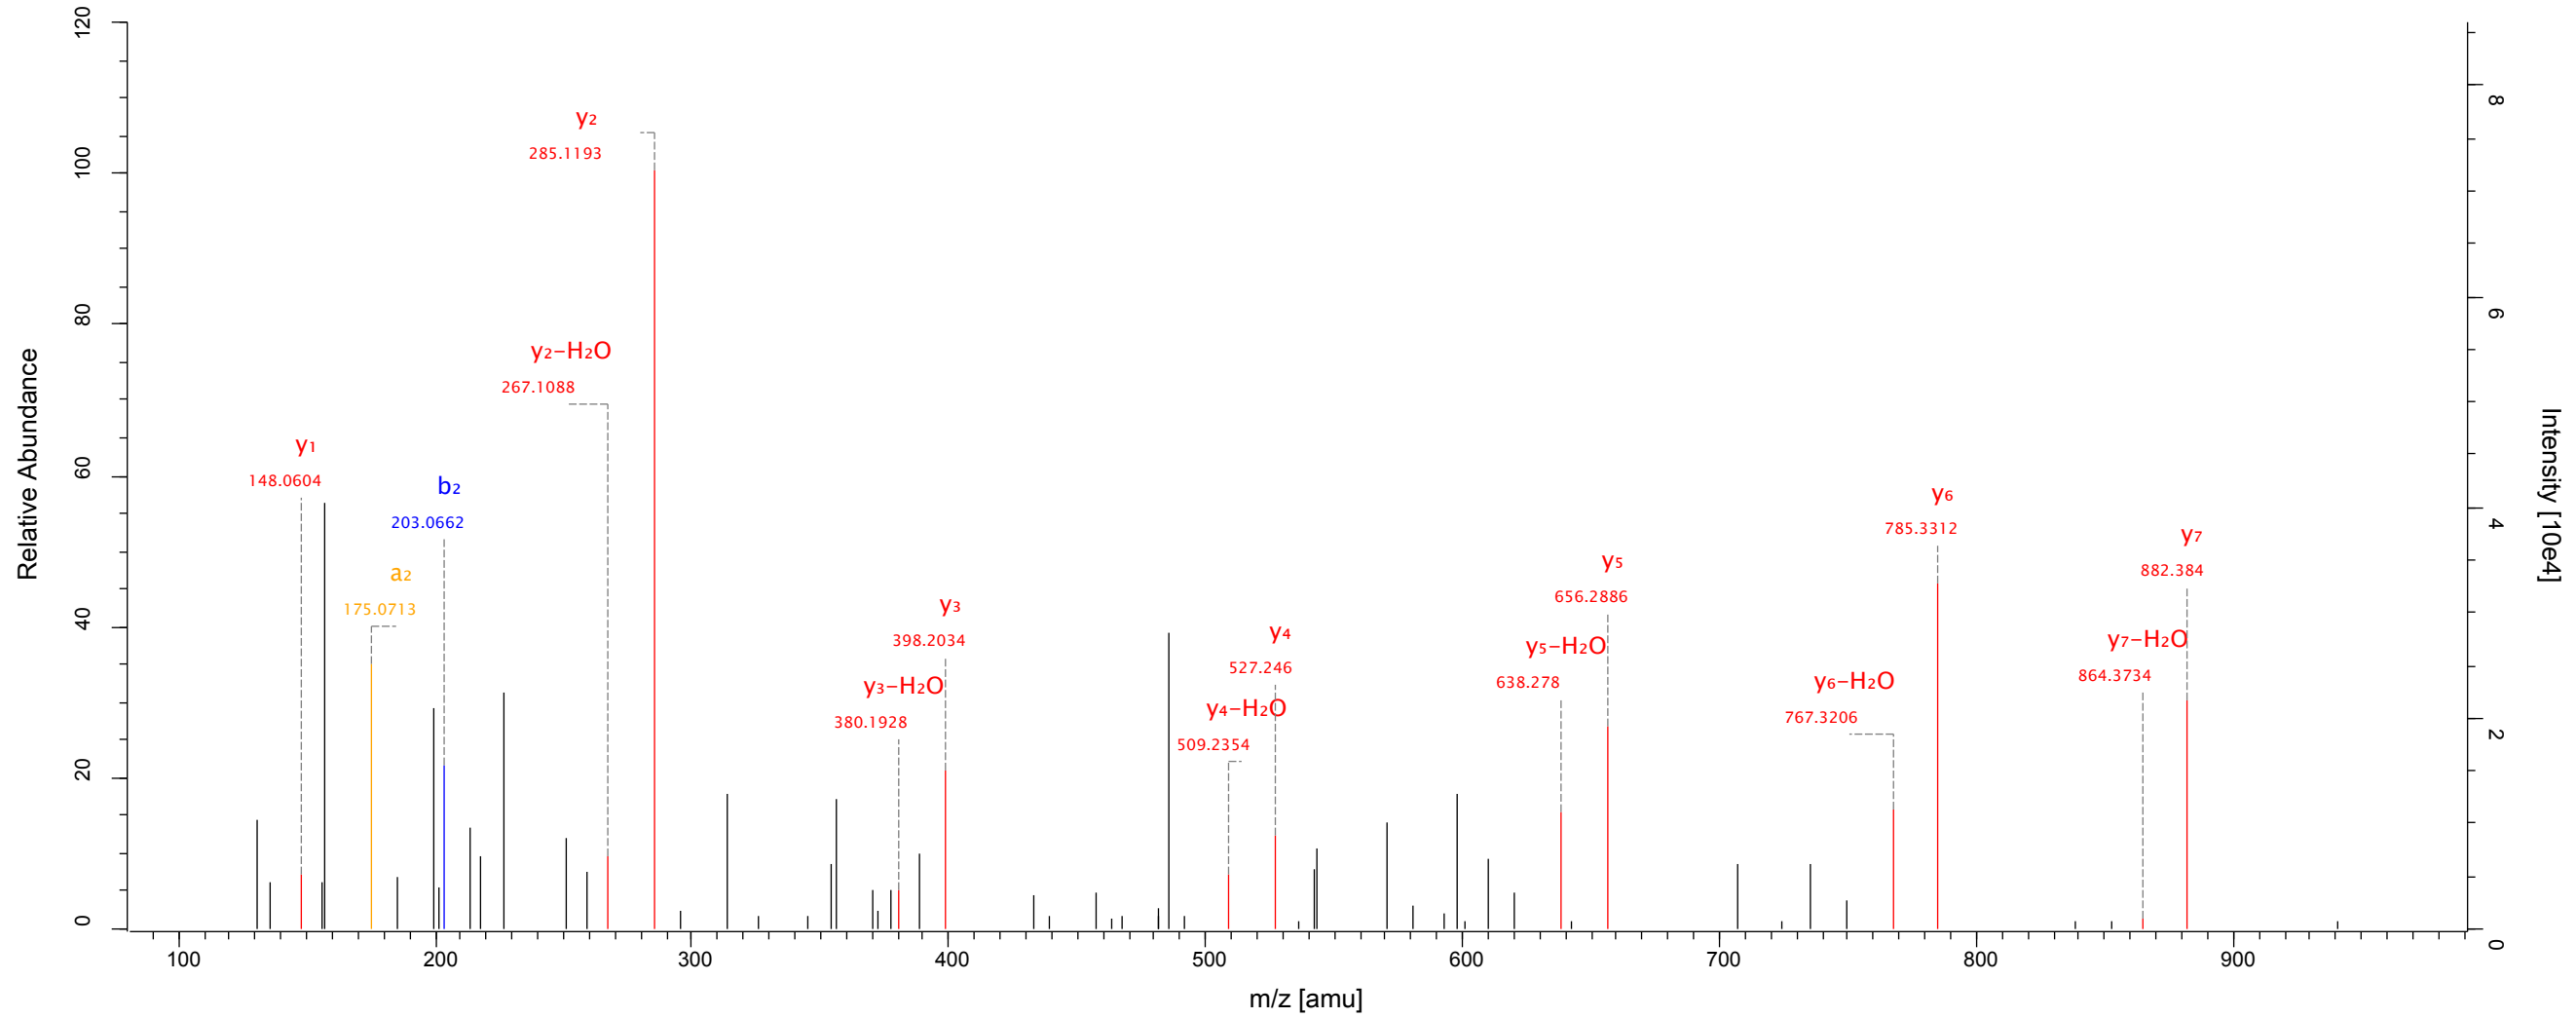

# peptide ID 7

Source: 20120816\_CO\_0340Gaje\_R02  
Scannumber: 8800  
Protein: pep\_secretome\_502  
Peptide Score: 77.67  
Method: FTMS; HCD; 1

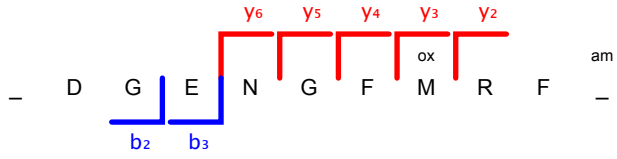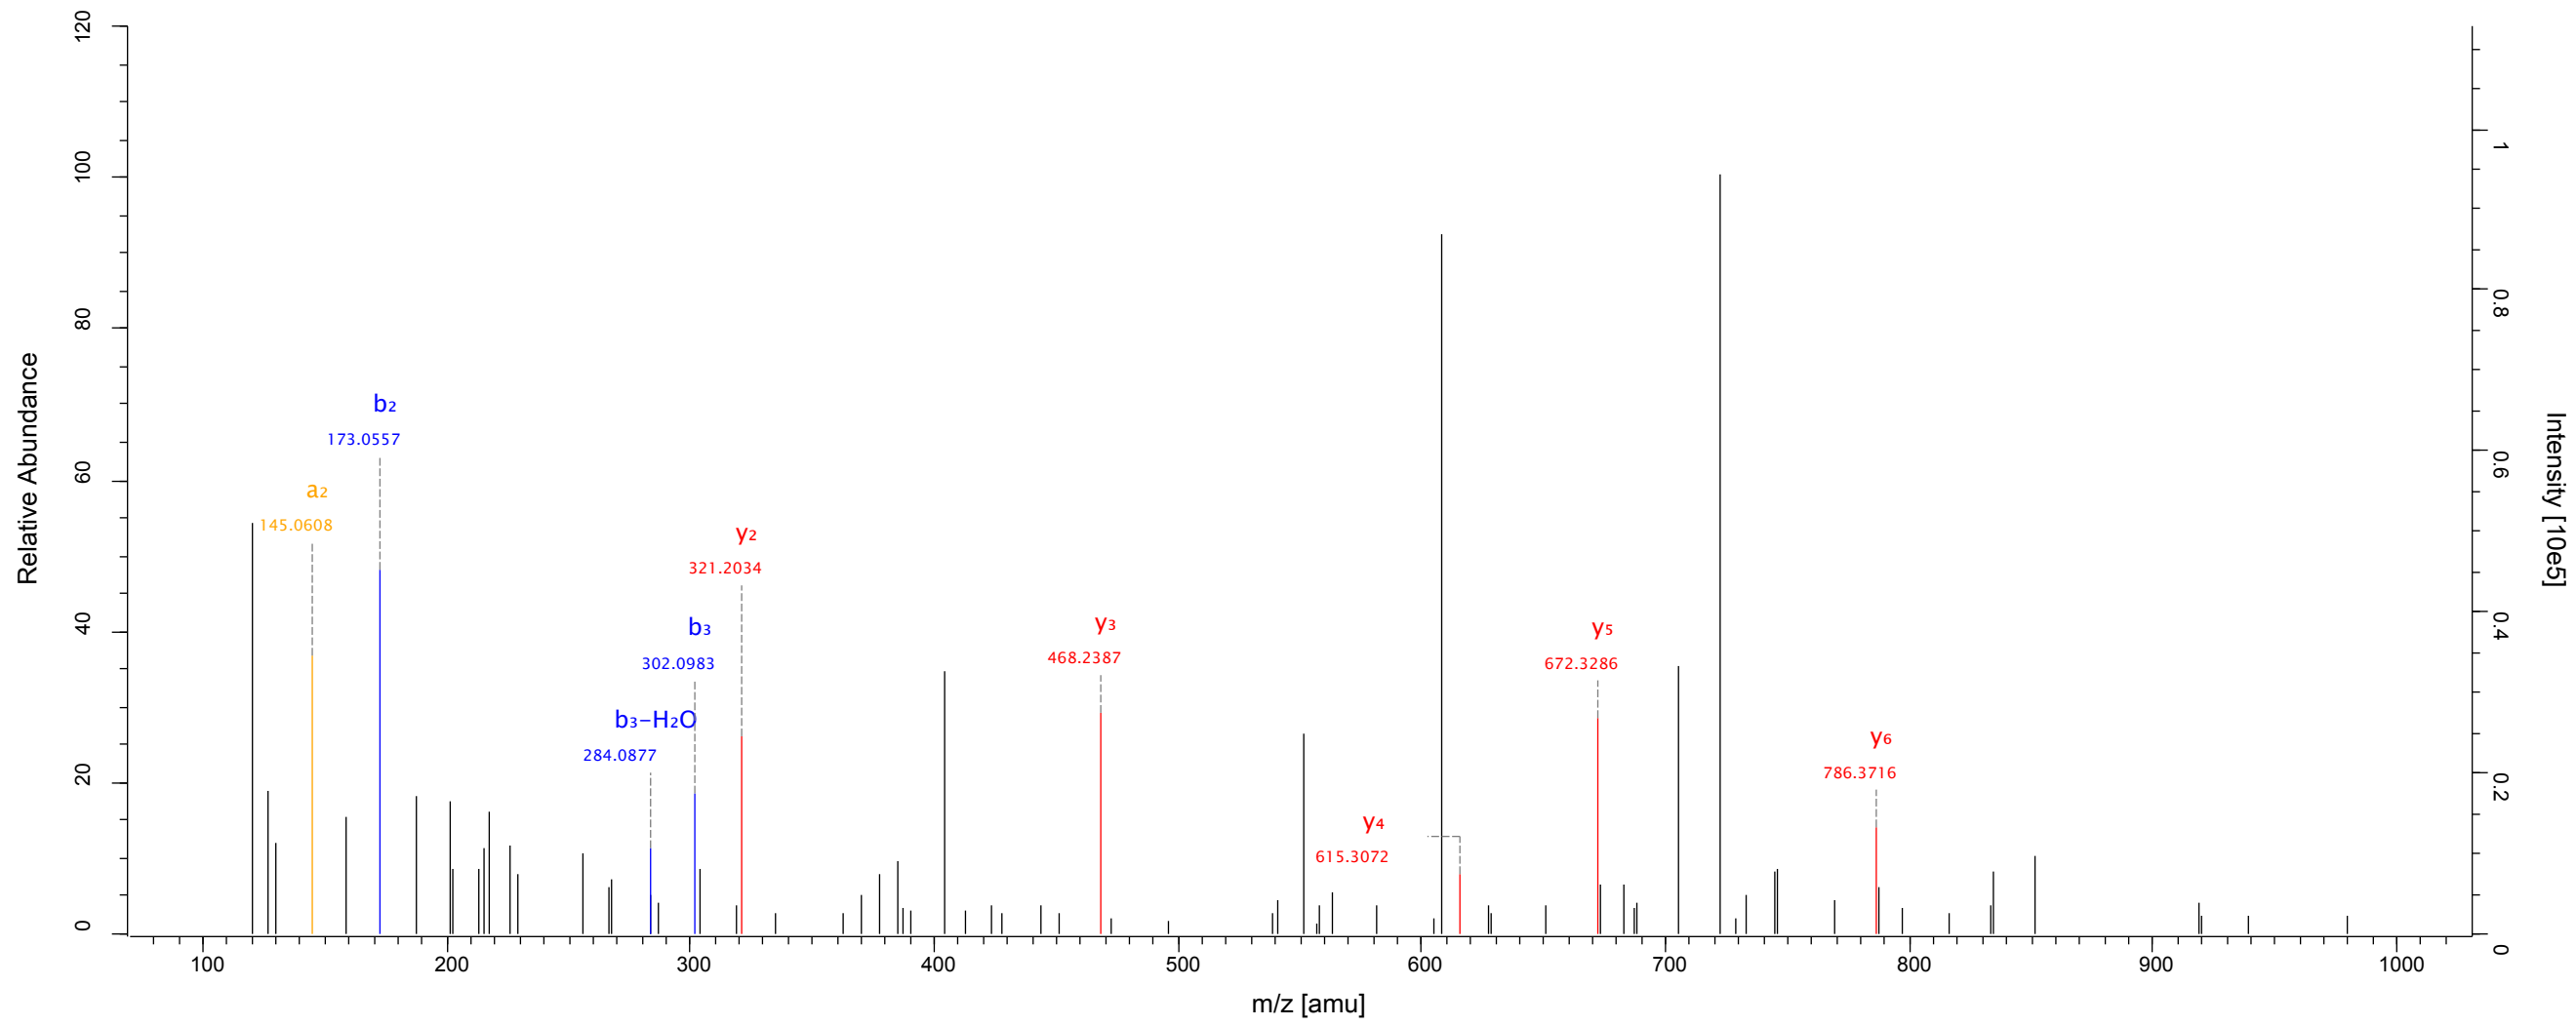

# peptide ID 8

Source: 20120816\_CO\_0340Gaje\_R02  
Scannumber: 7730  
Protein: SinglePep25  
Peptide Score: 130.51  
Method: FTMS; HCD; 1

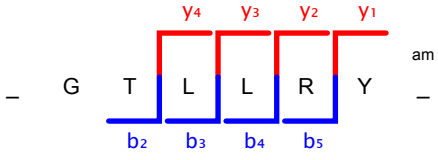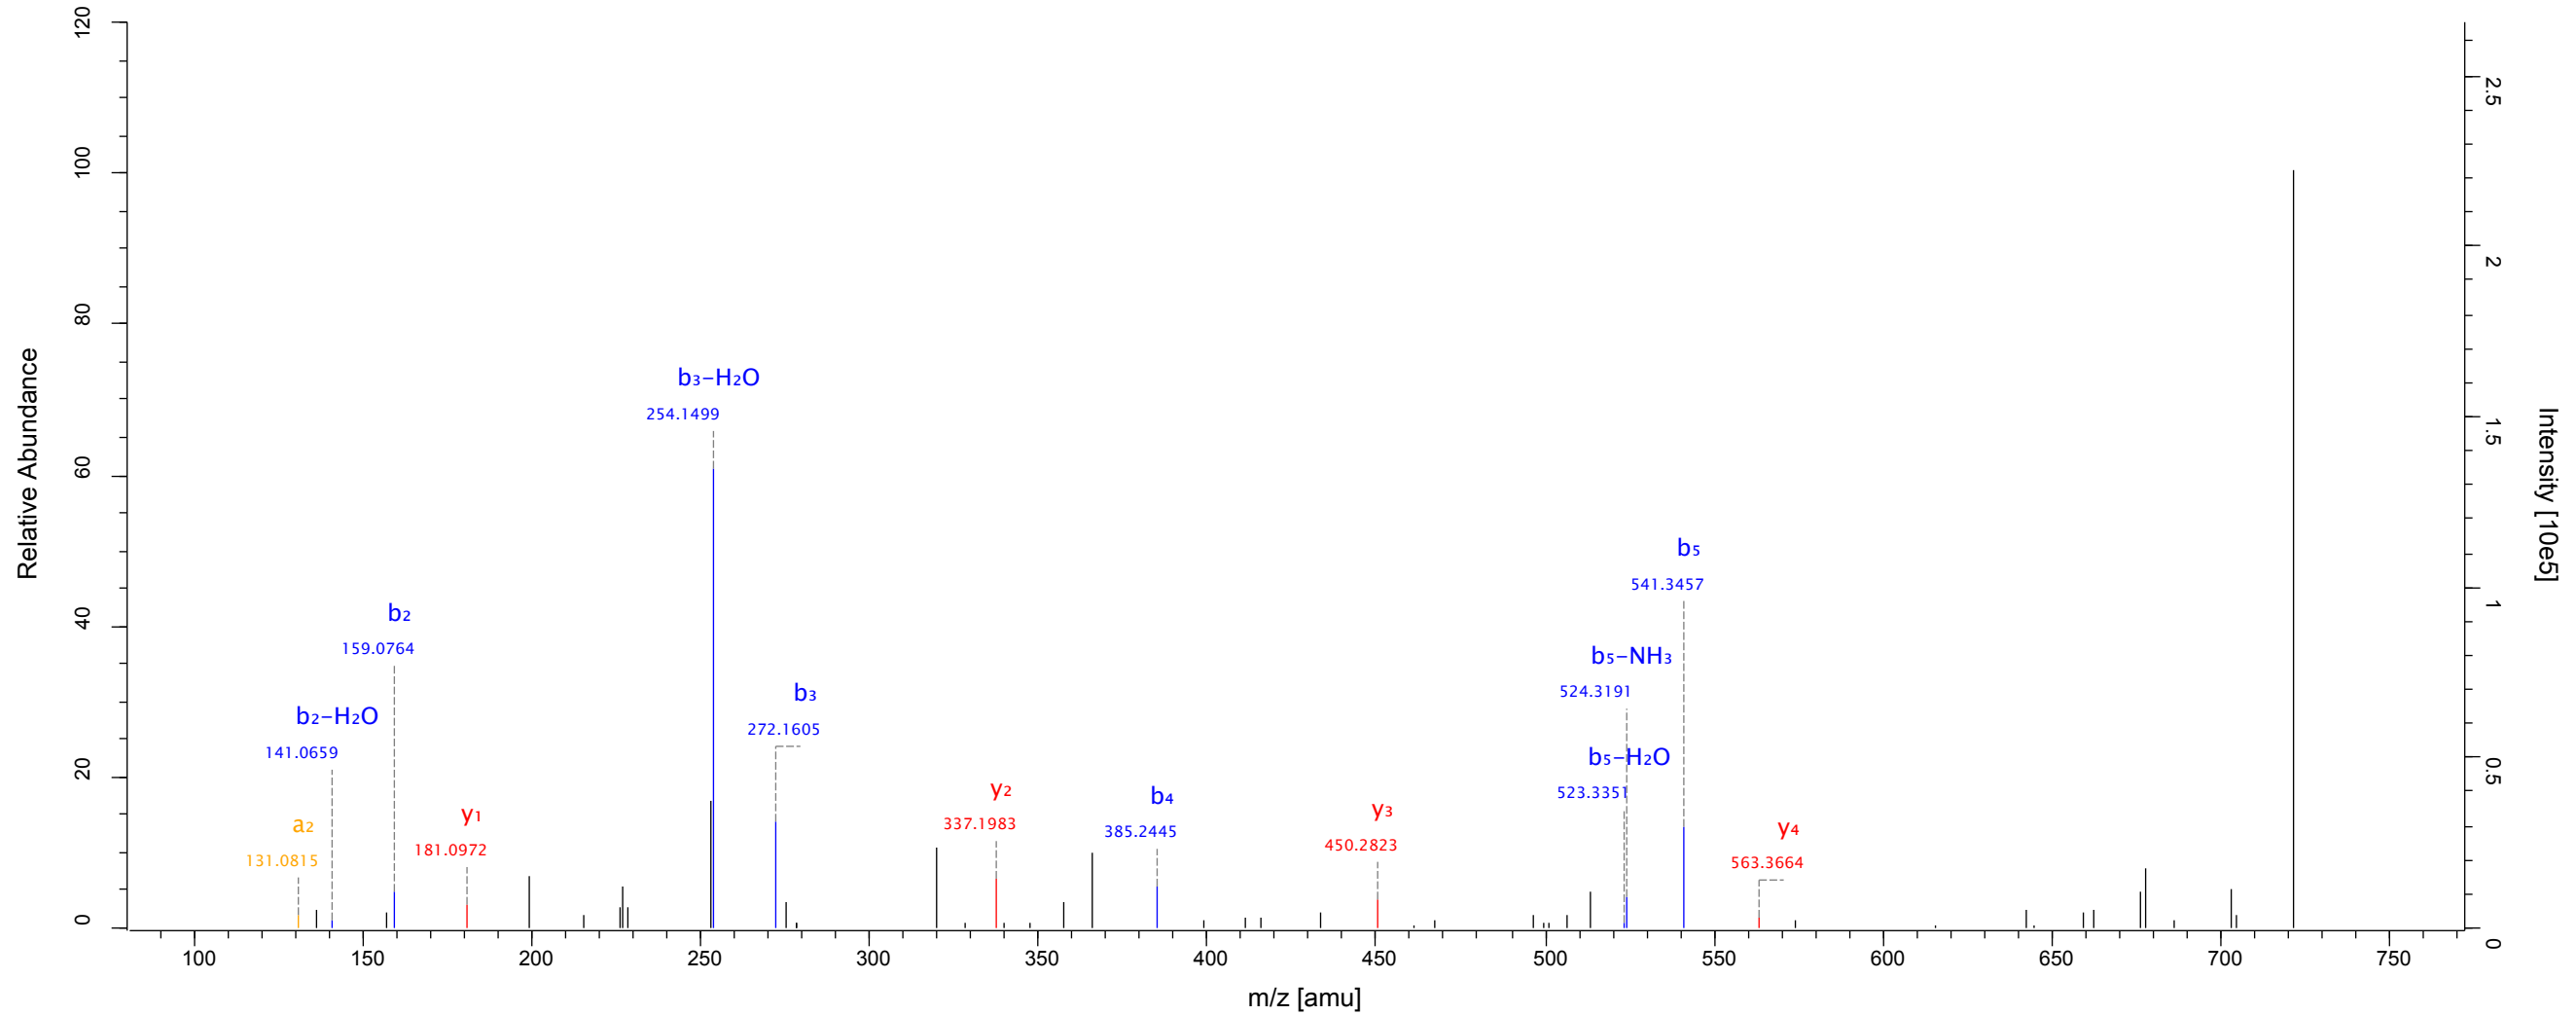

# peptide ID 9

Source: 20120816\_CO\_0340Gaje\_R02  
Scannumber: 16365  
Protein: pep\_174; pep\_secretome\_23345; pep\_secretome\_479  
Peptide Score: 78.69  
Method: FTMS; HCD; 1

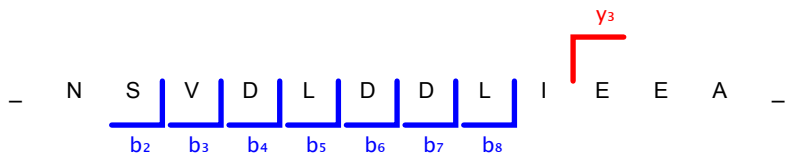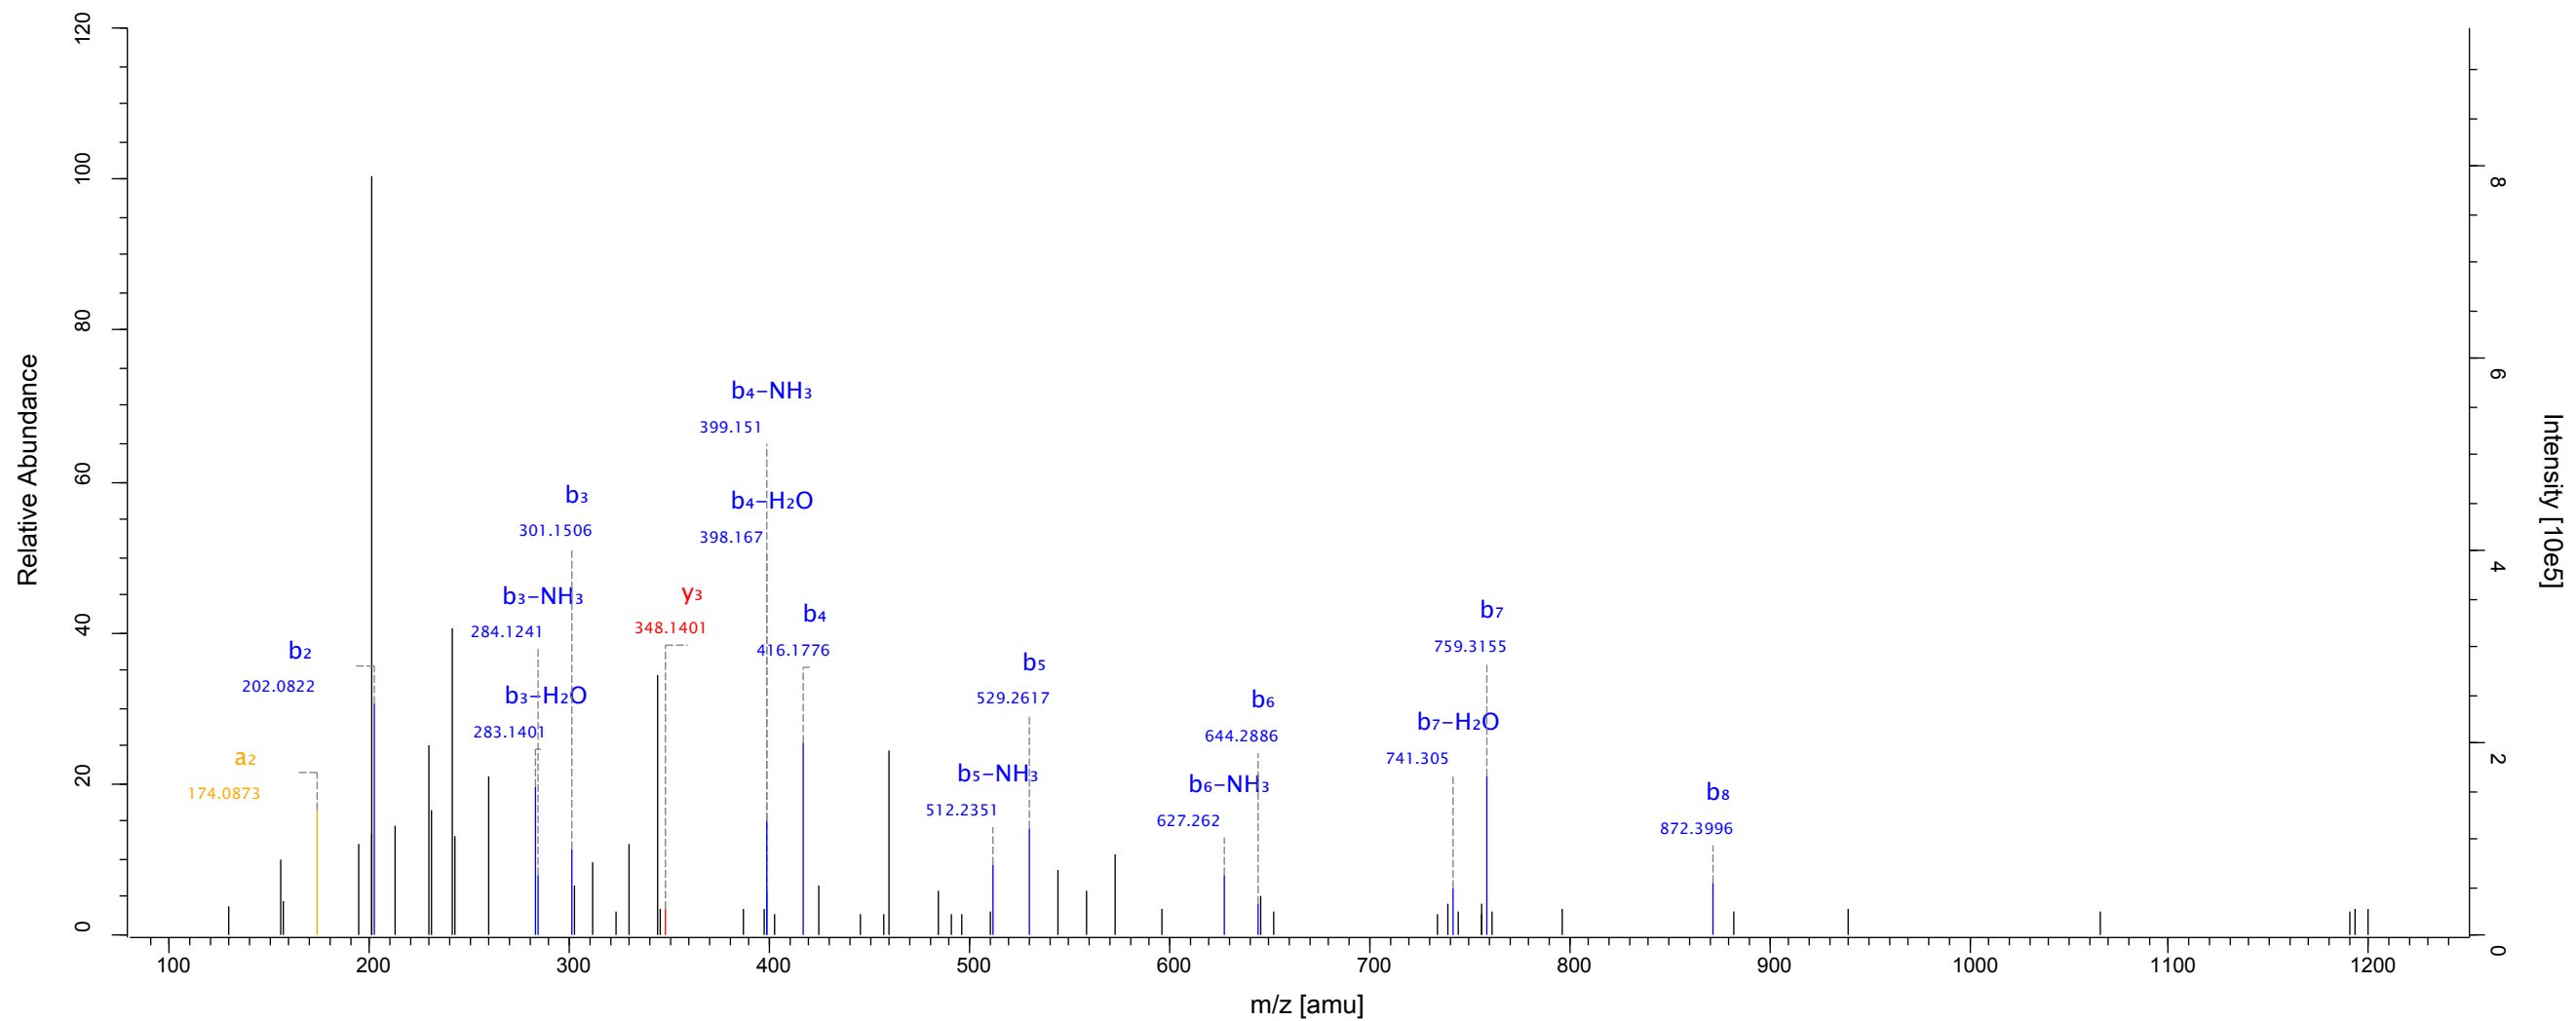

# peptide ID 10

Source: 20120816\_CO\_0340Gaje\_R02  
Scannumber: 14110  
Protein: orf\_11768; orf\_7289; pep\_secretome\_480  
Peptide Score: 70.2  
Method: FTMS; HCD; 1

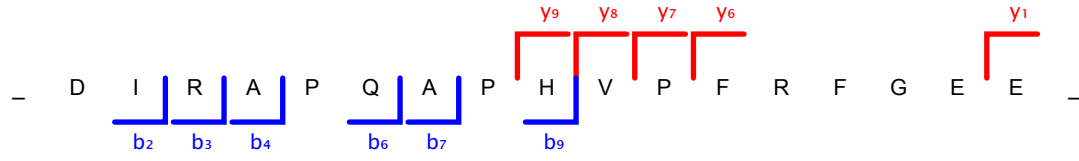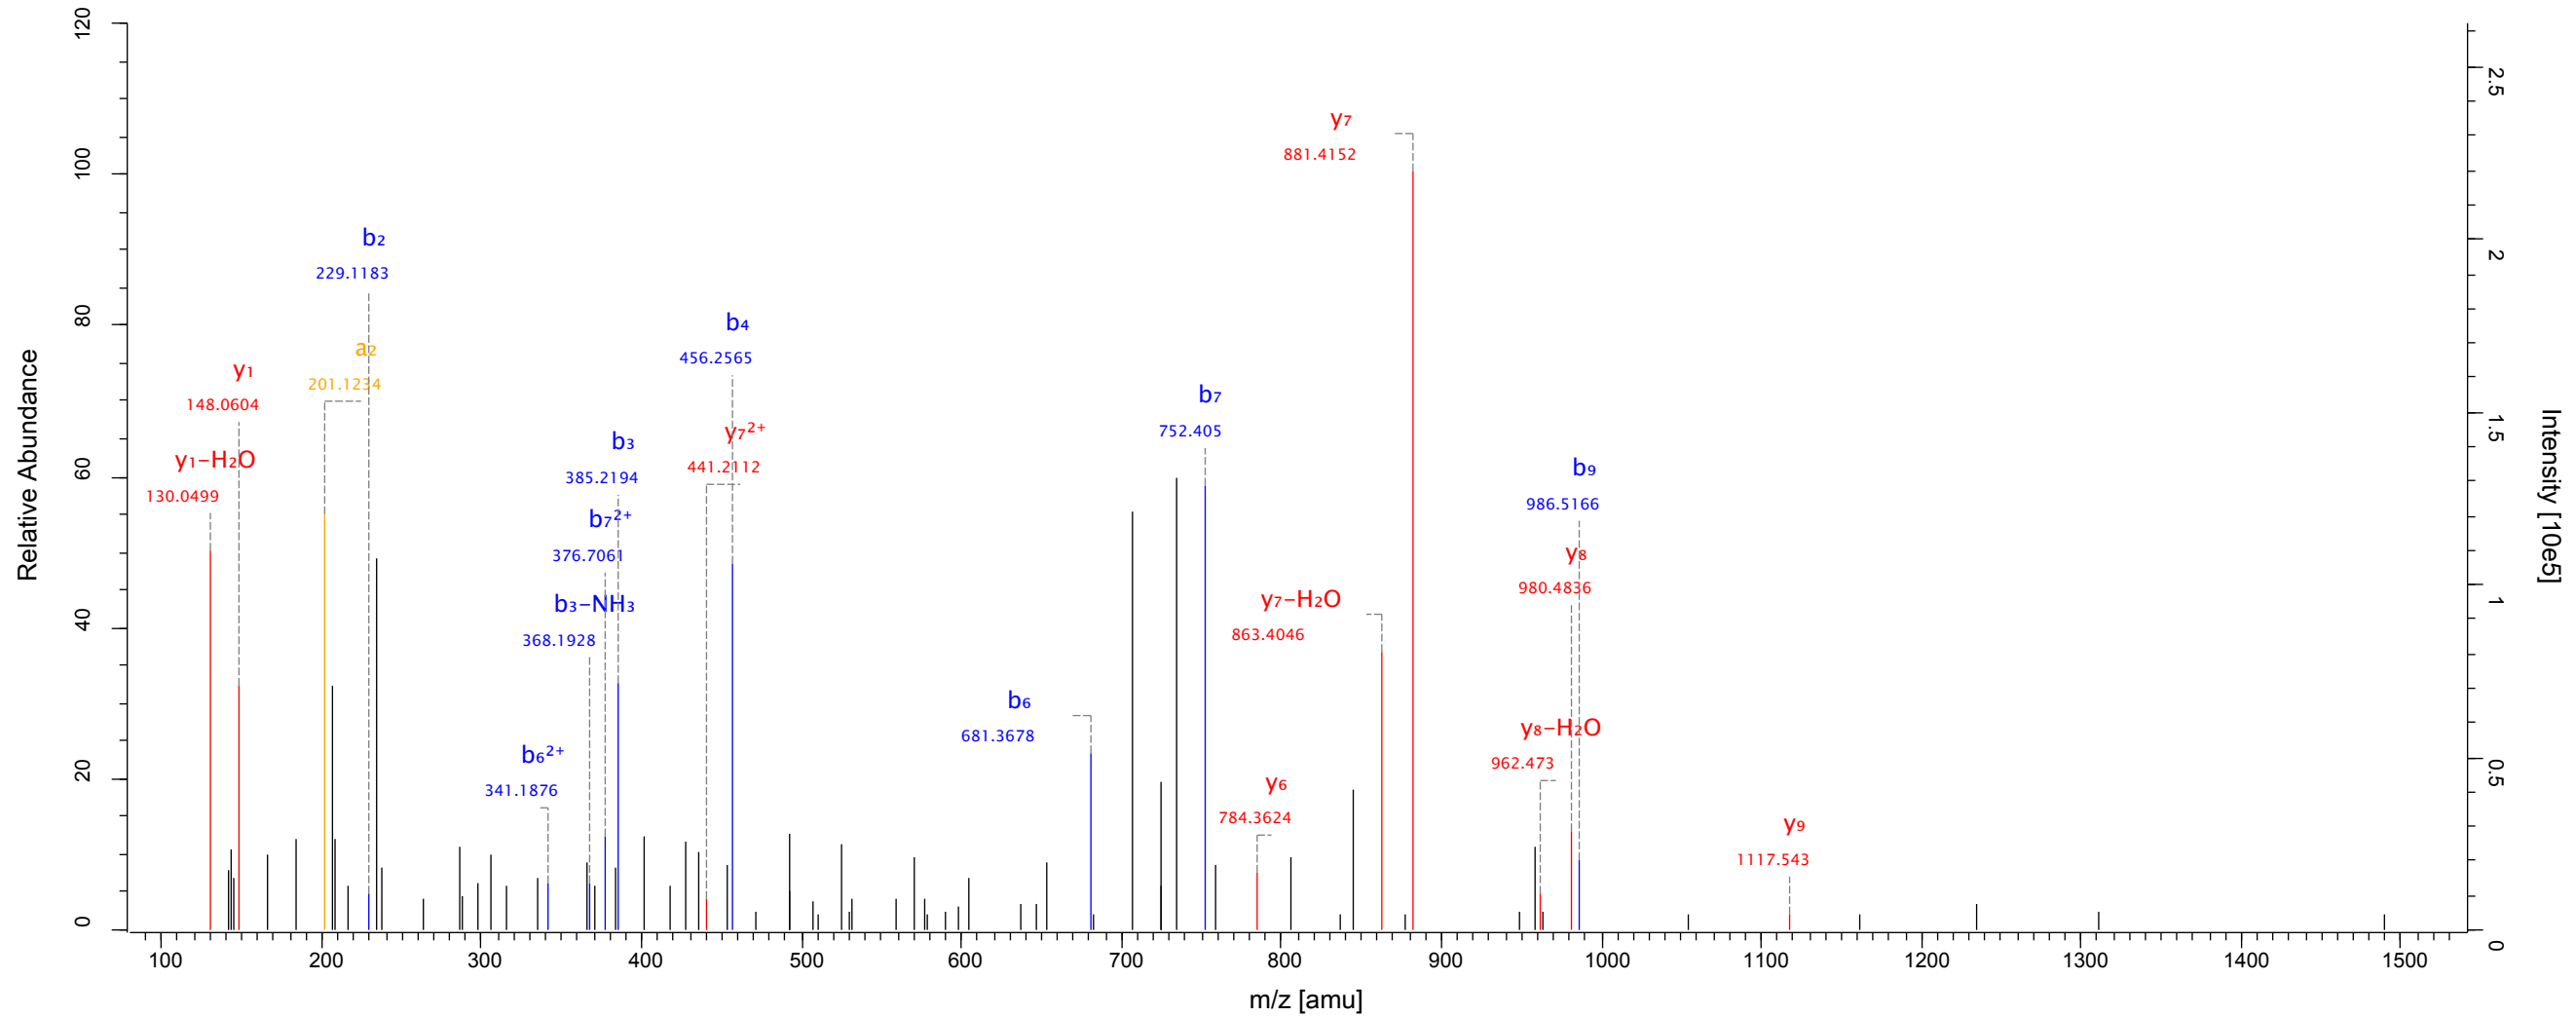

# peptide ID 11

Source: 20120816\_CO\_0340Gaje\_R02  
Scannumber: 12502  
Protein: orf\_11768; orf\_7289; pep\_secretome\_480  
Peptide Score: 72.5  
Method: FTMS; HCD; 1

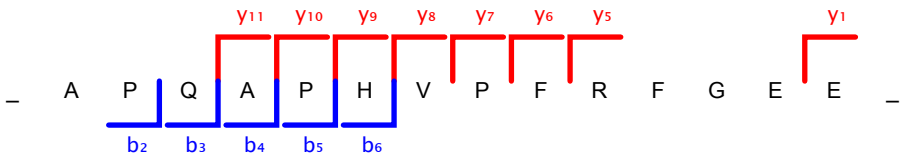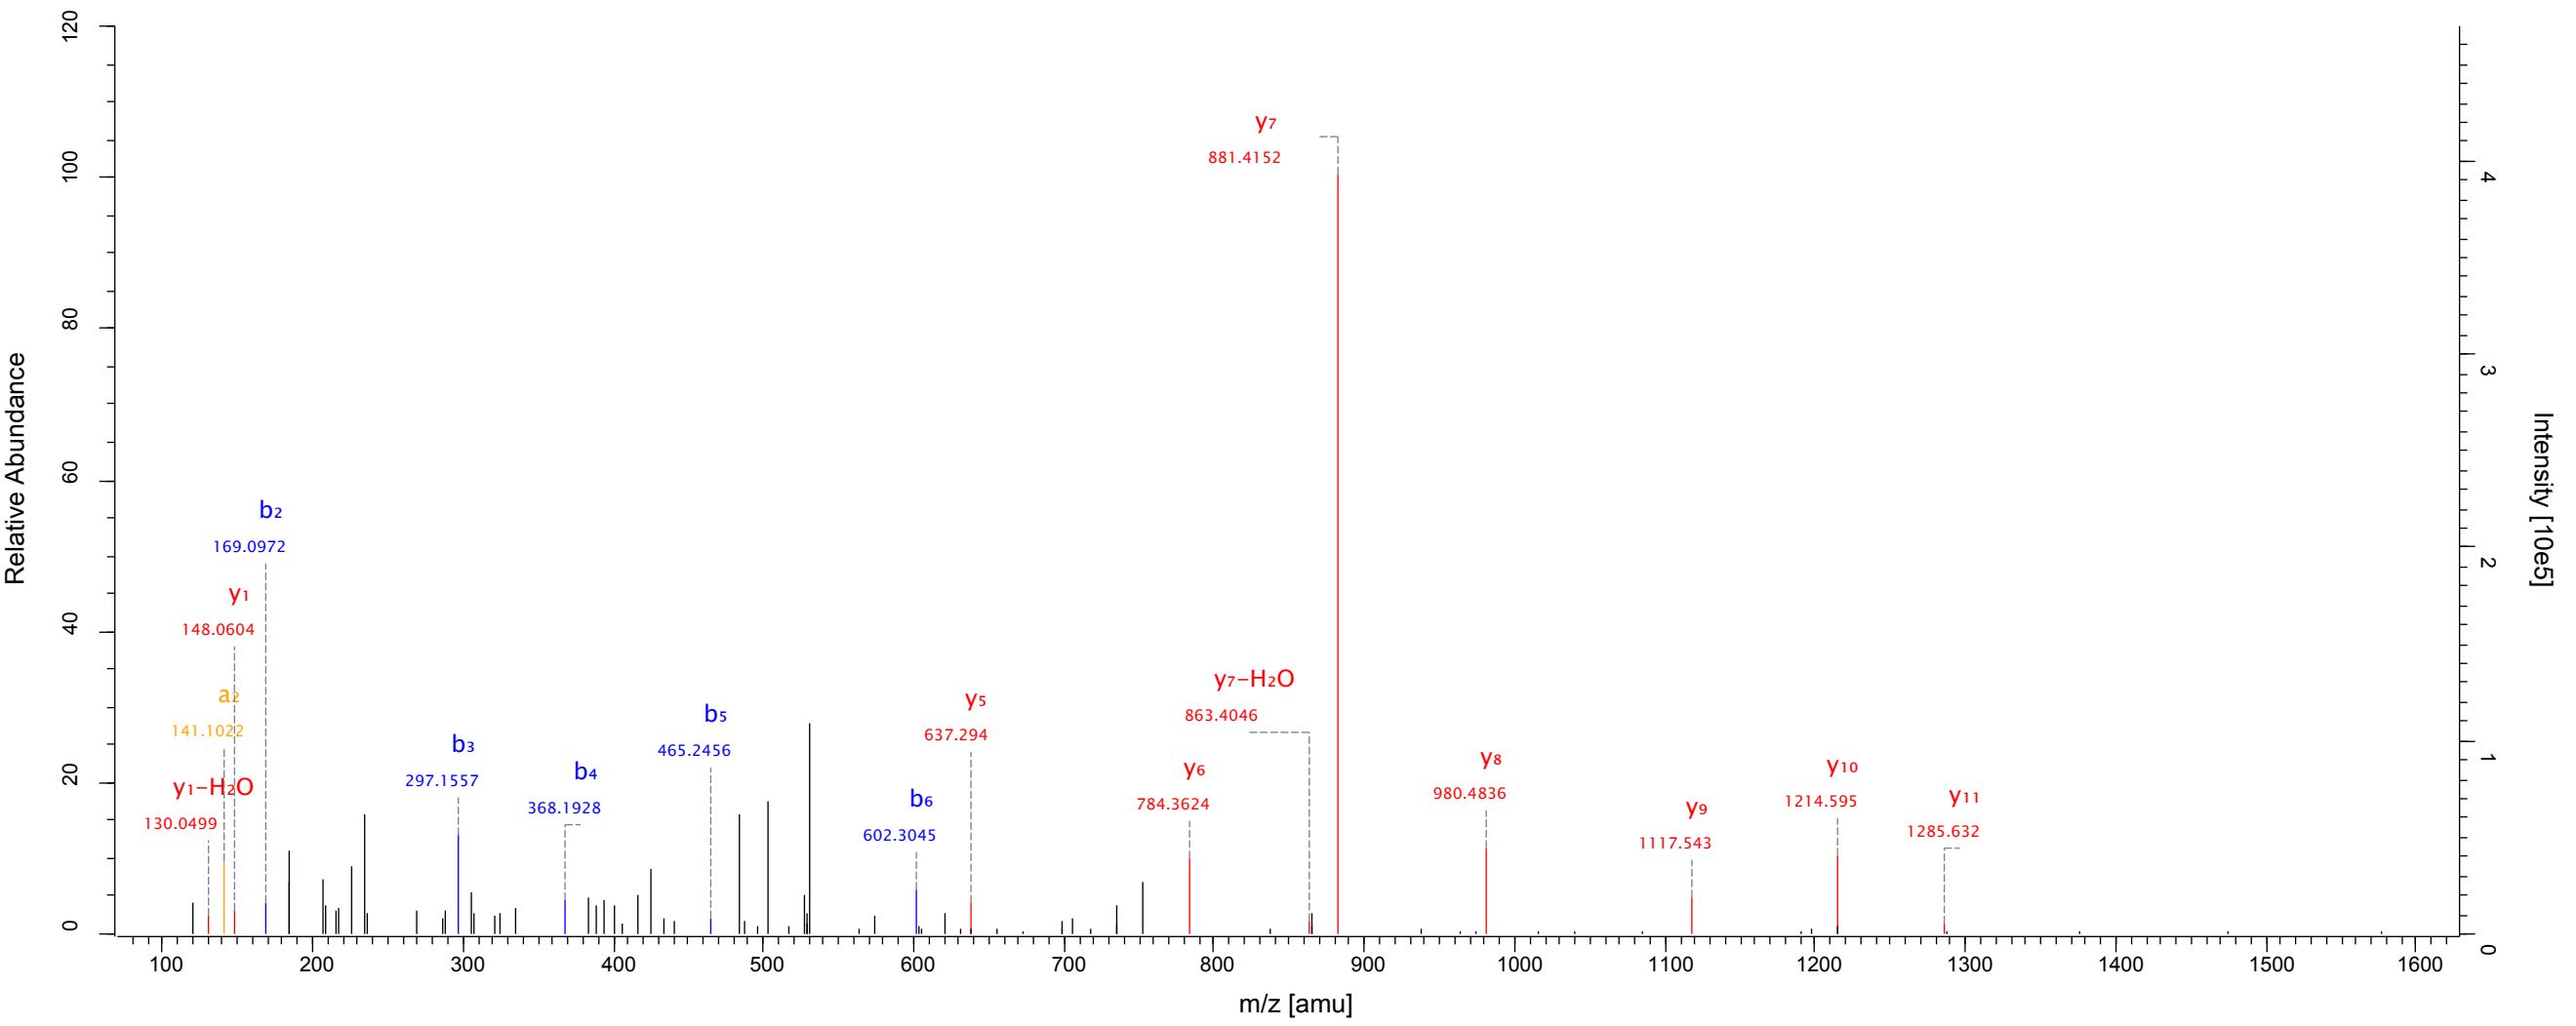

# peptide ID 12

Source: 20120515\_CO\_0340Gaje\_R01  
Scannumber: 13383  
Protein: pep\_166; pep\_secretome\_451  
Peptide Score: 73.47  
Method: FTMS; HCD; 1

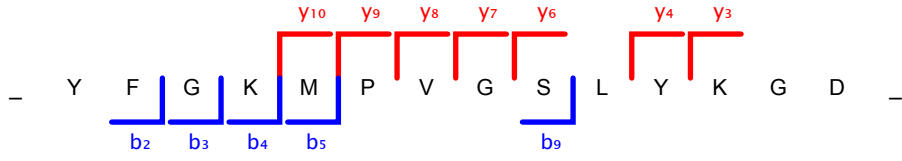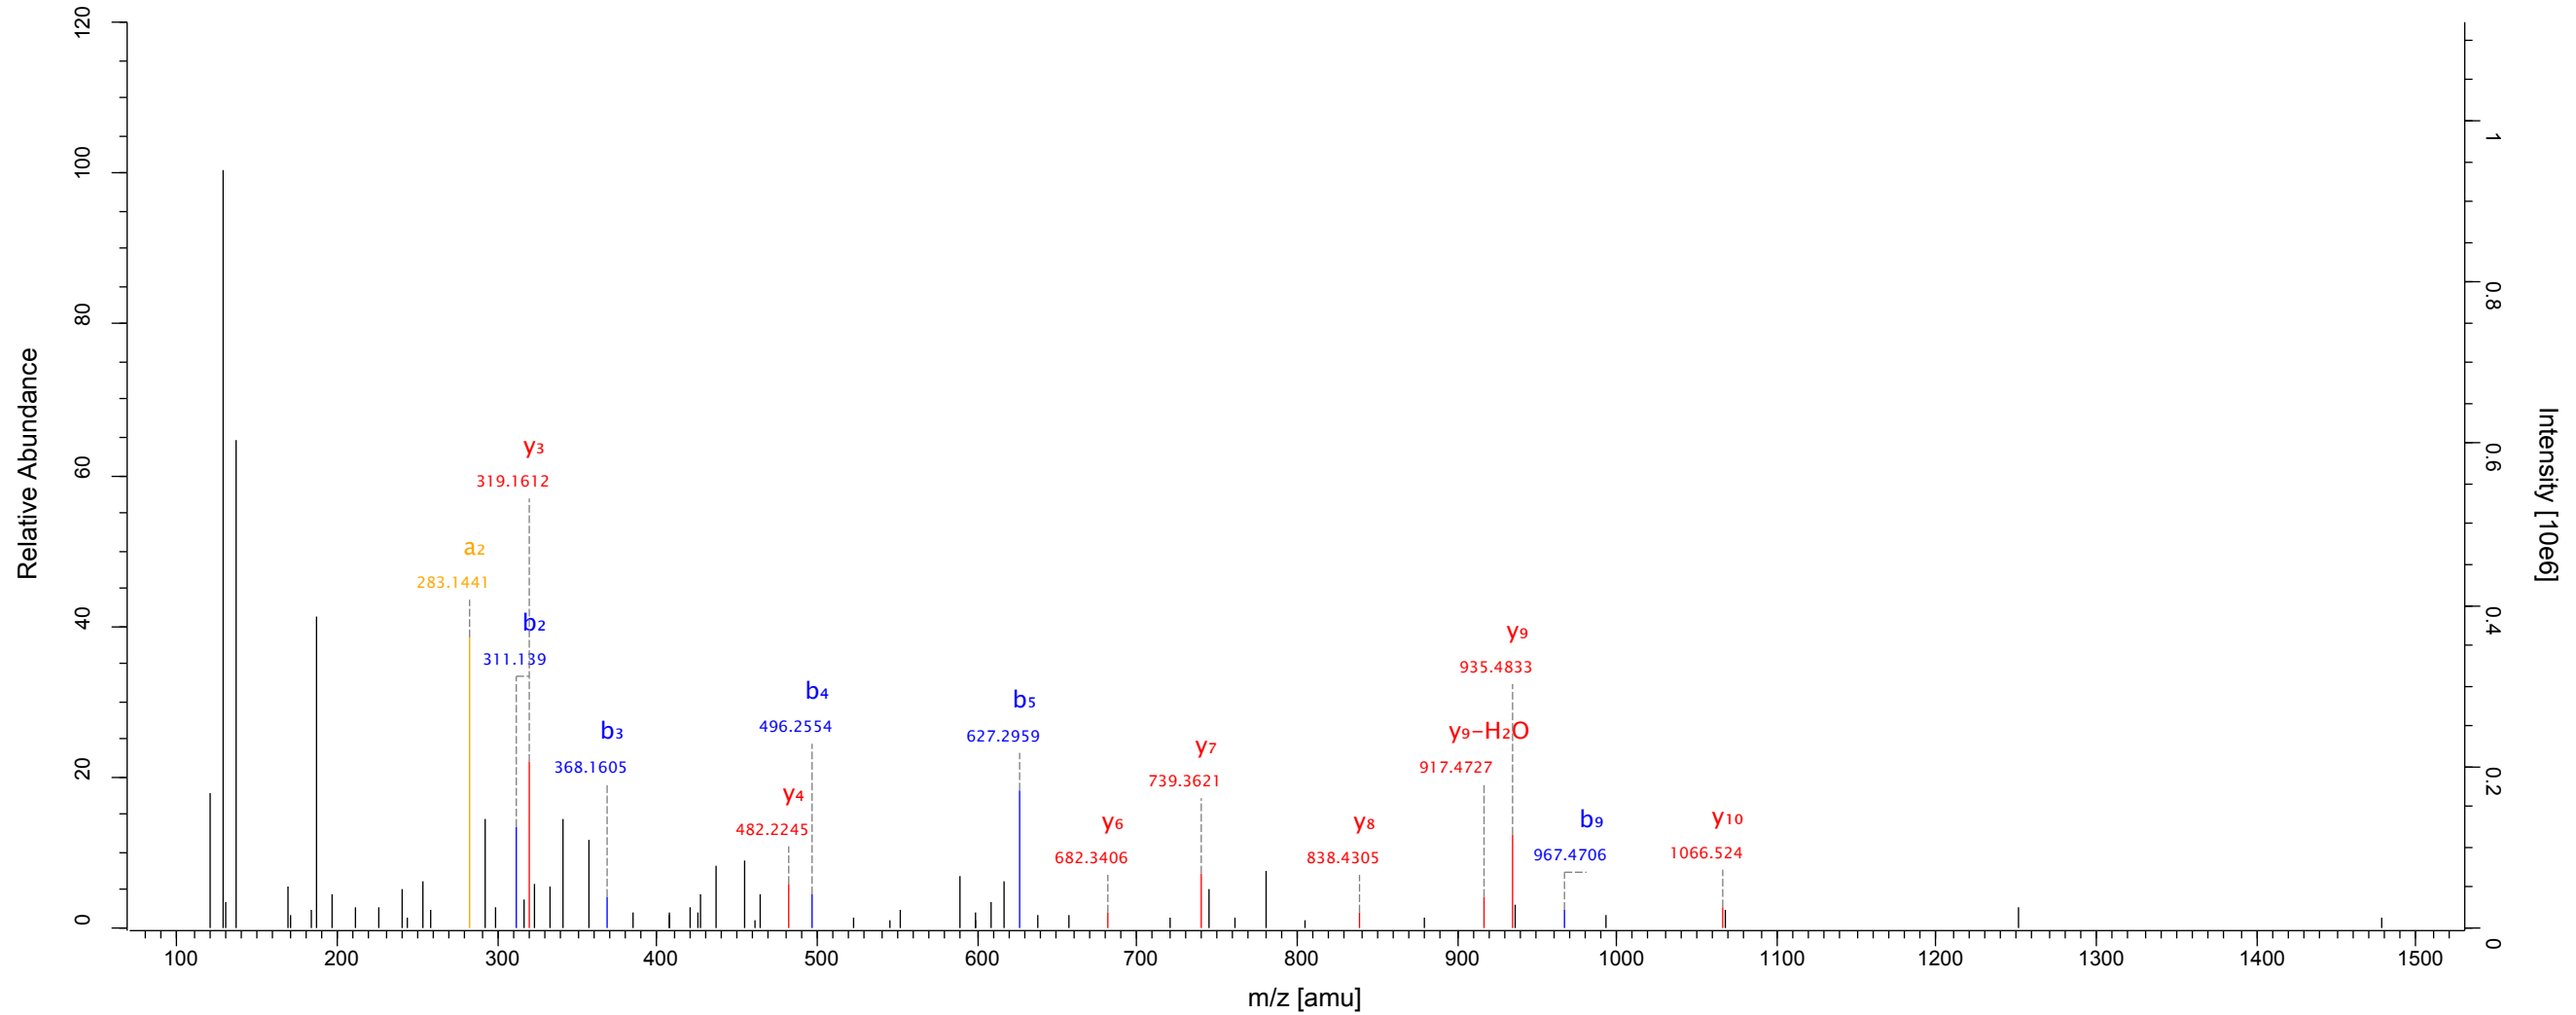



# peptide ID 13

Source: 20121106\_CO\_0340Gaje\_R02\_2  
Scannumber: 13490  
Protein: pep\_86; pep\_secretome\_205; pep\_secretome\_22883  
Peptide Score: 90.73  
Method: FTMS; HCD; 1

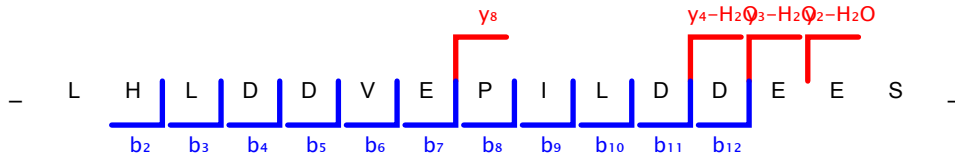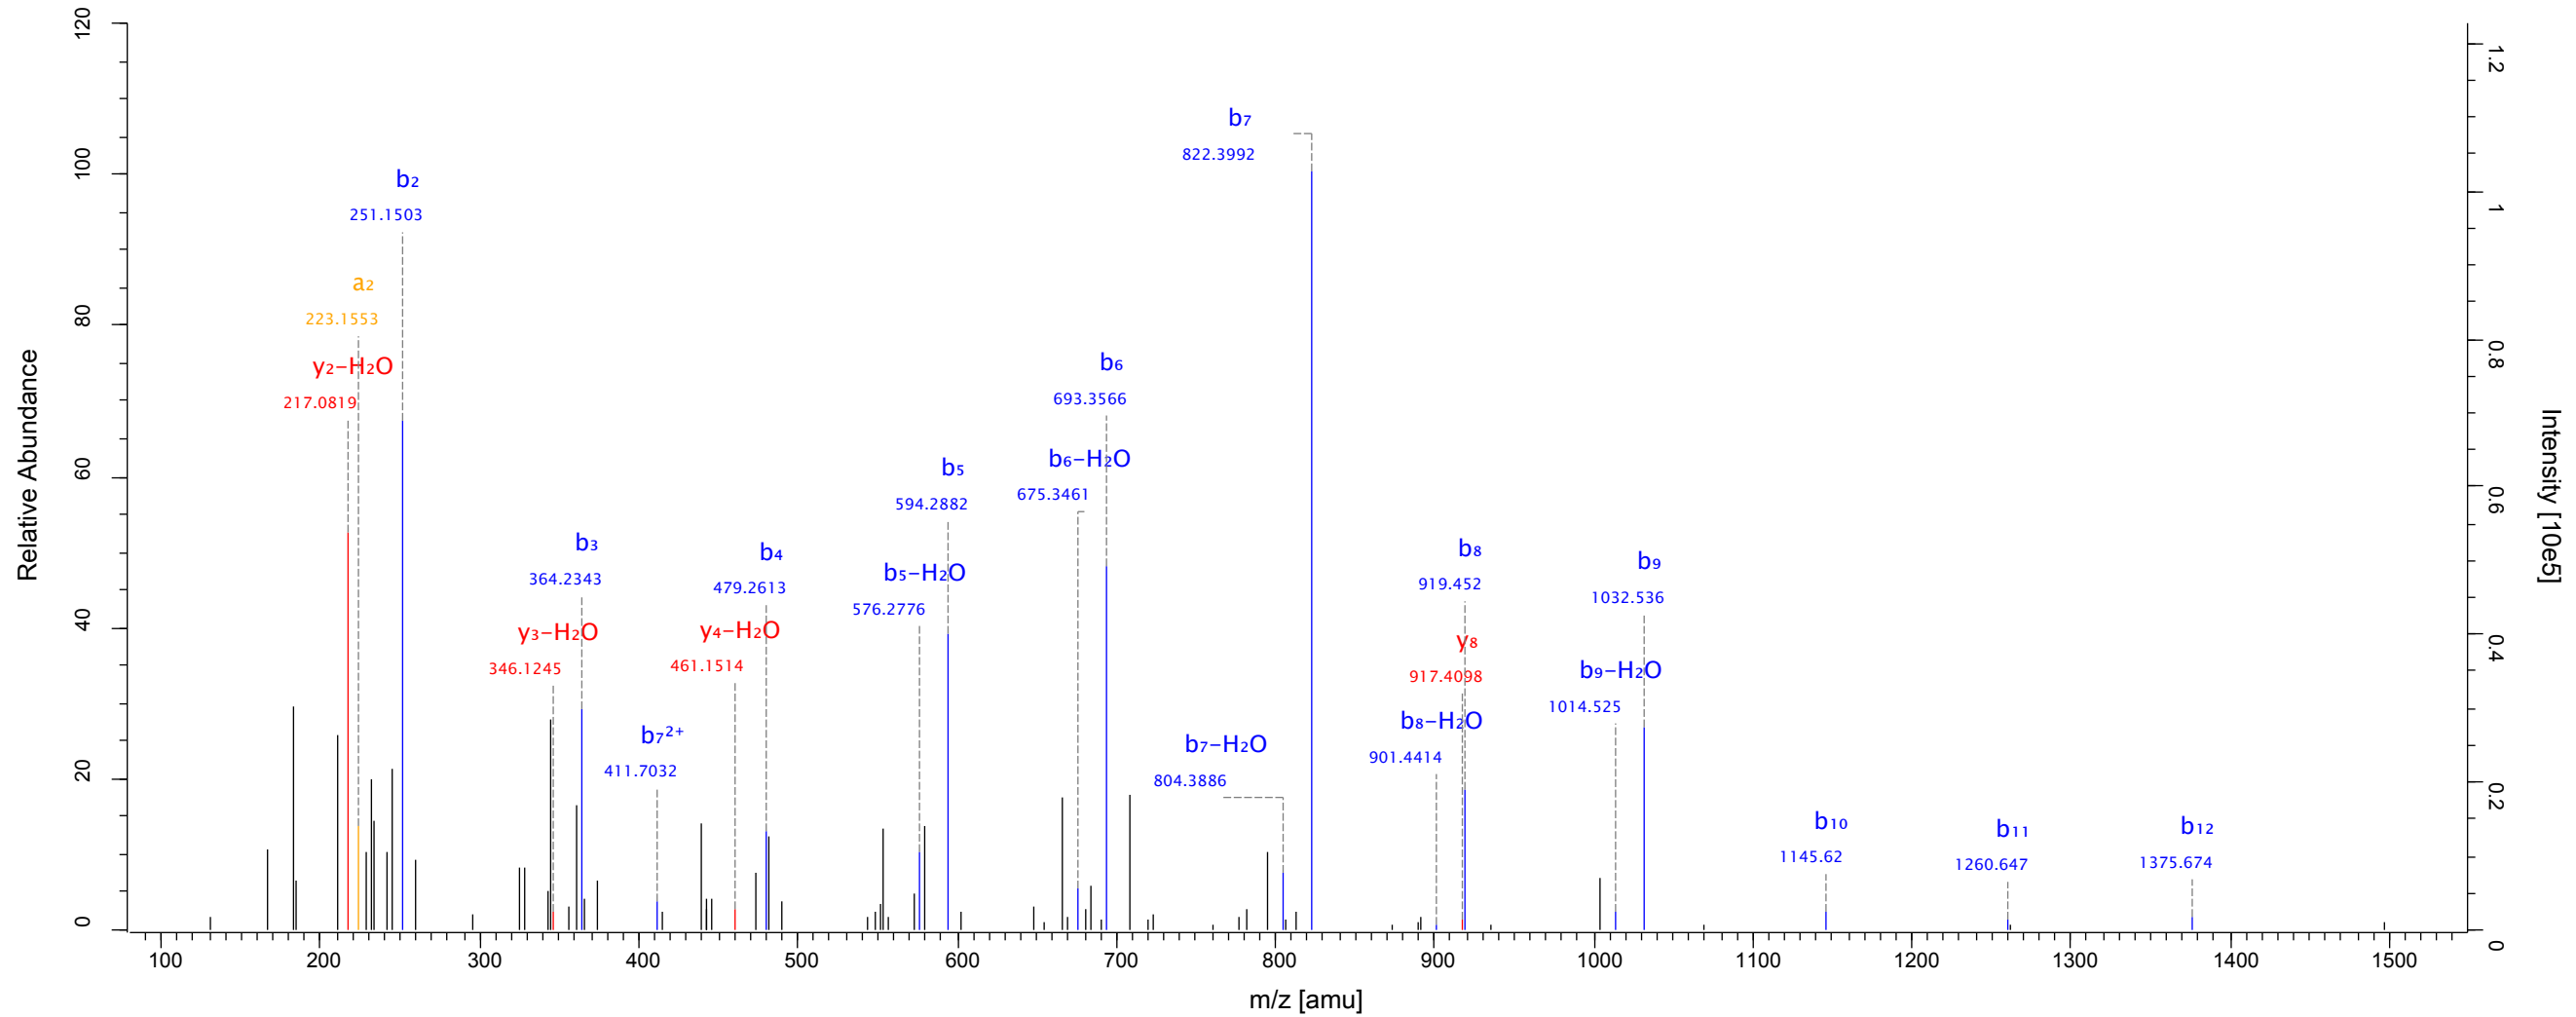

# peptide ID 14

Source: 20120816\_CO\_0340Gaje\_R02  
Scannumber: 8498  
Protein: pep\_93; pep\_secretome\_213; pep\_secretome\_22908  
Peptide Score: 85.81  
Method: FTMS; HCD; 1

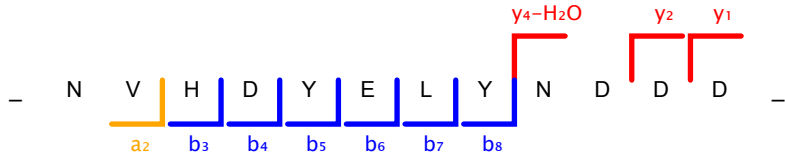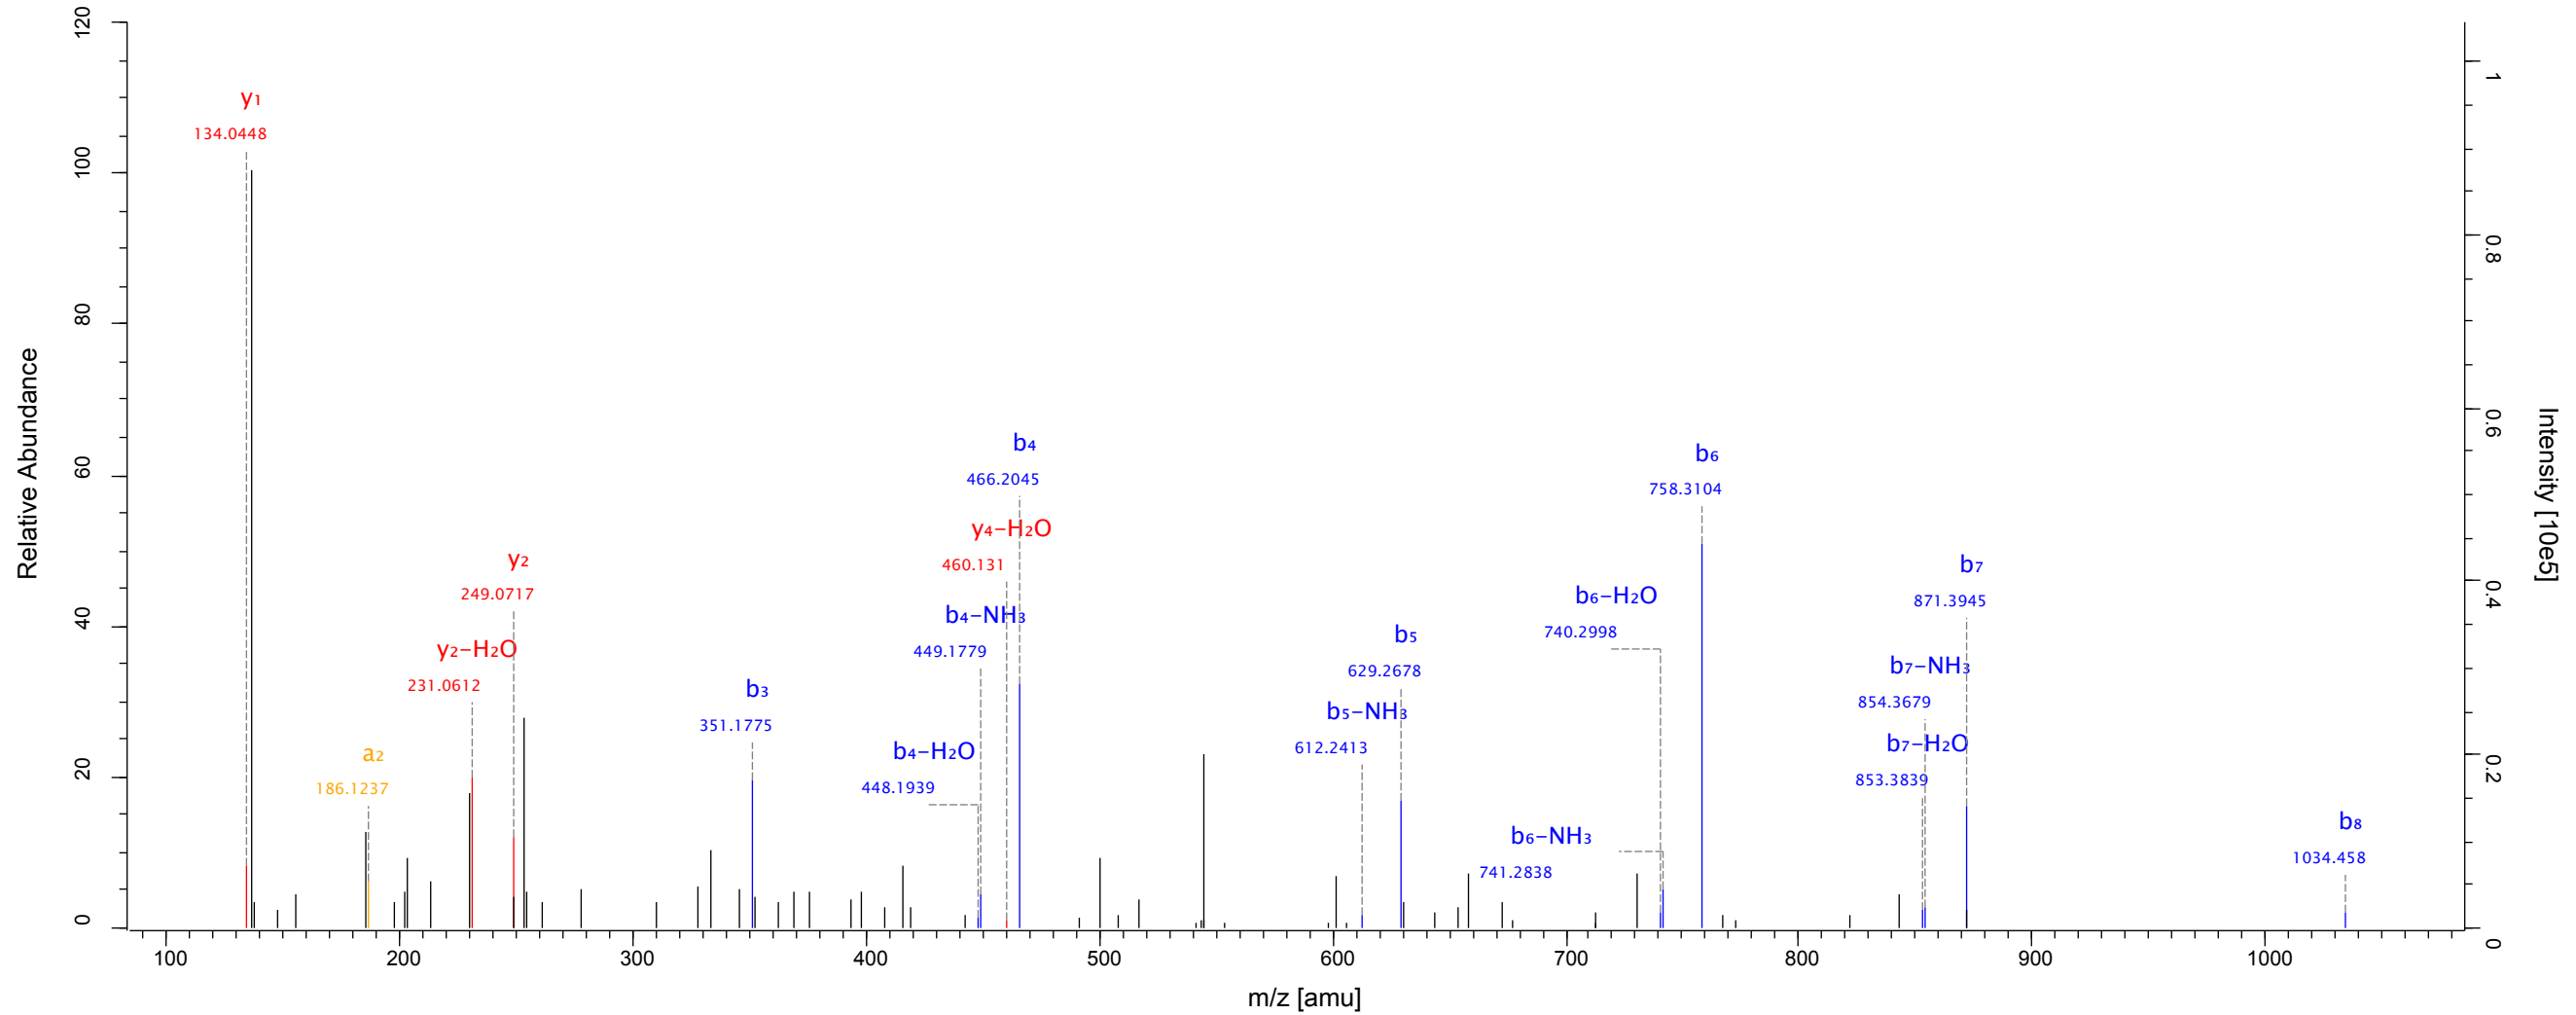

# peptide ID 15

Source: 20121106\_CO\_0340Gaje\_R02\_2  
Scannumber: 10723  
Protein: pep\_95; pep\_secretome\_216  
Peptide Score: 85.38  
Method: FTMS; HCD; 1

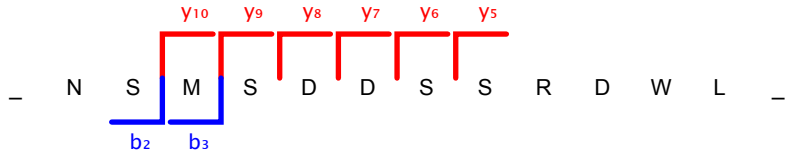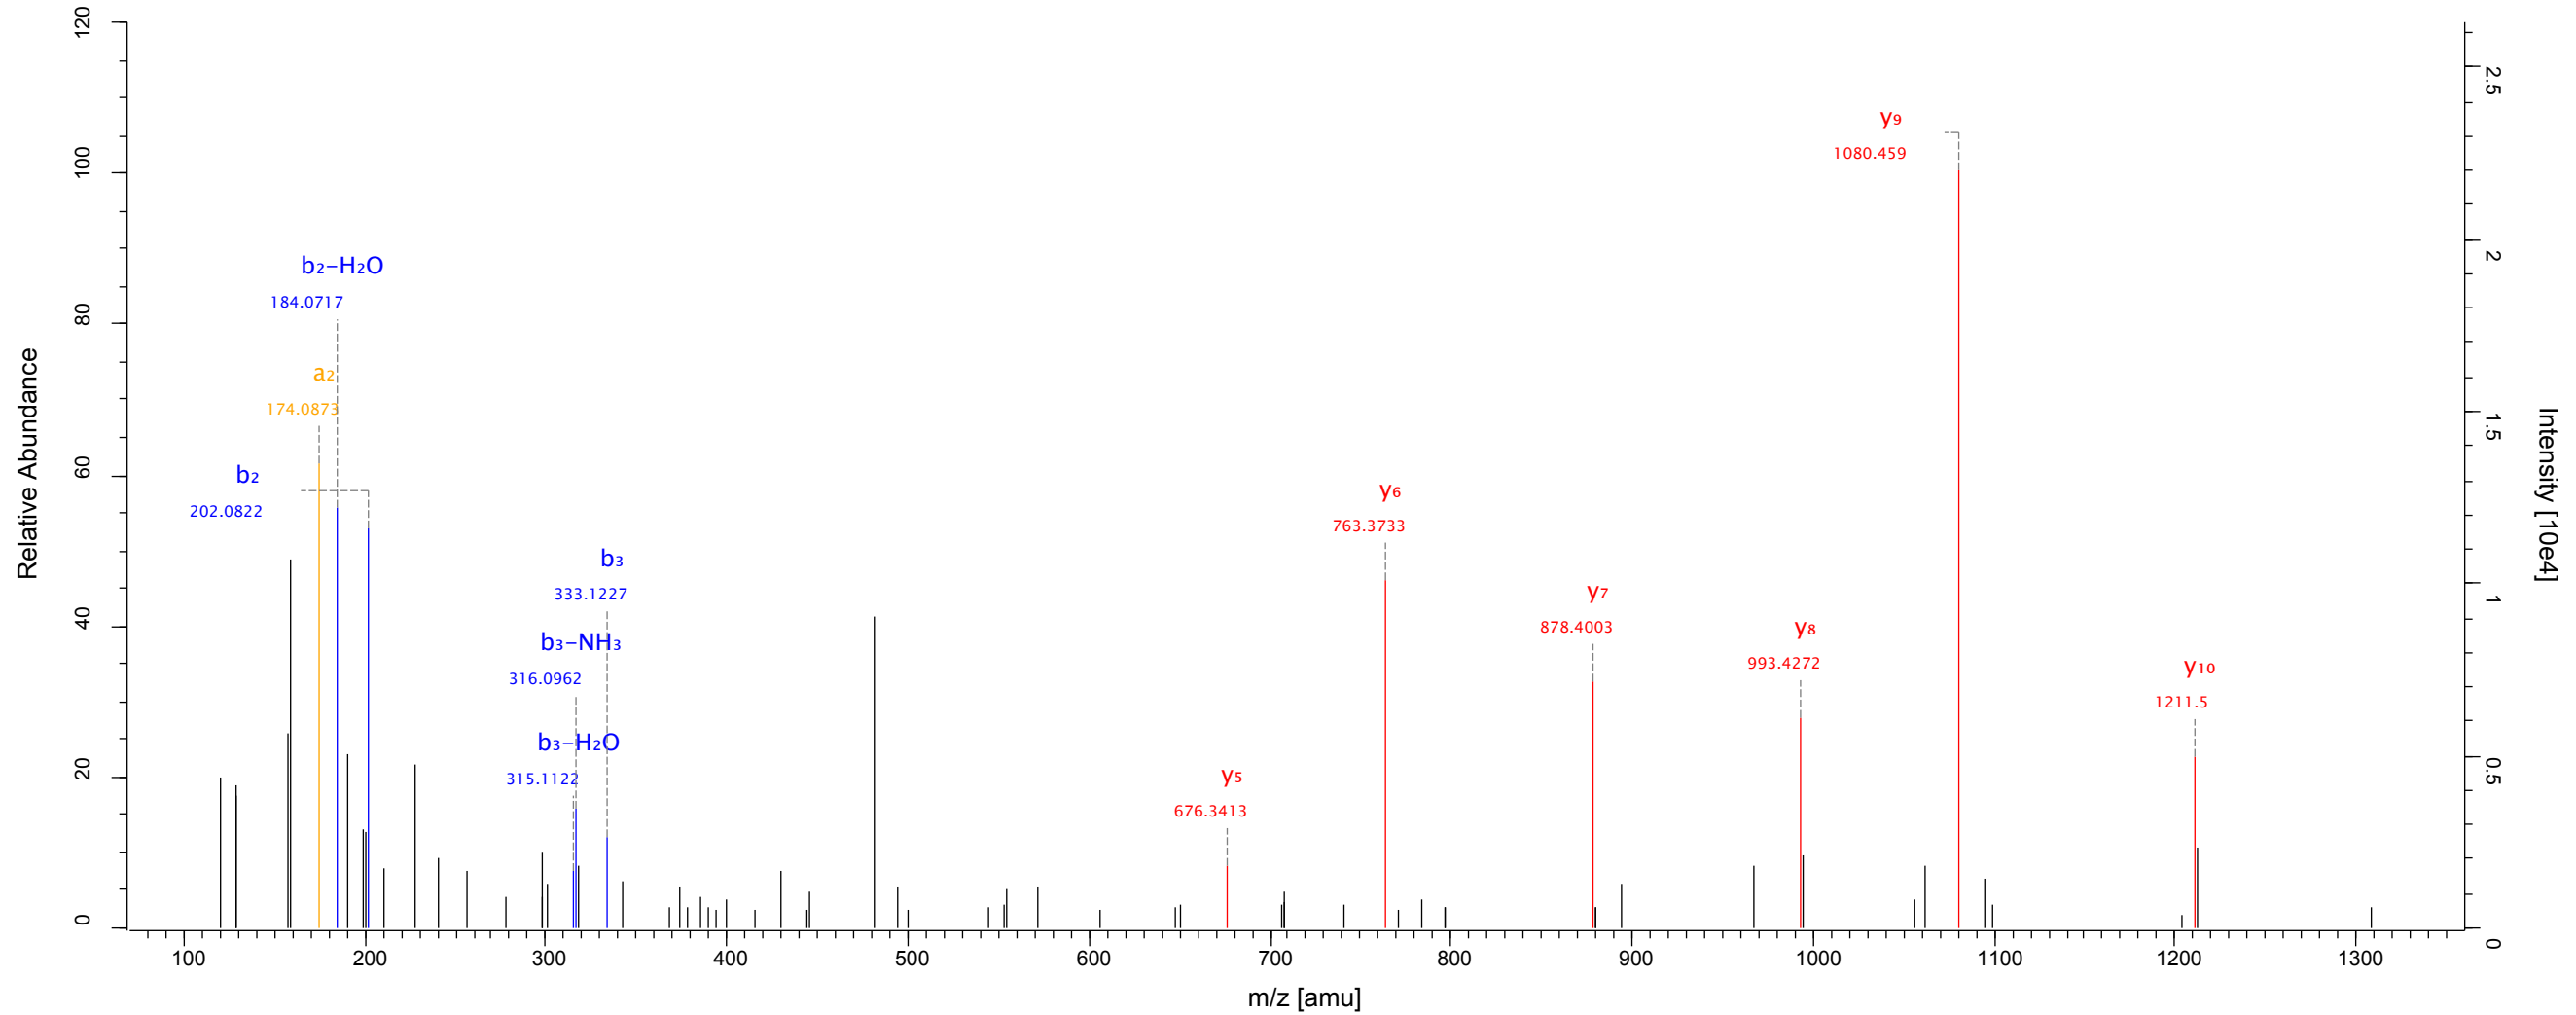

# peptide ID 16

Source: 20120816\_CO\_0340Gaje\_R02  
Scannumber: 9950  
Protein: pep\_95; pep\_secretome\_216  
Peptide Score: 79.97  
Method: FTMS; HCD; 1

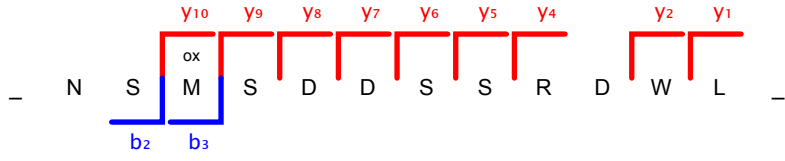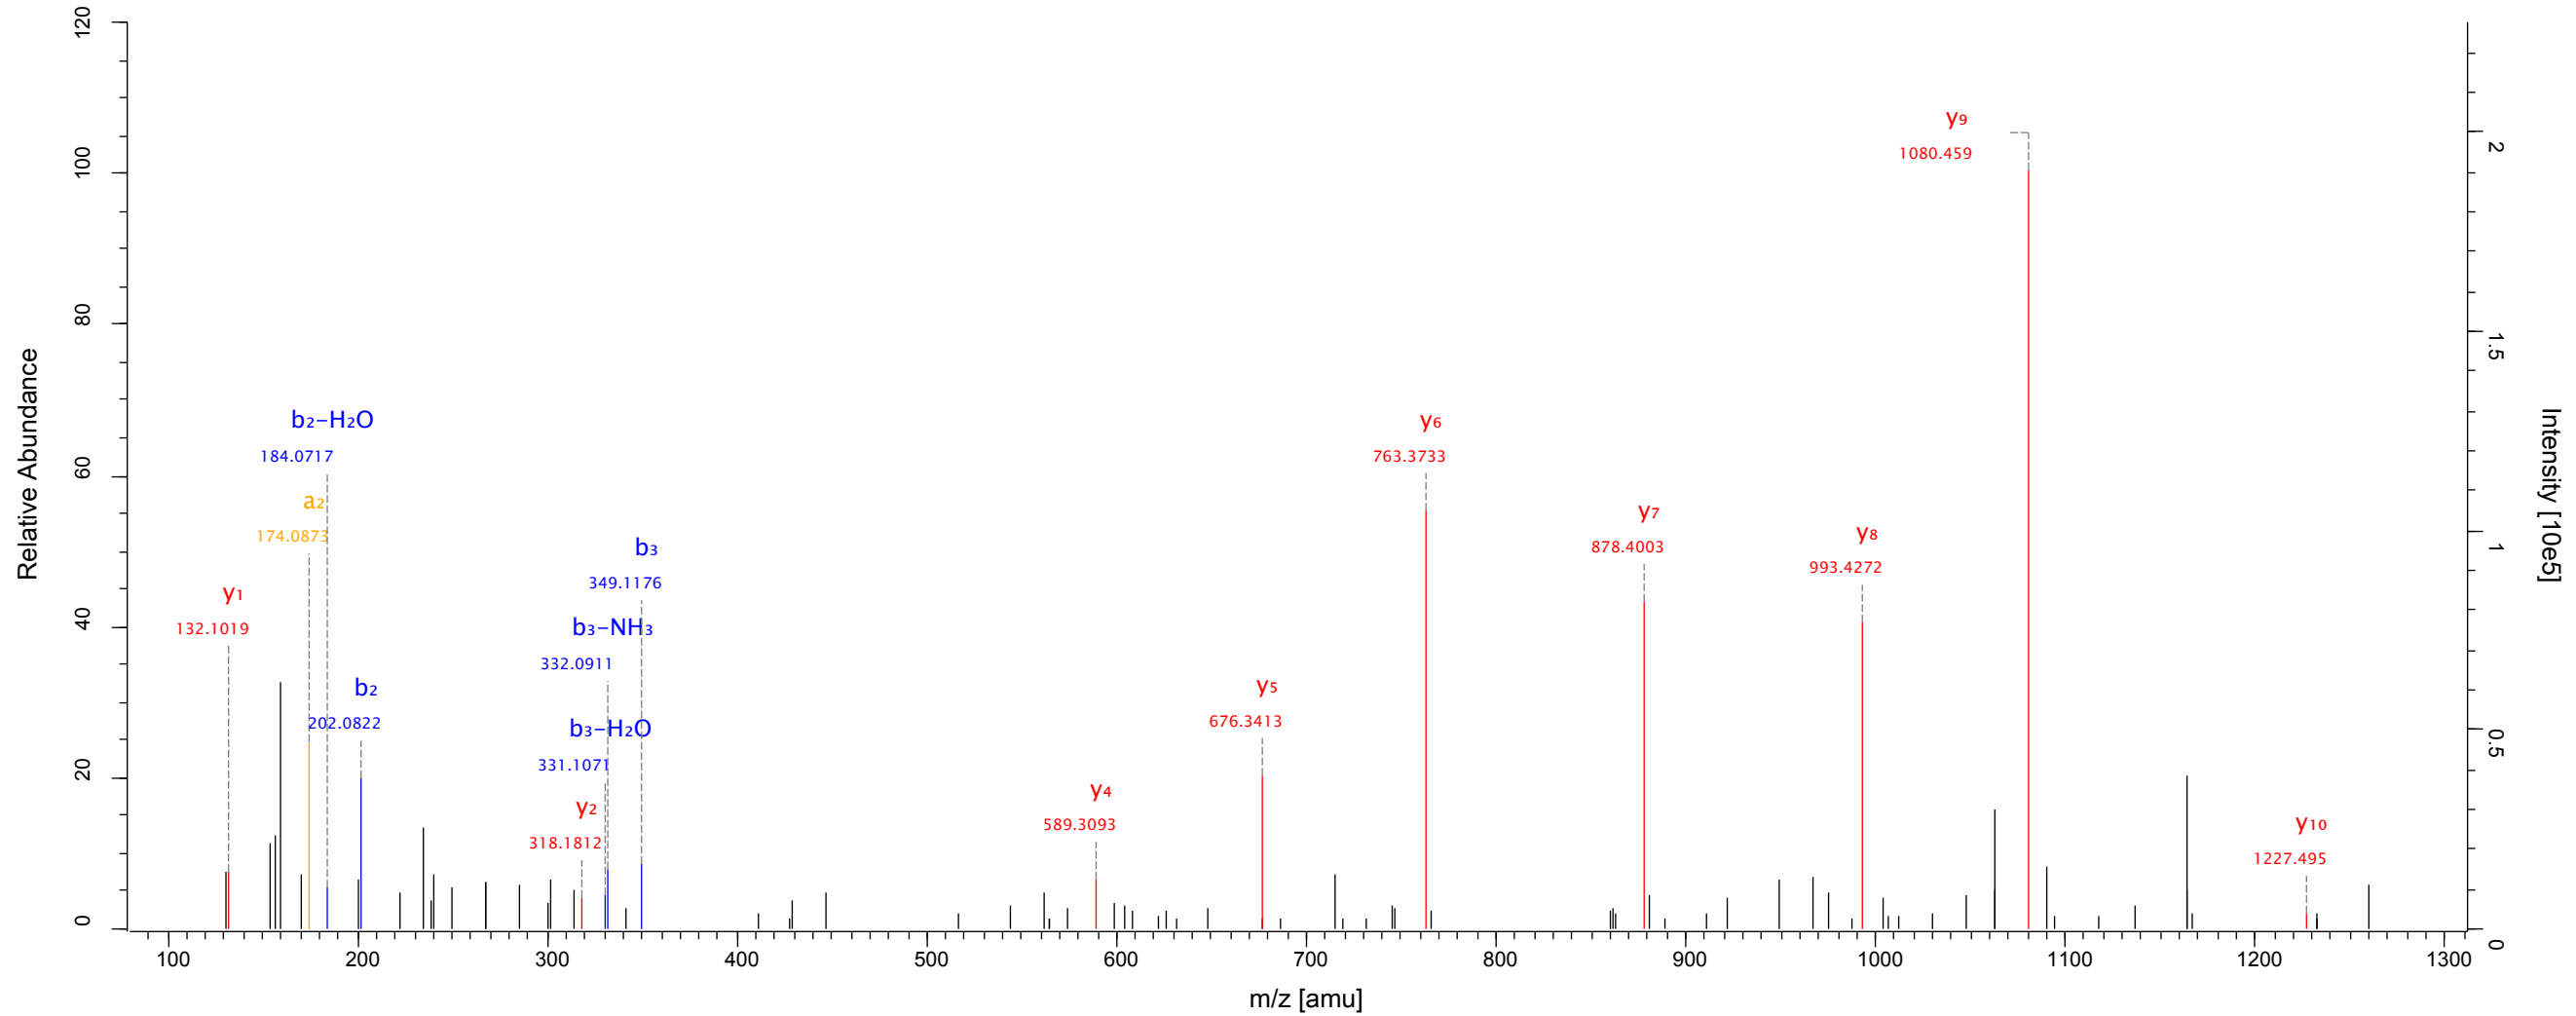

# peptide ID 17

Source: 20120816\_CO\_0340Gaje\_R02  
Scannumber: 11791  
Protein: pep\_100; pep\_secretome\_225; pep\_secretome\_22921  
Peptide Score: 70.96  
Method: FTMS; HCD; 1

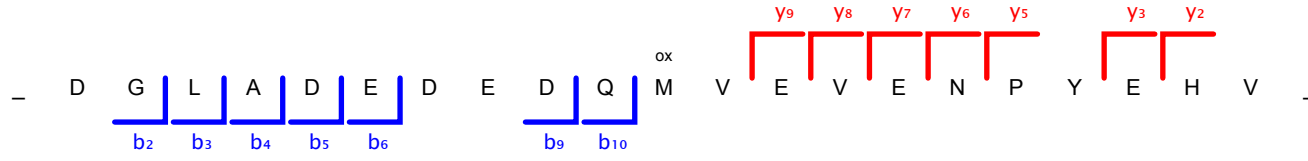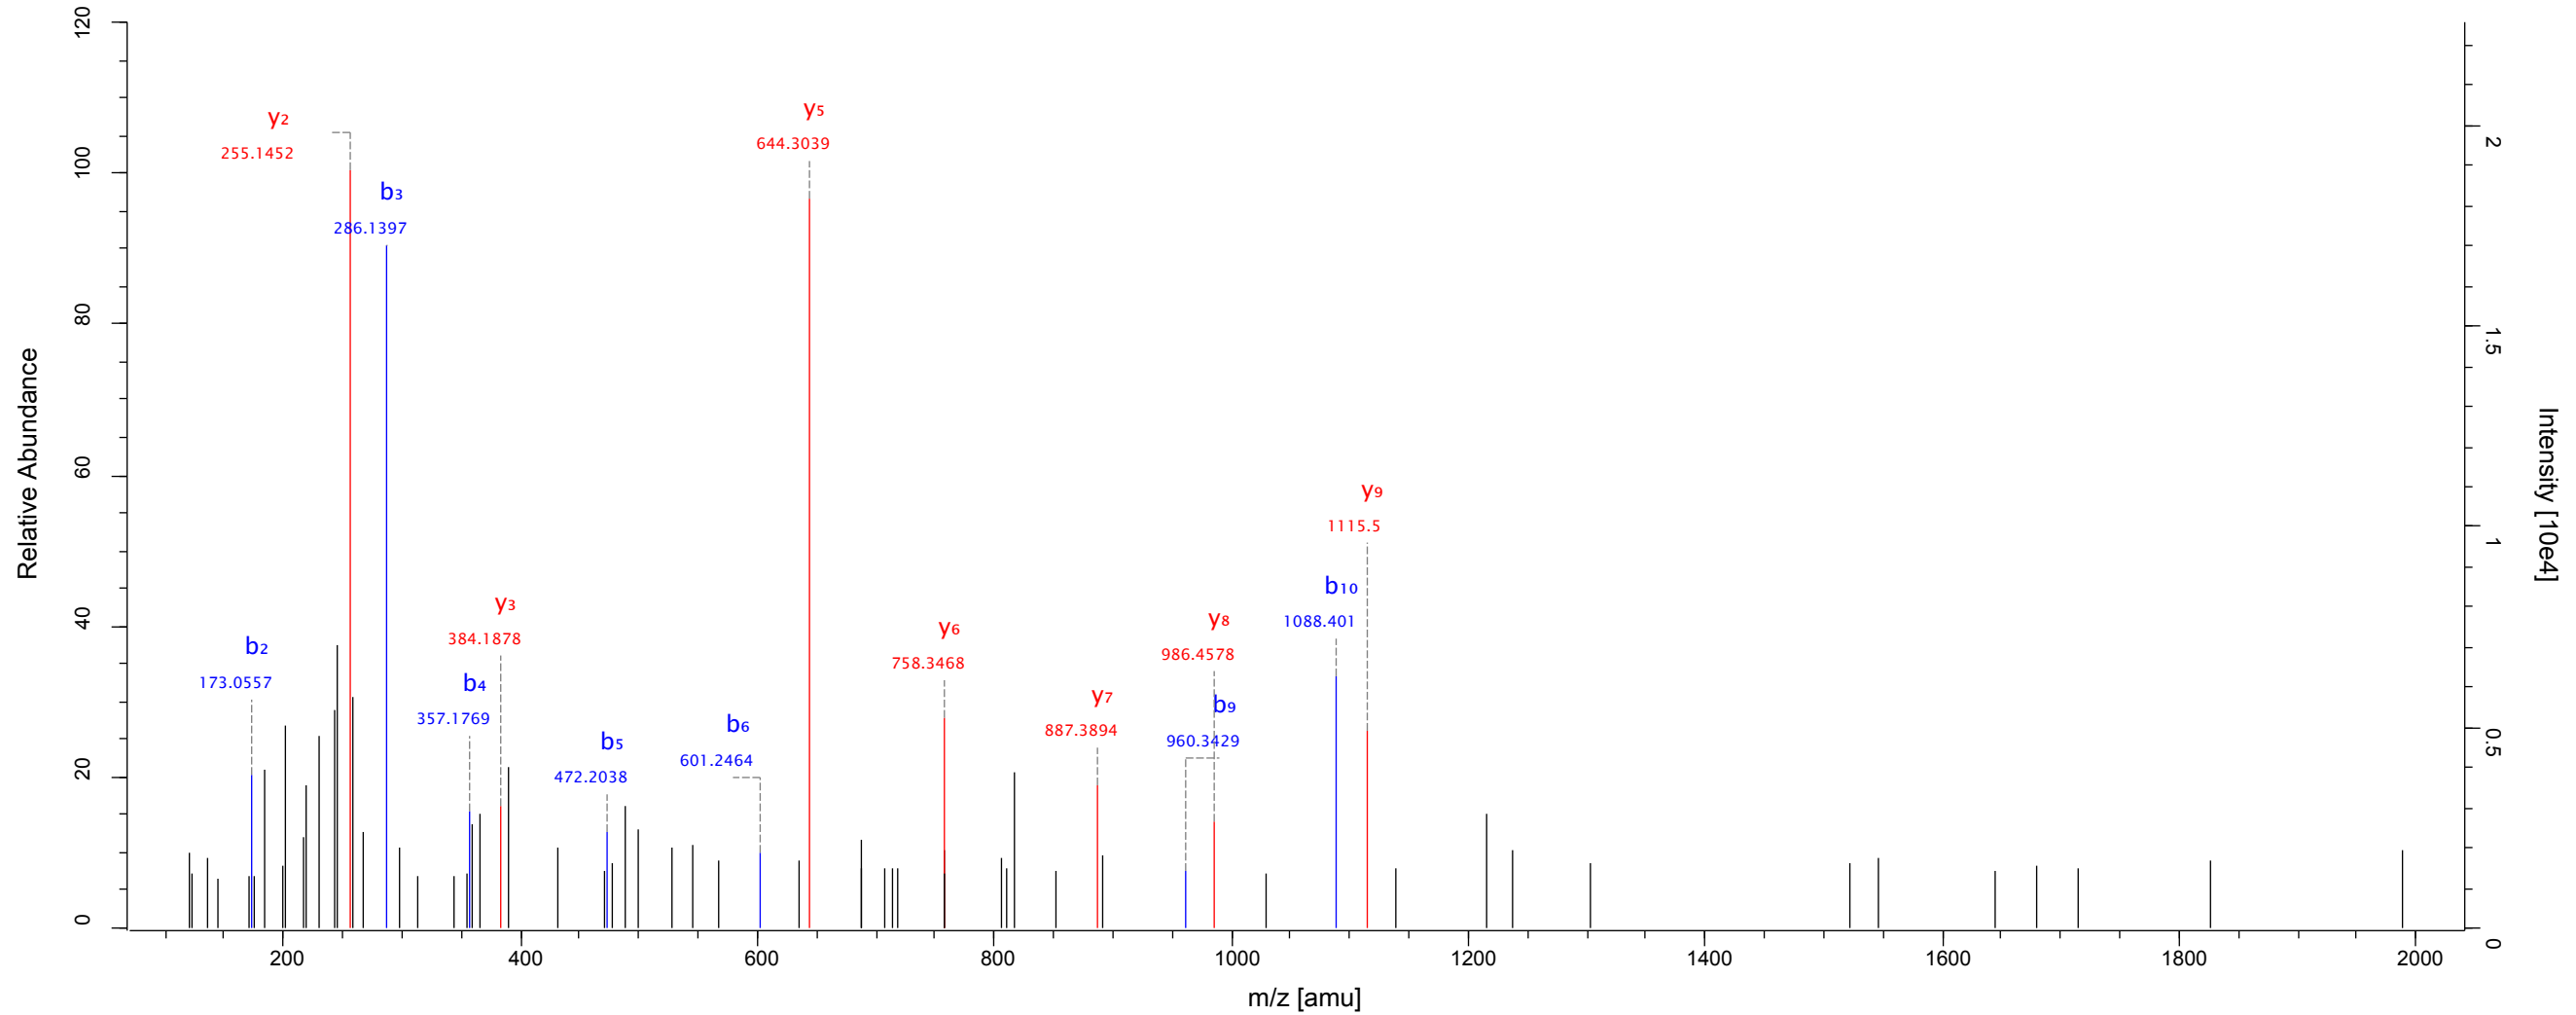

# peptide ID 18

Source: 20120816\_CO\_0340Gaje\_R02  
Scannumber: 10815  
Protein: pep\_101; pep\_secretome\_226; pep\_secretome\_22922  
Peptide Score: 87.77  
Method: FTMS; HCD; 1

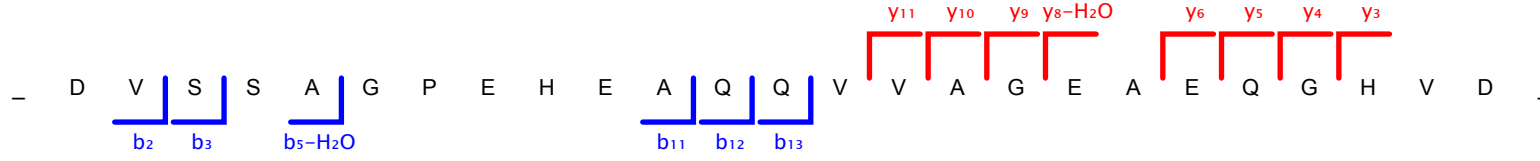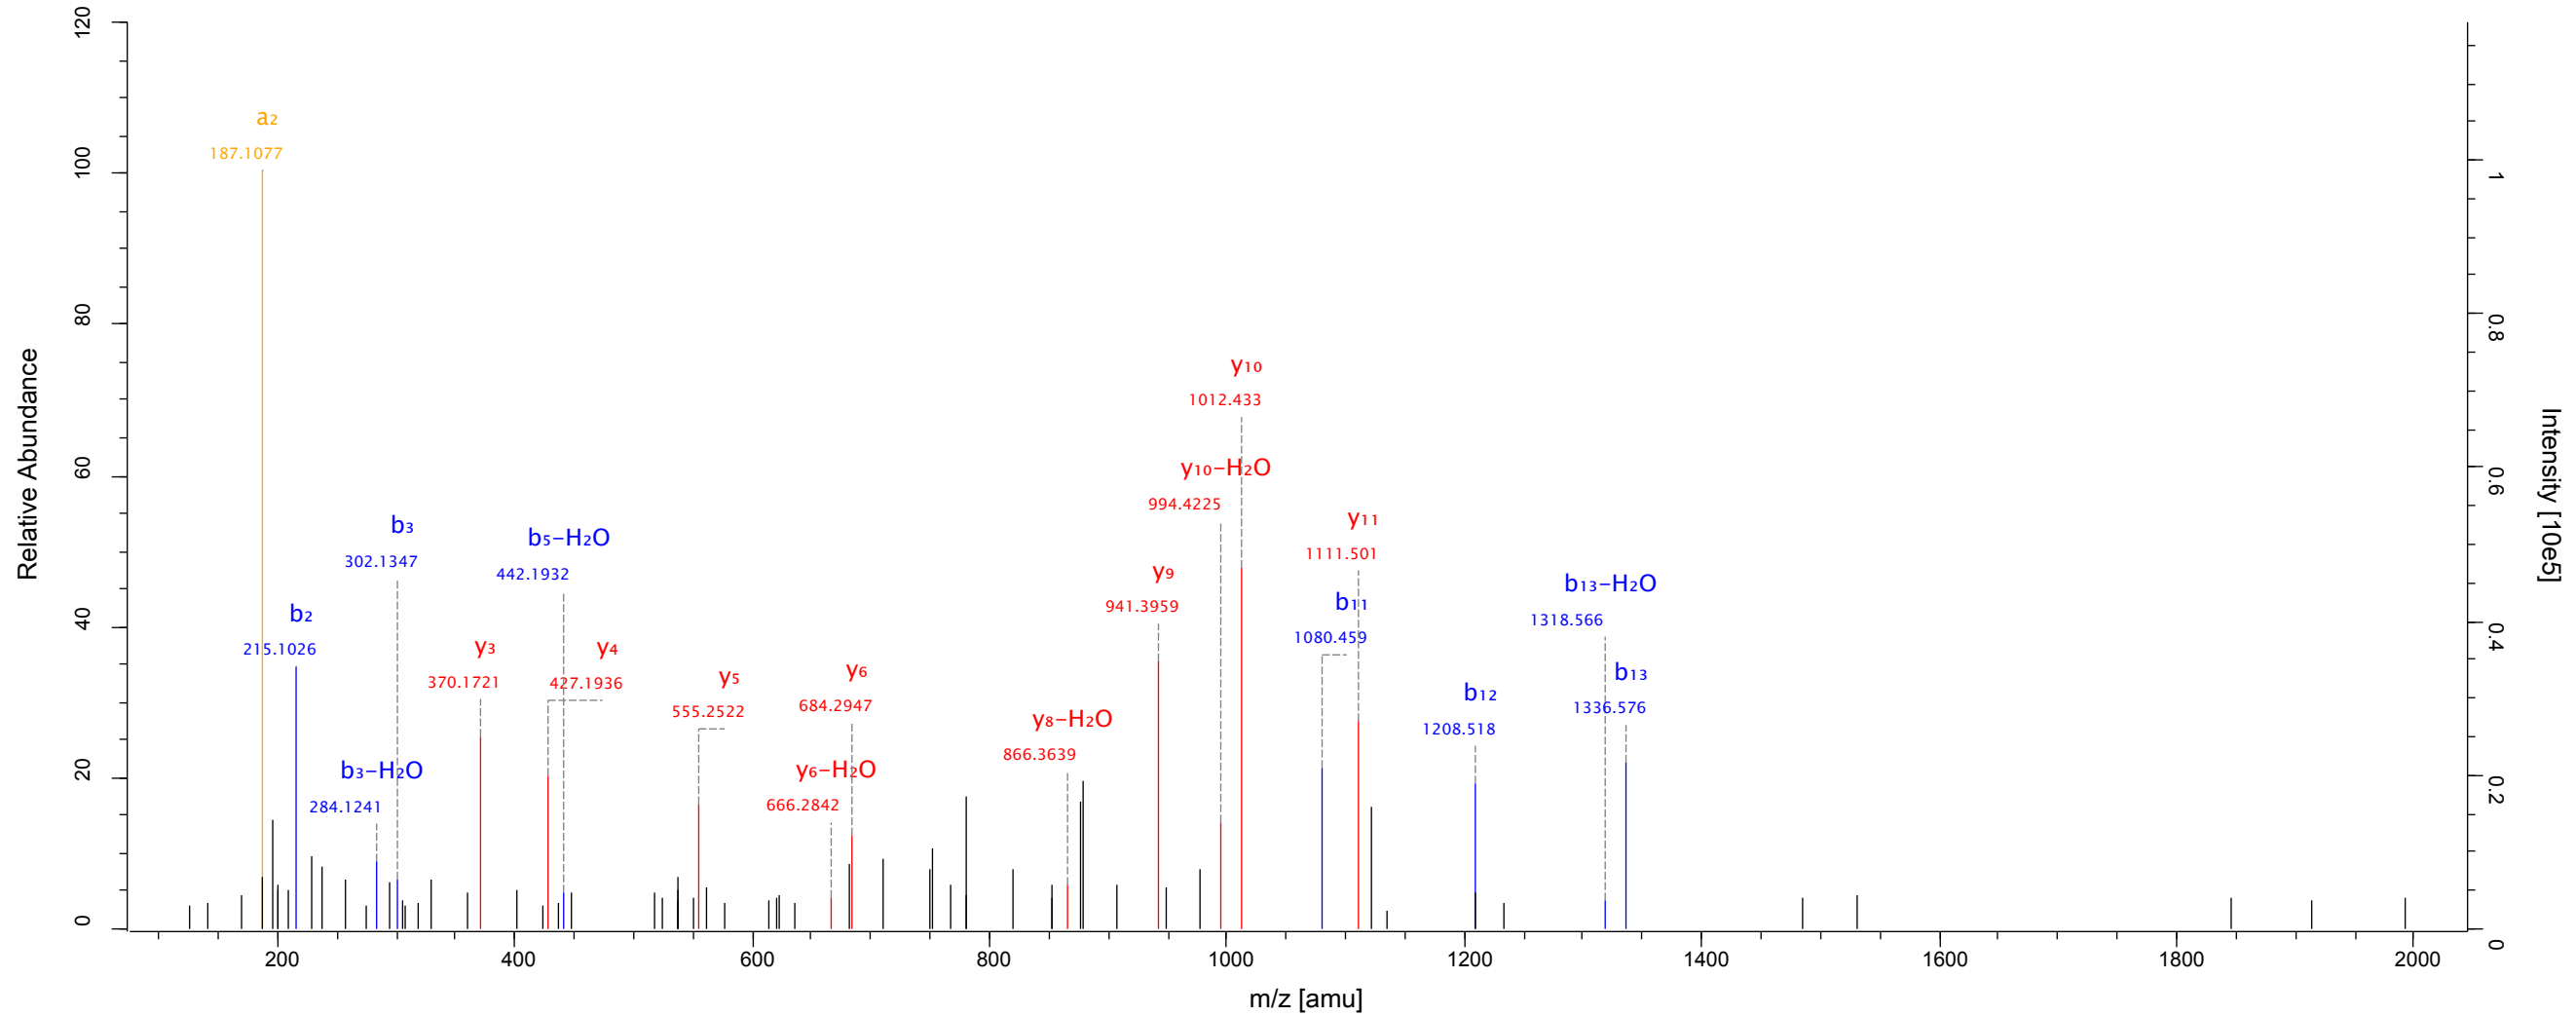

# peptide ID 19

Source: 20120816\_CO\_0340Gaje\_R02  
Scannumber: 5682  
Protein: orf\_3404; orf\_7292; pep\_secretome\_261  
Peptide Score: 65.72  
Method: FTMS; HCD; 1

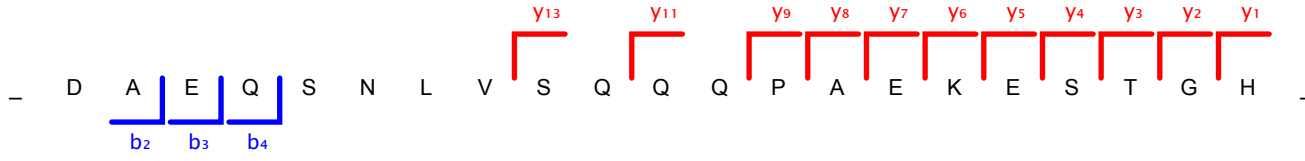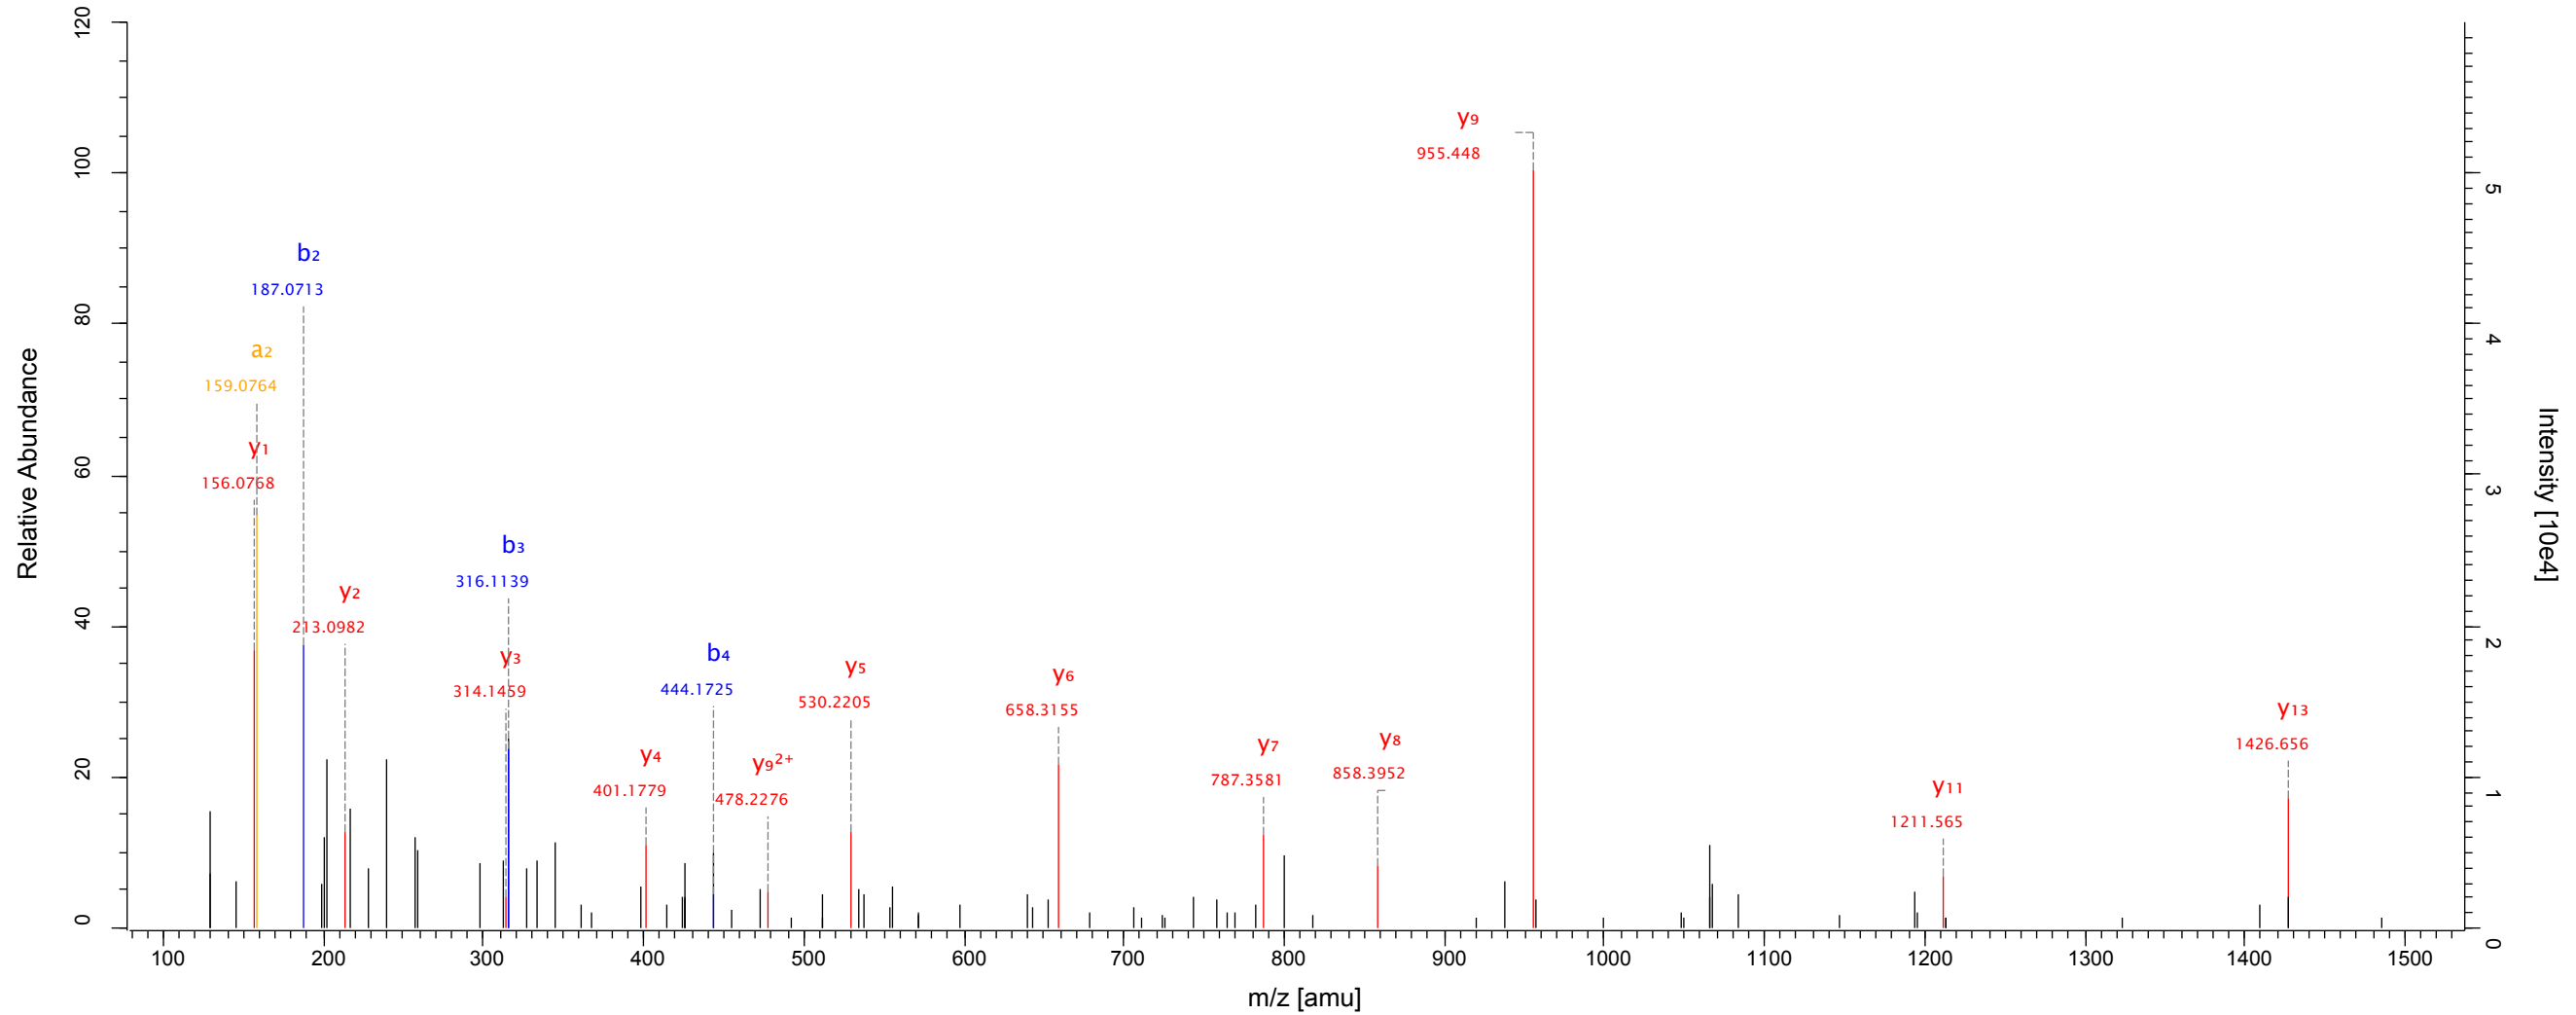

# peptide ID 20

Source: 20120816\_CO\_0340Gaje\_R02  
Scannumber: 10708  
Protein: pep\_128; pep\_secretome\_23090; pep\_secretome\_338  
Peptide Score: 78.93  
Method: FTMS; HCD; 1

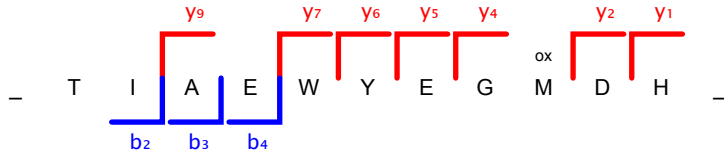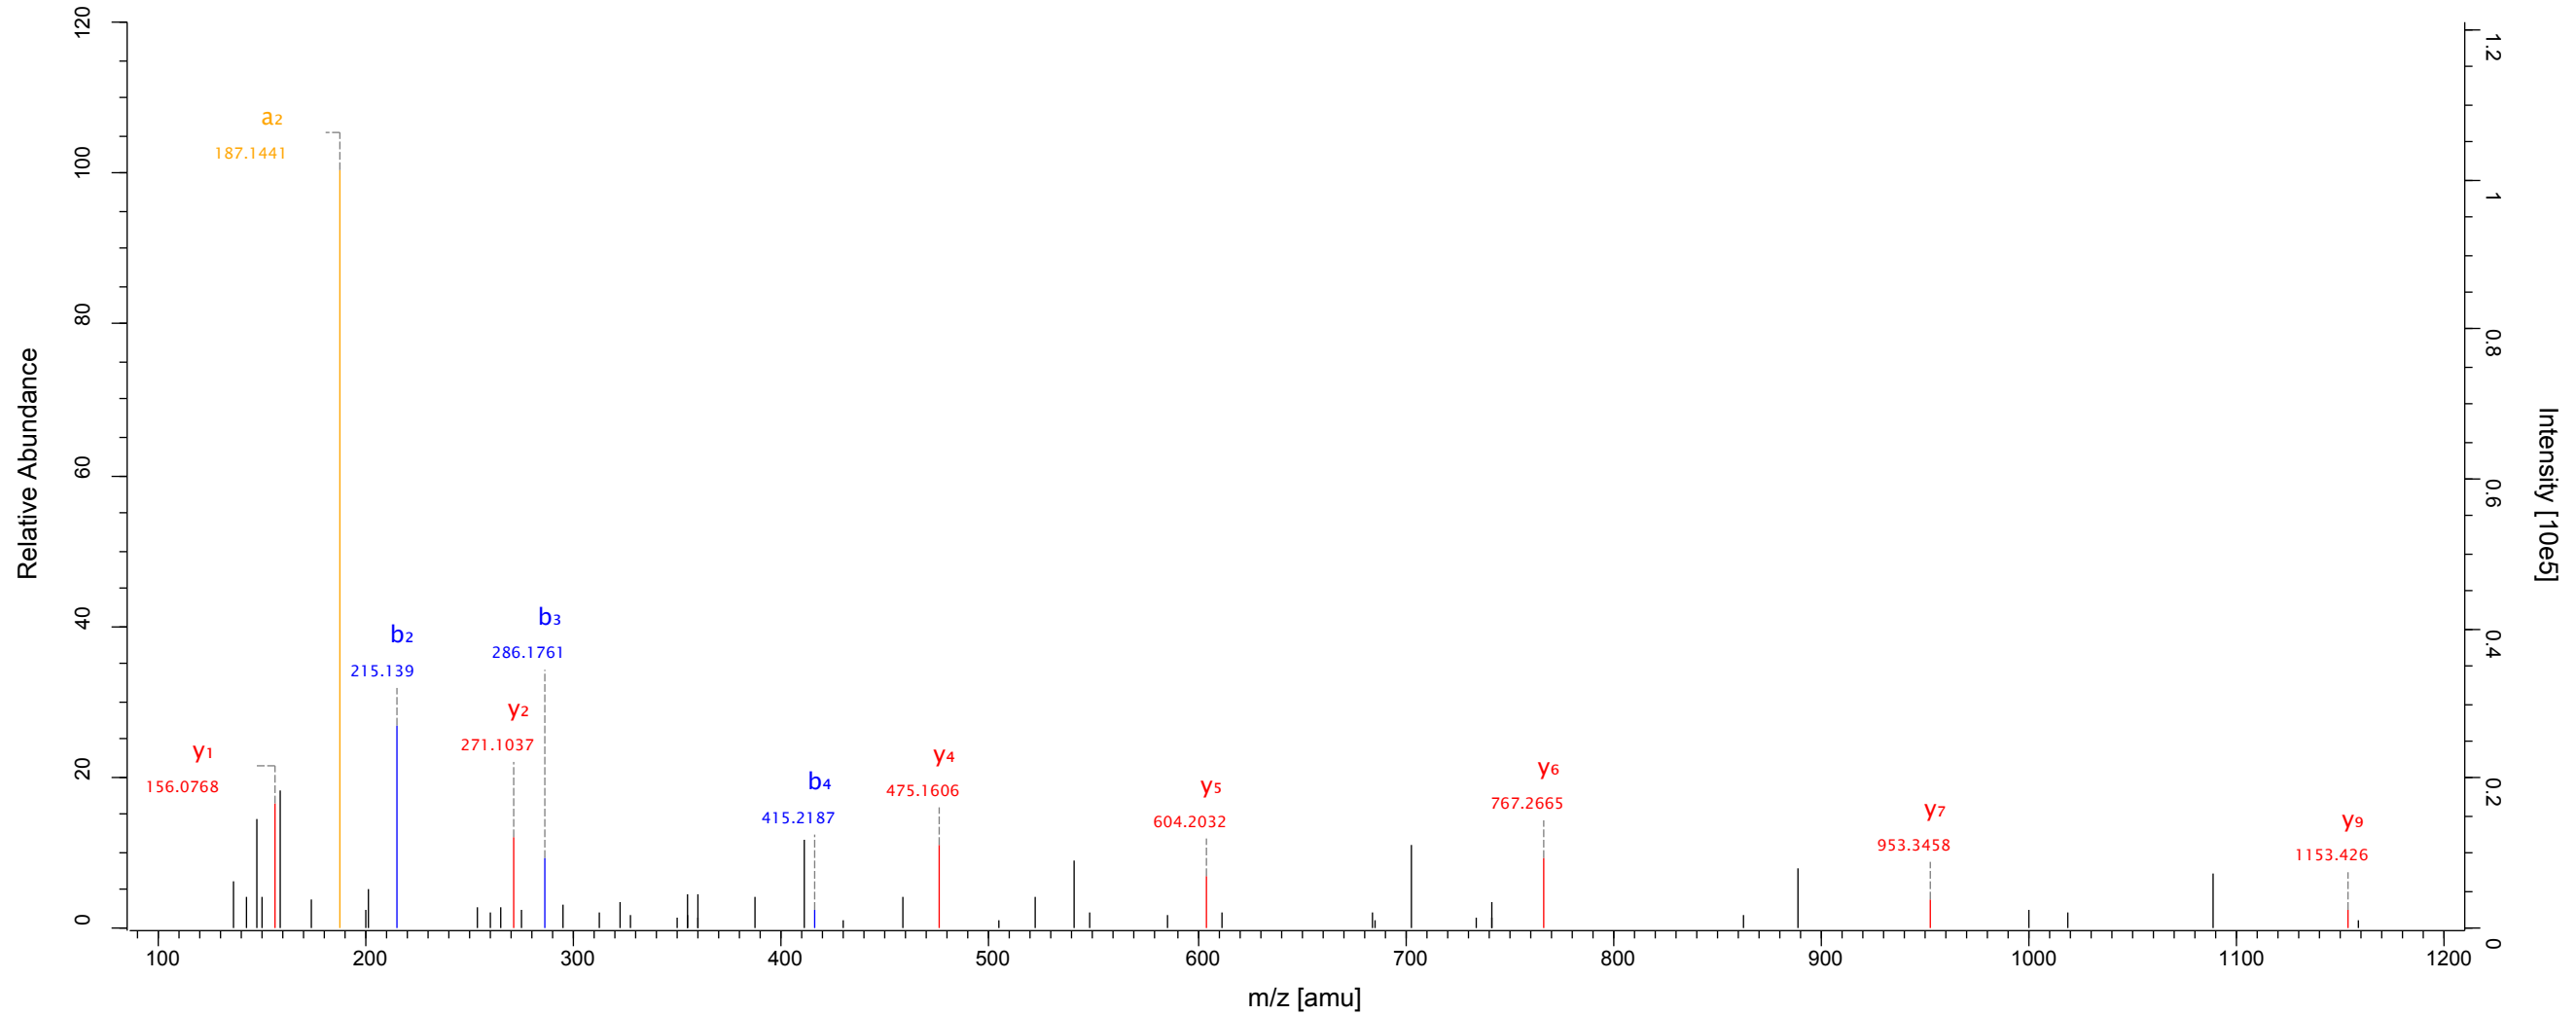



# peptide ID 21

Source: 20120816\_CO\_0340Gaje\_R02  
Scannumber: 9645  
Protein: pep\_83; pep\_secretome\_172; pep\_secretome\_22851  
Peptide Score: 54.47  
Method: FTMS; HCD; 1

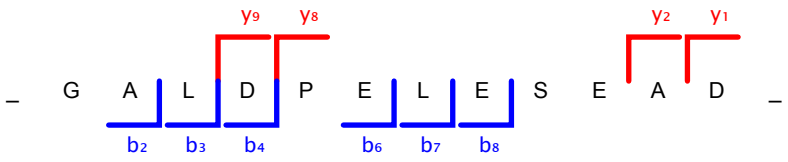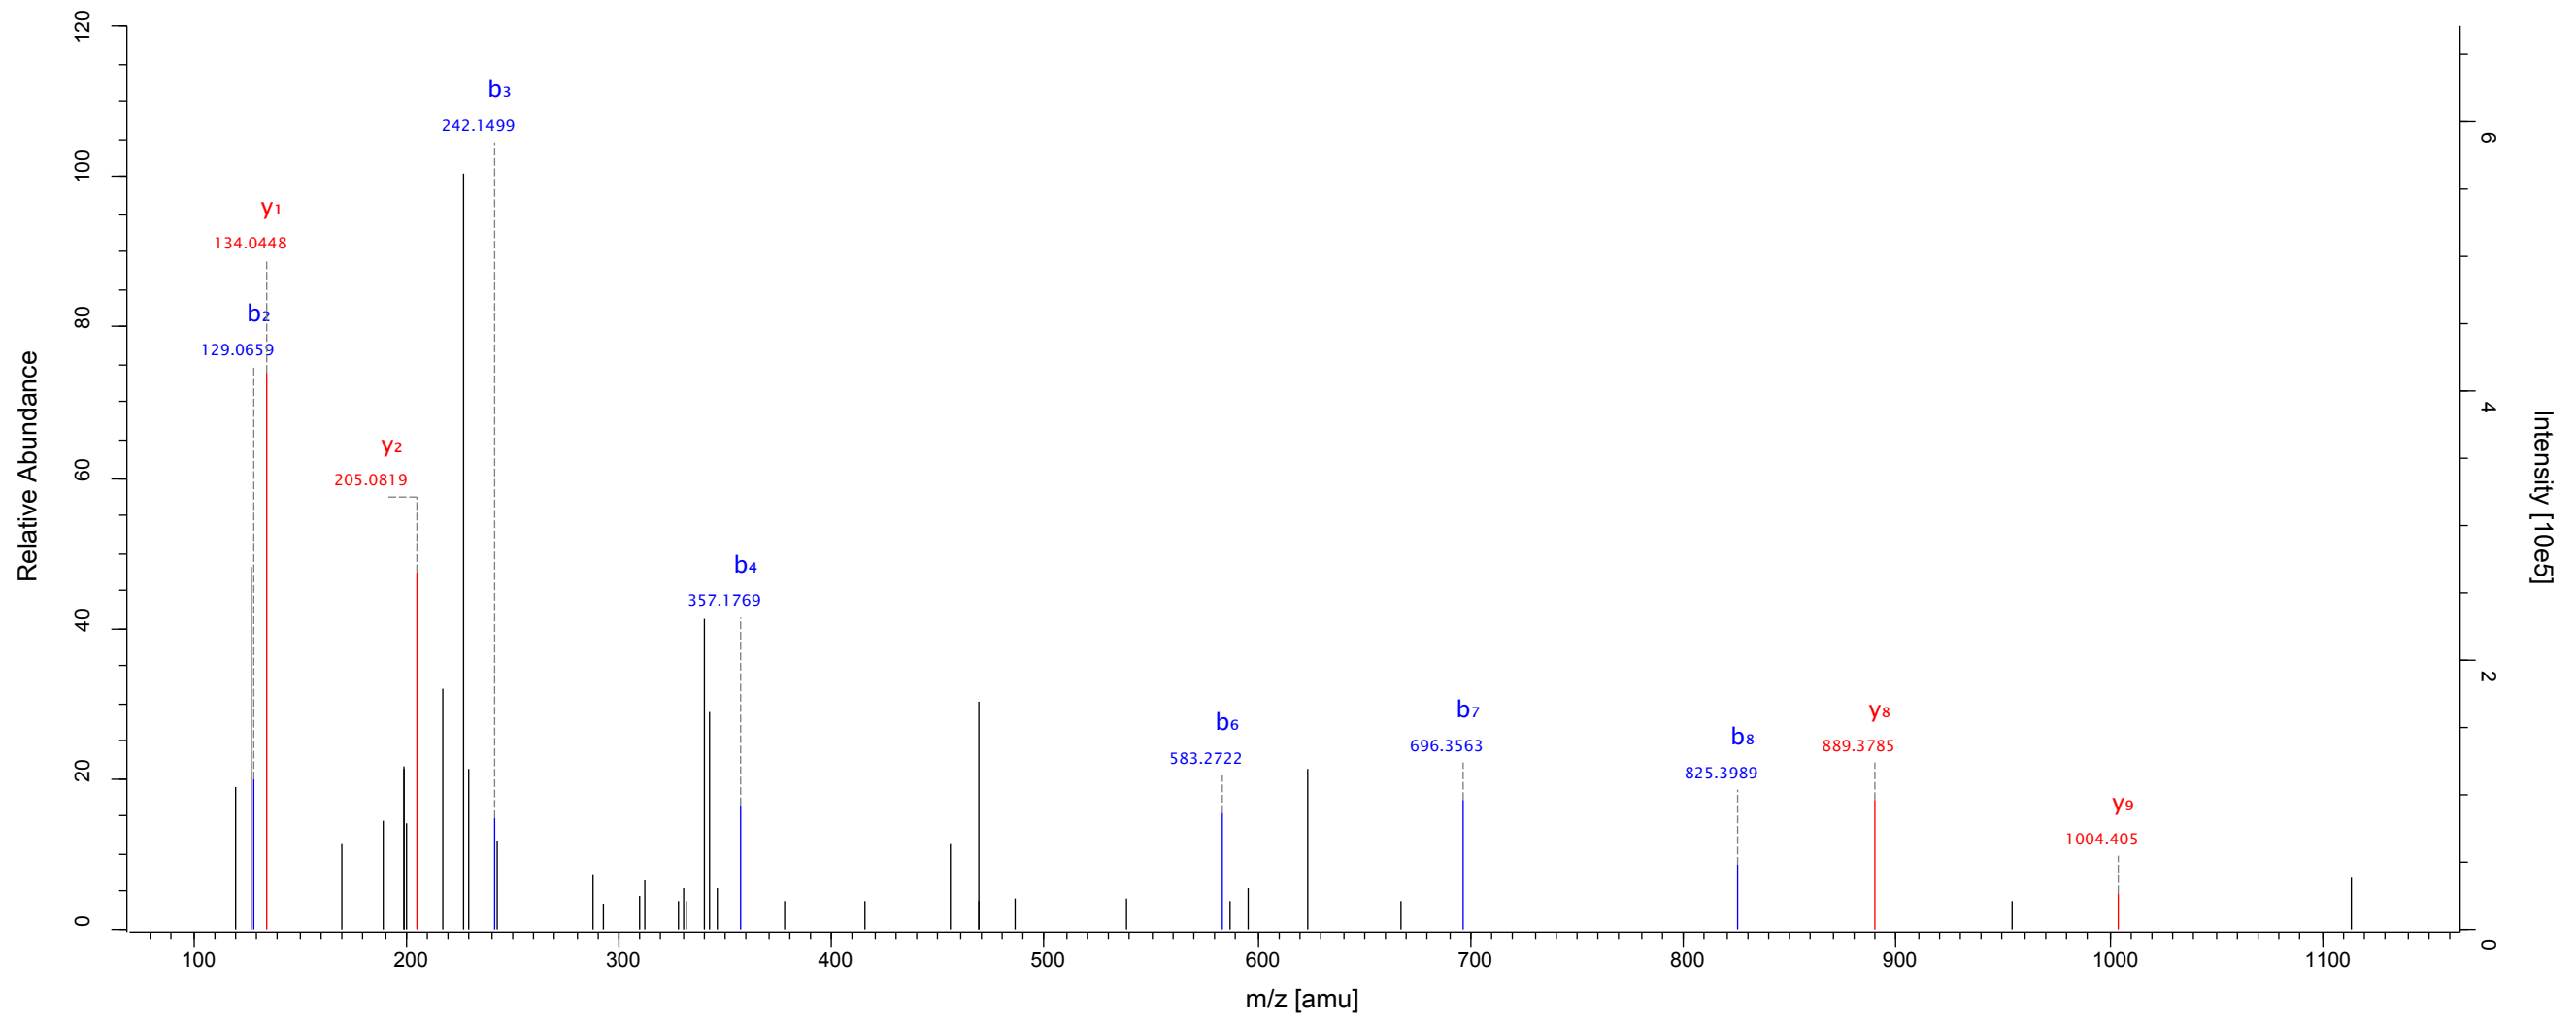

# peptide ID 22

Source: 20121106\_CO\_0340Gaje\_R02\_2  
Scannumber: 12611  
Protein: orf\_11796; orf\_7288  
Peptide Score: 68.07  
Method: FTMS; HCD; 1

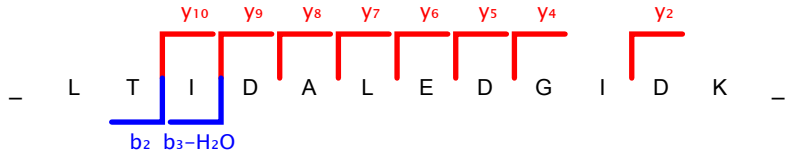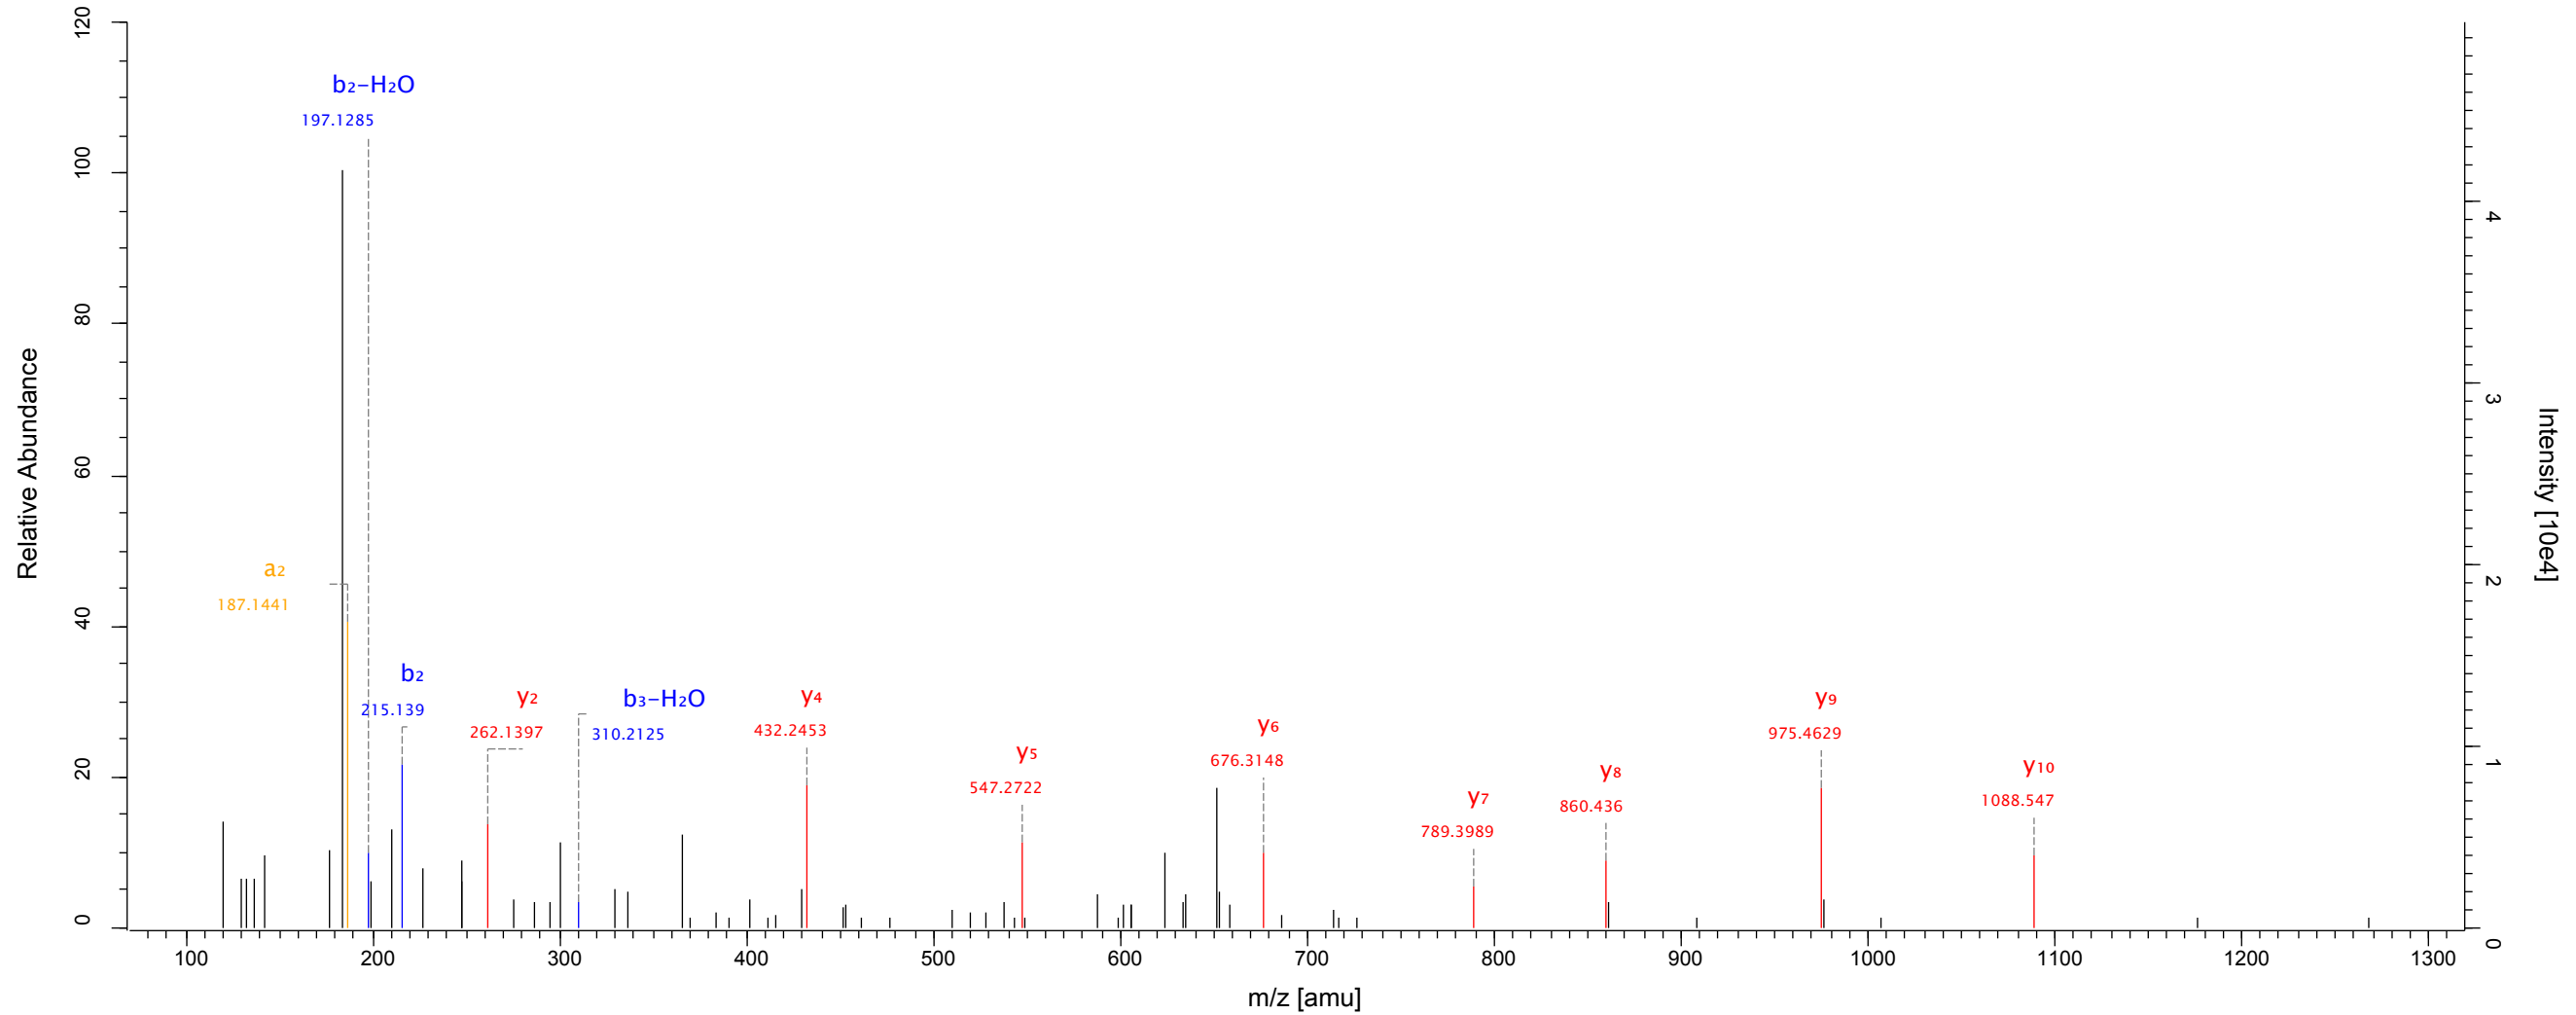

# peptide ID 23

Source: 20120816\_CO\_0340Gaje\_R02  
Scannumber: 16701  
Protein: pep\_8; pep\_secretome\_12; SinglePep63  
Peptide Score: 70.73  
Method: FTMS; HCD; 1

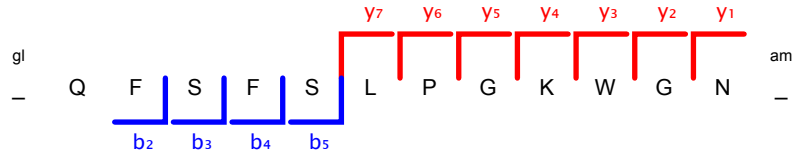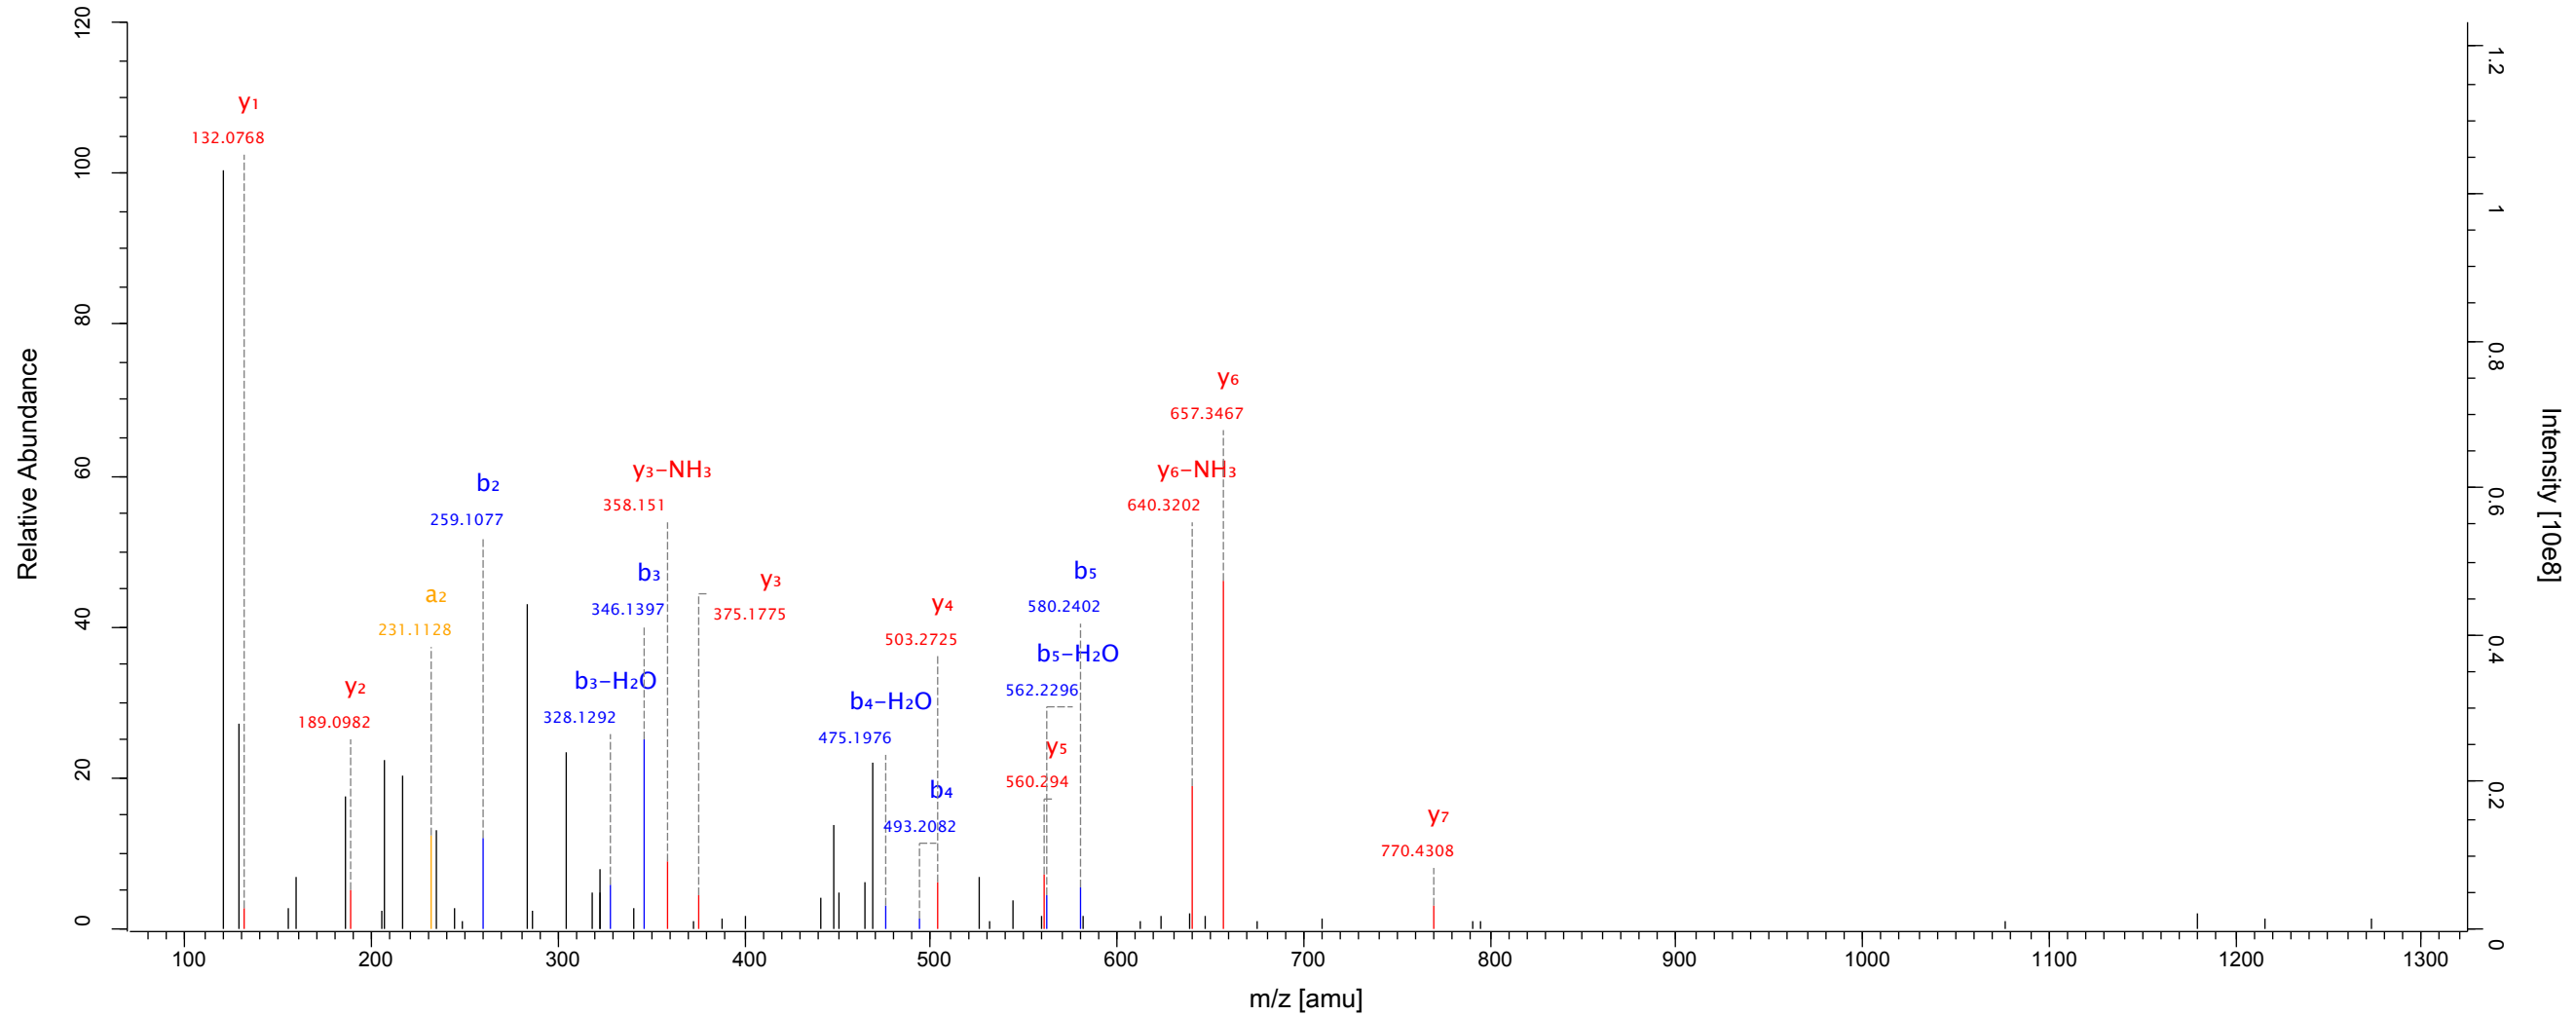

# peptide ID 24

Source: 20120515\_CO\_0340Gaje\_R01  
Scannumber: 21023  
Protein: pep\_74; pep\_secretome\_152  
Peptide Score: 71.34  
Method: FTMS; HCD; 1

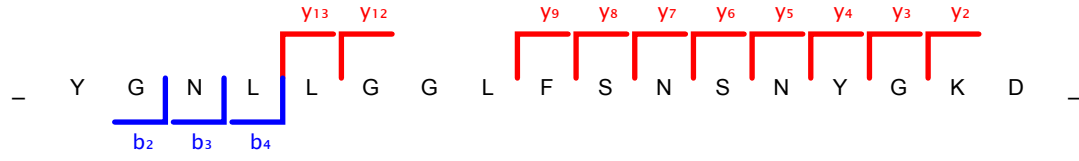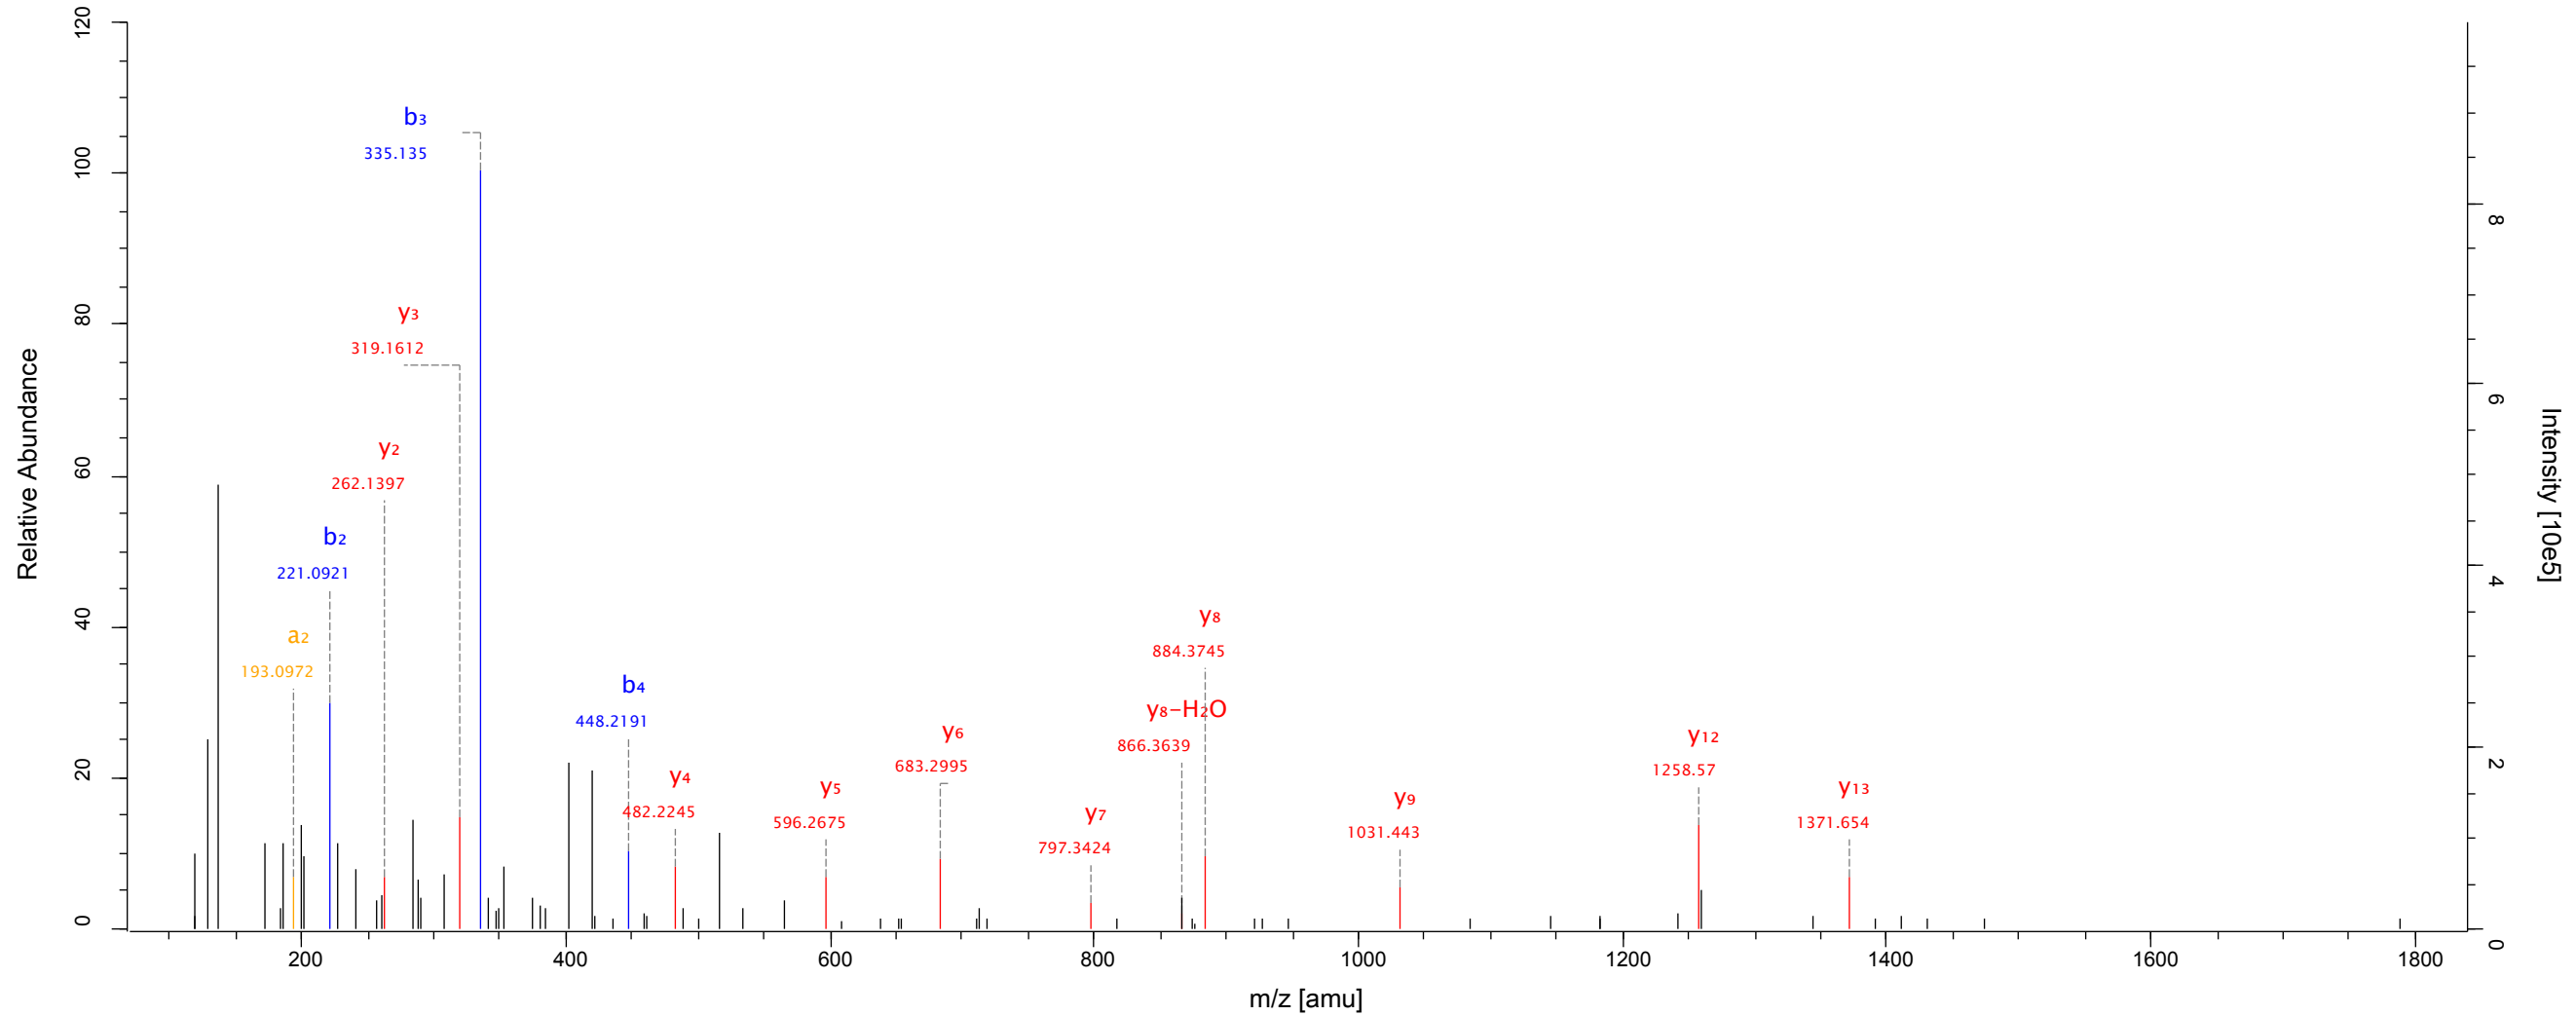

# peptide ID 25

Source: 20121106\_CO\_0340Gaje\_R02\_2  
Scannumber: 10053  
Protein: pep\_75; pep\_secretome\_153  
Peptide Score: 92.19  
Method: FTMS; HCD; 1

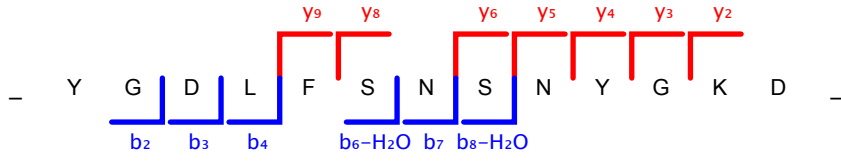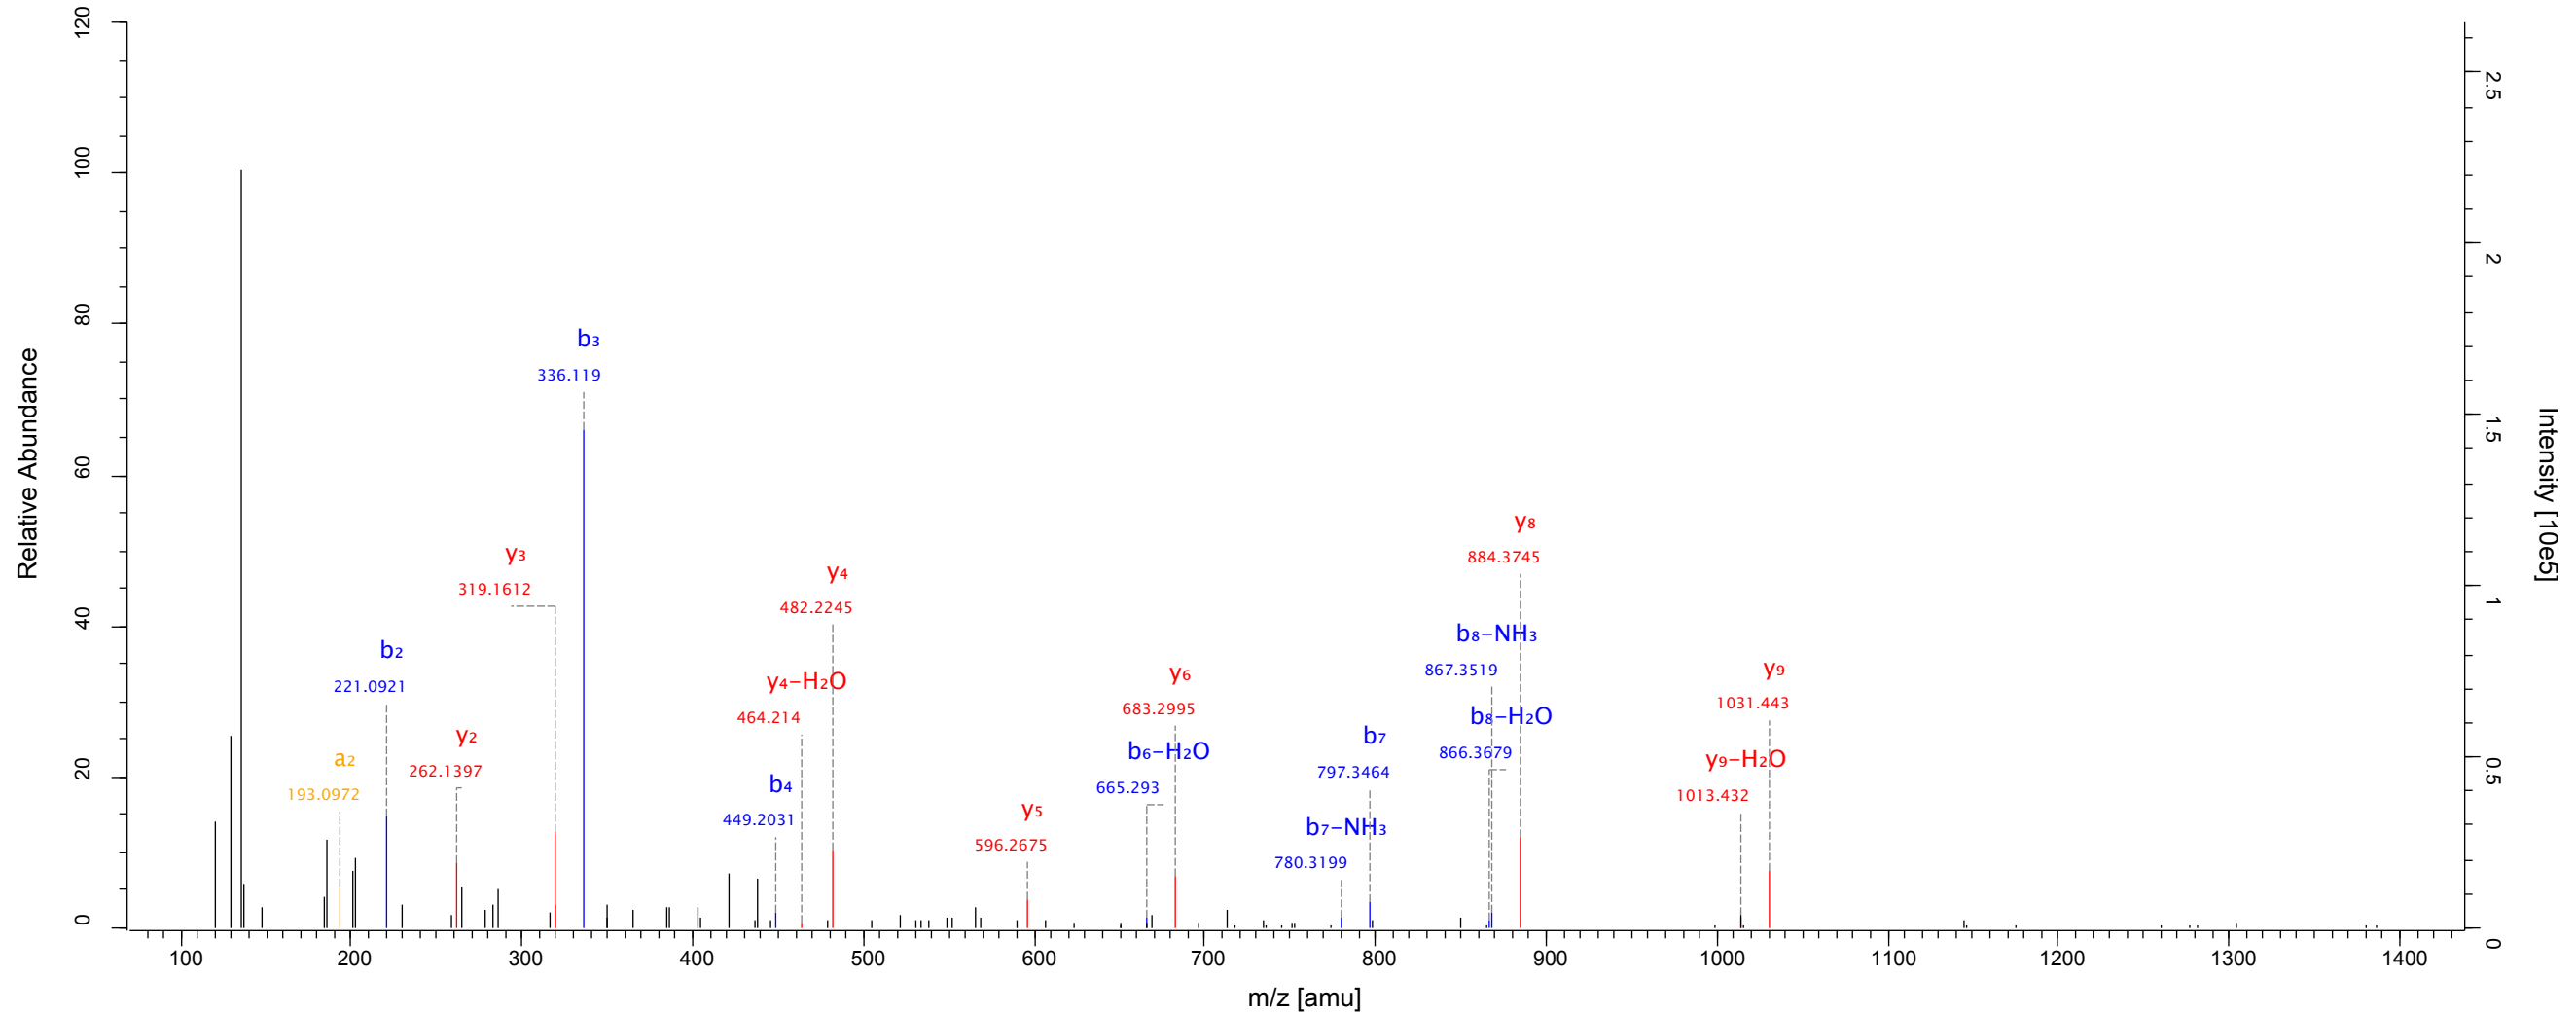

# peptide ID 26

Source: 20121106\_CO\_0340Gaje\_R02\_2  
Scannumber: 8619  
Protein: pep\_76; pep\_secretome\_154  
Peptide Score: 78.69  
Method: FTMS; HCD; 1

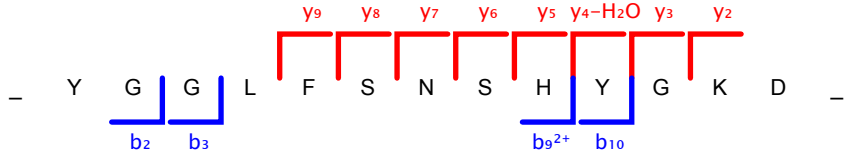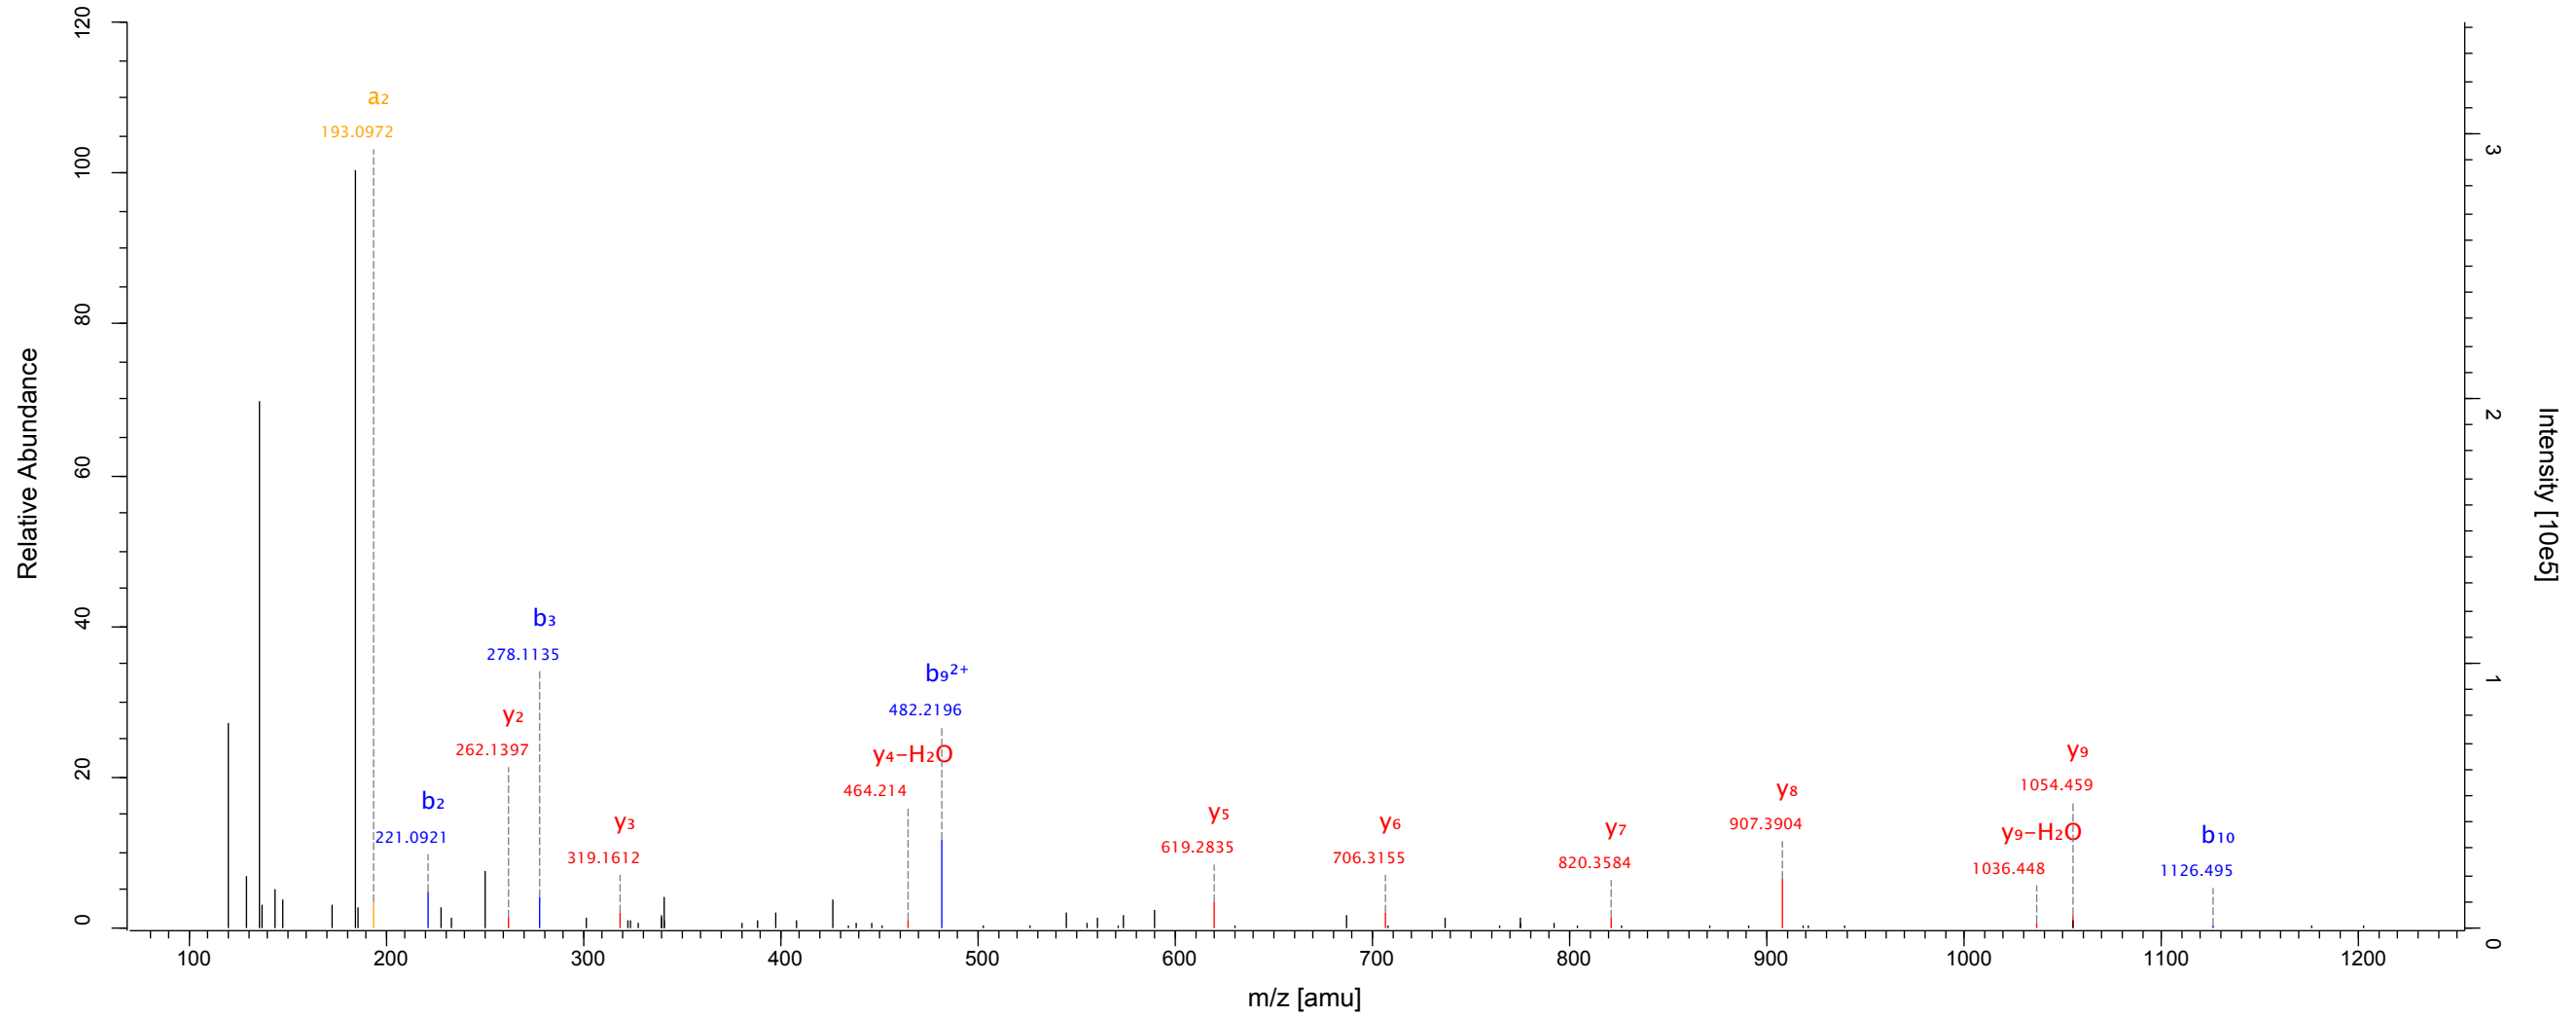

# peptide ID 27

Source: 20120816\_CO\_0340Gaje\_R02  
Scannumber: 16470  
Protein: orf\_7287; orf\_6583; orf\_1494; pep\_77; pep\_secretome\_155  
Peptide Score: 113.63  
Method: FTMS; HCD; 1

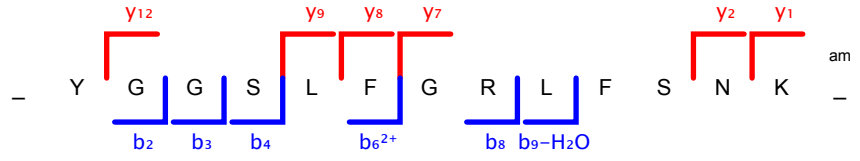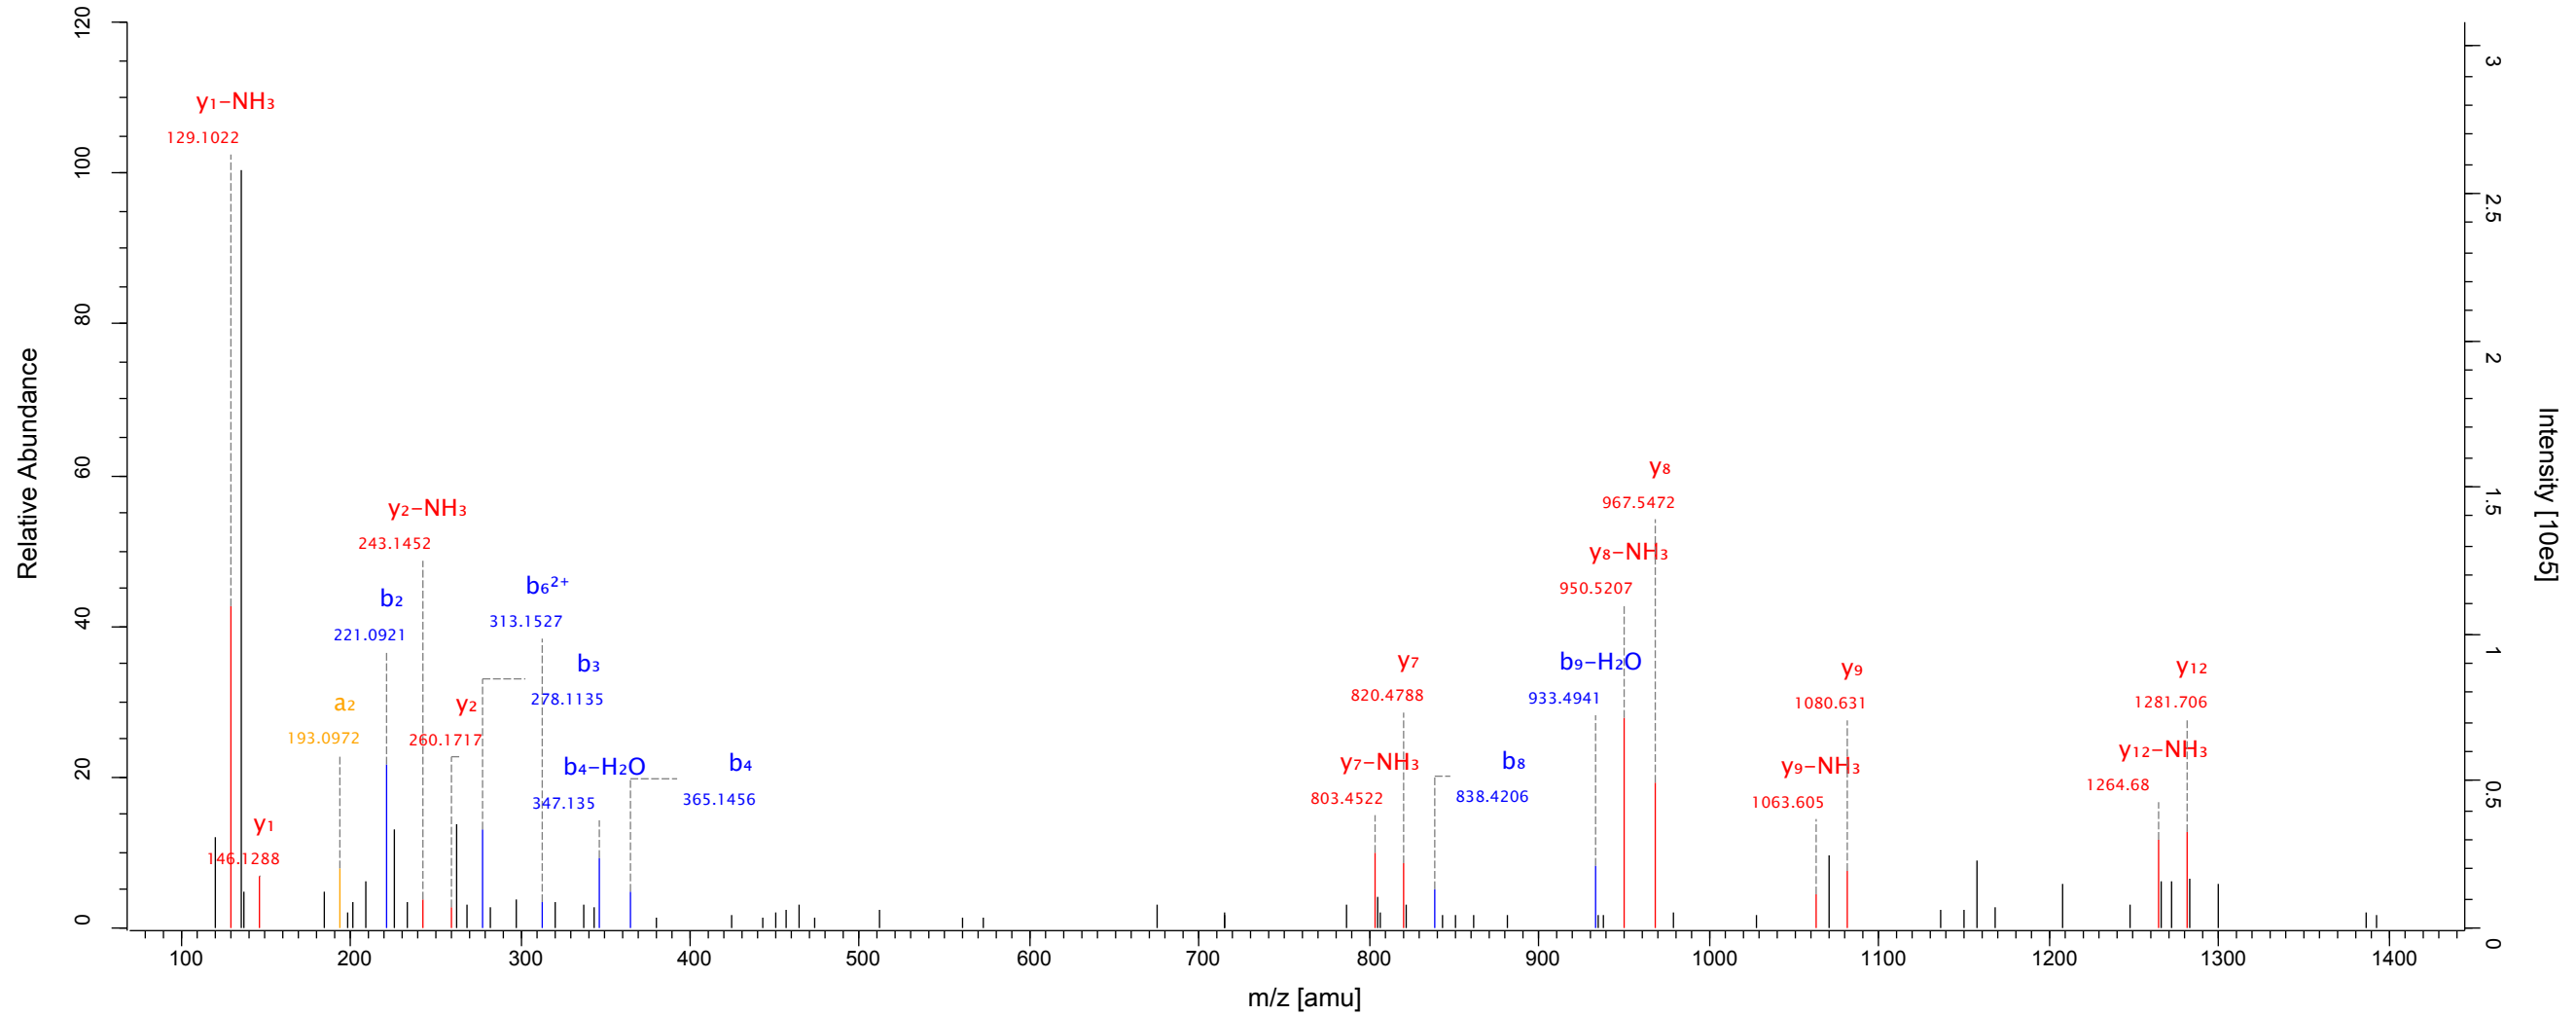

# peptide ID 28

Source: 20120816\_CO\_0340Gaje\_R02  
Scannumber: 15205  
Protein: pep\_78; pep\_secretome\_156  
Peptide Score: 70.62  
Method: FTMS; HCD; 1

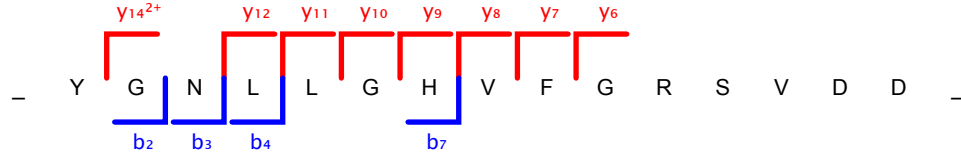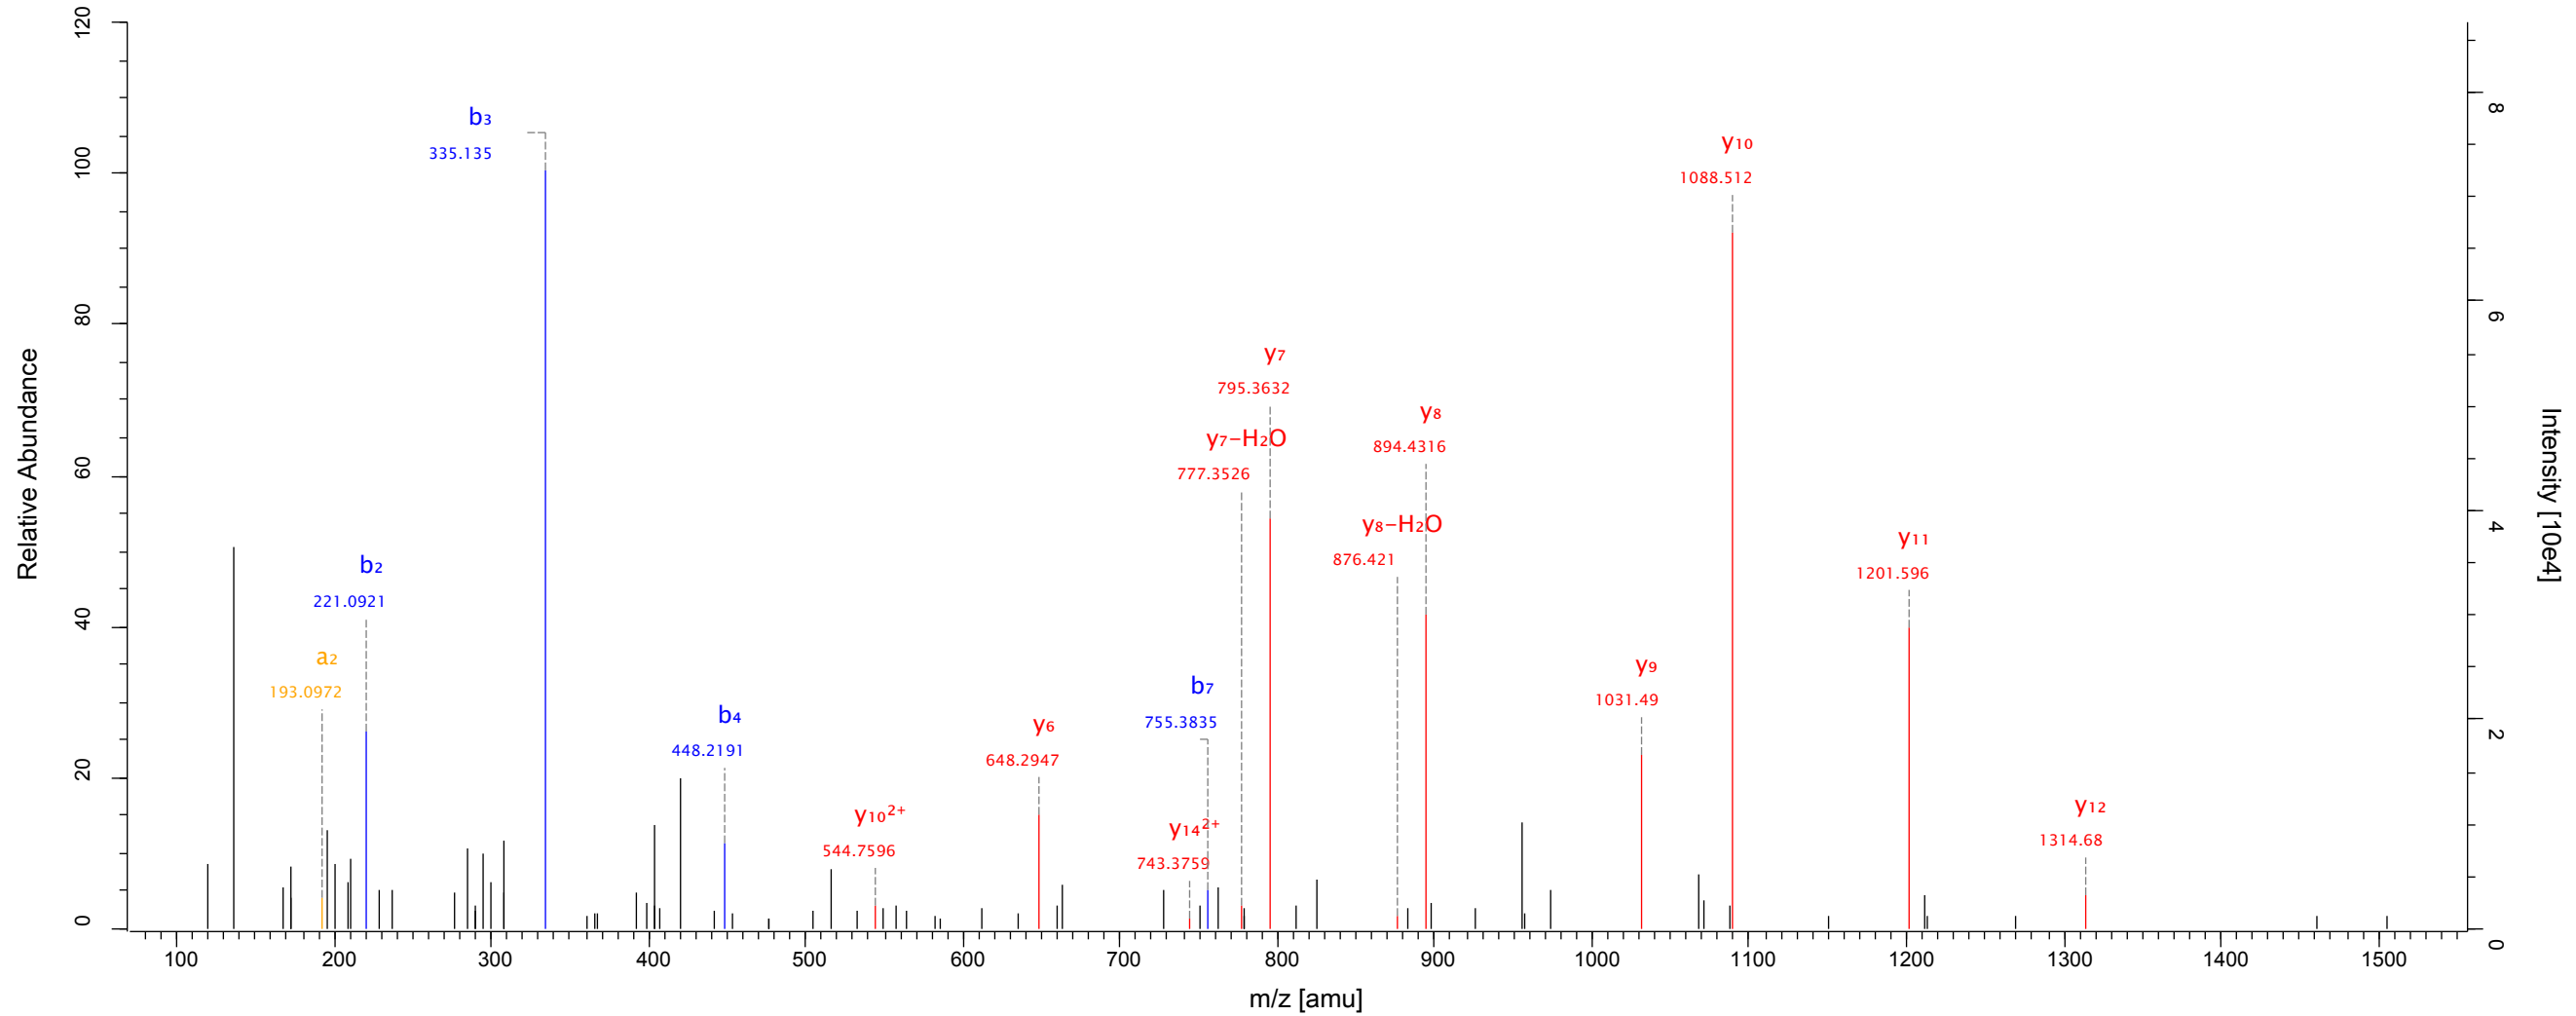



# peptide ID 29

Source: 20120515\_CO\_0340Gaje\_R01  
Scannumber: 16424  
Protein: orf\_7287; orf\_6583; orf\_8467; orf\_1494; orf\_31538  
Peptide Score: 81.43  
Method: FTMS; HCD; 1

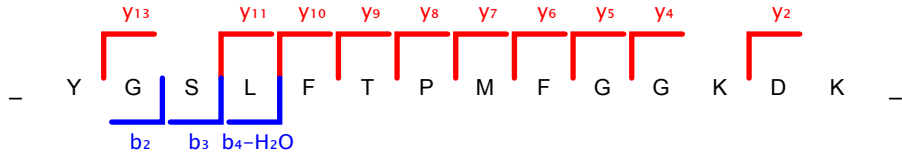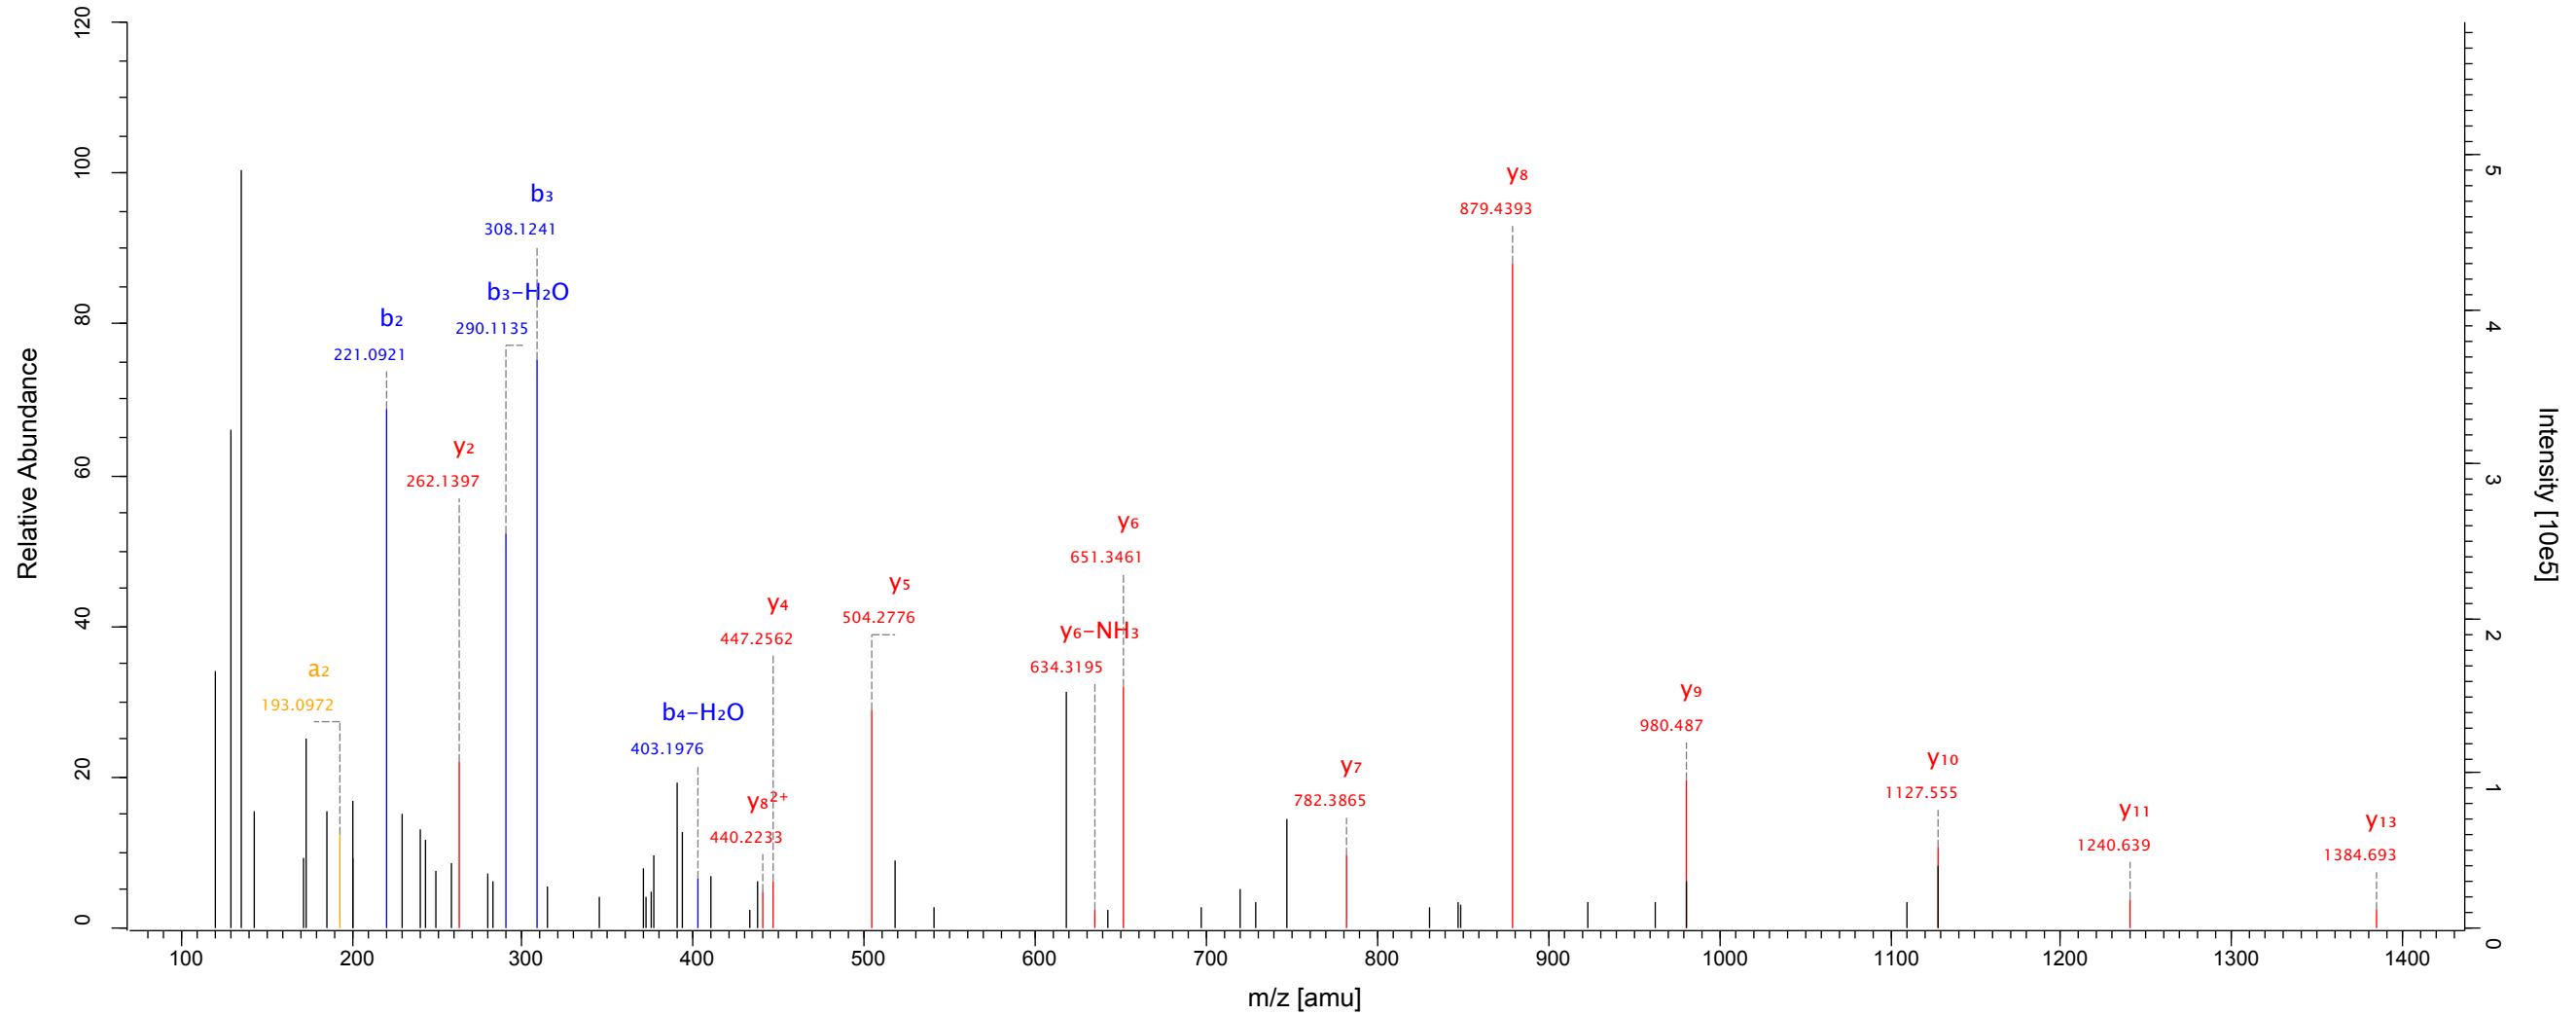

# peptide ID 30

Source: 20120816\_CO\_0340Gaje\_R02  
Scannumber: 12518  
Protein: orf\_31538  
Peptide Score: 61.38  
Method: FTMS; HCD; 1

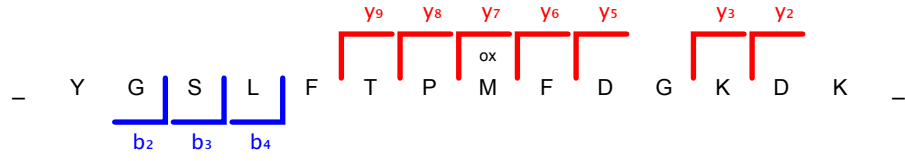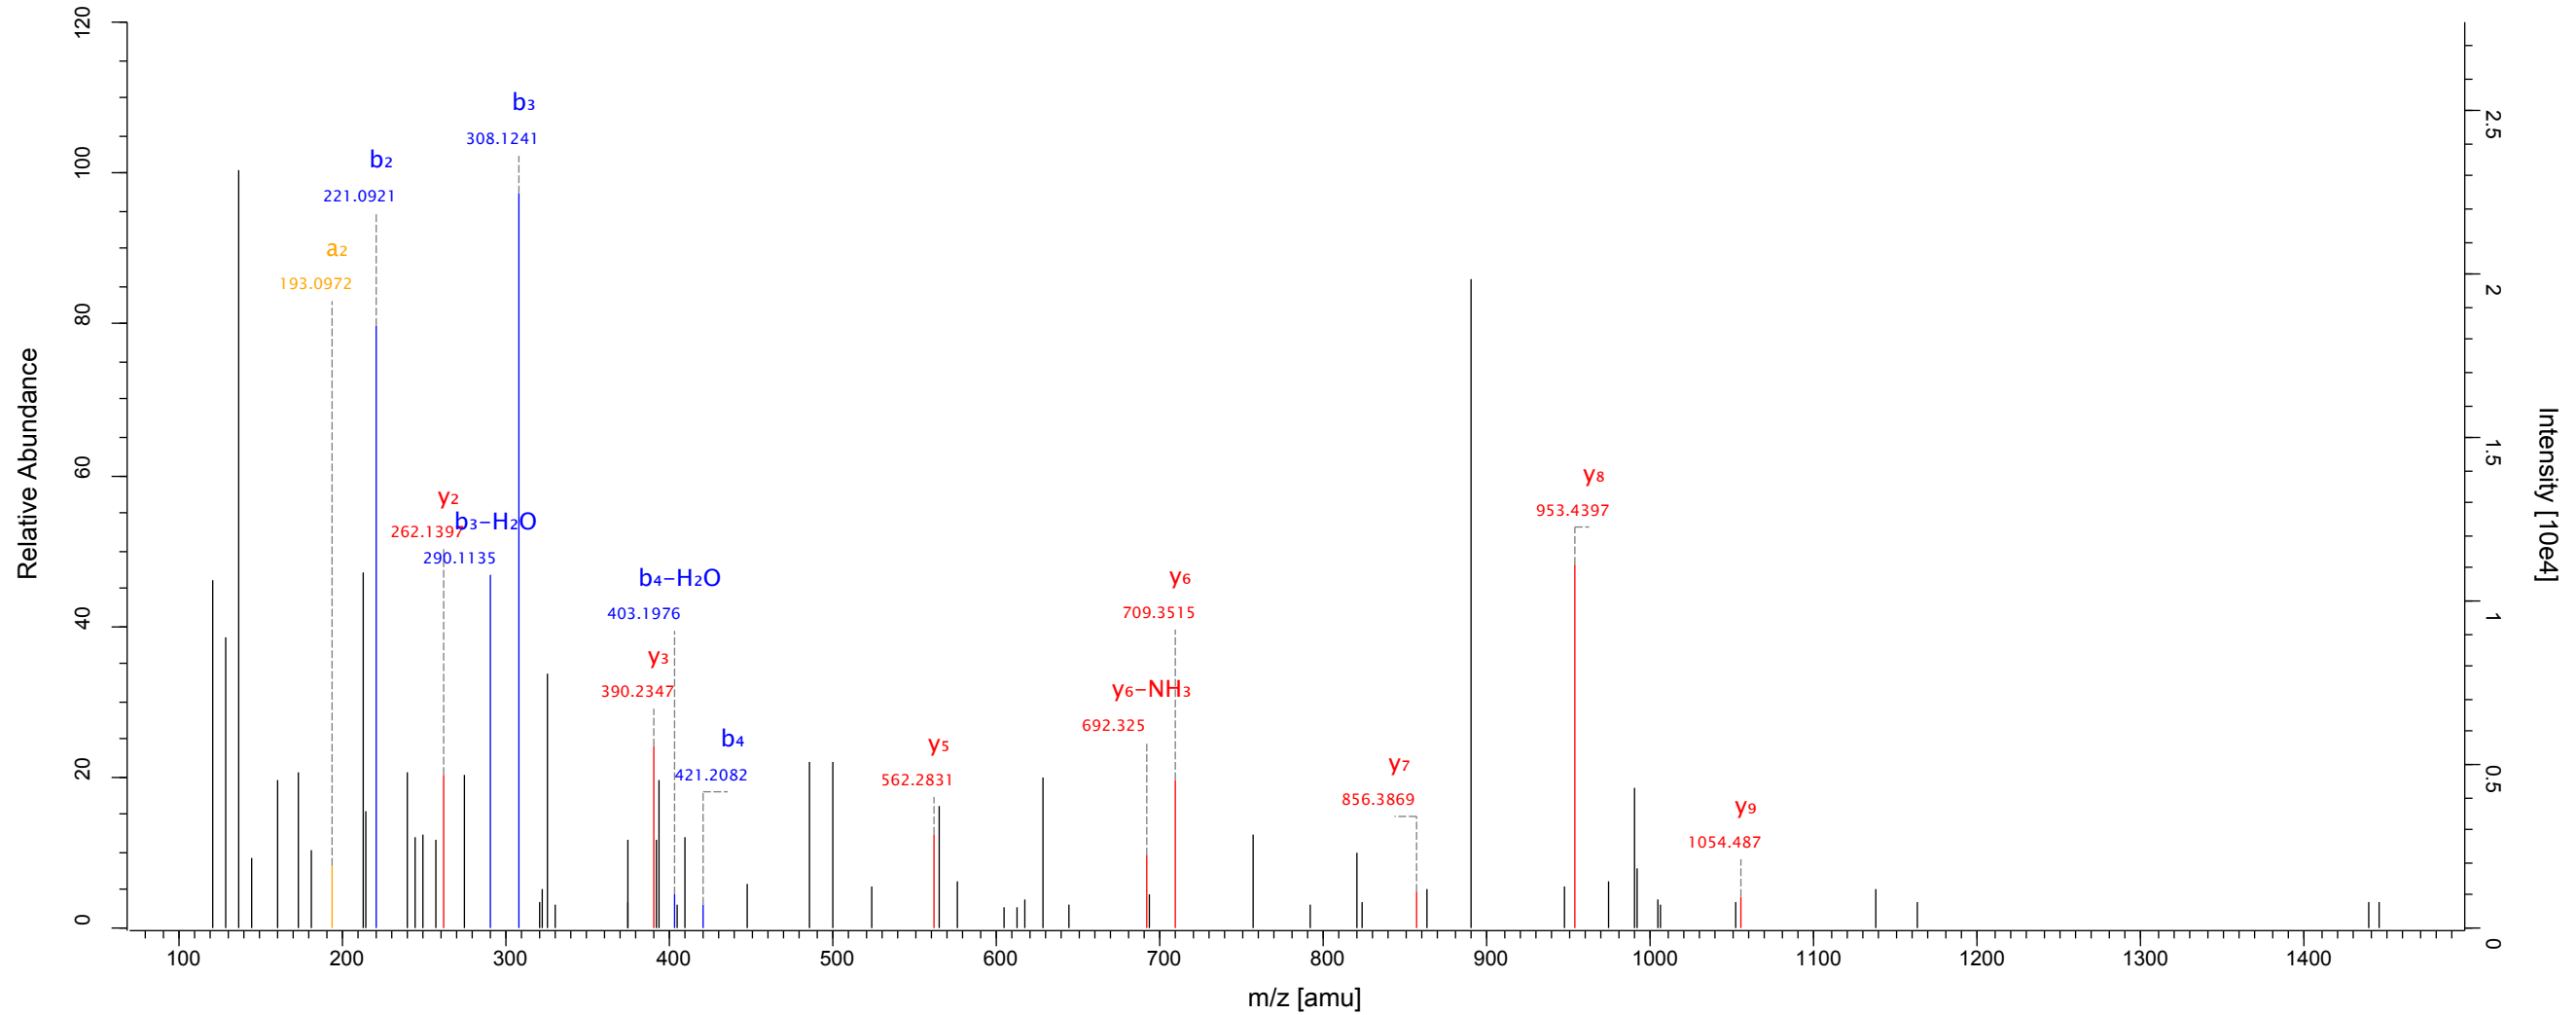

# peptide ID 31

Source: 20121106\_CO\_0340Gaje\_R02\_2  
Scannumber: 12572  
Protein: pep\_79; pep\_secretome\_159; pep\_secretome\_160; pep\_secretome\_161; pep\_secretome\_162  
Peptide Score: 91.31  
Method: FTMS; HCD; 1

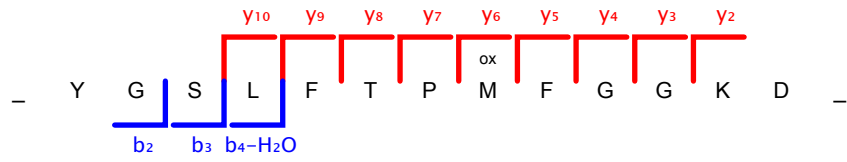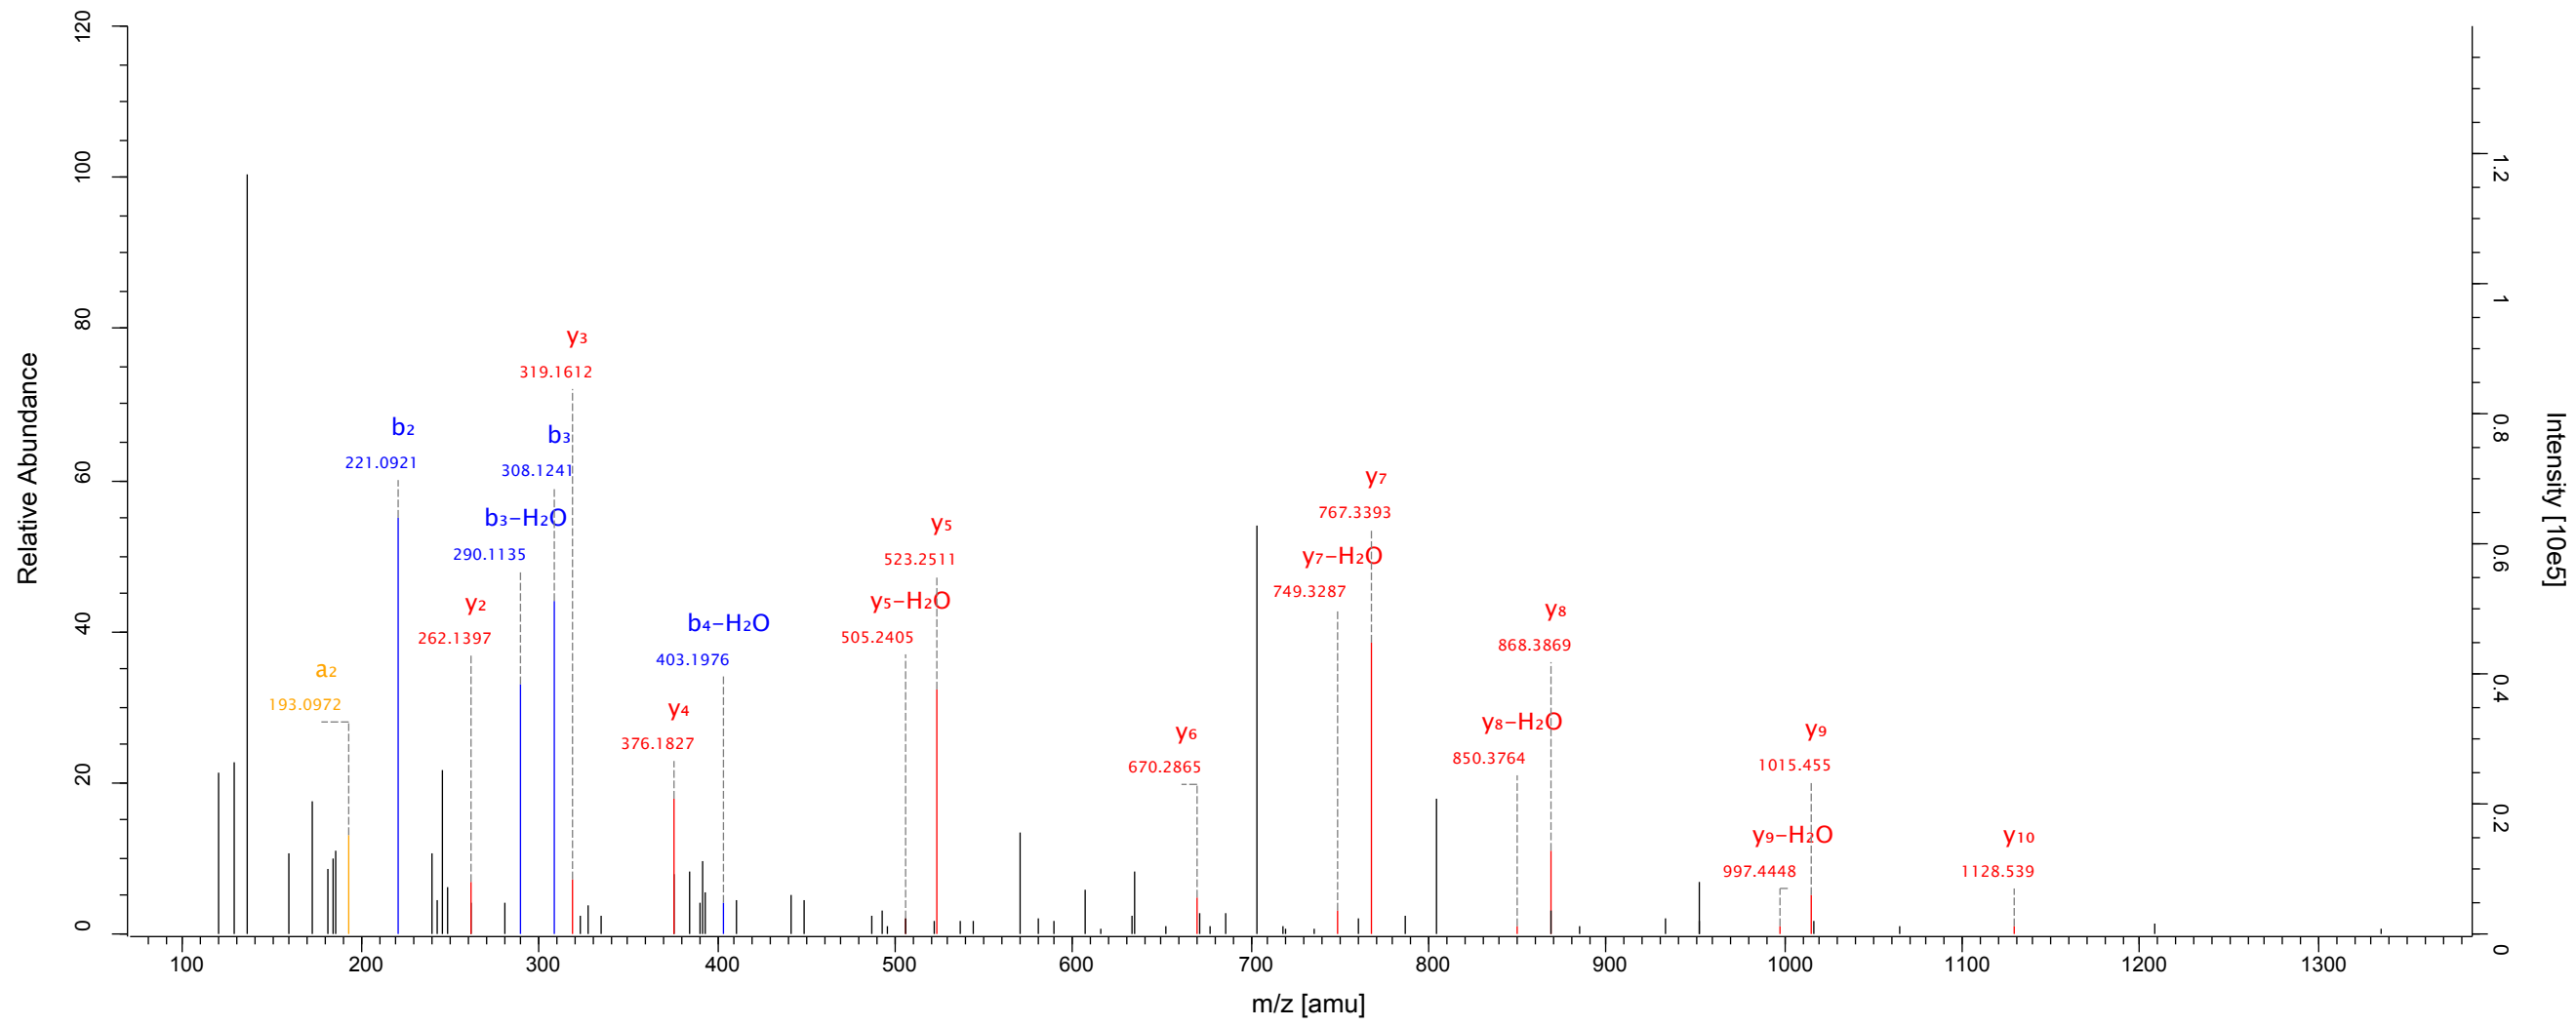

# peptide ID 32

Source: 20121106\_CO\_0340Gaje\_R02\_2  
Scannumber: 14976  
Protein: pep\_79; pep\_secretome\_159; pep\_secretome\_160; pep\_secretome\_161; pep\_secretome\_162  
Peptide Score: 79.82  
Method: FTMS; HCD; 1

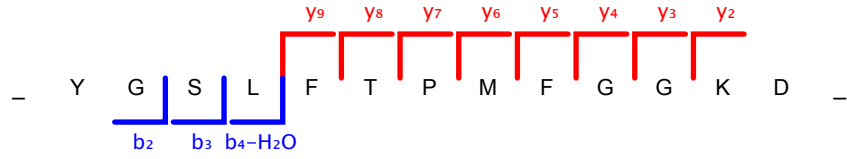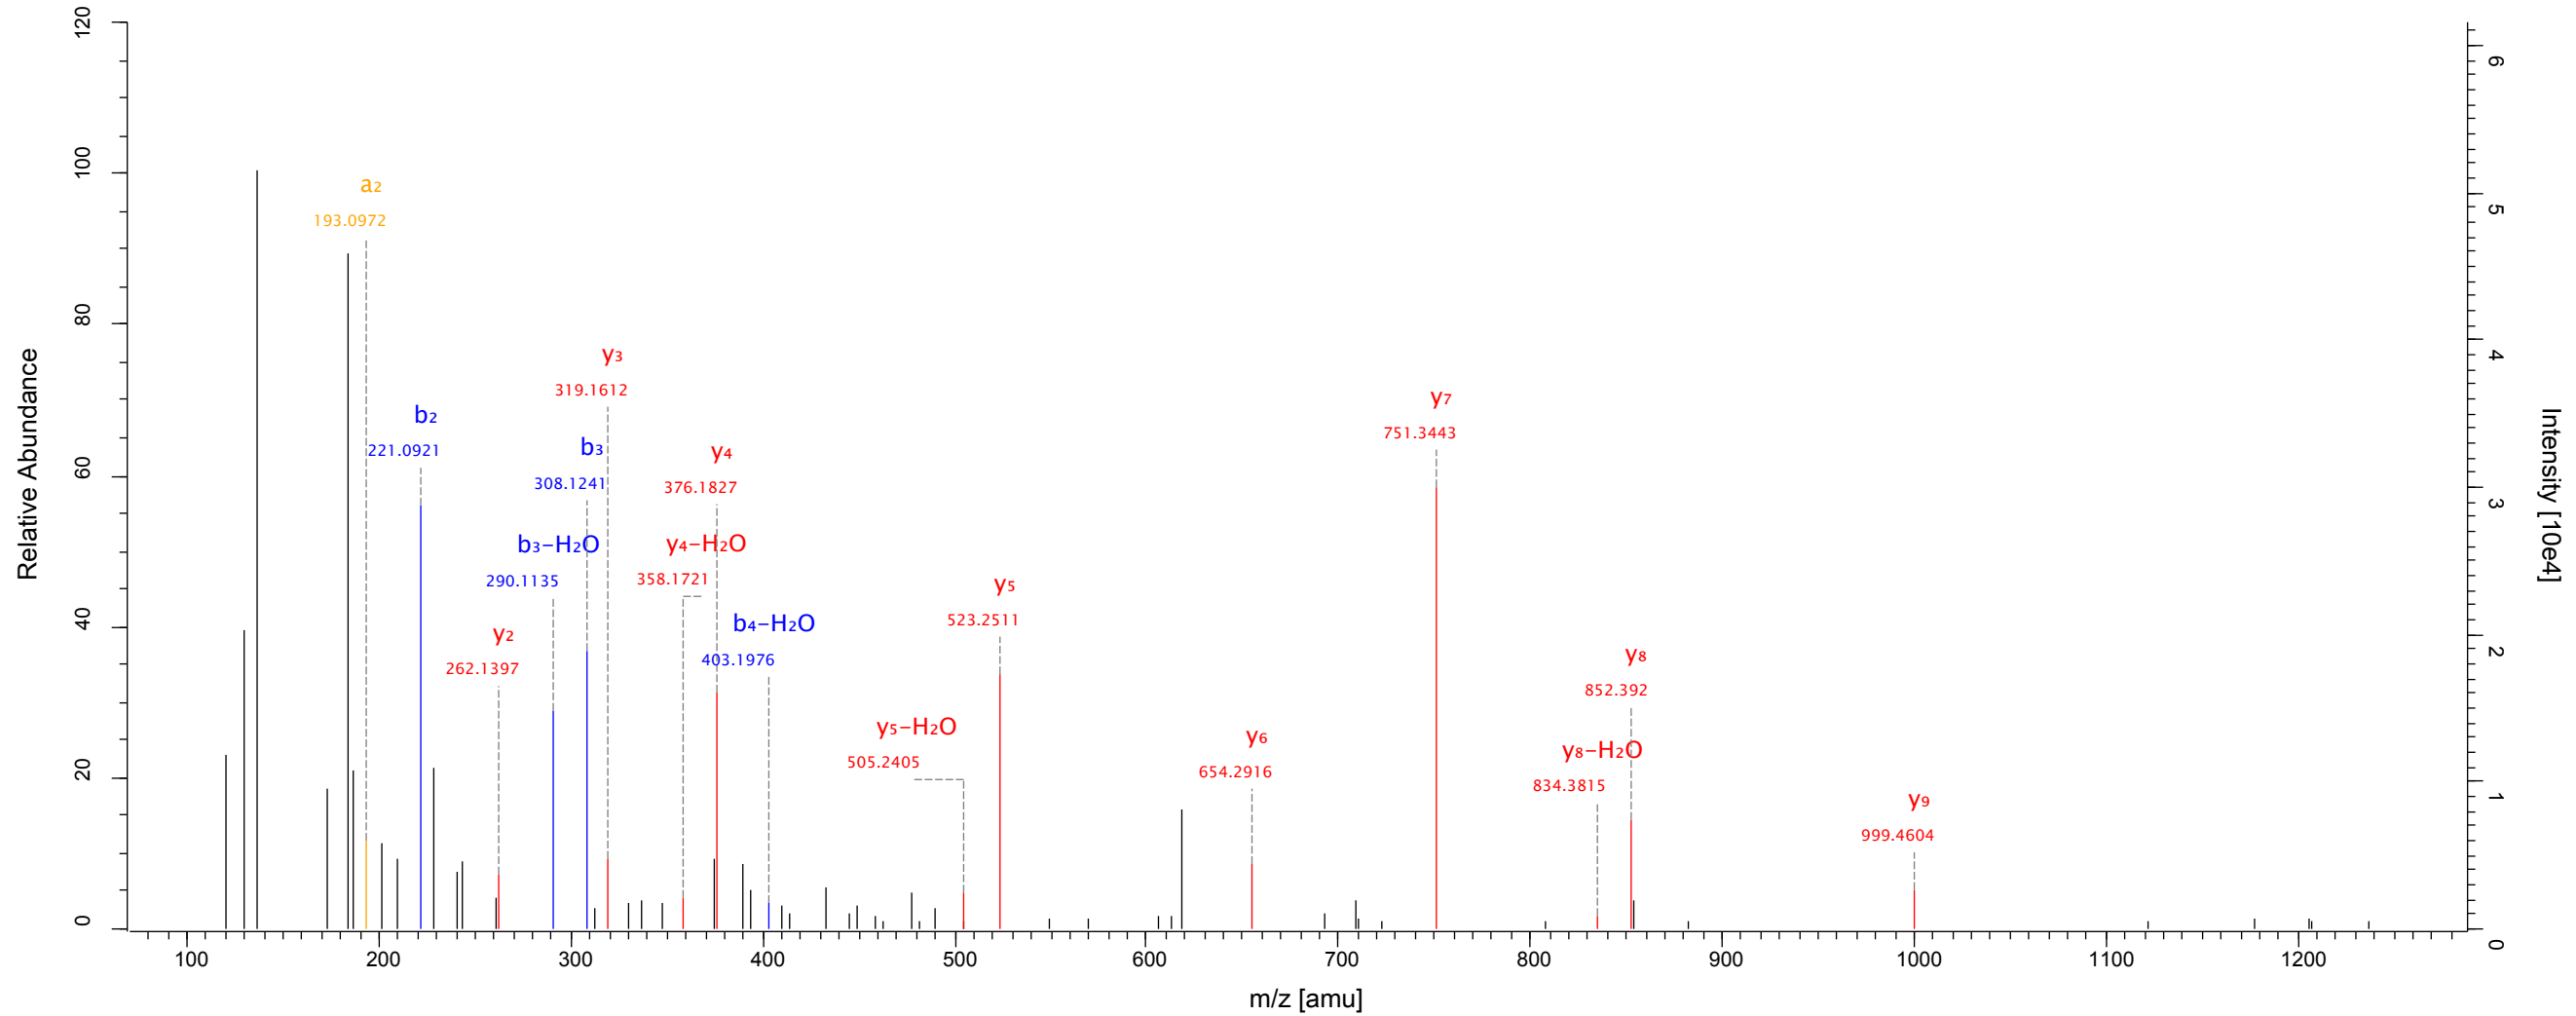

# peptide ID 33

Source: 20120515\_CO\_0340Gaje\_R01  
Scannumber: 17895  
Protein: orf\_7287; pep\_80; pep\_secretome\_164  
Peptide Score: 128.81  
Method: FTMS; HCD; 1

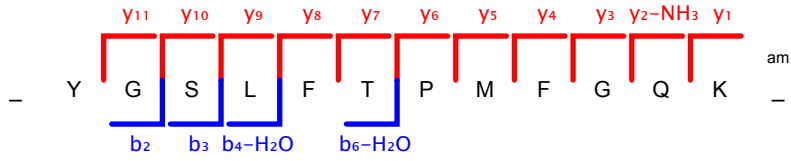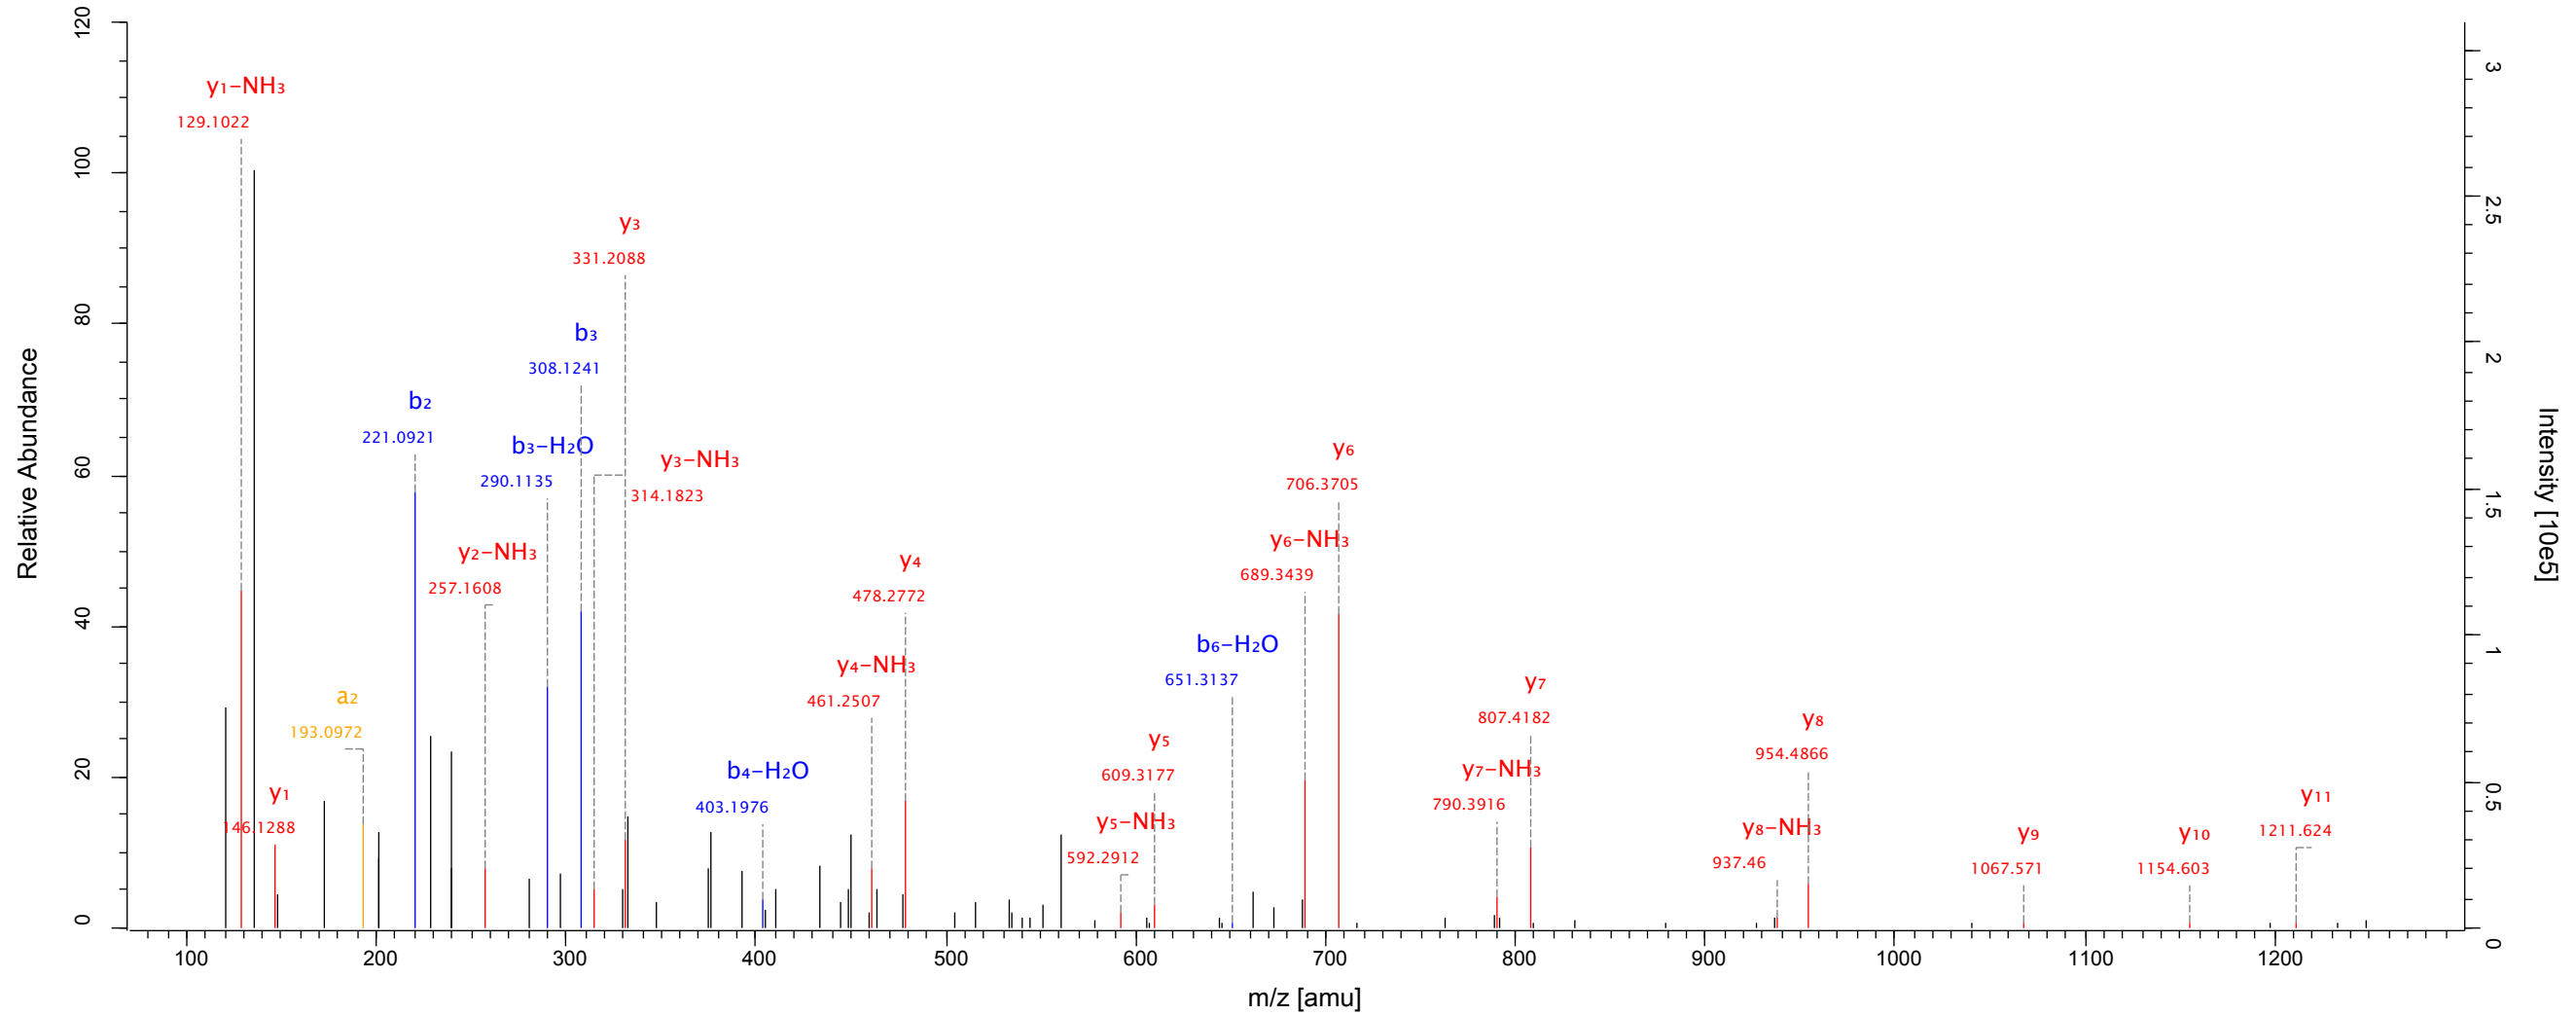

# peptide ID 34

Source: 20120816\_CO\_0340Gaje\_R02  
Scannumber: 13419  
Protein: orf\_7287; pep\_80; pep\_secretome\_164  
Peptide Score: 66.92  
Method: FTMS; HCD; 1

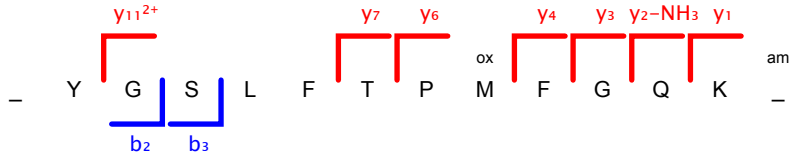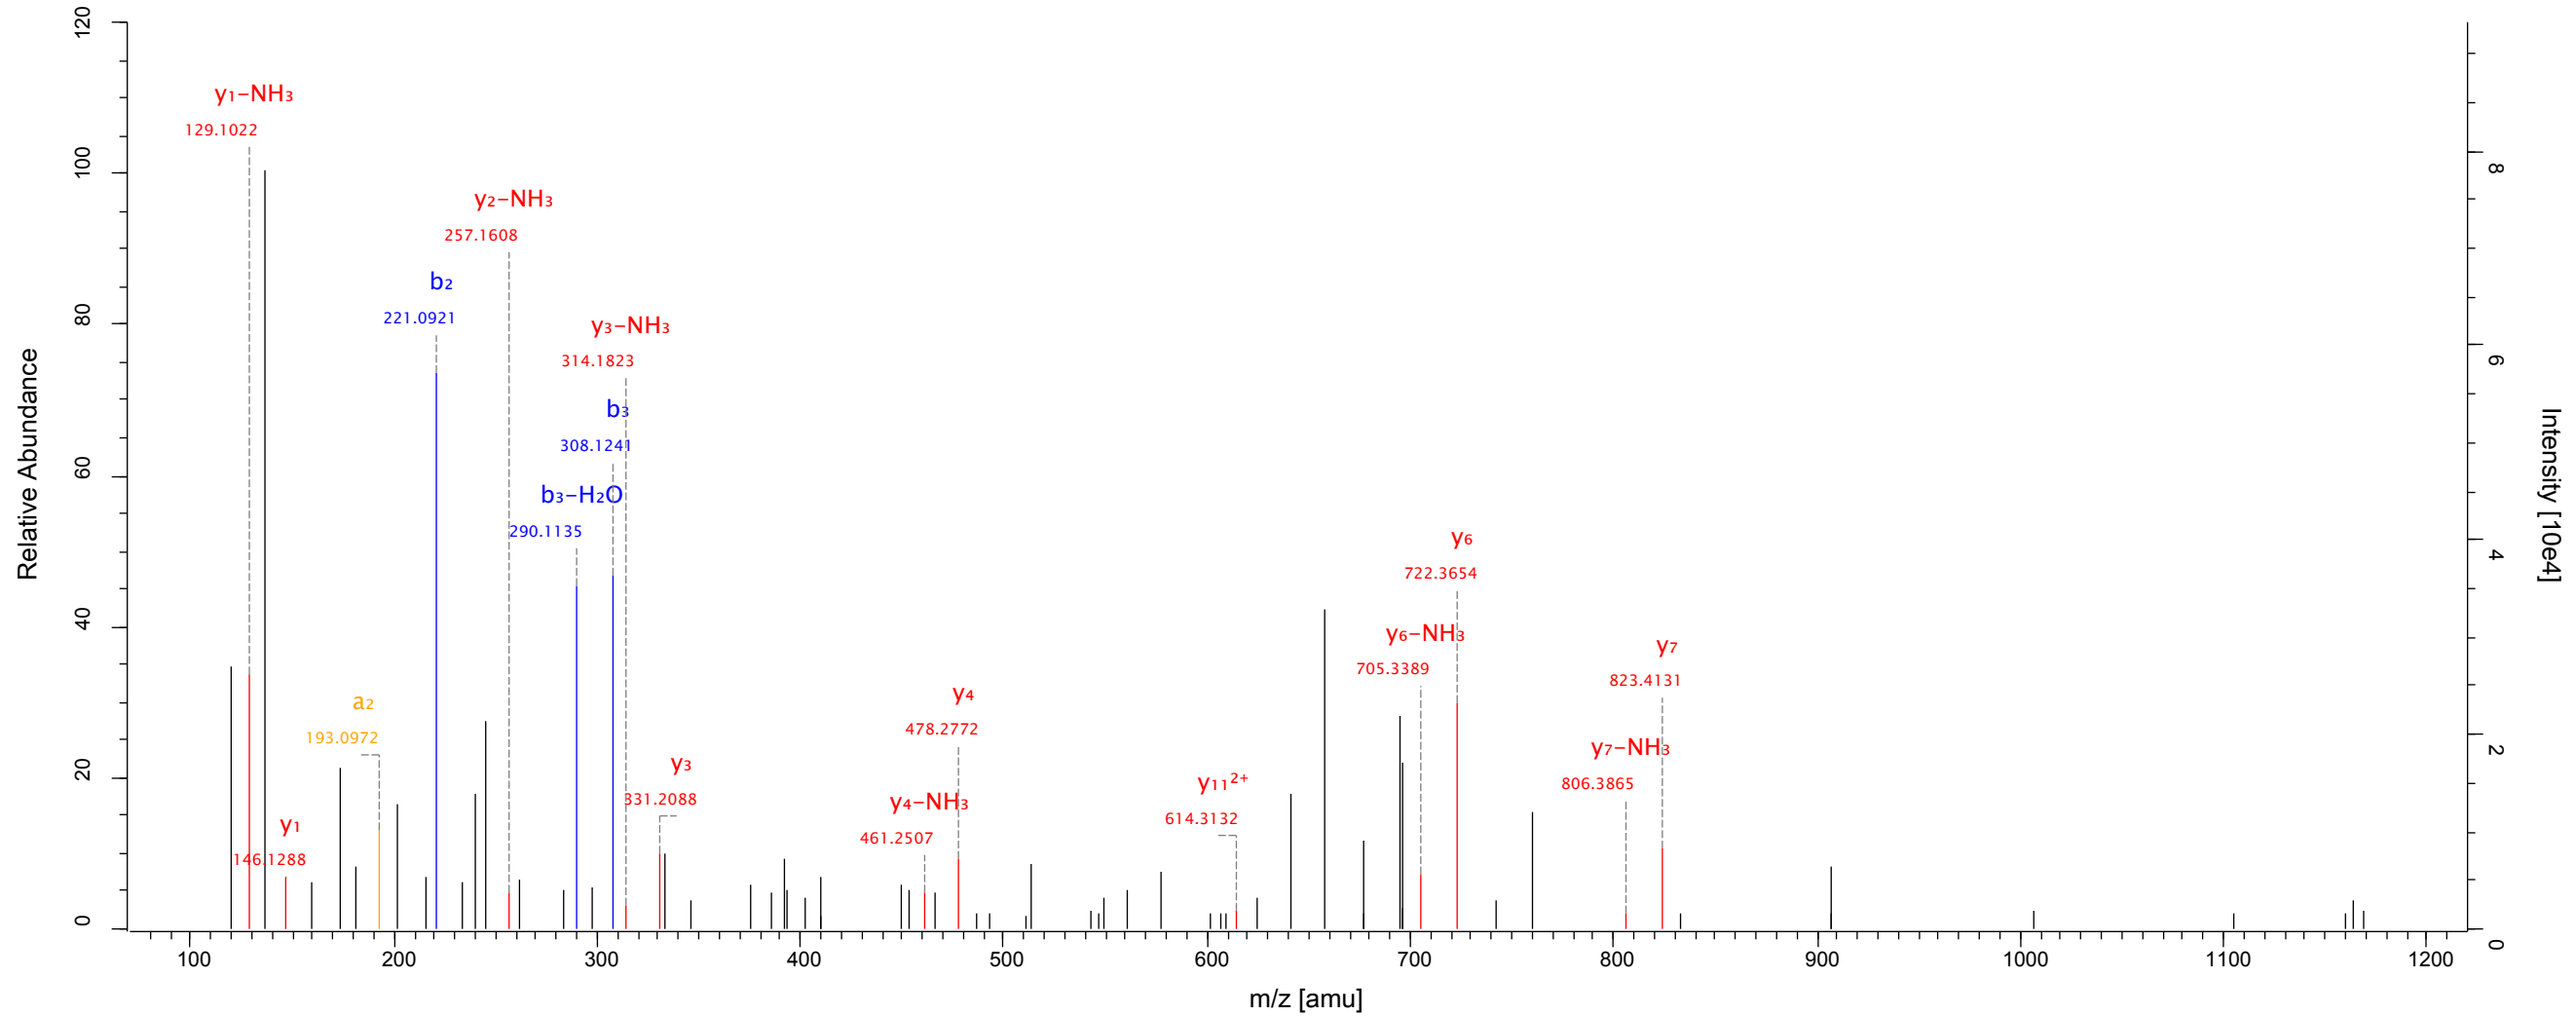

# peptide ID 35

Source: 20120816\_CO\_0340Gaje\_R02  
Scannumber: 10065  
Protein: pep\_81; pep\_secretome\_165  
Peptide Score: 40.8  
Method: FTMS; HCD; 1

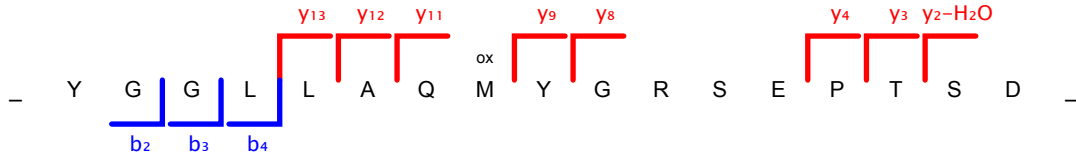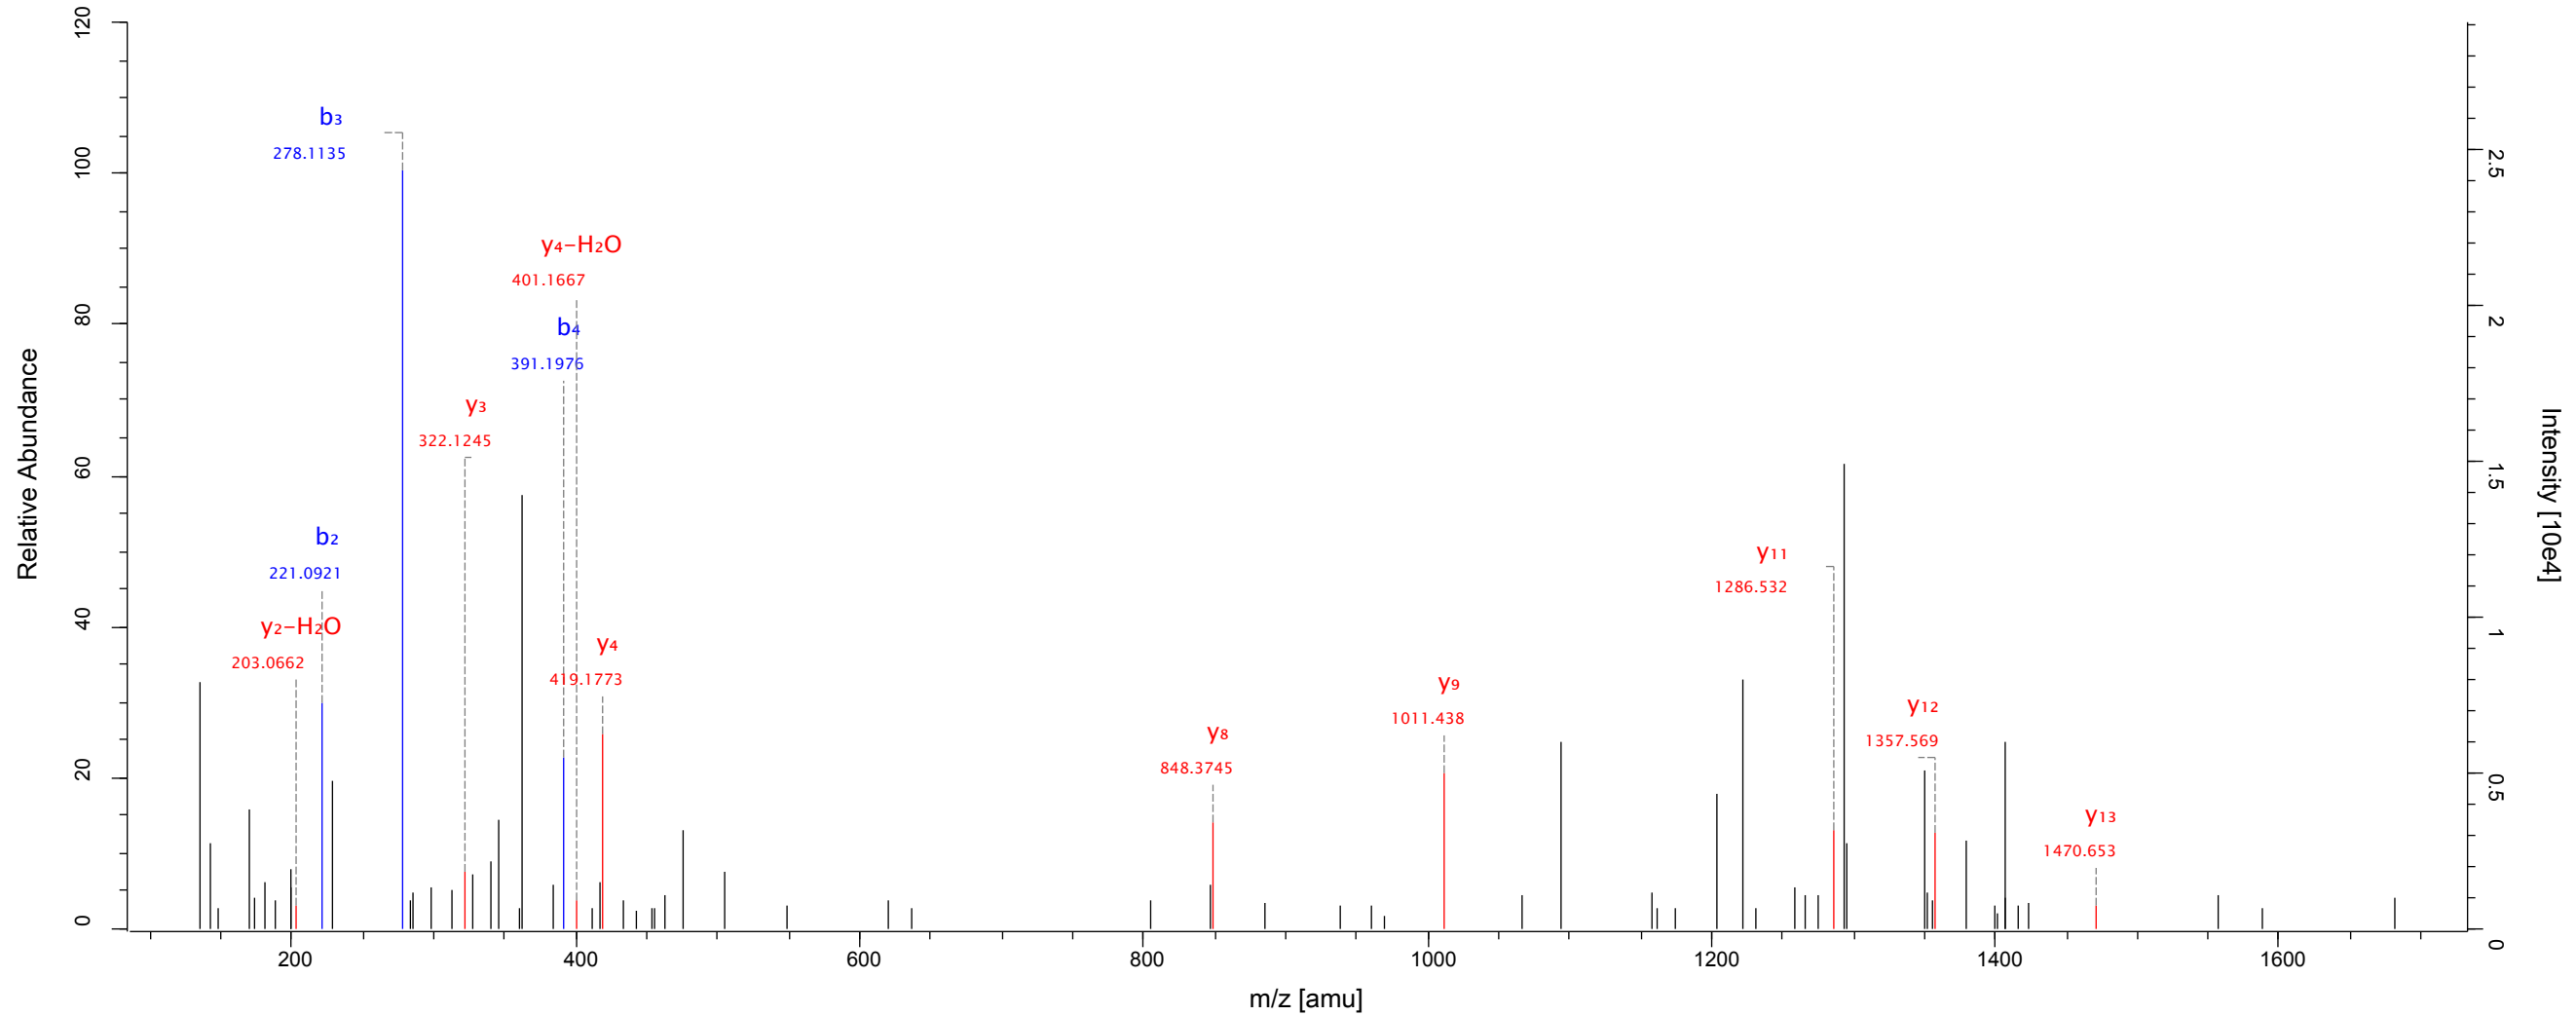

# peptide ID 36

Source: 20120816\_CO\_0340Gaje\_R02  
Scannumber: 8501  
Protein: pep\_secretome\_15637; pep\_secretome\_83592  
Peptide Score: 90.61  
Method: FTMS; HCD; 1

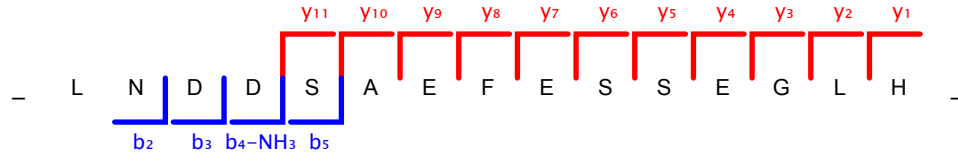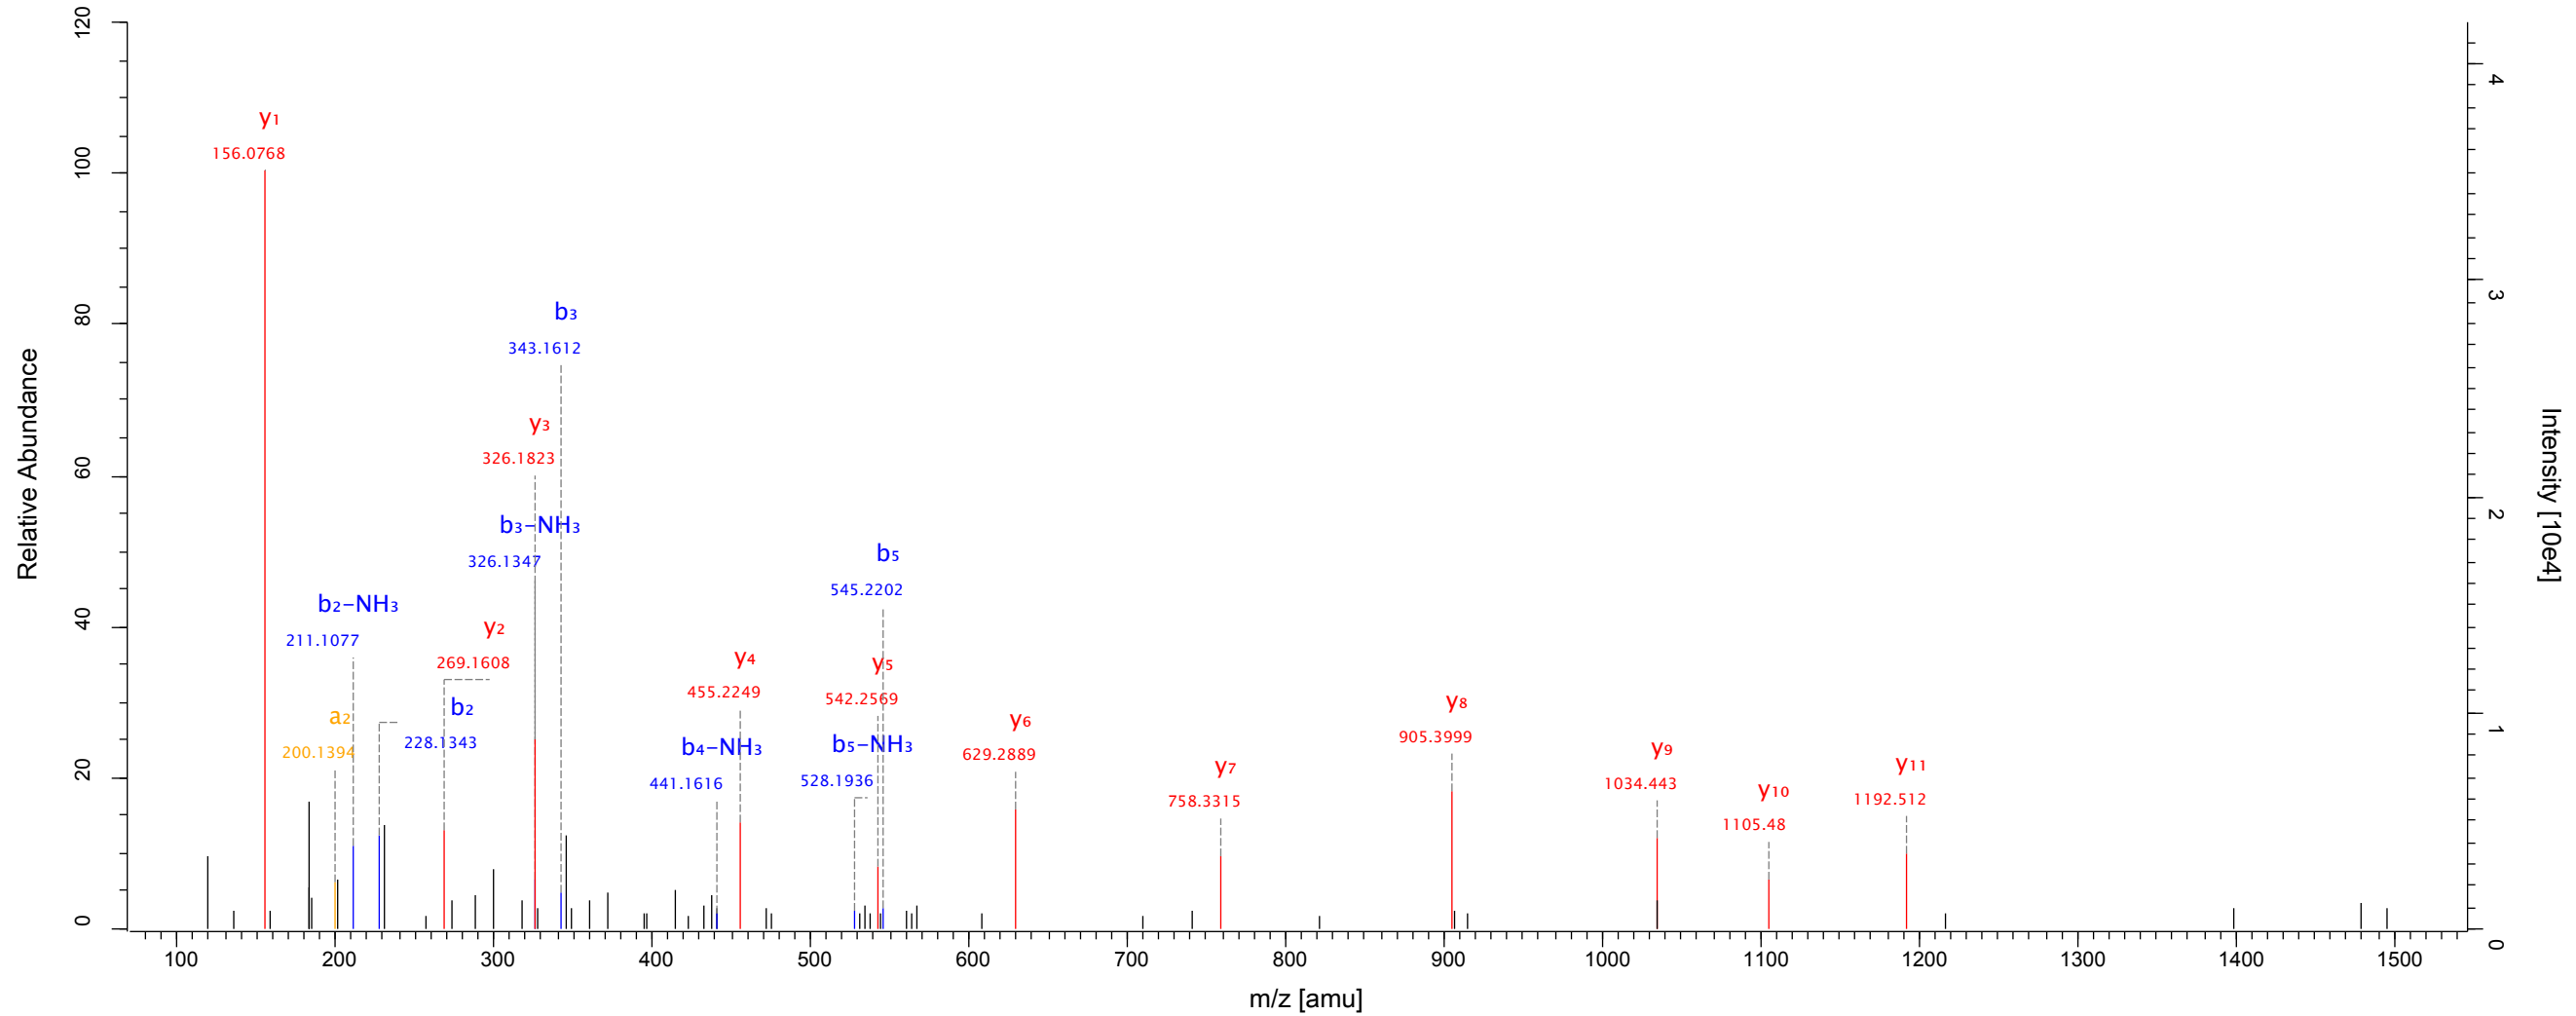



# peptide ID 37

Source: 20120515\_CO\_0340Gaje\_R01  
Scannumber: 20753  
Protein: pep\_secretome\_15649  
Peptide Score: 67.86  
Method: FTMS; HCD; 1

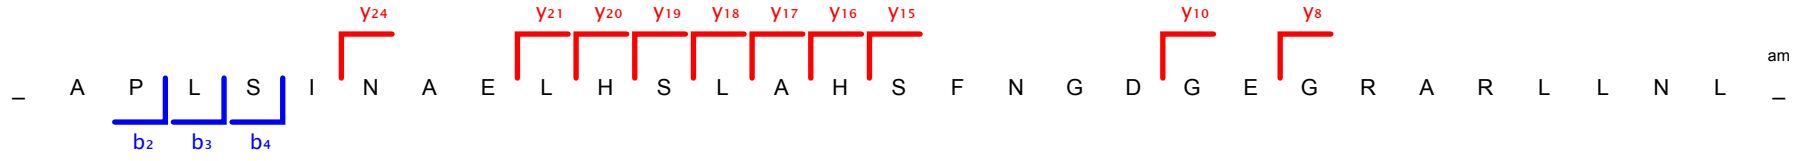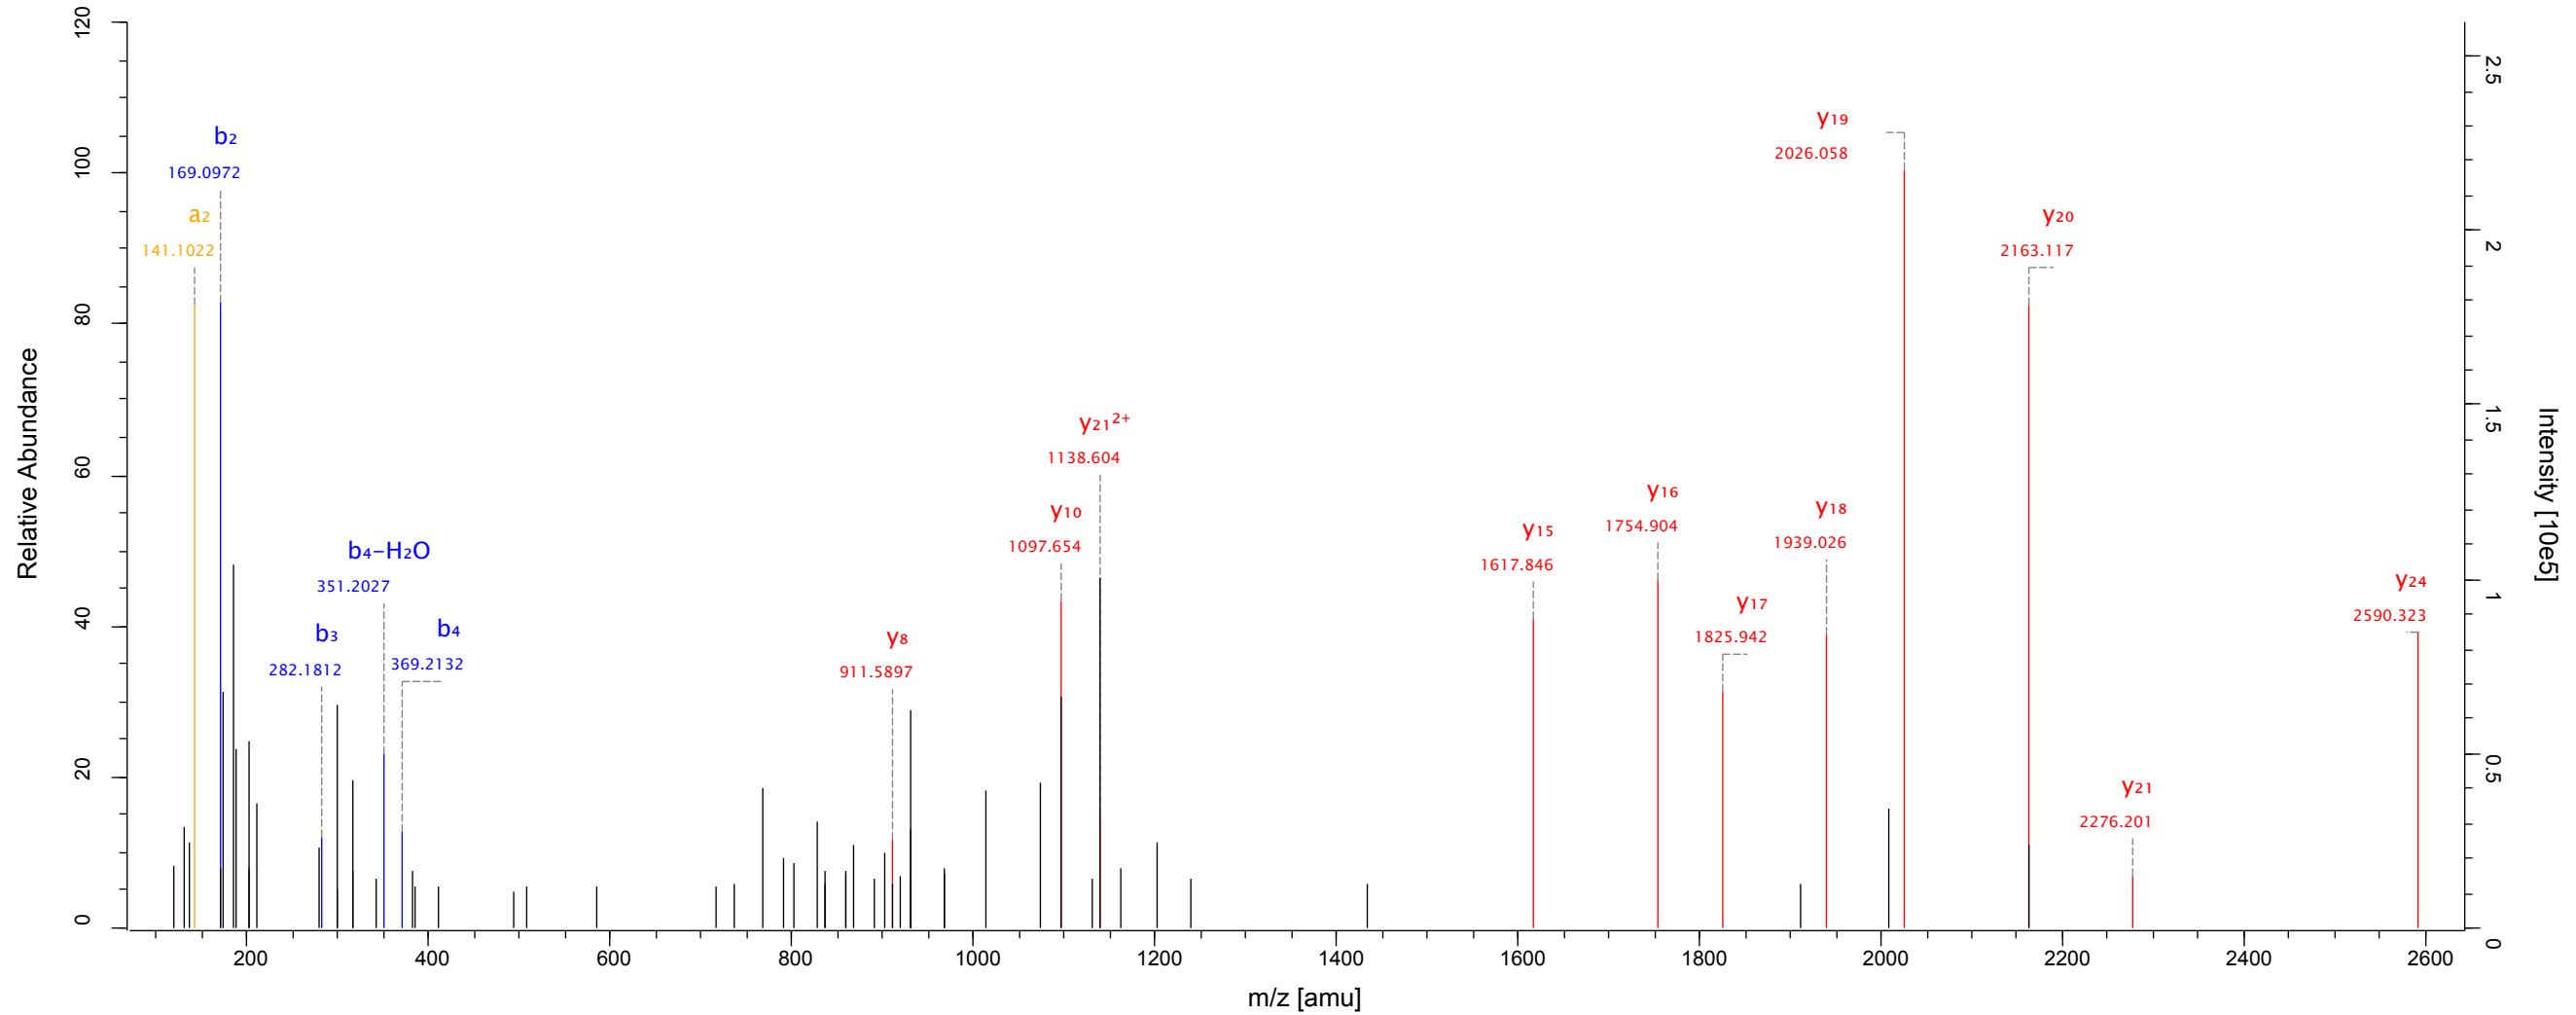

# peptide ID 38

Source: 20120816\_CO\_0340Gaje\_R02  
Scannumber: 15198  
Protein: pep\_secretome\_5102  
Peptide Score: 106.58  
Method: FTMS; HCD; 1

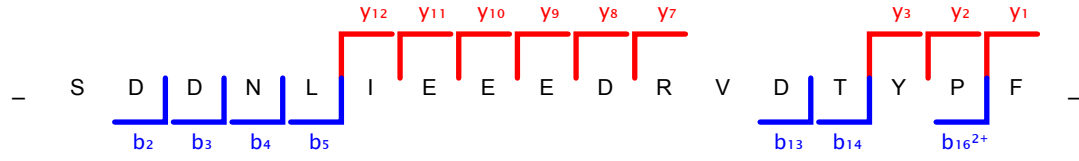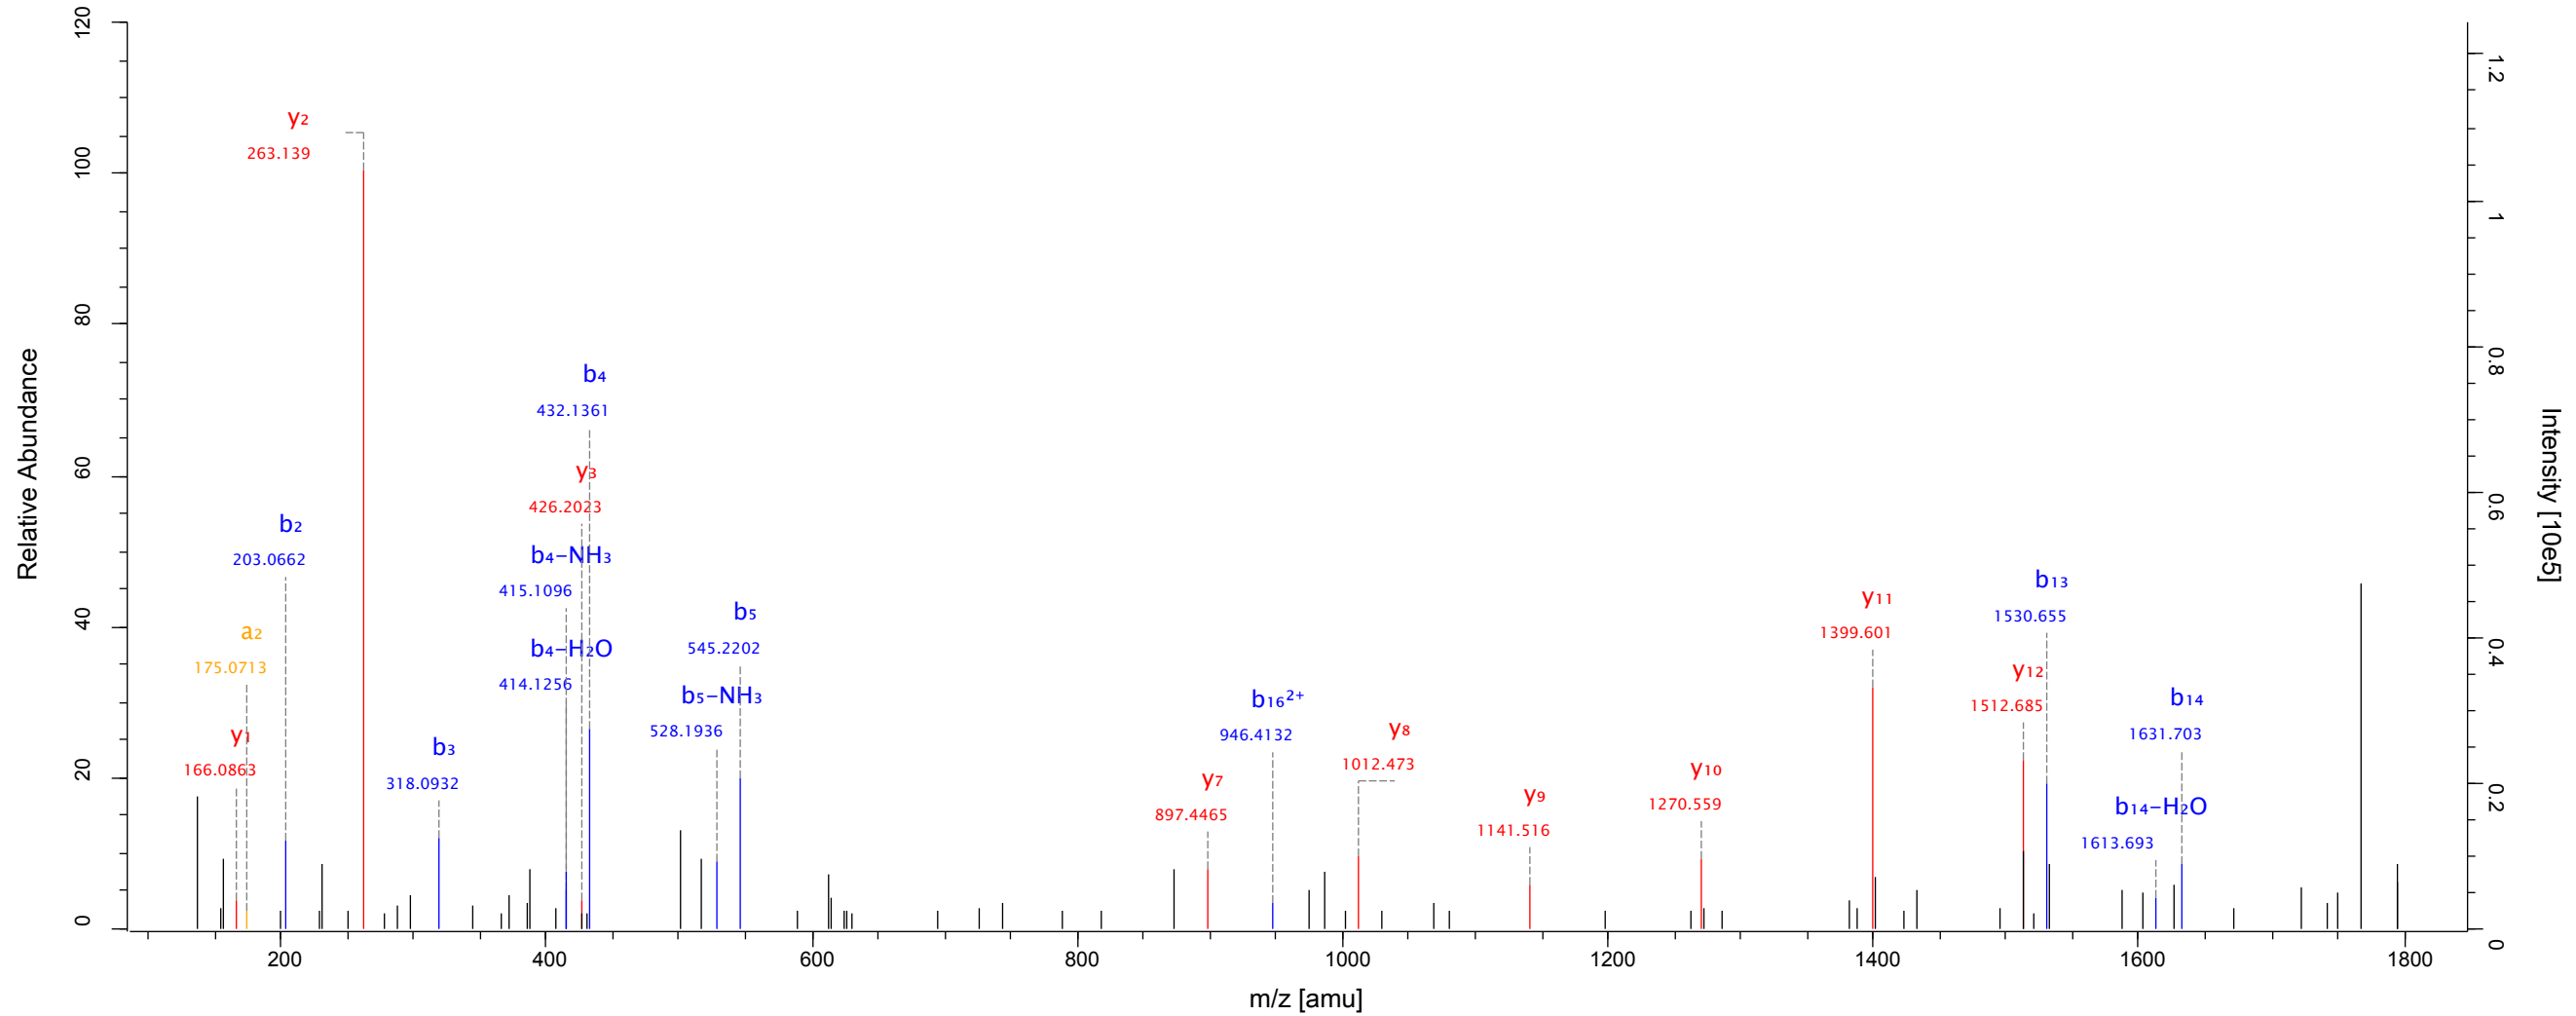

# peptide ID 39

Source: 20120816\_CO\_0340Gaje\_R02  
Scannumber: 6737  
Protein: SinglePep88  
Peptide Score: 107.15  
Method: FTMS; HCD; 1

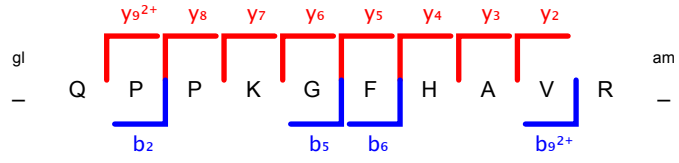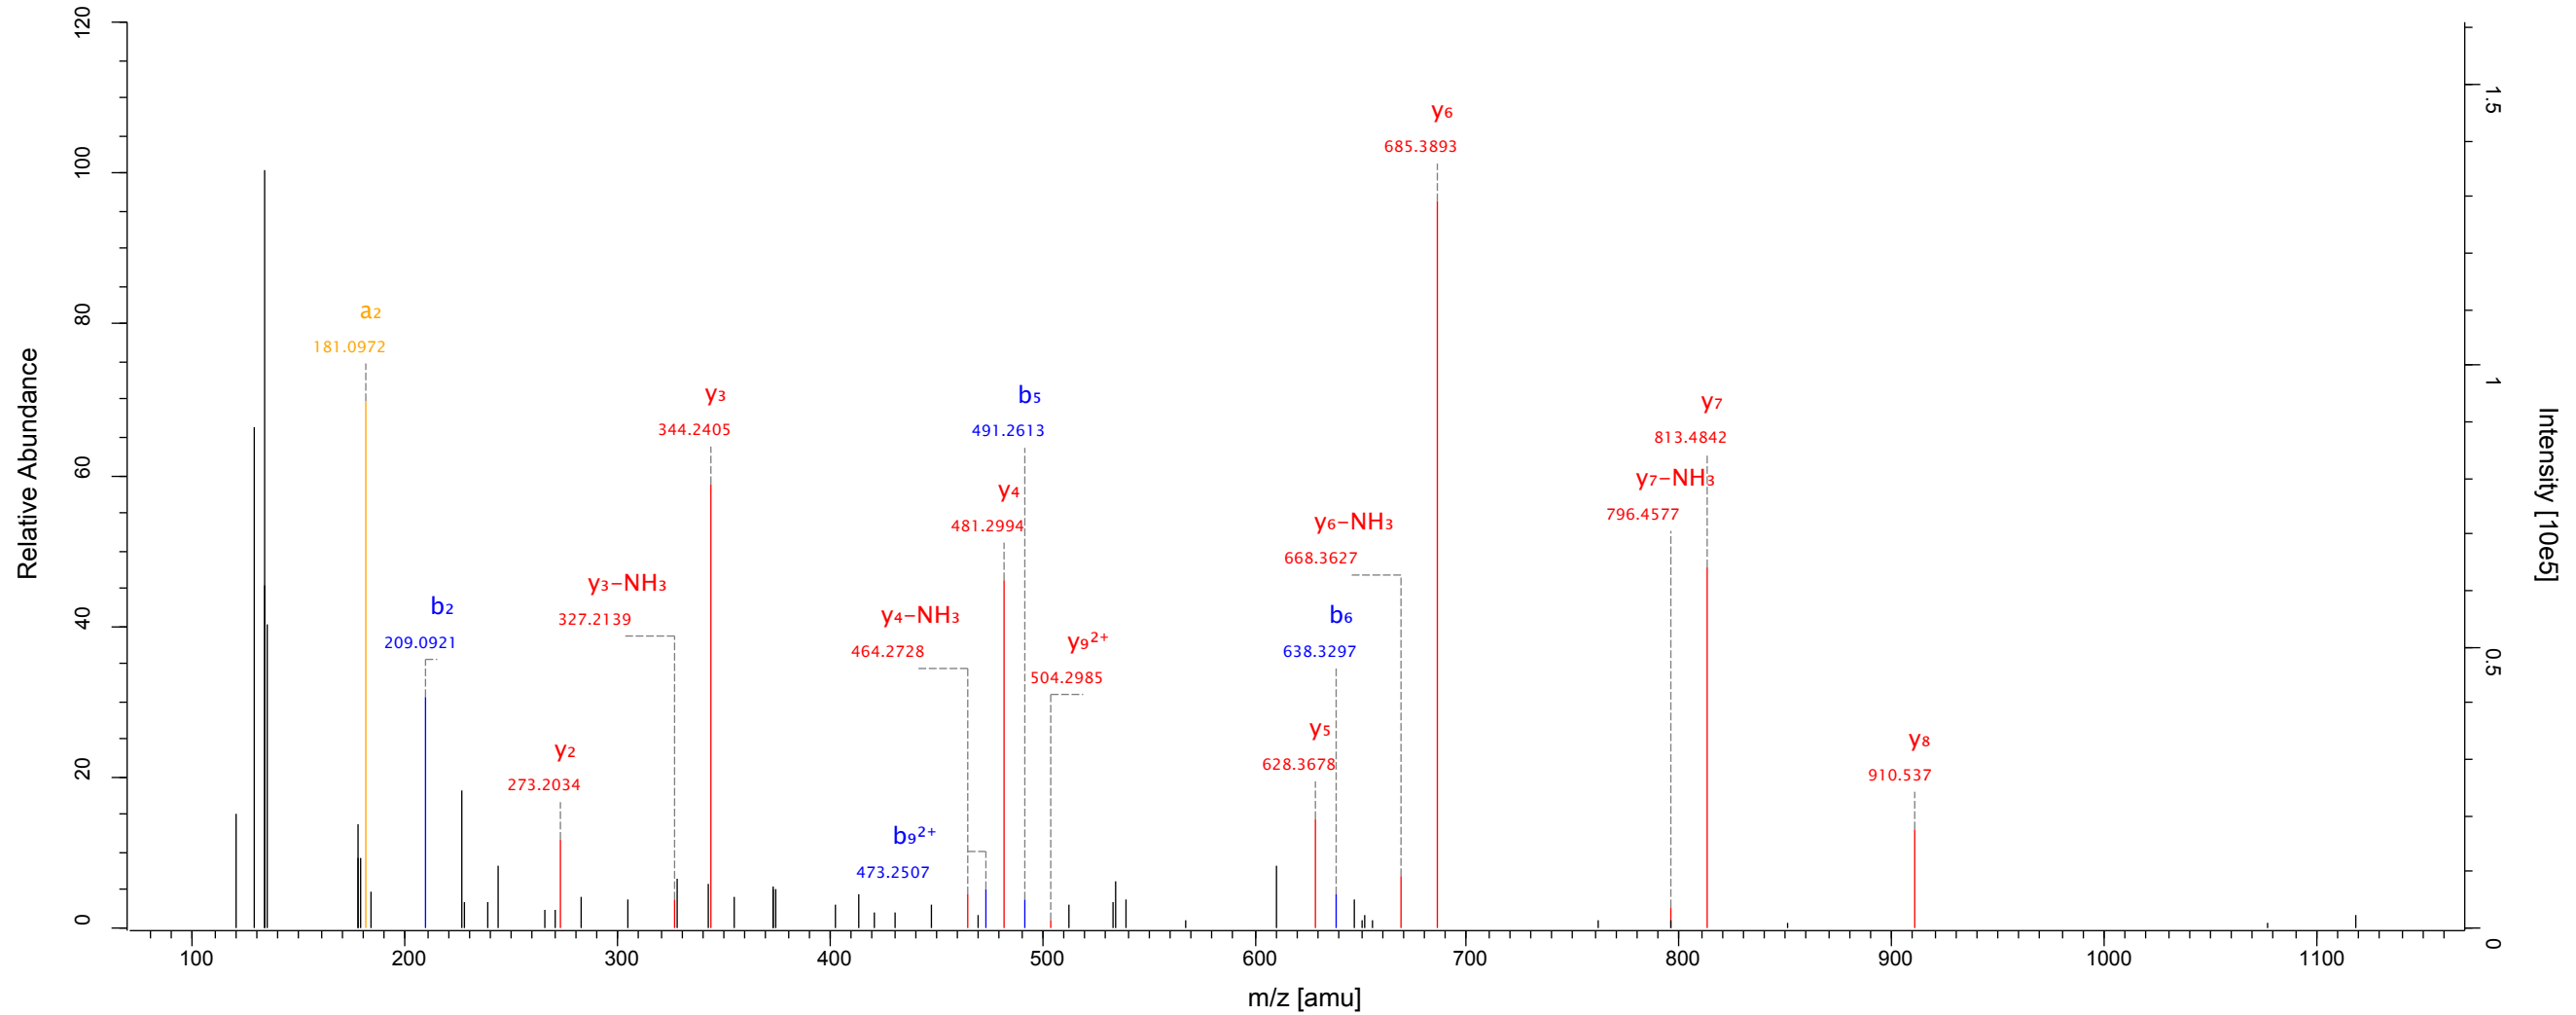

# peptide ID 40

Source: 20120515\_CO\_0340Gaje\_R01  
Scannumber: 11864  
Protein: SinglePep87  
Peptide Score: 147.2  
Method: FTMS; HCD; 1

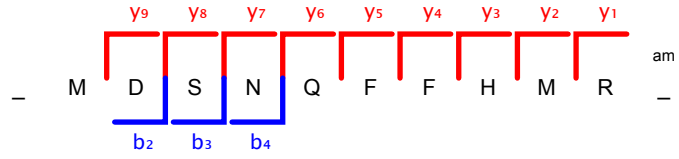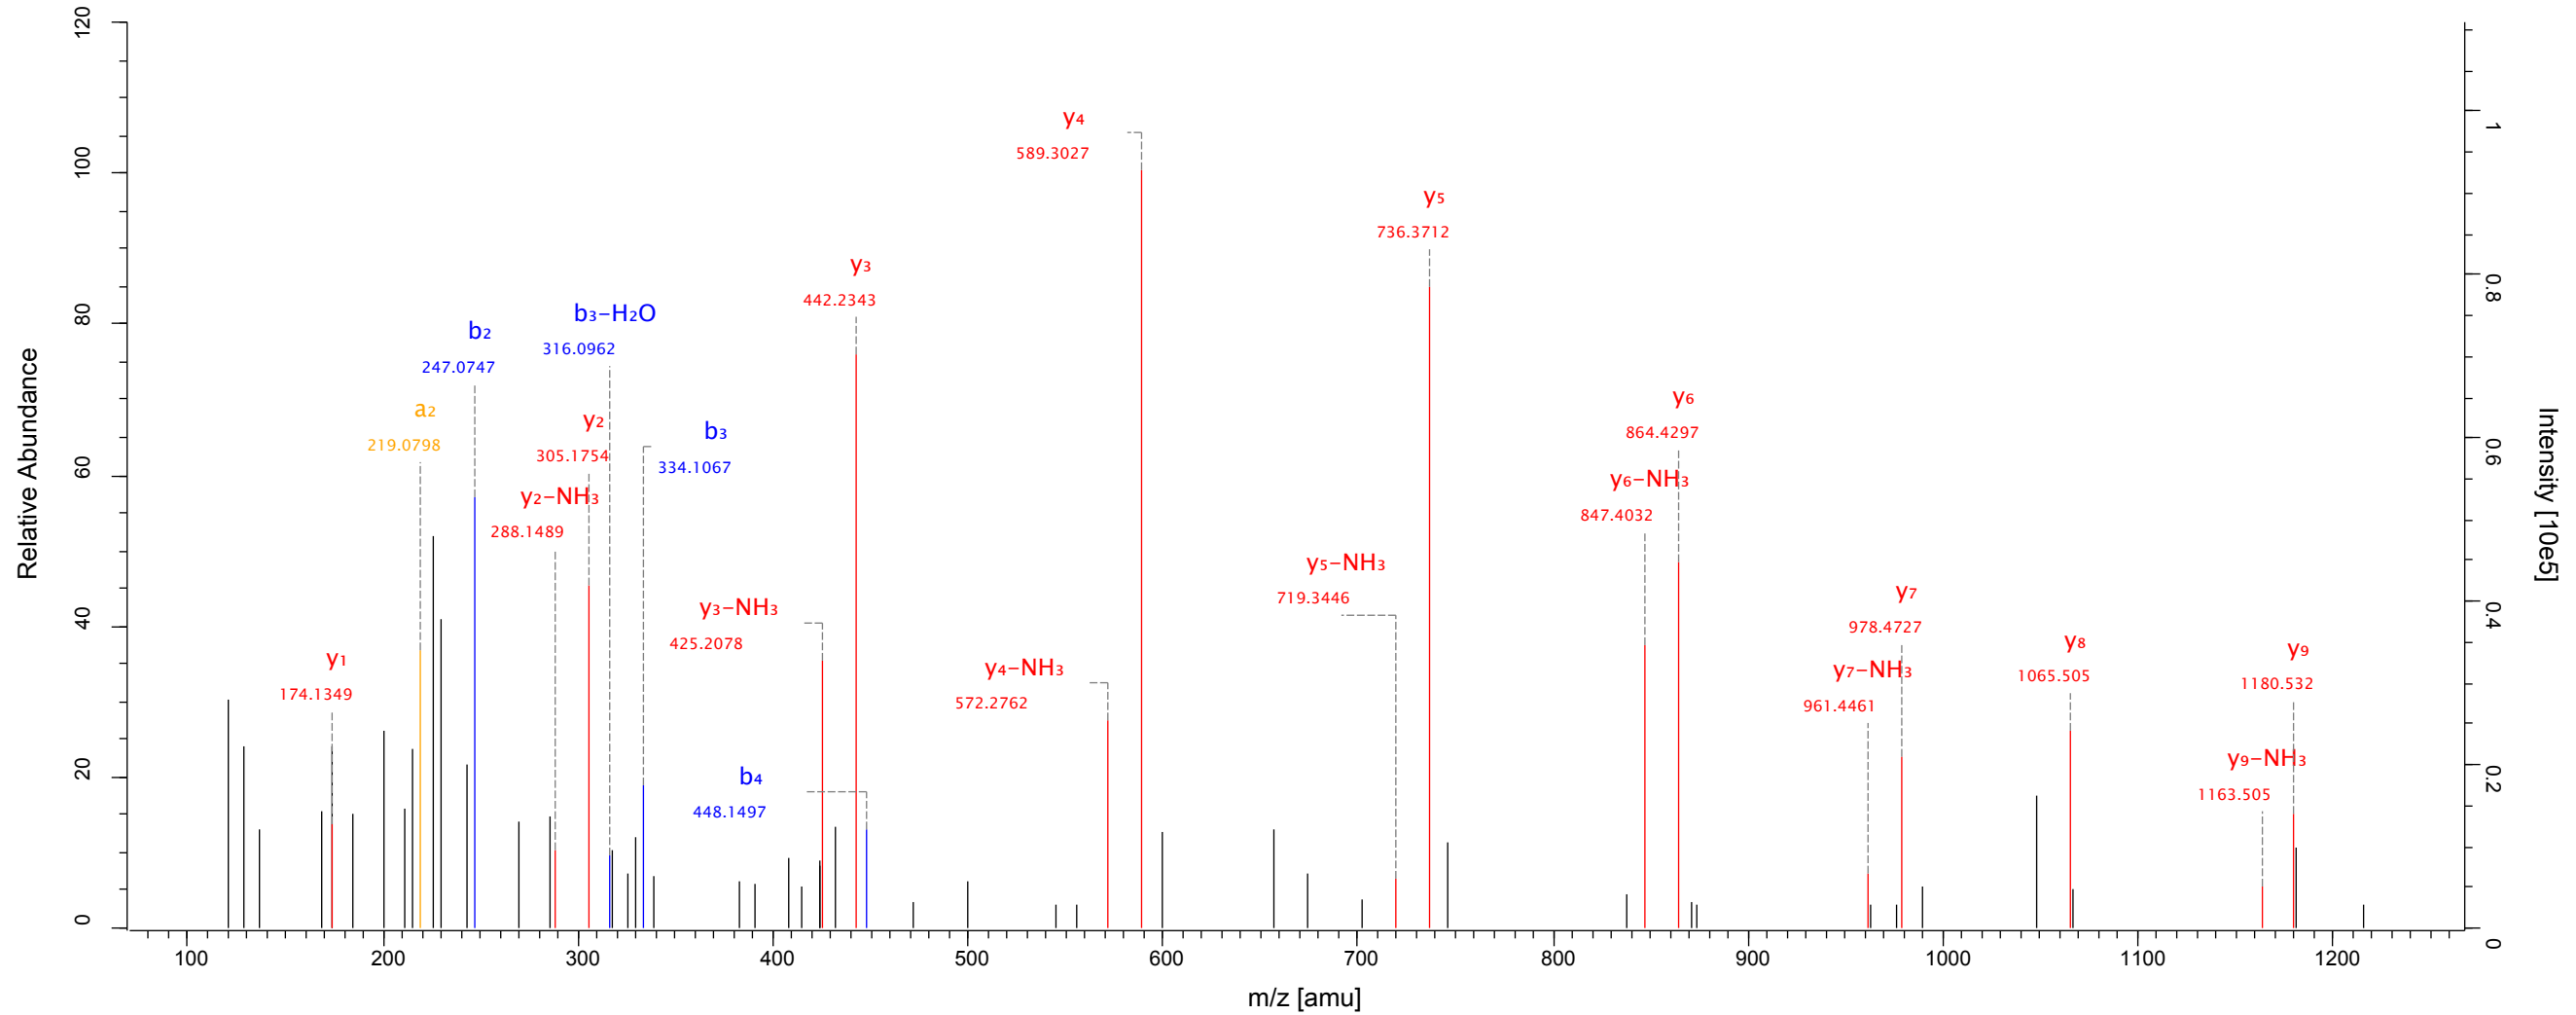

# peptide ID 41

Source: 20120515\_CO\_0340Gaje\_R01  
Scannumber: 14110  
Protein: pep\_207; pep\_secretome\_10076; pep\_secretome\_10077; pep\_secretome\_63153; pep\_secretome\_63154  
Peptide Score: 137.89  
Method: FTMS; HCD; 1

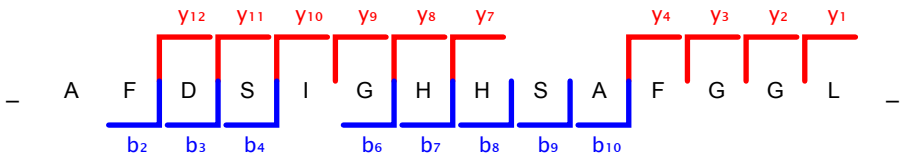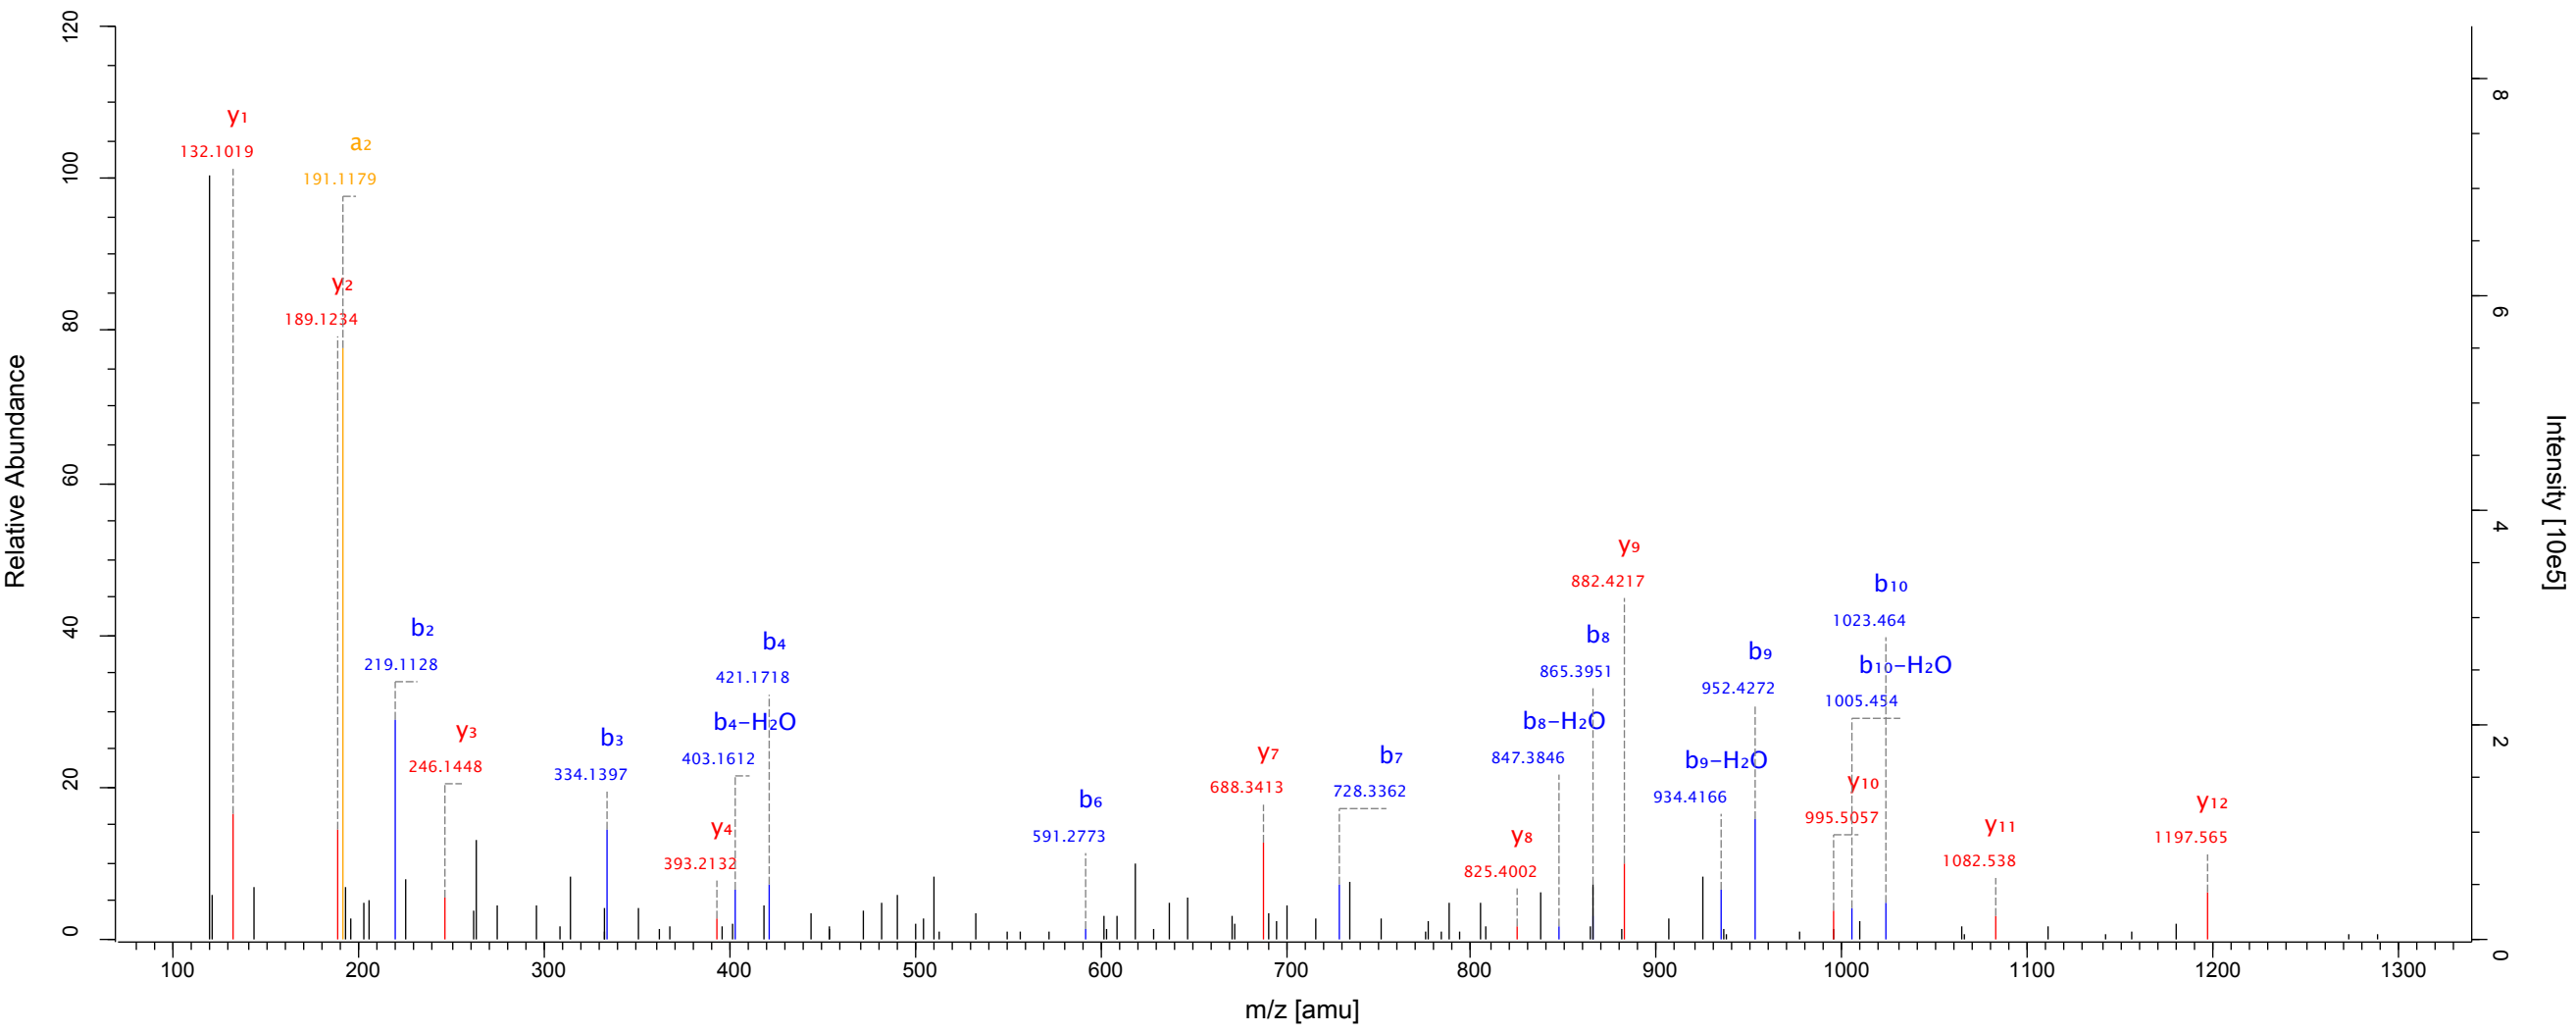

# peptide ID 42

Source: 20120816\_CO\_0340Gaje\_R02

Scannumber: 12365

Protein: orf\_9630; pep\_208; pep\_secretome\_10078; pep\_secretome\_10083; pep\_secretome\_10084; pep\_secretome\_10085; pep\_secretome\_10087; pep\_secretome\_10088; pep\_secretome\_10090; pep\_secretome\_10093; pep\_secretome\_10099; pep\_secretome\_10101

Peptide Score: 103.76

Method: FTMS; HCD; 1

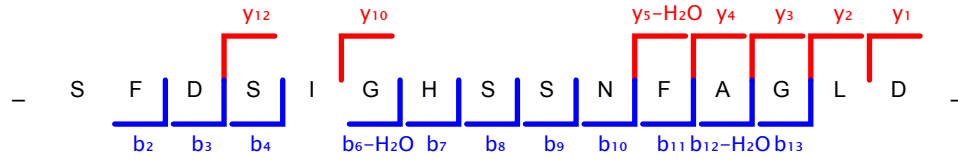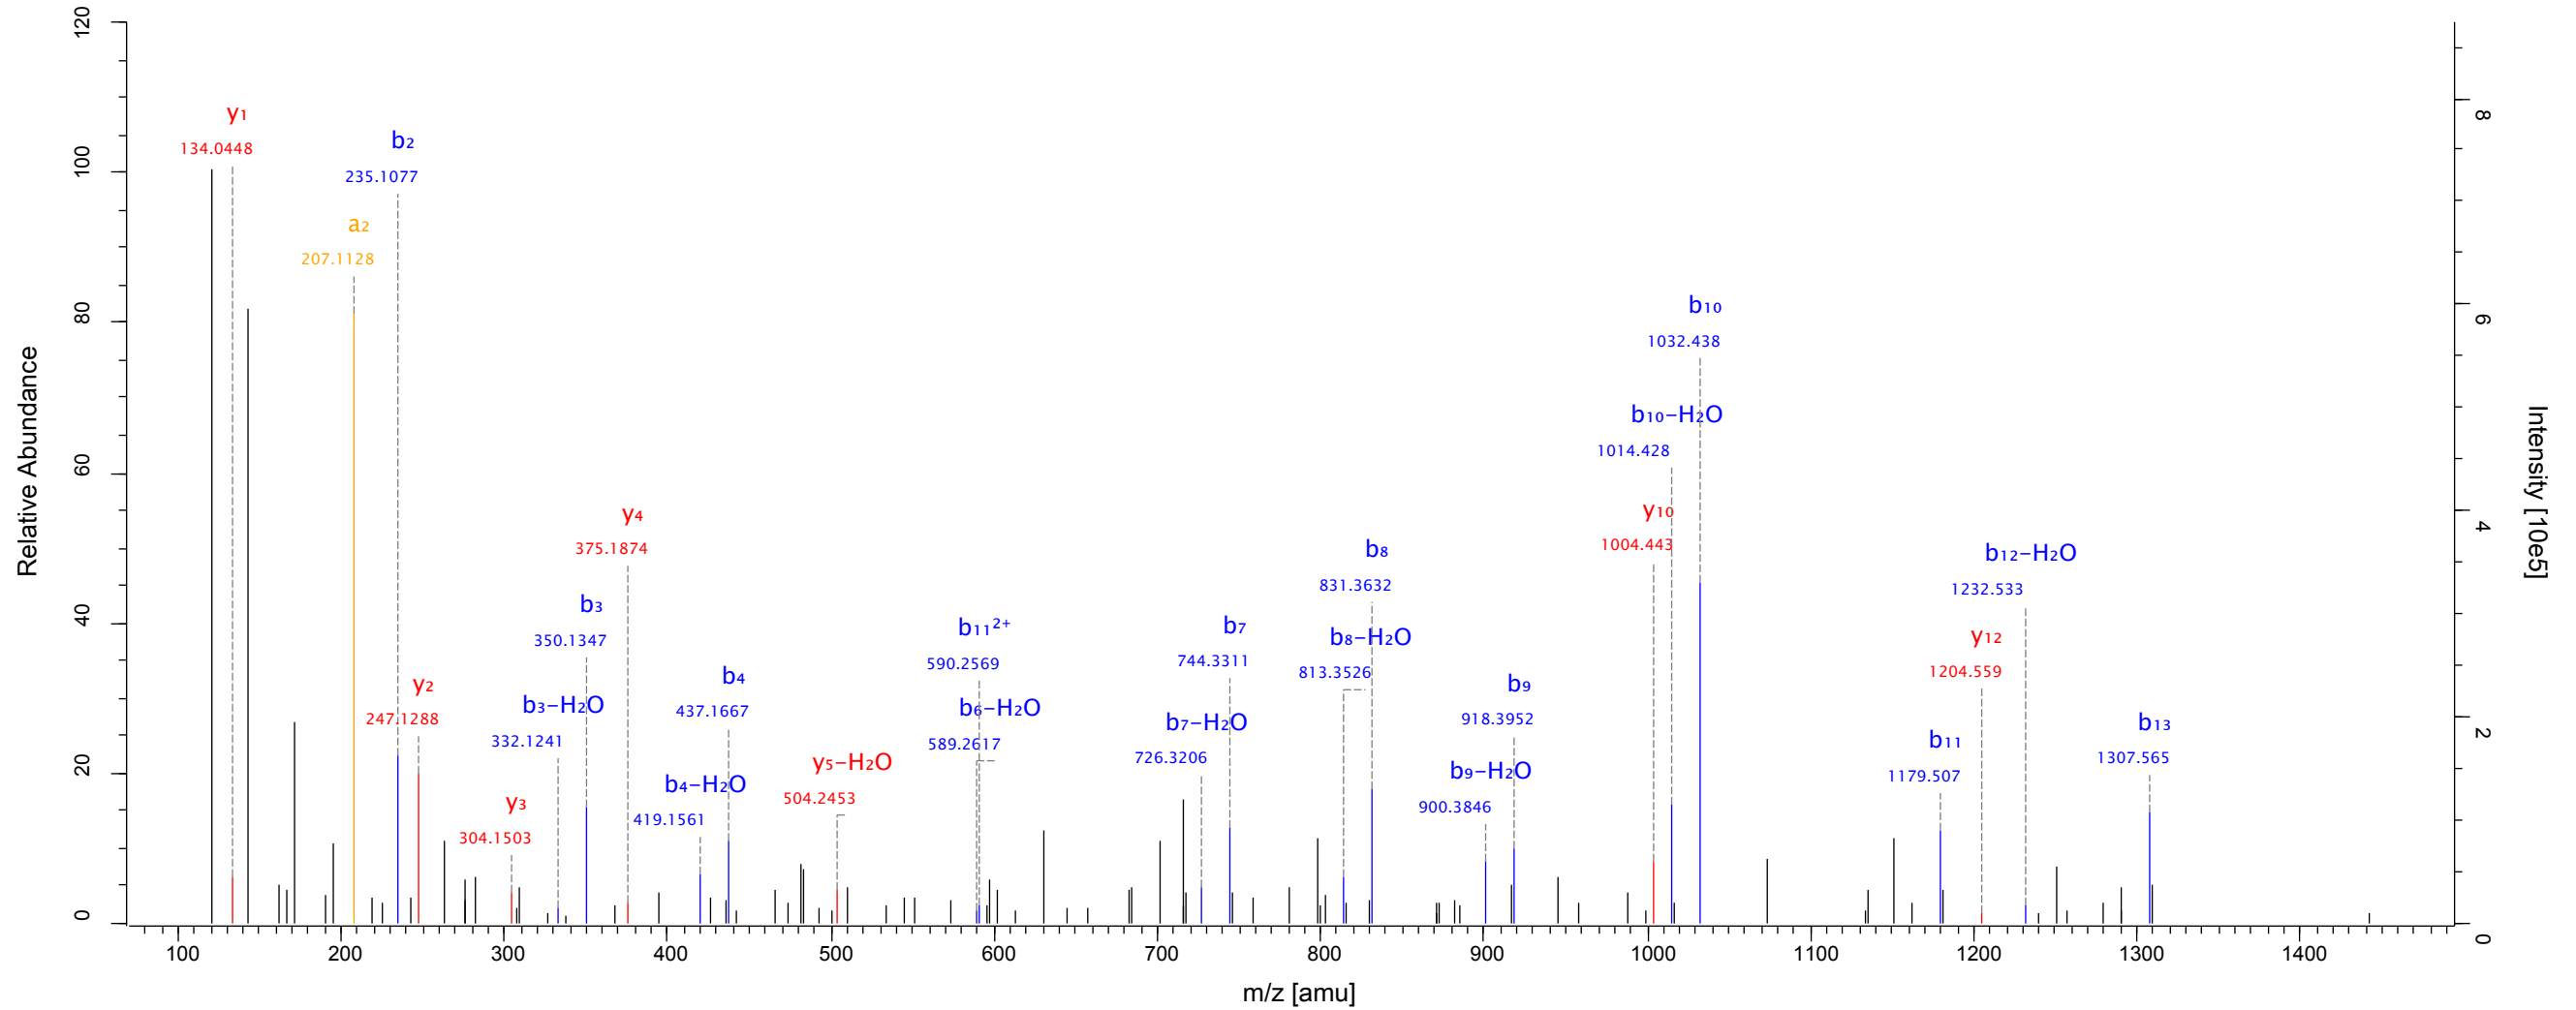

# peptide ID 43

Source: 20120515\_CO\_0340Gaje\_R01  
Scannumber: 16566  
Protein: orf\_46468  
Peptide Score: 83.14  
Method: FTMS; HCD; 1

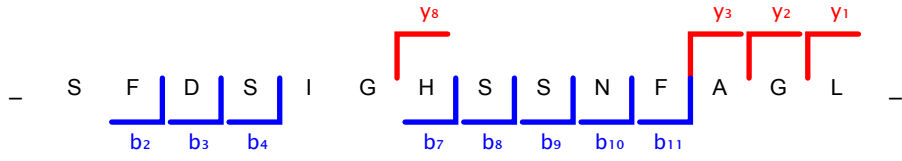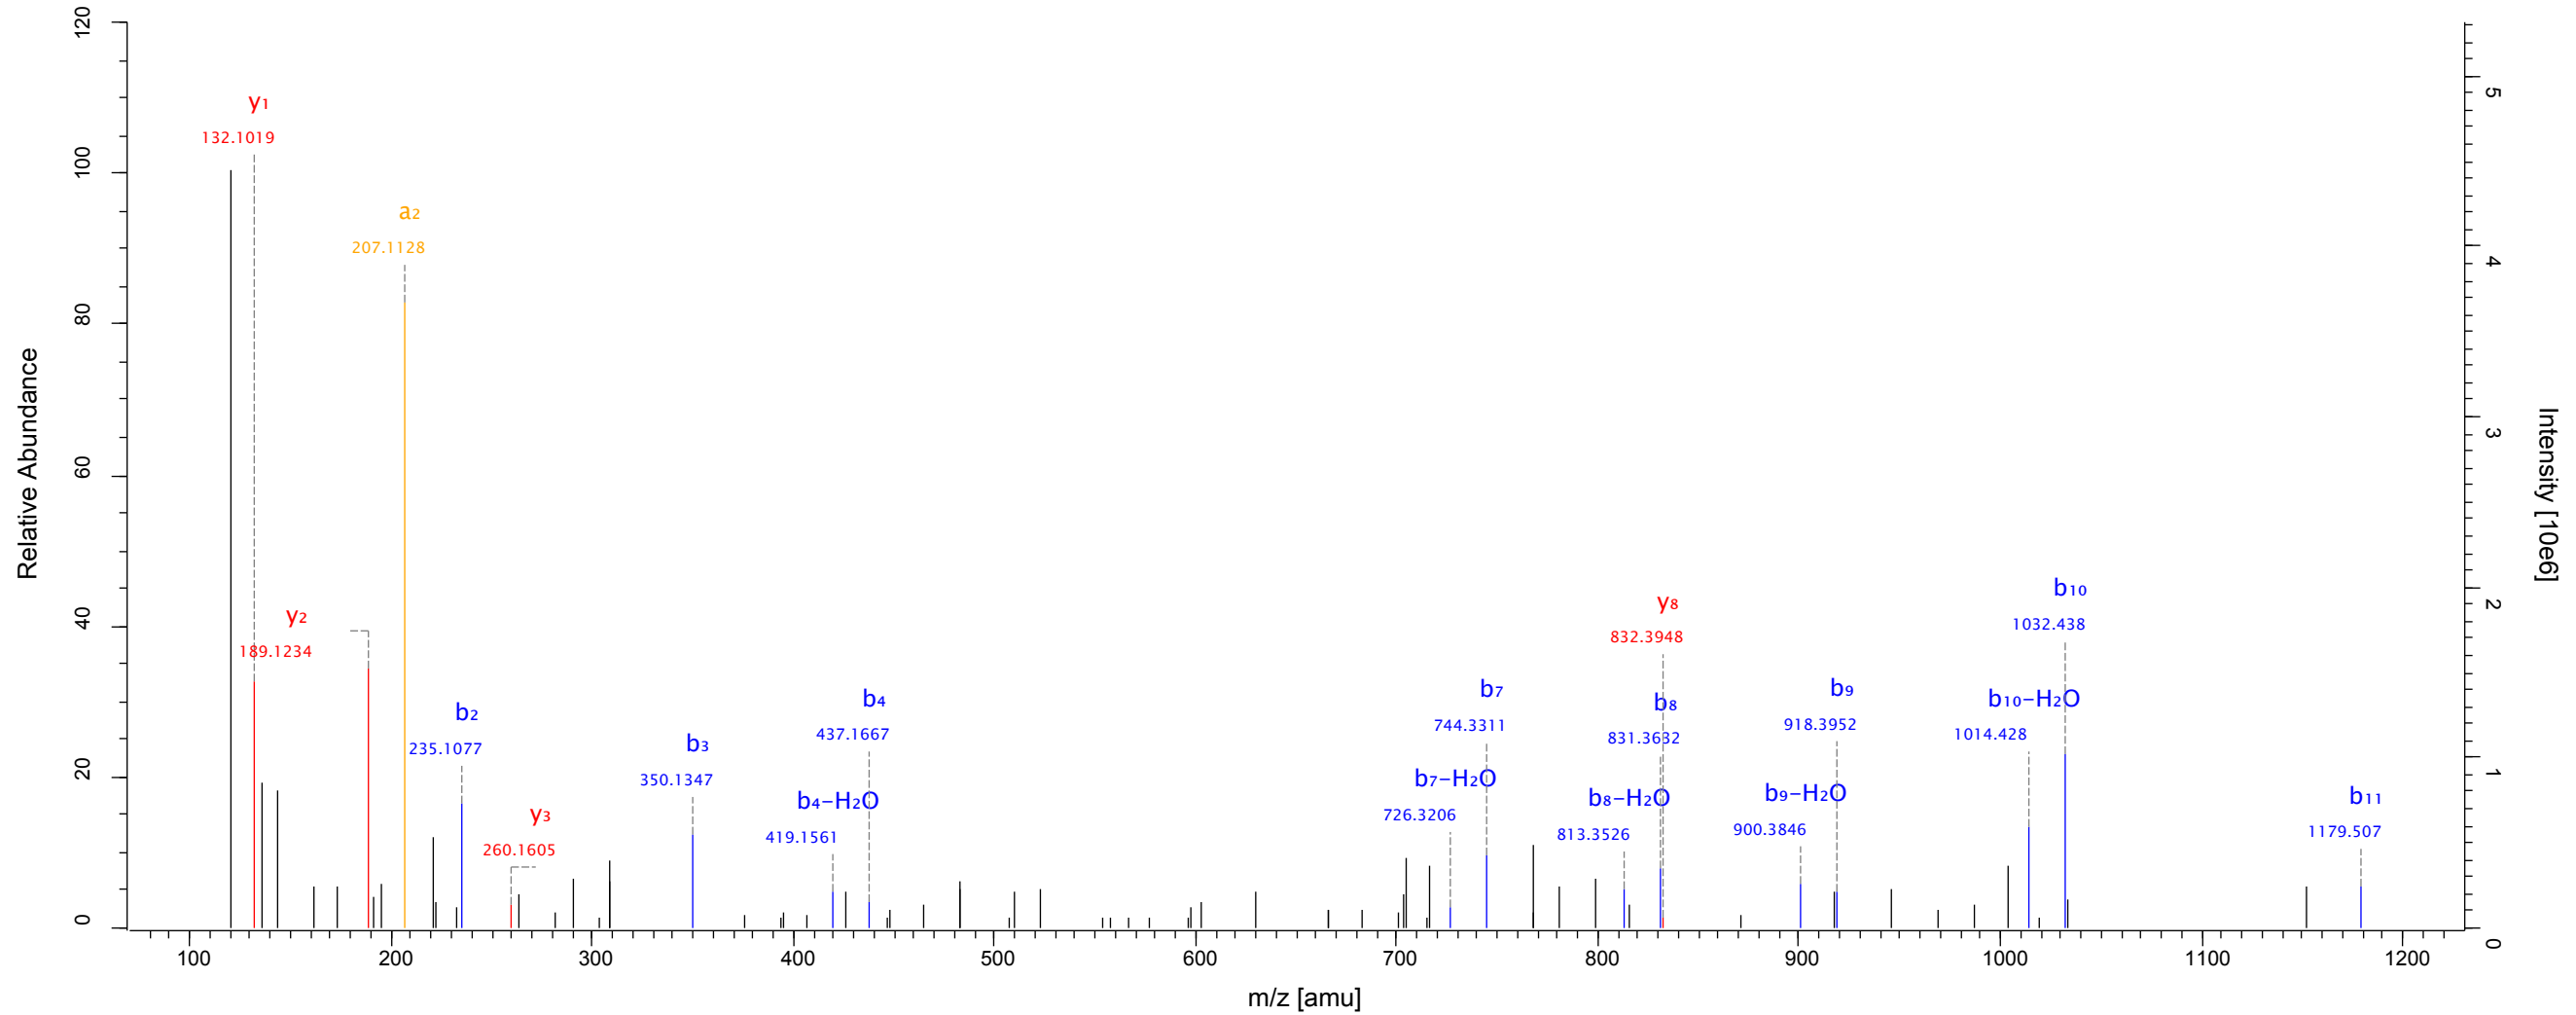

# peptide ID 44

Source: 20121106\_CO\_0340Gaje\_R02\_2  
Scannumber: 12920  
Protein: pep\_209; pep\_secretome\_10080; pep\_secretome\_10079; pep\_secretome\_63156; pep\_secretome\_63157  
Peptide Score: 97.21  
Method: FTMS; HCD; 1

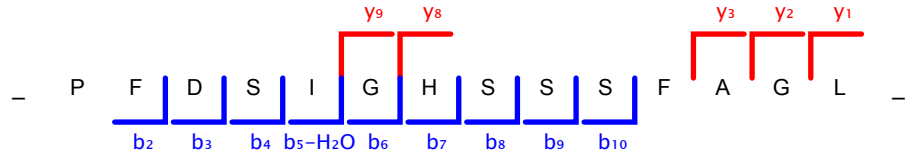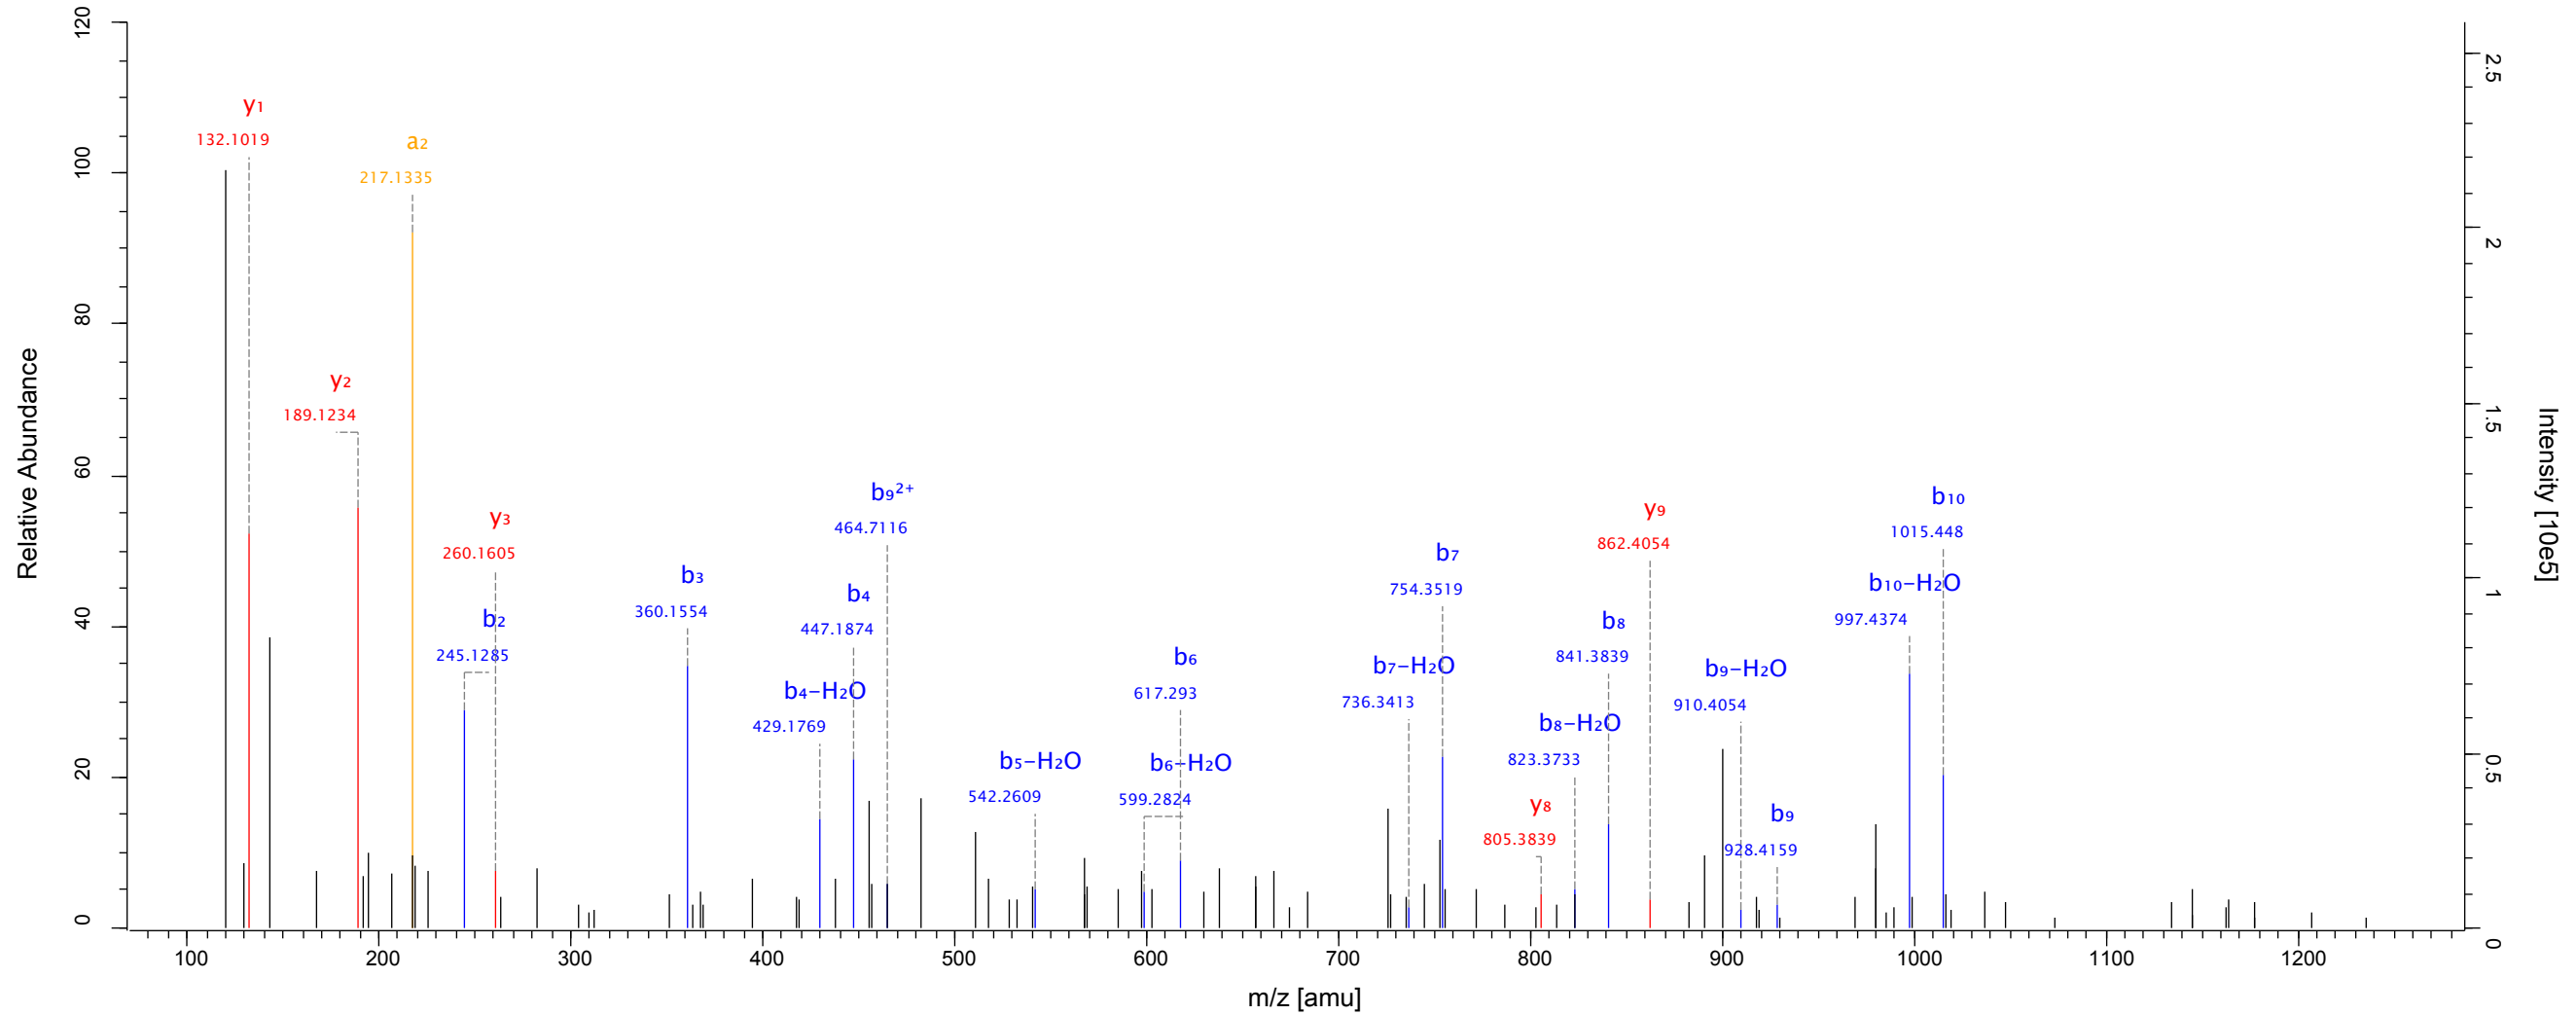



# peptide ID 45

Source: 20120816\_CO\_0340Gaje\_R02  
Scannumber: 13787  
Protein: pep\_210; pep\_secretome\_10081; pep\_secretome\_63158  
Peptide Score: 147.91  
Method: FTMS; HCD; 1

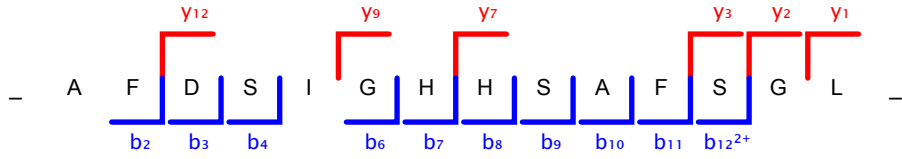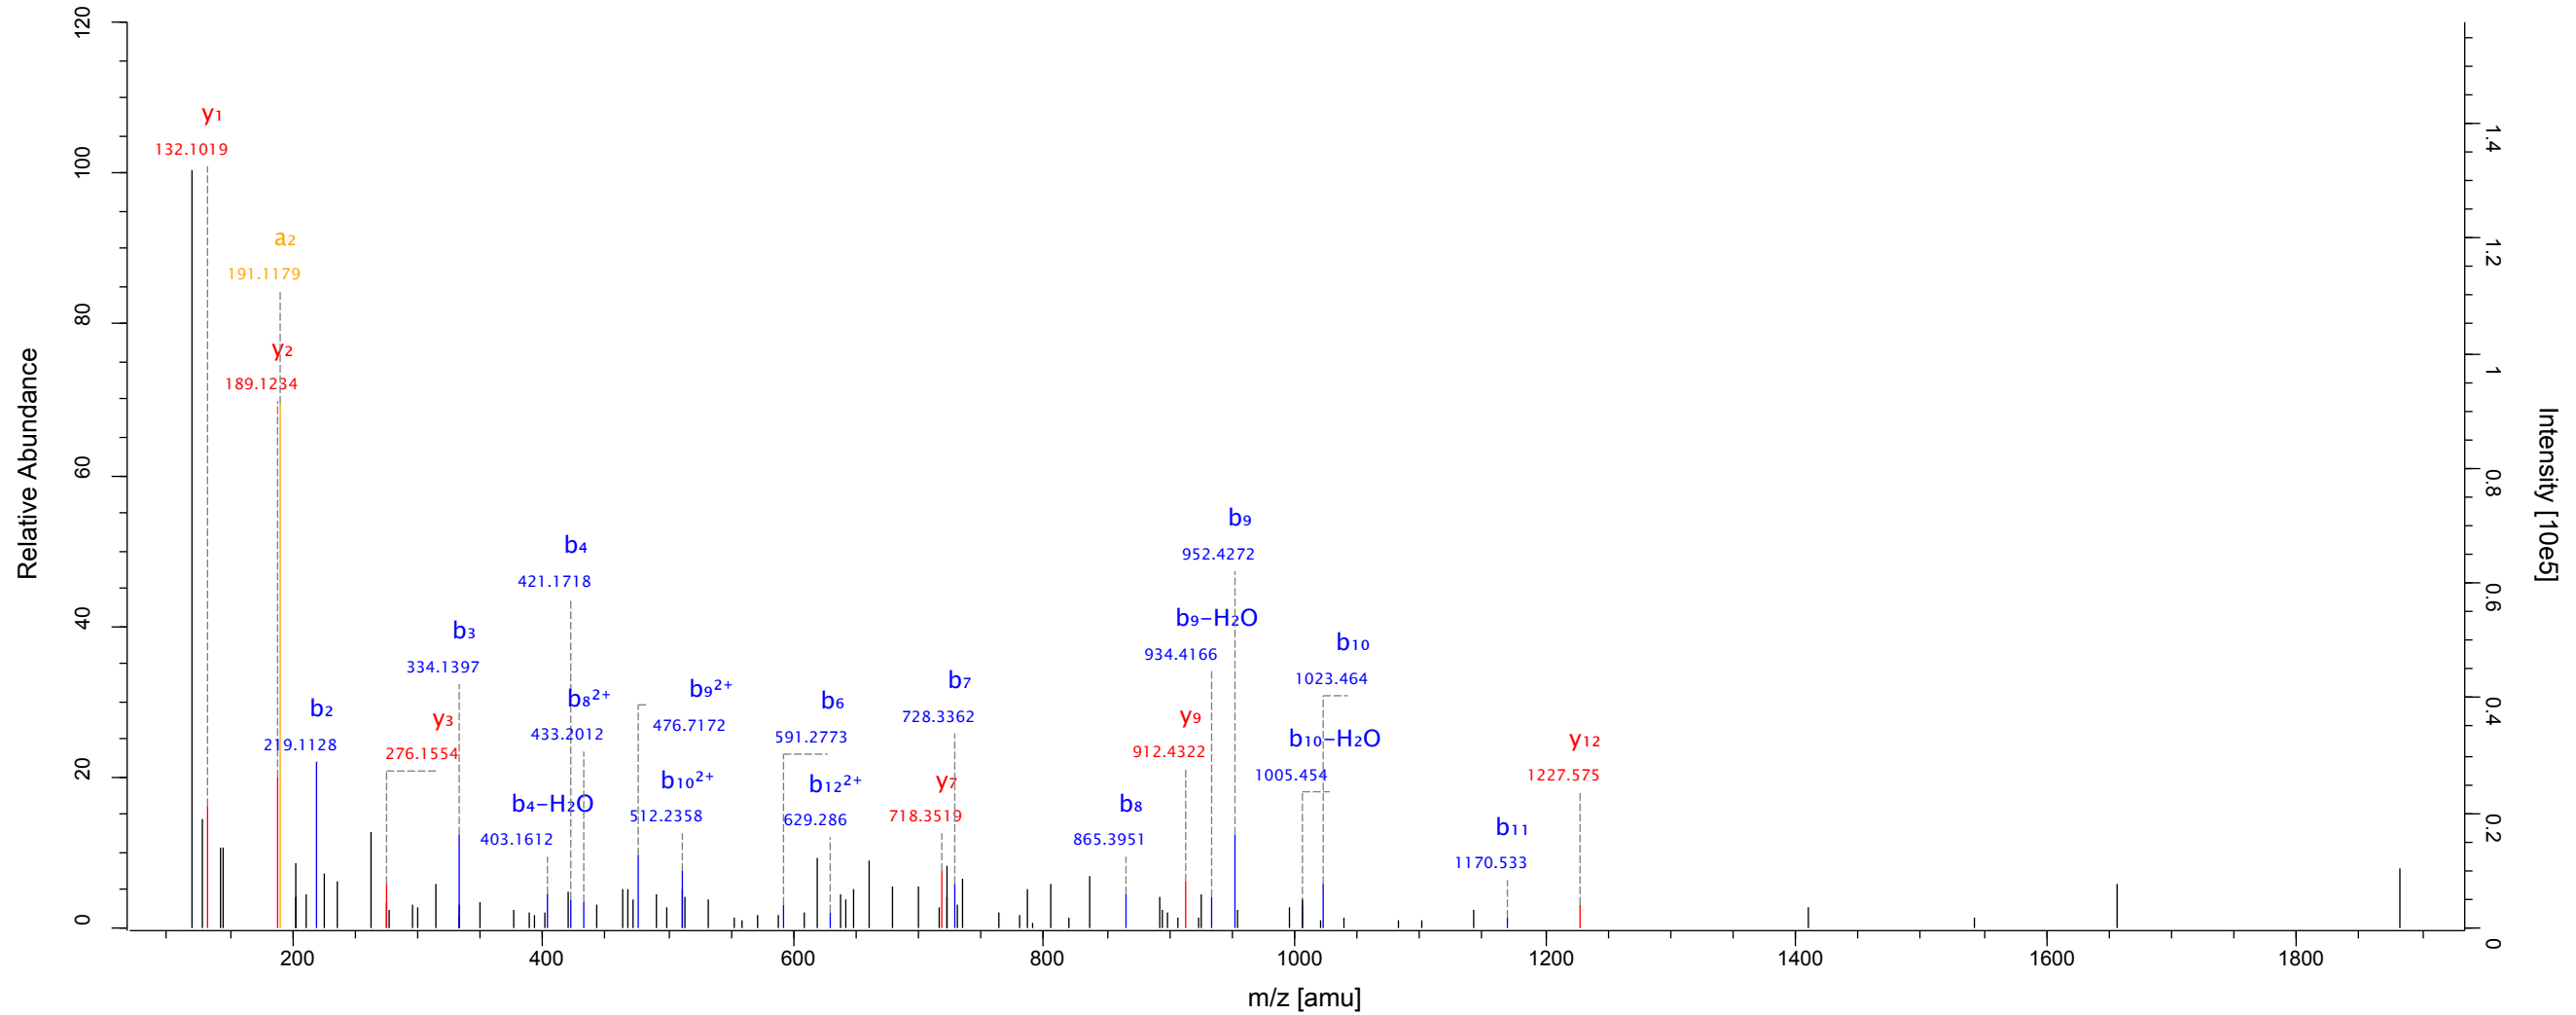

# peptide ID 46

Source: 20120816\_CO\_0340Gaje\_R02

Scannumber: 12369

Protein: pep\_212; pep\_secretome\_10091; pep\_secretome\_10094; pep\_secretome\_10095; pep\_secretome\_10096; pep\_secretome\_10097; pep\_secretome\_10098; pep\_secretome\_63168; pep\_secretome\_63171; pep\_secretome\_63172; pep\_secretome\_63173; pep\_secretome\_63174

Peptide Score: 104.7

Method: FTMS; HCD; 1

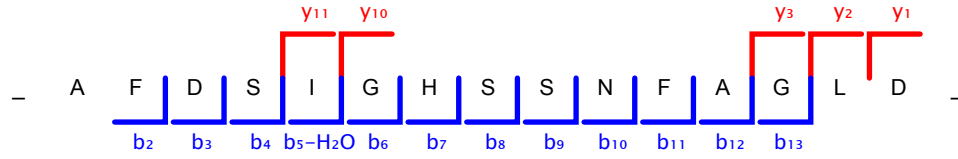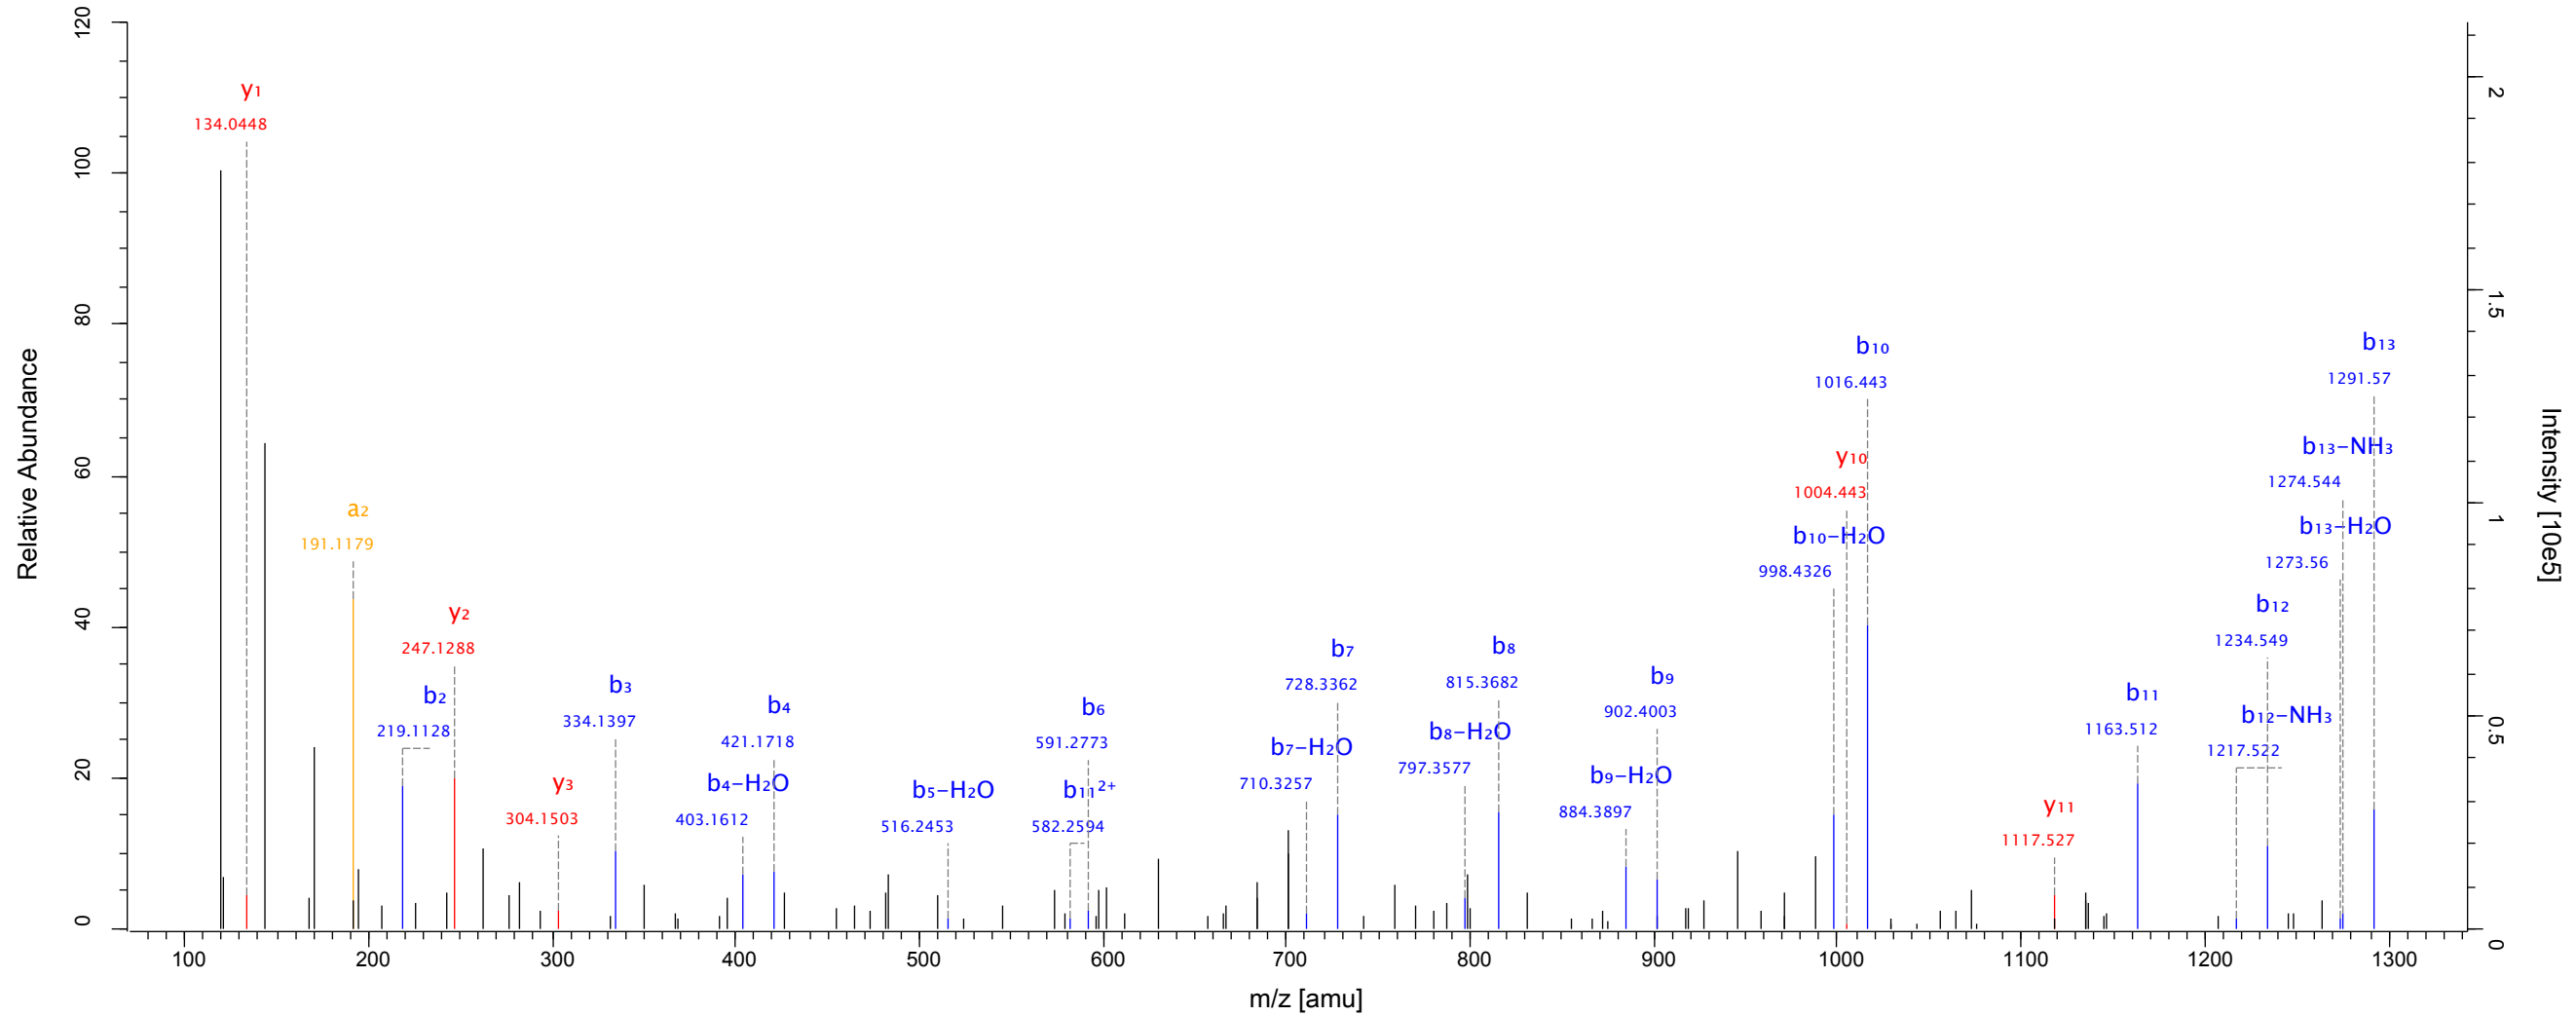

# peptide ID 47

Source: 20120816\_CO\_0340Gaje\_R02  
Scannumber: 13077  
Protein: pep\_214  
Peptide Score: 100.19  
Method: FTMS; HCD; 1

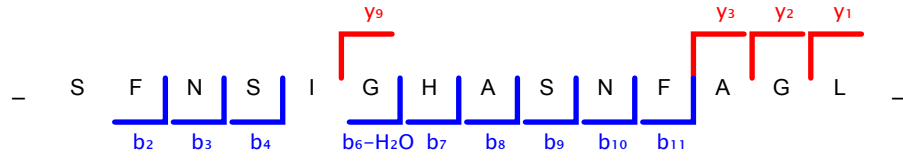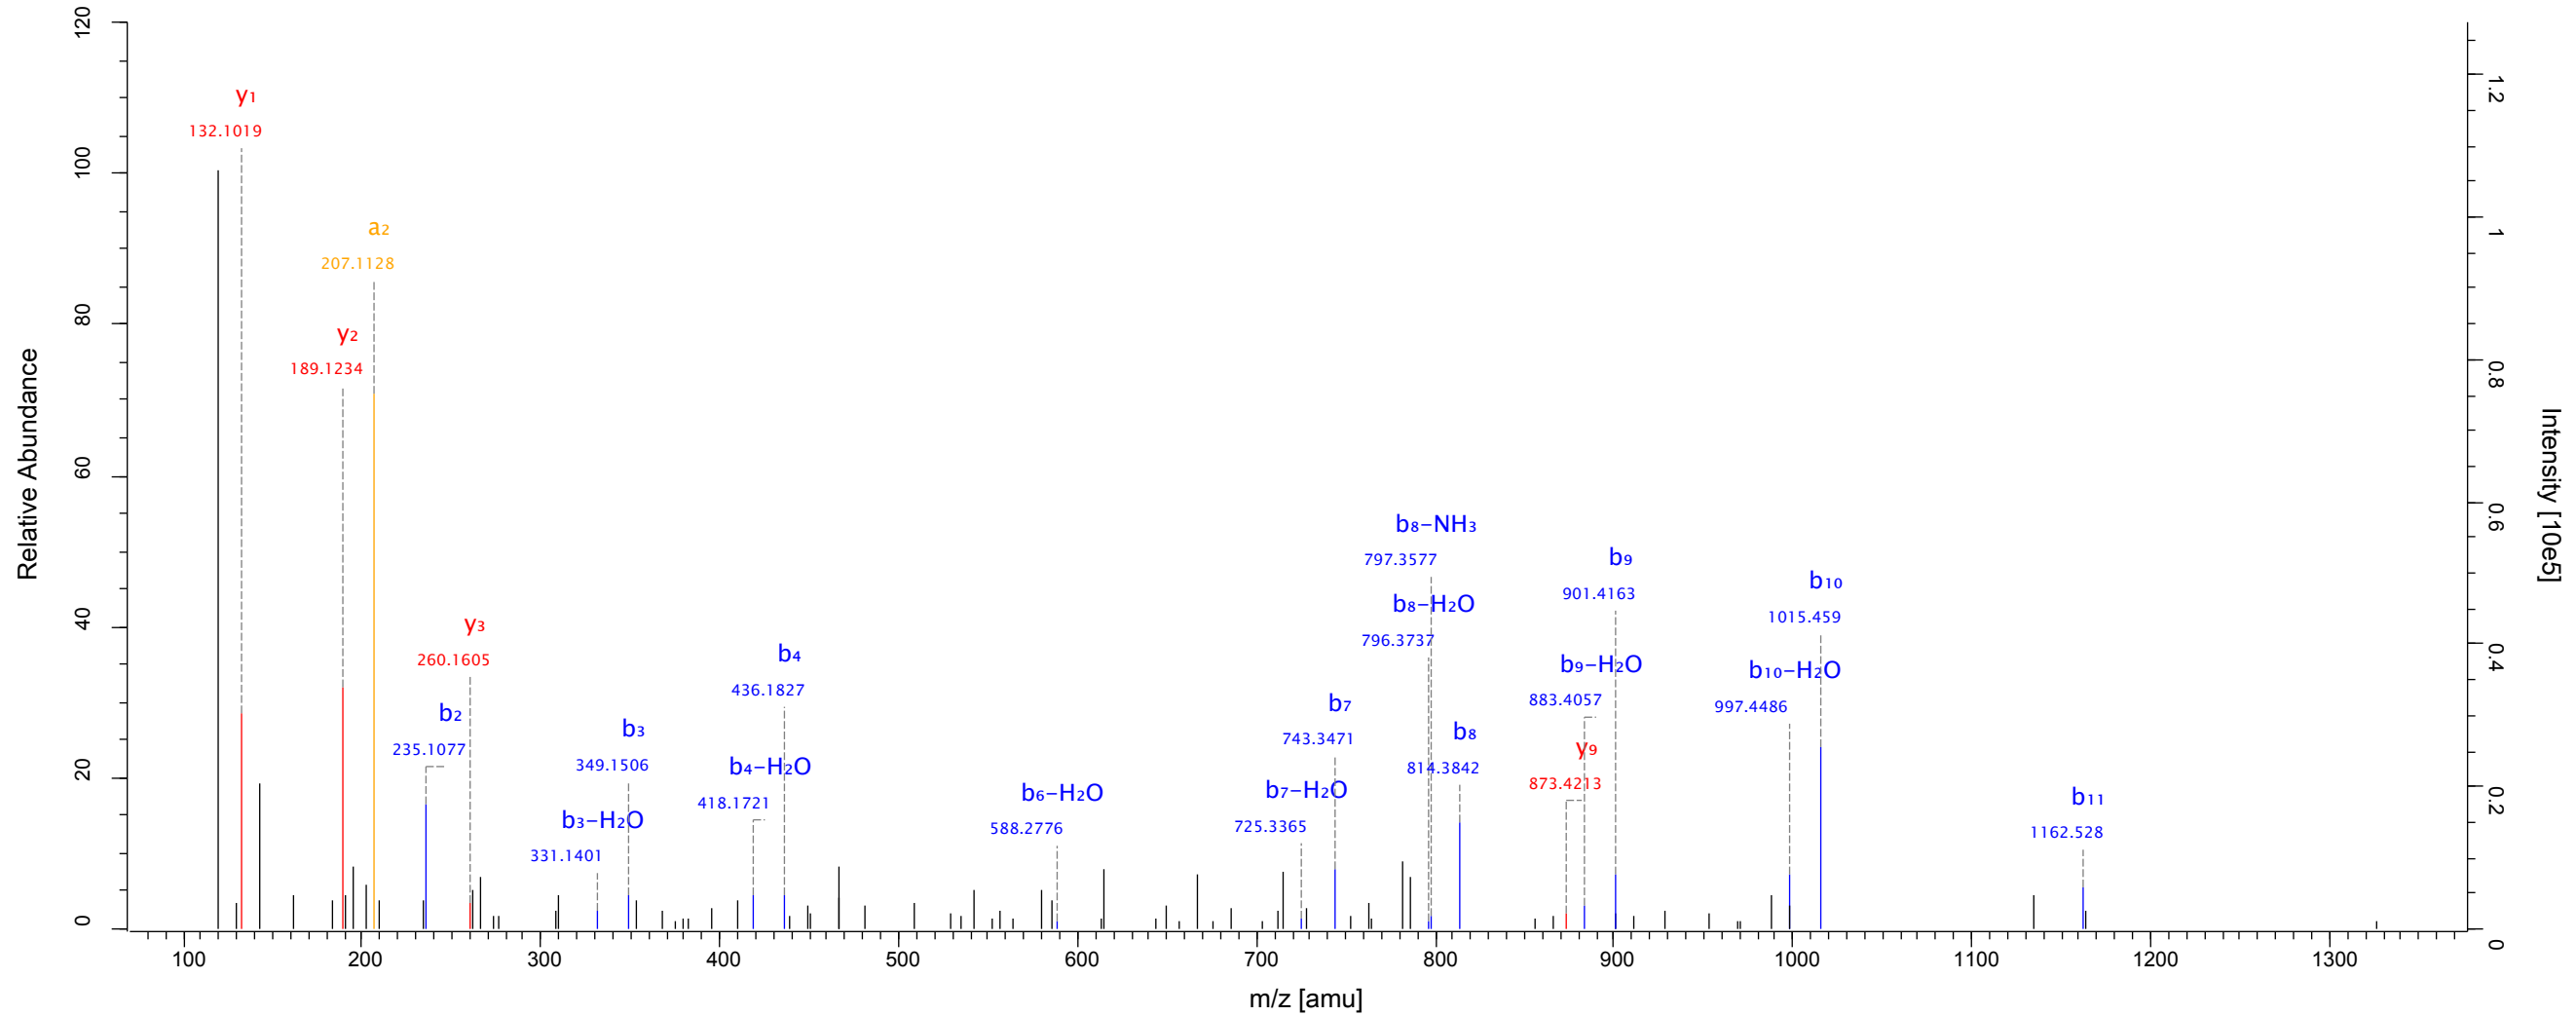

# peptide ID 48

Source: 20120816\_CO\_0340Gaje\_R02  
Scannumber: 7364  
Protein: pep\_62; pep\_secretome\_113  
Peptide Score: 64.94  
Method: FTMS; HCD; 1

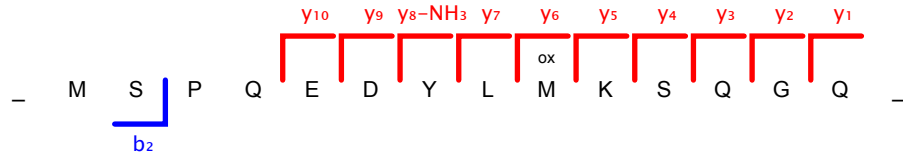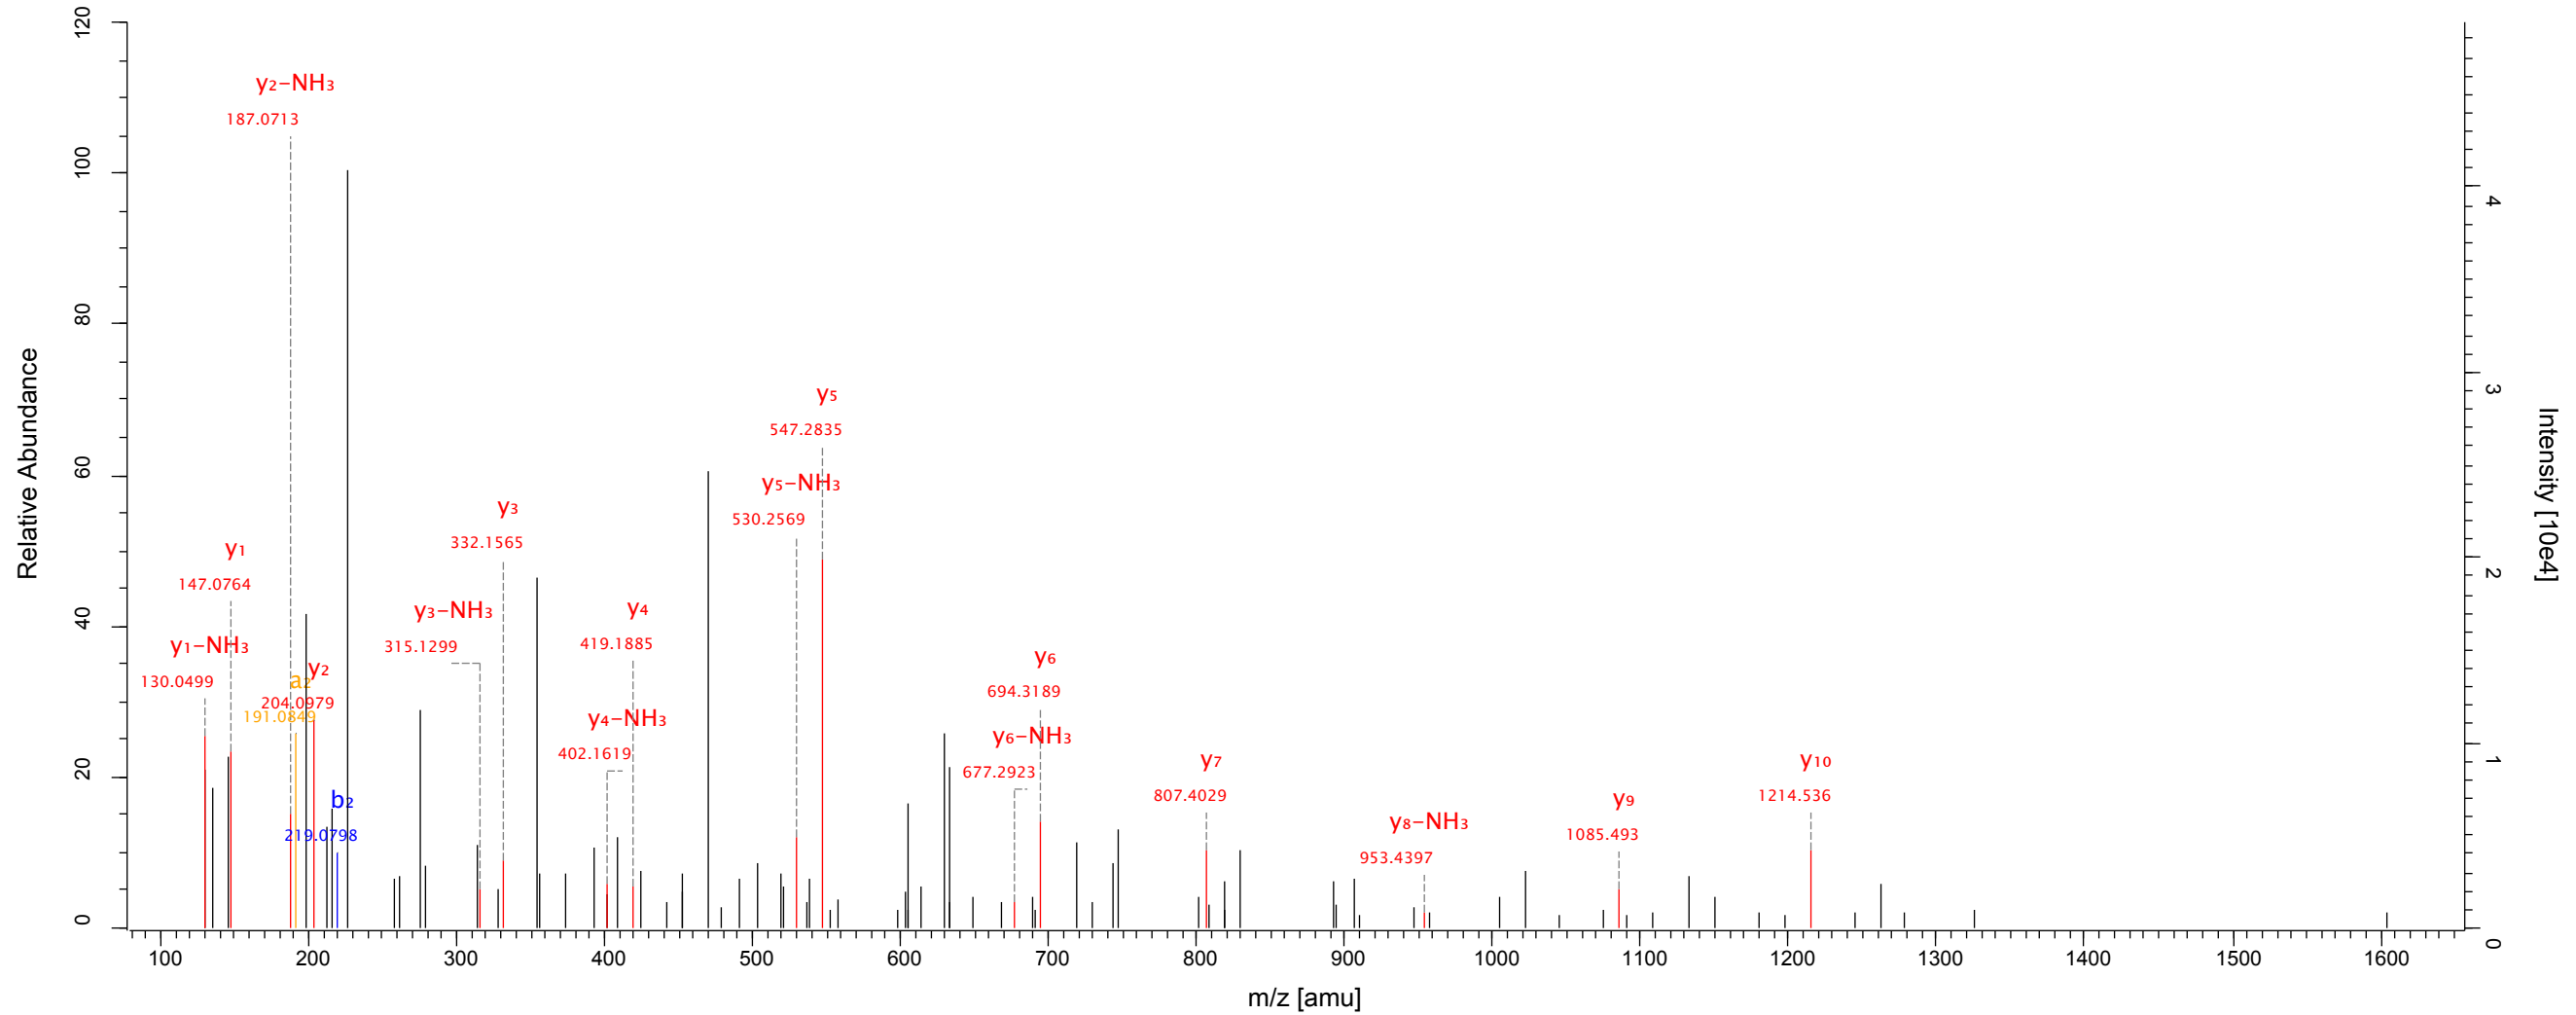

# peptide ID 49

Source: 20121106\_CO\_0340Gaje\_R02\_2  
Scannumber: 6387  
Protein: pep\_62; pep\_secretome\_113  
Peptide Score: 93.77  
Method: FTMS; HCD; 1

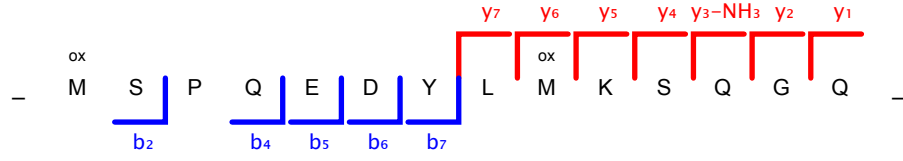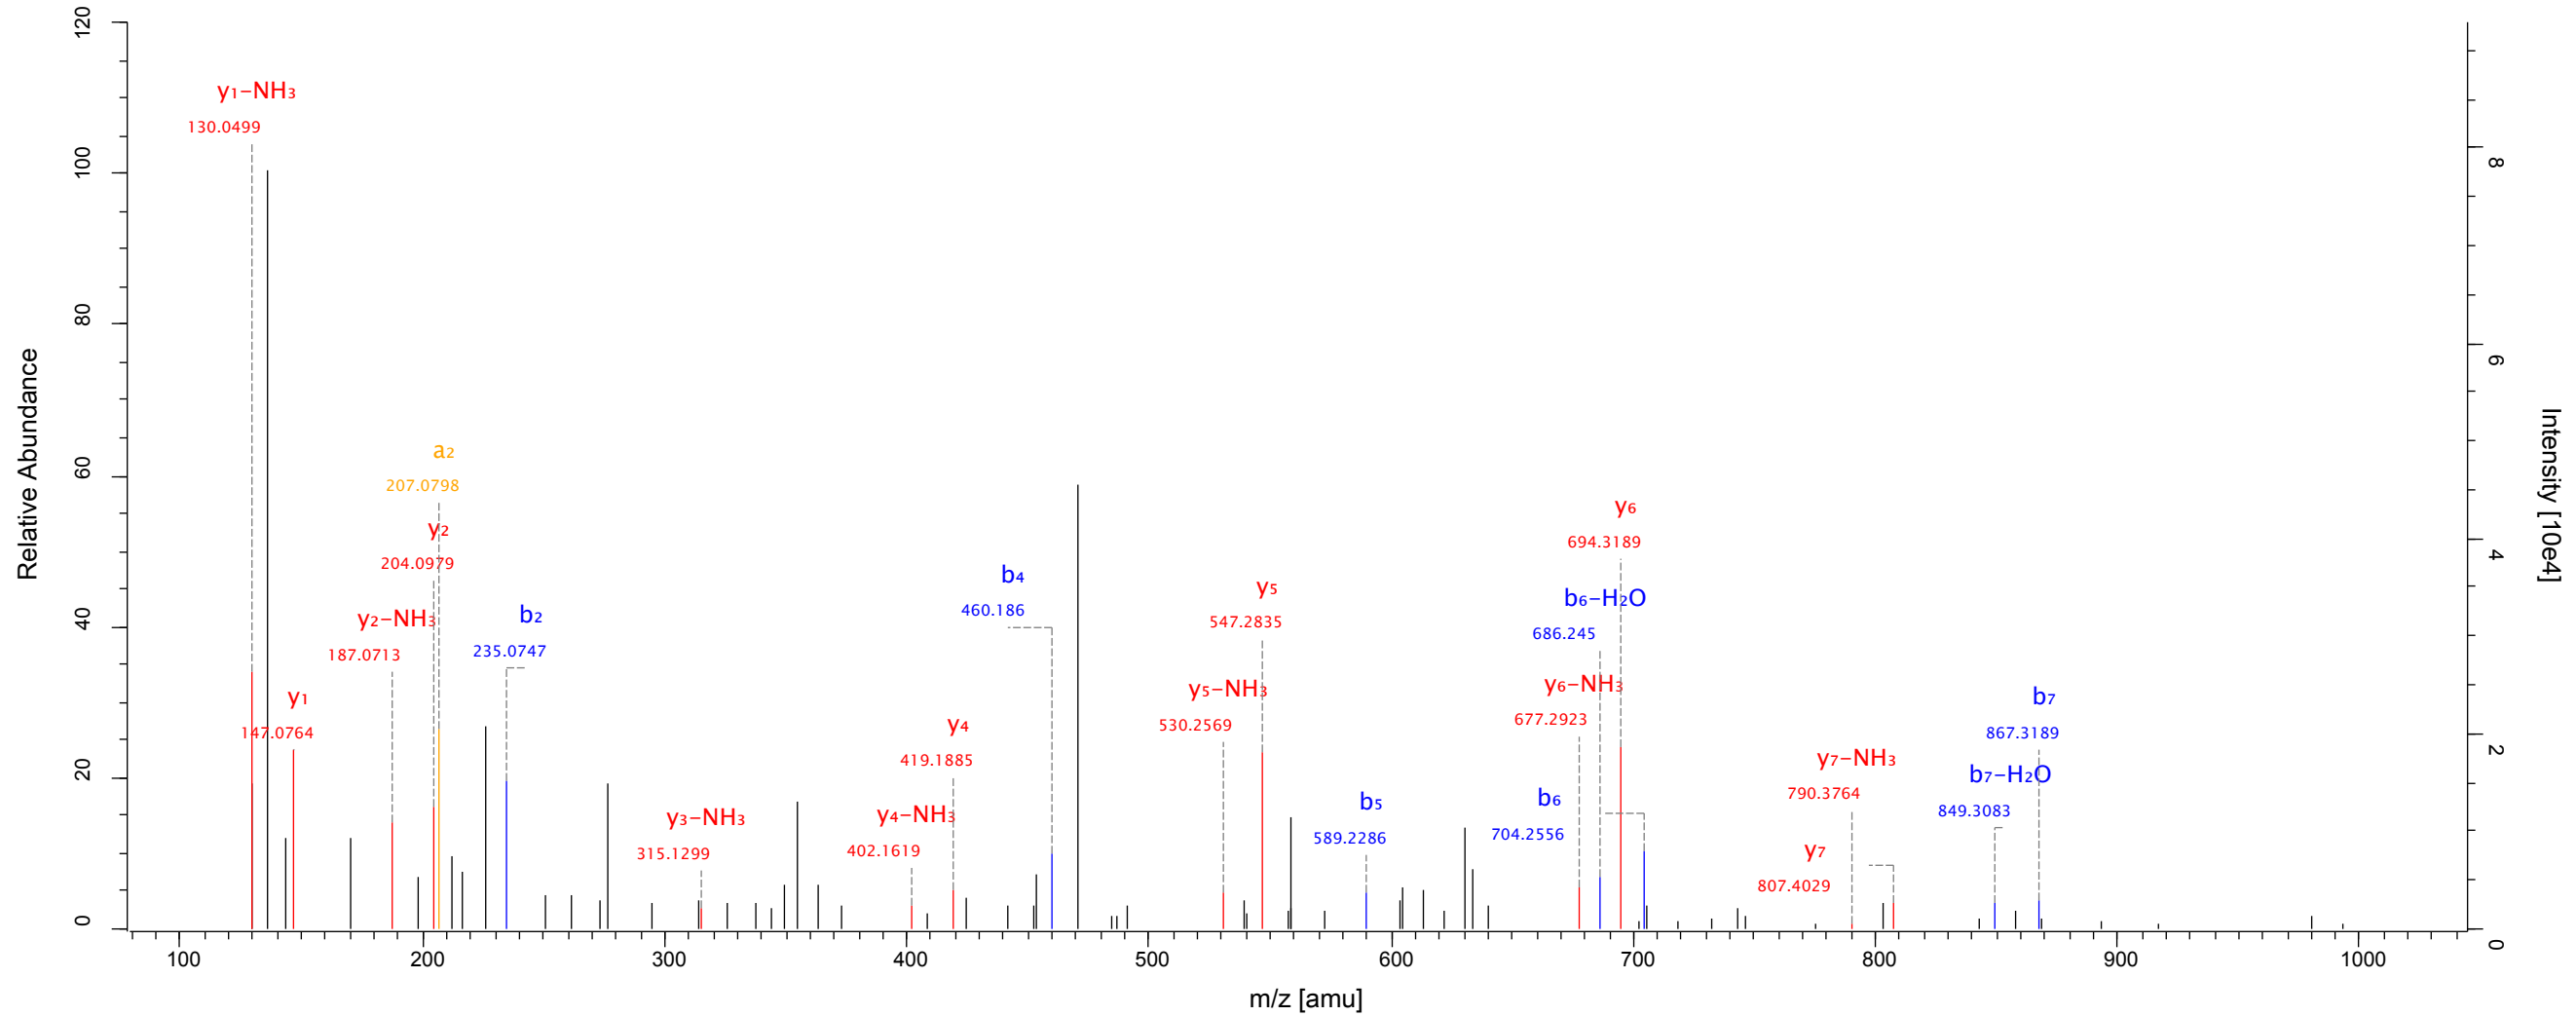

# peptide ID 50

Source: 20120515\_CO\_0340Gaje\_R01

Scannumber: 17484

Protein: pep\_63; pep\_secretome\_115; pep\_secretome\_116; pep\_secretome\_117; pep\_secretome\_118; pep\_secretome\_120; pep\_secretome\_114; pep\_secretome\_22758; pep\_secretome\_22759; pep\_secretome\_22760; pep\_secretome\_22761; pep\_secretome\_22762;

Peptide Score: 178.84

Method: FTMS; HCD; 1

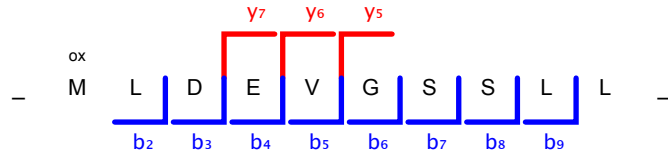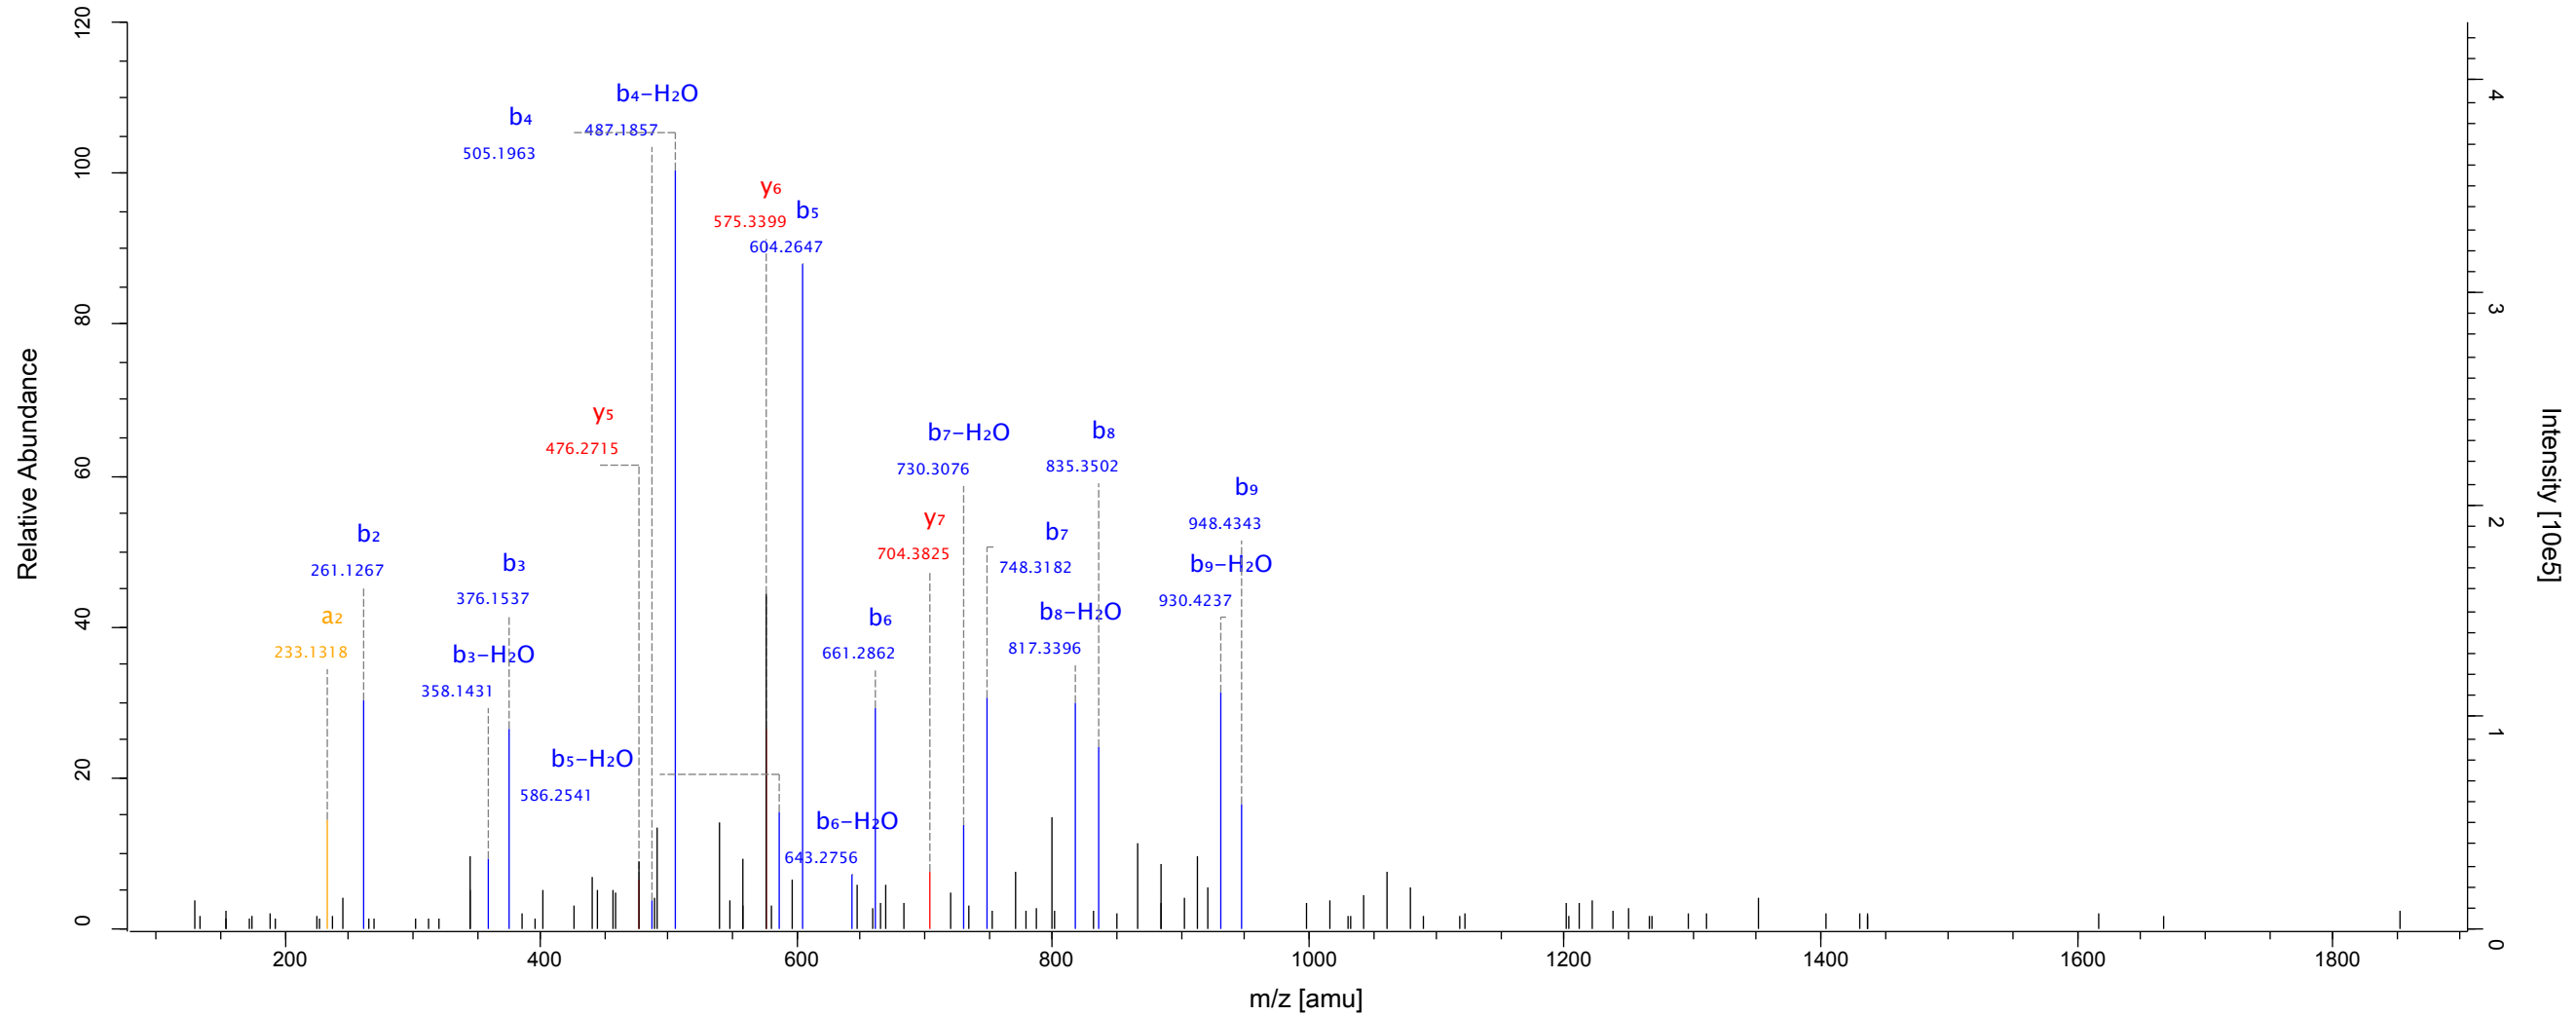

# peptide ID 51

Source: 20120816\_CO\_0340Gaje\_R02  
Scannumber: 13703  
Protein: pep\_64; pep\_secretome\_121  
Peptide Score: 134.15  
Method: FTMS; HCD; 1

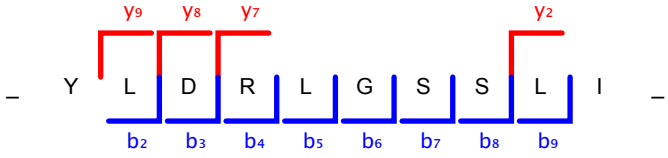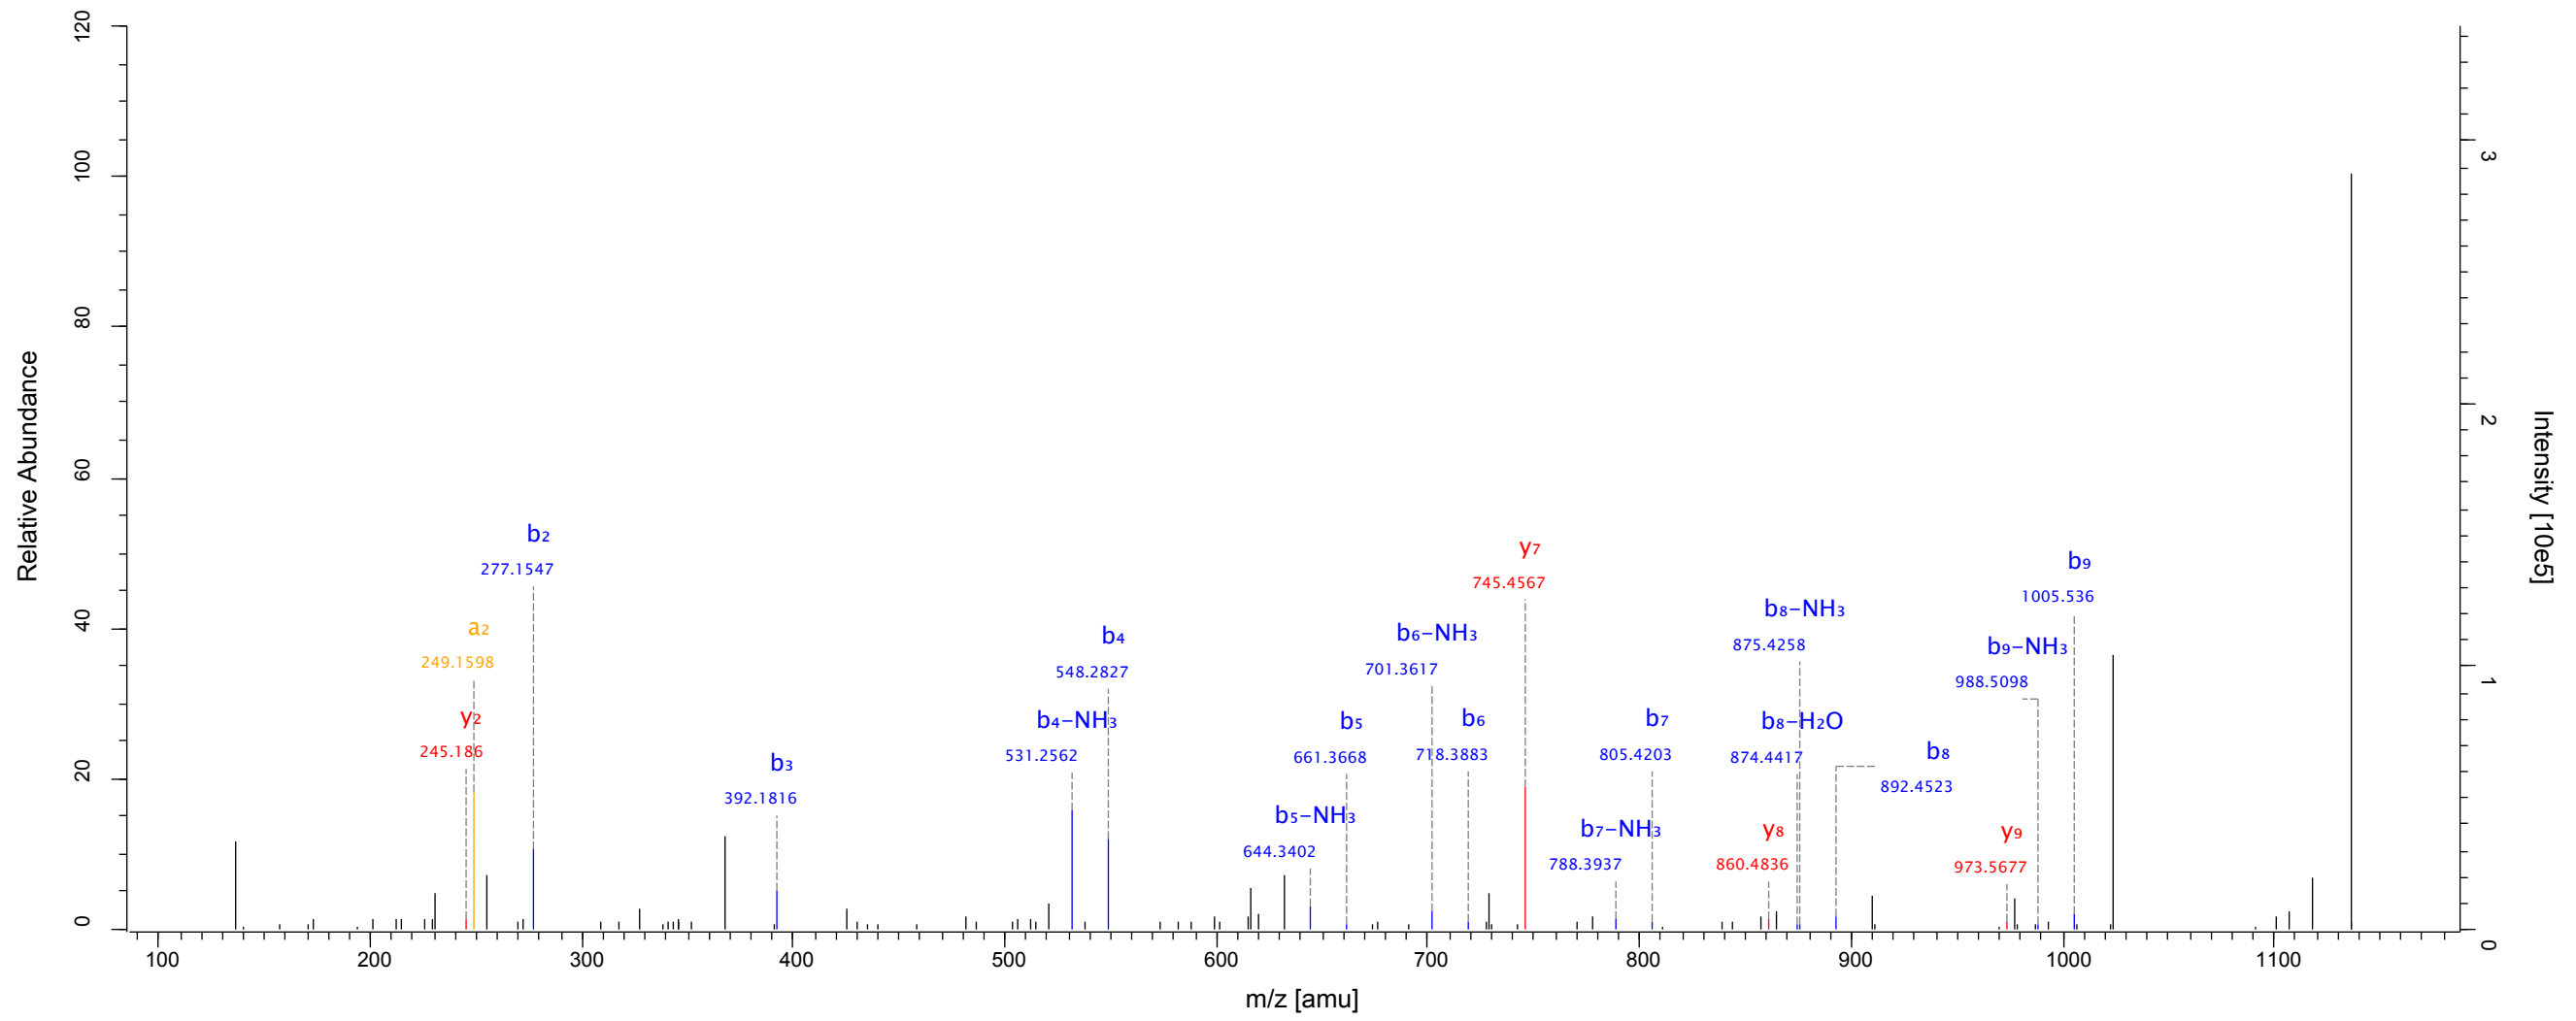

# peptide ID 52

Source: 20120816\_CO\_0340Gaje\_R02  
Scannumber: 8454  
Protein: orf\_3472; orf\_7284  
Peptide Score: 95.77  
Method: FTMS; HCD; 1

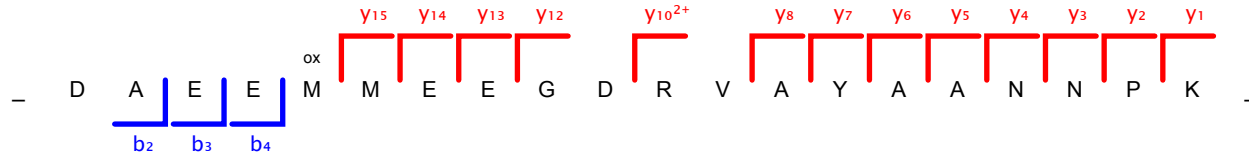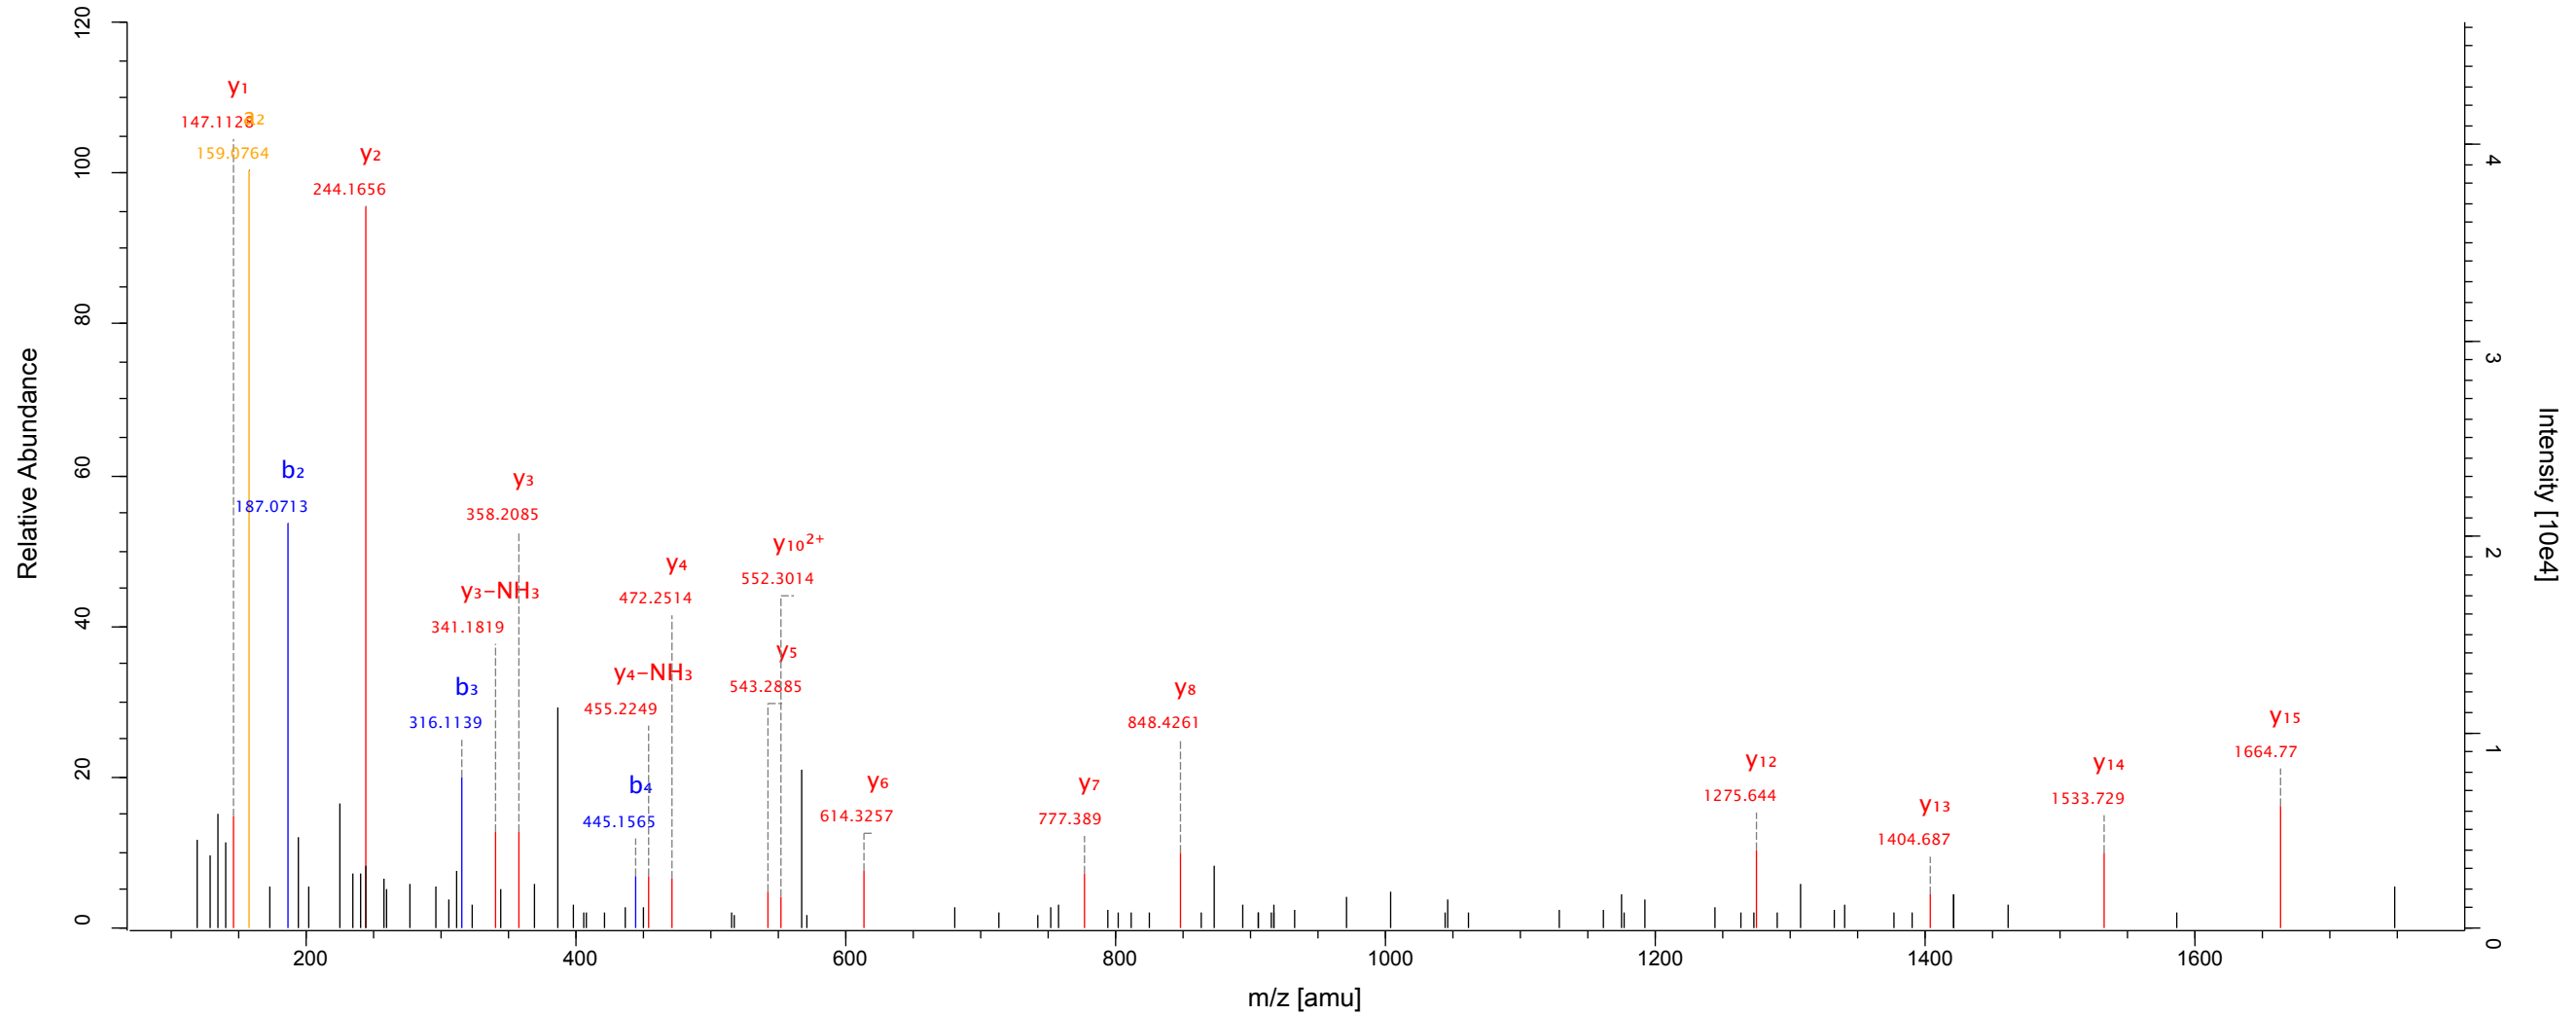



# peptide ID 53

Source: 20120816\_CO\_0340Gaje\_R02  
Scannumber: 6595  
Protein: orf\_3472; orf\_7284  
Peptide Score: 74.12  
Method: FTMS; HCD; 1

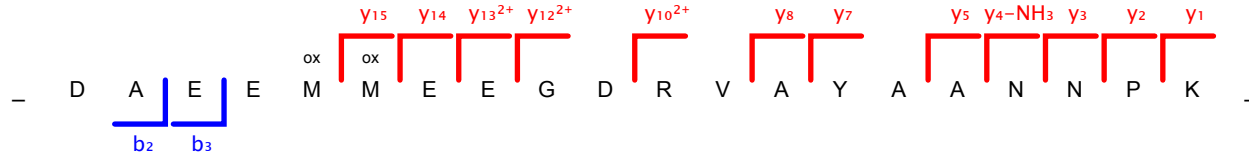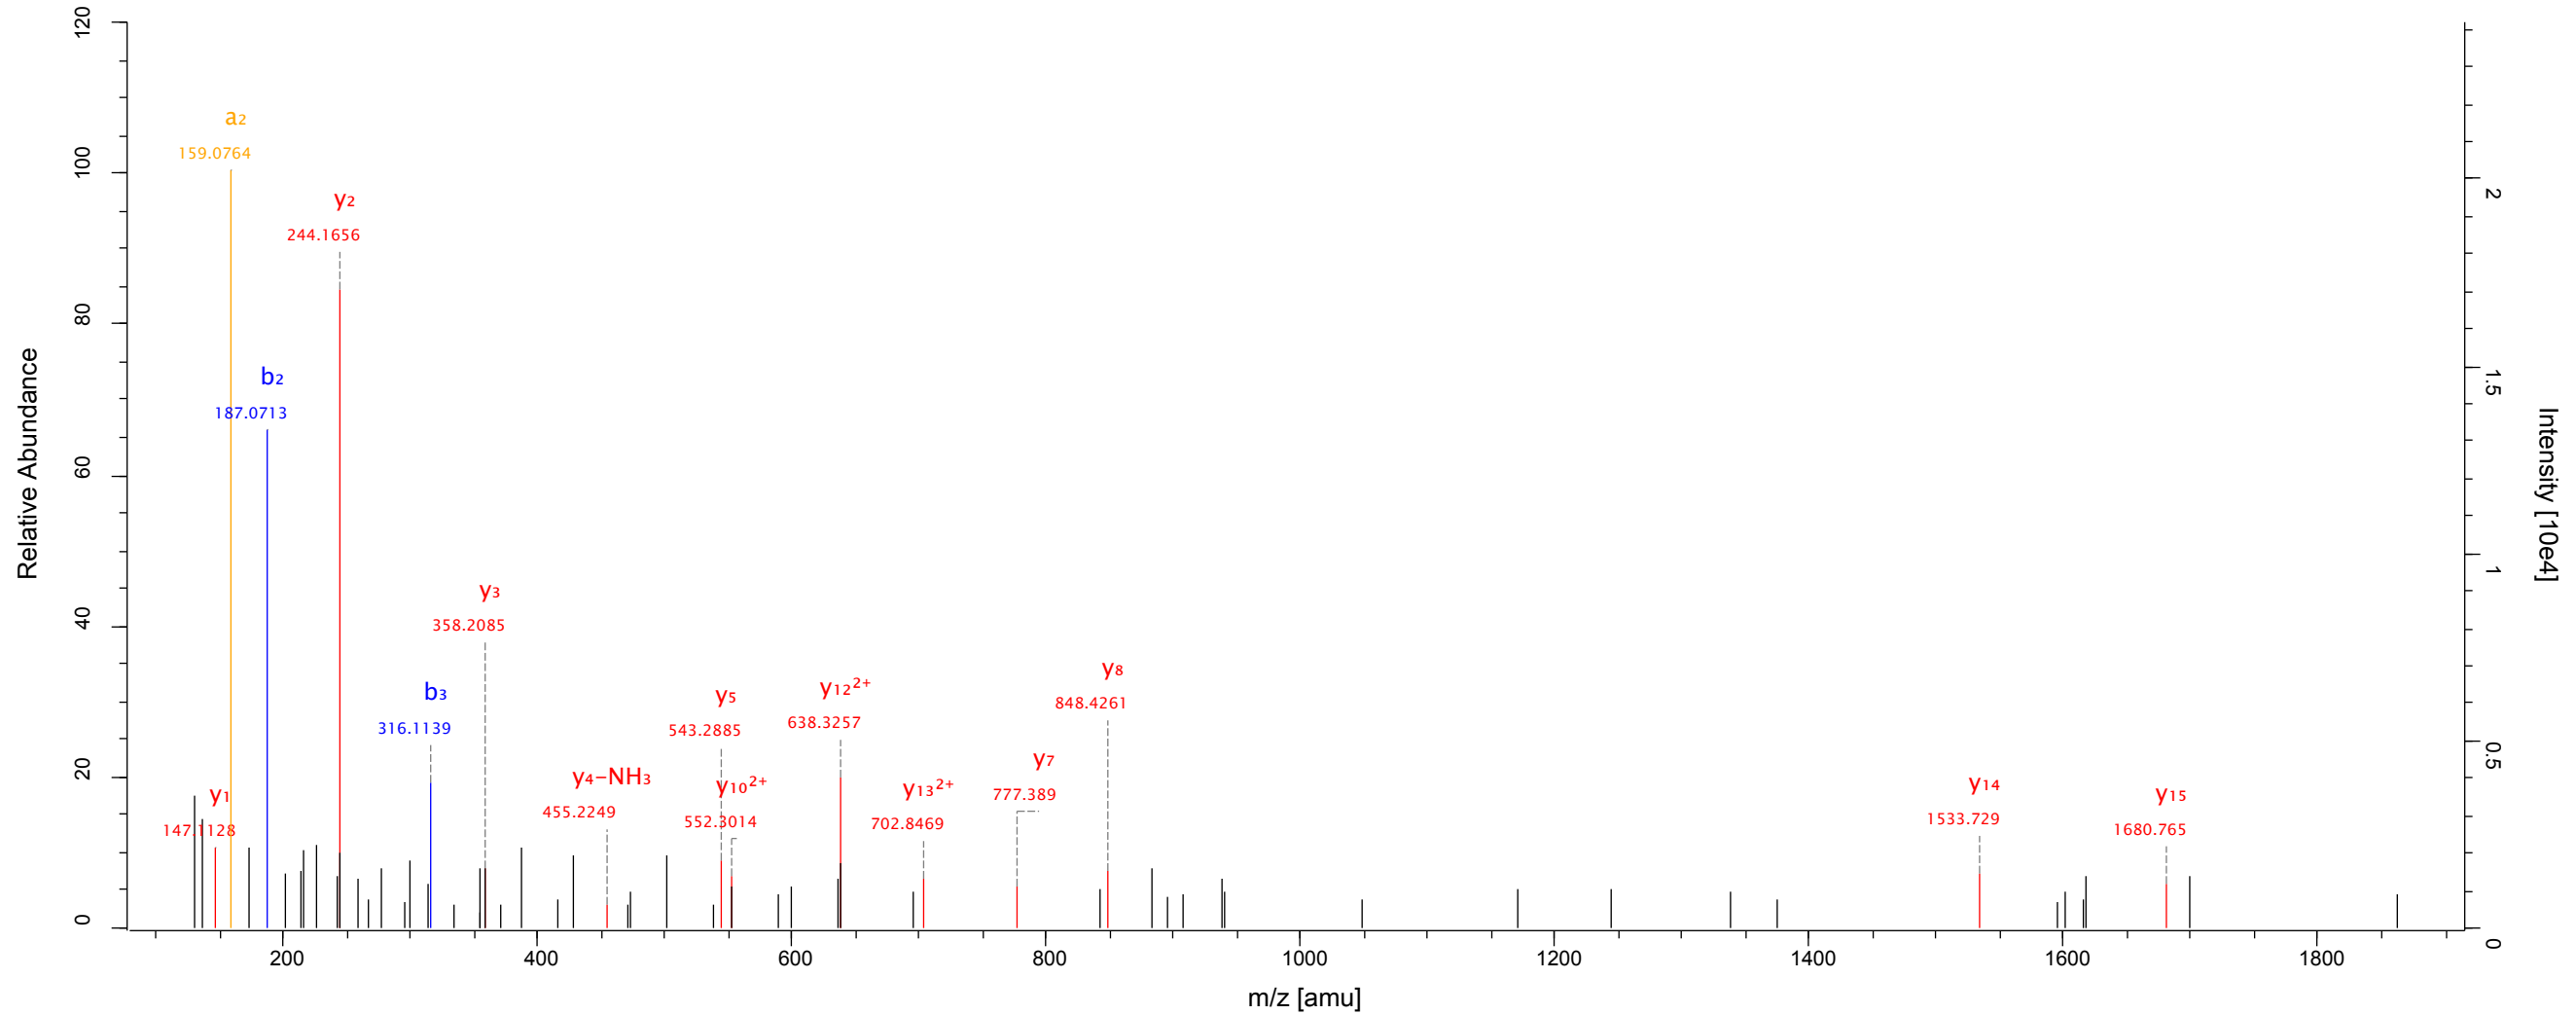

# peptide ID 54

Source: 20120816\_CO\_0340Gaje\_R02  
Scannumber: 7087  
Protein: pep\_secretome\_57816; pep\_secretome\_9016  
Peptide Score: 64.8  
Method: FTMS; HCD; 1

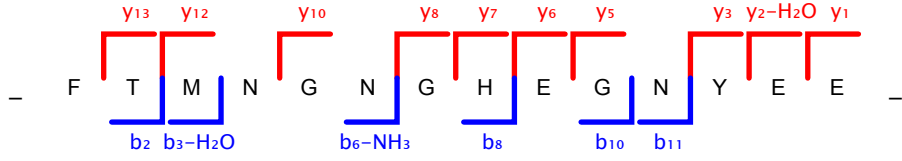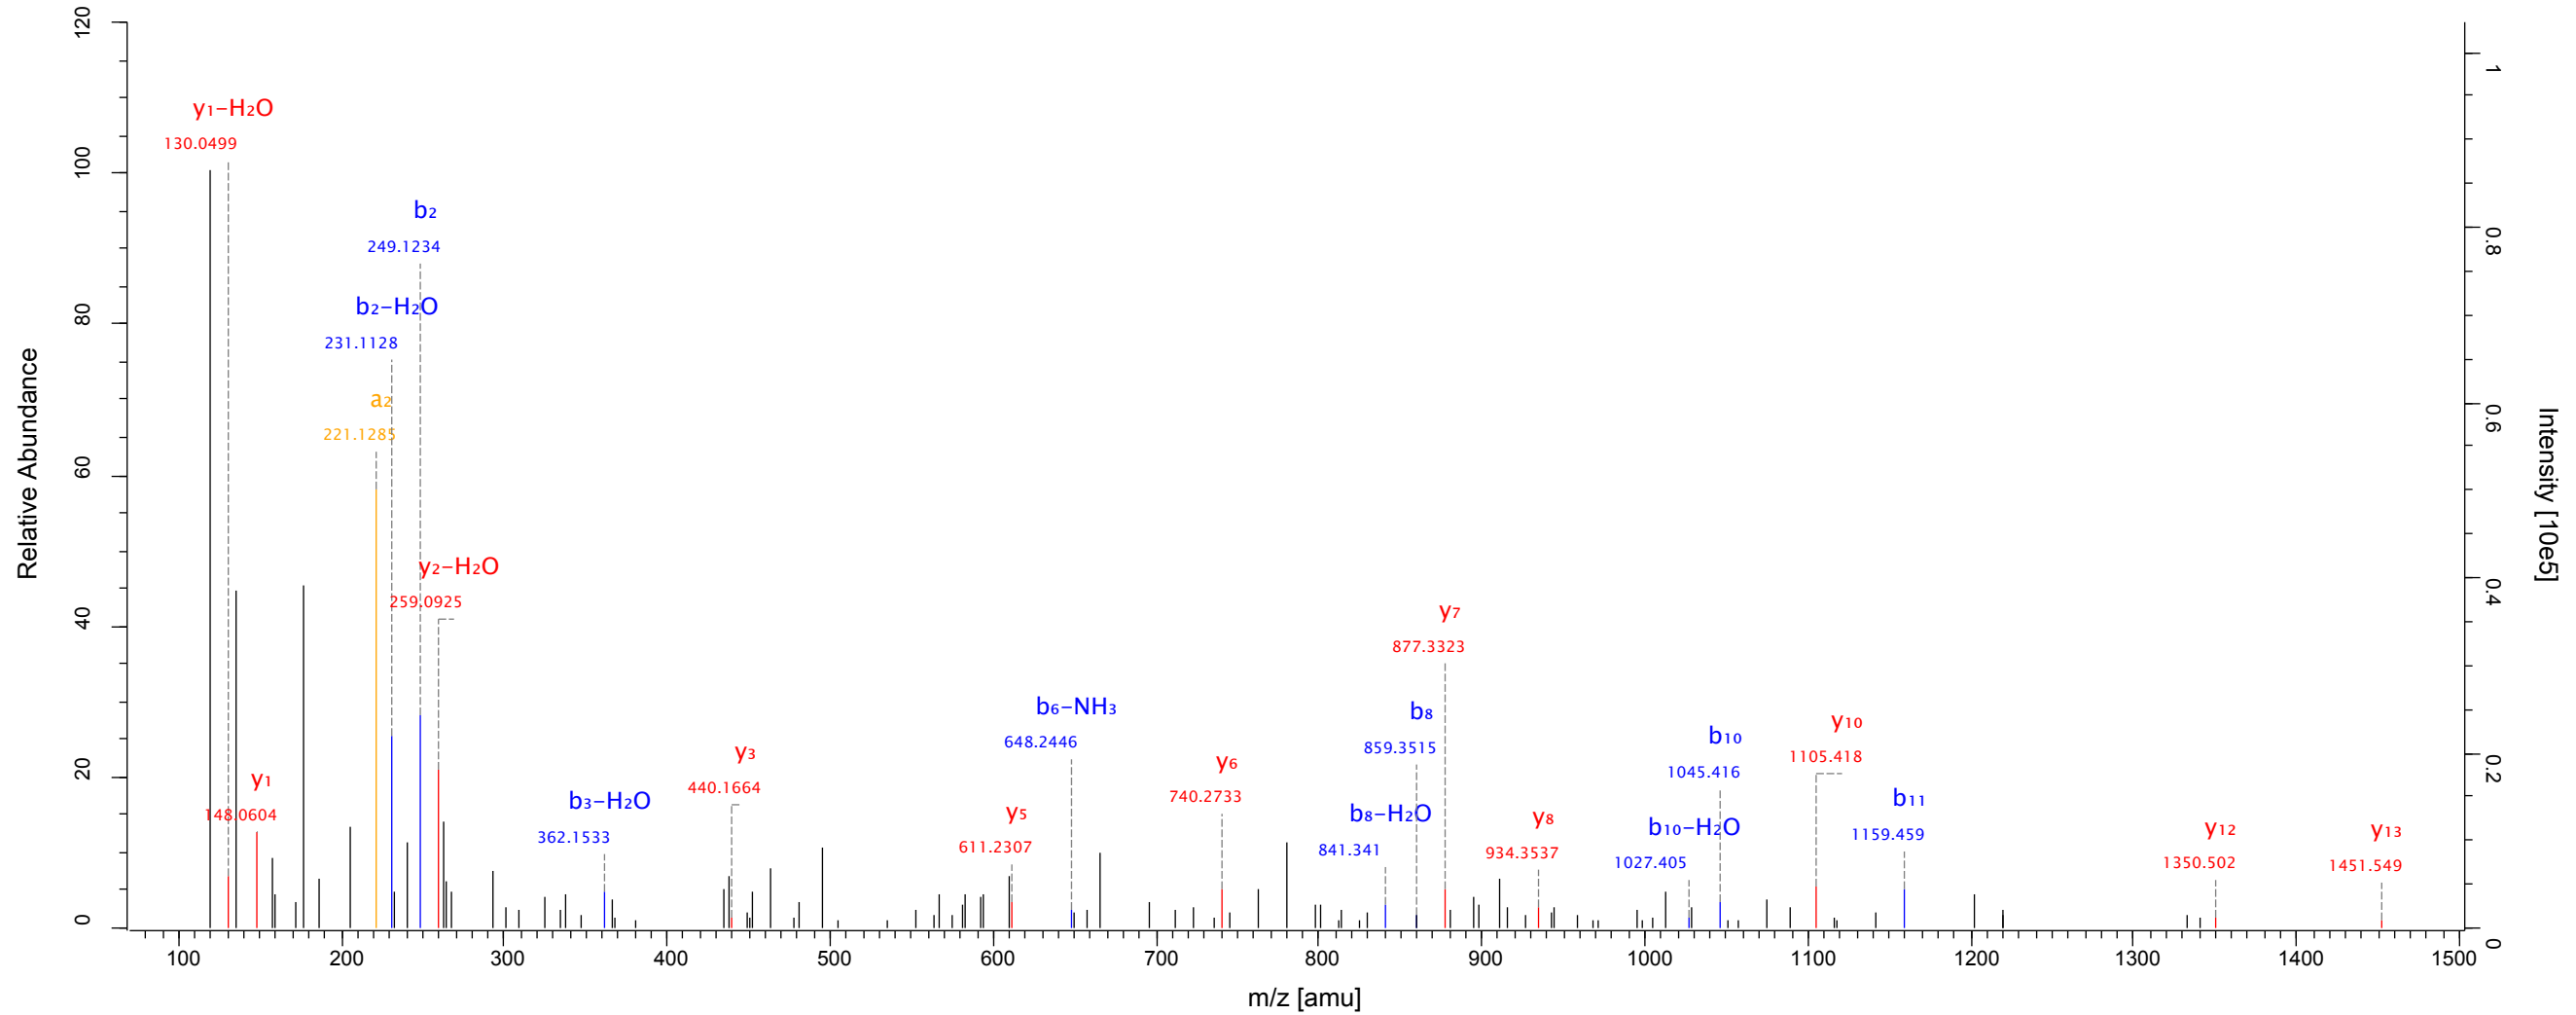

# peptide ID 55

Source: 20120816\_CO\_0340Gaje\_R02  
Scannumber: 13663  
Protein: SinglePep86  
Peptide Score: 134.44  
Method: FTMS; HCD; 1

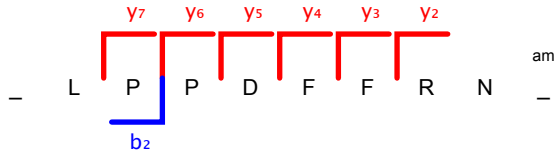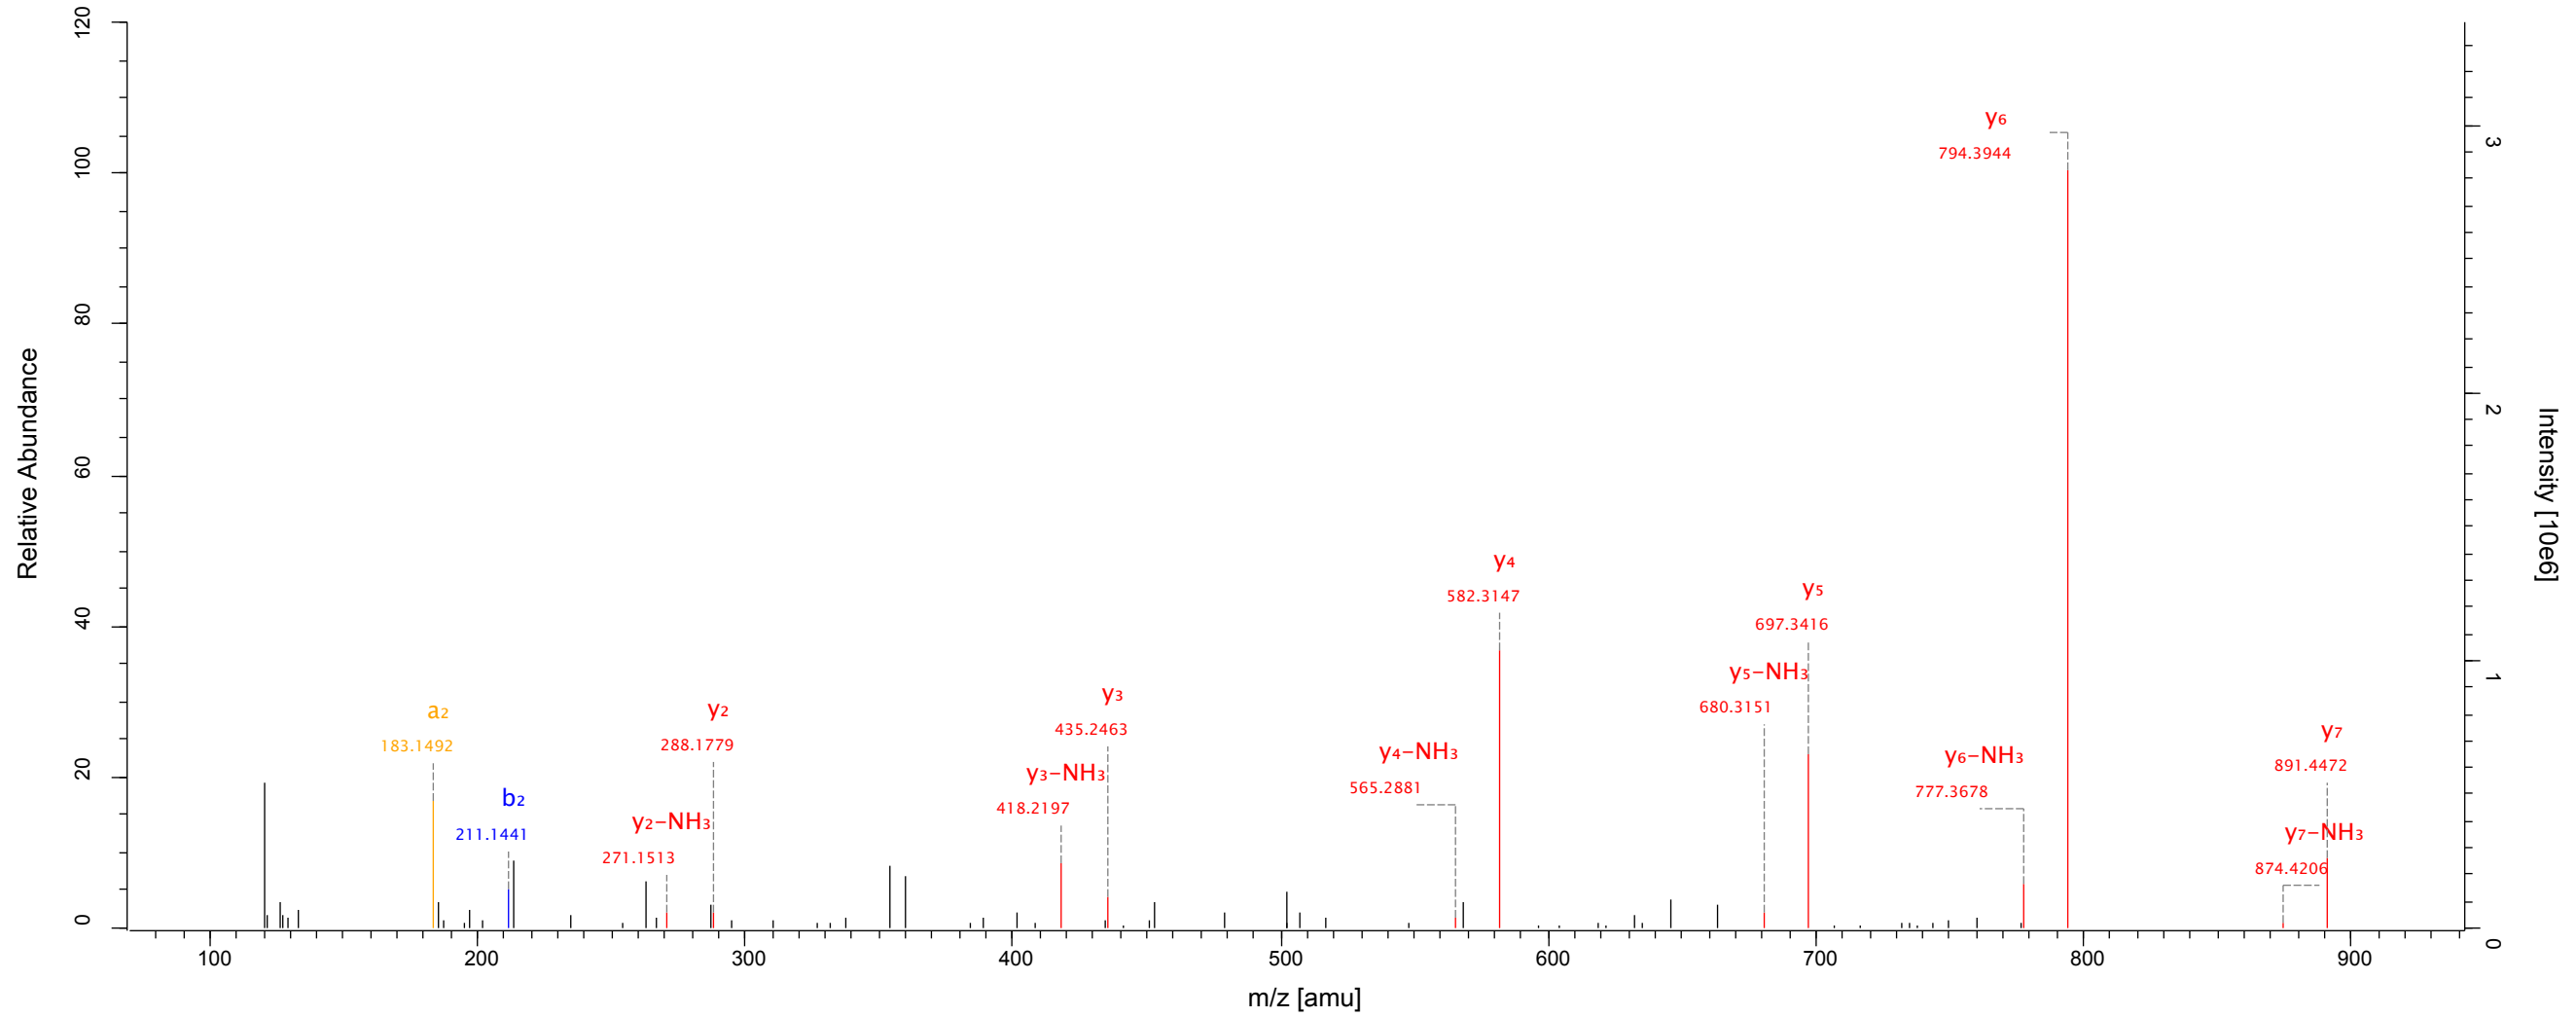

# peptide ID 56

Source: 20120816\_CO\_0340Gaje\_R02  
Scannumber: 13679  
Protein: SinglePep79  
Peptide Score: 70.41  
Method: FTMS; HCD; 1

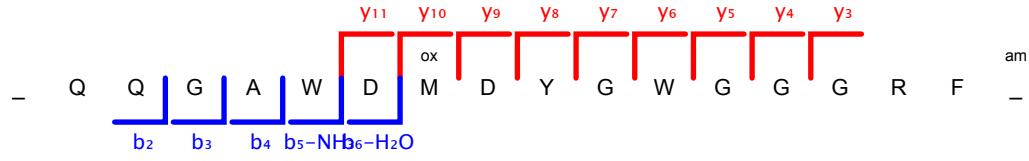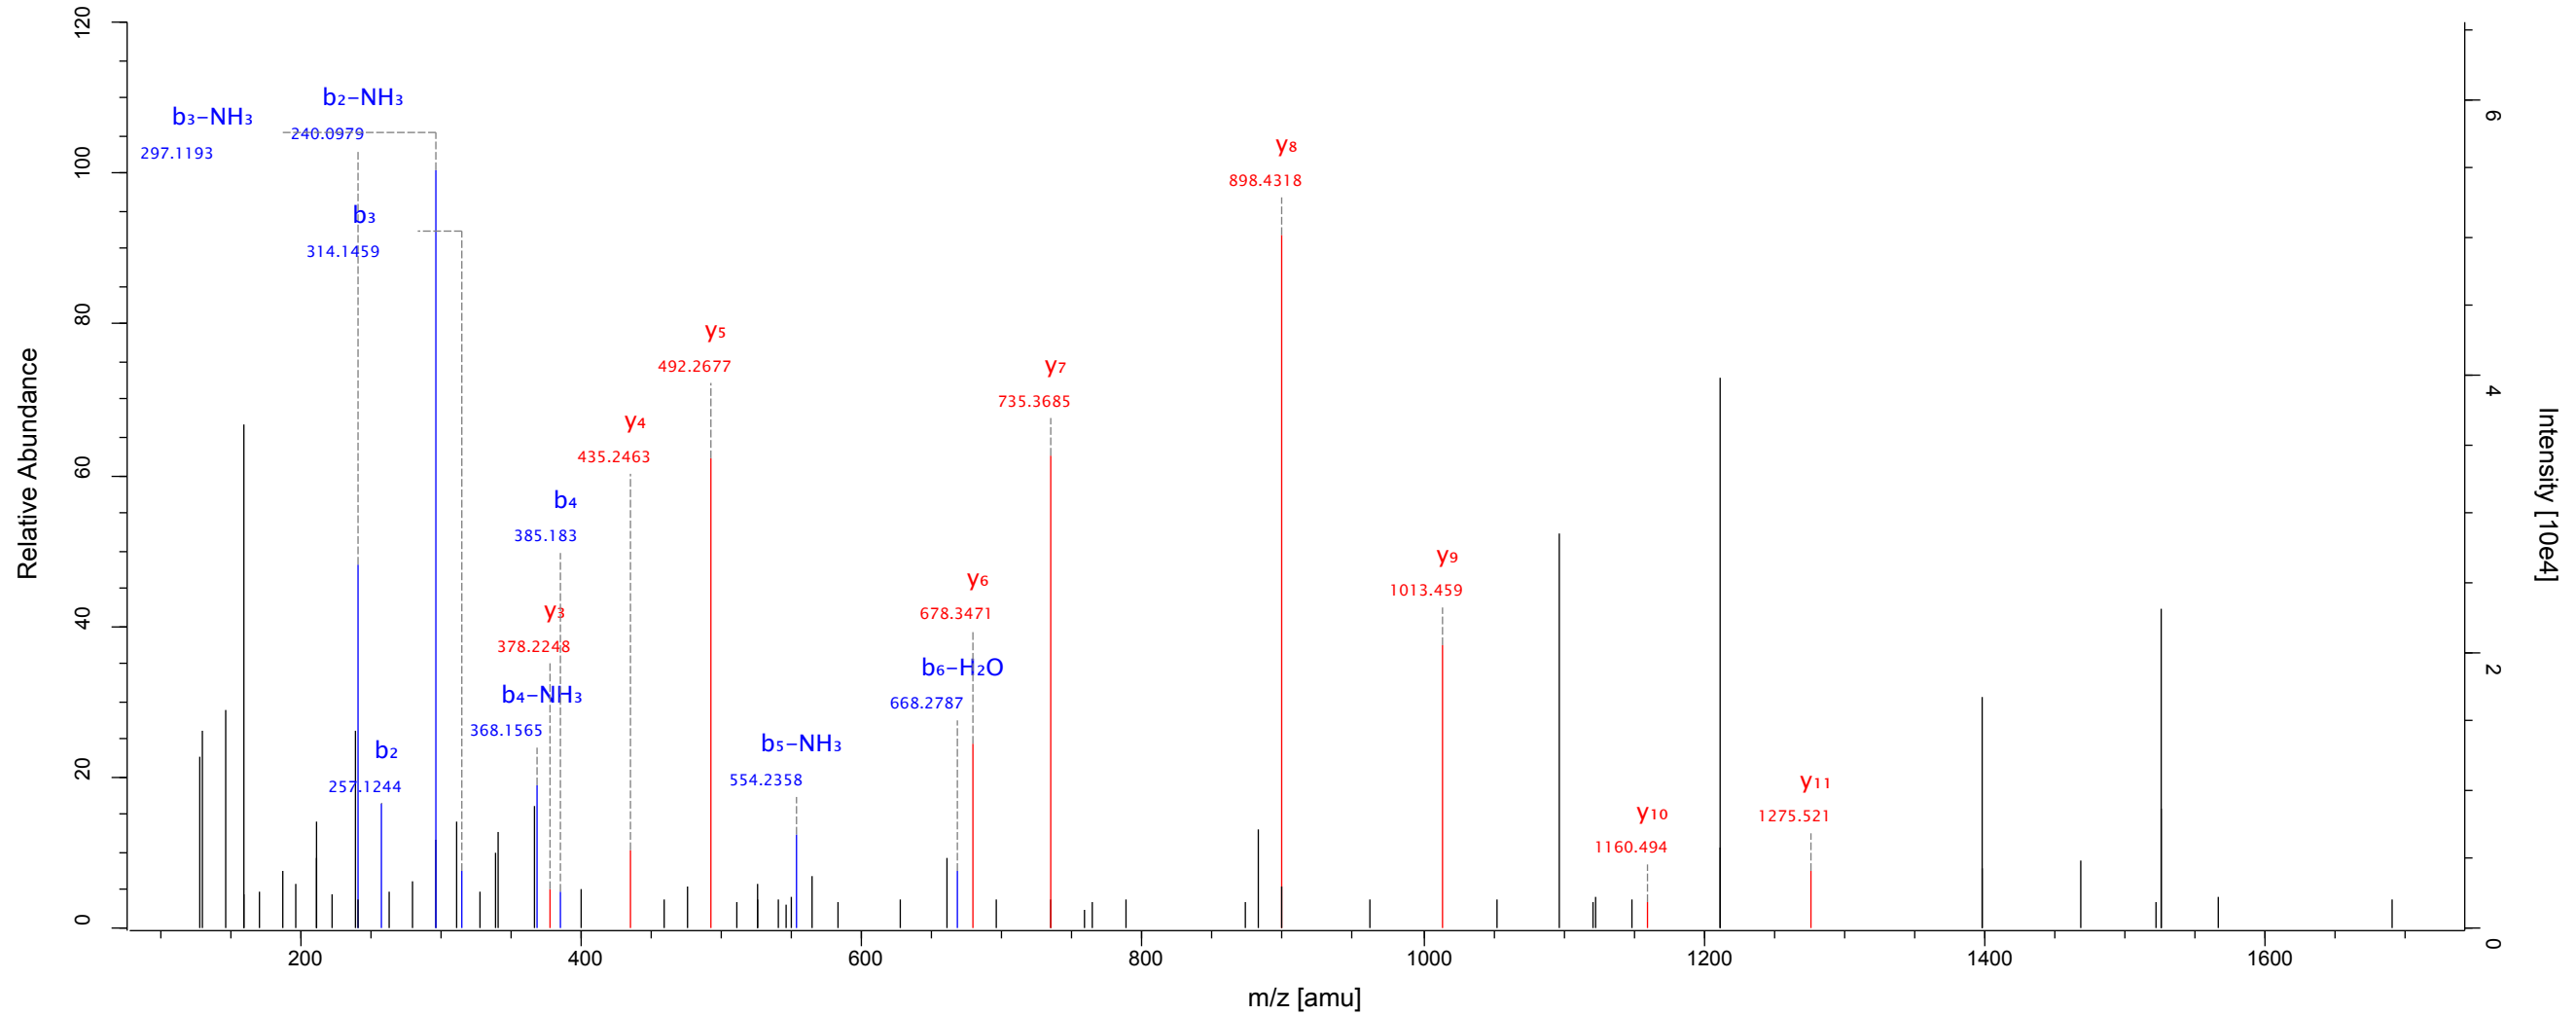

# peptide ID 57

Source: 20121106\_CO\_0340Gaje\_R02\_2  
Scannumber: 14735  
Protein: SinglePep79  
Peptide Score: 70.62  
Method: FTMS; HCD; 1

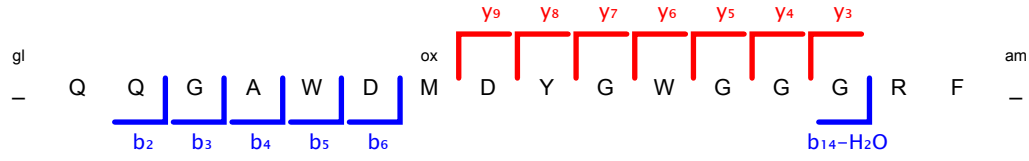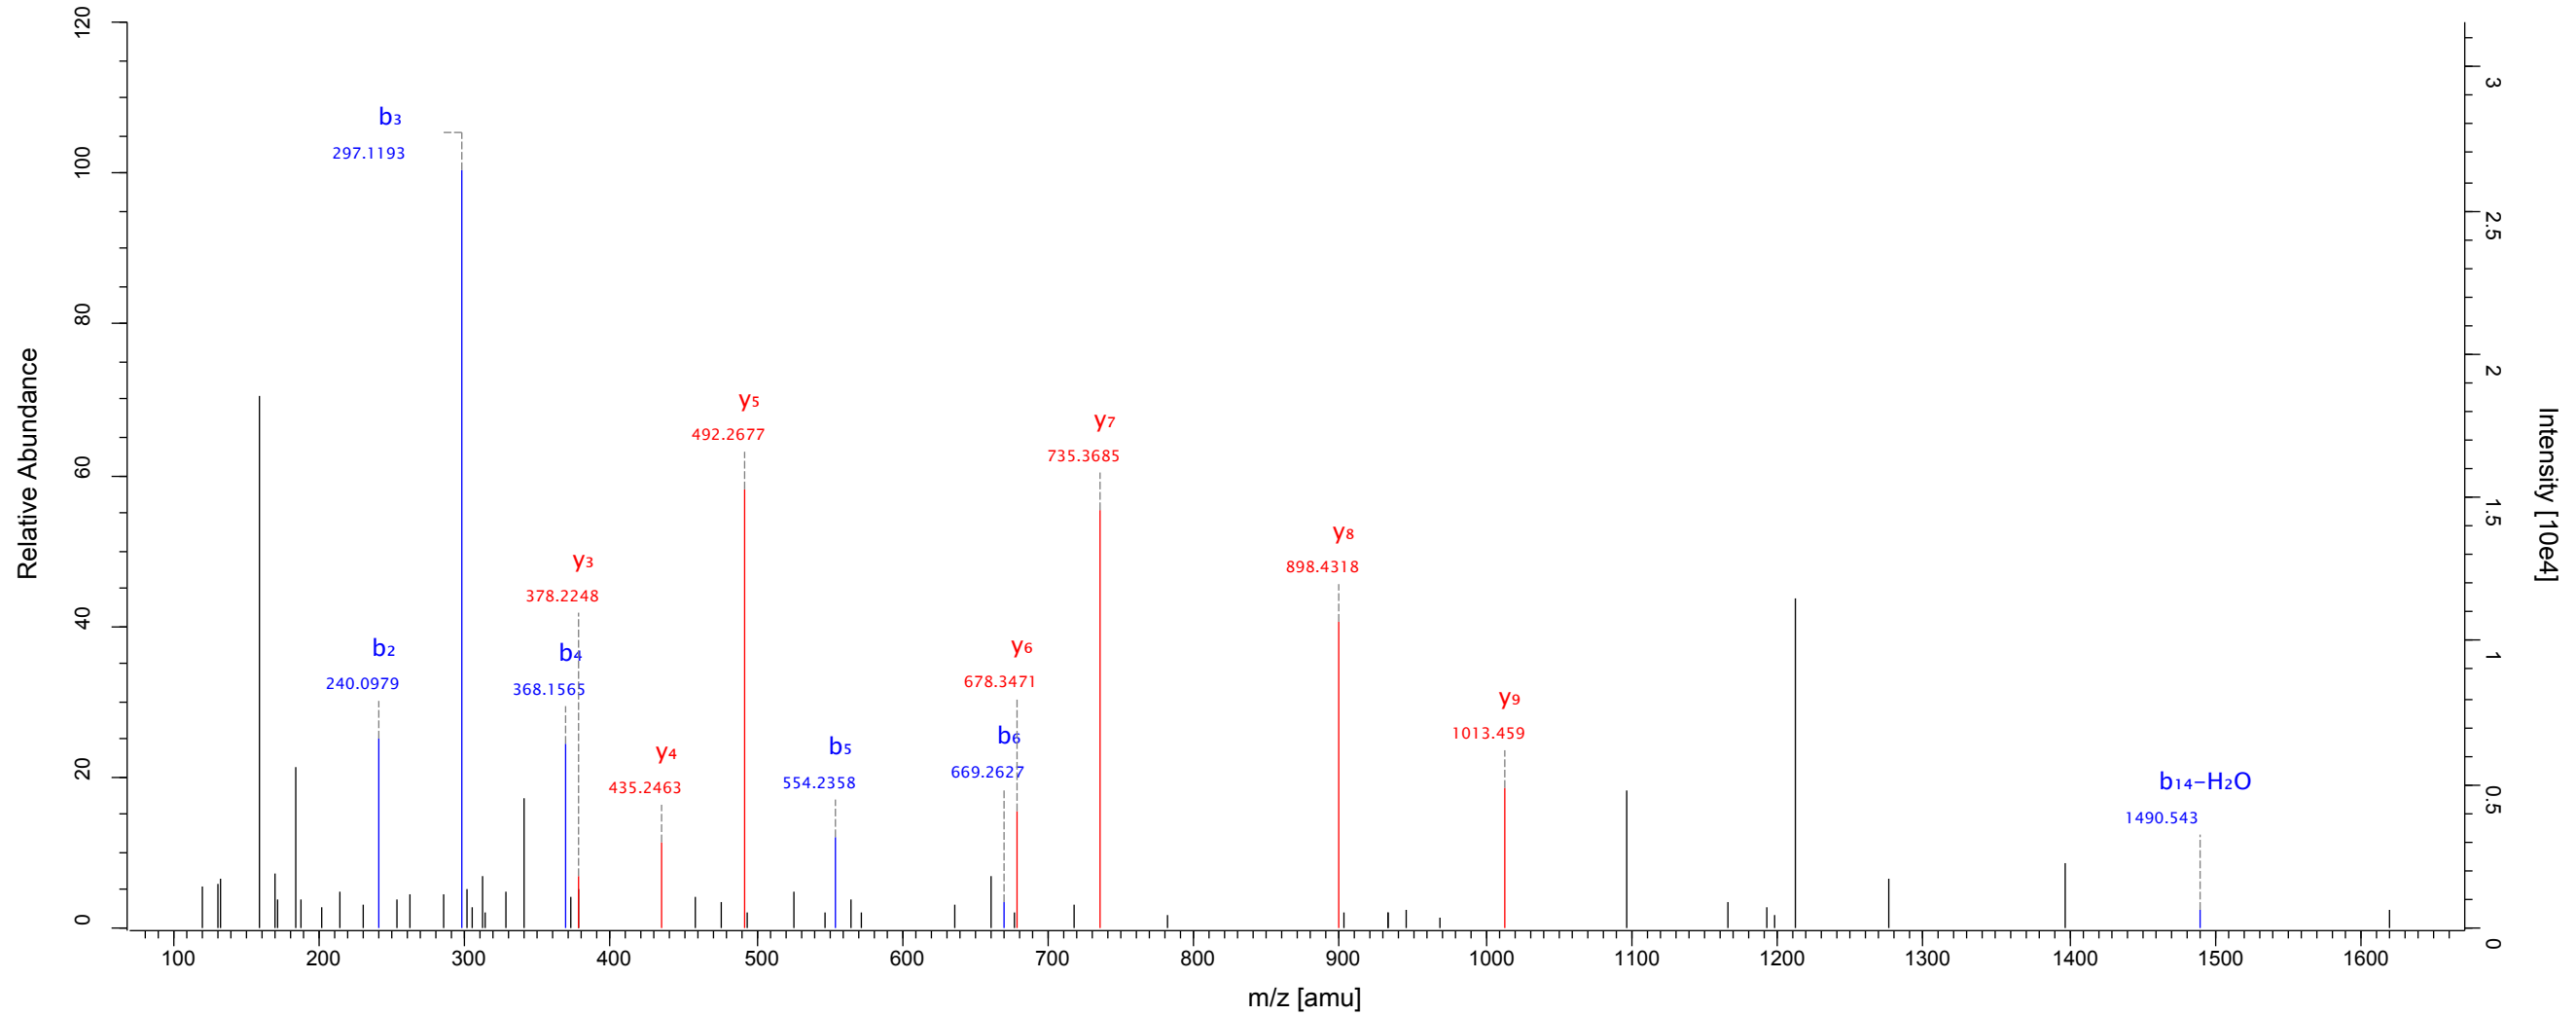

# peptide ID 58

Source: 20120816\_CO\_0340Gaje\_R02  
Scannumber: 12435  
Protein: SinglePep78  
Peptide Score: 86.01  
Method: FTMS; HCD; 1

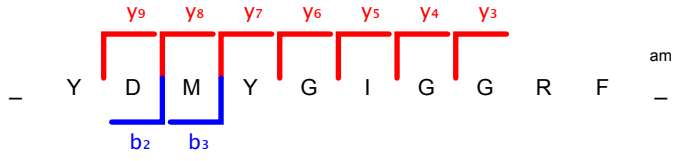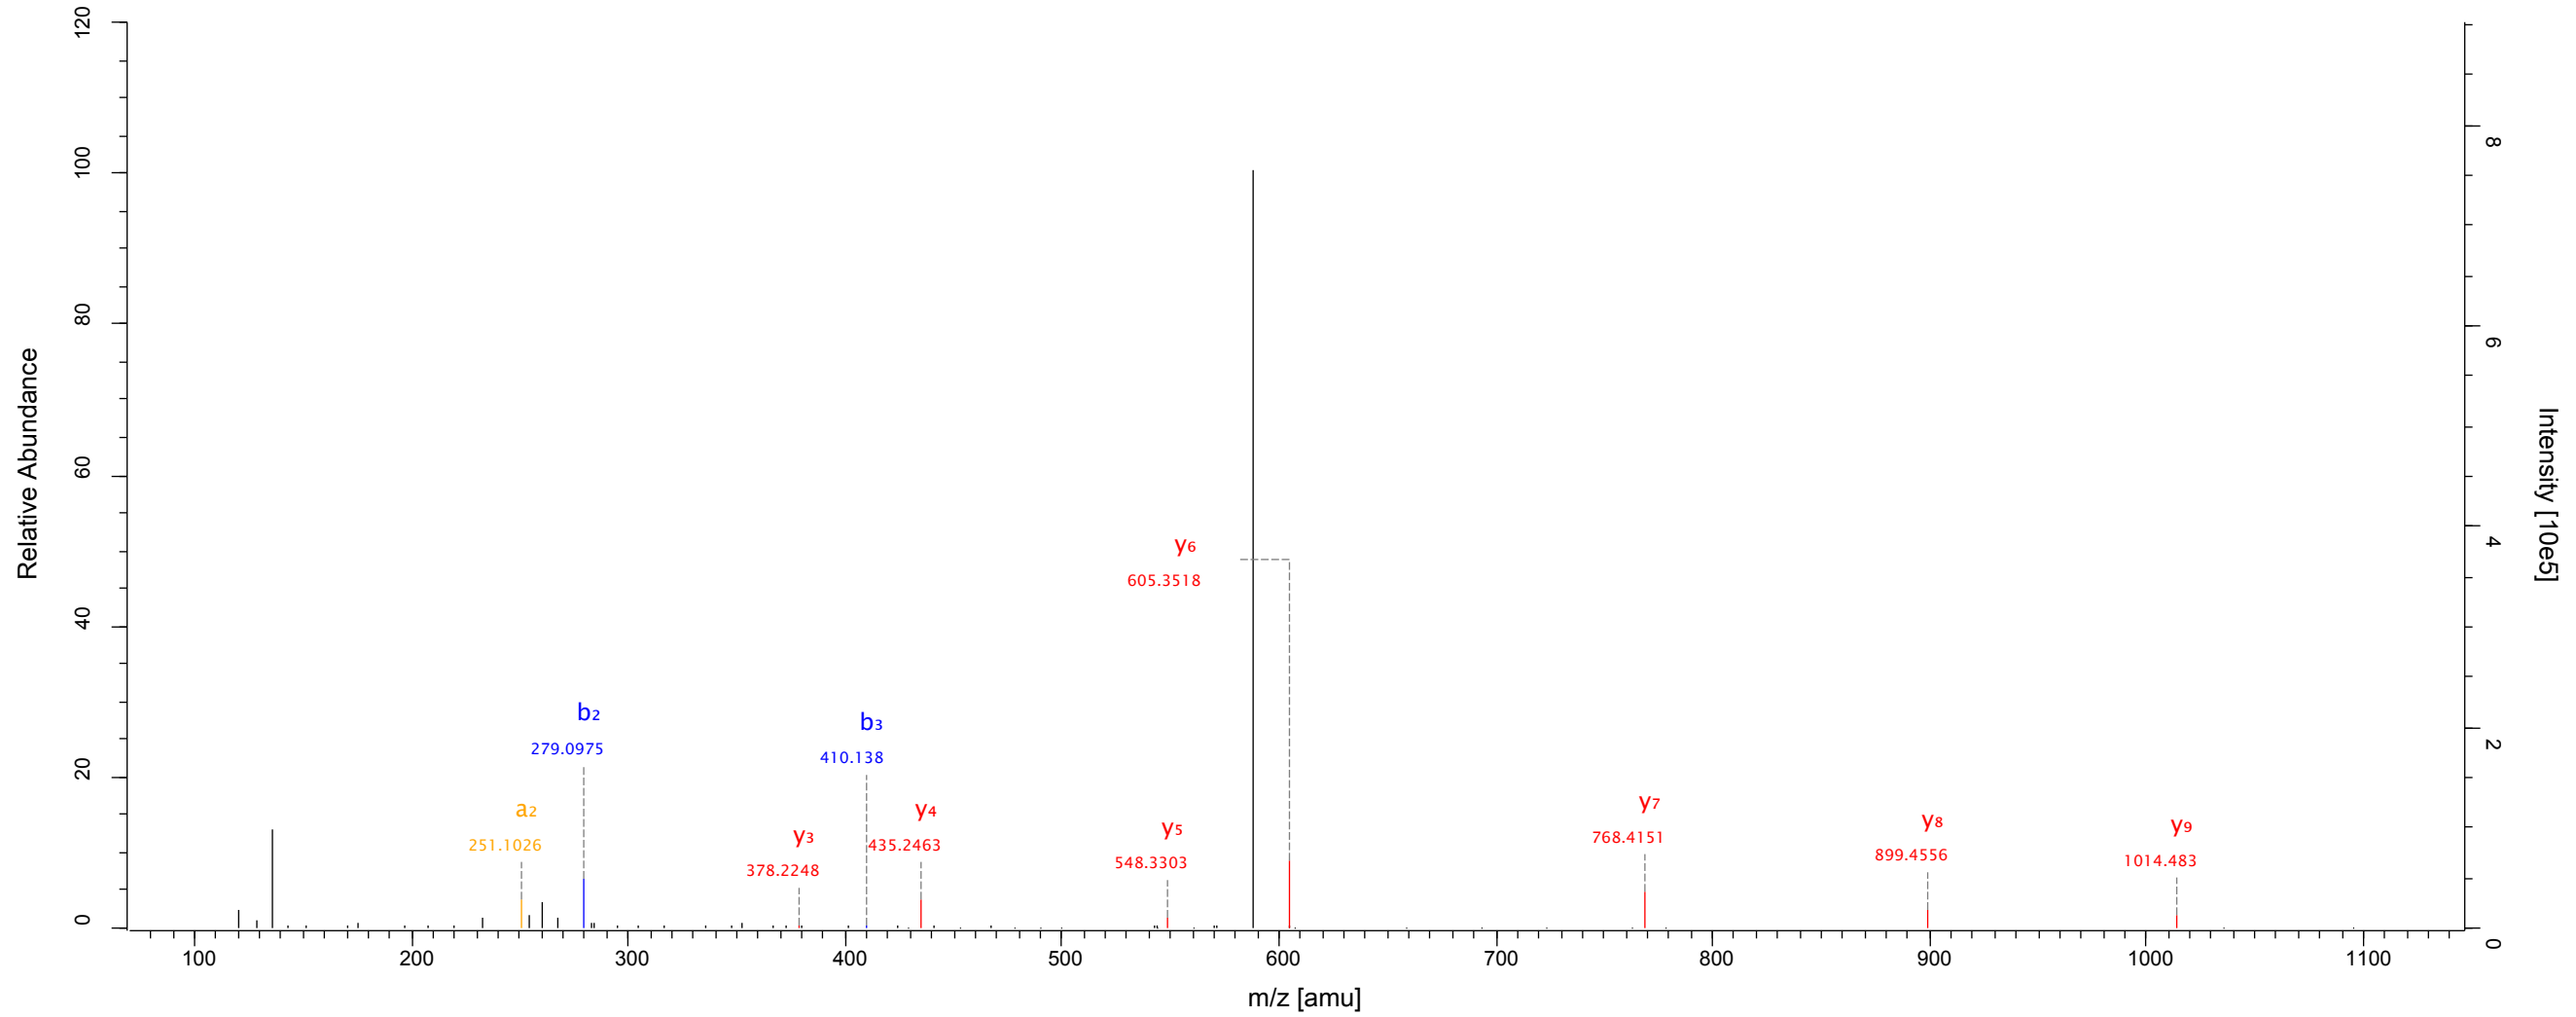

# peptide ID 59

Source: 20120515\_CO\_0340Gaje\_R01  
Scannumber: 16351  
Protein: SinglePep78  
Peptide Score: 72.55  
Method: FTMS; HCD; 1

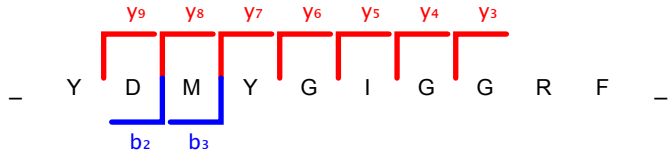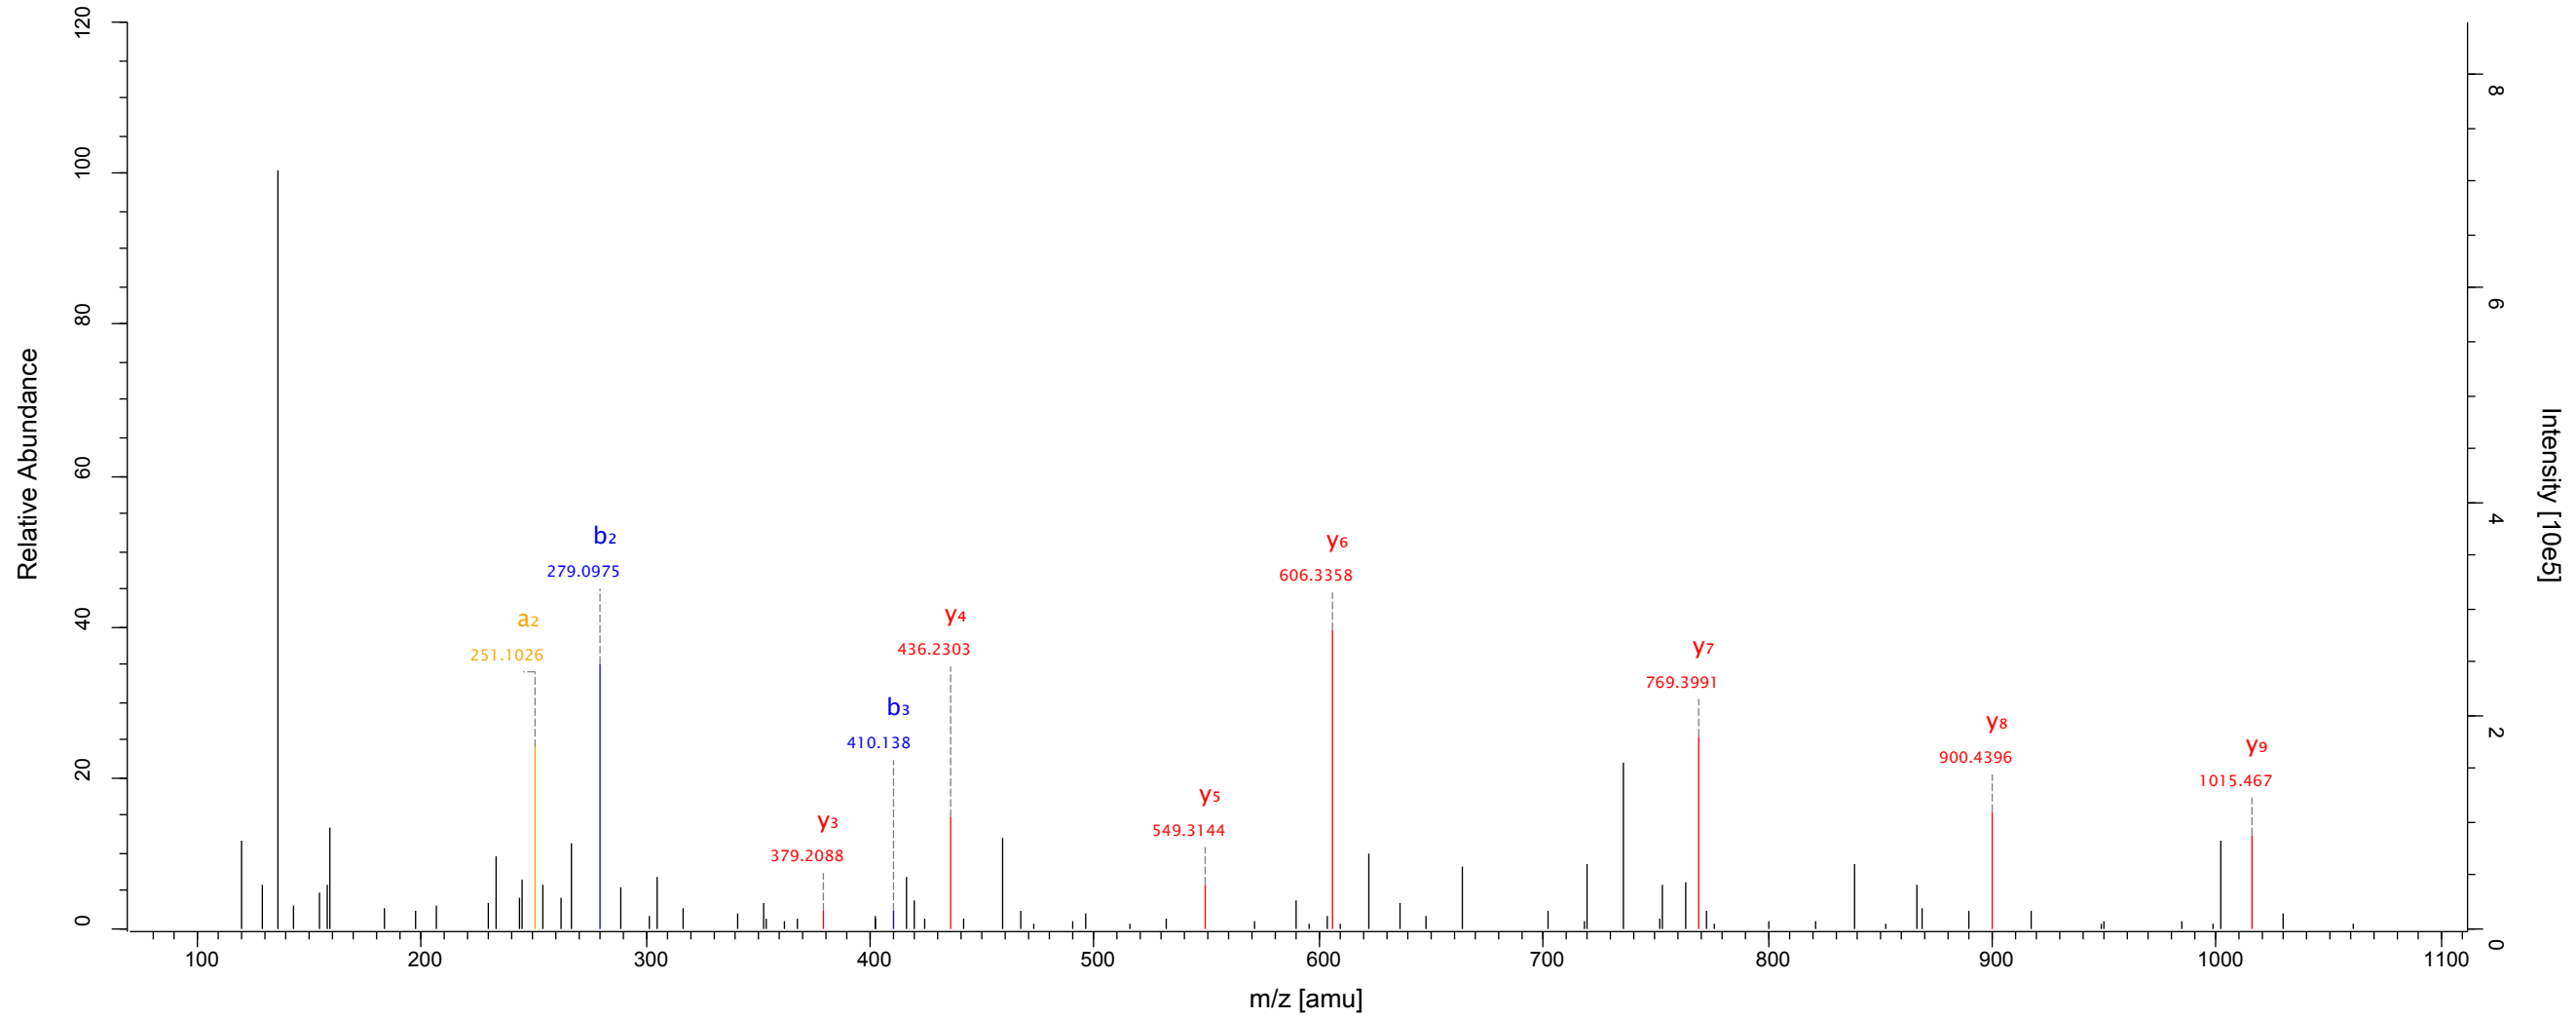

# peptide ID 60

Source: 20120816\_CO\_0340Gaje\_R02  
Scannumber: 10191  
Protein: SinglePep78  
Peptide Score: 83.26  
Method: FTMS; HCD; 1

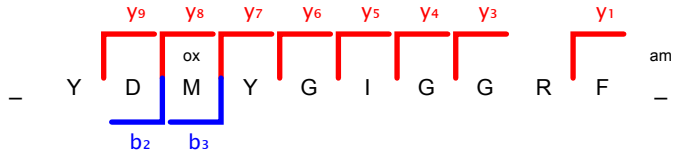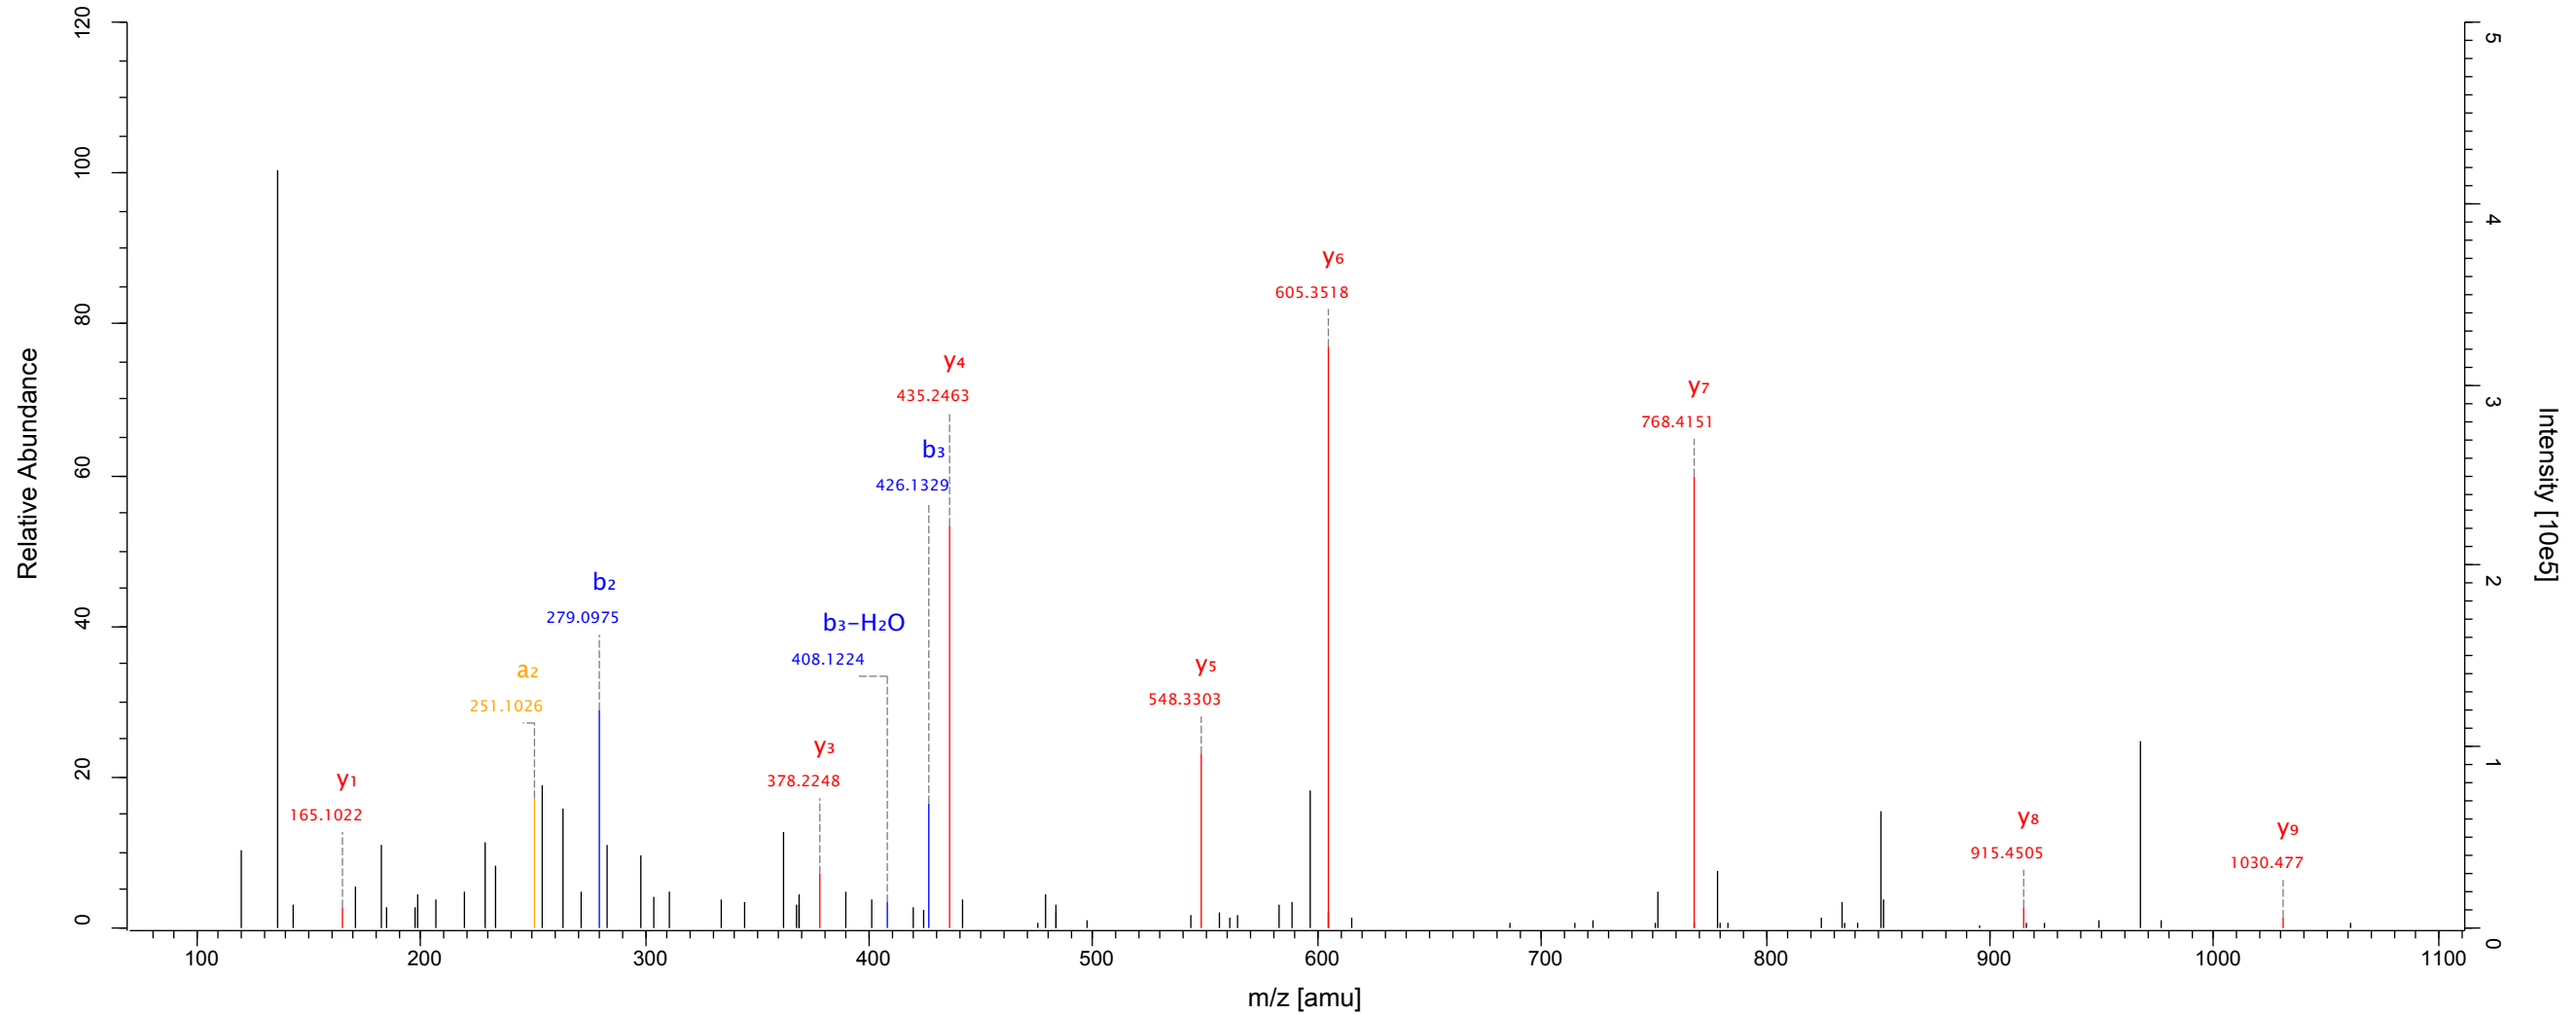



# peptide ID 61

Source: 20121106\_CO\_0340Gaje\_R02\_2  
Scannumber: 10423  
Protein: SinglePep78  
Peptide Score: 86.01  
Method: FTMS; HCD; 1

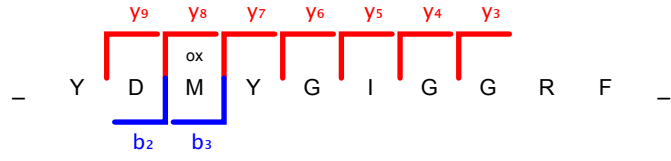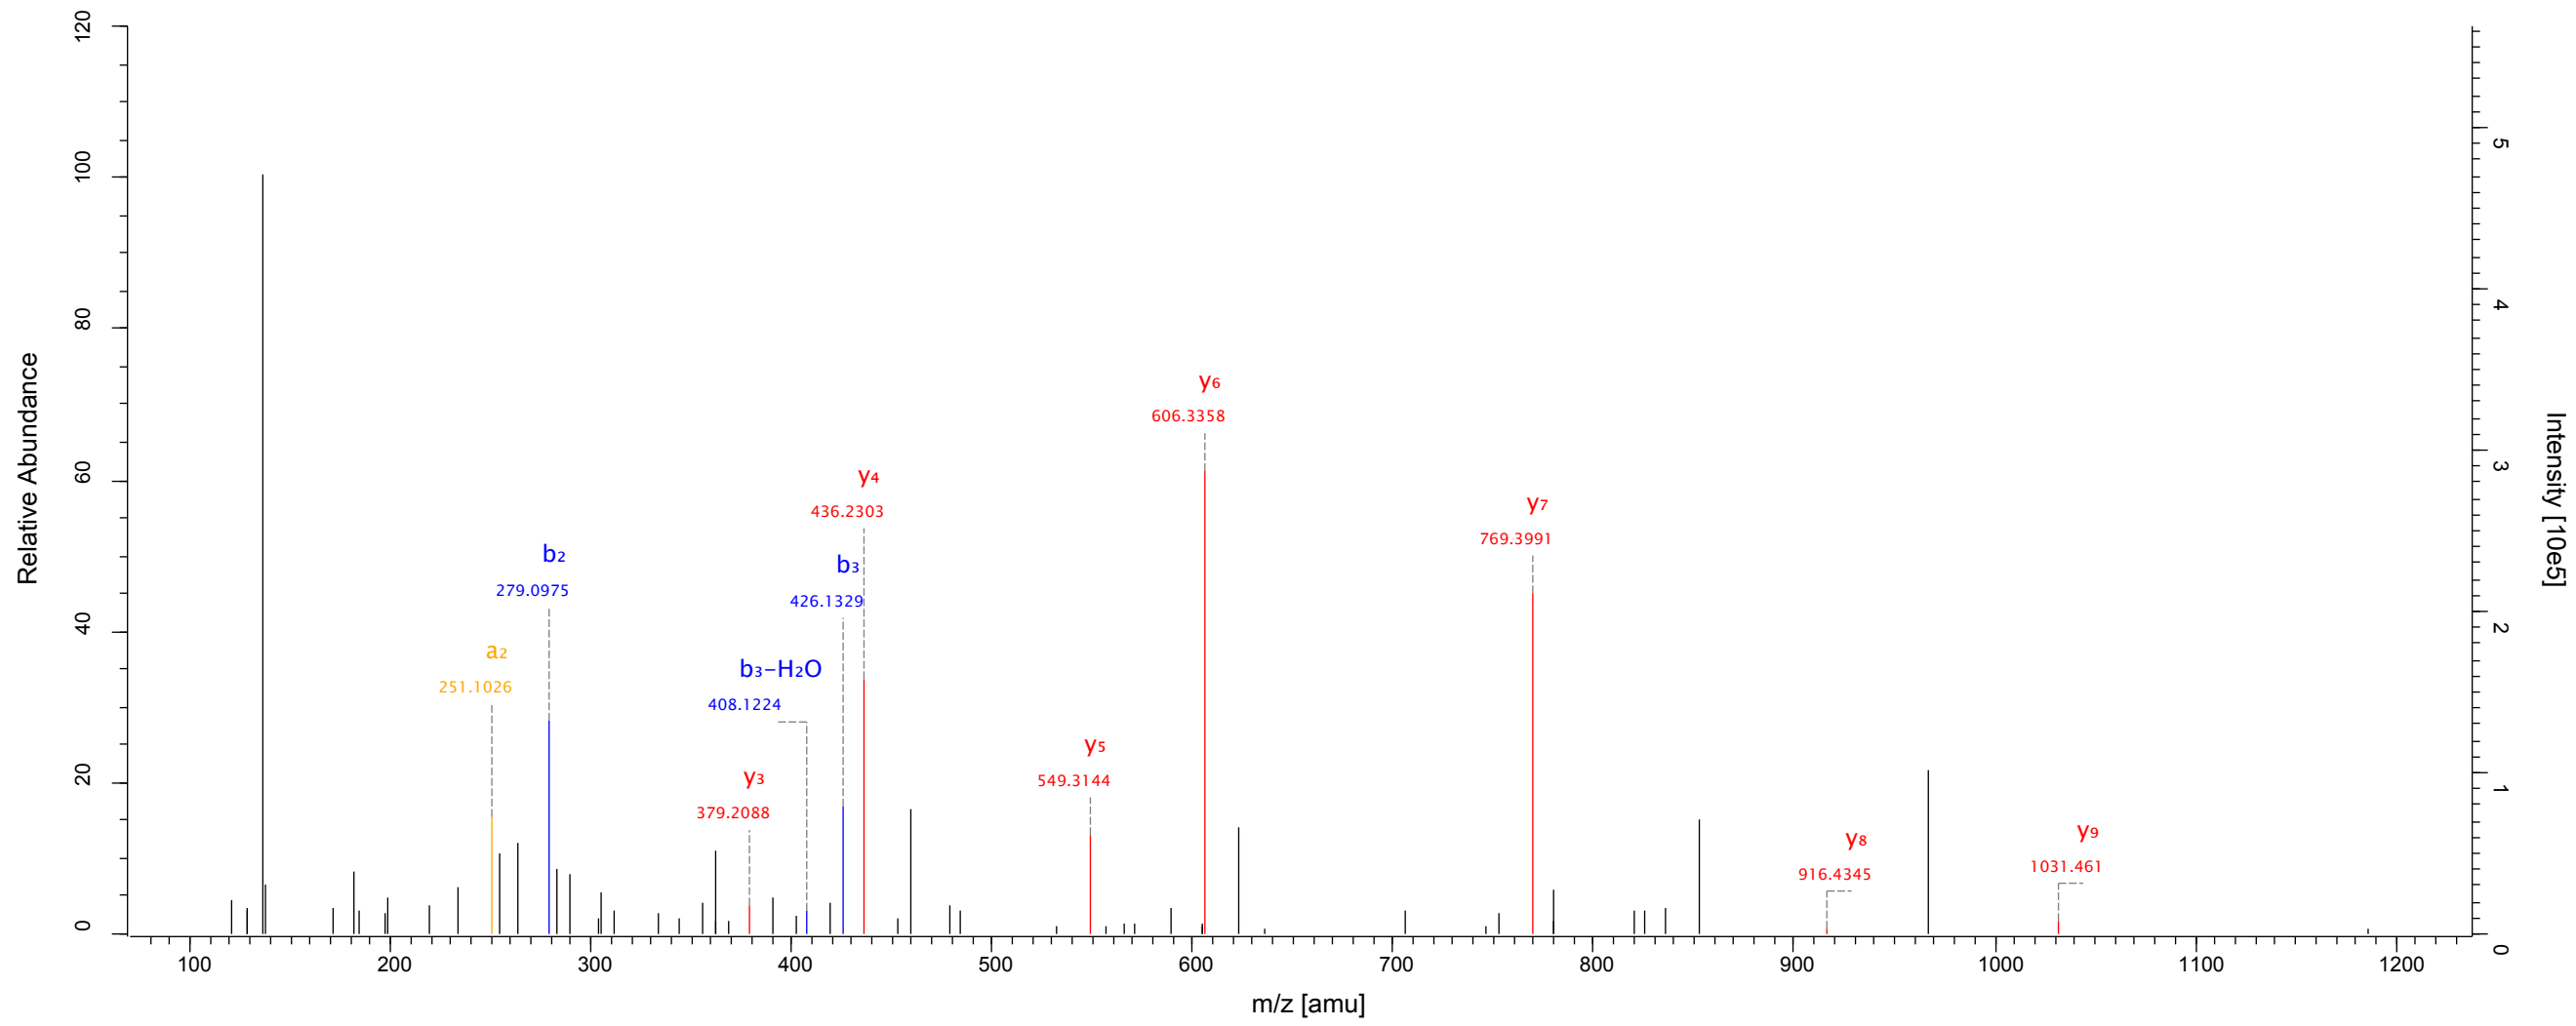

# peptide ID 62

Source: 20120816\_CO\_0340Gaje\_R02  
Scannumber: 16130  
Protein: pep\_secretome\_293  
Peptide Score: 118.71  
Method: FTMS; HCD; 1

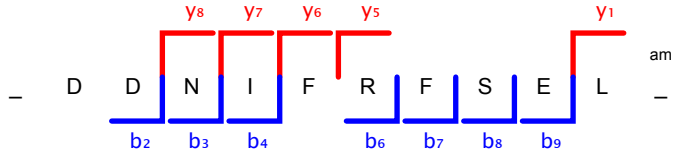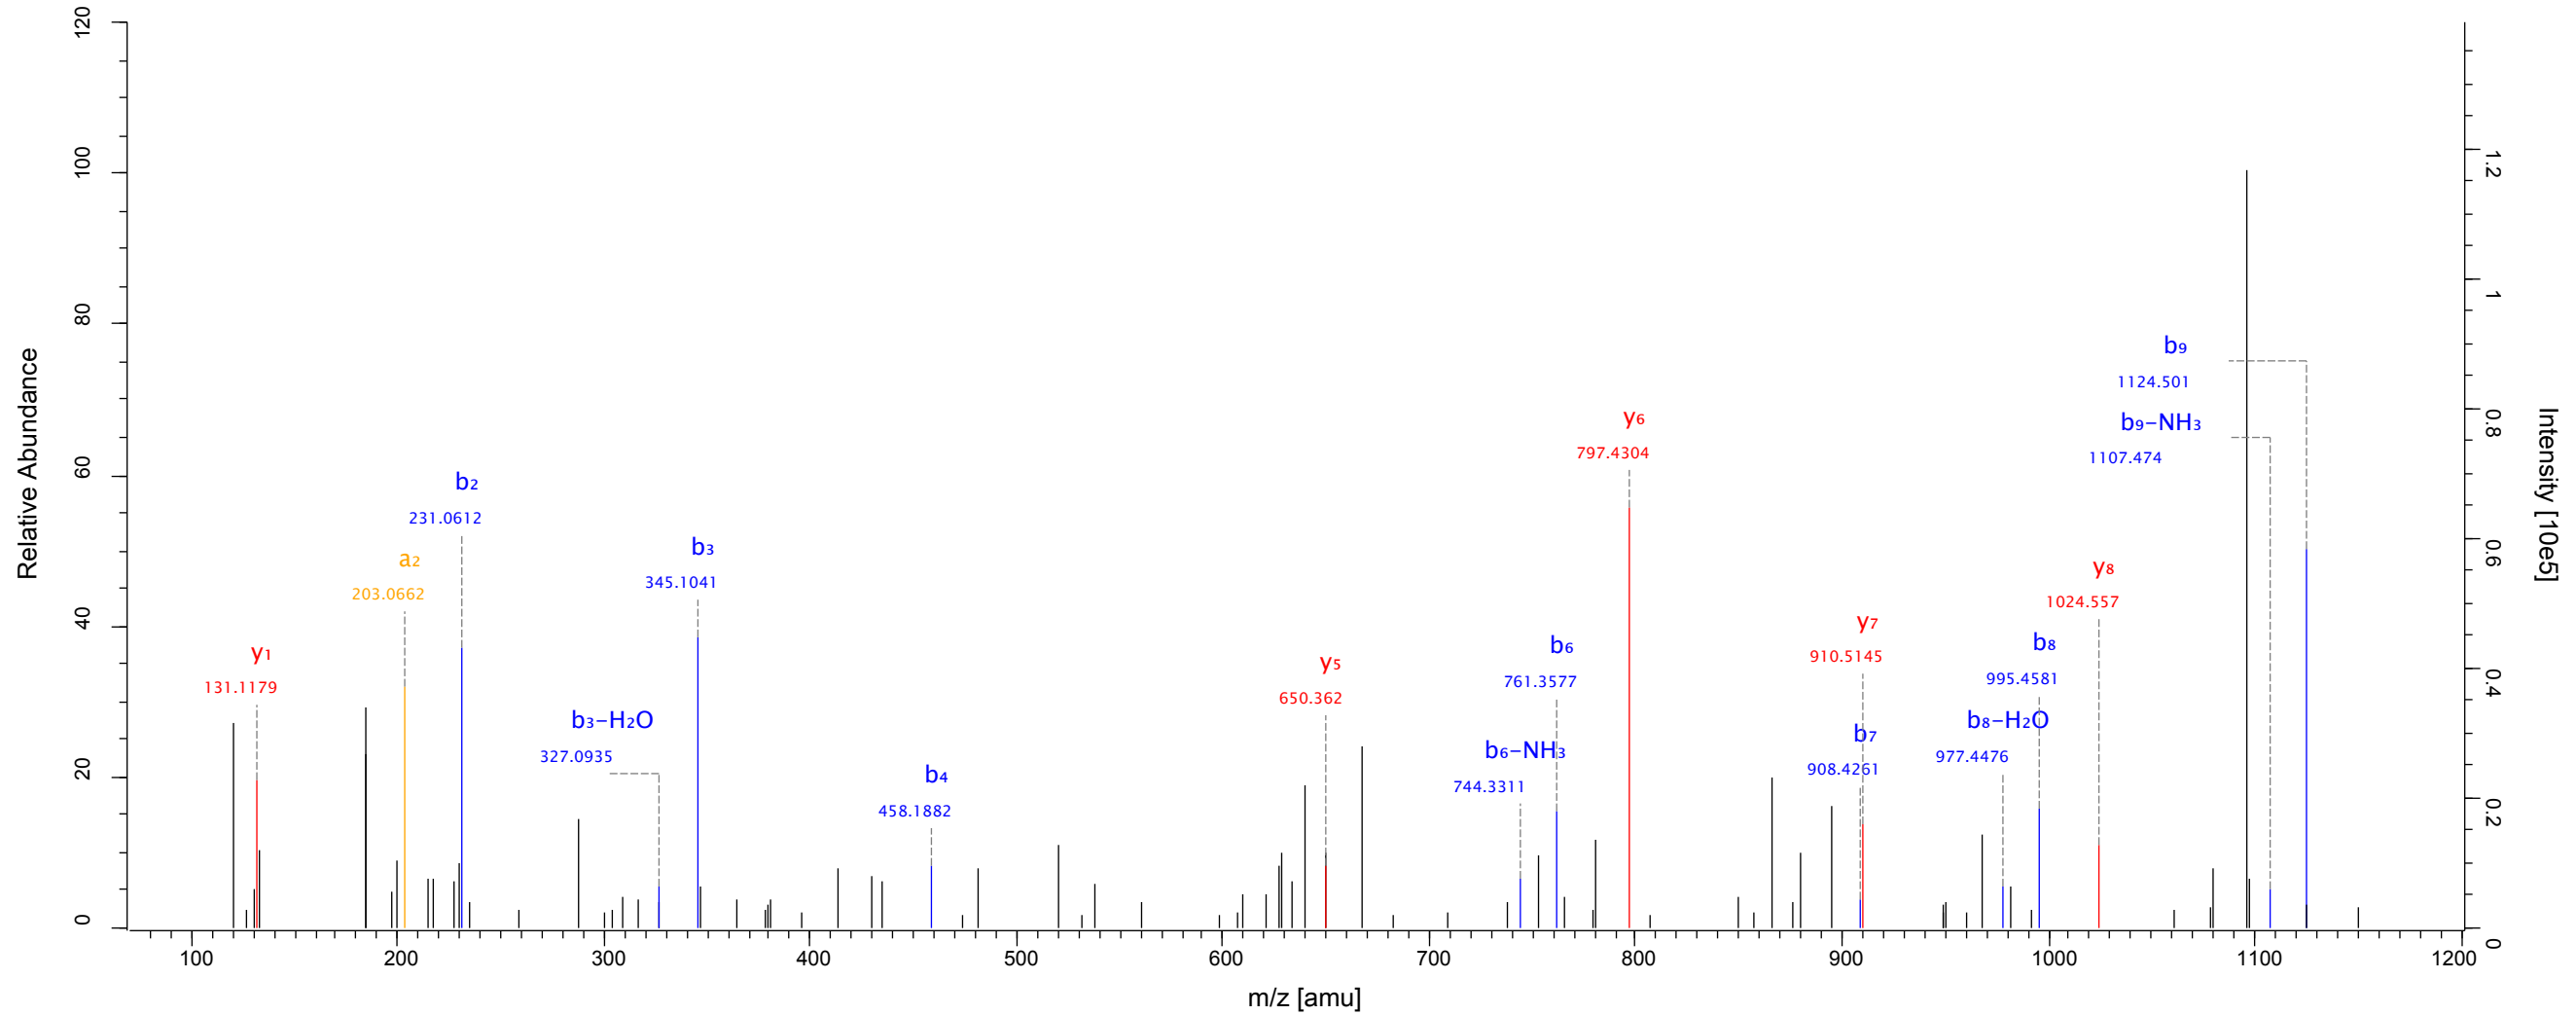

# peptide ID 63

Source: 20120816\_CO\_0340Gaje\_R02  
Scannumber: 10960  
Protein: pep\_secretome\_294  
Peptide Score: 80.22  
Method: FTMS; HCD; 1

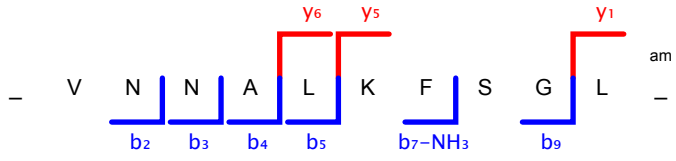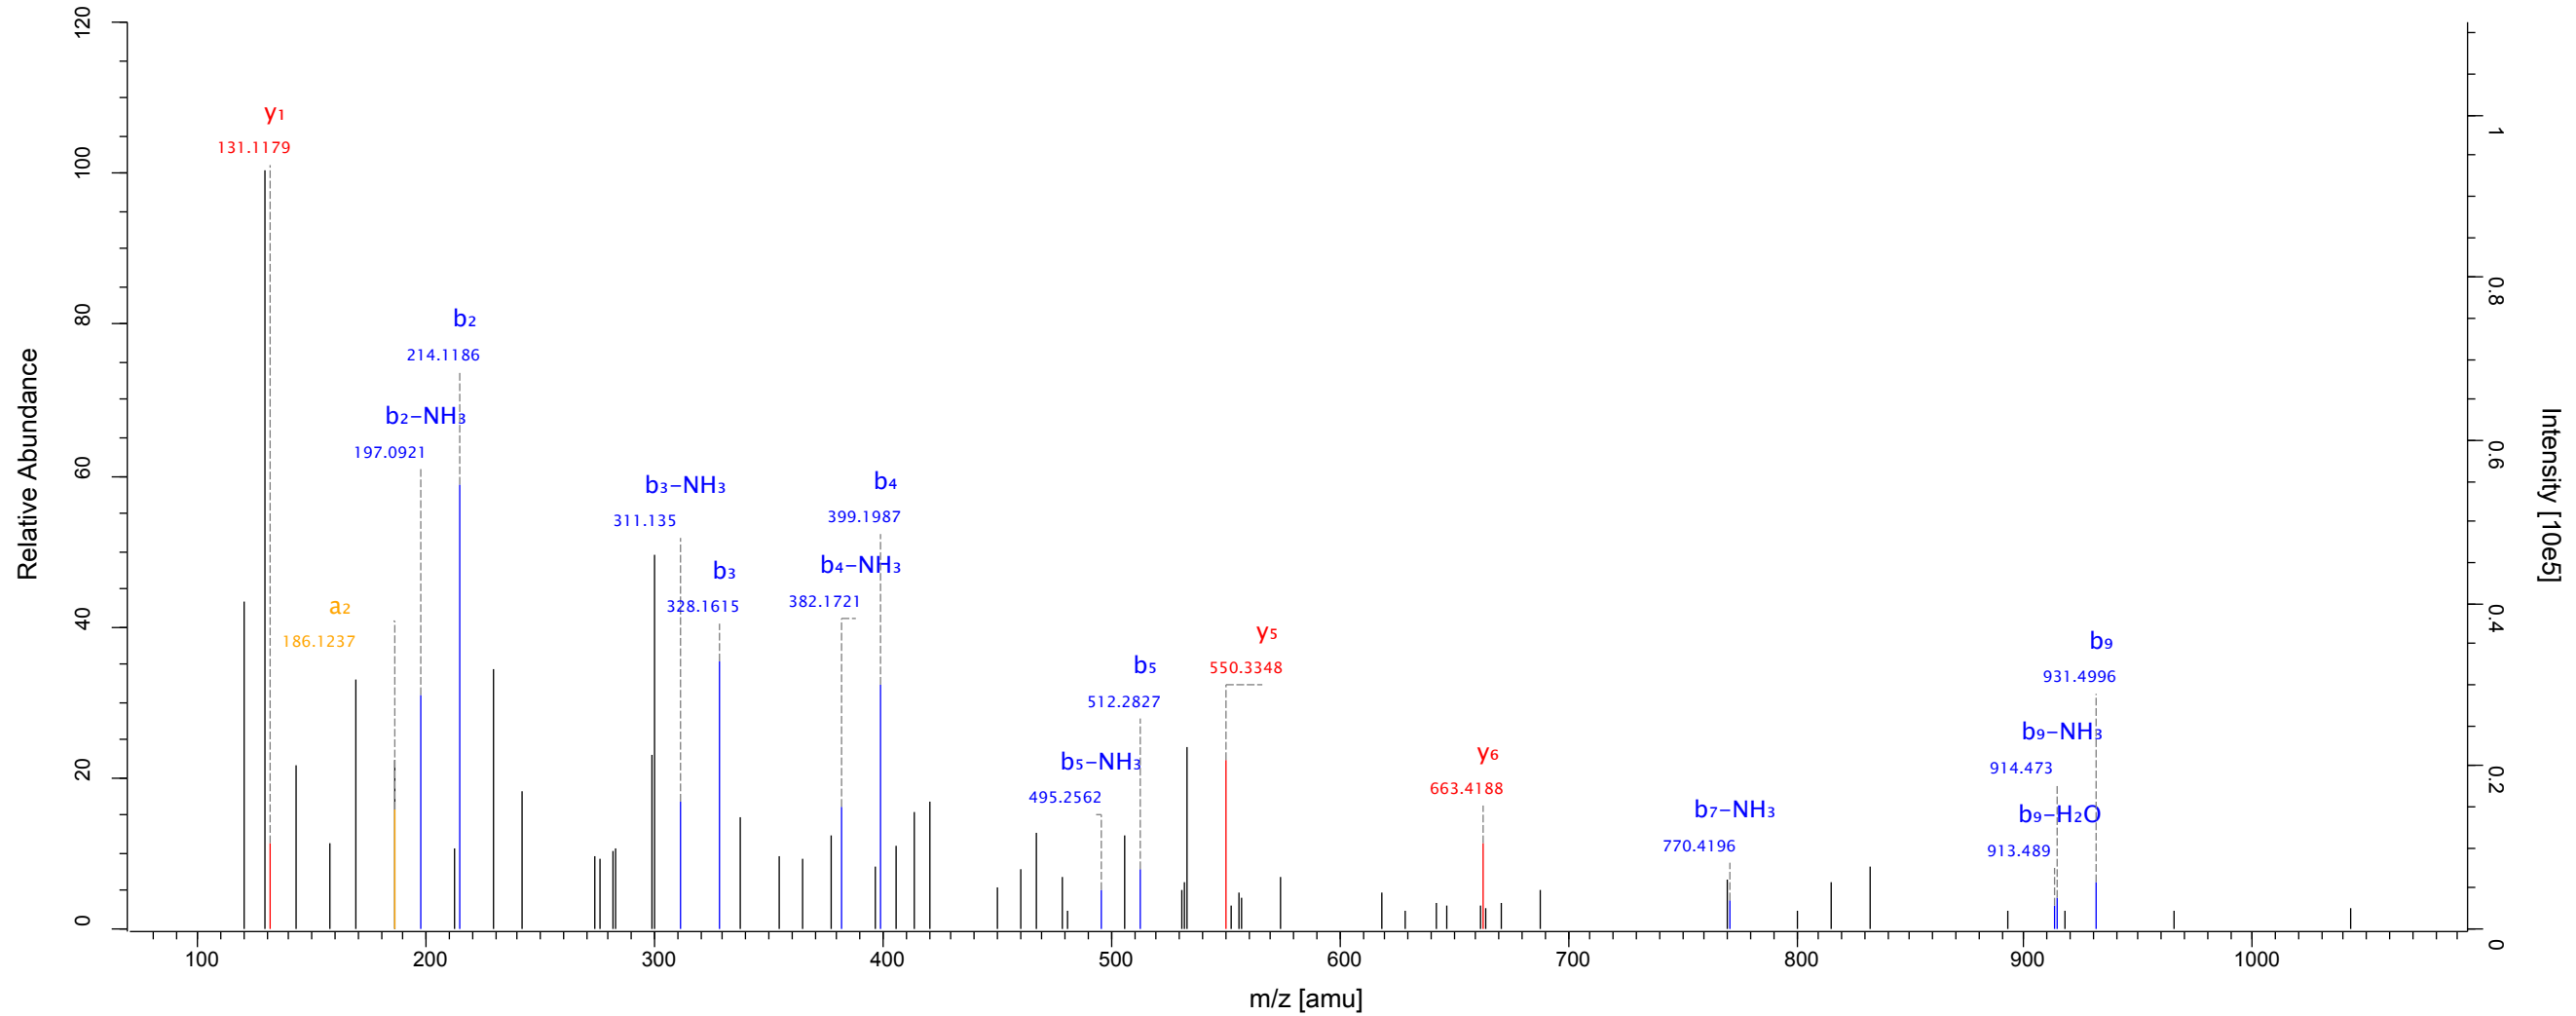

# peptide ID 64

Source: 20120816\_CO\_0340Gaje\_R02  
Scannumber: 10500  
Protein: pep\_secretome\_32  
Peptide Score: 74.46  
Method: FTMS; HCD; 1

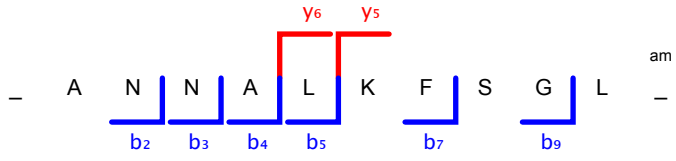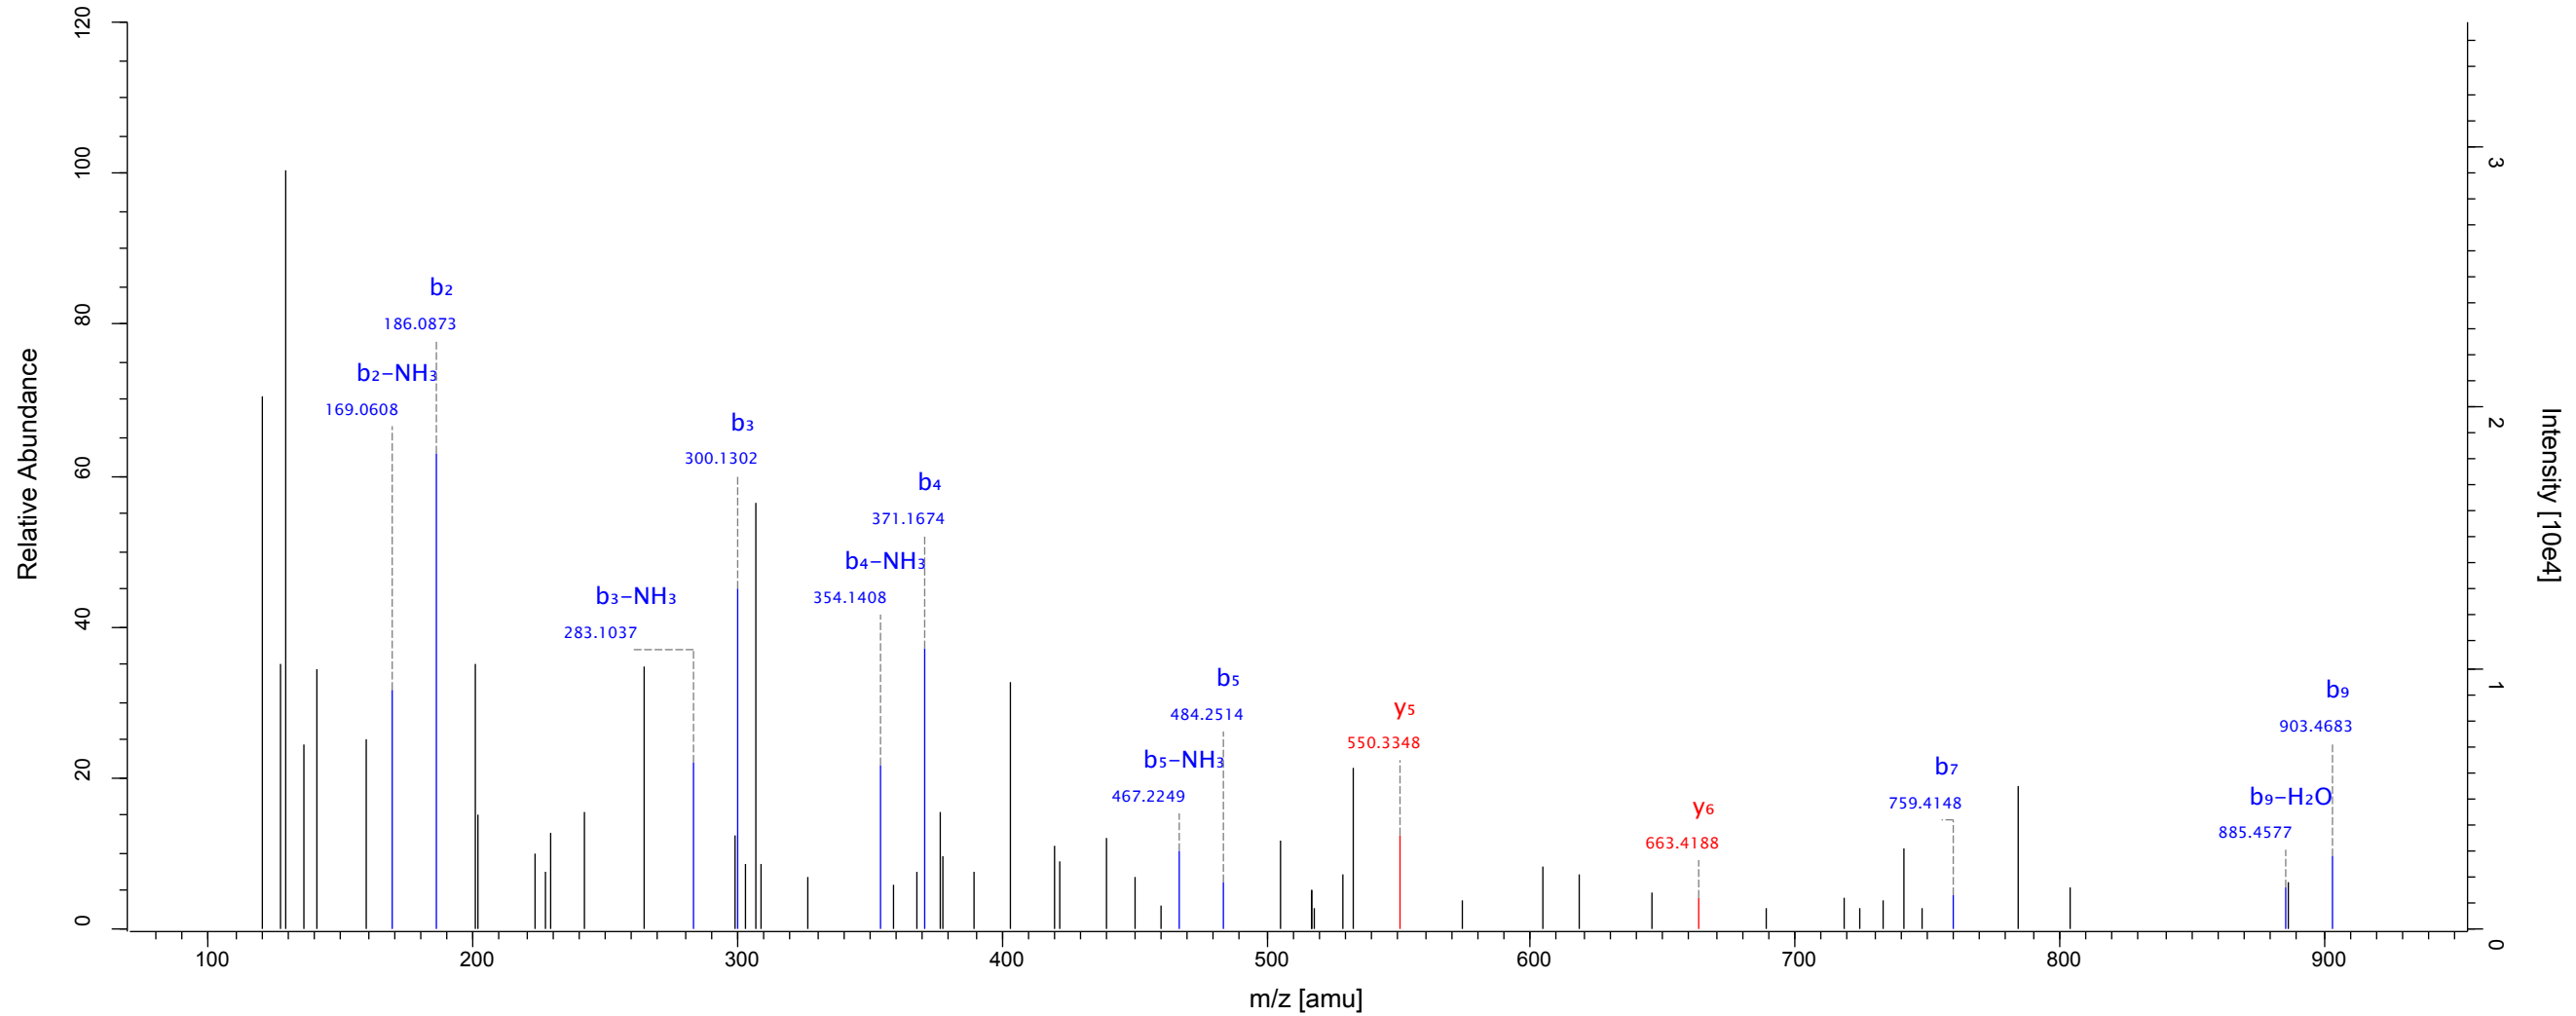

# peptide ID 65

Source: 20121106\_CO\_0340Gaje\_R02\_2  
Scannumber: 10221  
Protein: pep\_secretome\_26; pep\_secretome\_28; pep\_secretome\_30  
Peptide Score: 121.73  
Method: FTMS; HCD; 1

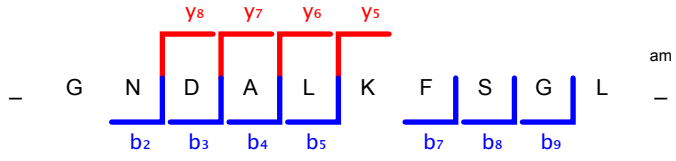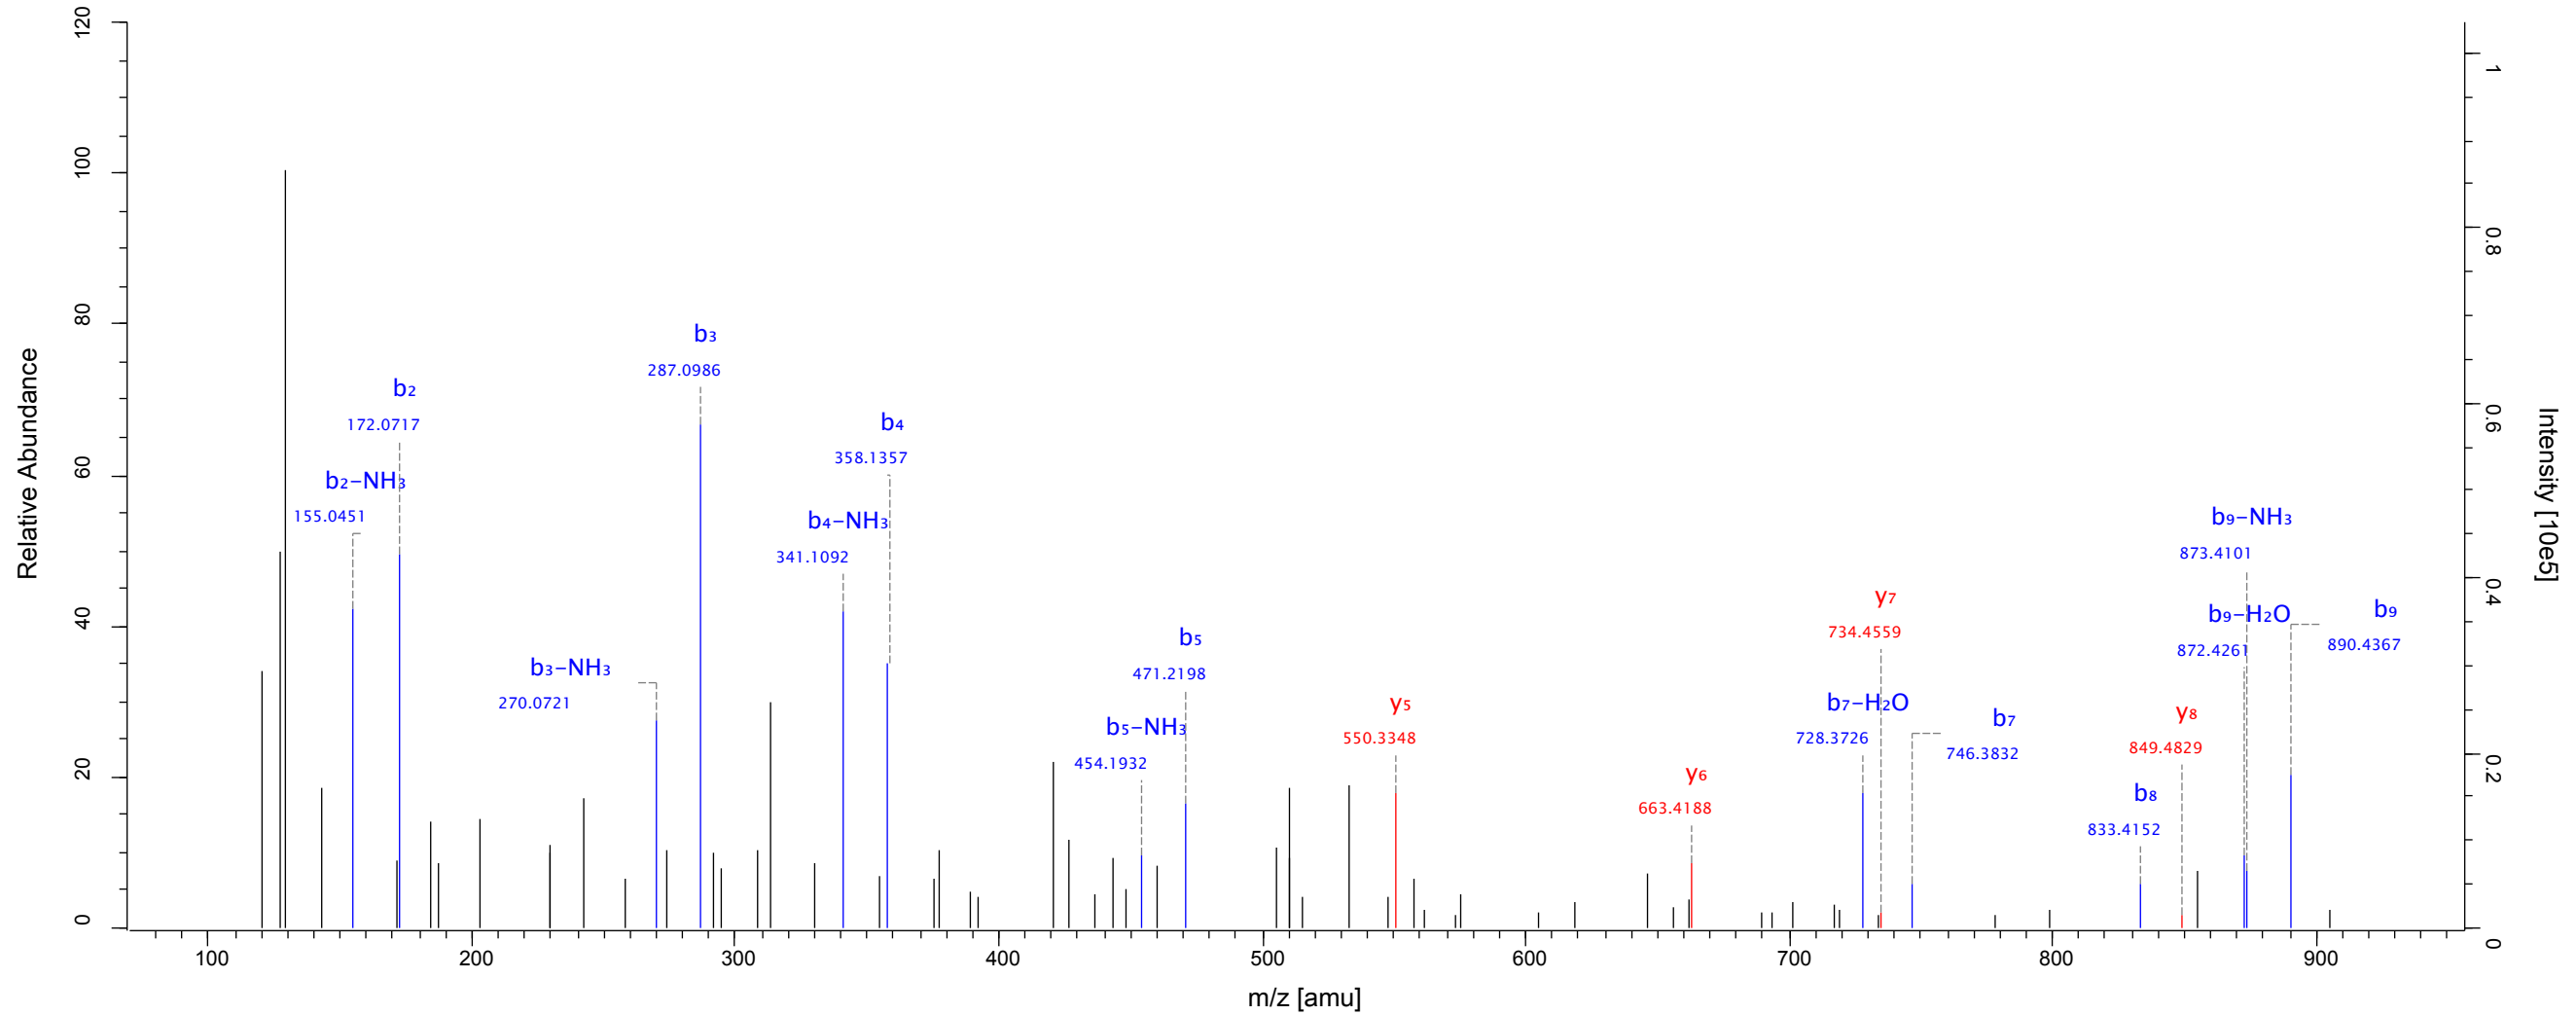

# peptide ID 66

Source: 20121106\_CO\_0340Gaje\_R02\_2  
Scannumber: 9929  
Protein: pep\_5; pep\_secretome\_579  
Peptide Score: 72.61  
Method: FTMS; HCD; 1

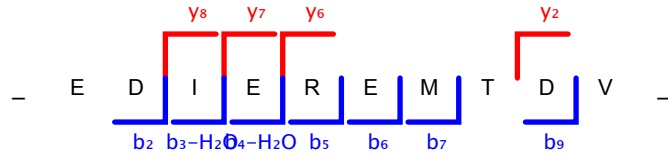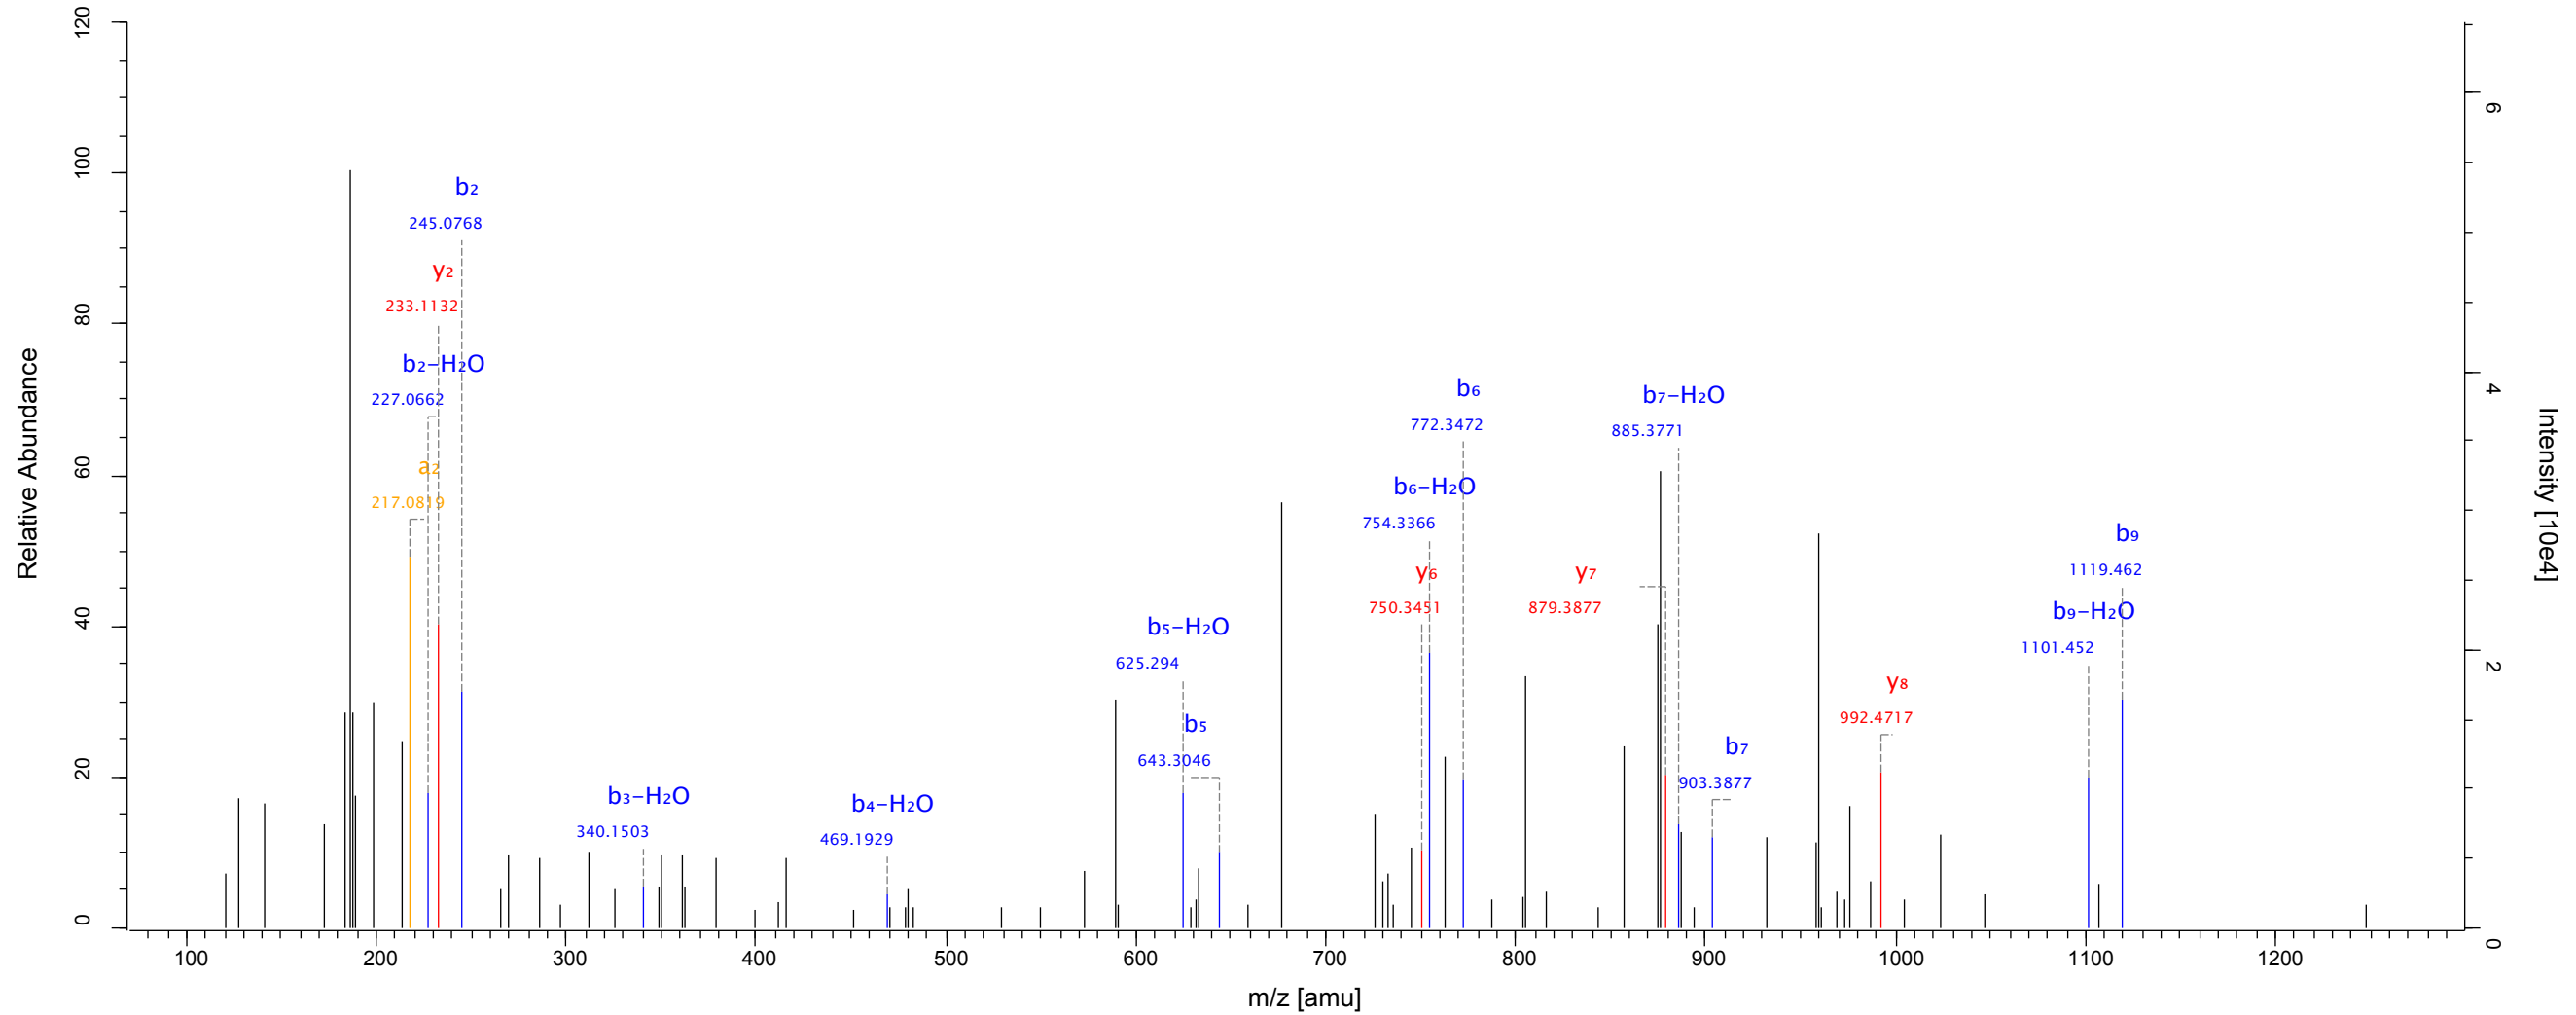

# peptide ID 67

Source: 20120816\_CO\_0340Gaje\_R02  
Scannumber: 10799  
Protein: SinglePep76  
Peptide Score: 88.06  
Method: FTMS; HCD; 1

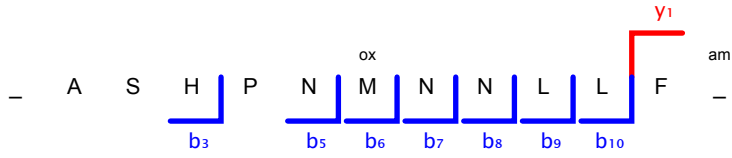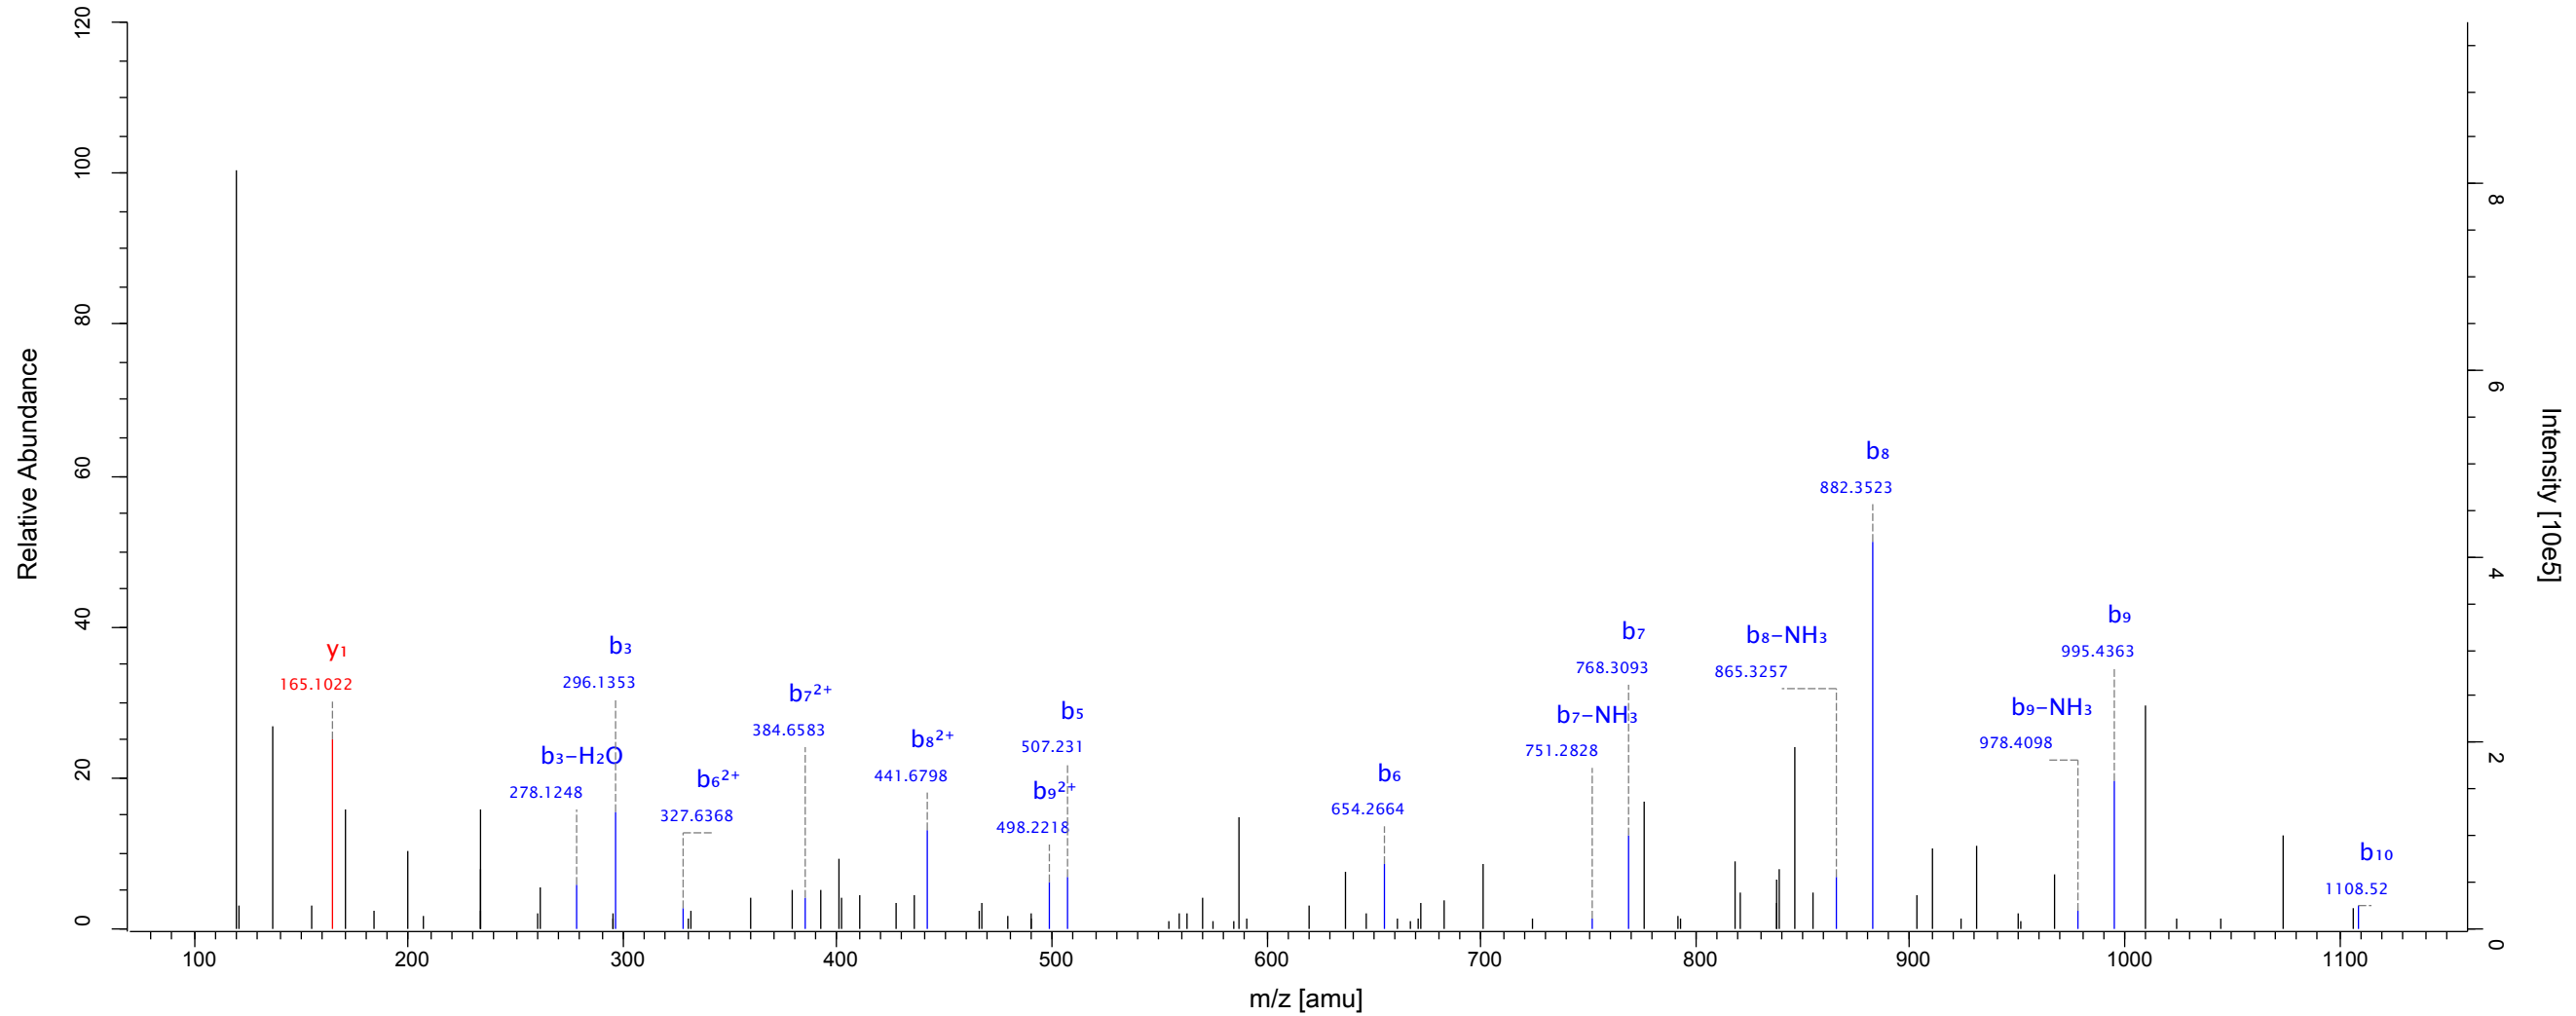

# peptide ID 68

Source: 20120816\_CO\_0340Gaje\_R02  
Scannumber: 10511  
Protein: orf\_6877; orf\_7269; pep\_176; pep\_secretome\_482  
Peptide Score: 121.83  
Method: FTMS; HCD; 1

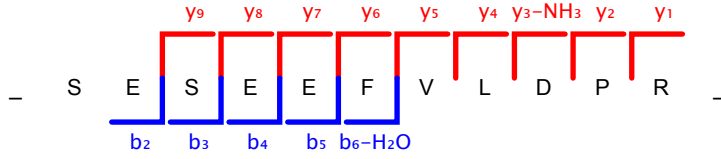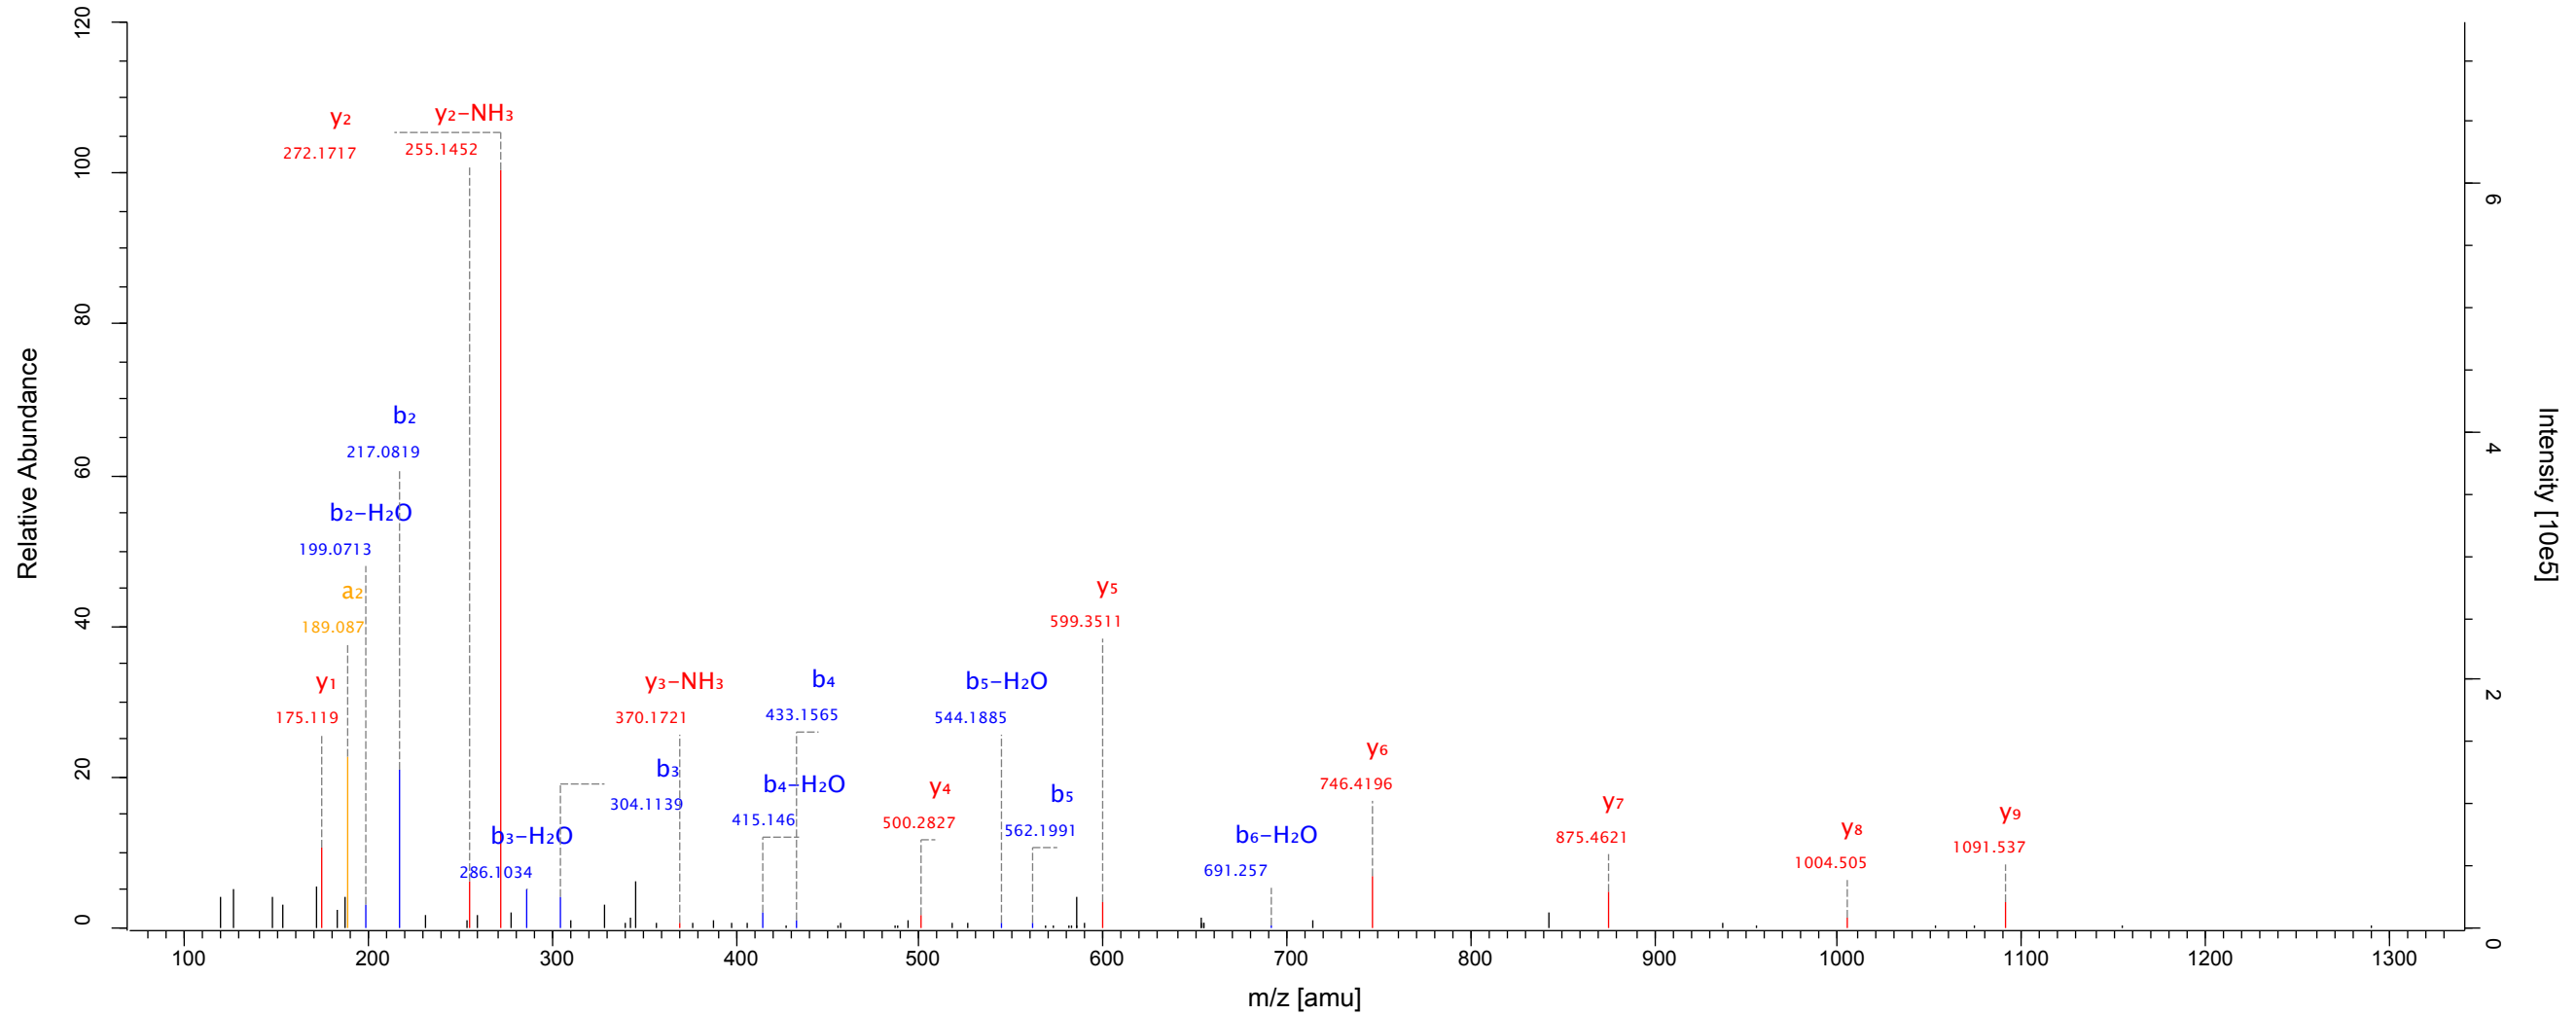



# peptide ID 69

Source: 20121106\_CO\_0340Gaje\_R02\_2  
Scannumber: 16832  
Protein: pep\_177; pep\_secretome\_483  
Peptide Score: 56.96  
Method: FTMS; HCD; 1

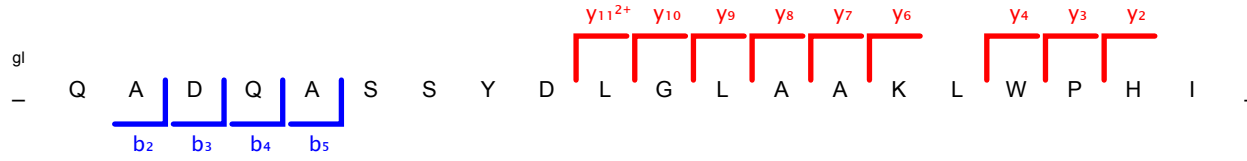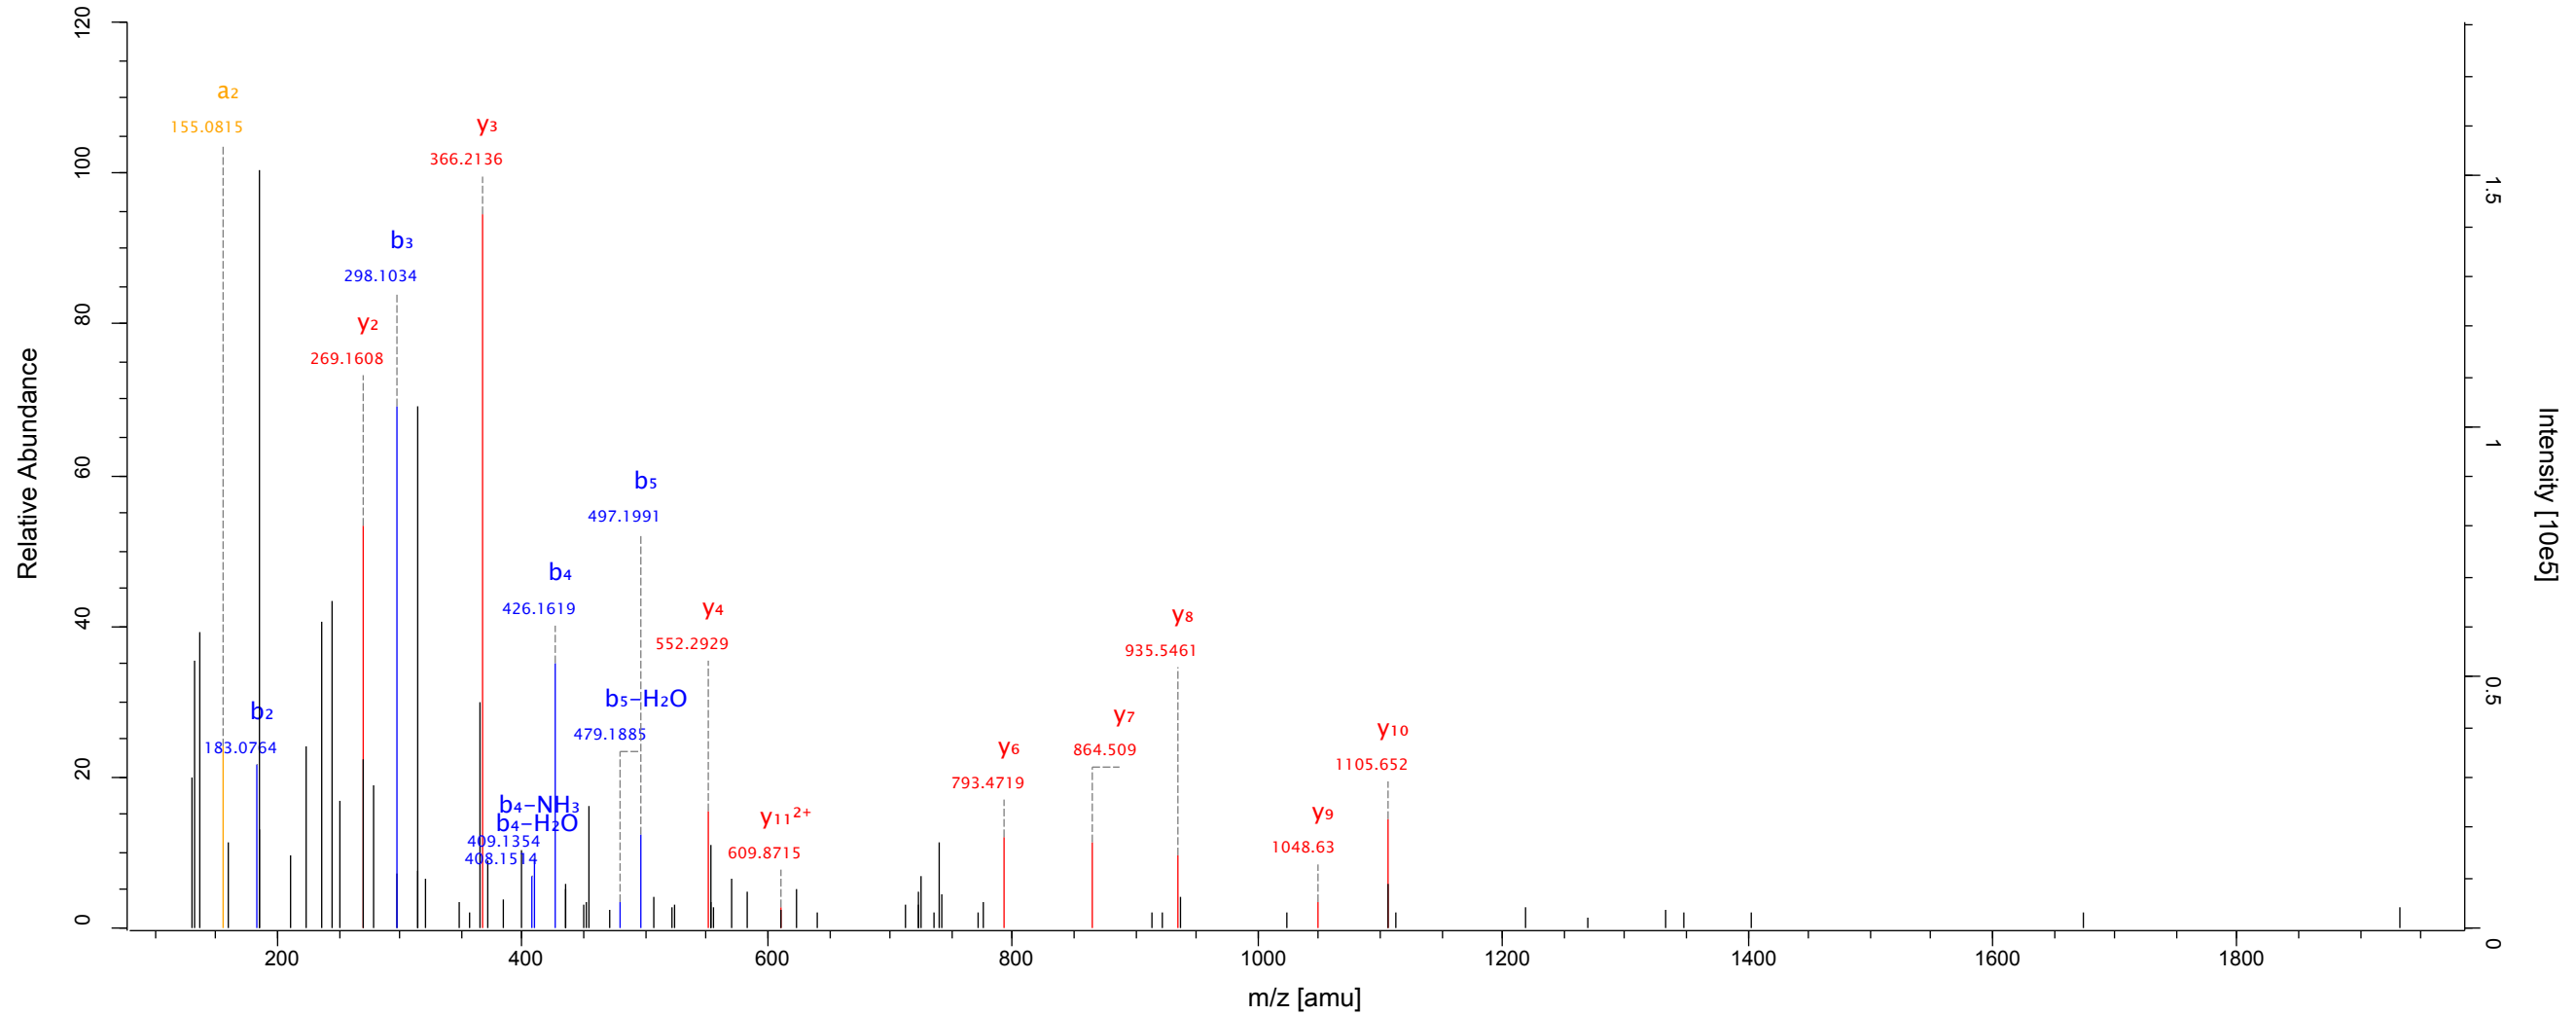

# peptide ID 70

Source: 20120816\_CO\_0340Gaje\_R02  
Scannumber: 6558  
Protein: pep\_secretome\_1211  
Peptide Score: 167.24  
Method: FTMS; HCD; 1

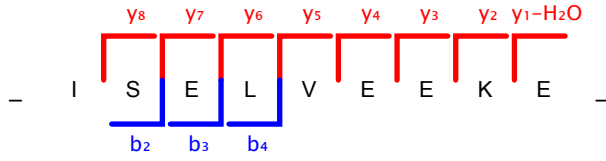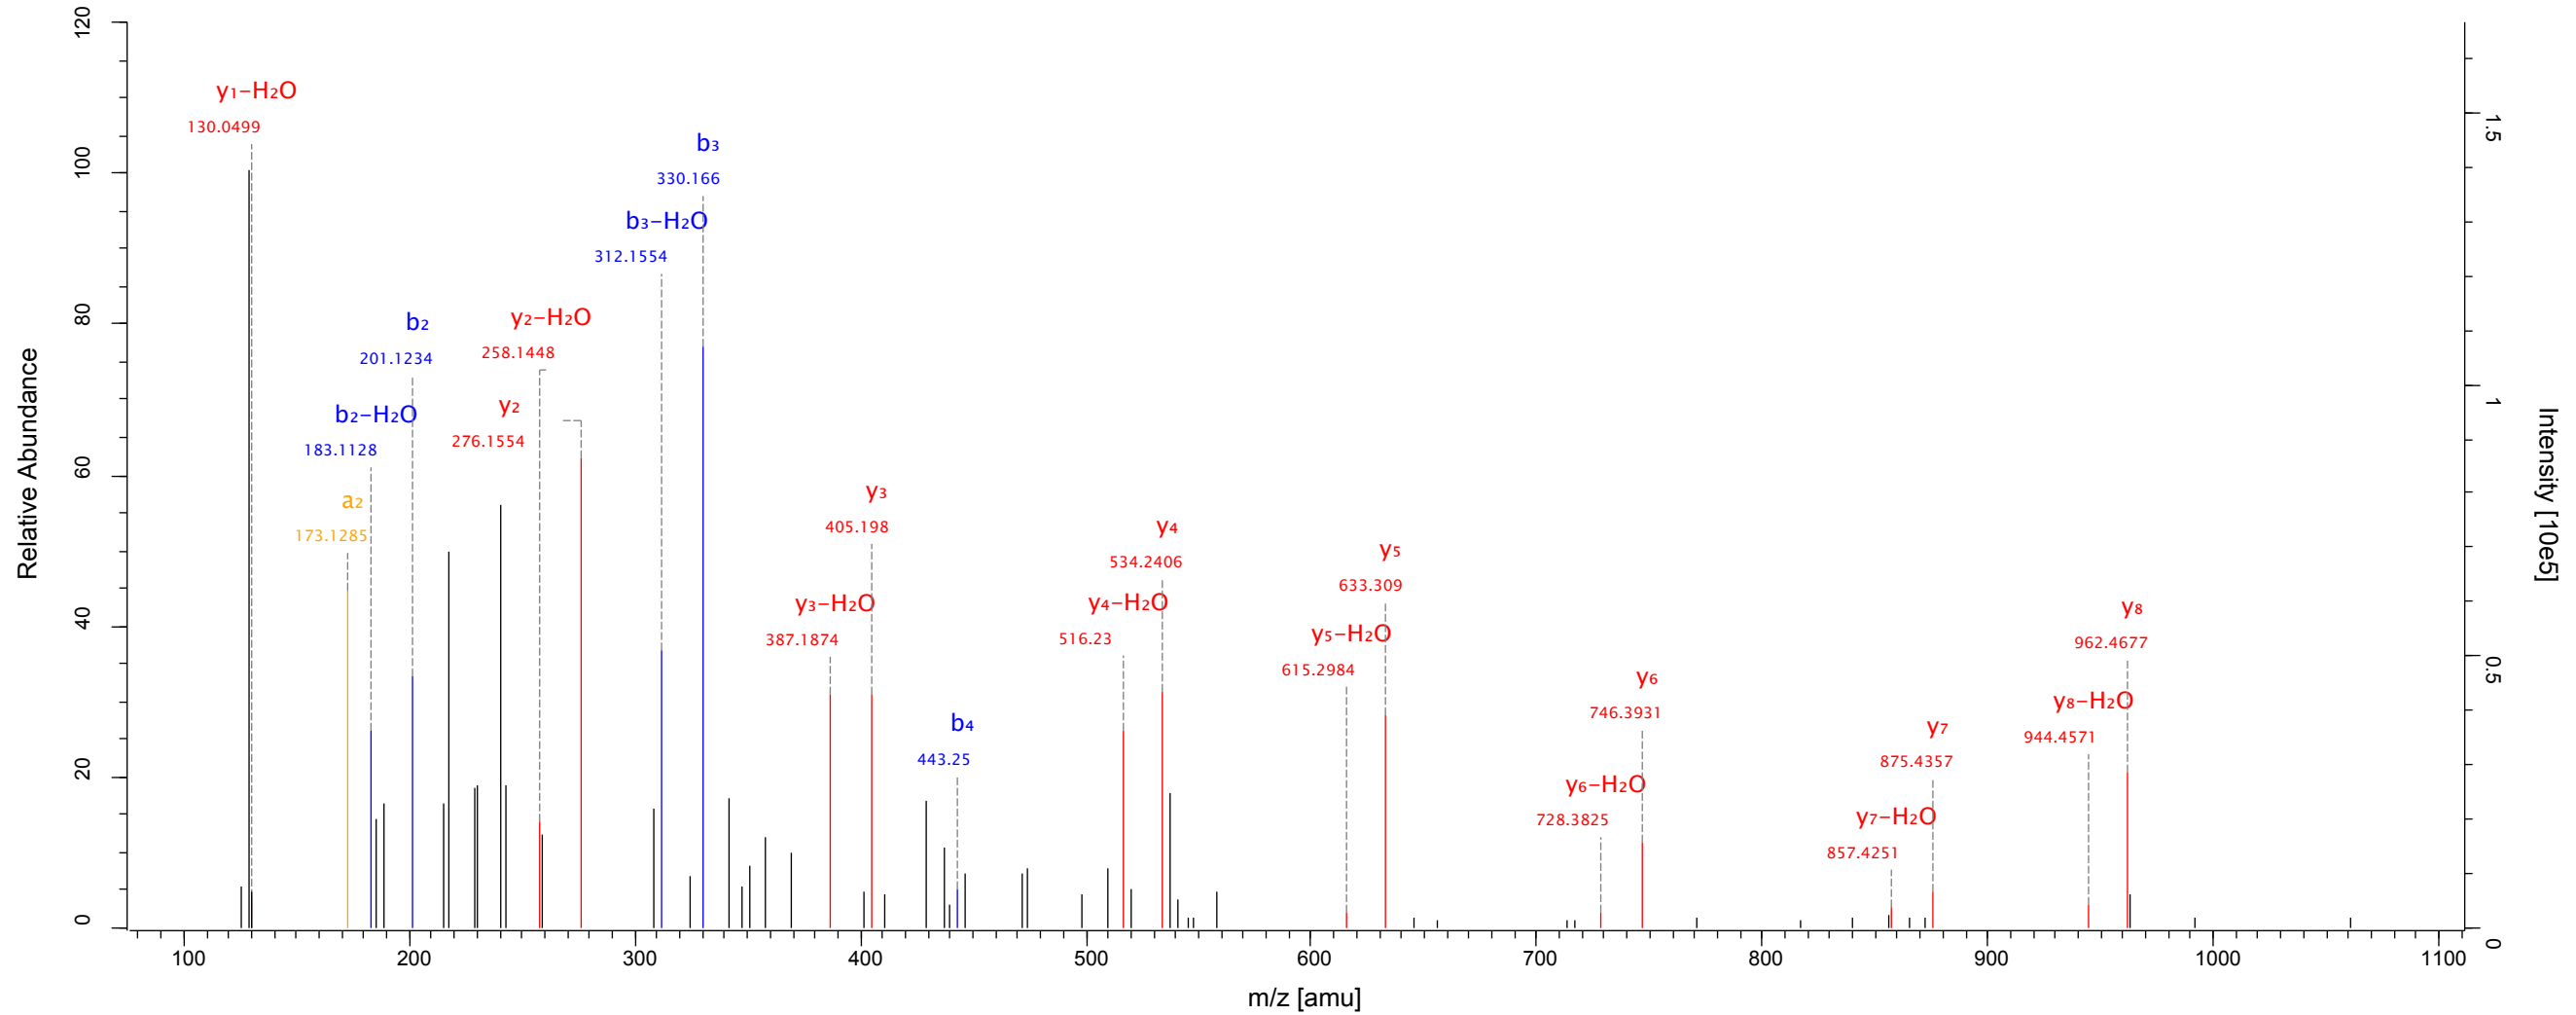

# peptide ID 71

Source: 20121106\_CO\_0340Gaje\_R02\_2  
Scannumber: 7135  
Protein: pep\_secretome\_1213; pep\_secretome\_26648  
Peptide Score: 108.98  
Method: FTMS; HCD; 1

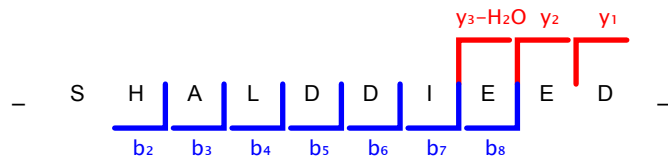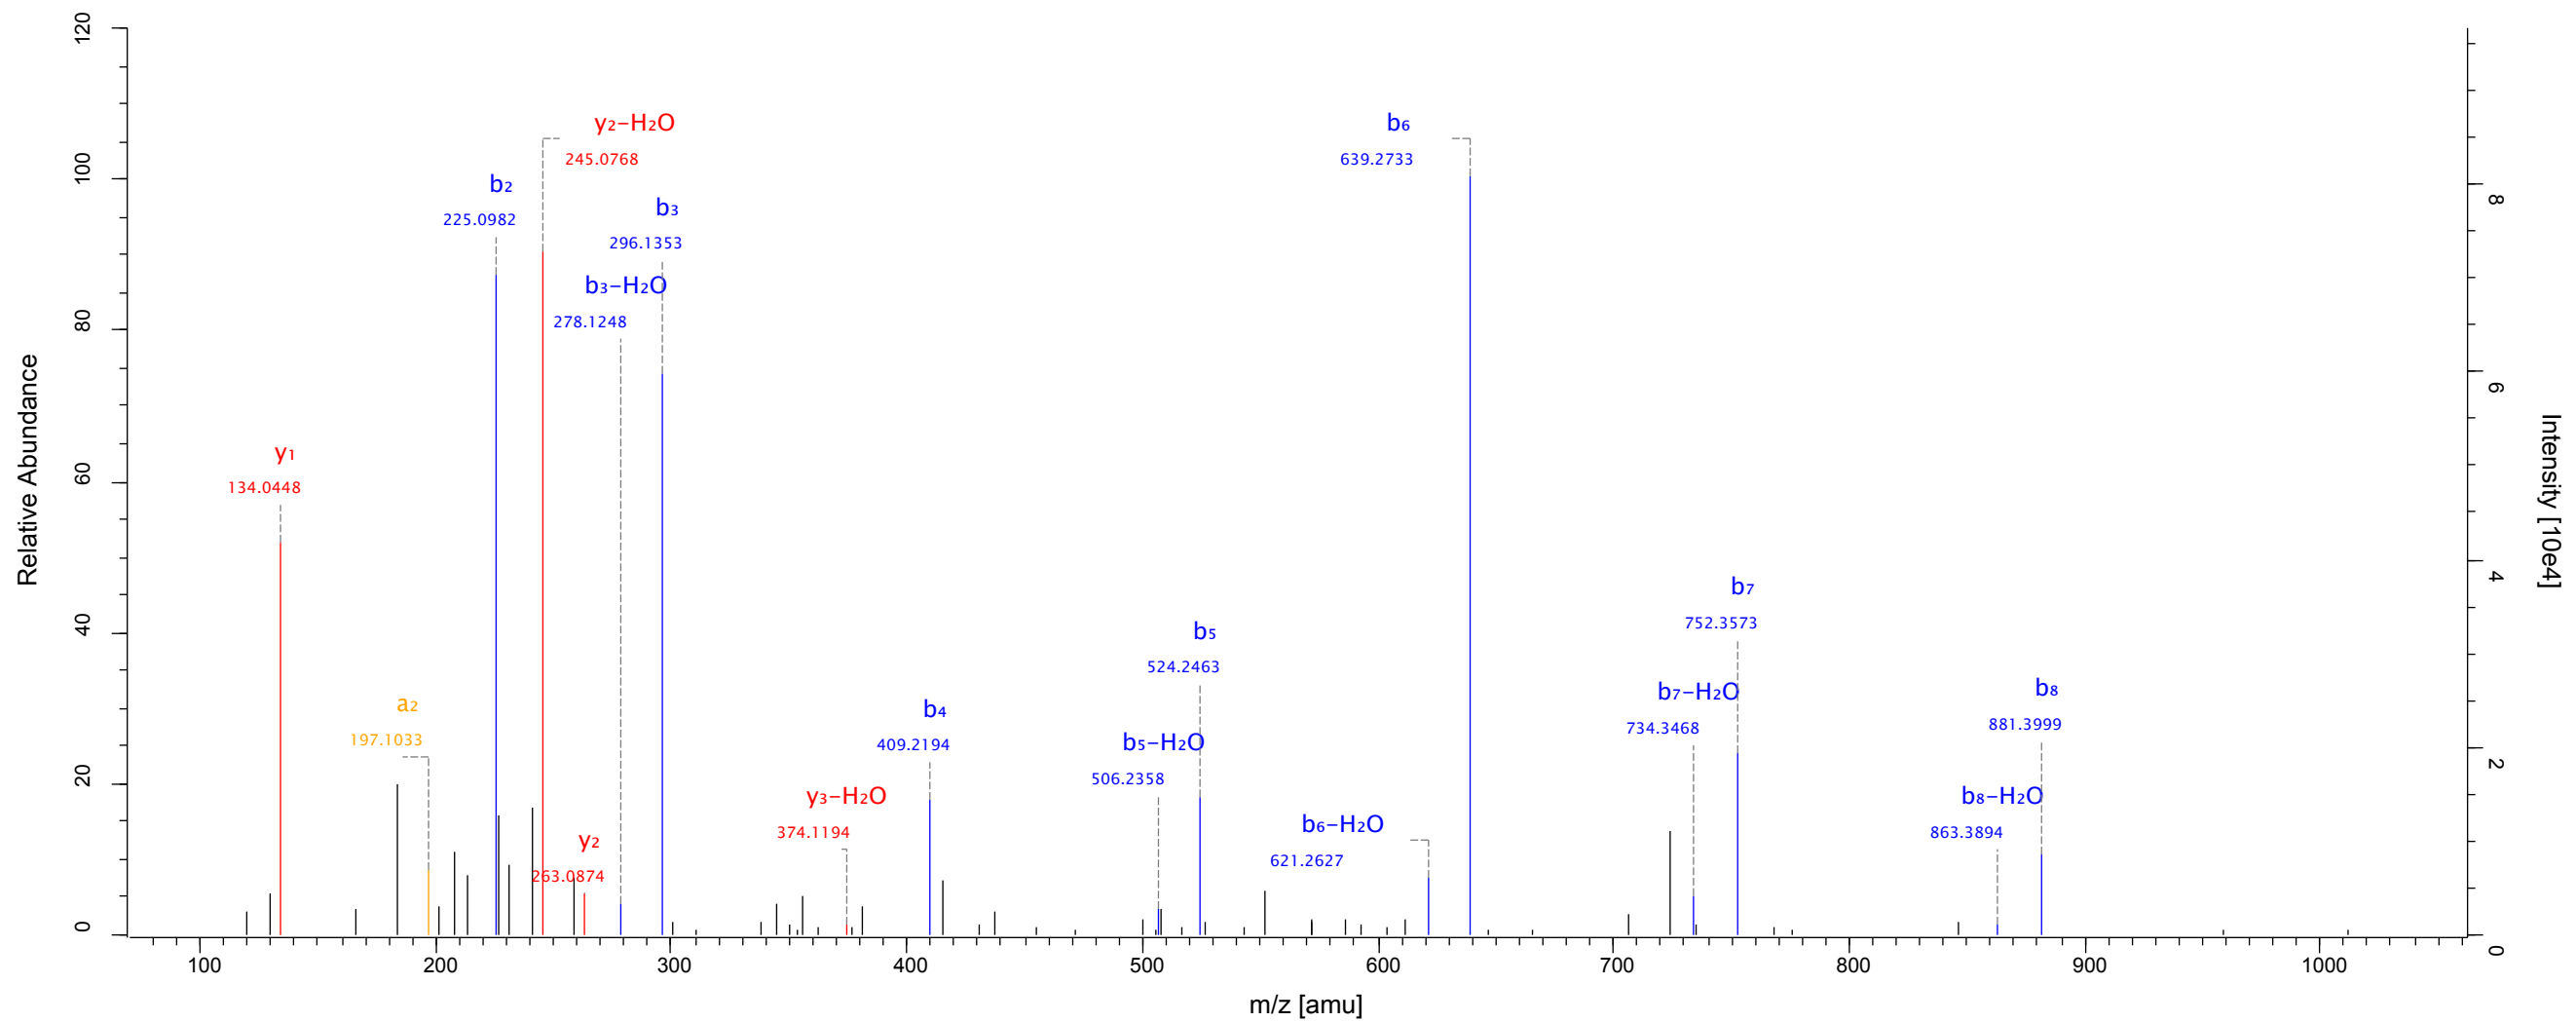

# peptide ID 72

Source: 20120816\_CO\_0340Gaje\_R02  
Scannumber: 16767  
Protein: pep\_secretome\_1219  
Peptide Score: 66.96  
Method: FTMS; HCD; 1

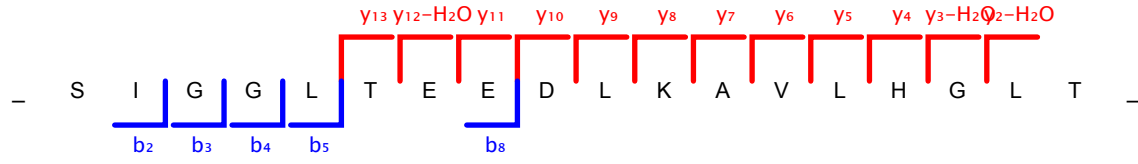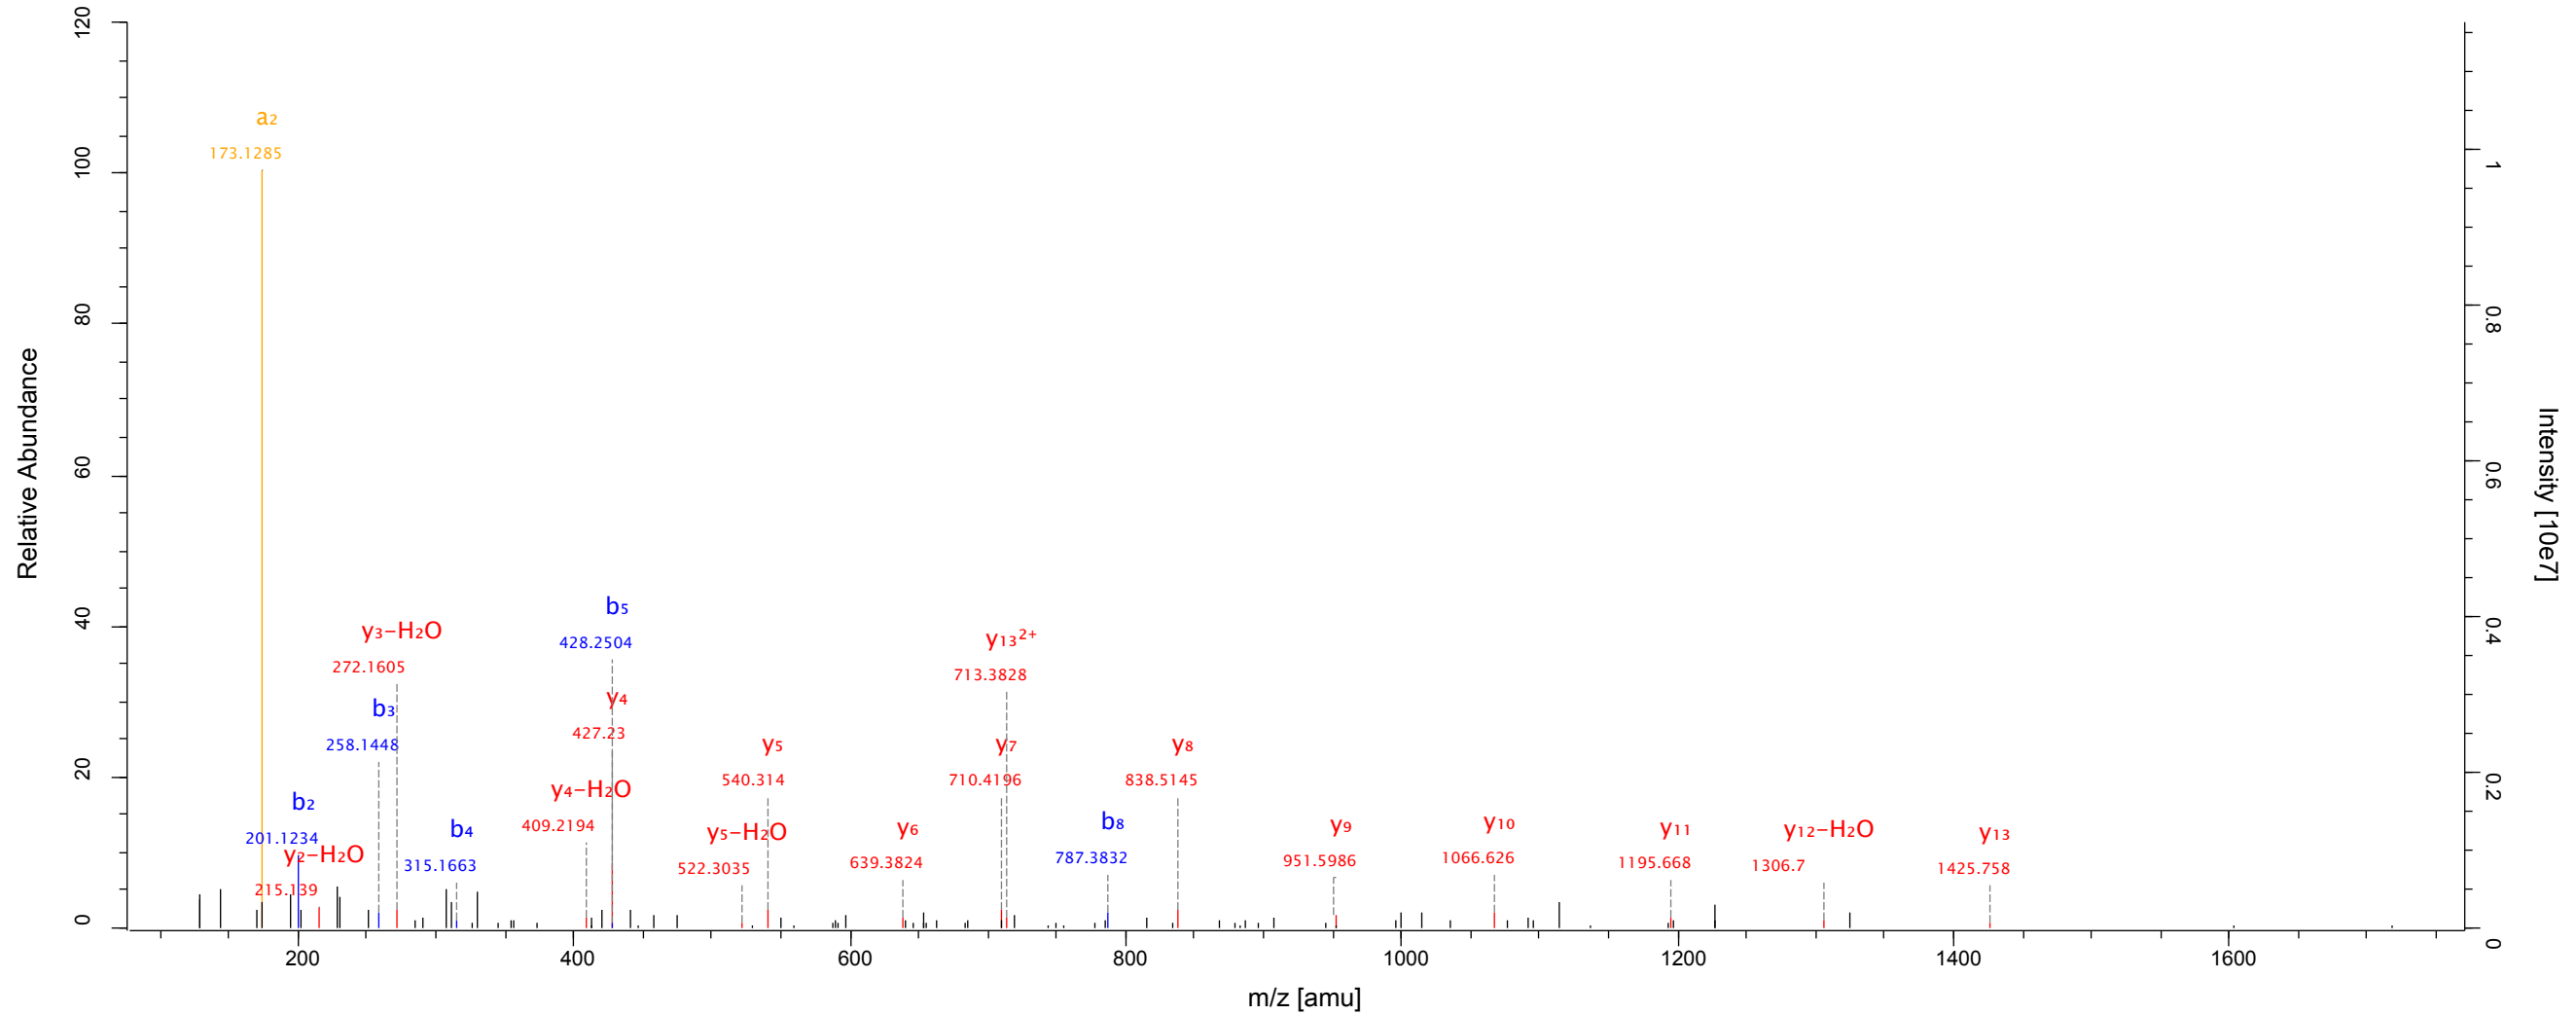

# peptide ID 73

Source: 20121106\_CO\_0340Gaje\_R02\_2  
Scannumber: 15246  
Protein: pep\_66; pep\_secretome\_126; pep\_secretome\_19643  
Peptide Score: 34.5  
Method: FTMS; HCD; 1

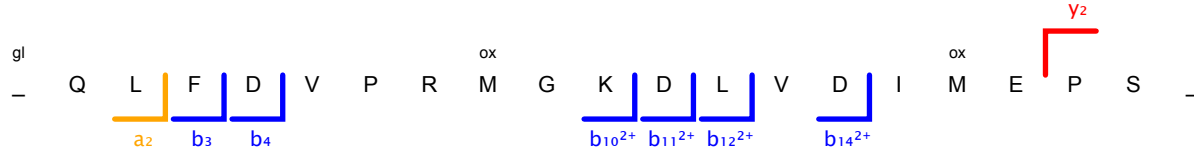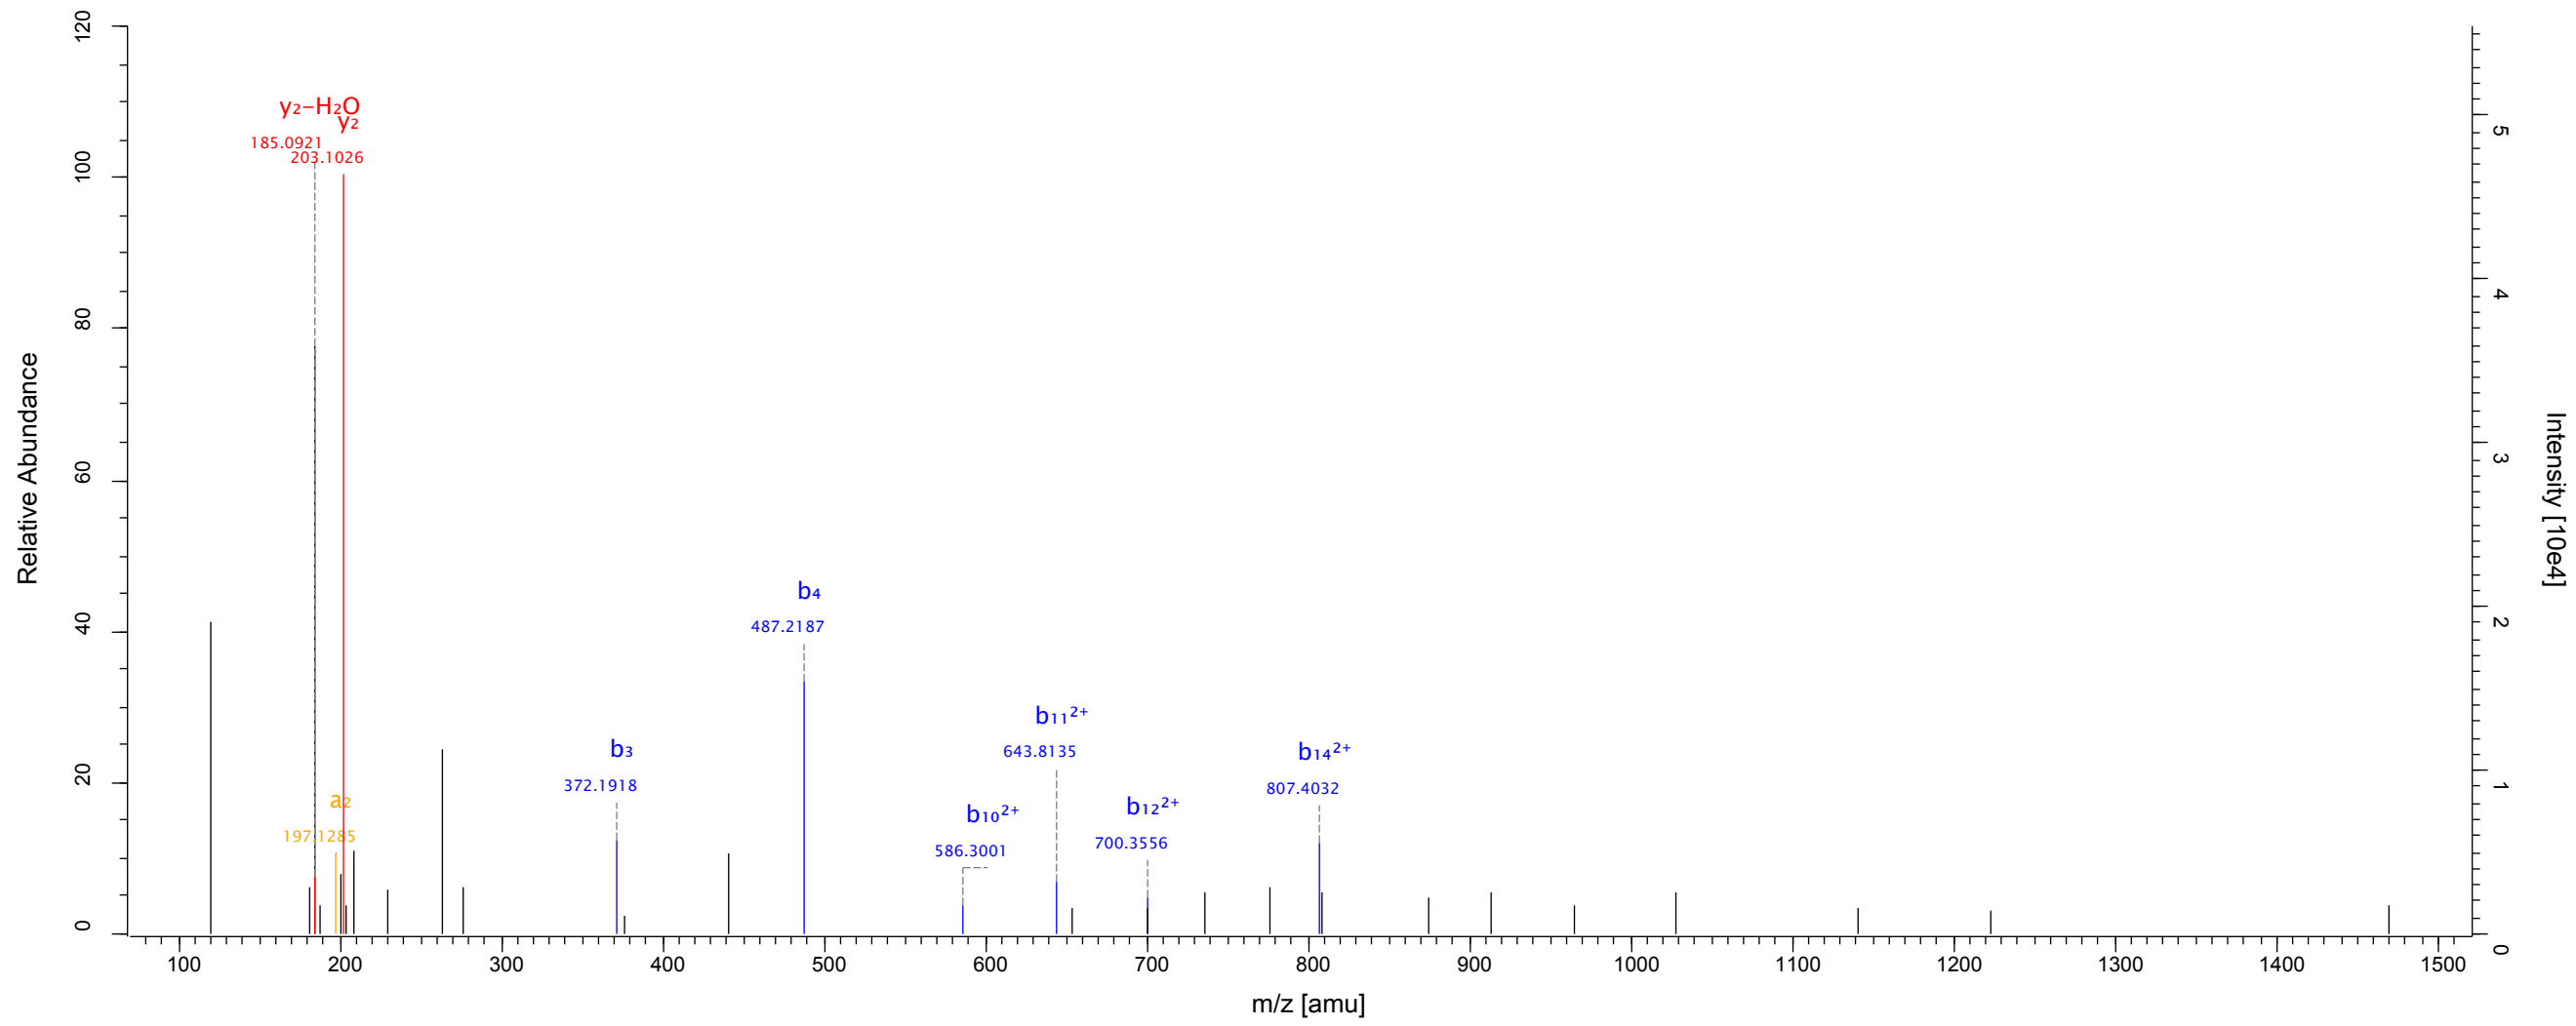

# peptide ID 74

Source: 20120816\_CO\_0340Gaje\_R02  
Scannumber: 10975  
Protein: orf\_18496; pep\_68; pep\_secretome\_128  
Peptide Score: 134.08  
Method: FTMS; HCD; 1

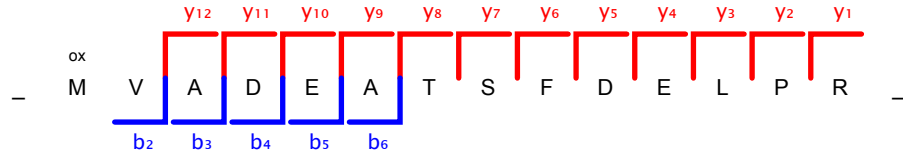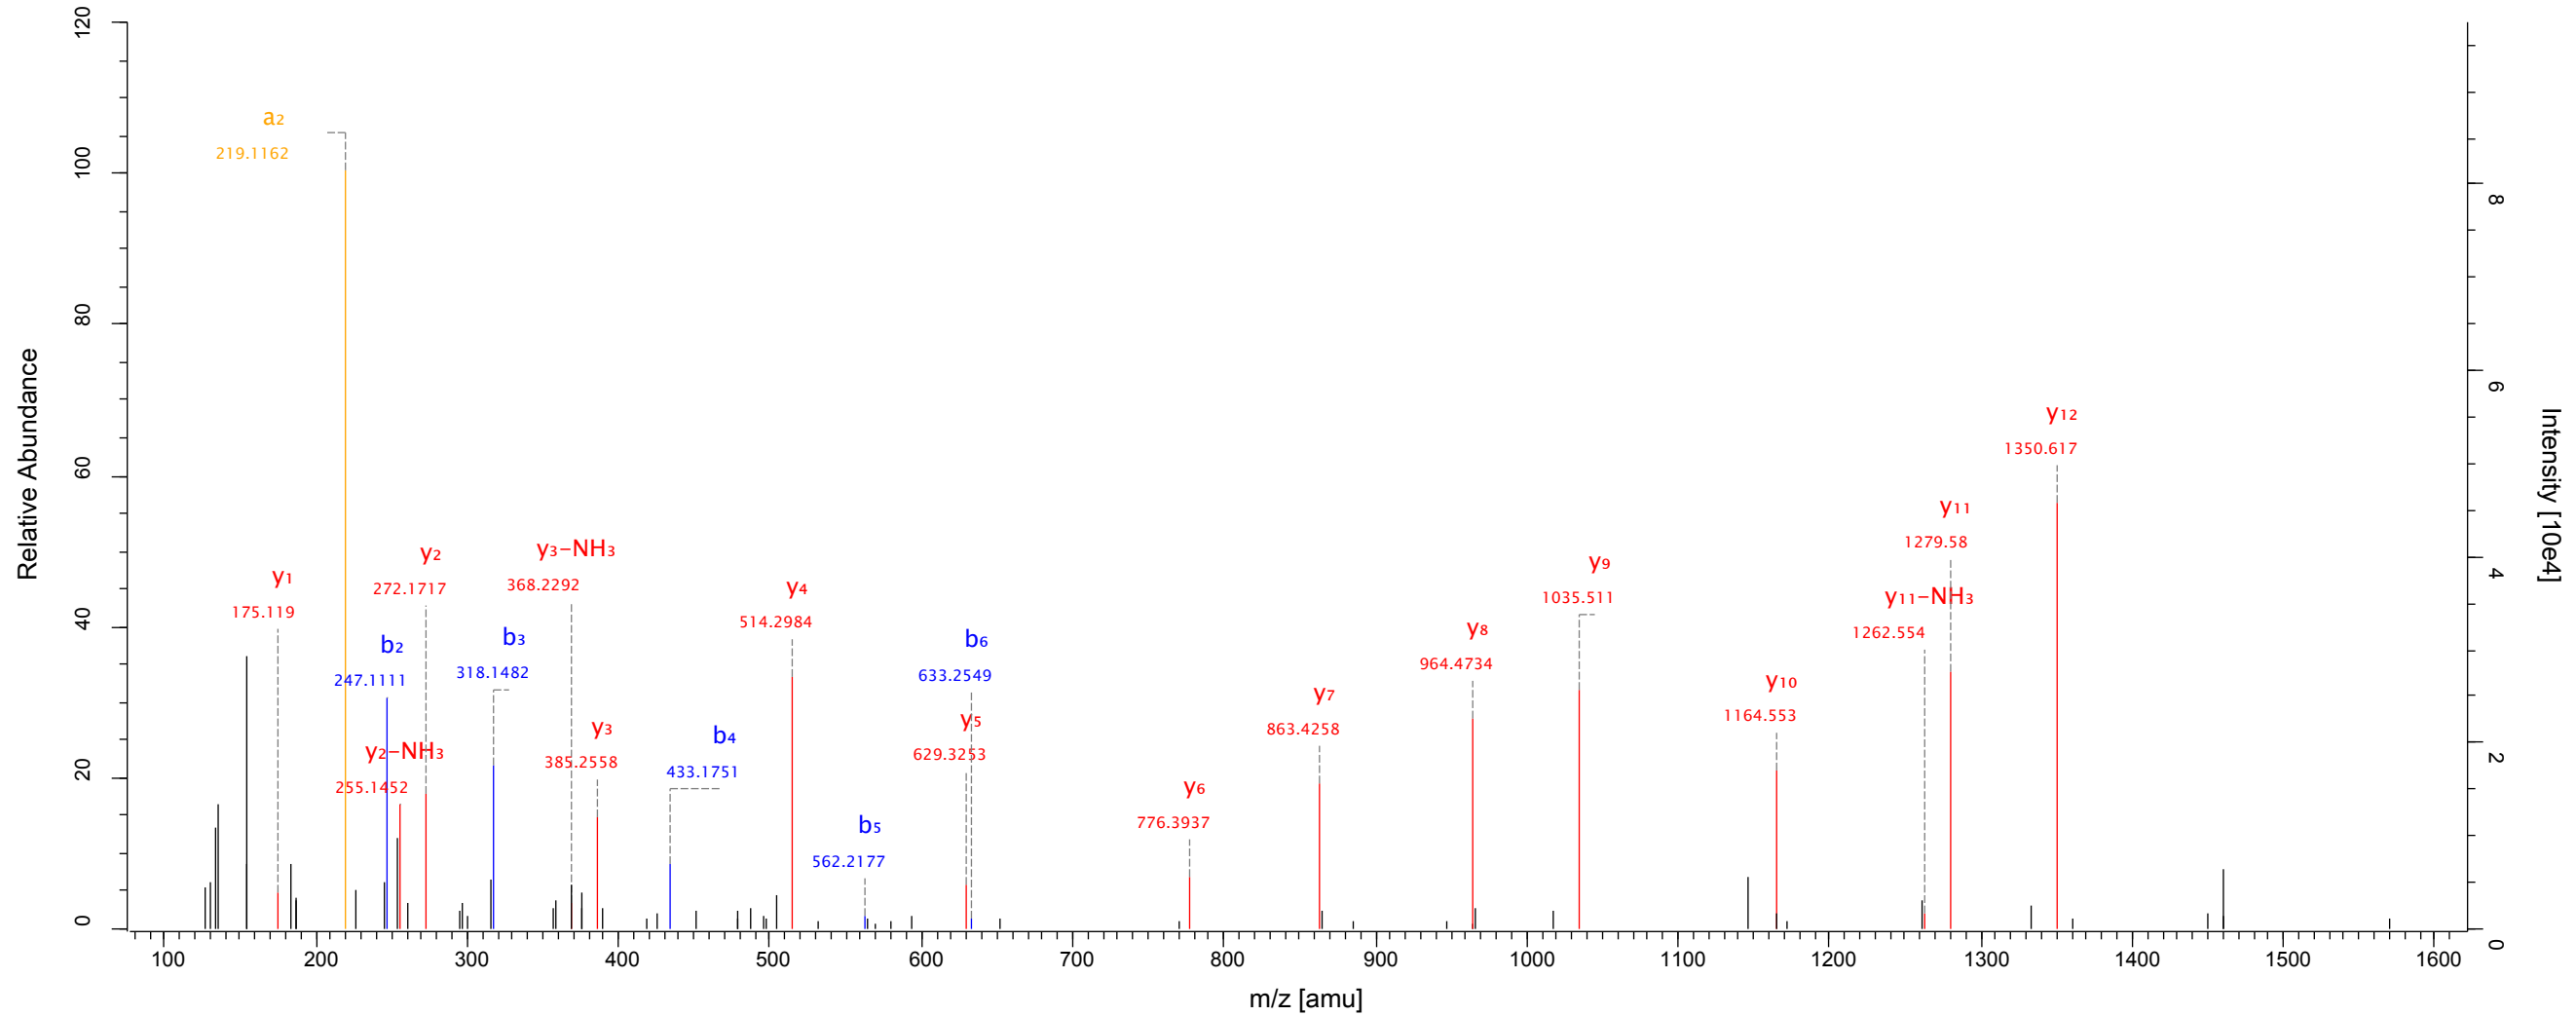

# peptide ID 75

Source: 20120816\_CO\_0340Gaje\_R02  
Scannumber: 7055  
Protein: orf\_18496; pep\_68; pep\_secretome\_128  
Peptide Score: 109.84  
Method: FTMS; HCD; 1

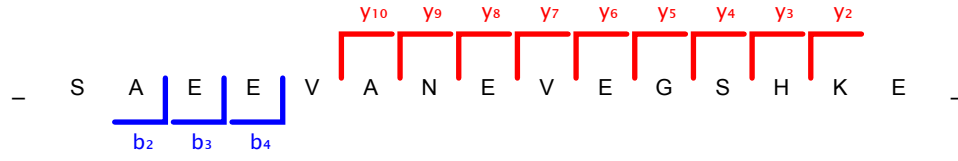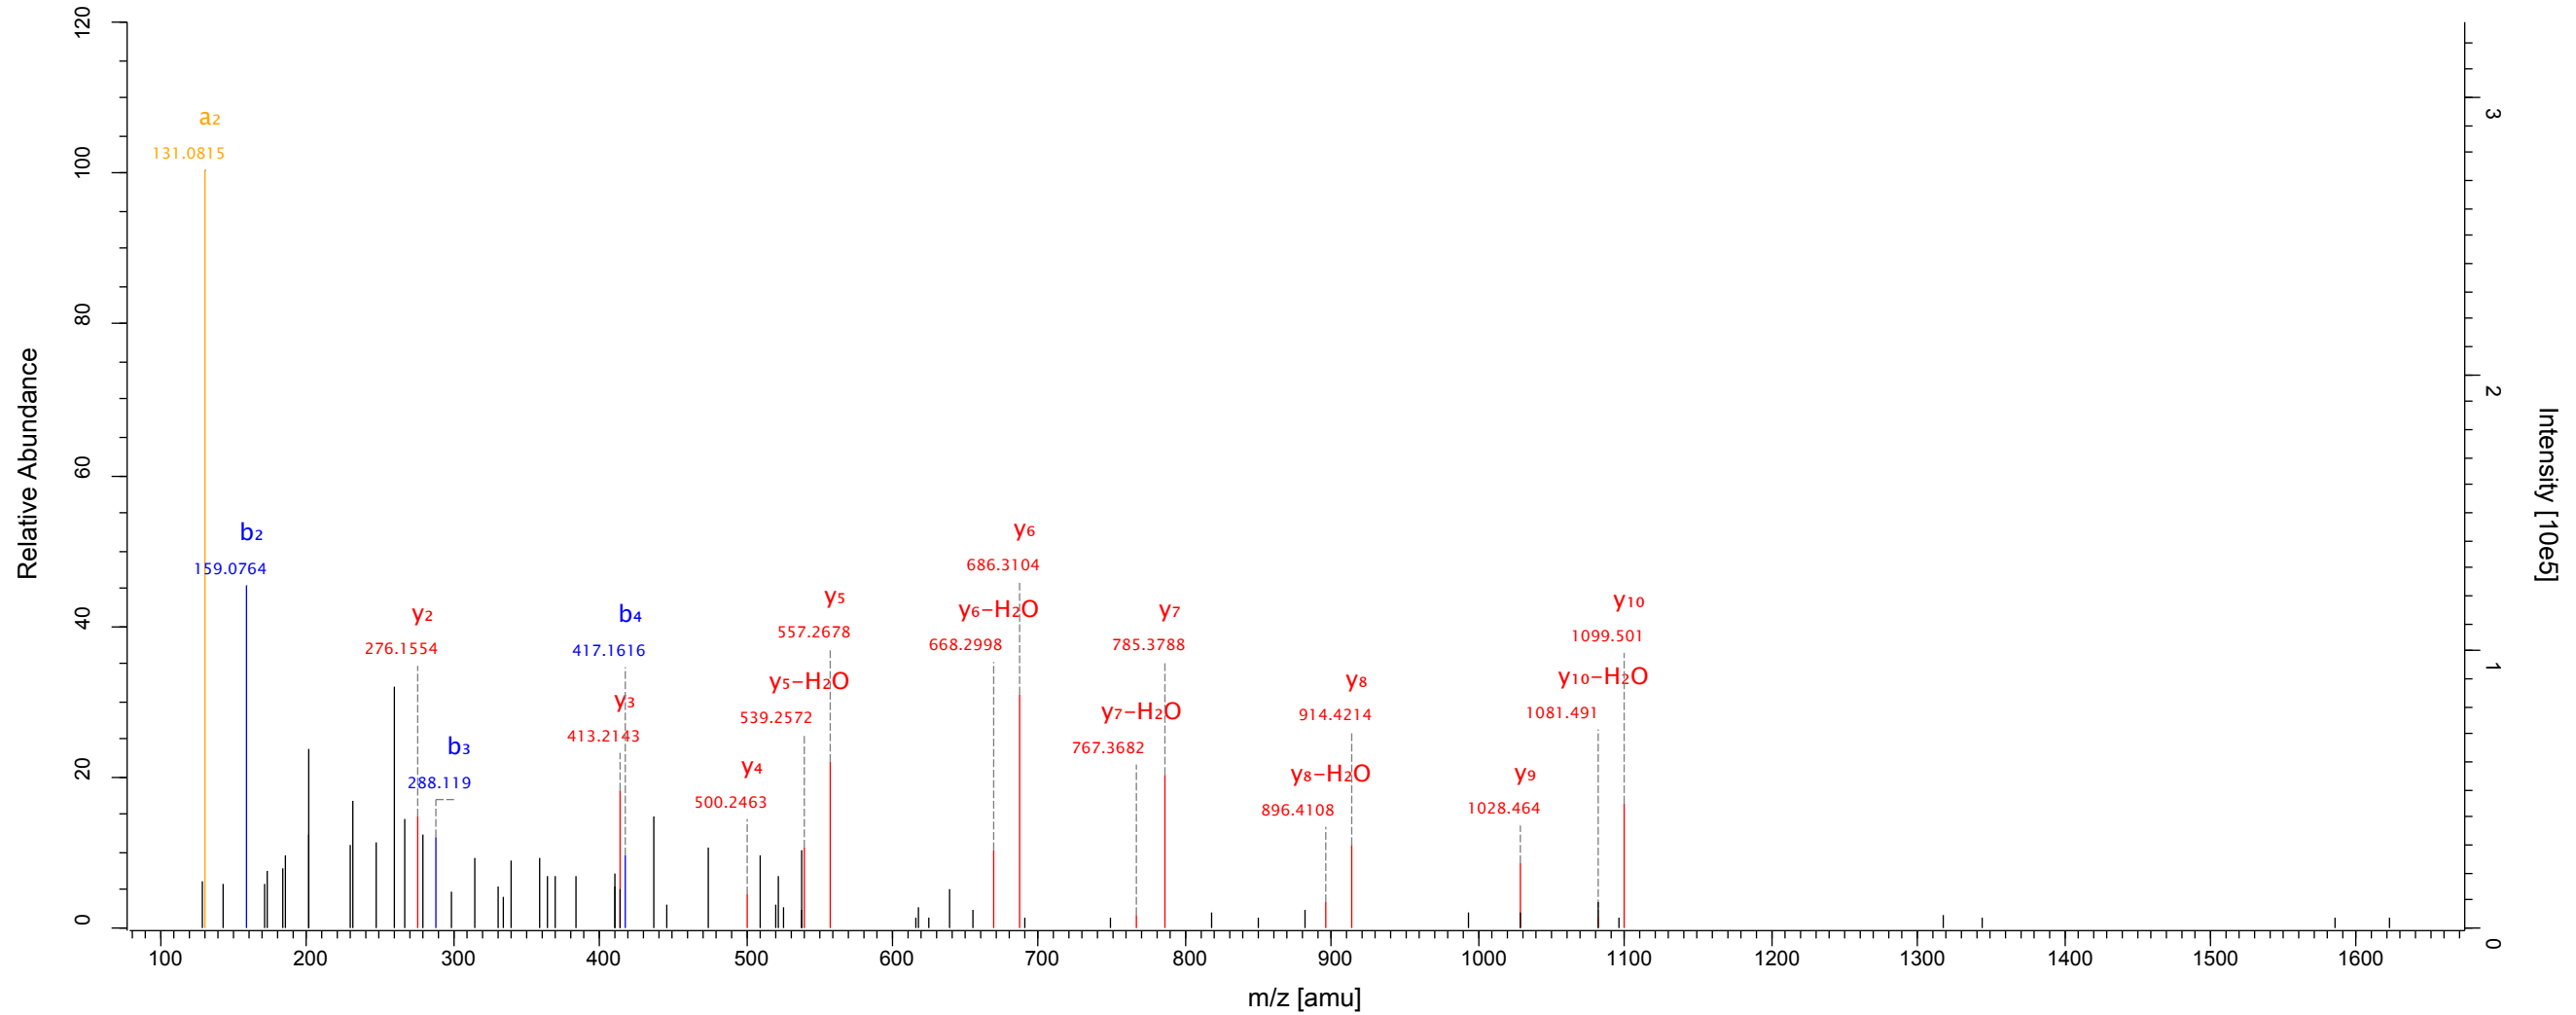

# peptide ID 76

Source: 20120816\_CO\_0340Gaje\_R02  
Scannumber: 7008  
Protein: pep\_secretome\_22782  
Peptide Score: 123.63  
Method: FTMS; HCD; 1

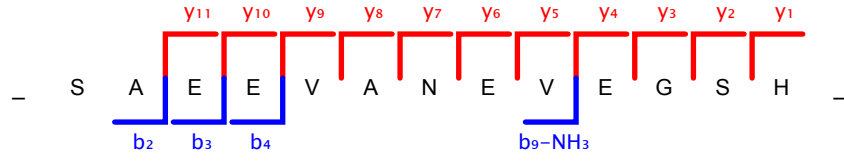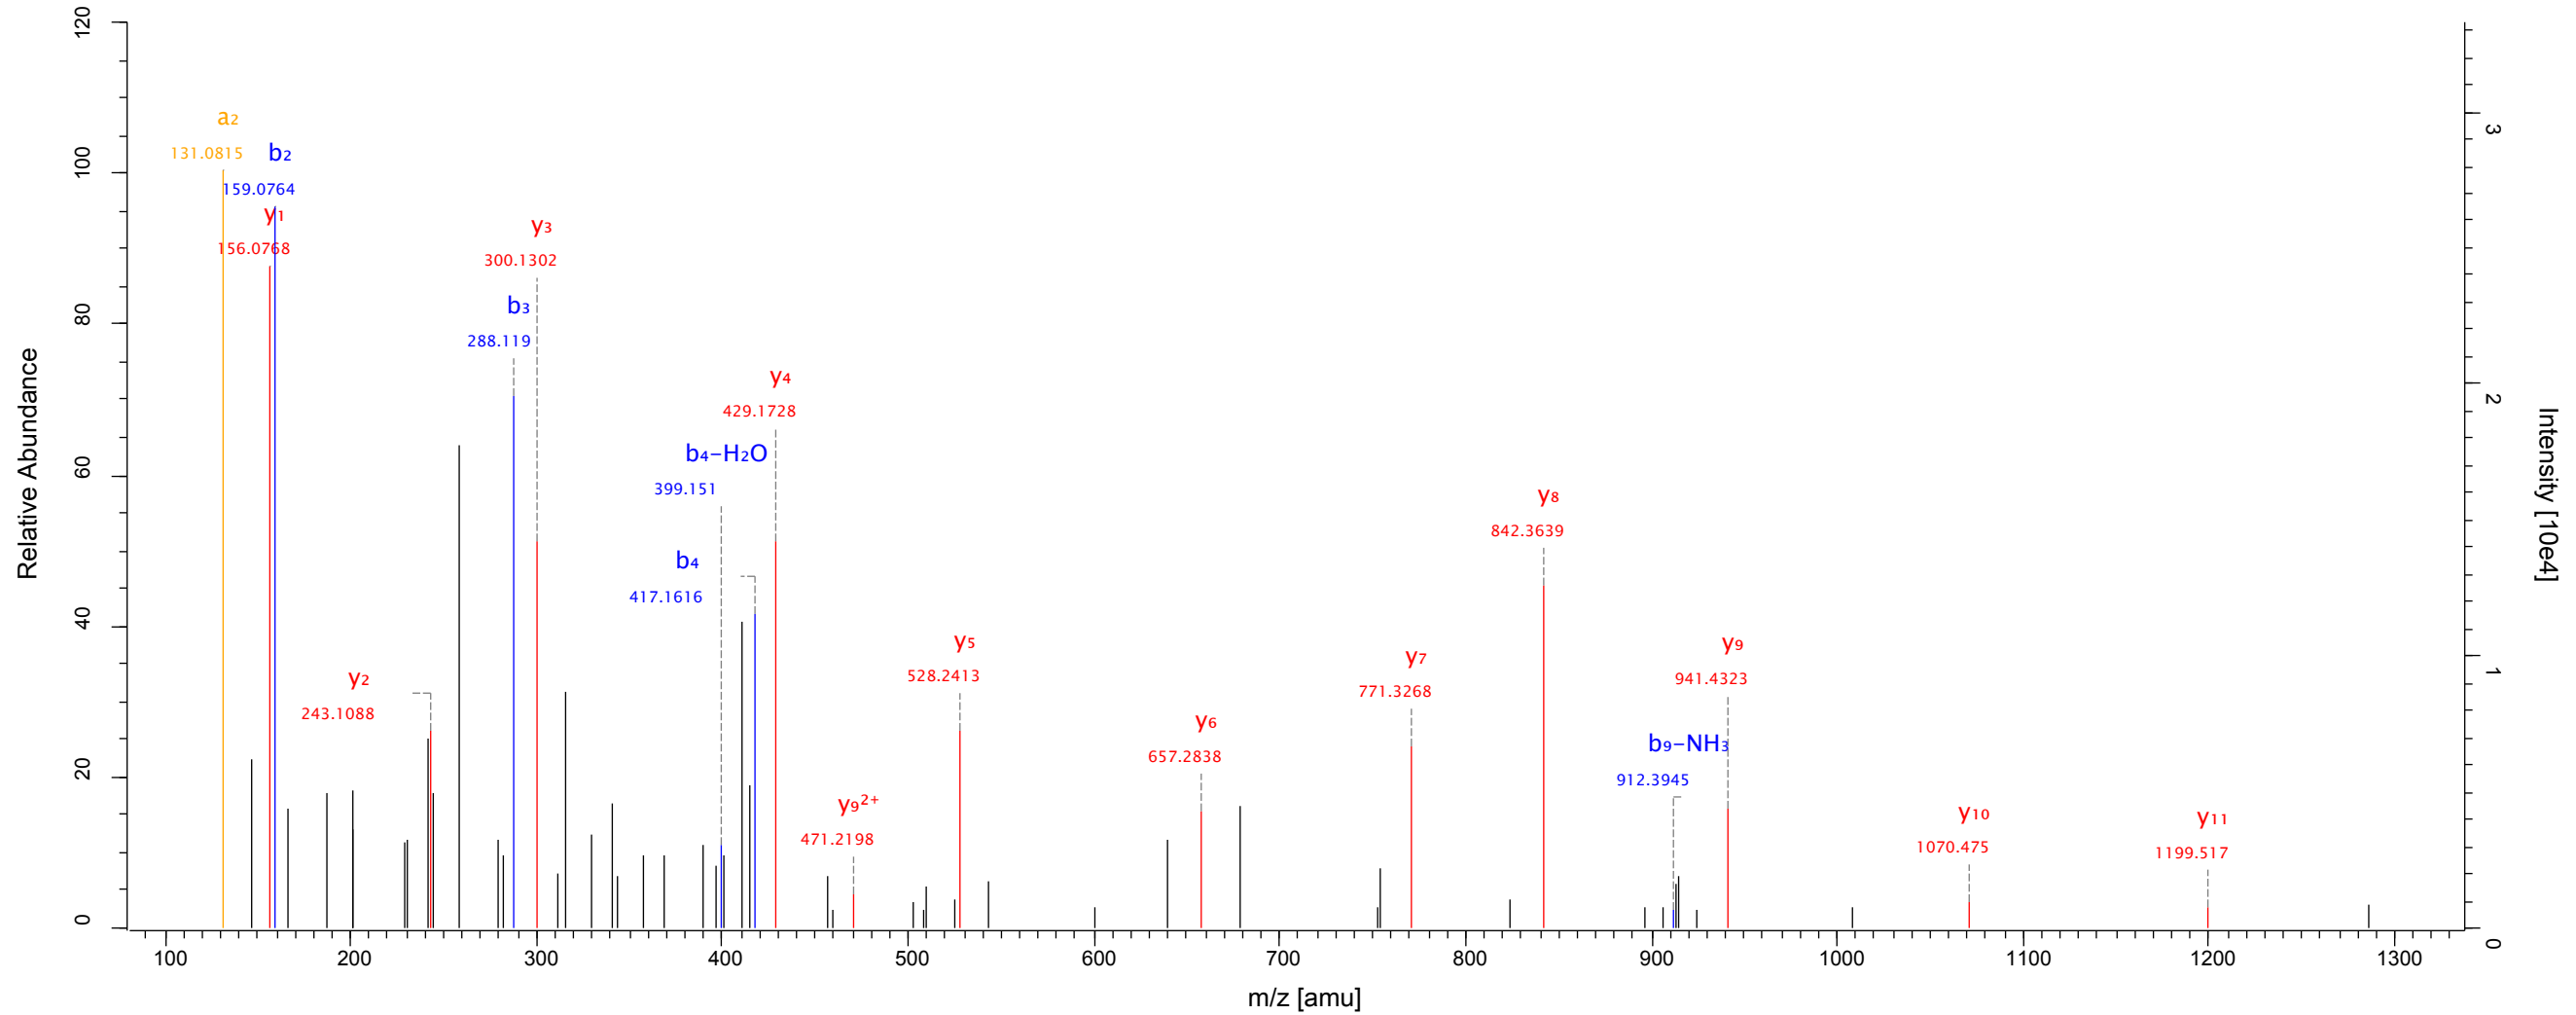



# peptide ID 77

Source: 20121106\_CO\_0340Gaje\_R02\_2  
Scannumber: 5800  
Protein: pep\_71; pep\_secretome\_134; pep\_secretome\_131; pep\_secretome\_140  
Peptide Score: 69.44  
Method: FTMS; HCD; 1

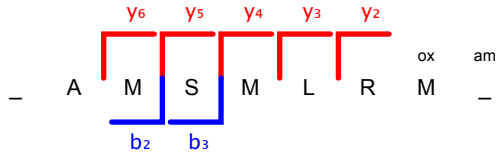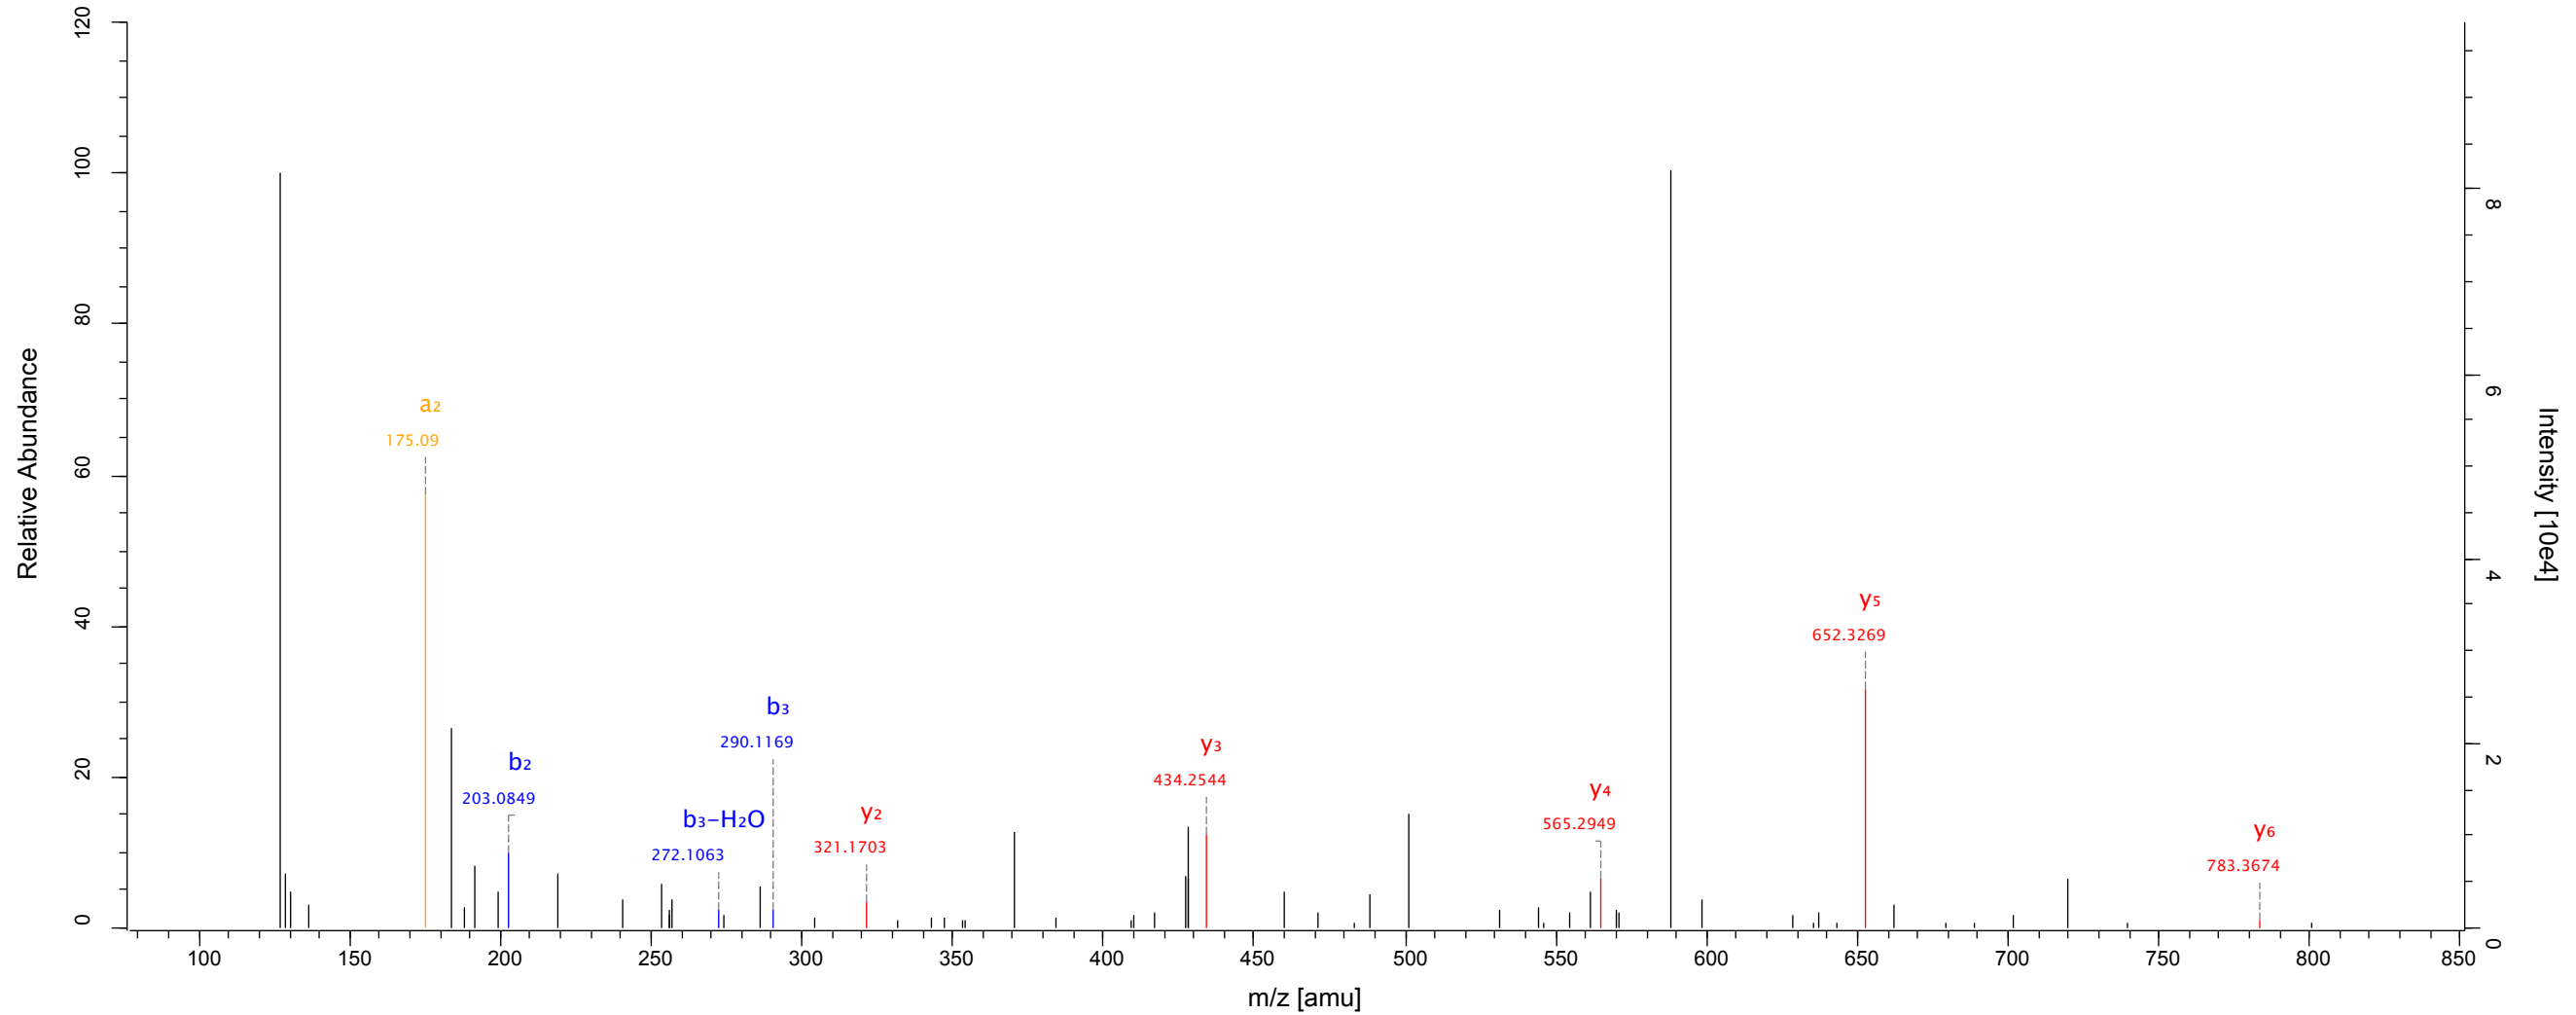

# peptide ID 78

Source: 20120816\_CO\_0340Gaje\_R02  
Scannumber: 7864  
Protein: pep\_secretome\_142; pep\_secretome\_144; pep\_secretome\_146  
Peptide Score: 63.58  
Method: FTMS; HCD; 1

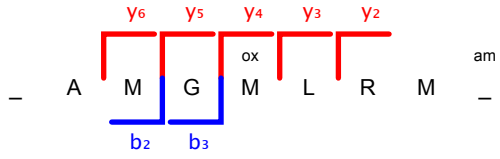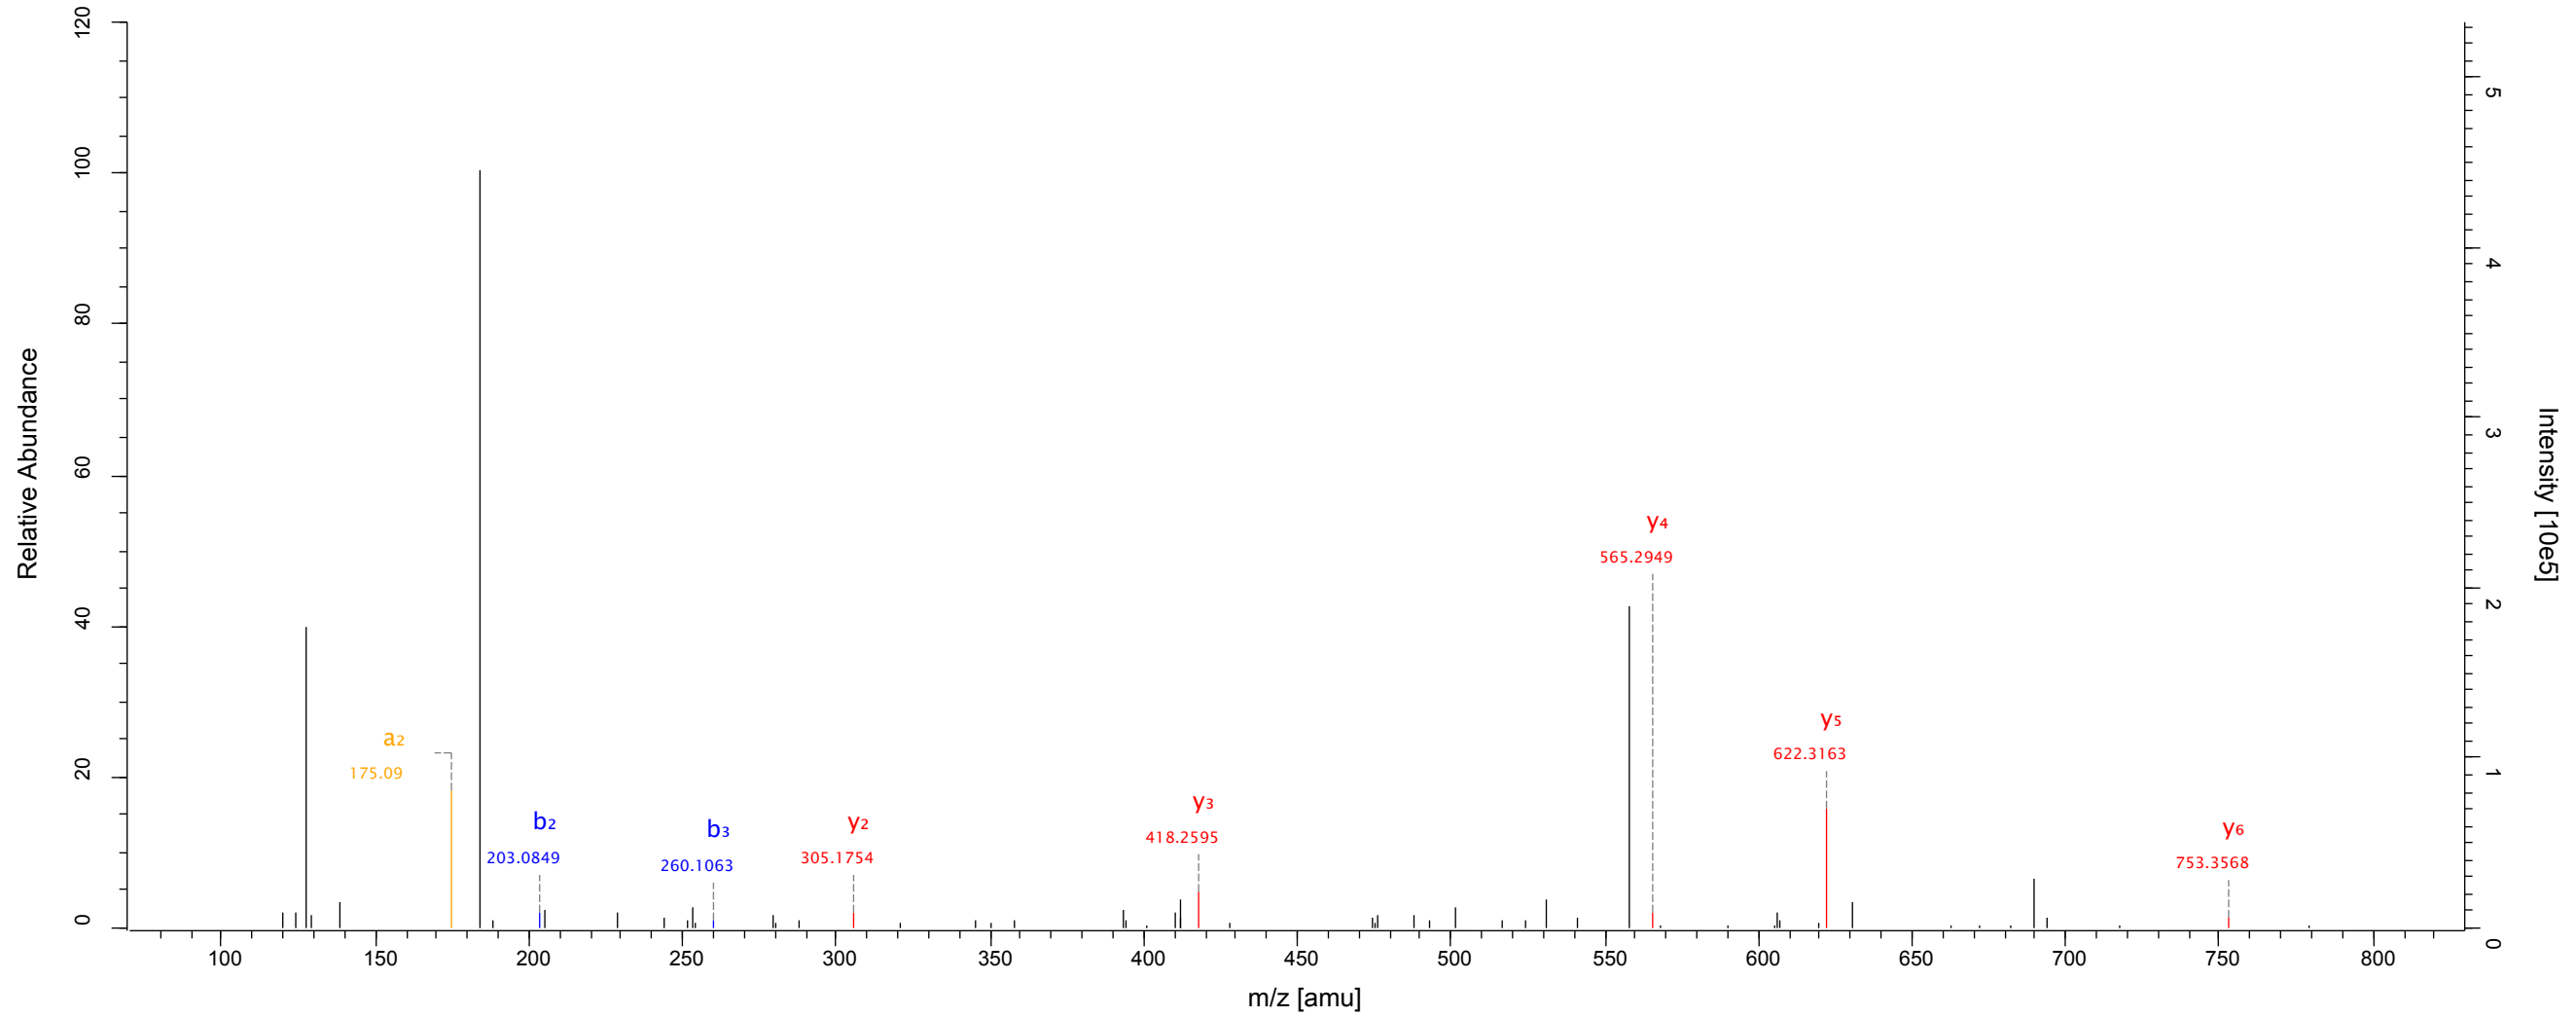

# peptide ID 79

Source: 20121106\_CO\_0340Gaje\_R02\_2  
Scannumber: 8024  
Protein: pep\_secretome\_133; pep\_secretome\_22803  
Peptide Score: 74.46  
Method: FTMS; HCD; 1

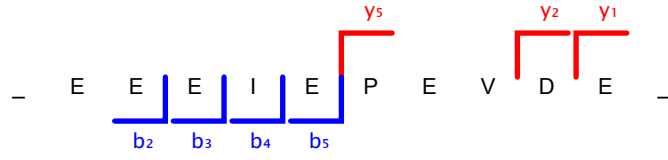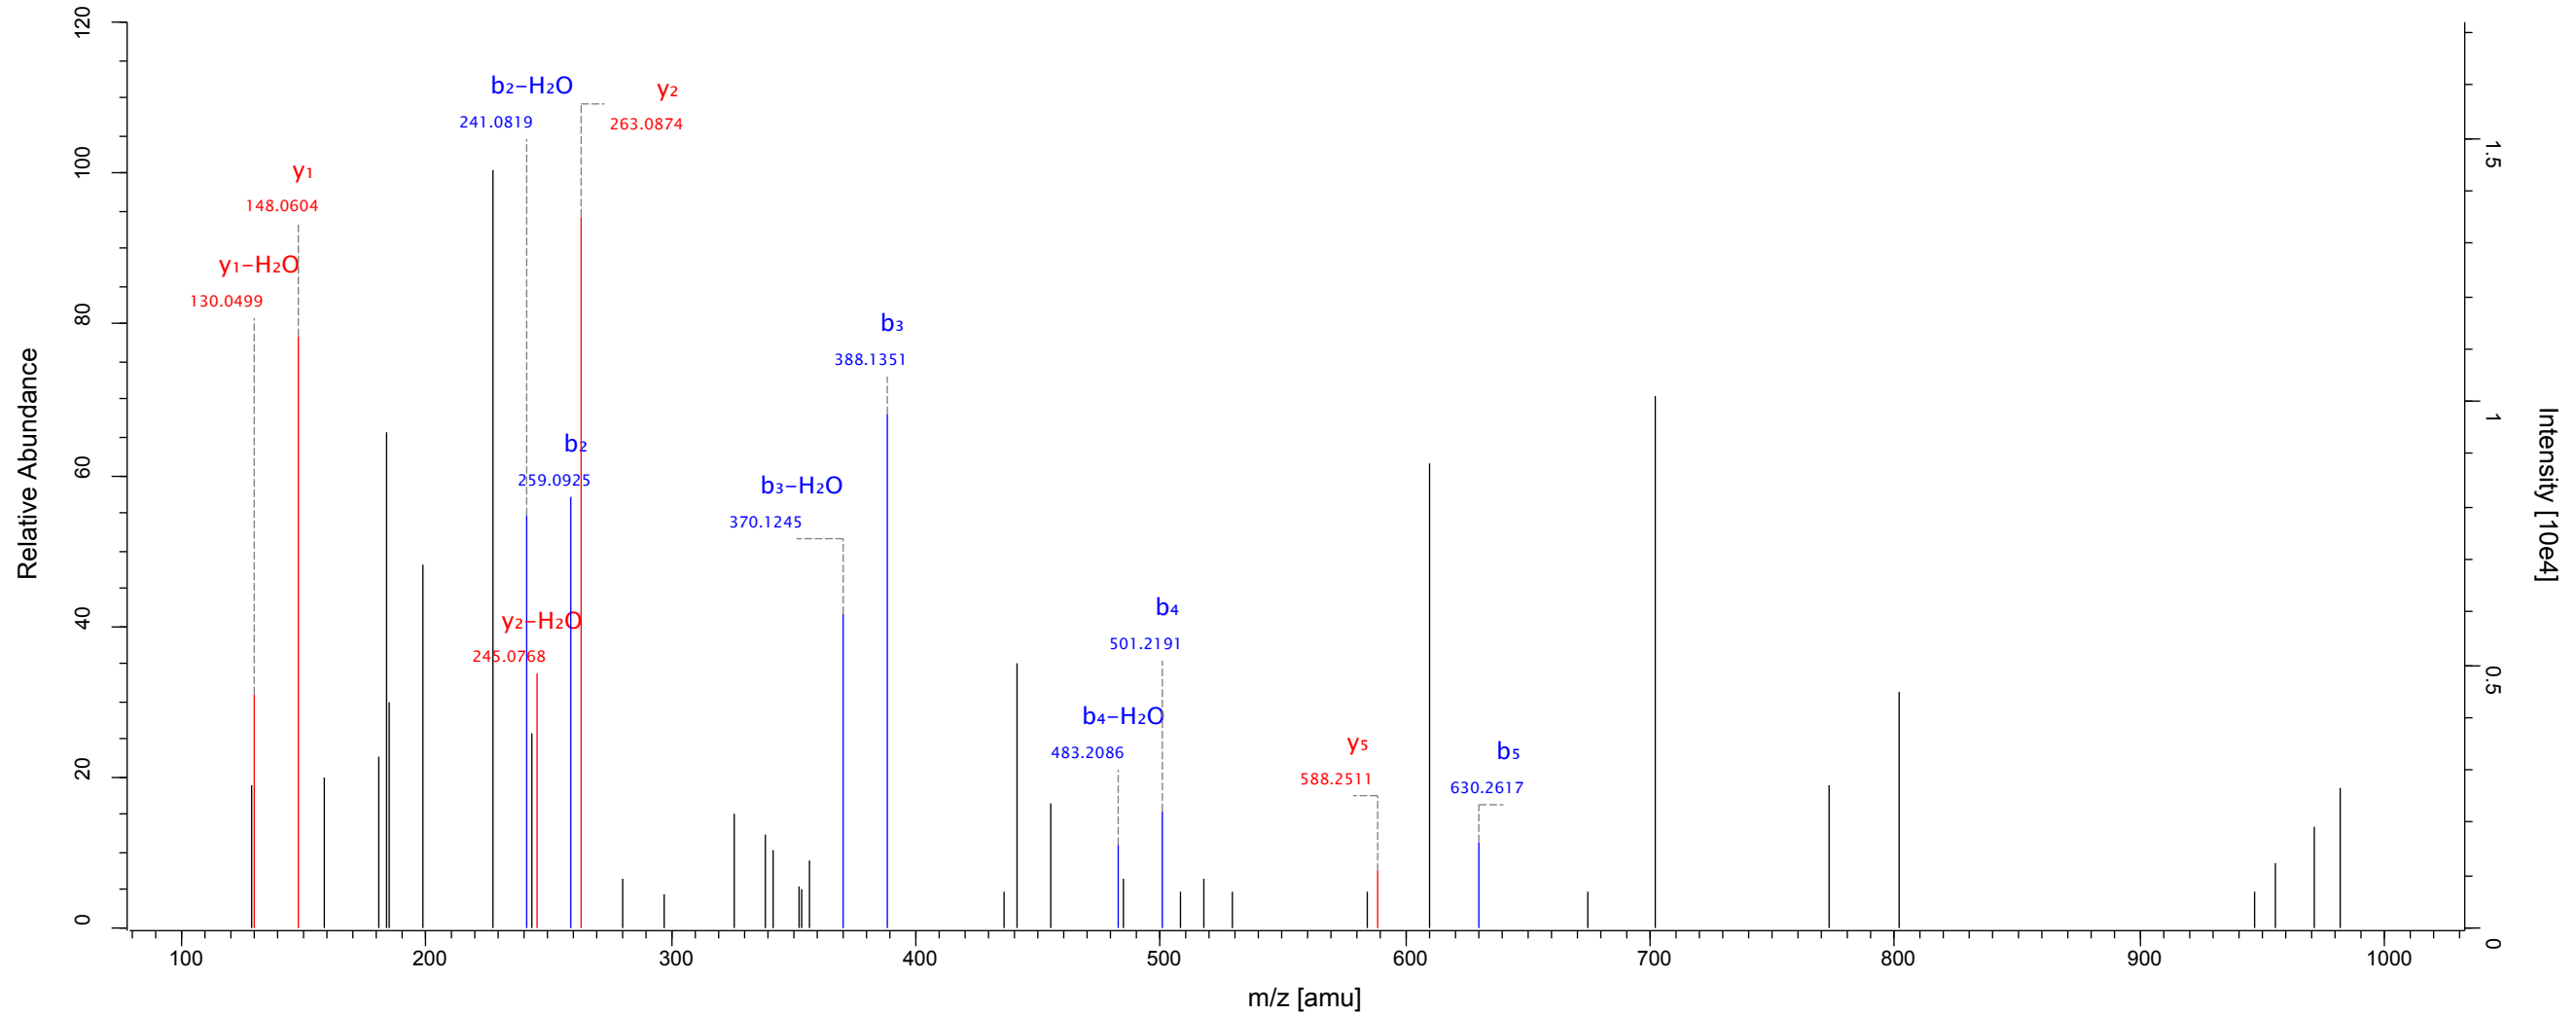

# peptide ID 80

Source: 20120515\_CO\_0340Gaje\_R01  
Scannumber: 14241  
Protein: pep\_226; pep\_secretome\_623  
Peptide Score: 108.71  
Method: FTMS; HCD; 1

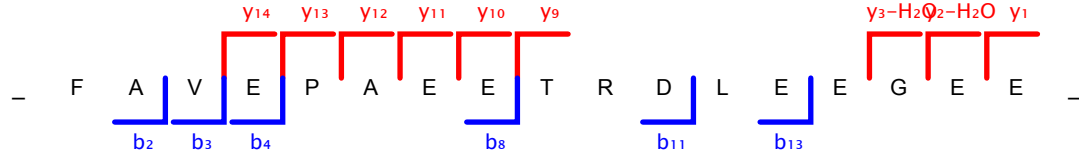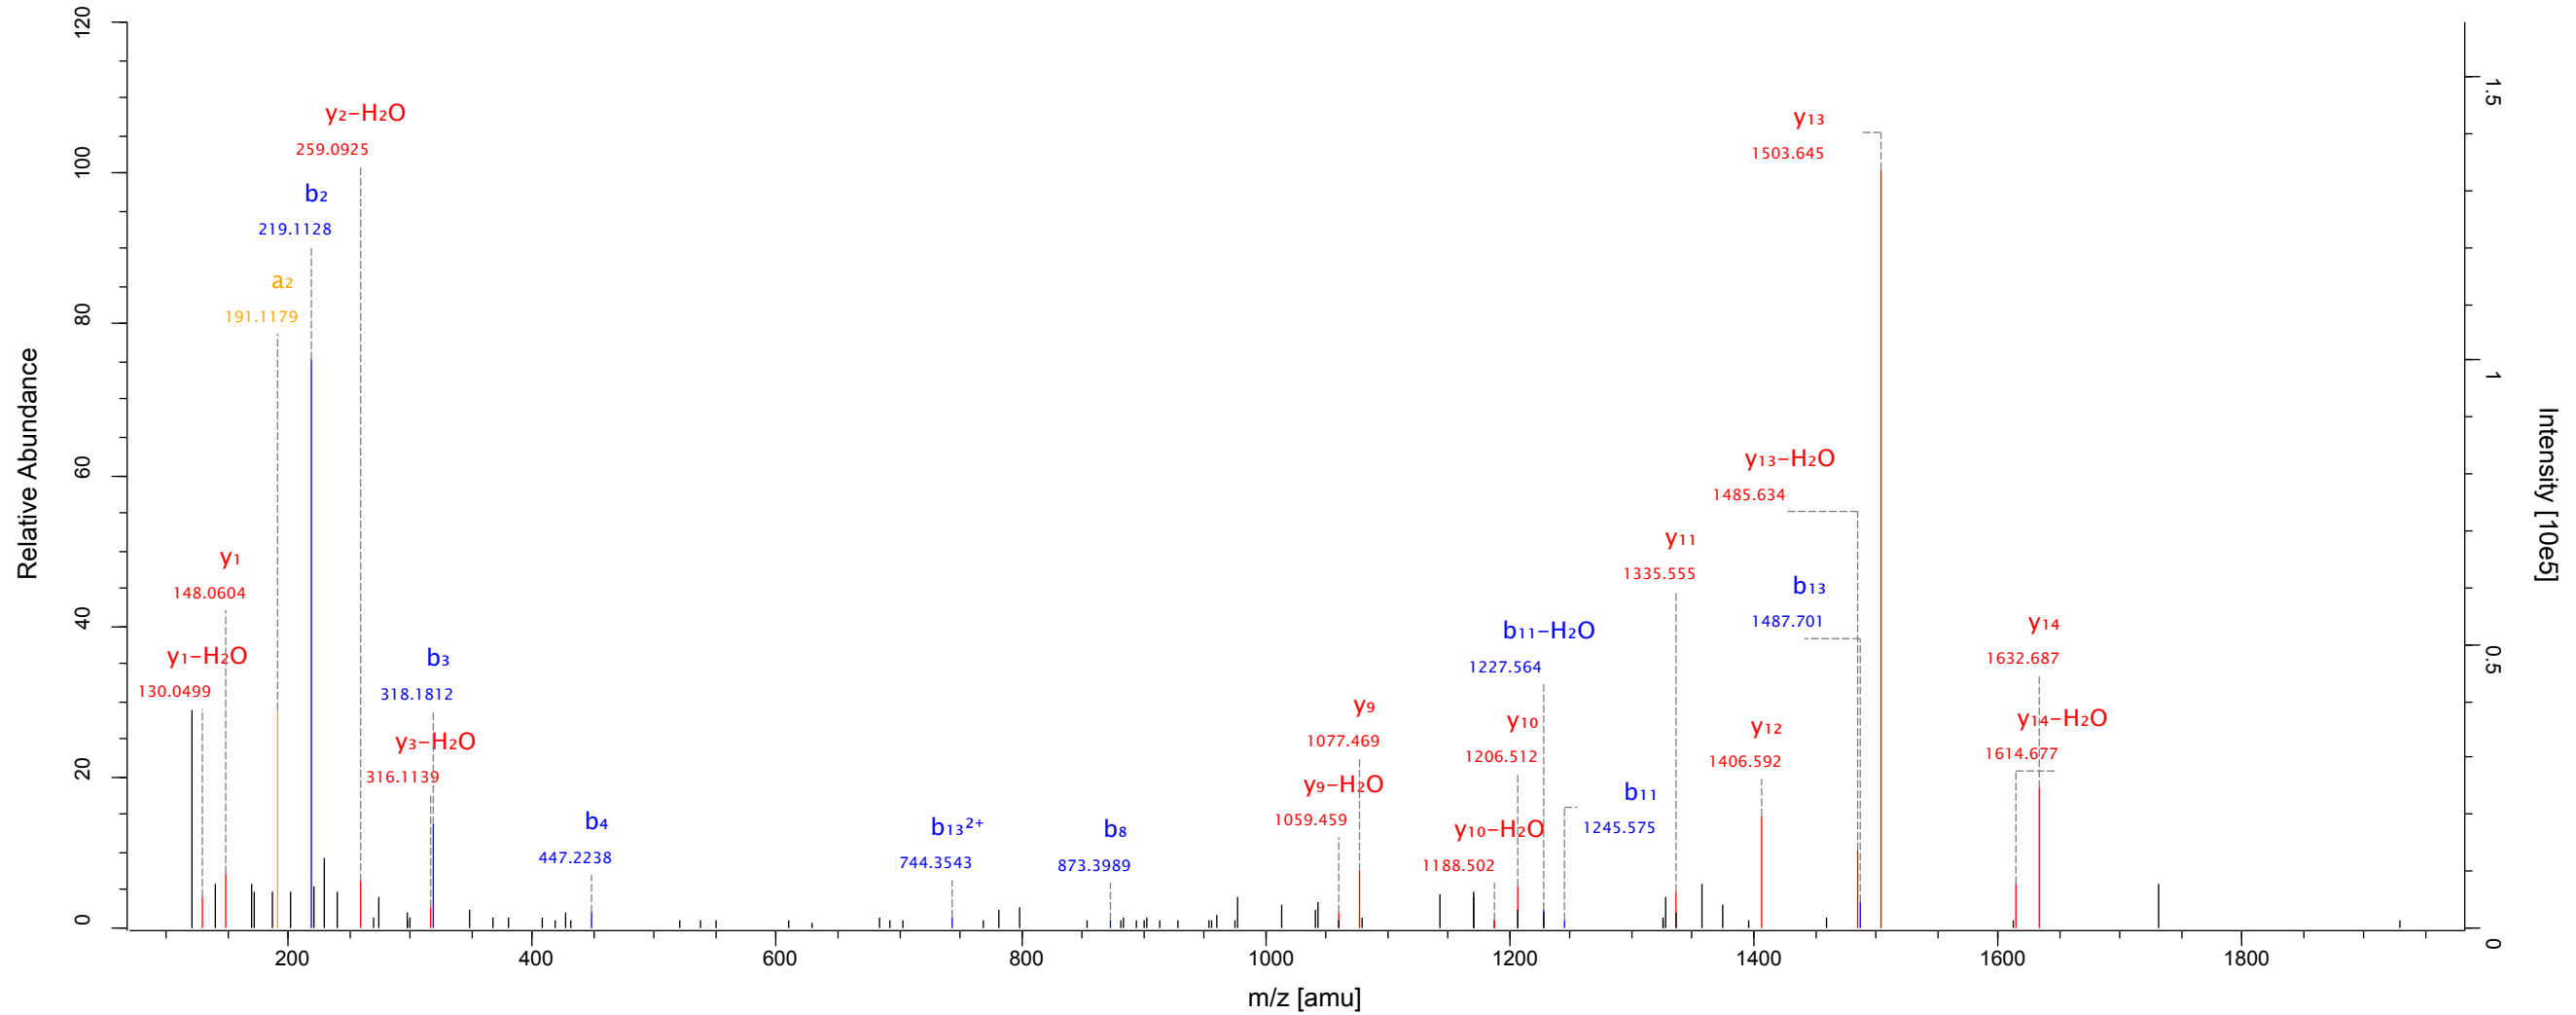

# peptide ID 81

Source: 20120816\_CO\_0340Gaje\_R02  
Scannumber: 8125  
Protein: pep\_secretome\_23546  
Peptide Score: 52.72  
Method: FTMS; HCD; 1

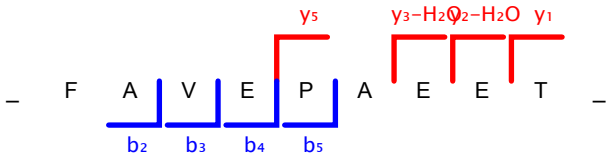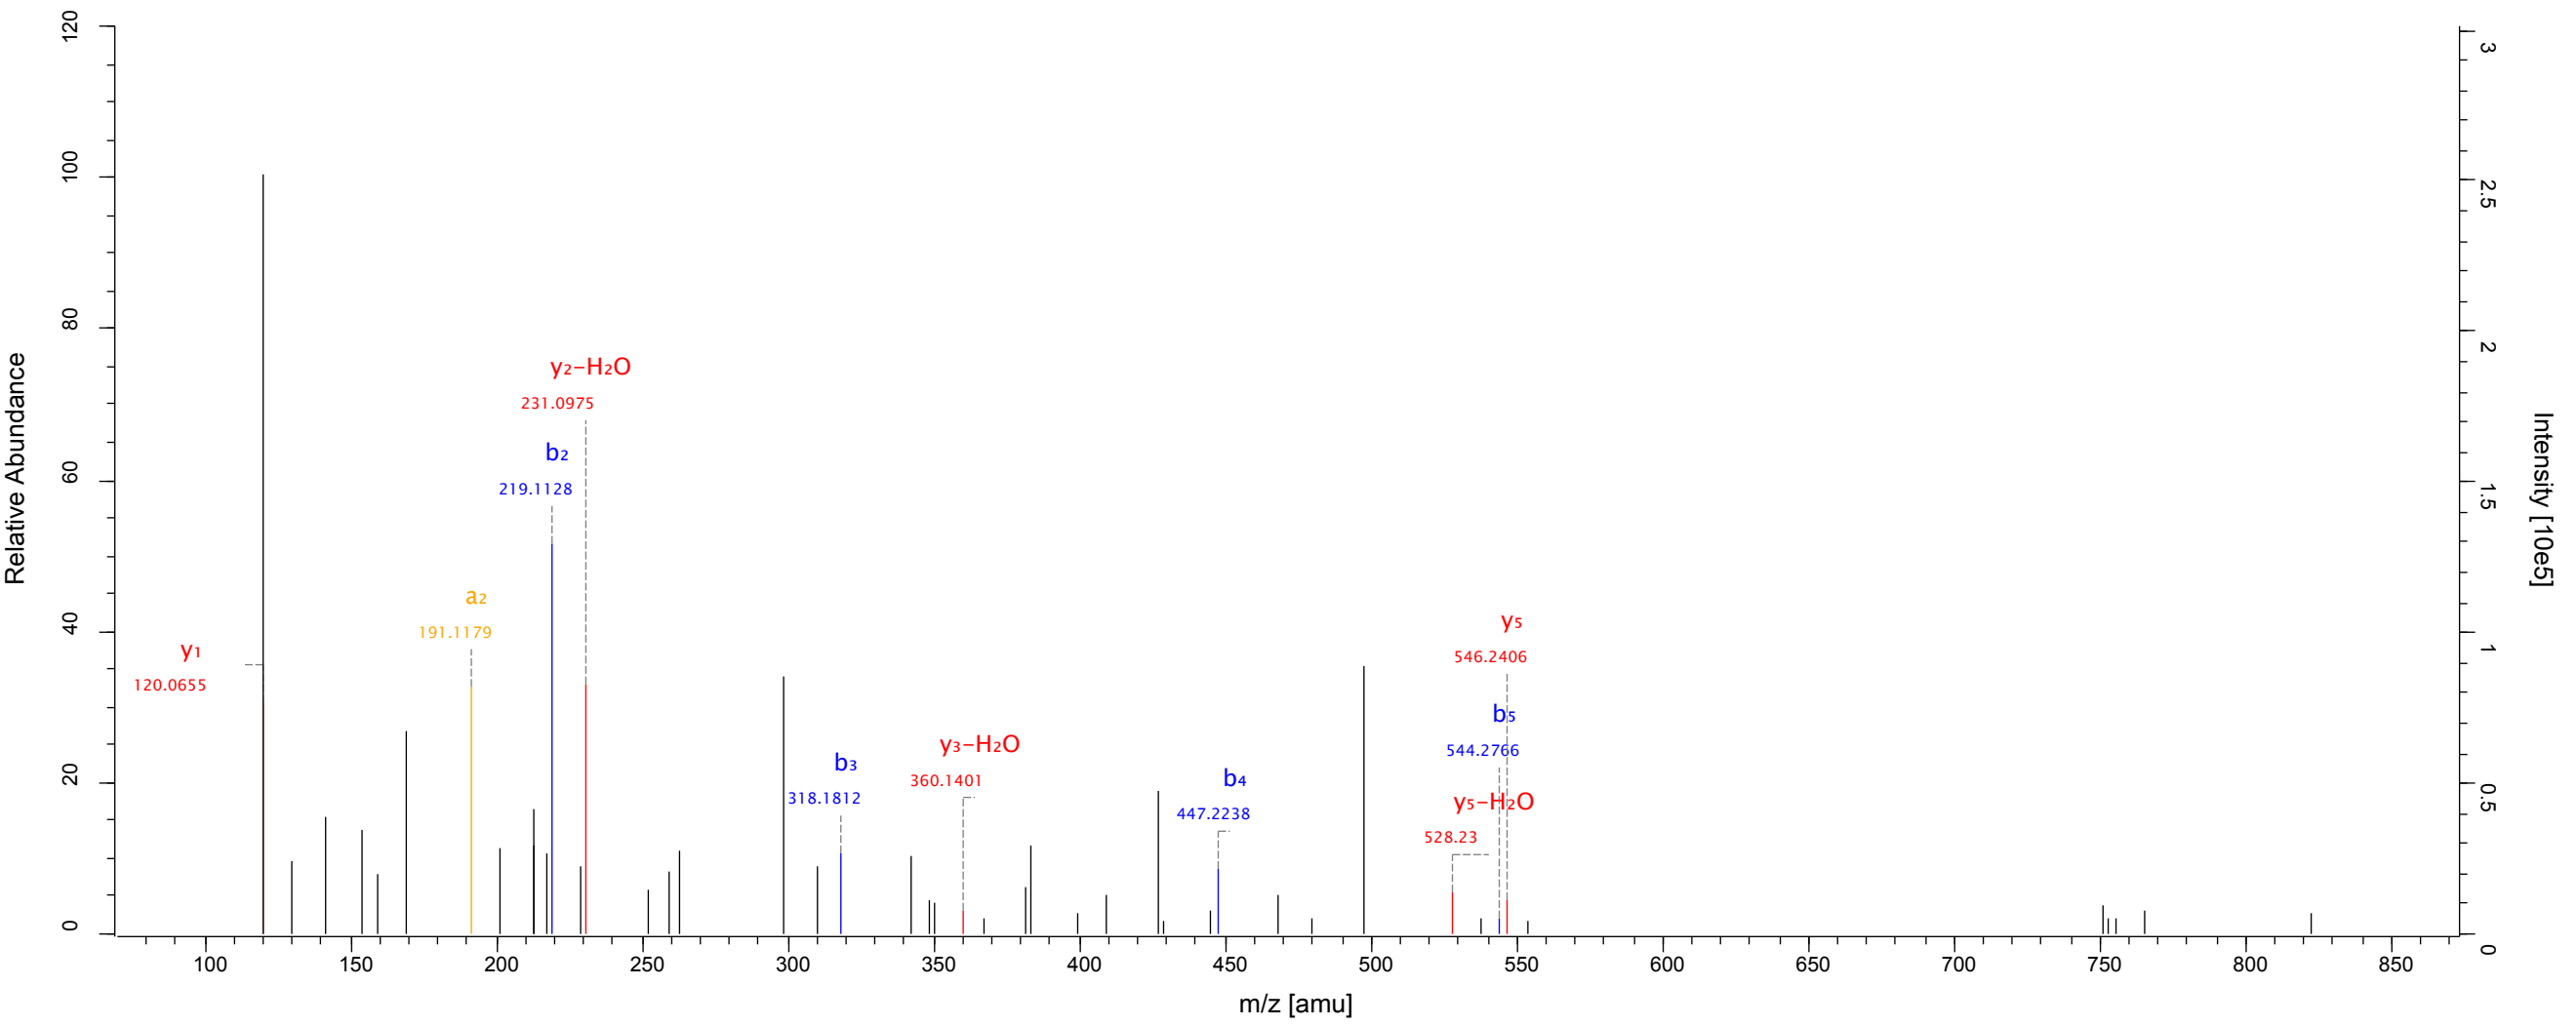

# peptide ID 82

Source: 20120515\_CO\_0340Gaje\_R01  
Scannumber: 5714  
Protein: orf\_7277; orf\_11195; pep\_secretome\_625  
Peptide Score: 156.5  
Method: FTMS; HCD; 1

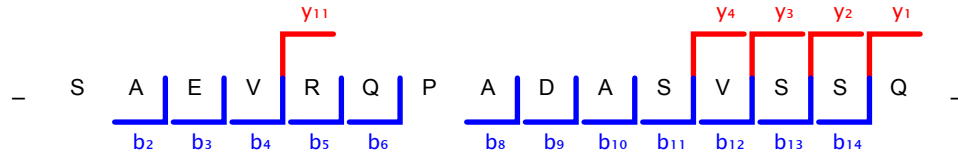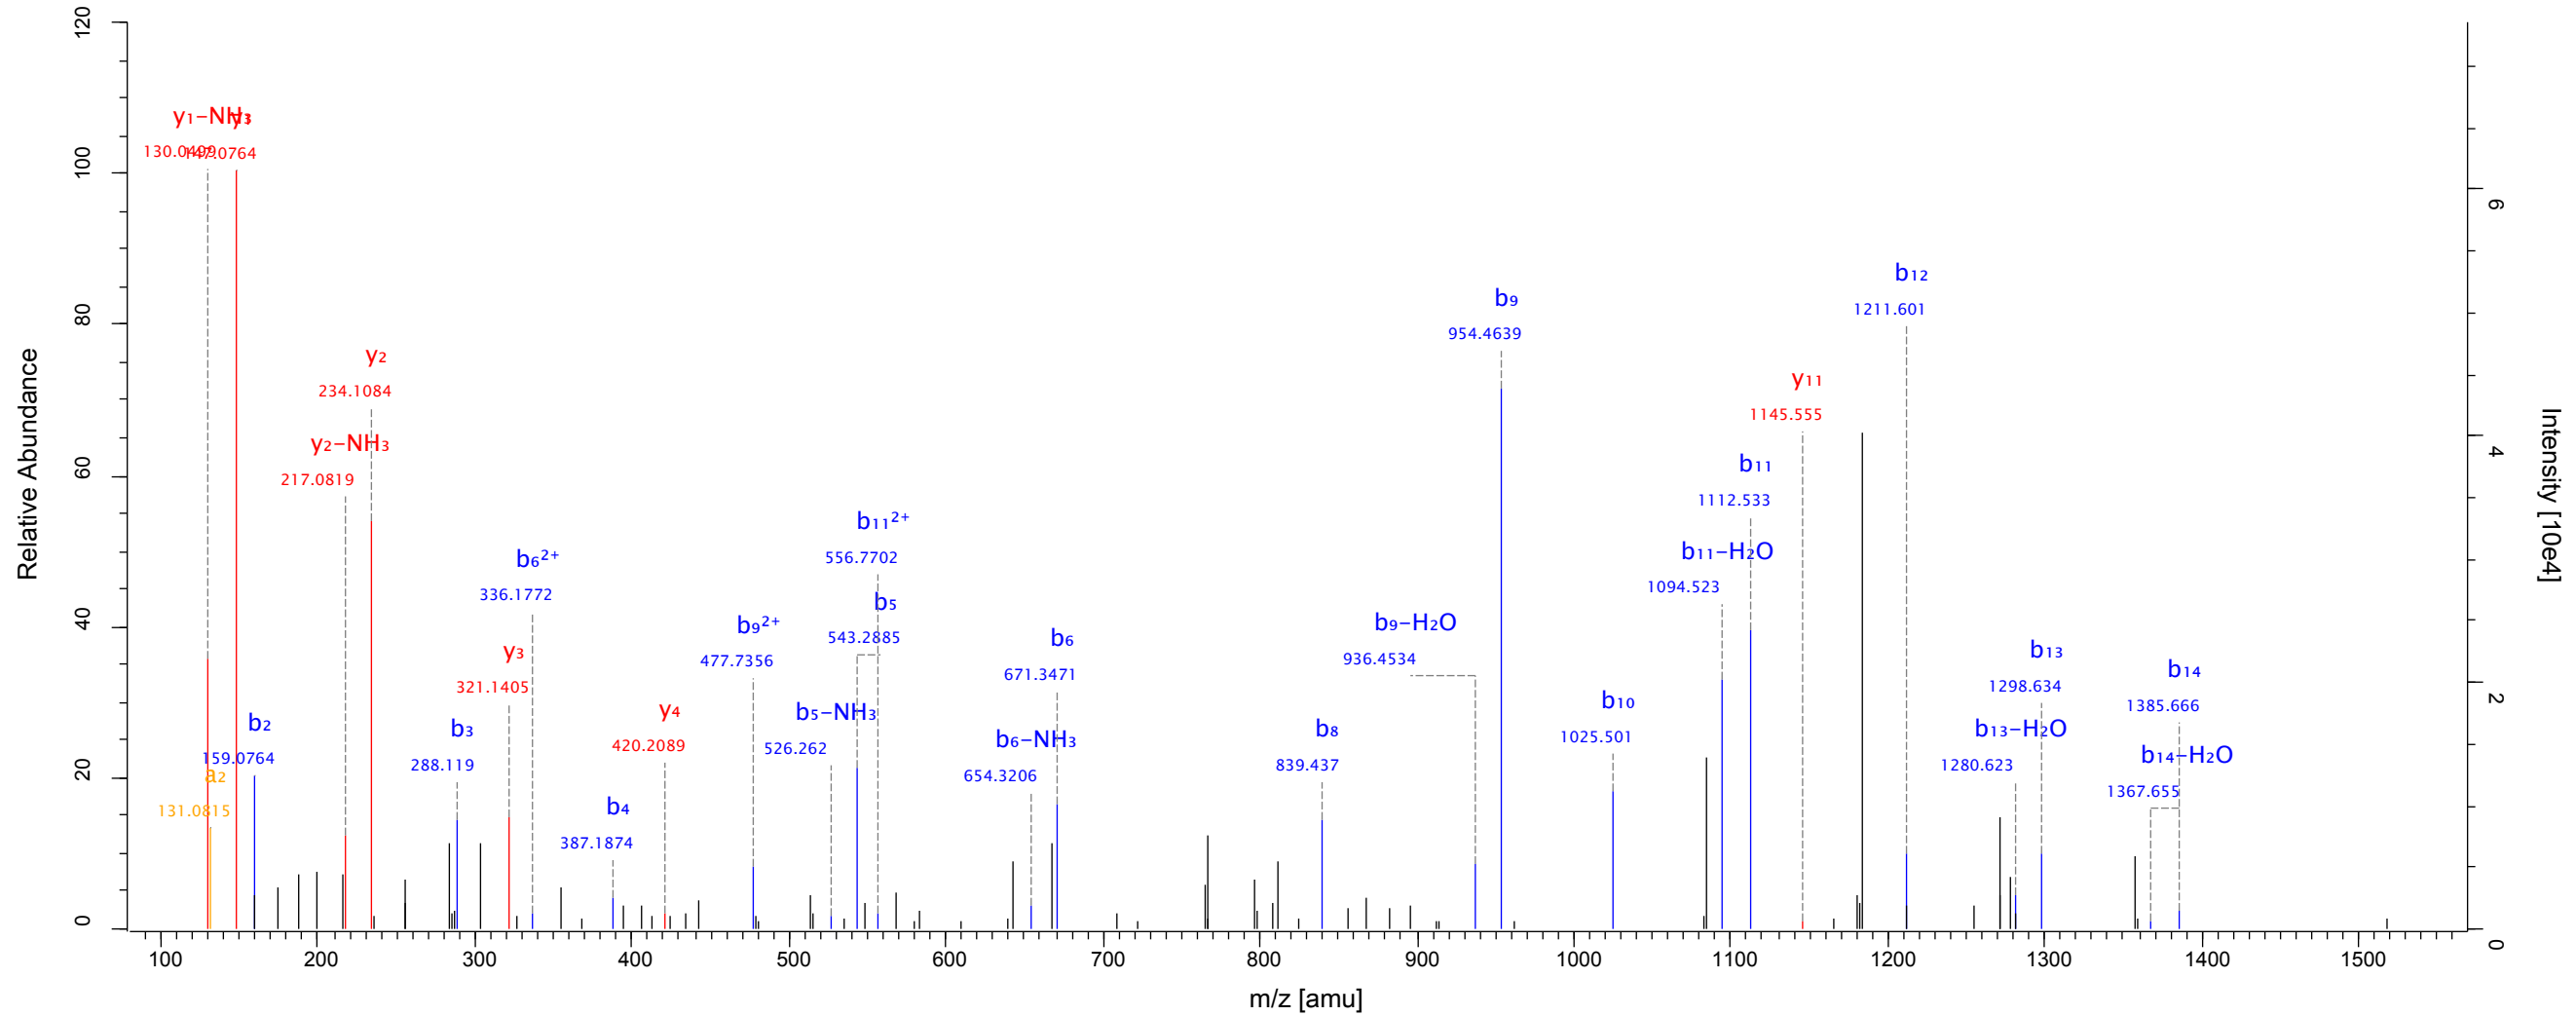

# peptide ID 83

Source: 20120816\_CO\_0340Gaje\_R02  
Scannumber: 14863  
Protein: pep\_secretome\_3207  
Peptide Score: 103.22  
Method: FTMS; HCD; 1

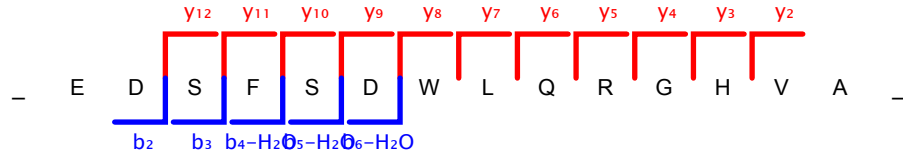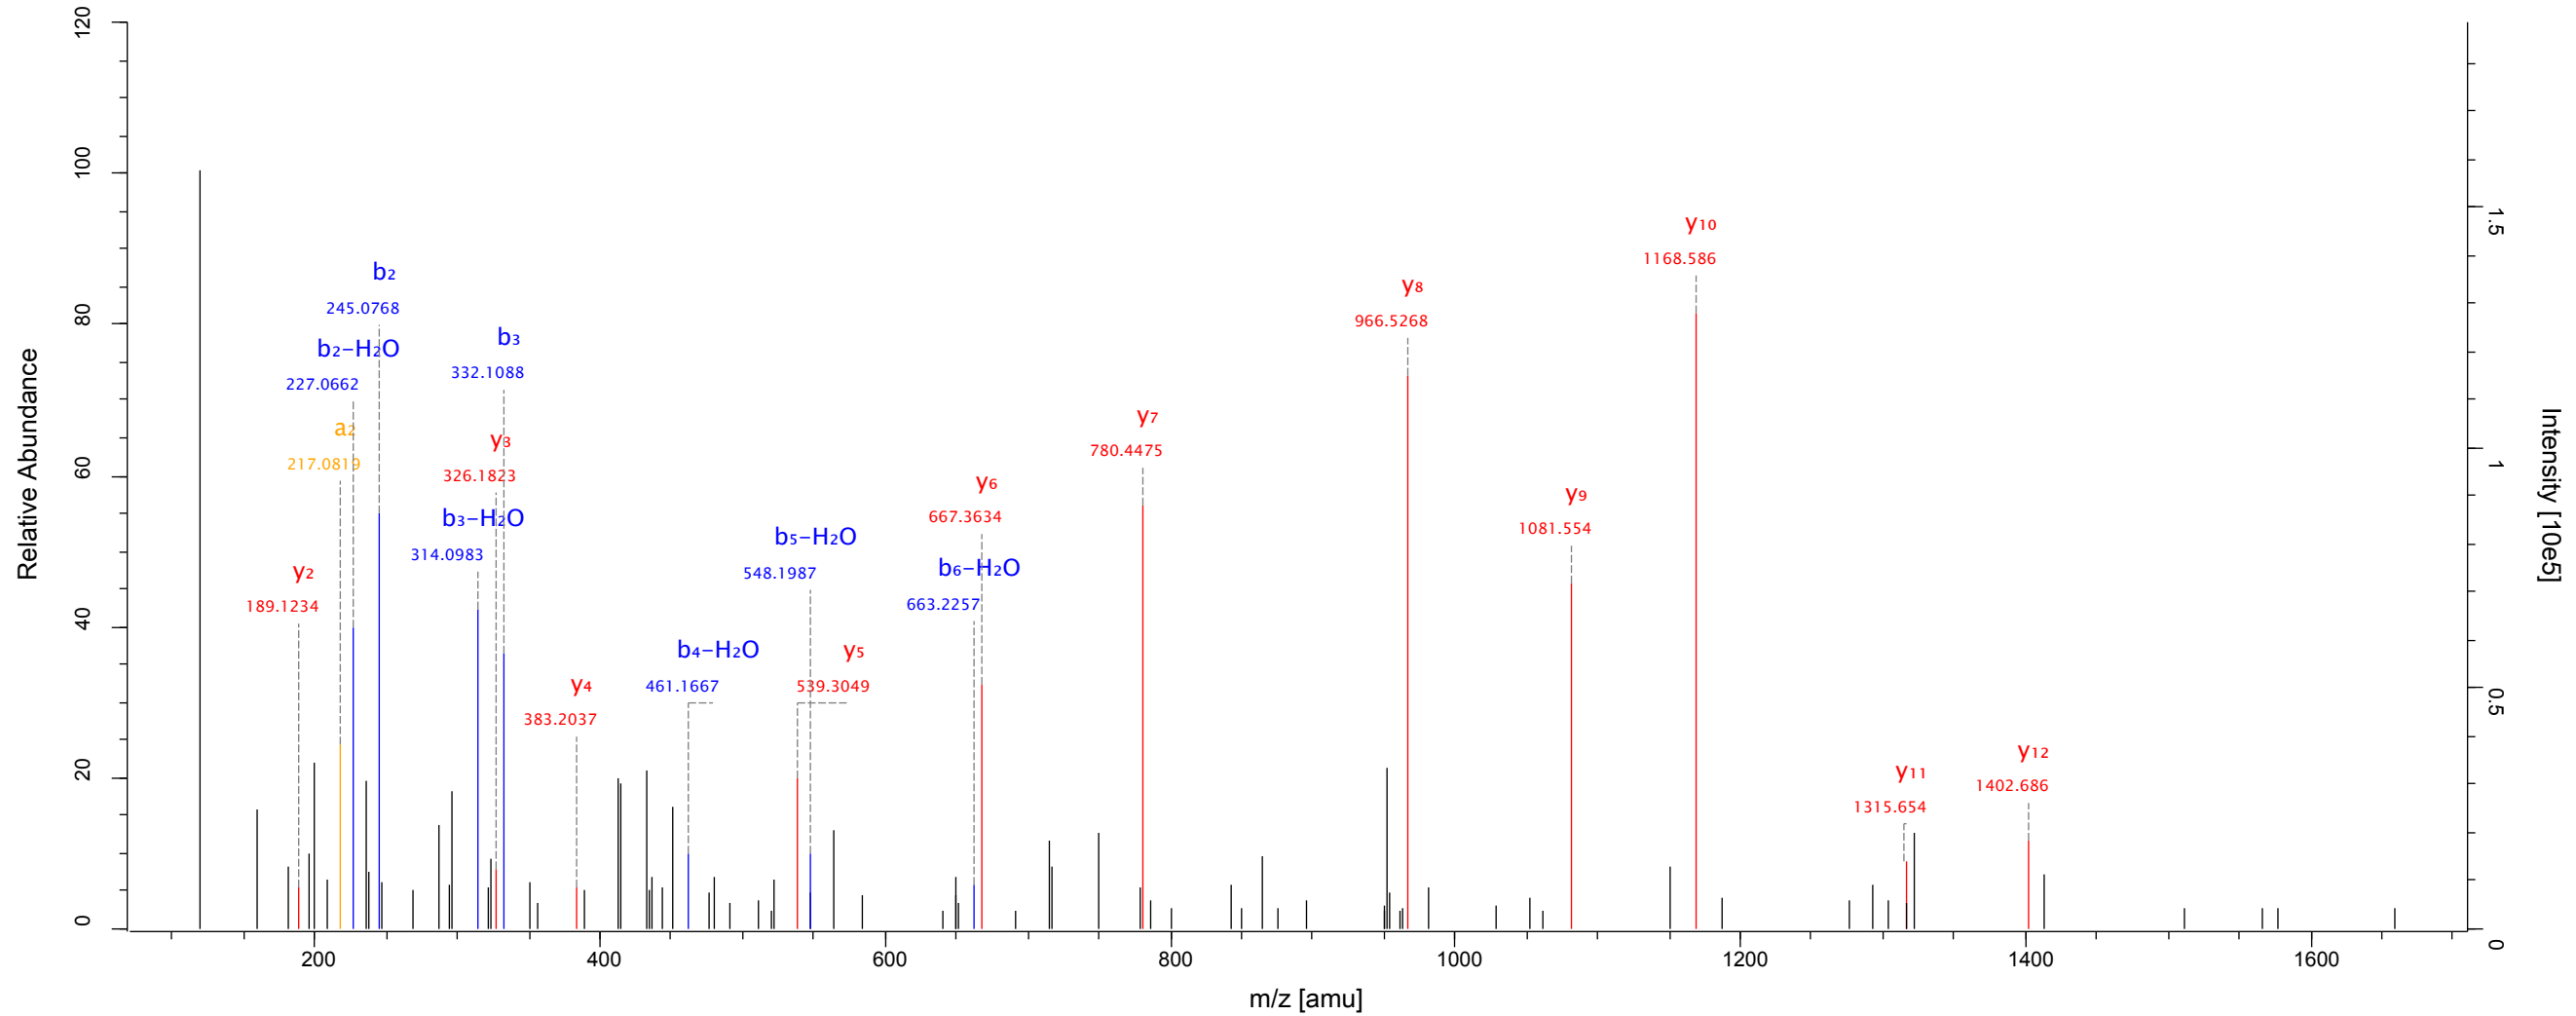

# peptide ID 84

Source: 20120816\_CO\_0340Gaje\_R02  
Scannumber: 14419  
Protein: pep\_secretome\_8447  
Peptide Score: 51.03  
Method: FTMS; HCD; 1

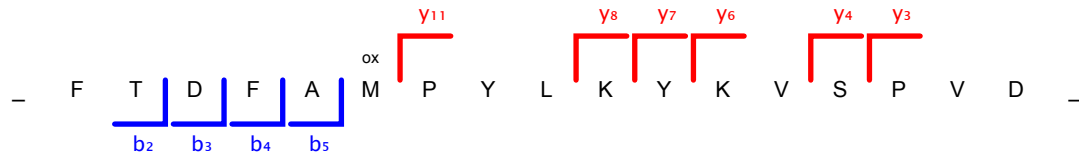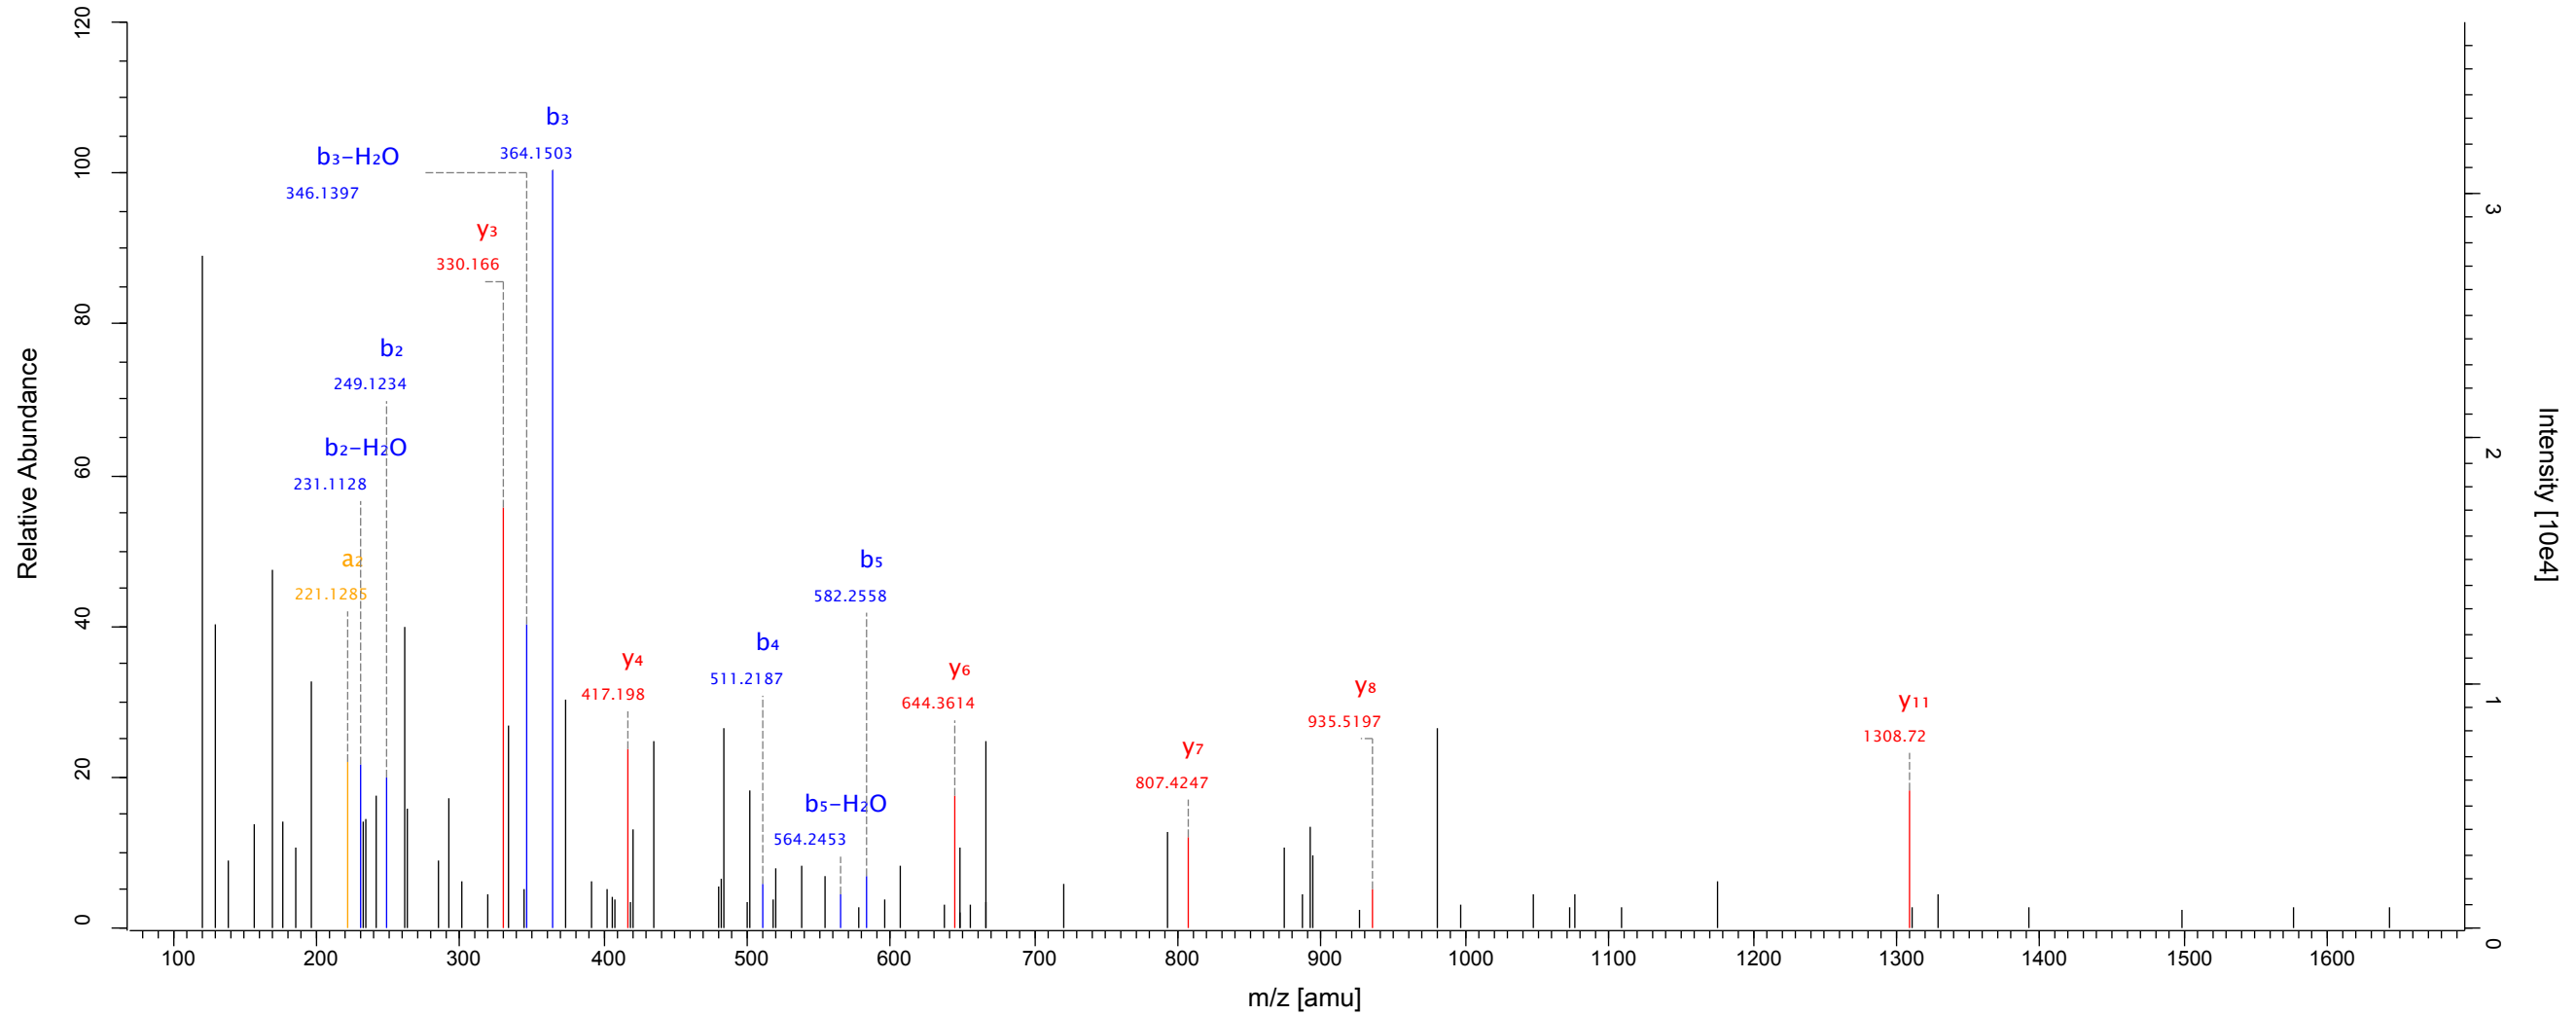



# peptide ID 85

Source: 20120816\_CO\_0340Gaje\_R02  
Scannumber: 9146  
Protein: pep\_secretome\_528  
Peptide Score: 154.91  
Method: FTMS; HCD; 1

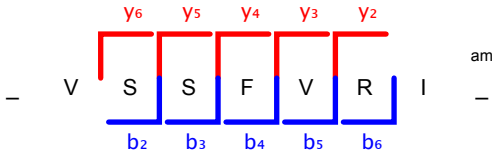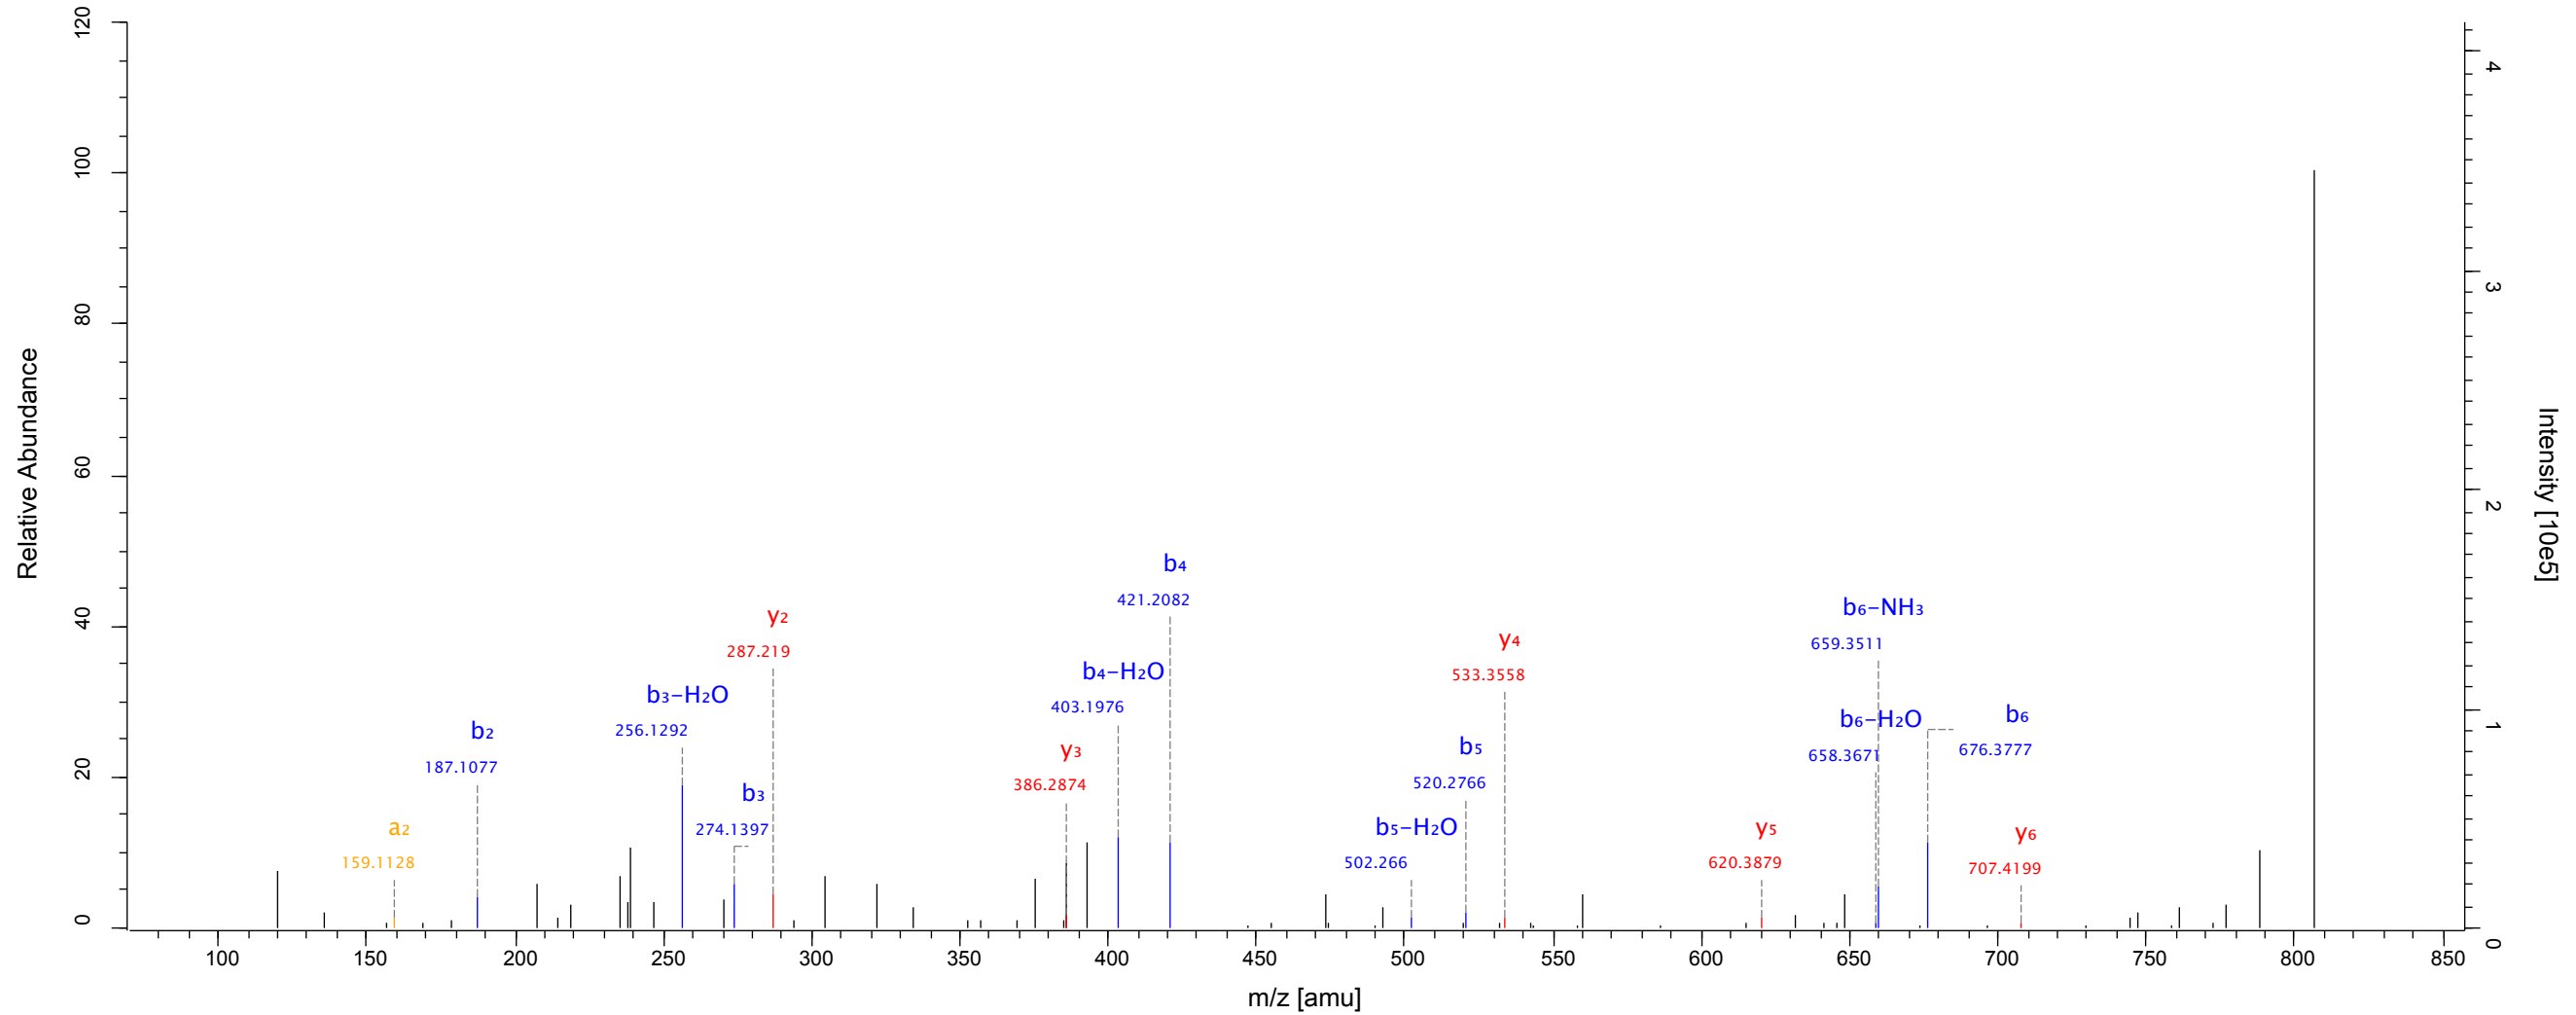

# peptide ID 86

Source: 20121106\_CO\_0340Gaje\_R02\_2  
Scannumber: 7182  
Protein: pep\_secretome\_533; pep\_secretome\_540  
Peptide Score: 163.53  
Method: FTMS; HCD; 1

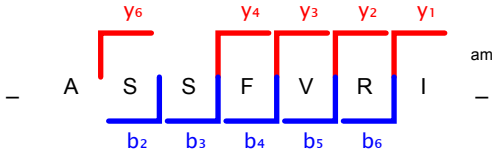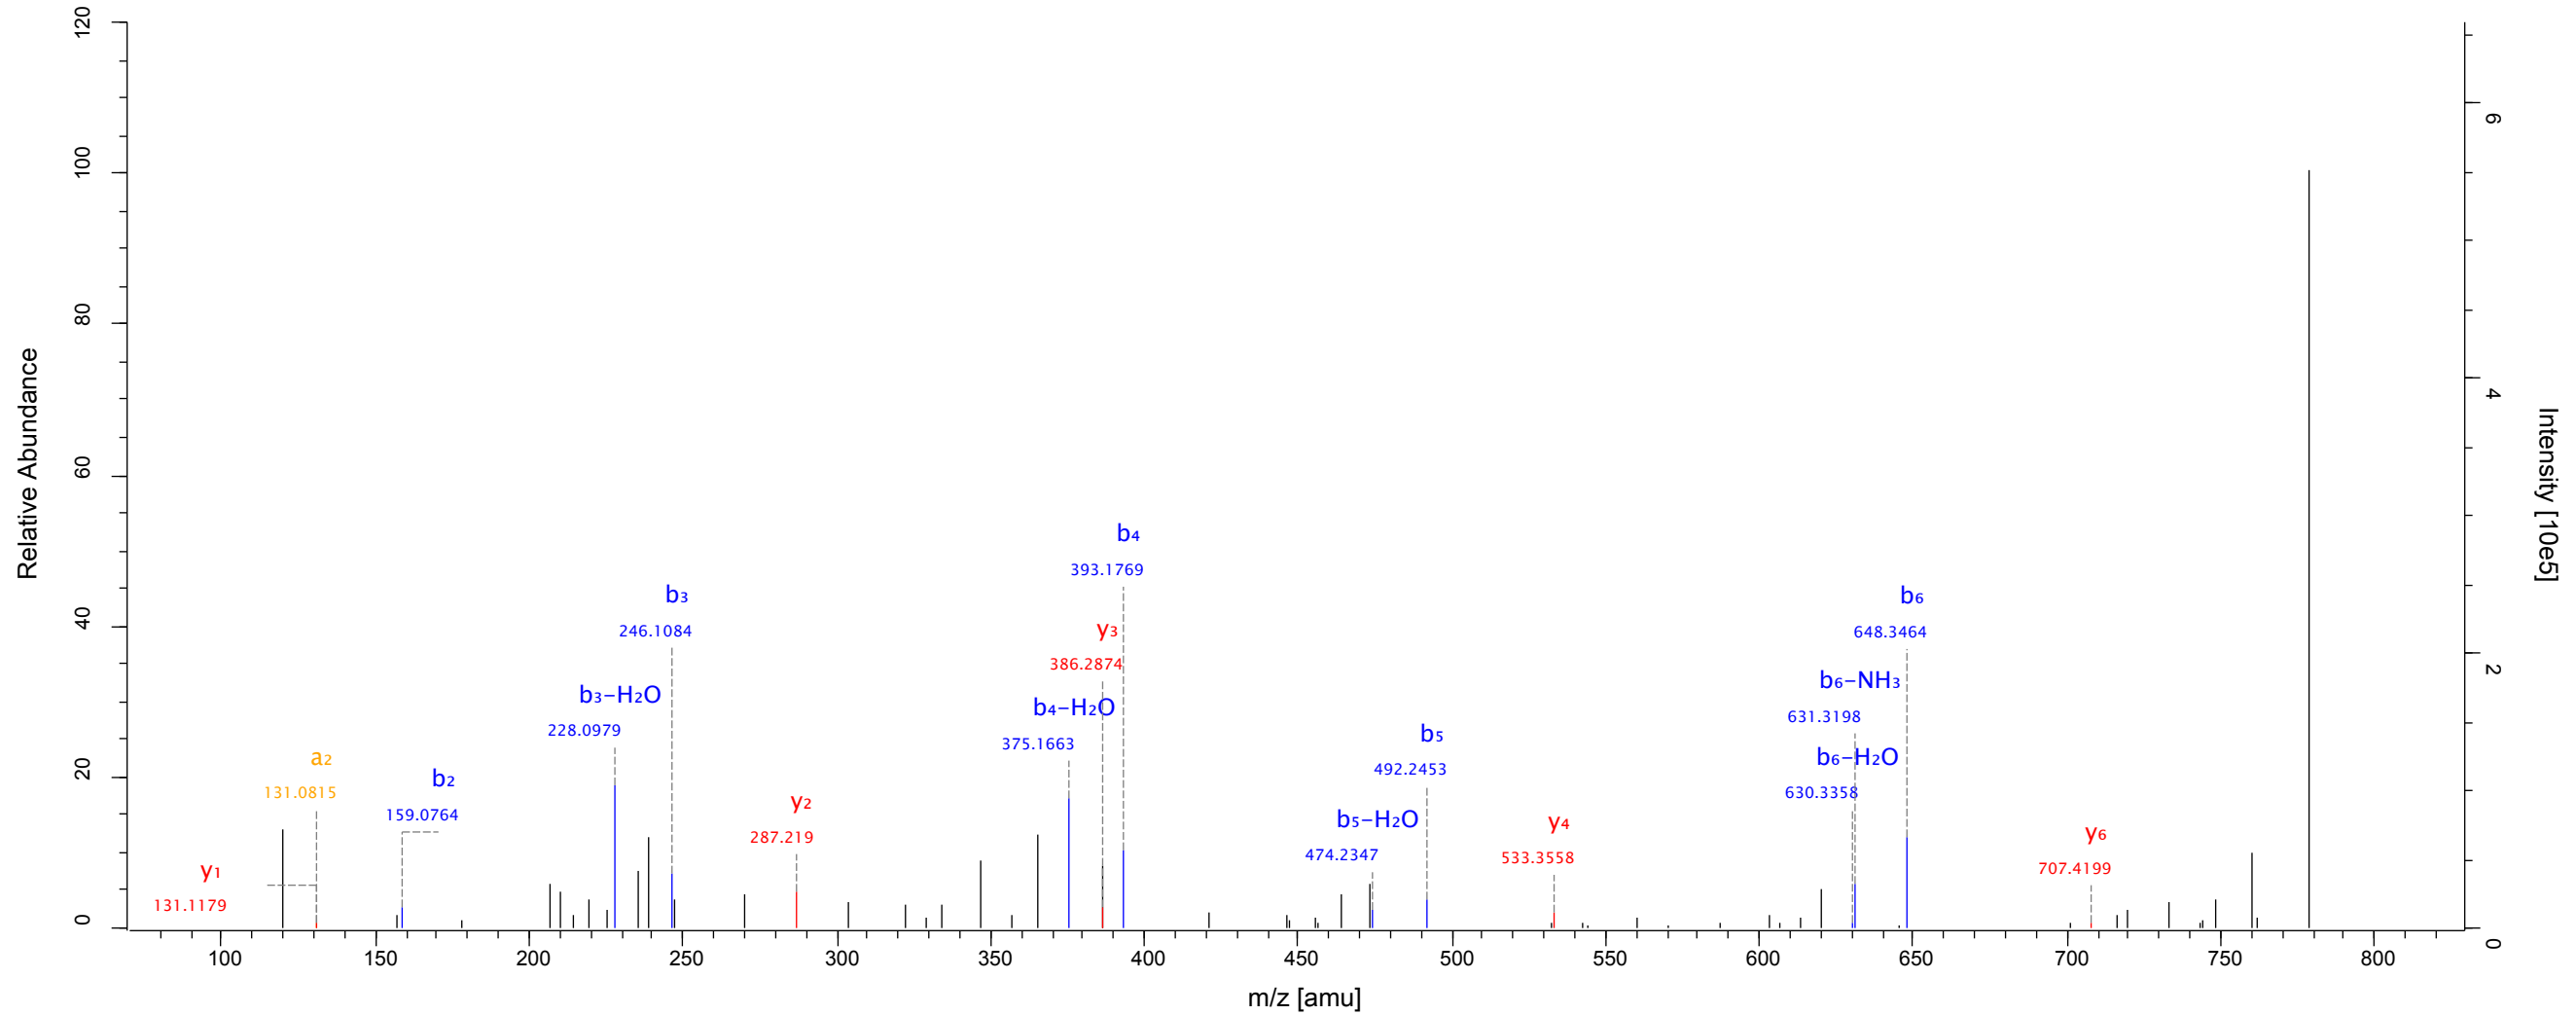

# peptide ID 87

Source: 20120816\_CO\_0340Gaje\_R02  
Scannumber: 9958  
Protein: pep\_secretome\_10386  
Peptide Score: 85.55  
Method: FTMS; HCD; 1

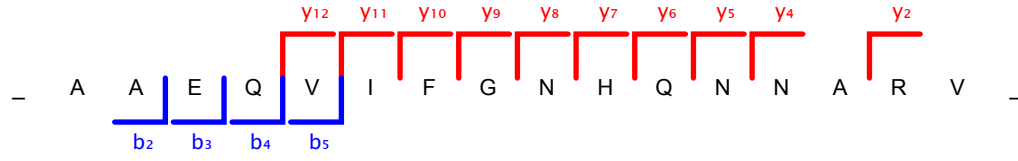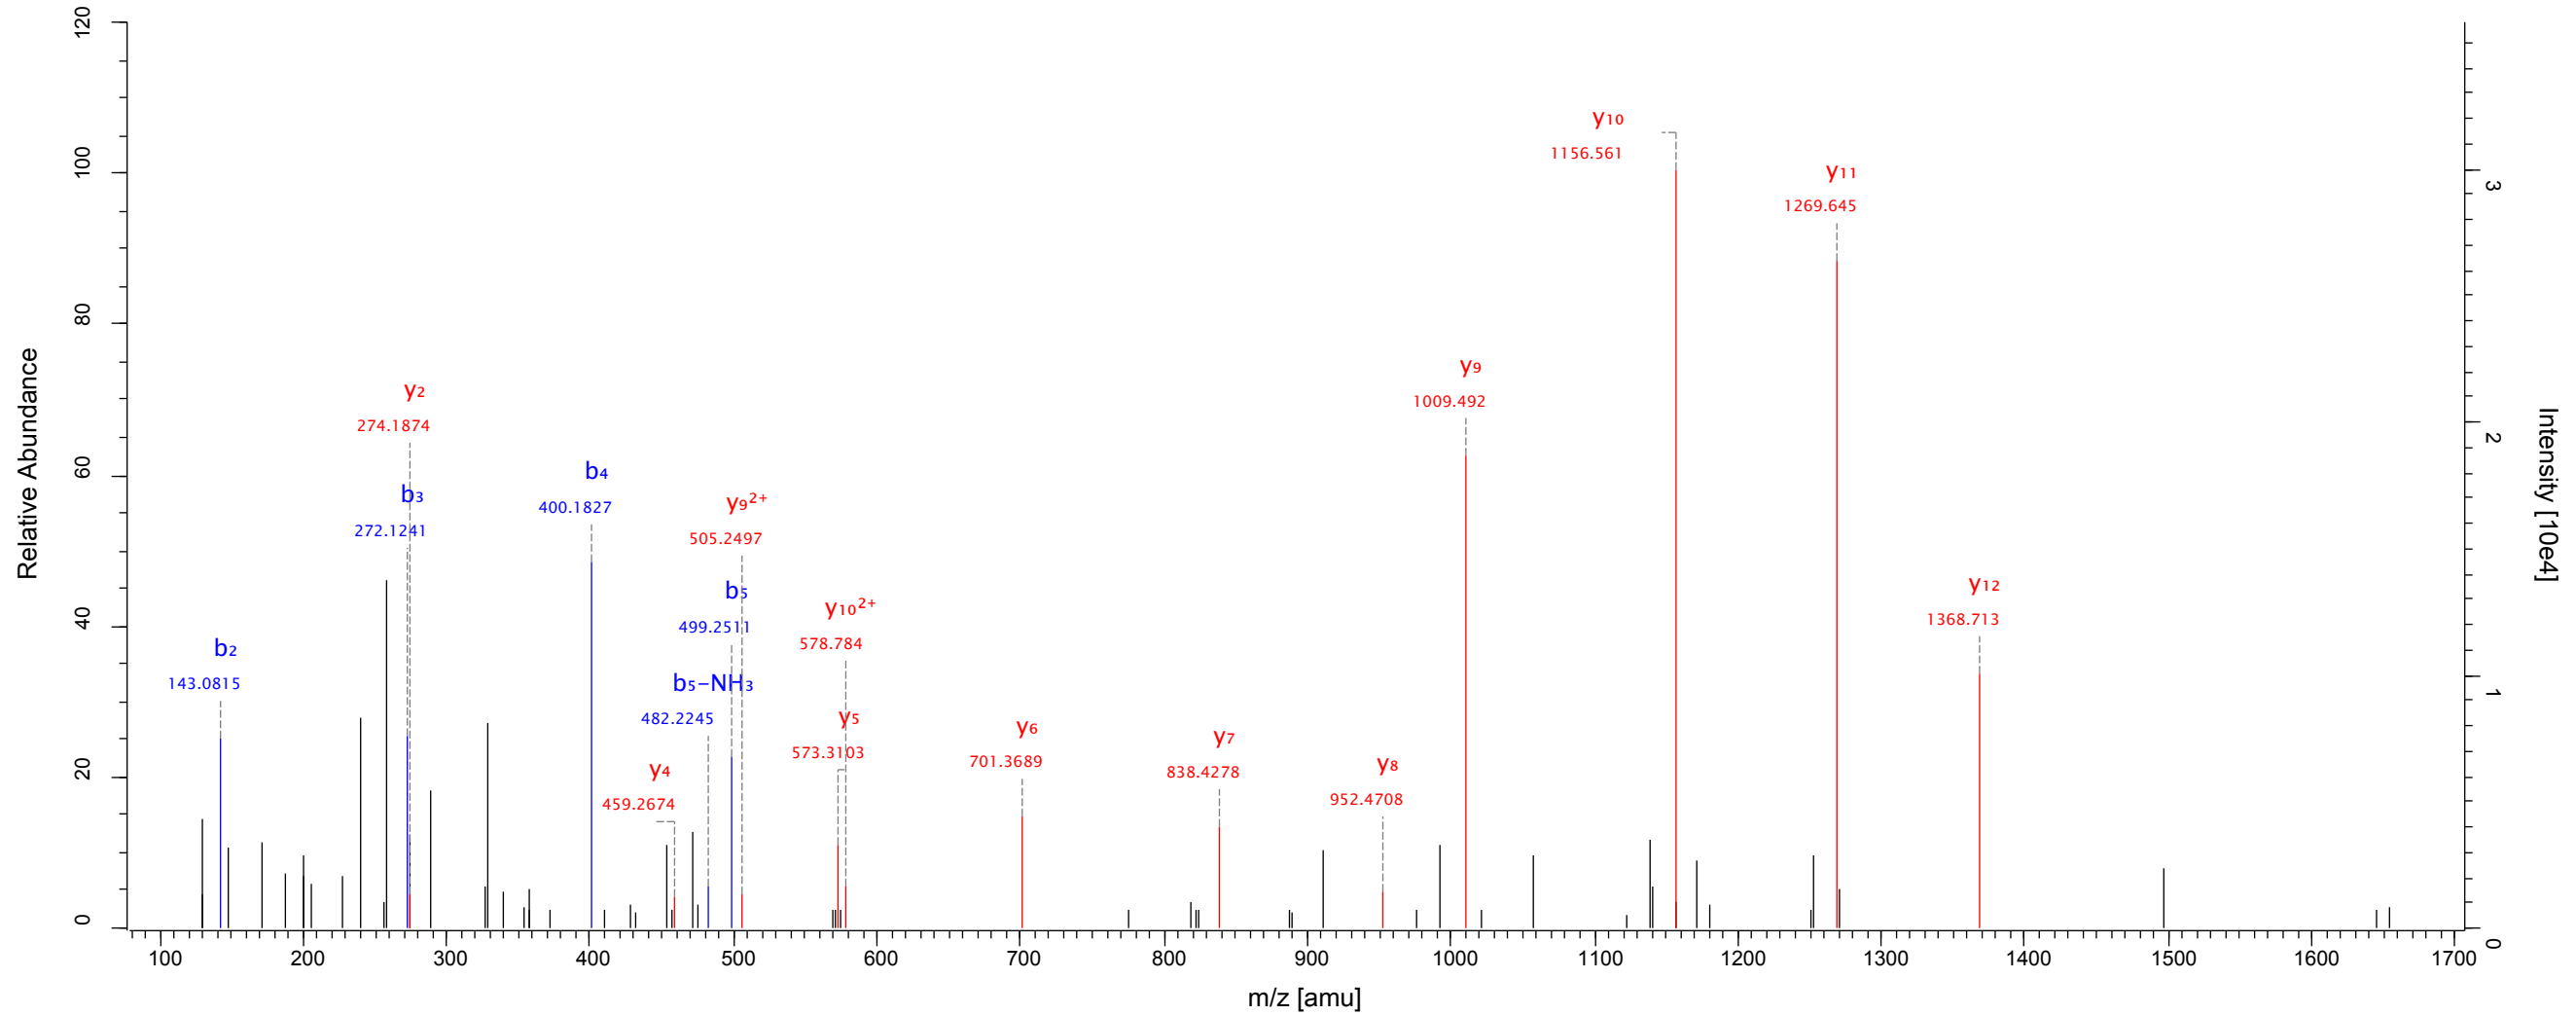

# peptide ID 88

Source: 20121106\_CO\_0340Gaje\_R02\_2  
Scannumber: 13762  
Protein: pep\_secretome\_10395  
Peptide Score: 73.91  
Method: FTMS; HCD; 1

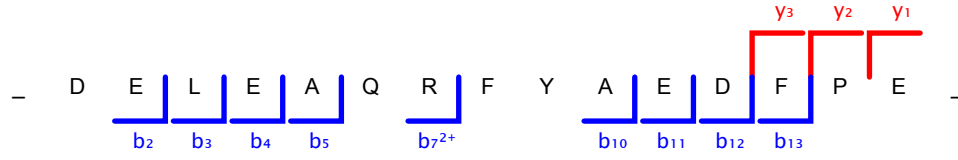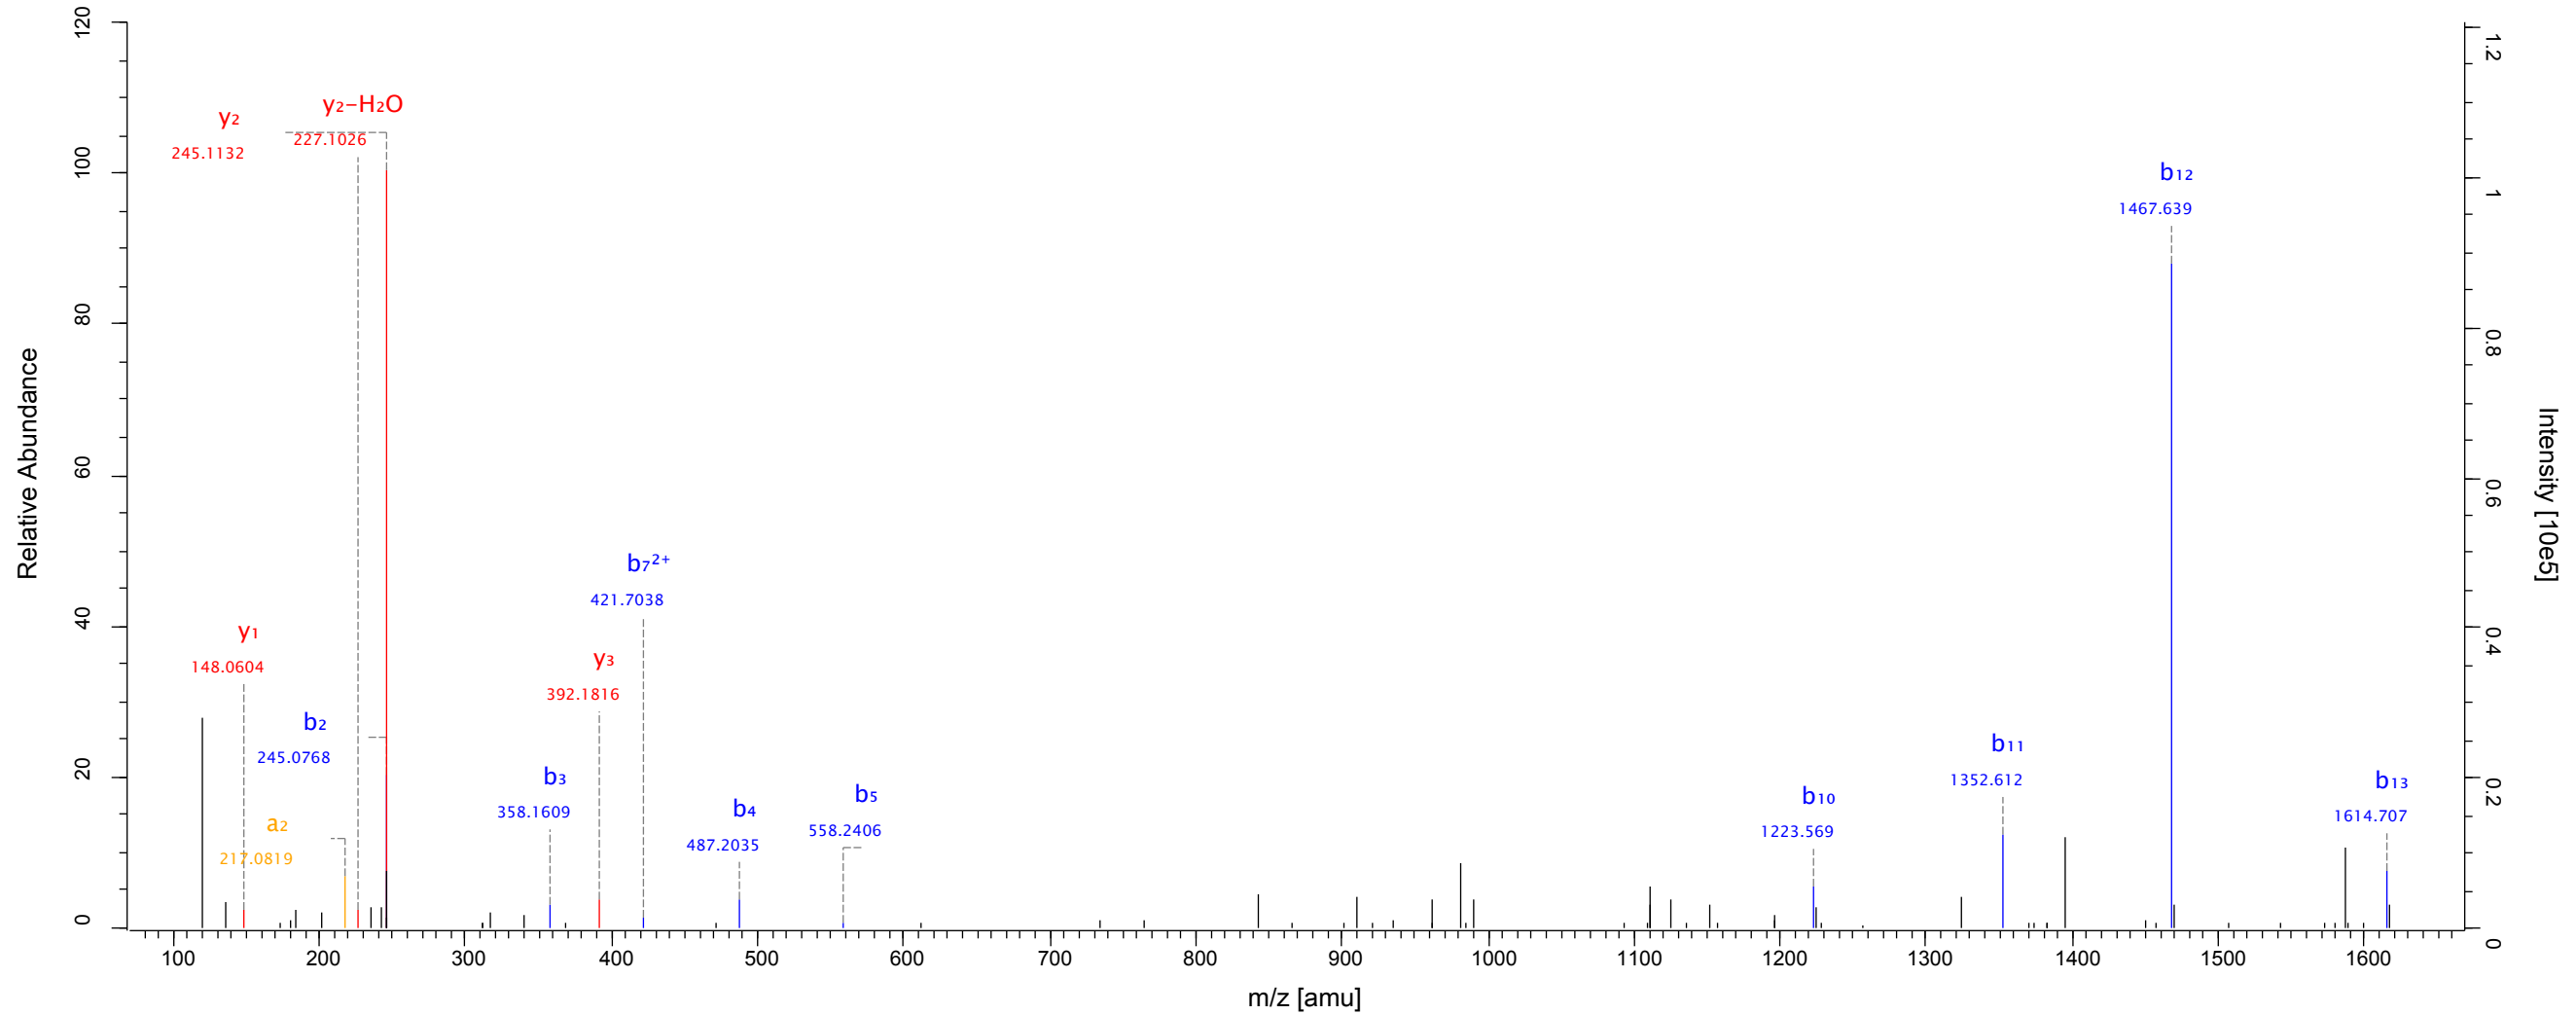

# peptide ID 89

Source: 20120816\_CO\_0340Gaje\_R02  
Scannumber: 7409  
Protein: pep\_secretome\_9793  
Peptide Score: 63.73  
Method: FTMS; HCD; 1

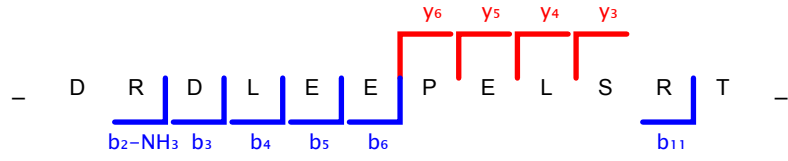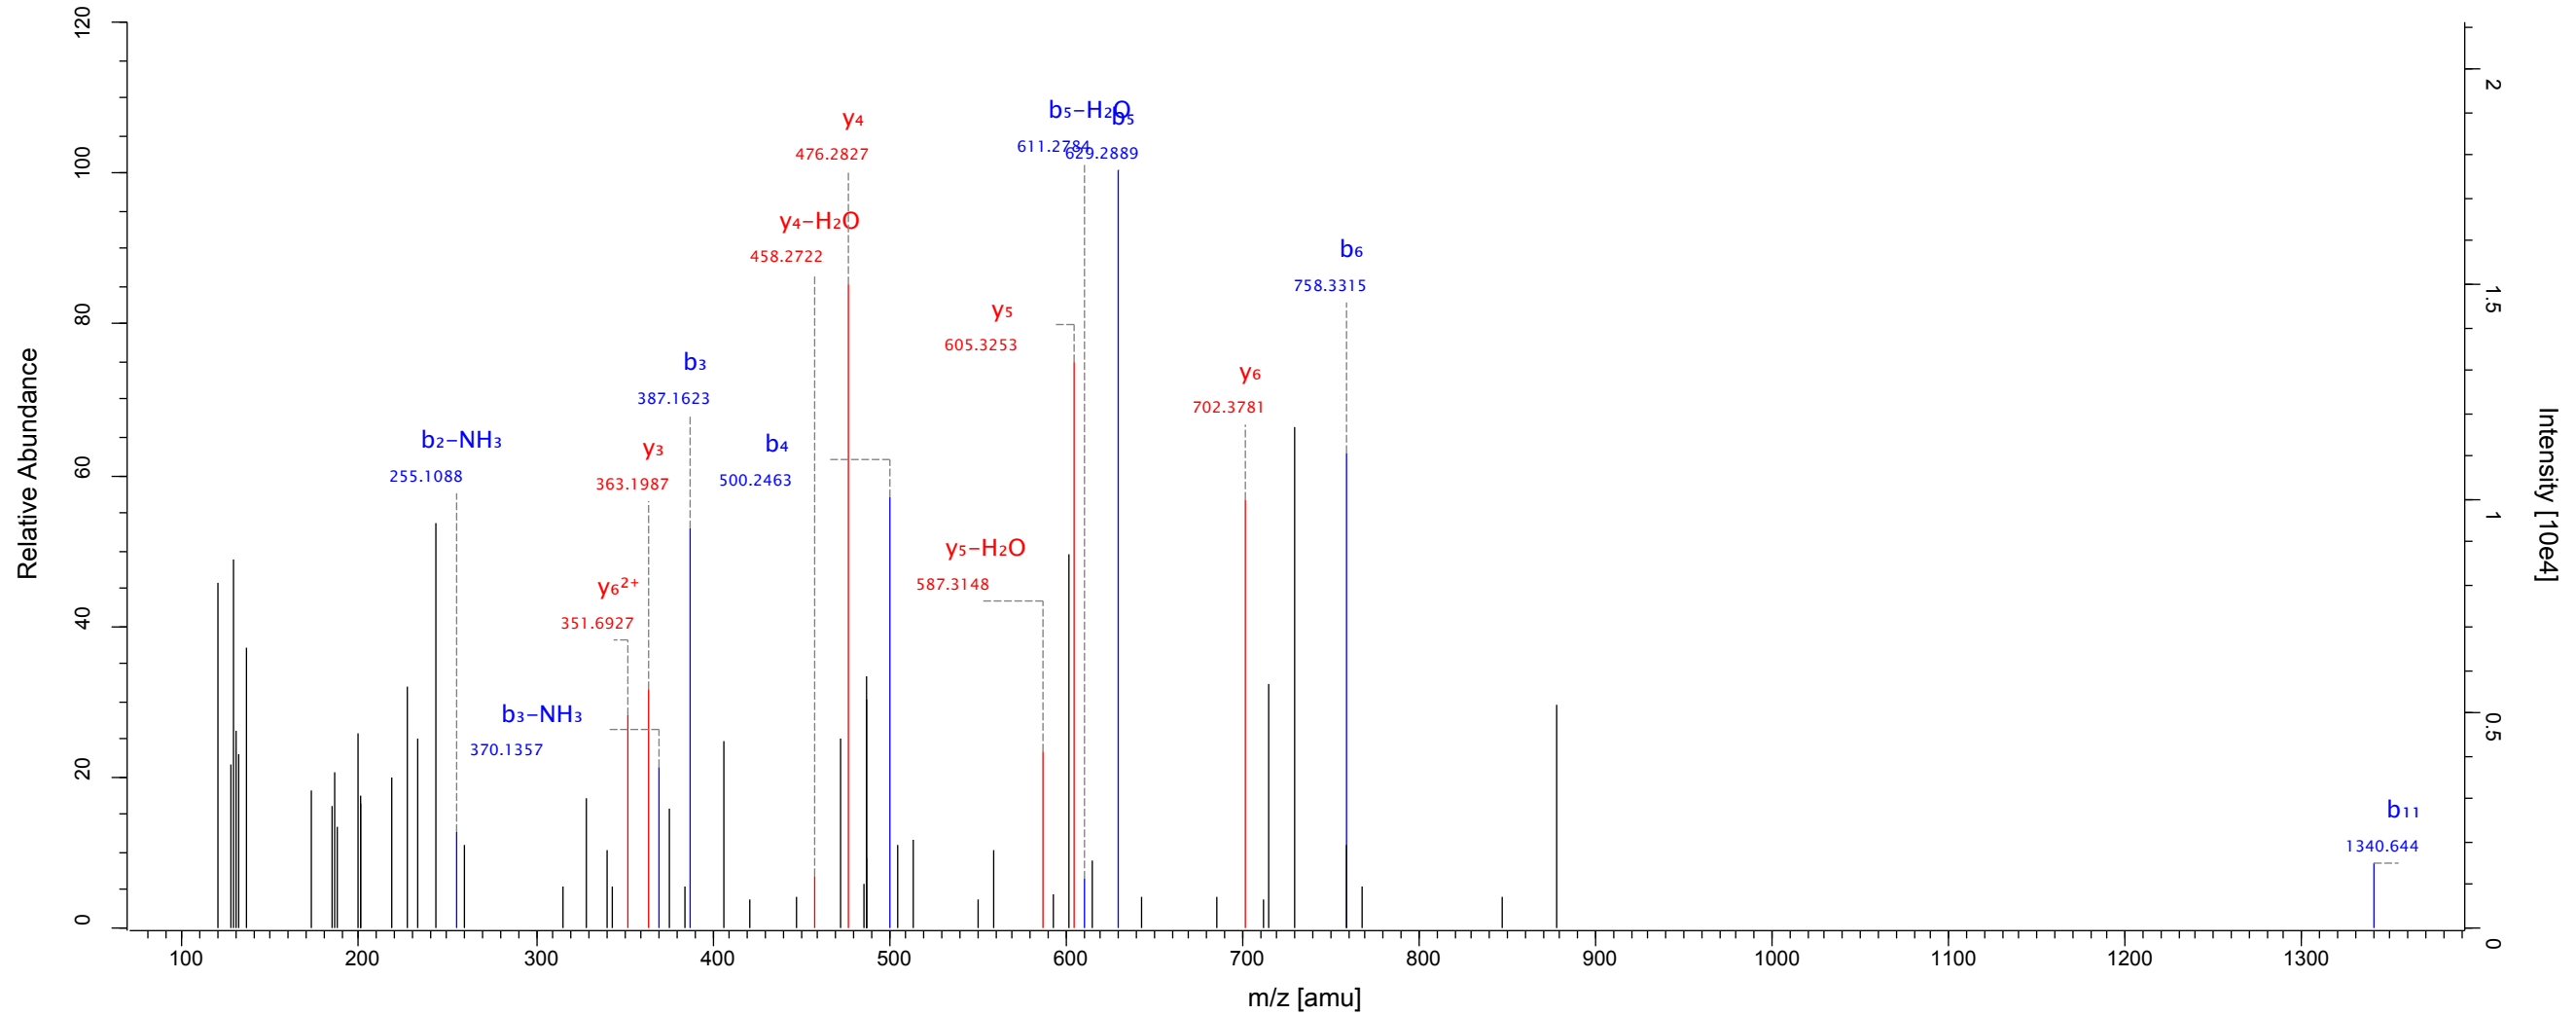

# peptide ID 90

Source: 20120816\_CO\_0340Gaje\_R02  
Scannumber: 5729  
Protein: pep\_secretome\_9794  
Peptide Score: 95.57  
Method: FTMS; HCD; 1

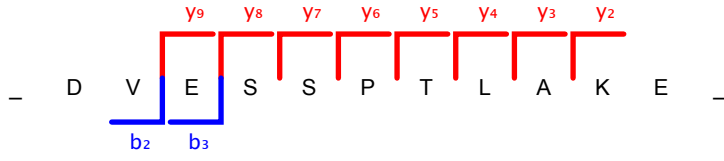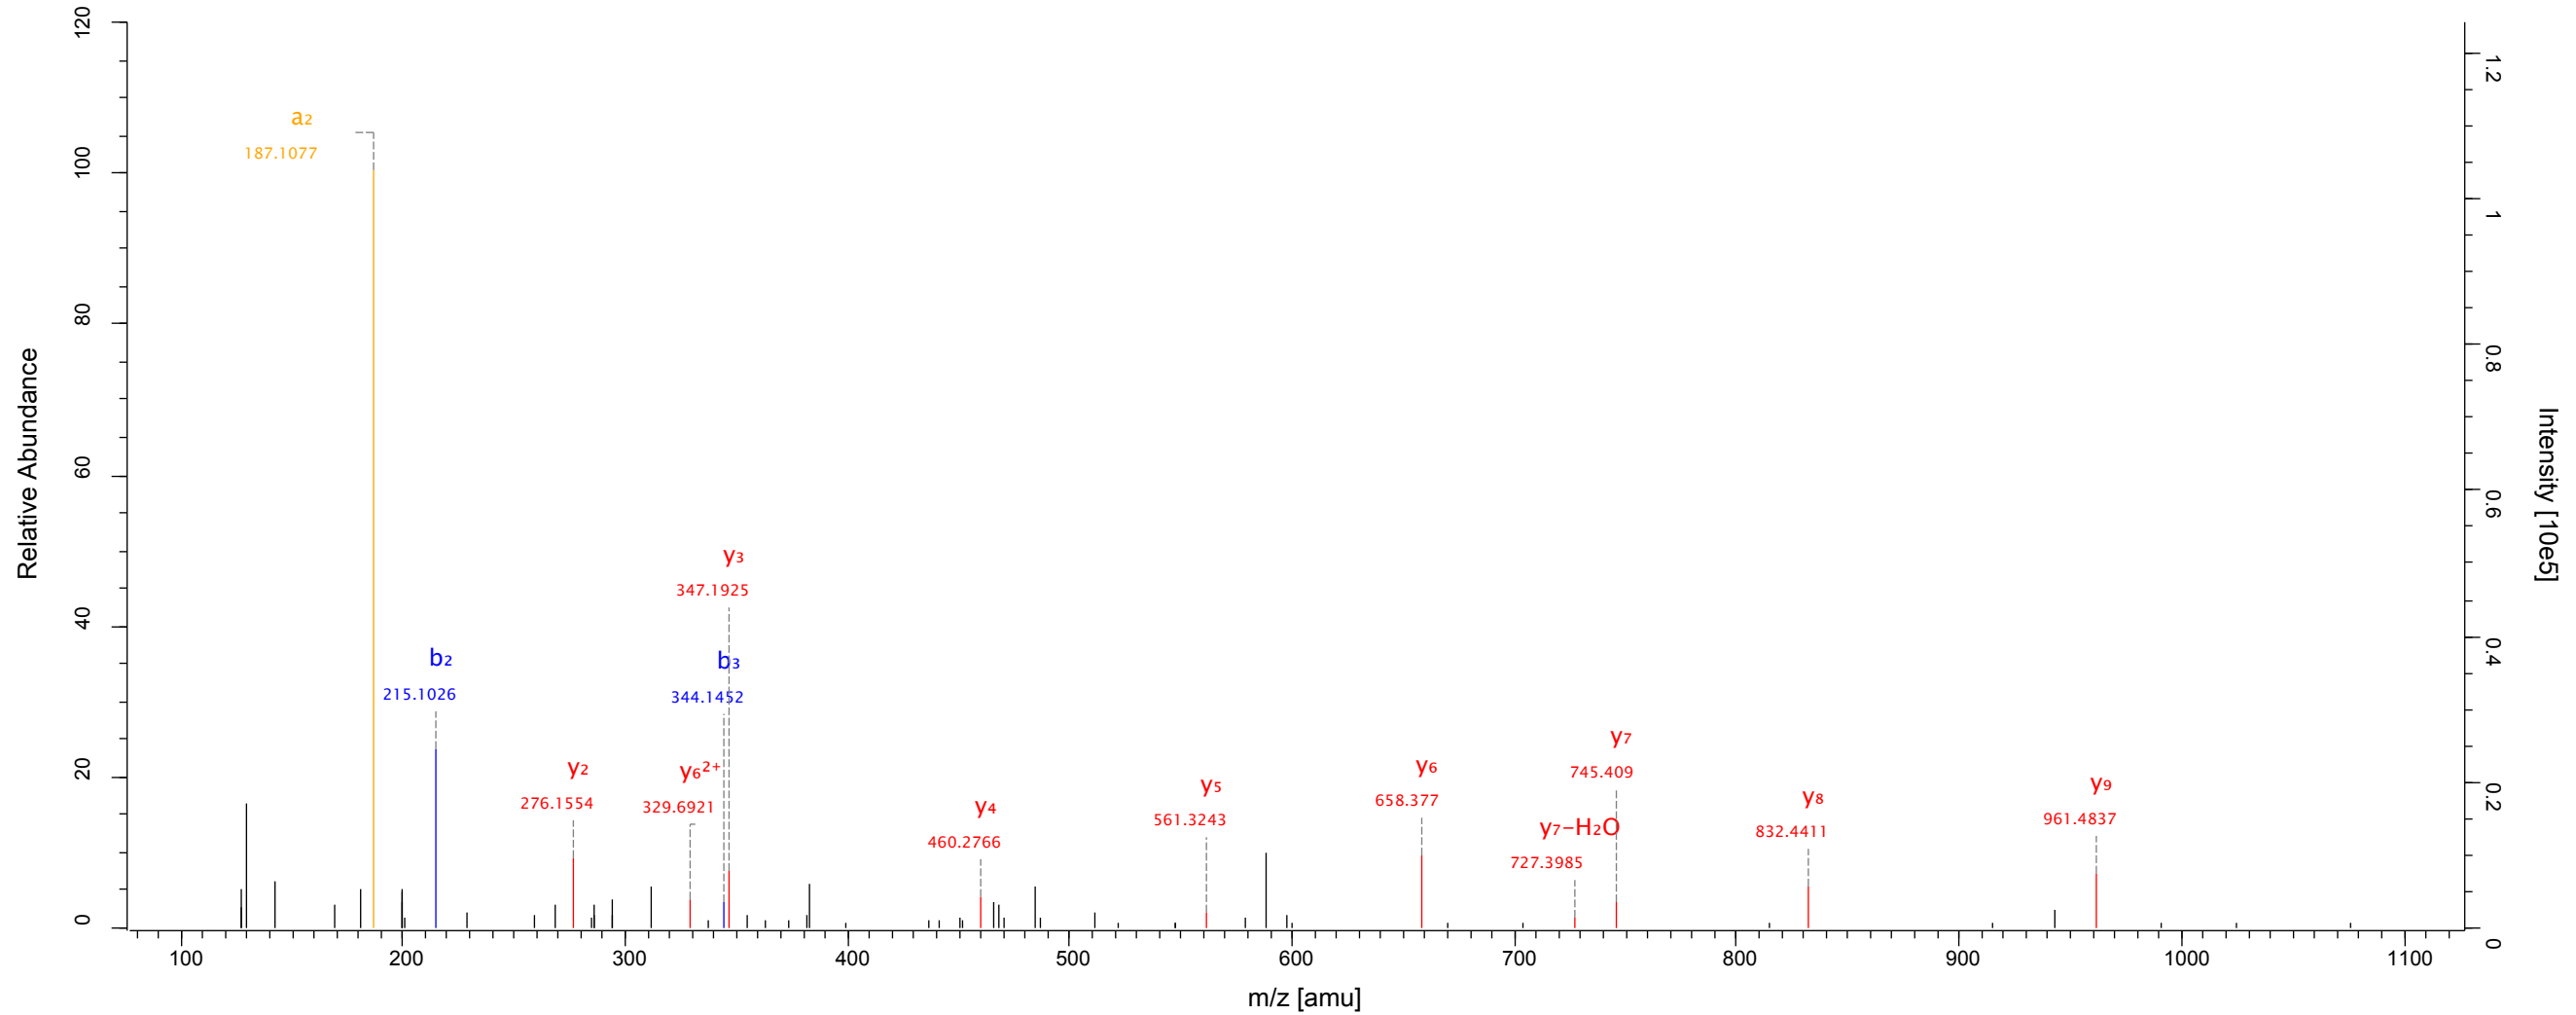

# peptide ID 91

Source: 20121106\_CO\_0340Gaje\_R02\_2  
Scannumber: 8478  
Protein: pep\_secretome\_10230  
Peptide Score: 120.66  
Method: FTMS; HCD; 1

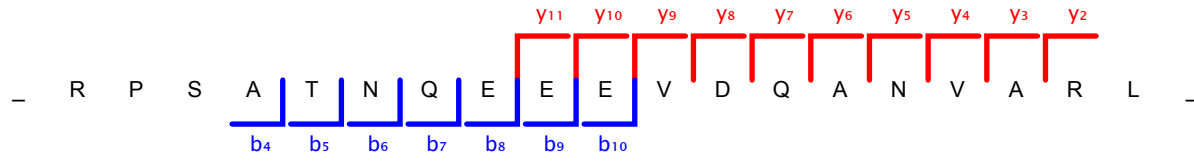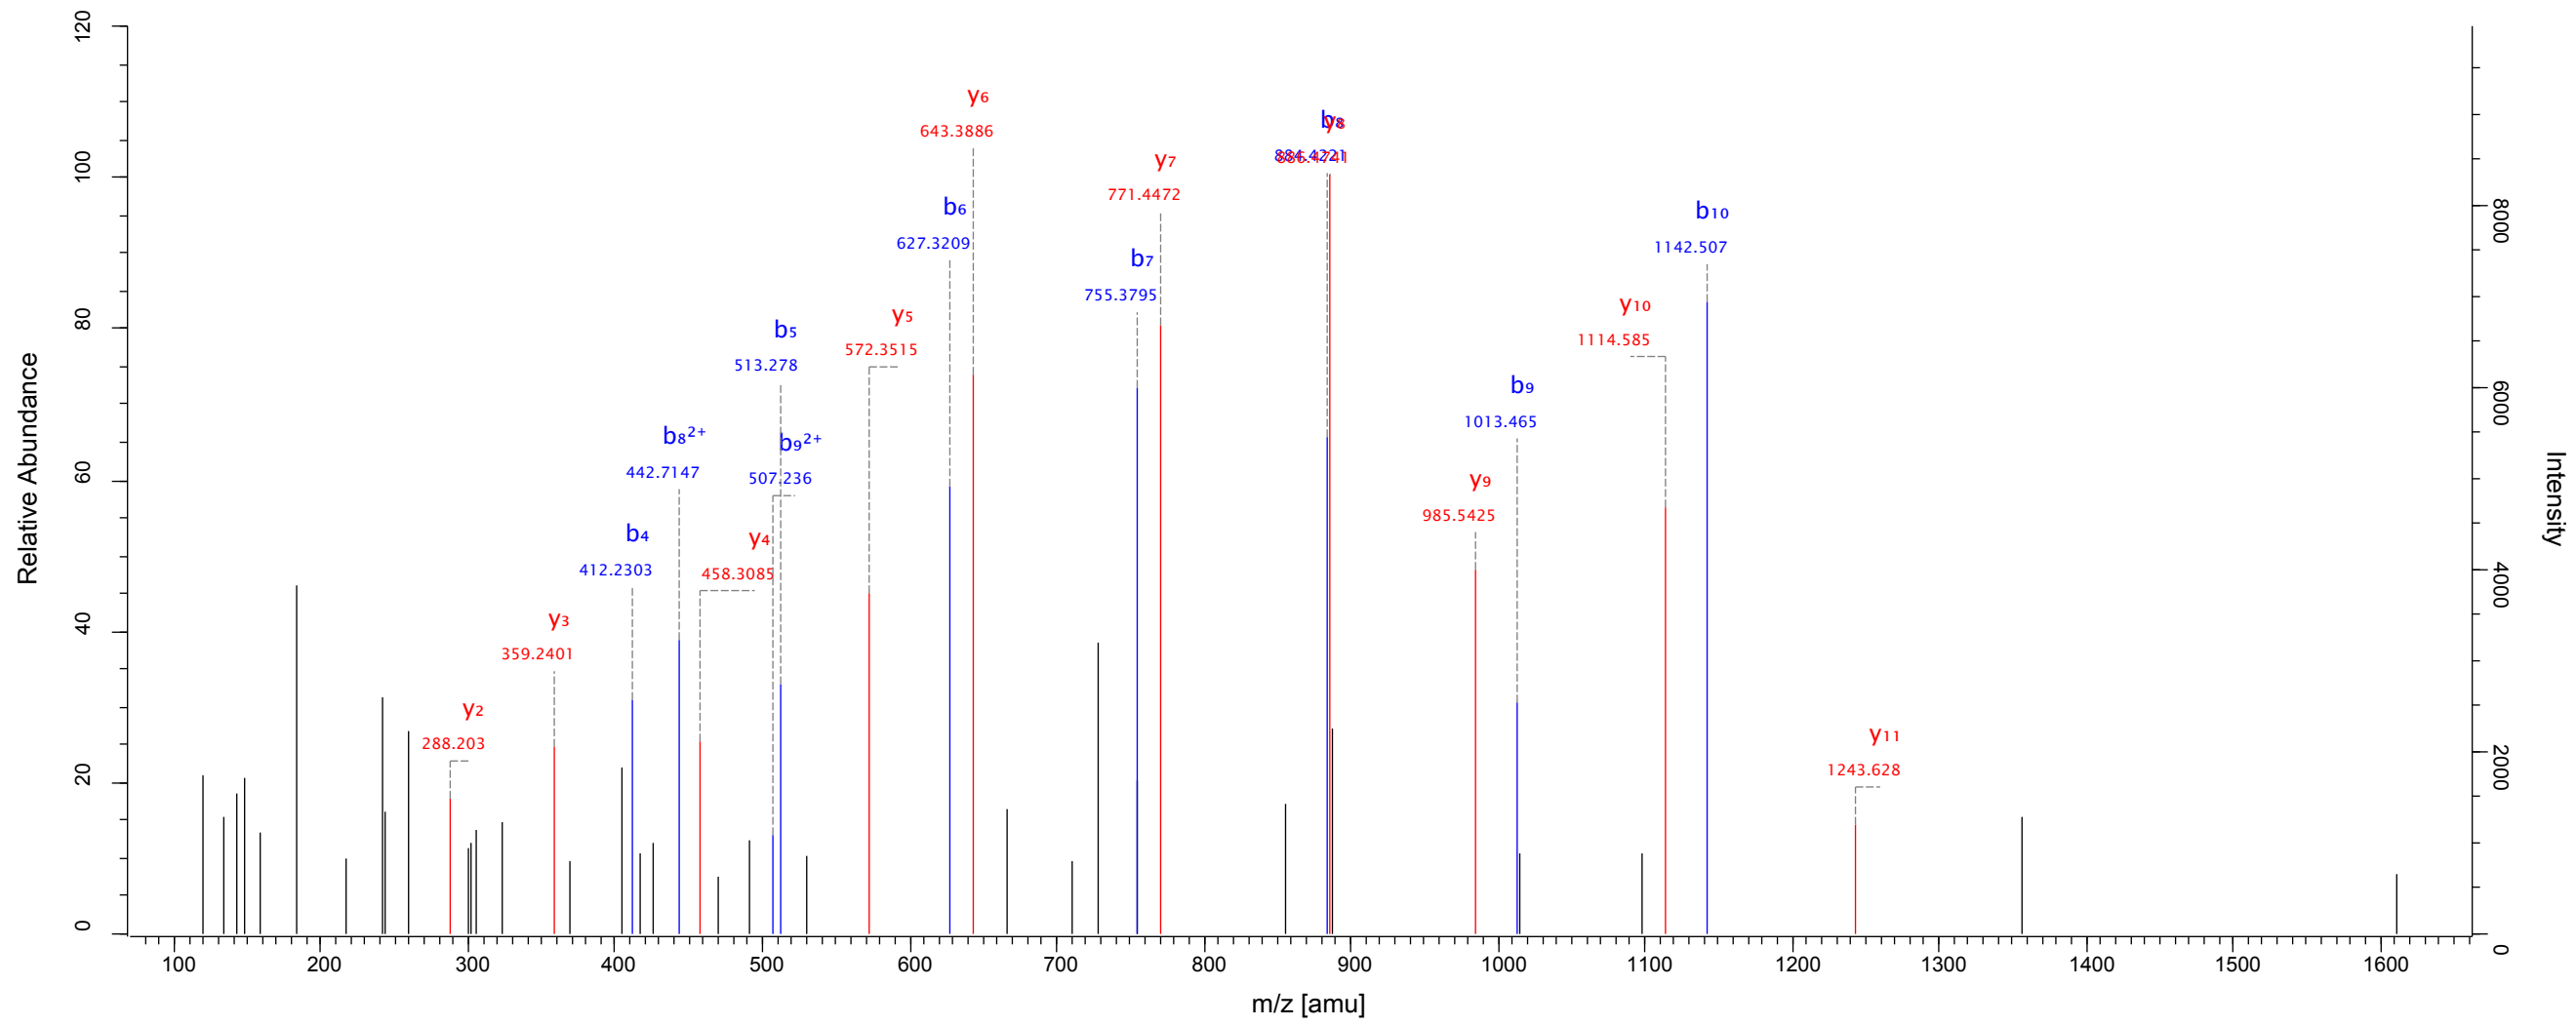

# peptide ID 92

Source: 20120816\_CO\_0340Gaje\_R02  
Scannumber: 15103  
Protein: pep\_102; pep\_secretome\_264  
Peptide Score: 77.12  
Method: FTMS; HCD; 1

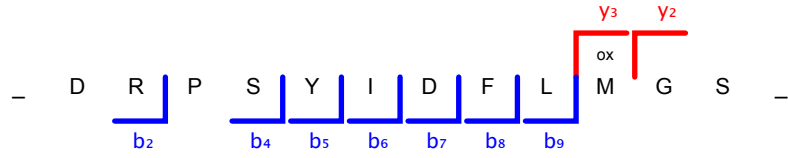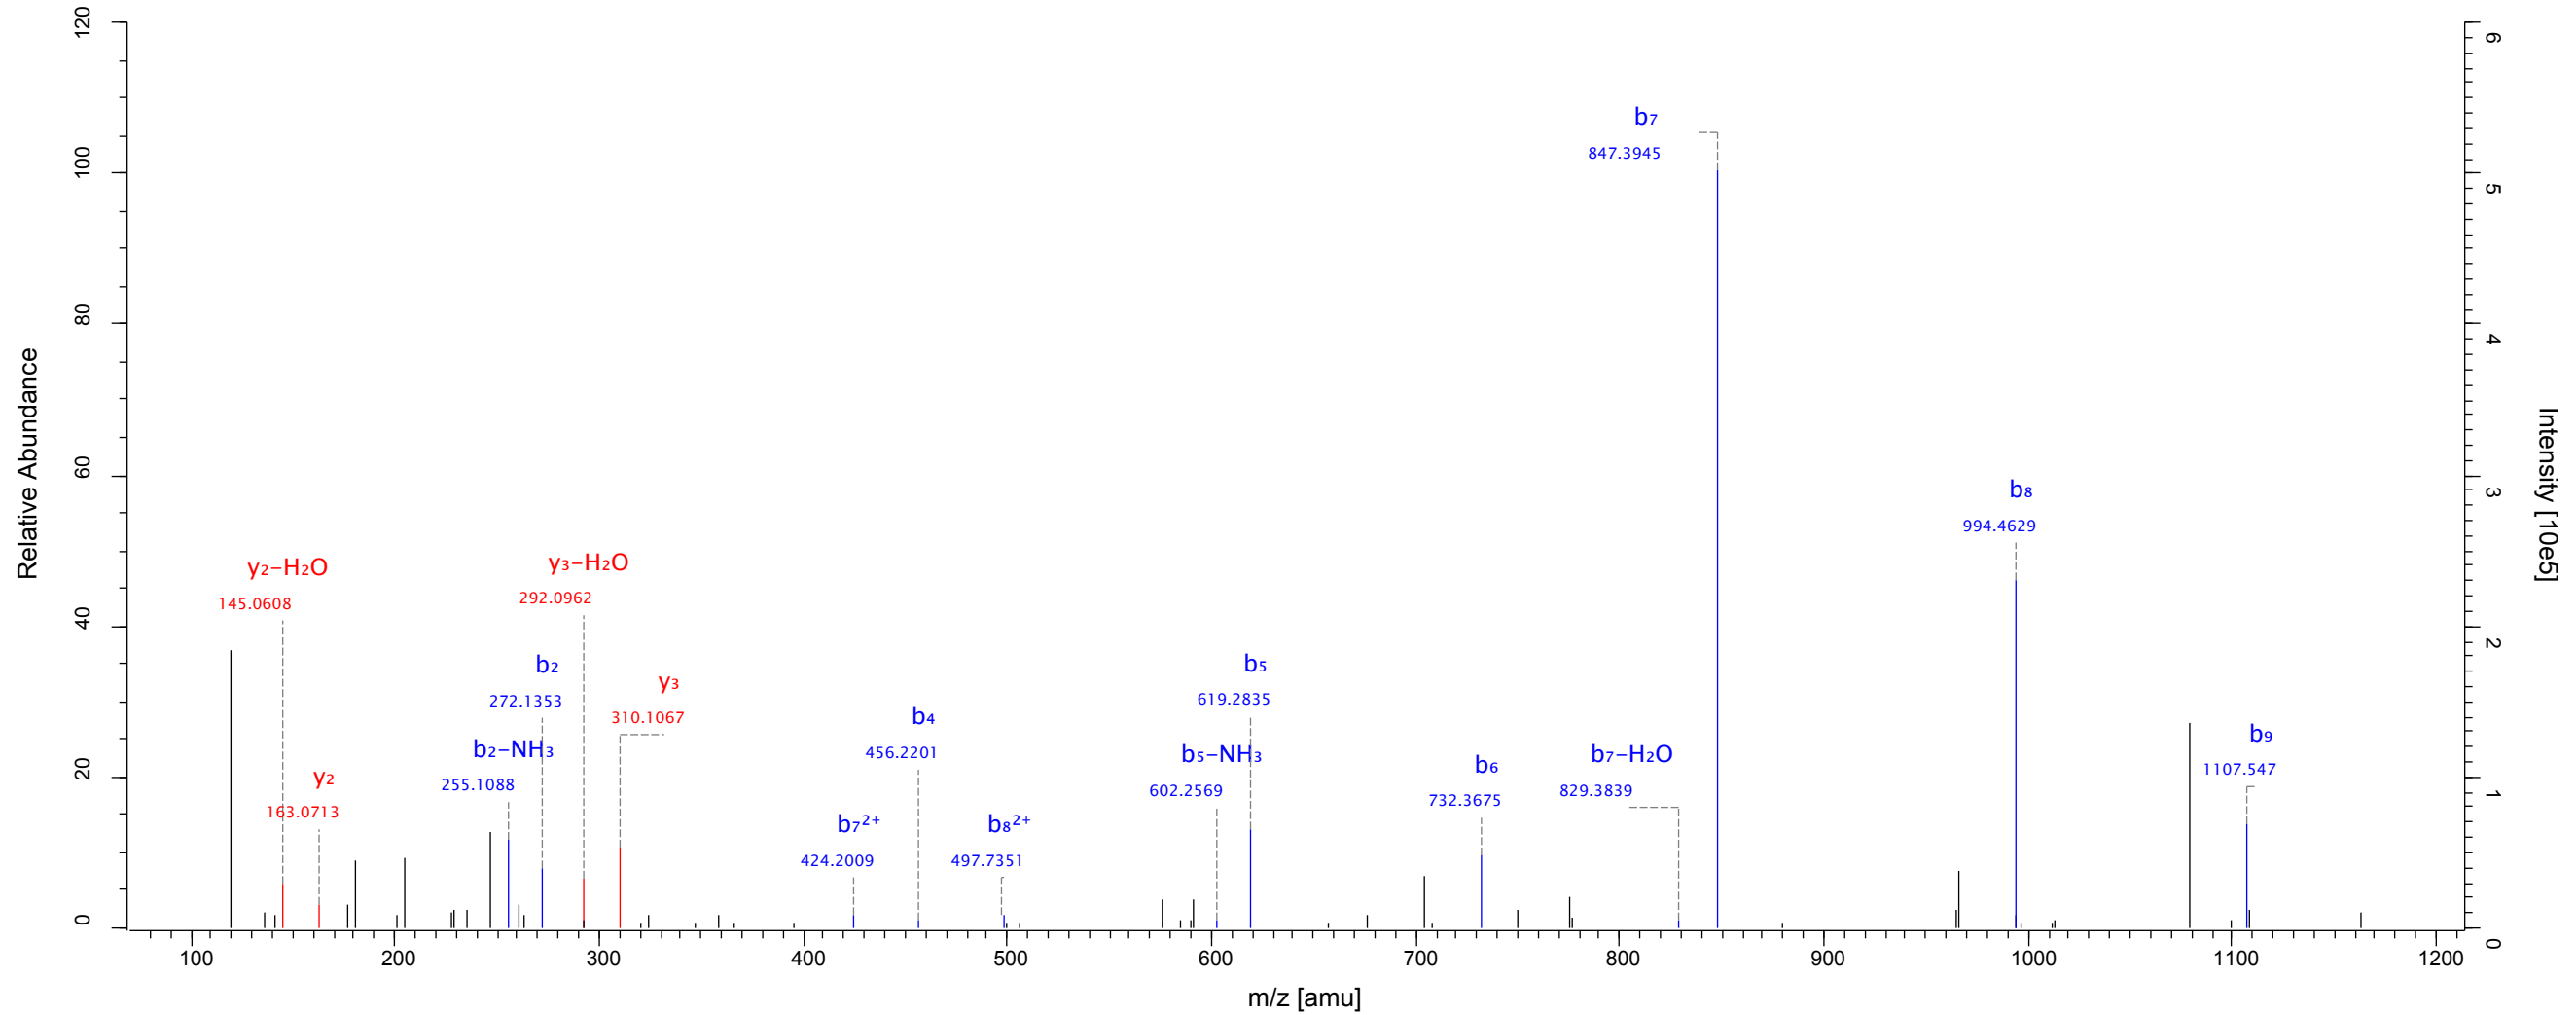





# peptide ID 94

Source: 20121106\_CO\_0340Gaje\_R02\_2  
Scannumber: 14942  
Protein: pep\_105; pep\_secretome\_22968; pep\_secretome\_270  
Peptide Score: 88.09  
Method: FTMS; HCD; 1

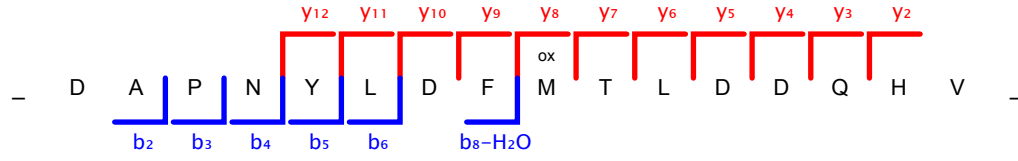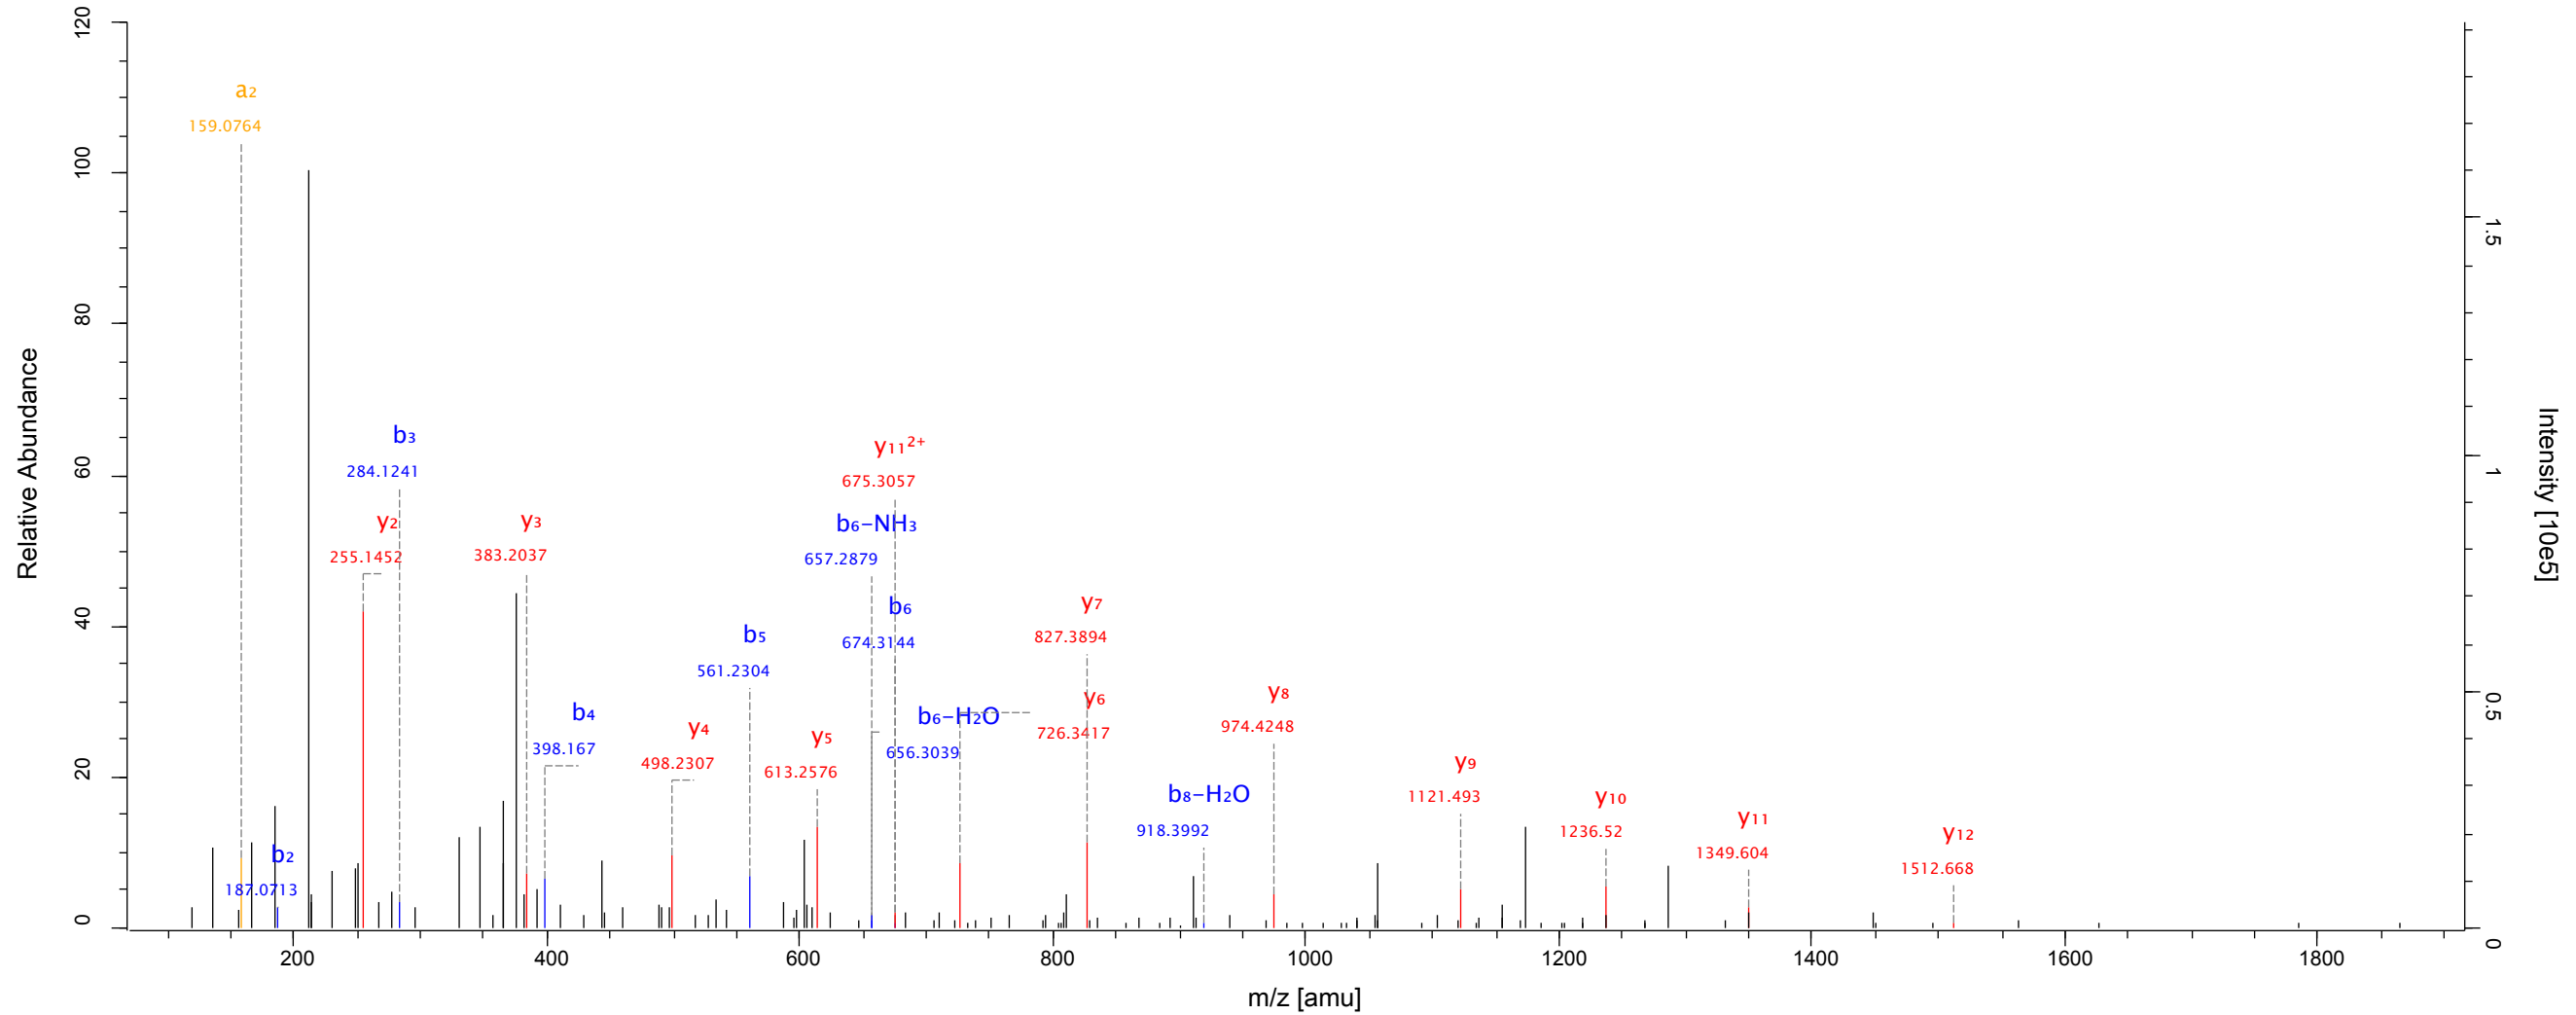

# peptide ID 95

Source: 20121106\_CO\_0340Gaje\_R02\_2  
Scannumber: 9715  
Protein: pep\_108; pep\_secretome\_274  
Peptide Score: 84.29  
Method: FTMS; HCD; 1

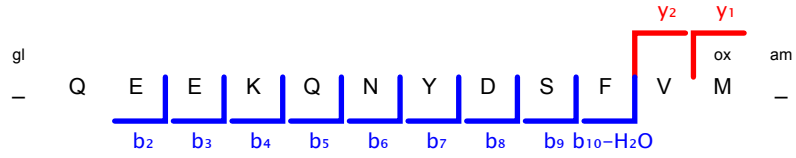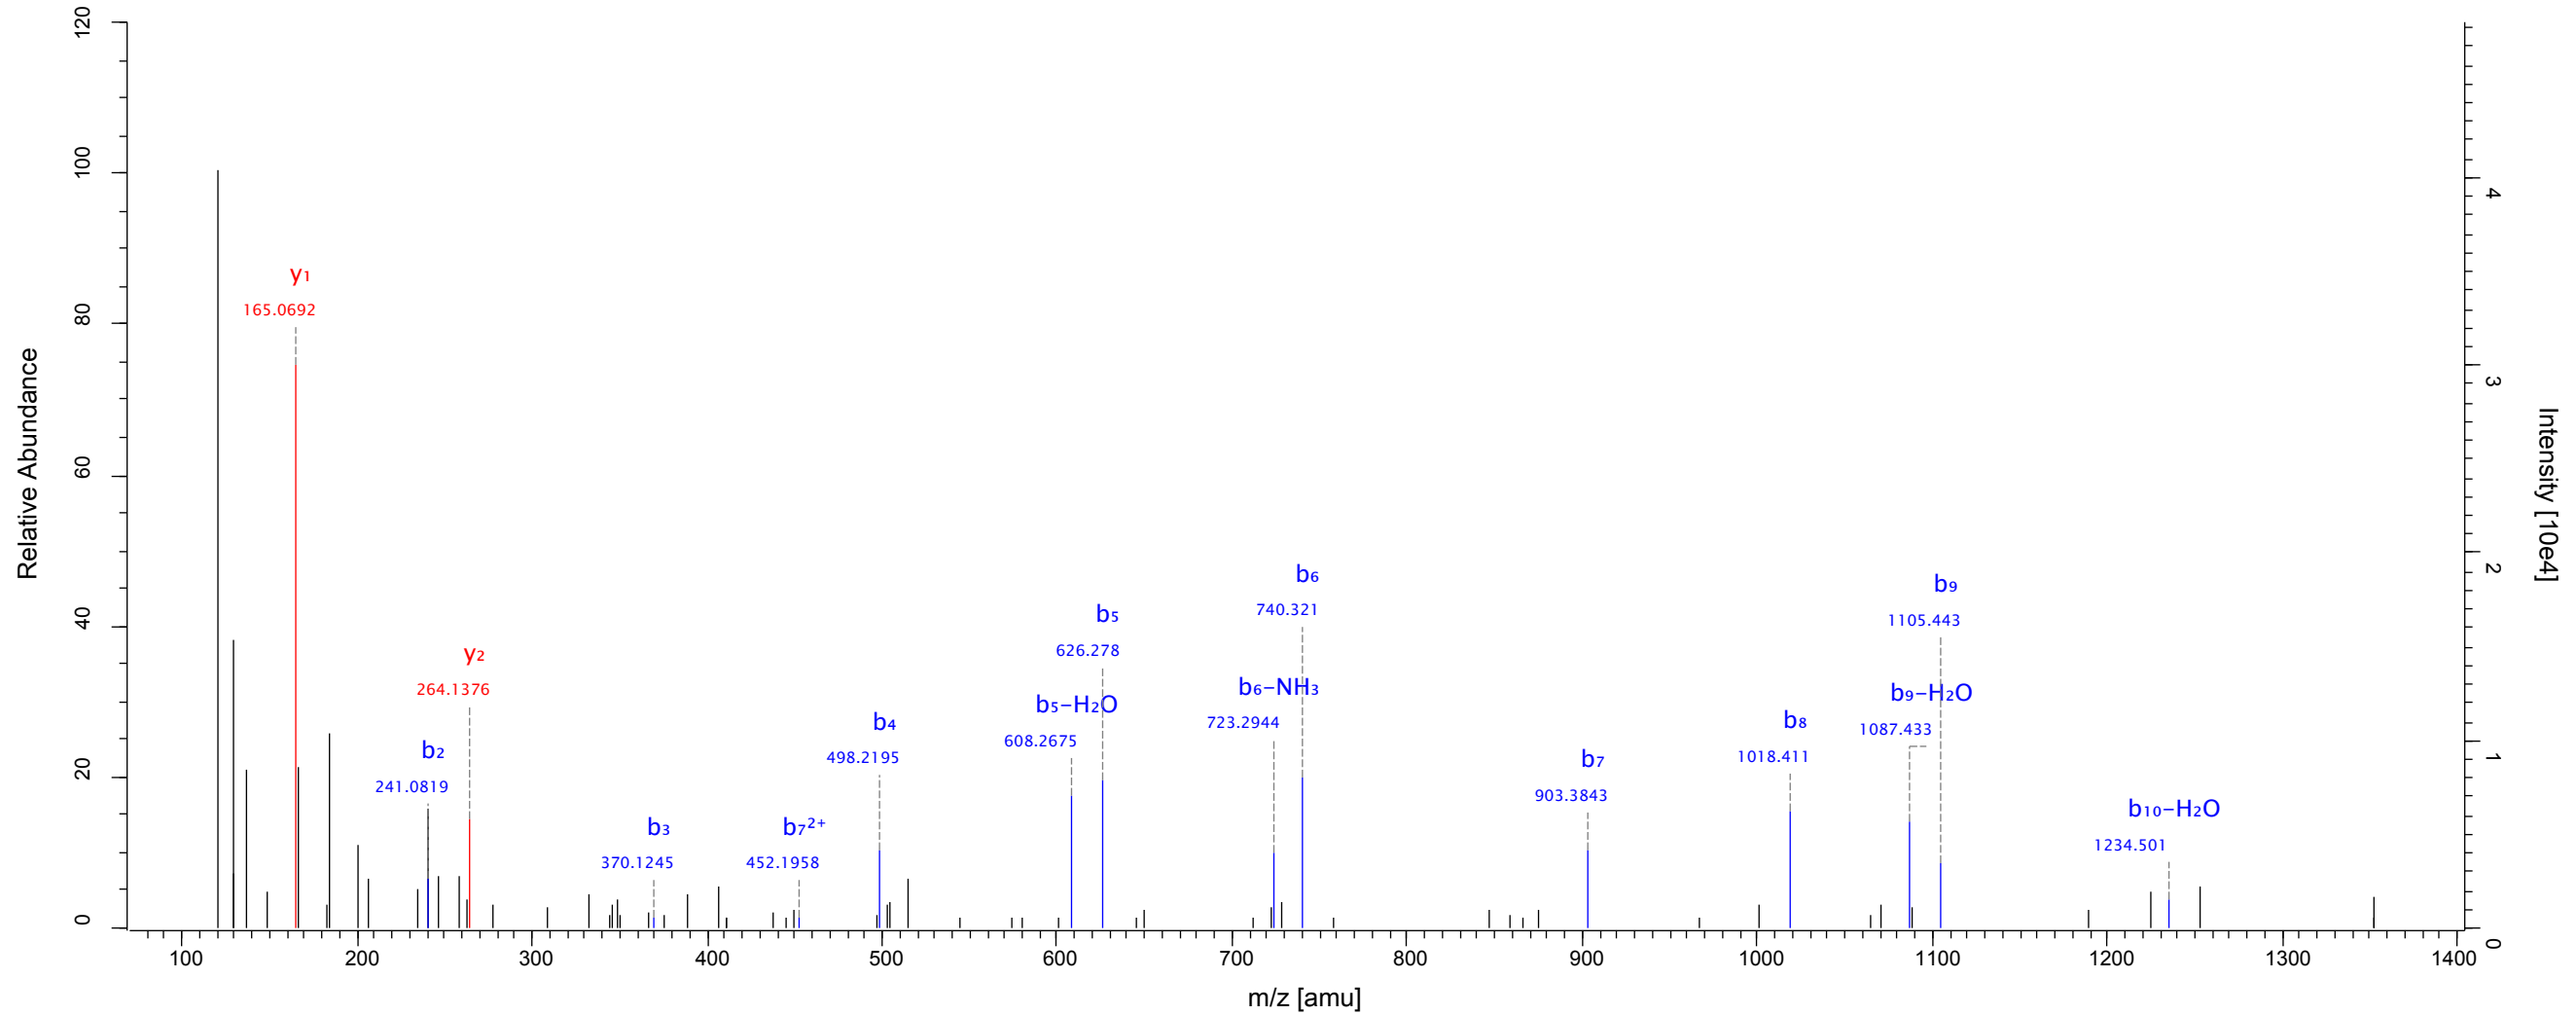

# peptide ID 96

Source: 20120816\_CO\_0340Gaje\_R02  
Scannumber: 8137  
Protein: pep\_108; pep\_secretome\_274  
Peptide Score: 62.47  
Method: FTMS; HCD; 1

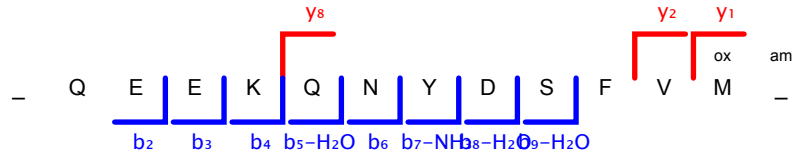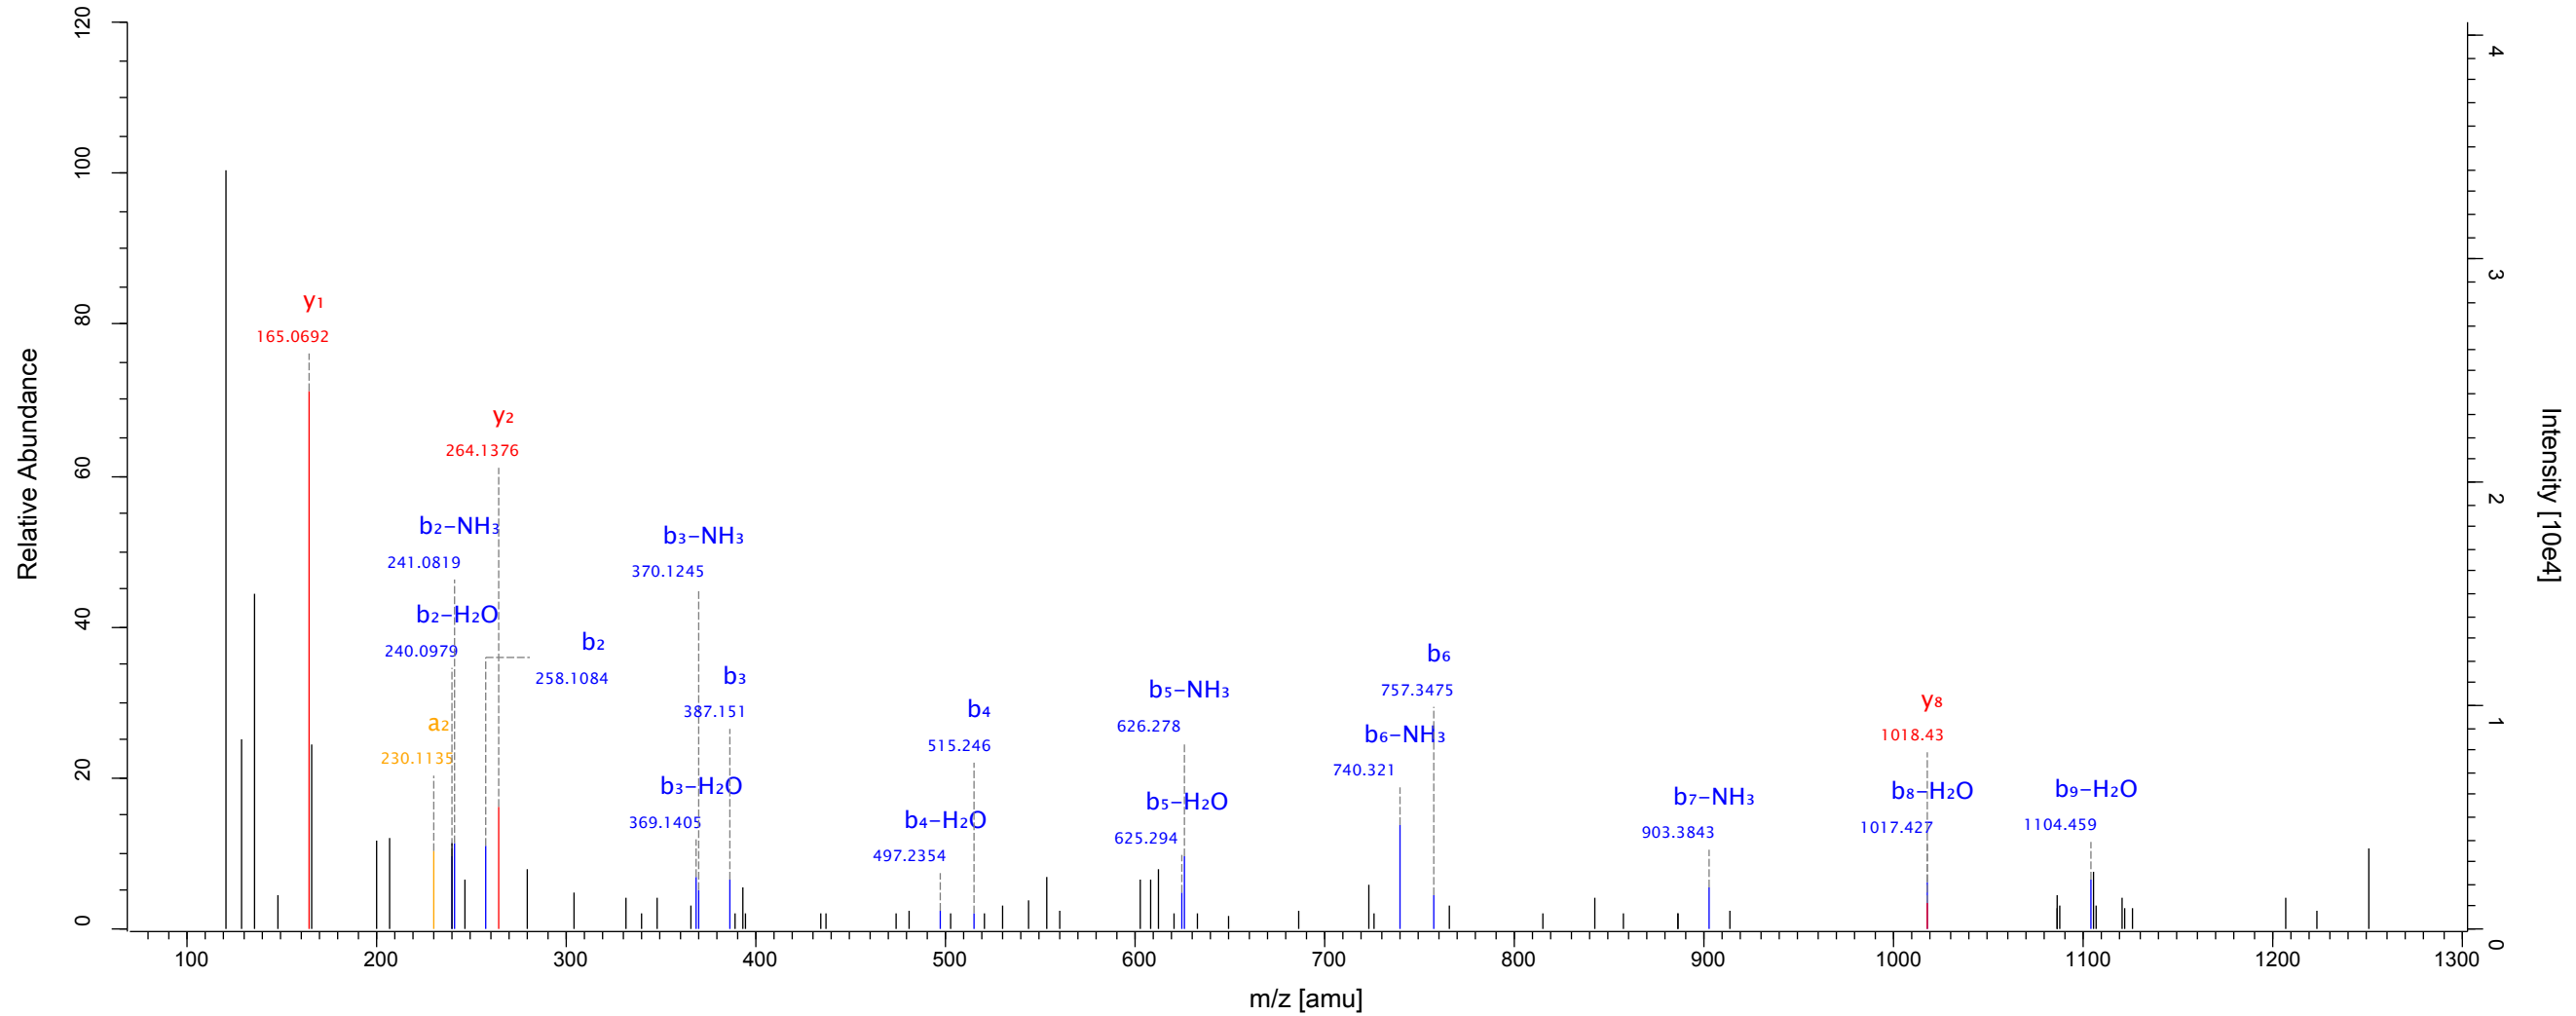

# peptide ID 97

Source: 20120816\_CO\_0340Gaje\_R02  
Scannumber: 7890  
Protein: pep\_secretome\_276  
Peptide Score: 103.7  
Method: FTMS; HCD; 1

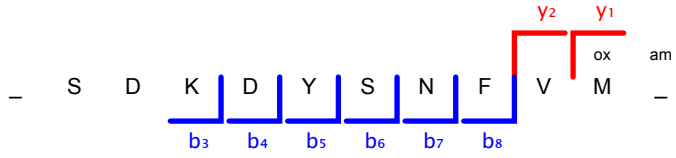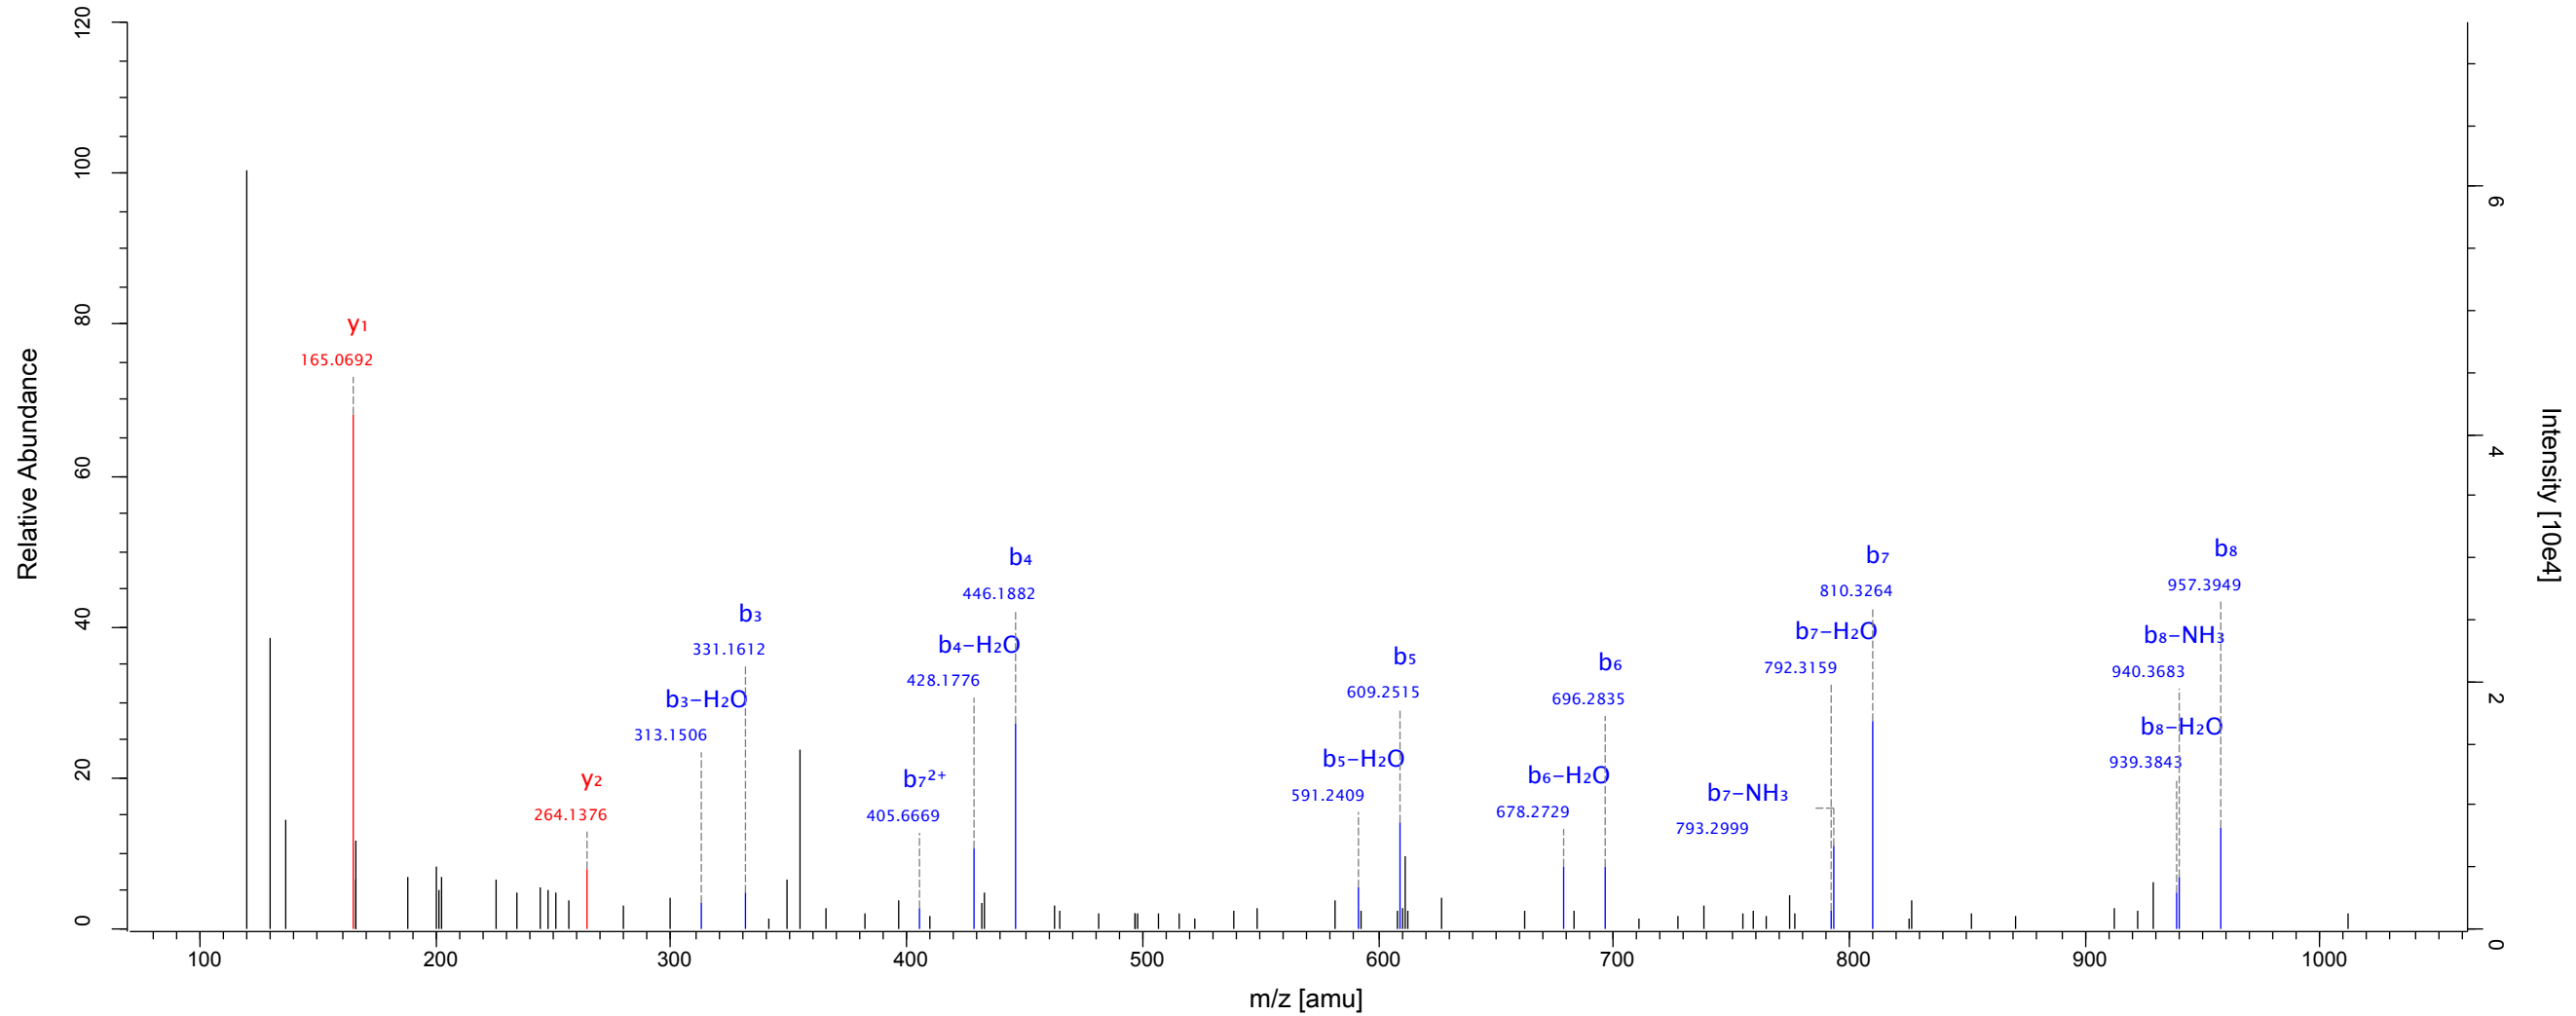

# peptide ID 98

Source: 20120816\_CO\_0340Gaje\_R02  
Scannumber: 7903  
Protein: pep\_secretome\_279  
Peptide Score: 111.61  
Method: FTMS; HCD; 1

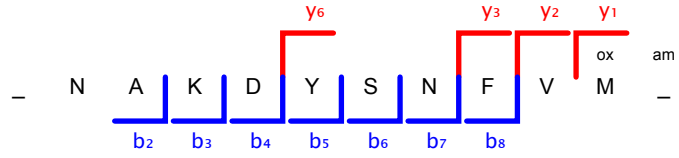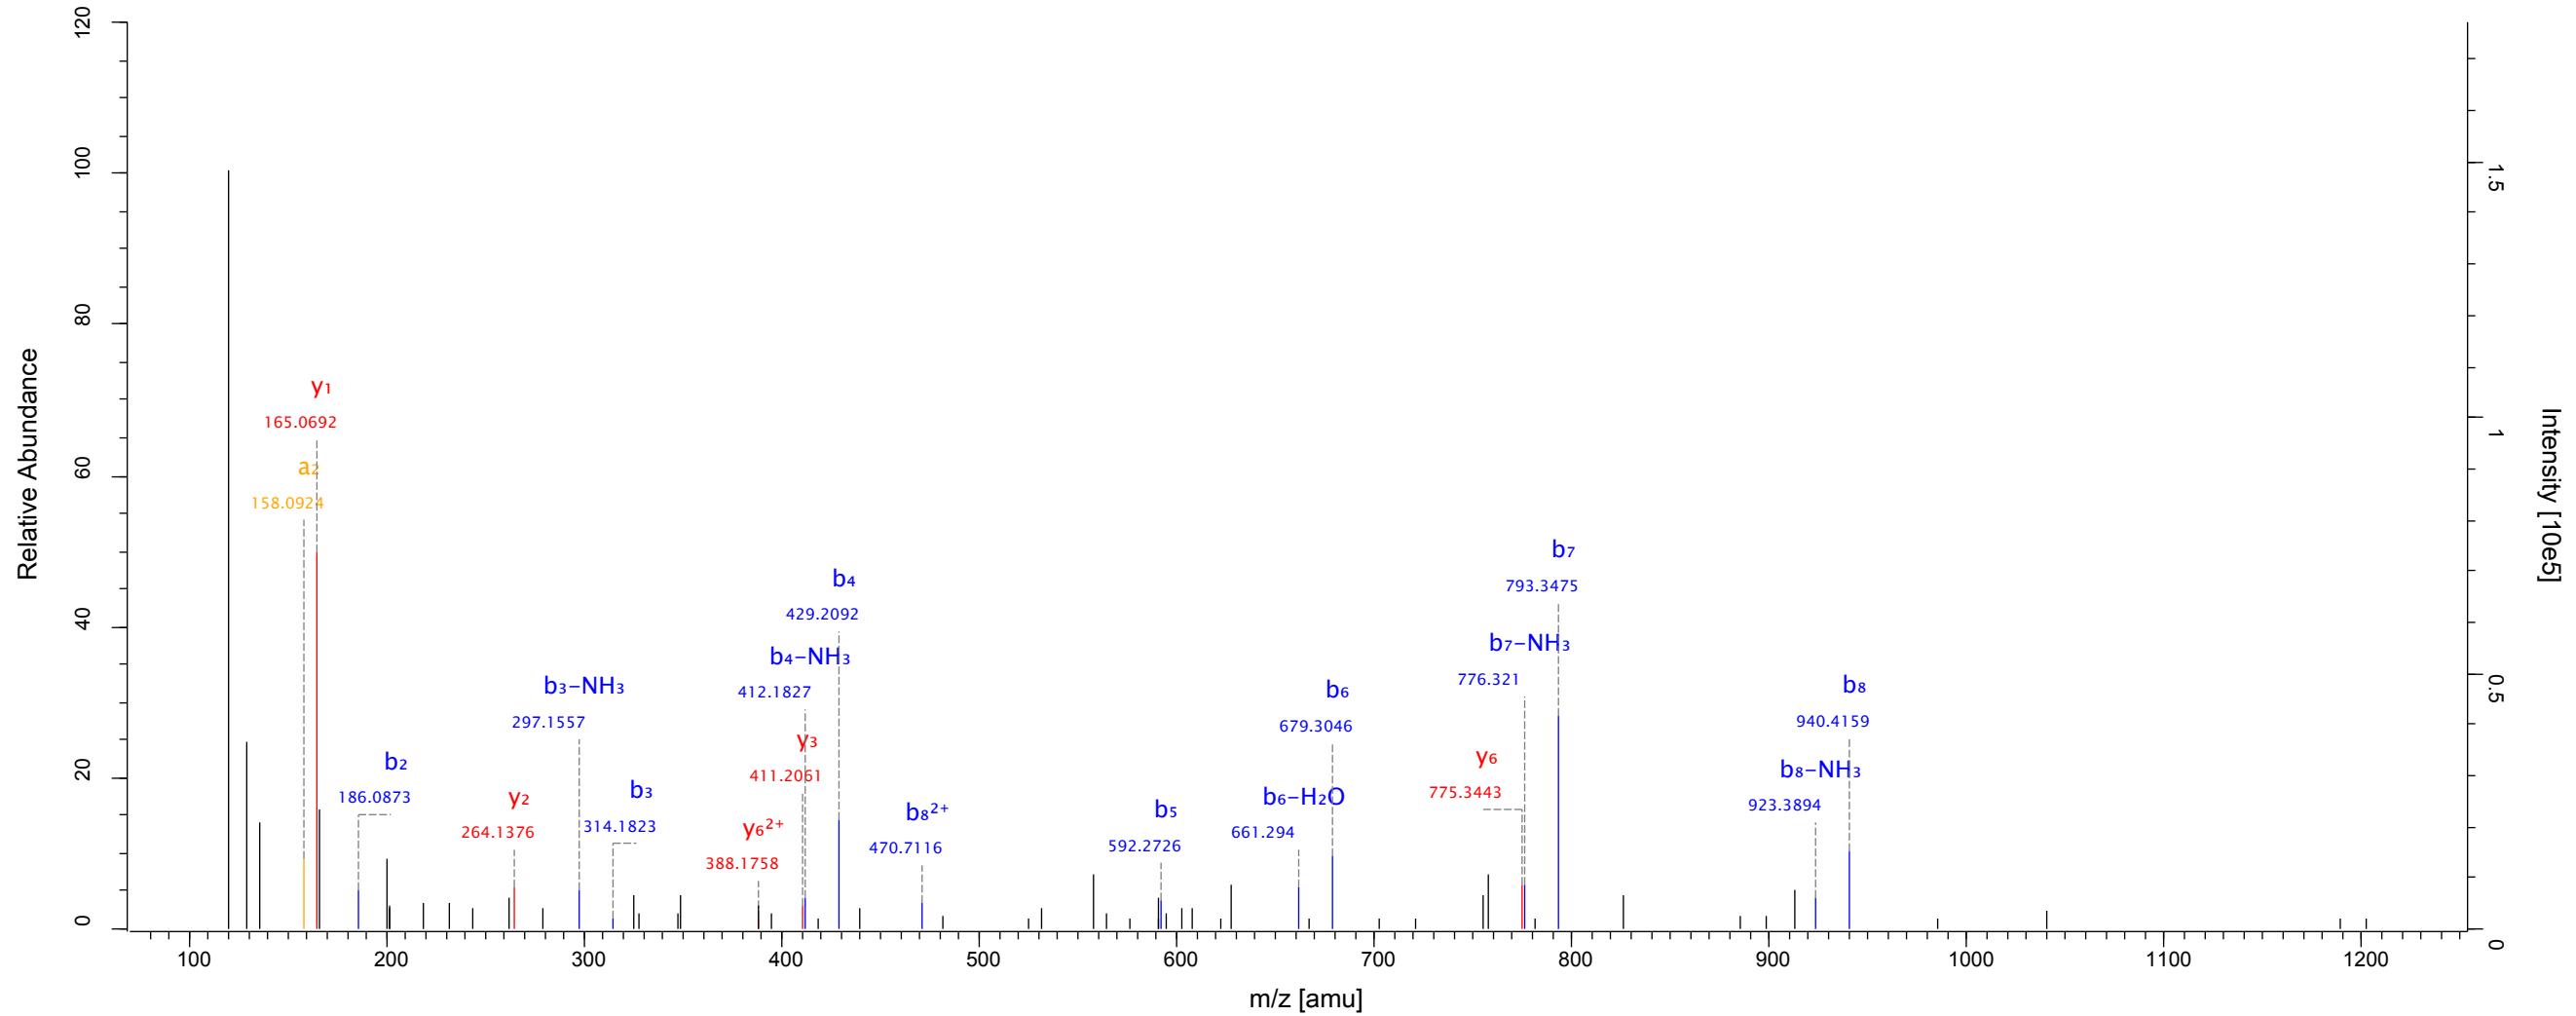

# peptide ID 99

Source: 20120816\_CO\_0340Gaje\_R02  
Scannumber: 9127  
Protein: pep\_secretome\_413; pep\_secretome\_414; pep\_secretome\_419  
Peptide Score: 119.17  
Method: FTMS; HCD; 1

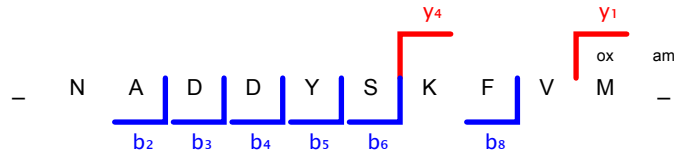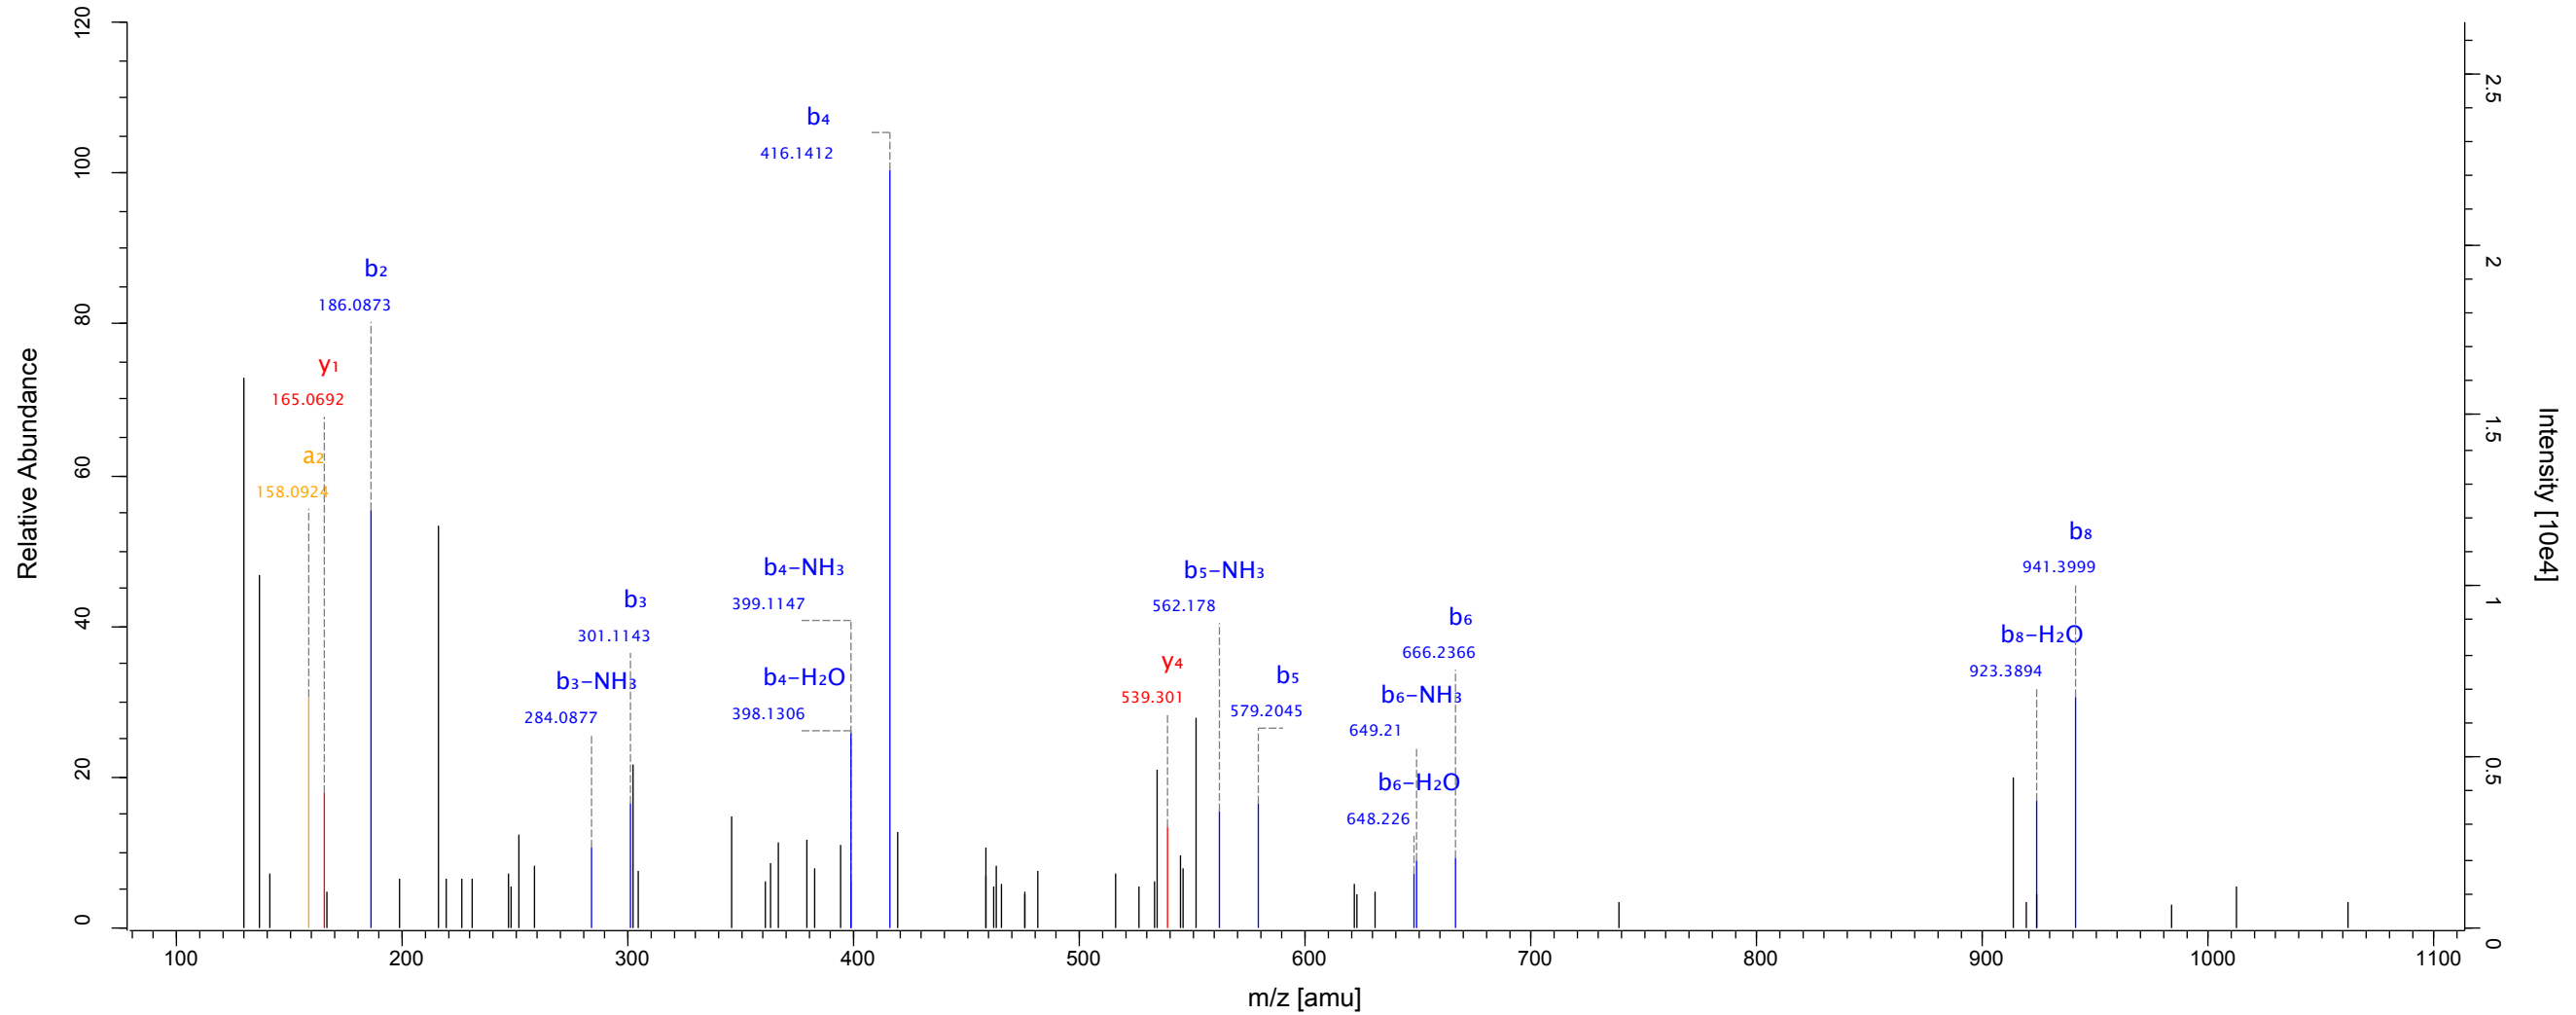

# peptide ID 100

Source: 20121106\_CO\_0340Gaje\_R02\_2

Scannumber: 10162

Protein: pep\_secretome\_281; pep\_secretome\_282; pep\_secretome\_415; pep\_secretome\_418; pep\_secretome\_421; pep\_secretome\_424; pep\_secretome\_427; pep\_secretome\_428

Peptide Score: 131.45

Method: FTMS; HCD; 1

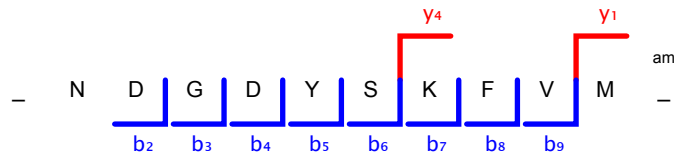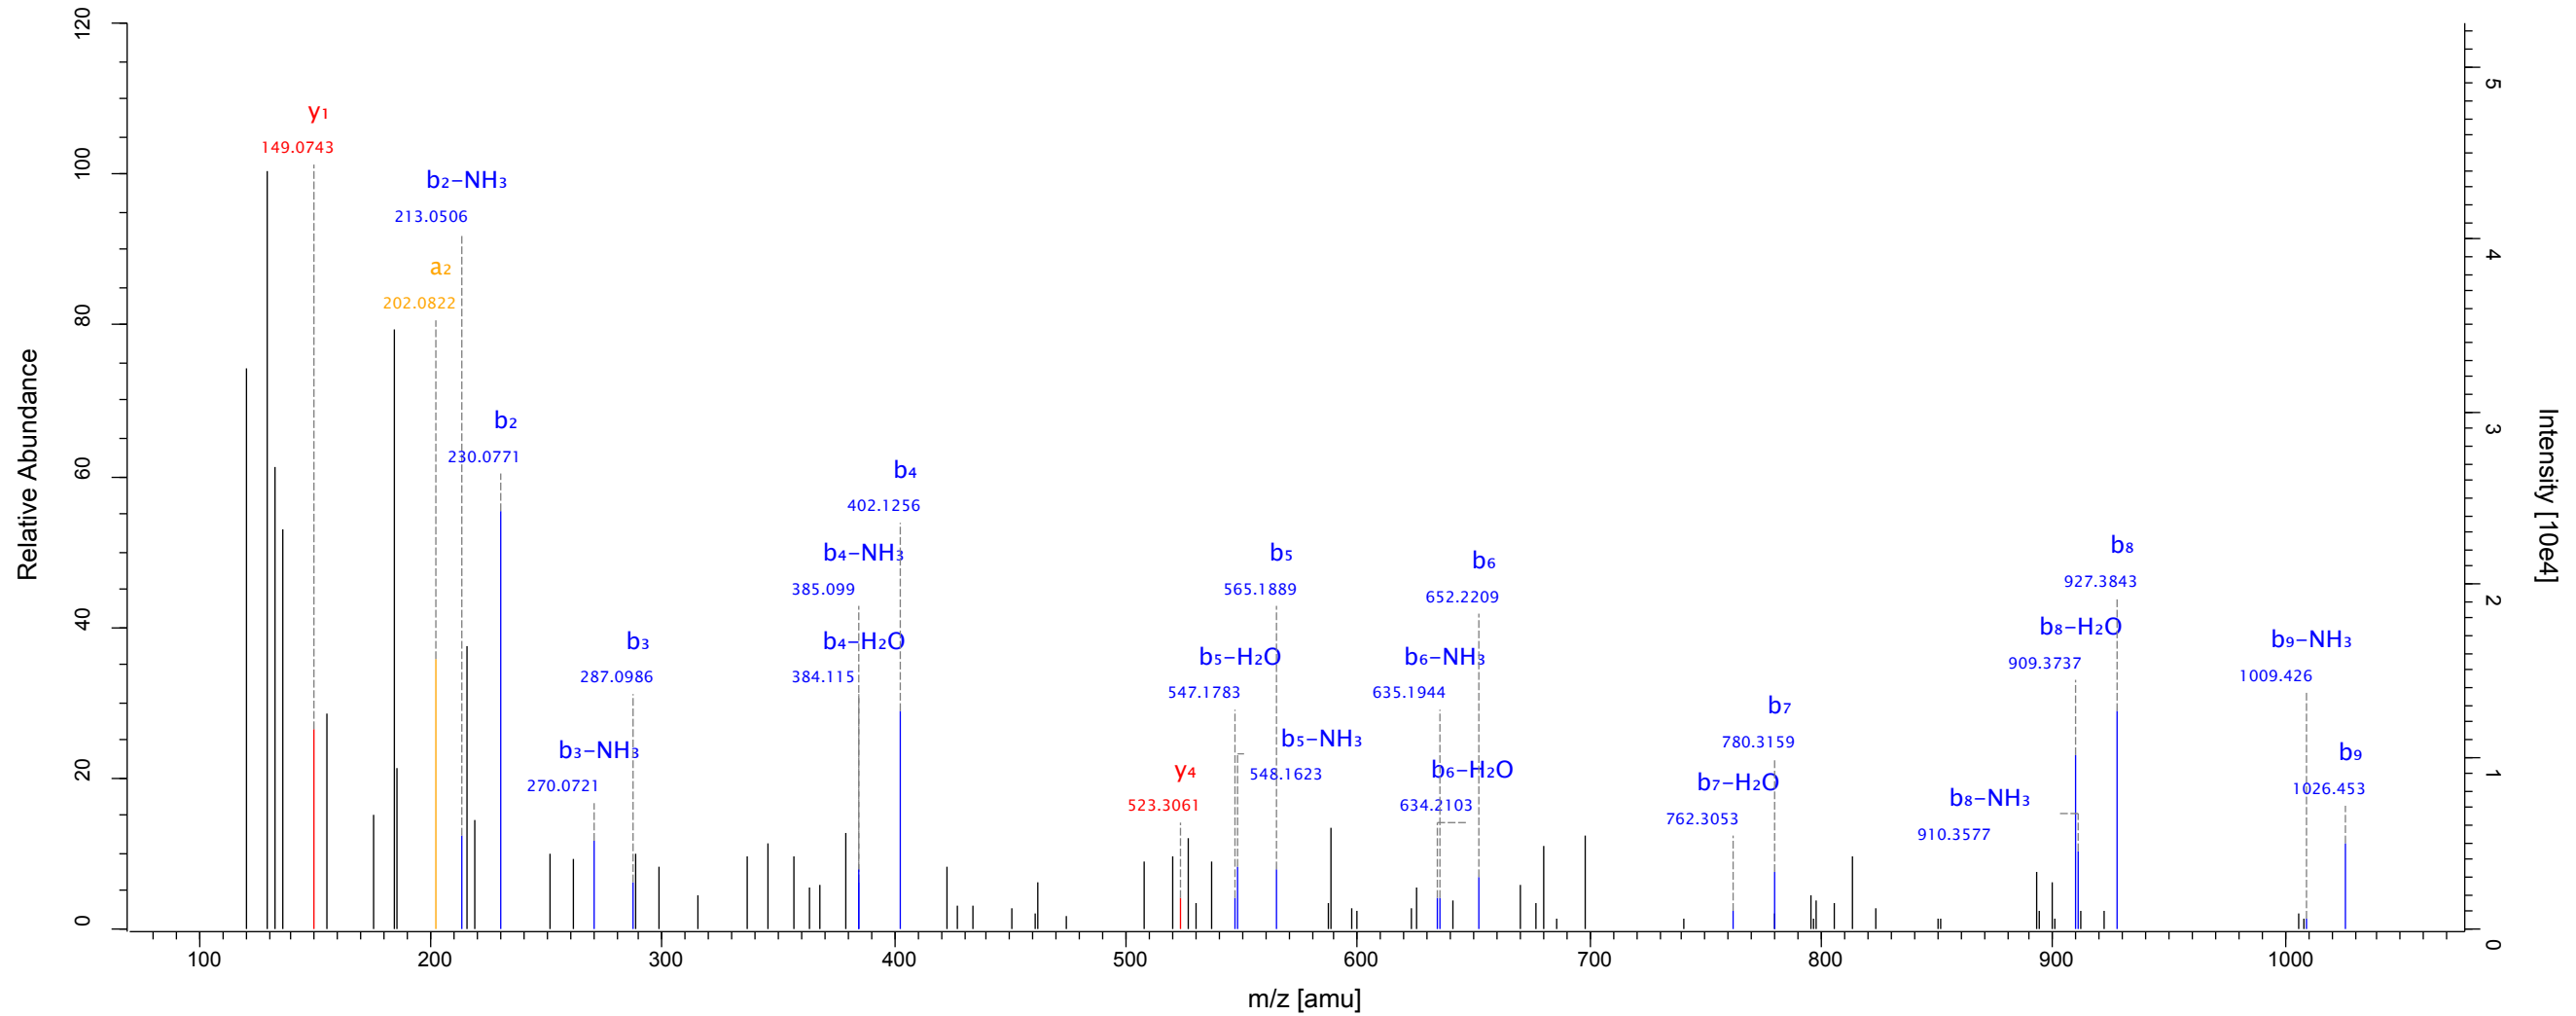



# peptide ID 101

Source: 20120816\_CO\_0340Gaje\_R02  
Scannumber: 8400  
Protein: pep\_secretome\_281; pep\_secretome\_282; pep\_secretome\_415; pep\_secretome\_418; pep\_secretome\_421; pep\_secretome\_424; pep\_secretome\_427; pep\_secretome\_428  
Peptide Score: 111.74  
Method: FTMS; HCD; 1

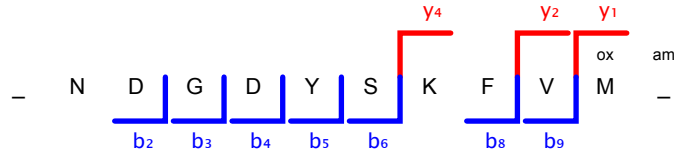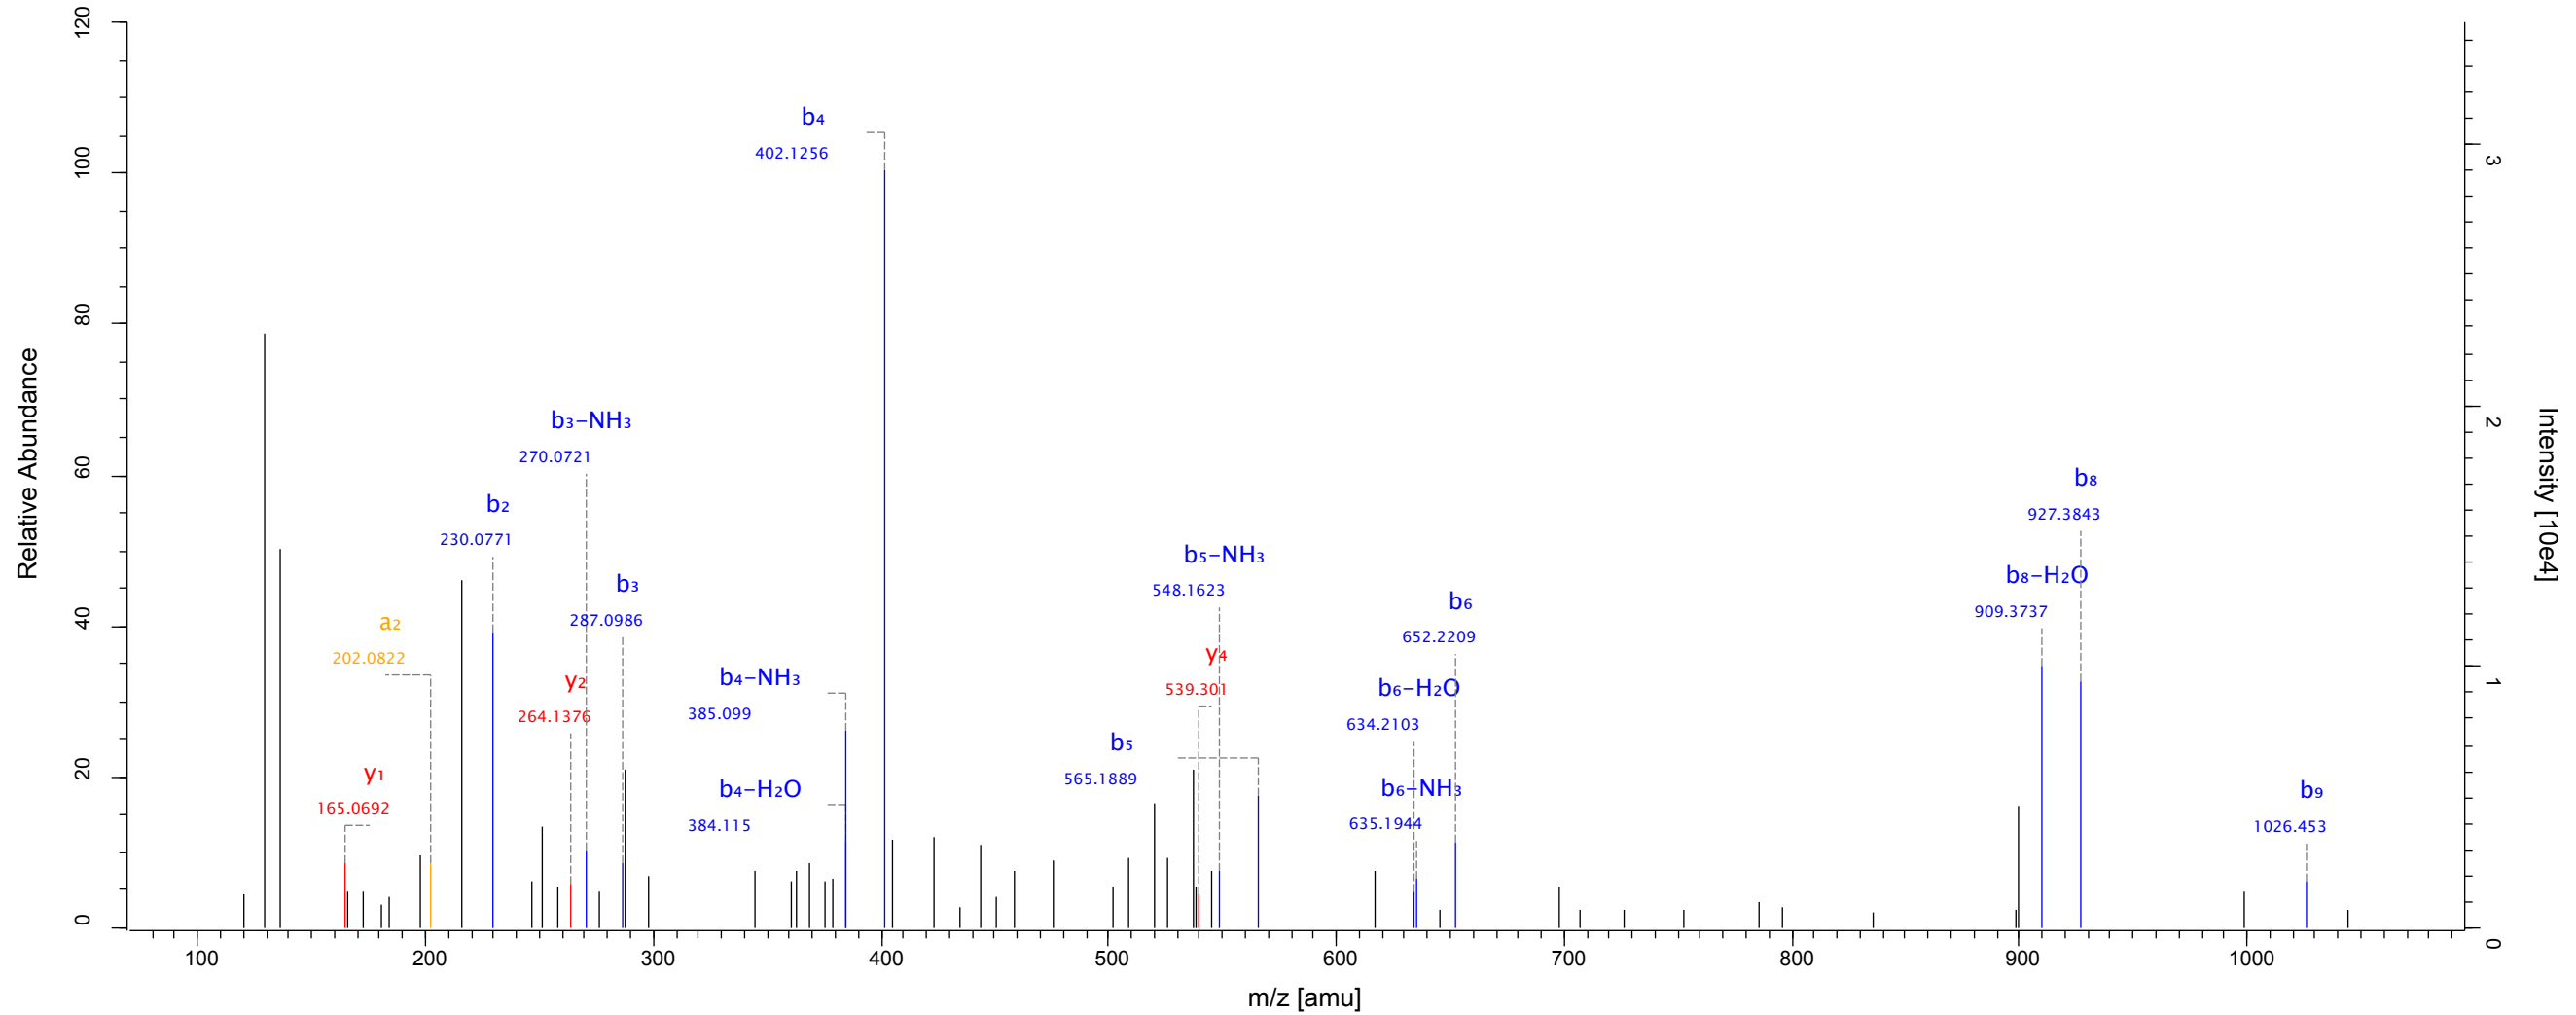

# peptide ID 102

Source: 20121106\_CO\_0340Gaje\_R02\_2  
Scannumber: 8224  
Protein: pep\_secretome\_285; pep\_secretome\_425  
Peptide Score: 138.08  
Method: FTMS; HCD; 1

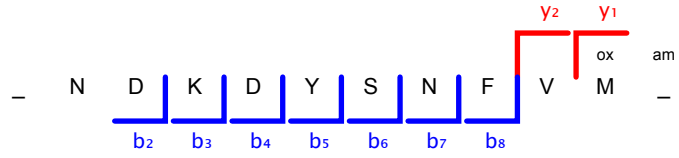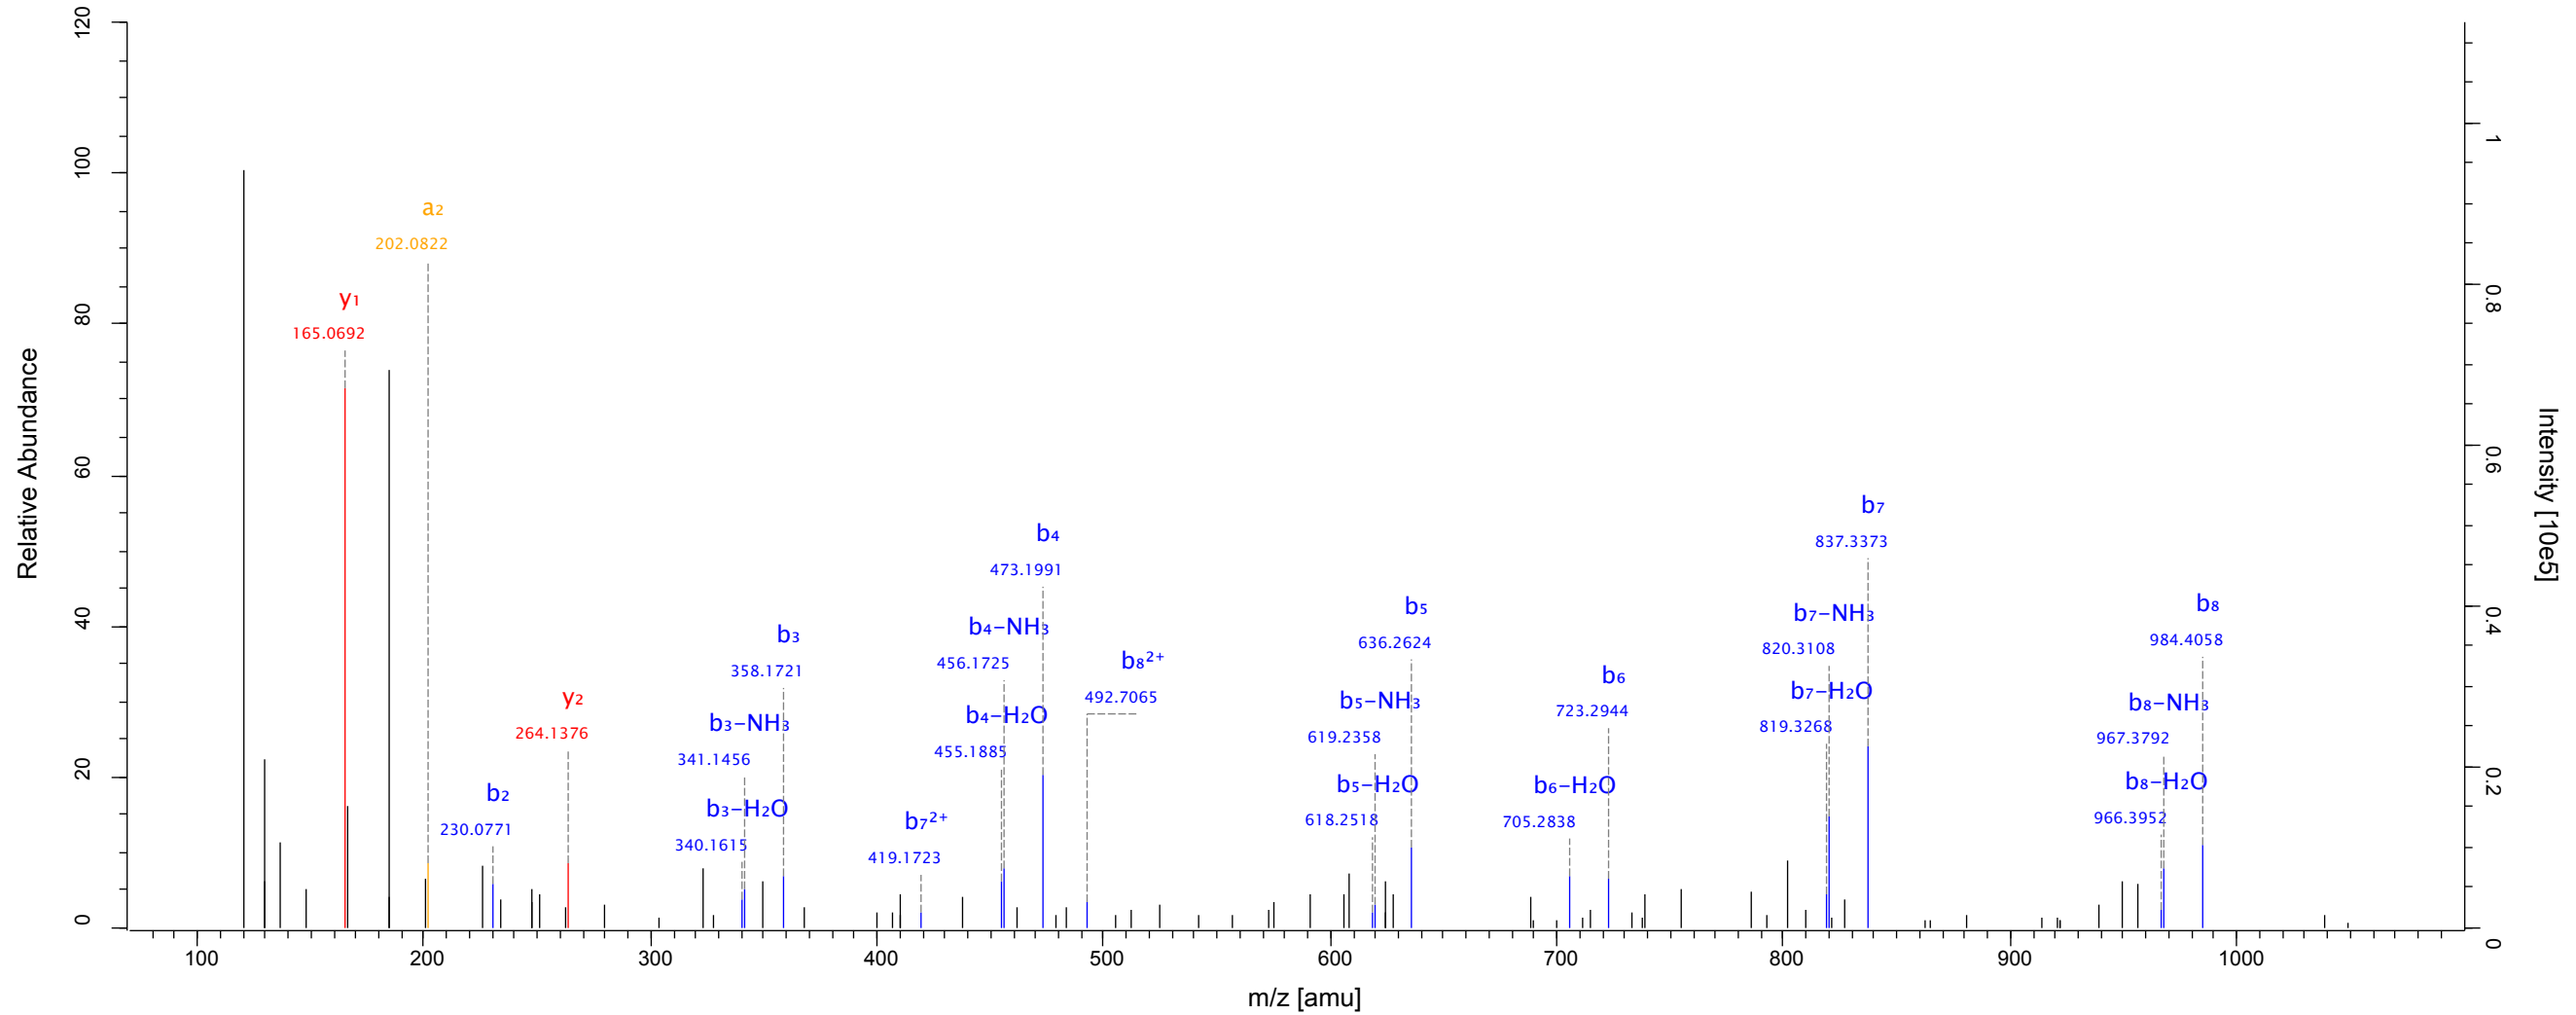

# peptide ID 103

Source: 20120816\_CO\_0340Gaje\_R02  
Scannumber: 9316  
Protein: pep\_163; pep\_secretome\_23298; pep\_secretome\_432  
Peptide Score: 79.63  
Method: FTMS; HCD; 1

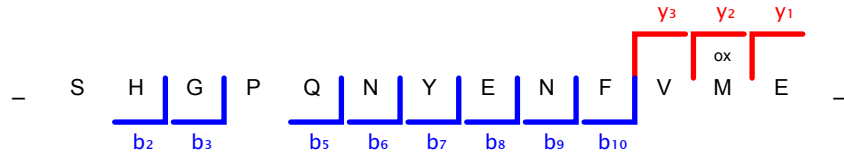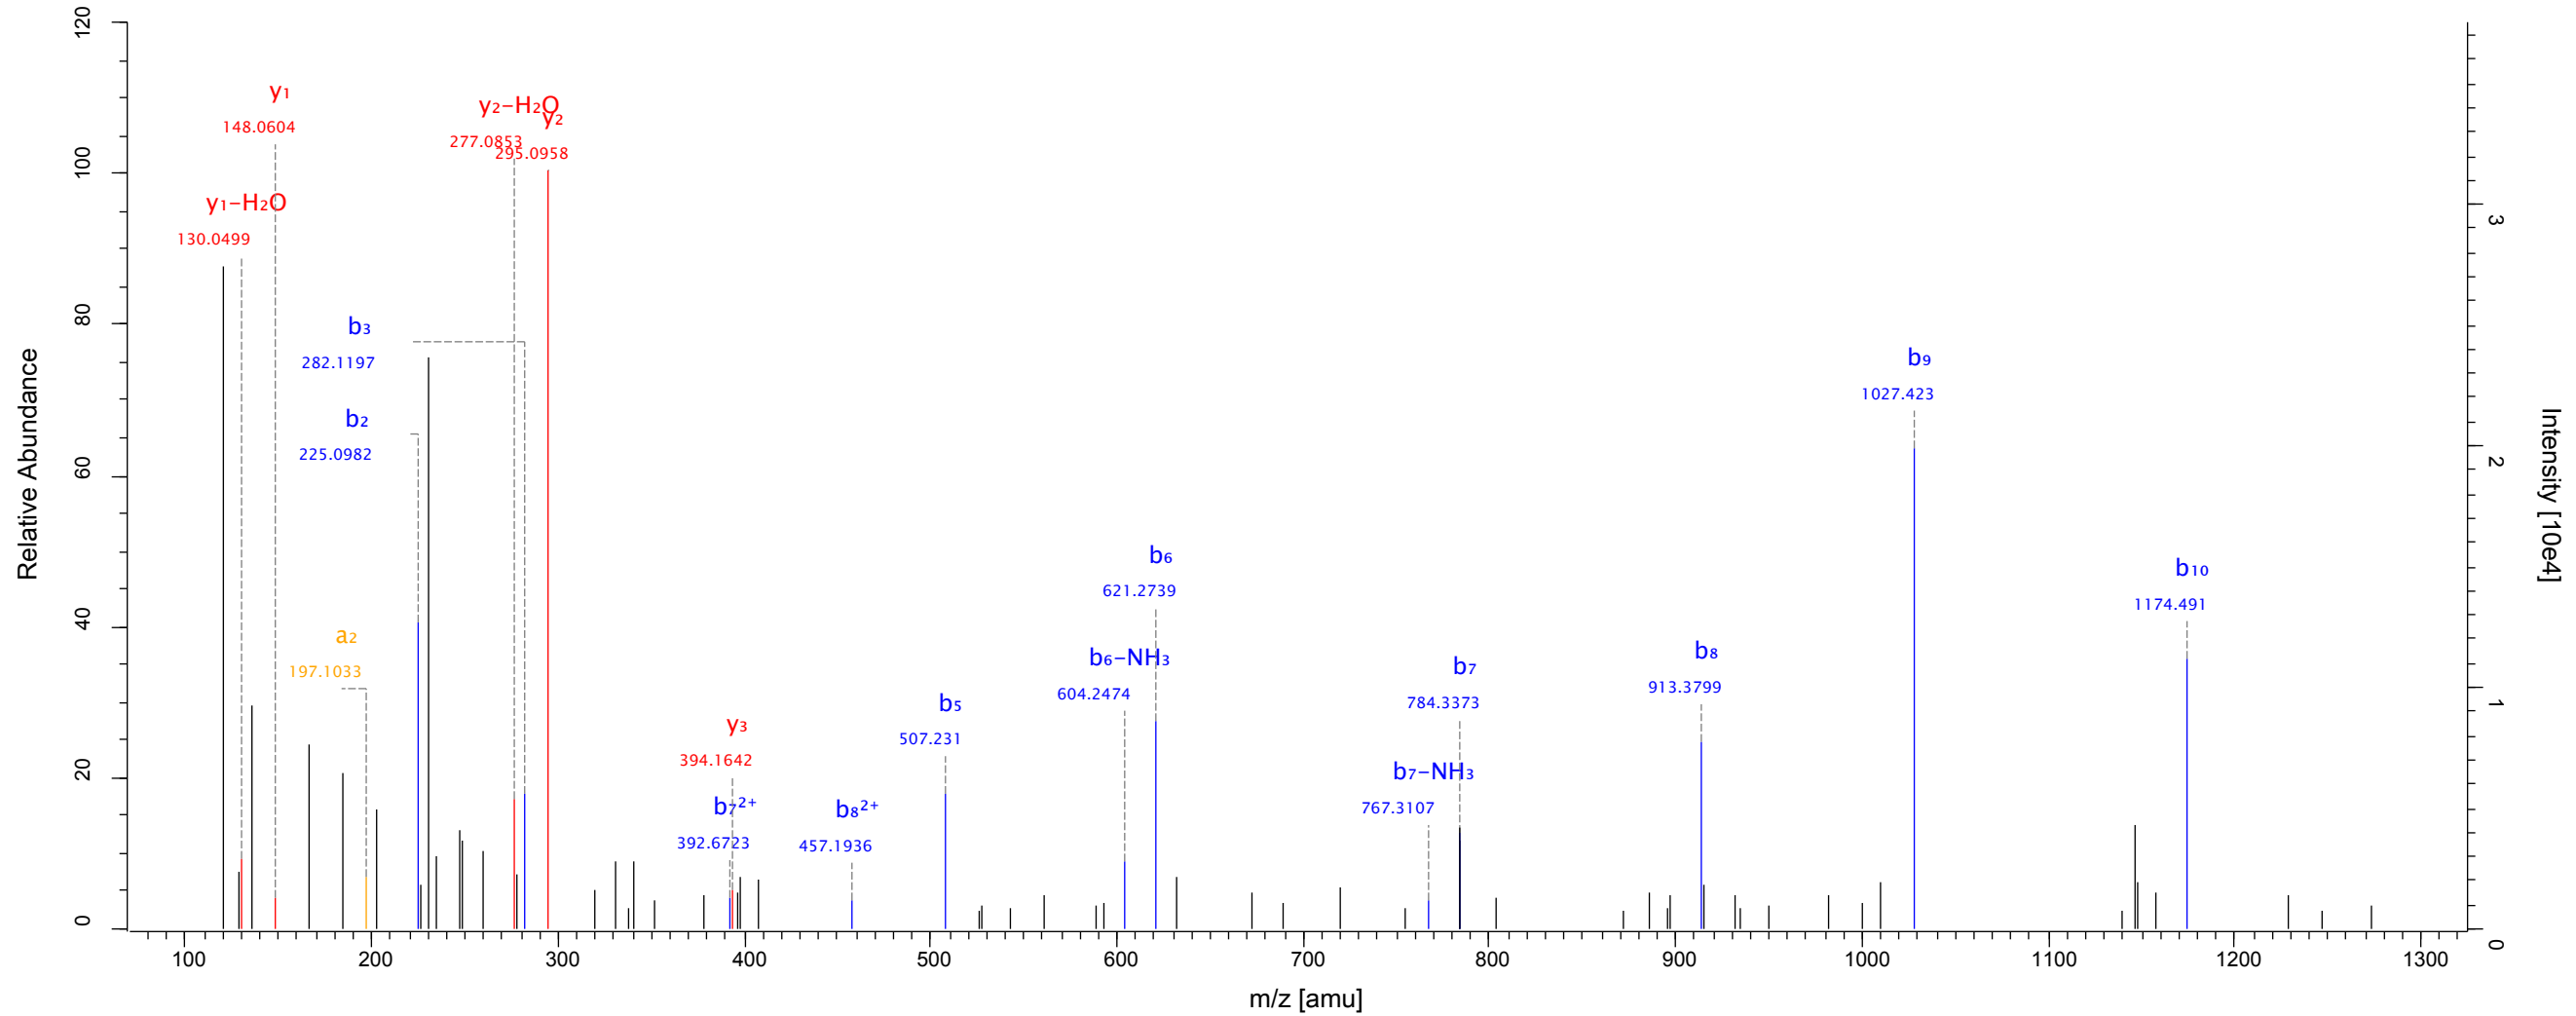

# peptide ID 104

Source: 20120816\_CO\_0340Gaje\_R02  
Scannumber: 7664  
Protein: pep\_secretome\_434  
Peptide Score: 139.28  
Method: FTMS; HCD; 1

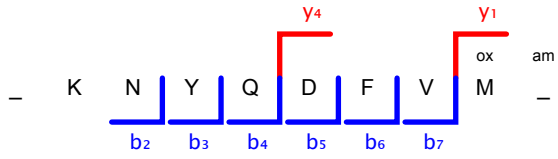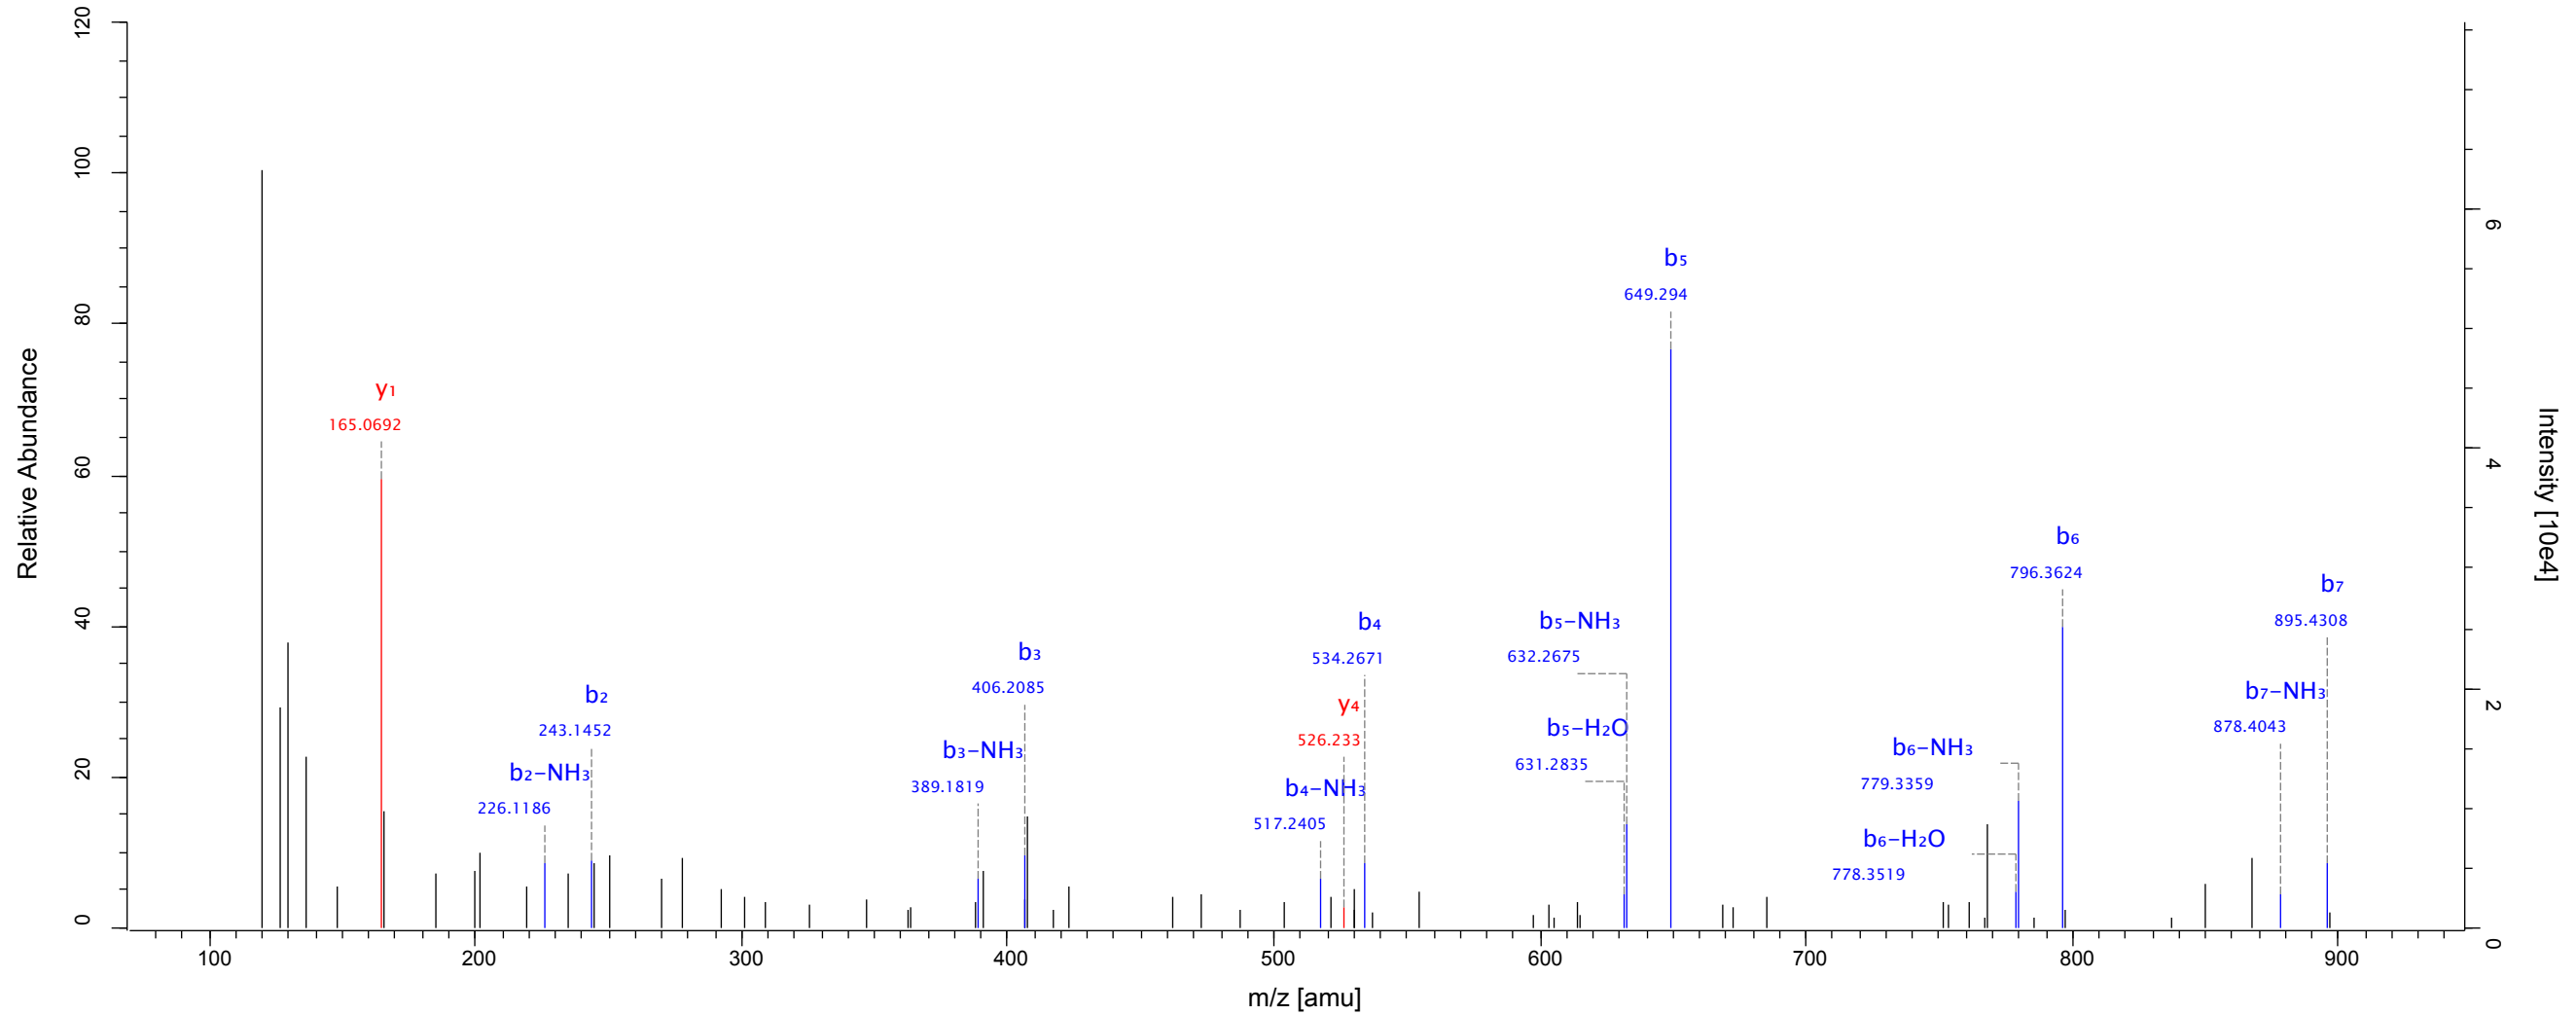

# peptide ID 105

Source: 20121106\_CO\_0340Gaje\_R02\_2  
Scannumber: 7932  
Protein: pep\_secretome\_391; pep\_secretome\_394  
Peptide Score: 148.28  
Method: FTMS; HCD; 1

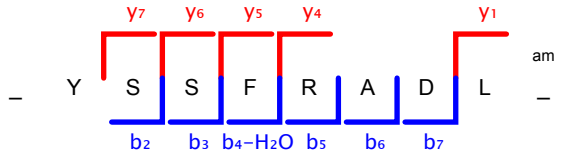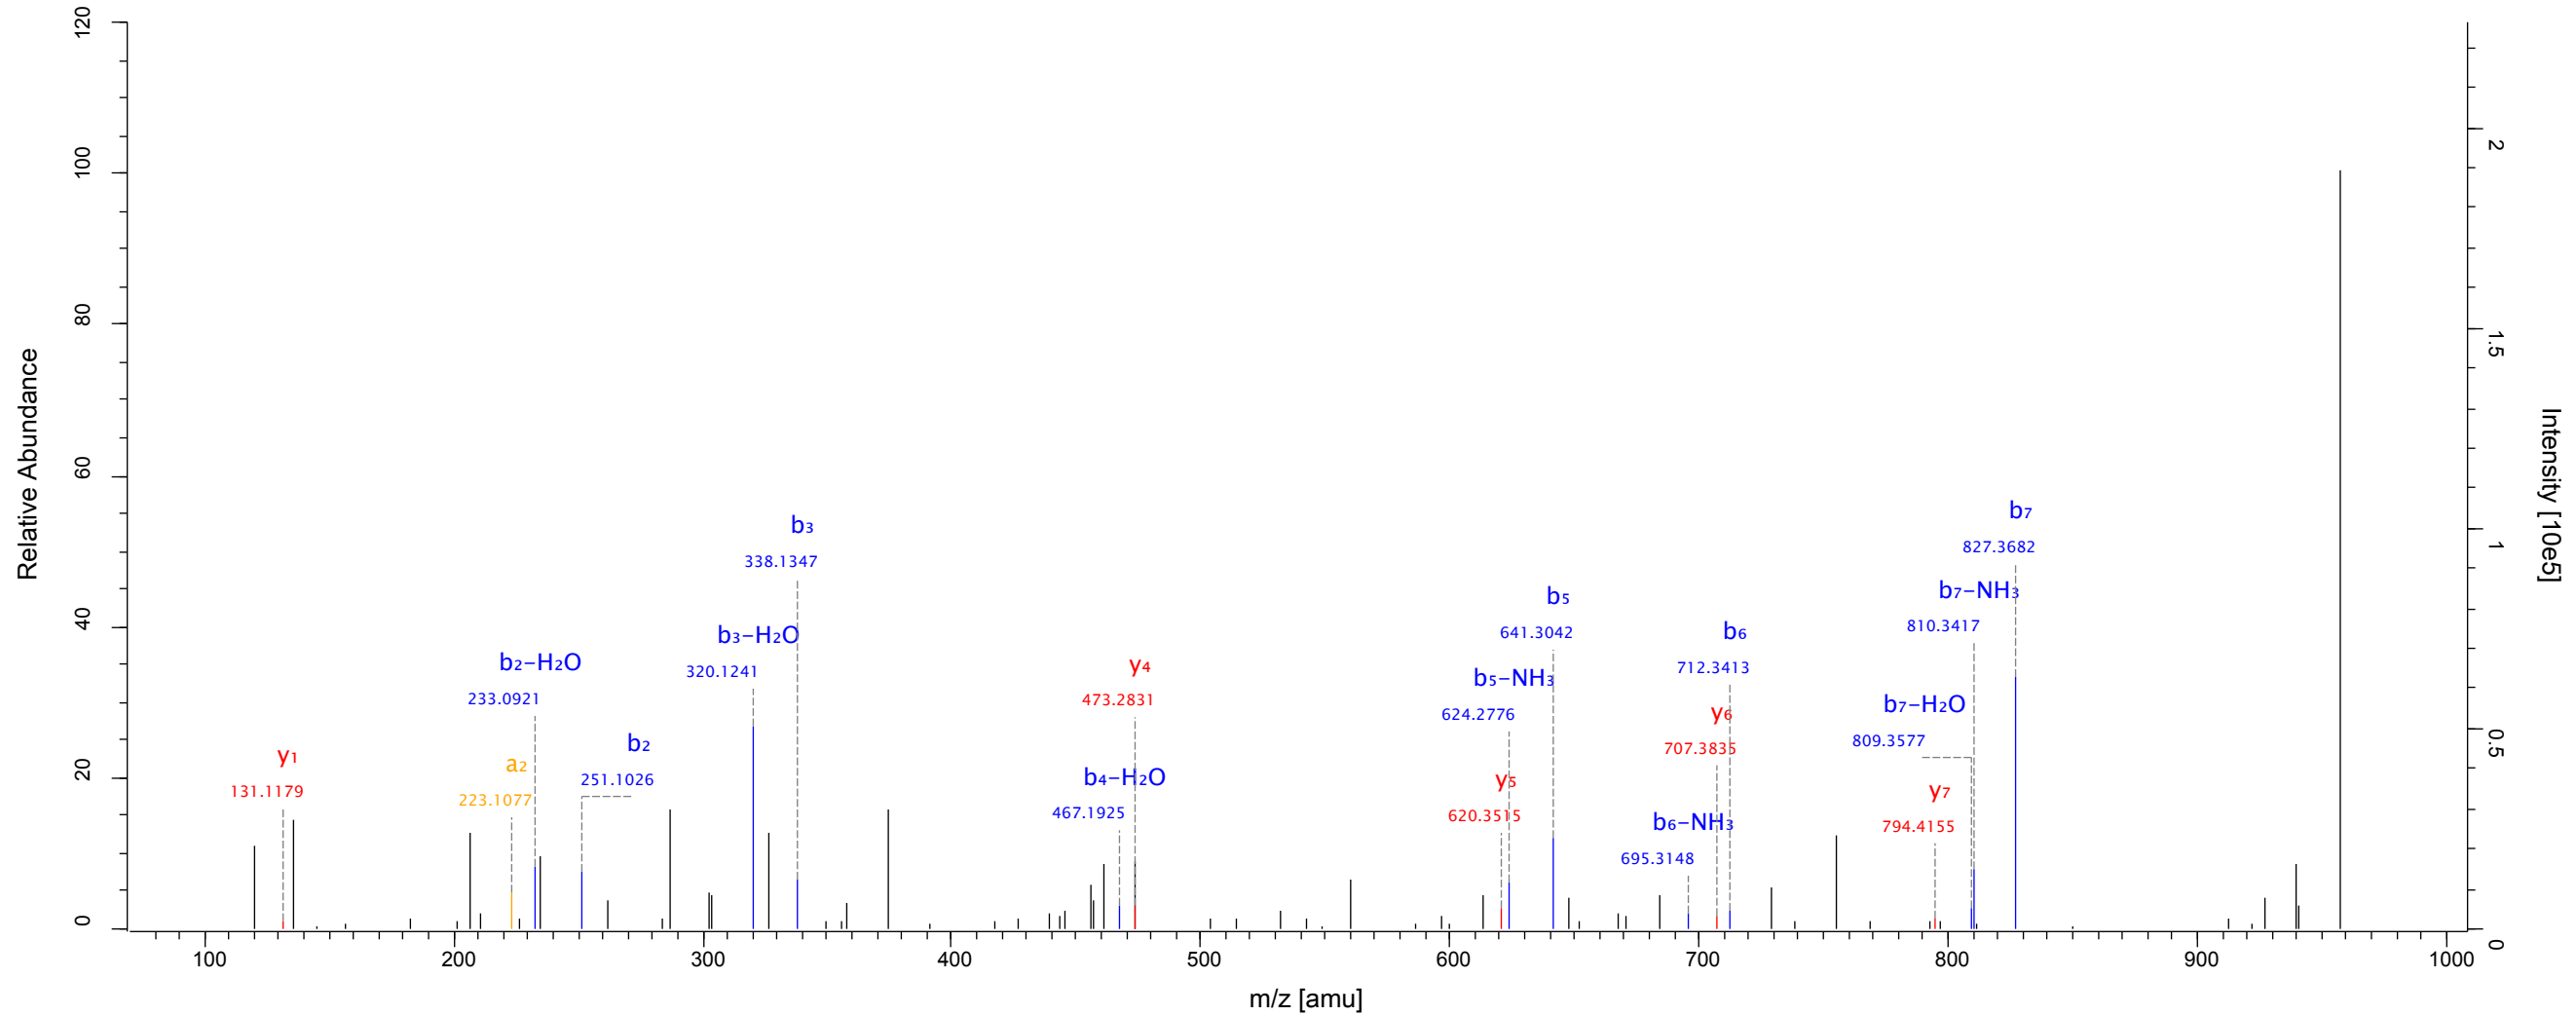

# peptide ID 106

Source: 20121106\_CO\_0340Gaje\_R02\_2  
Scannumber: 13674  
Protein: orf\_39097  
Peptide Score: 94.77  
Method: FTMS; HCD; 1

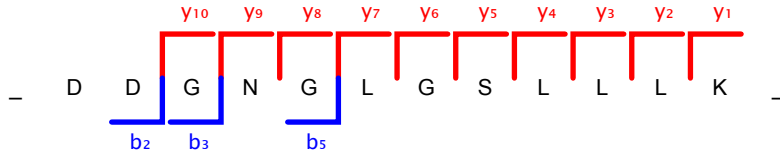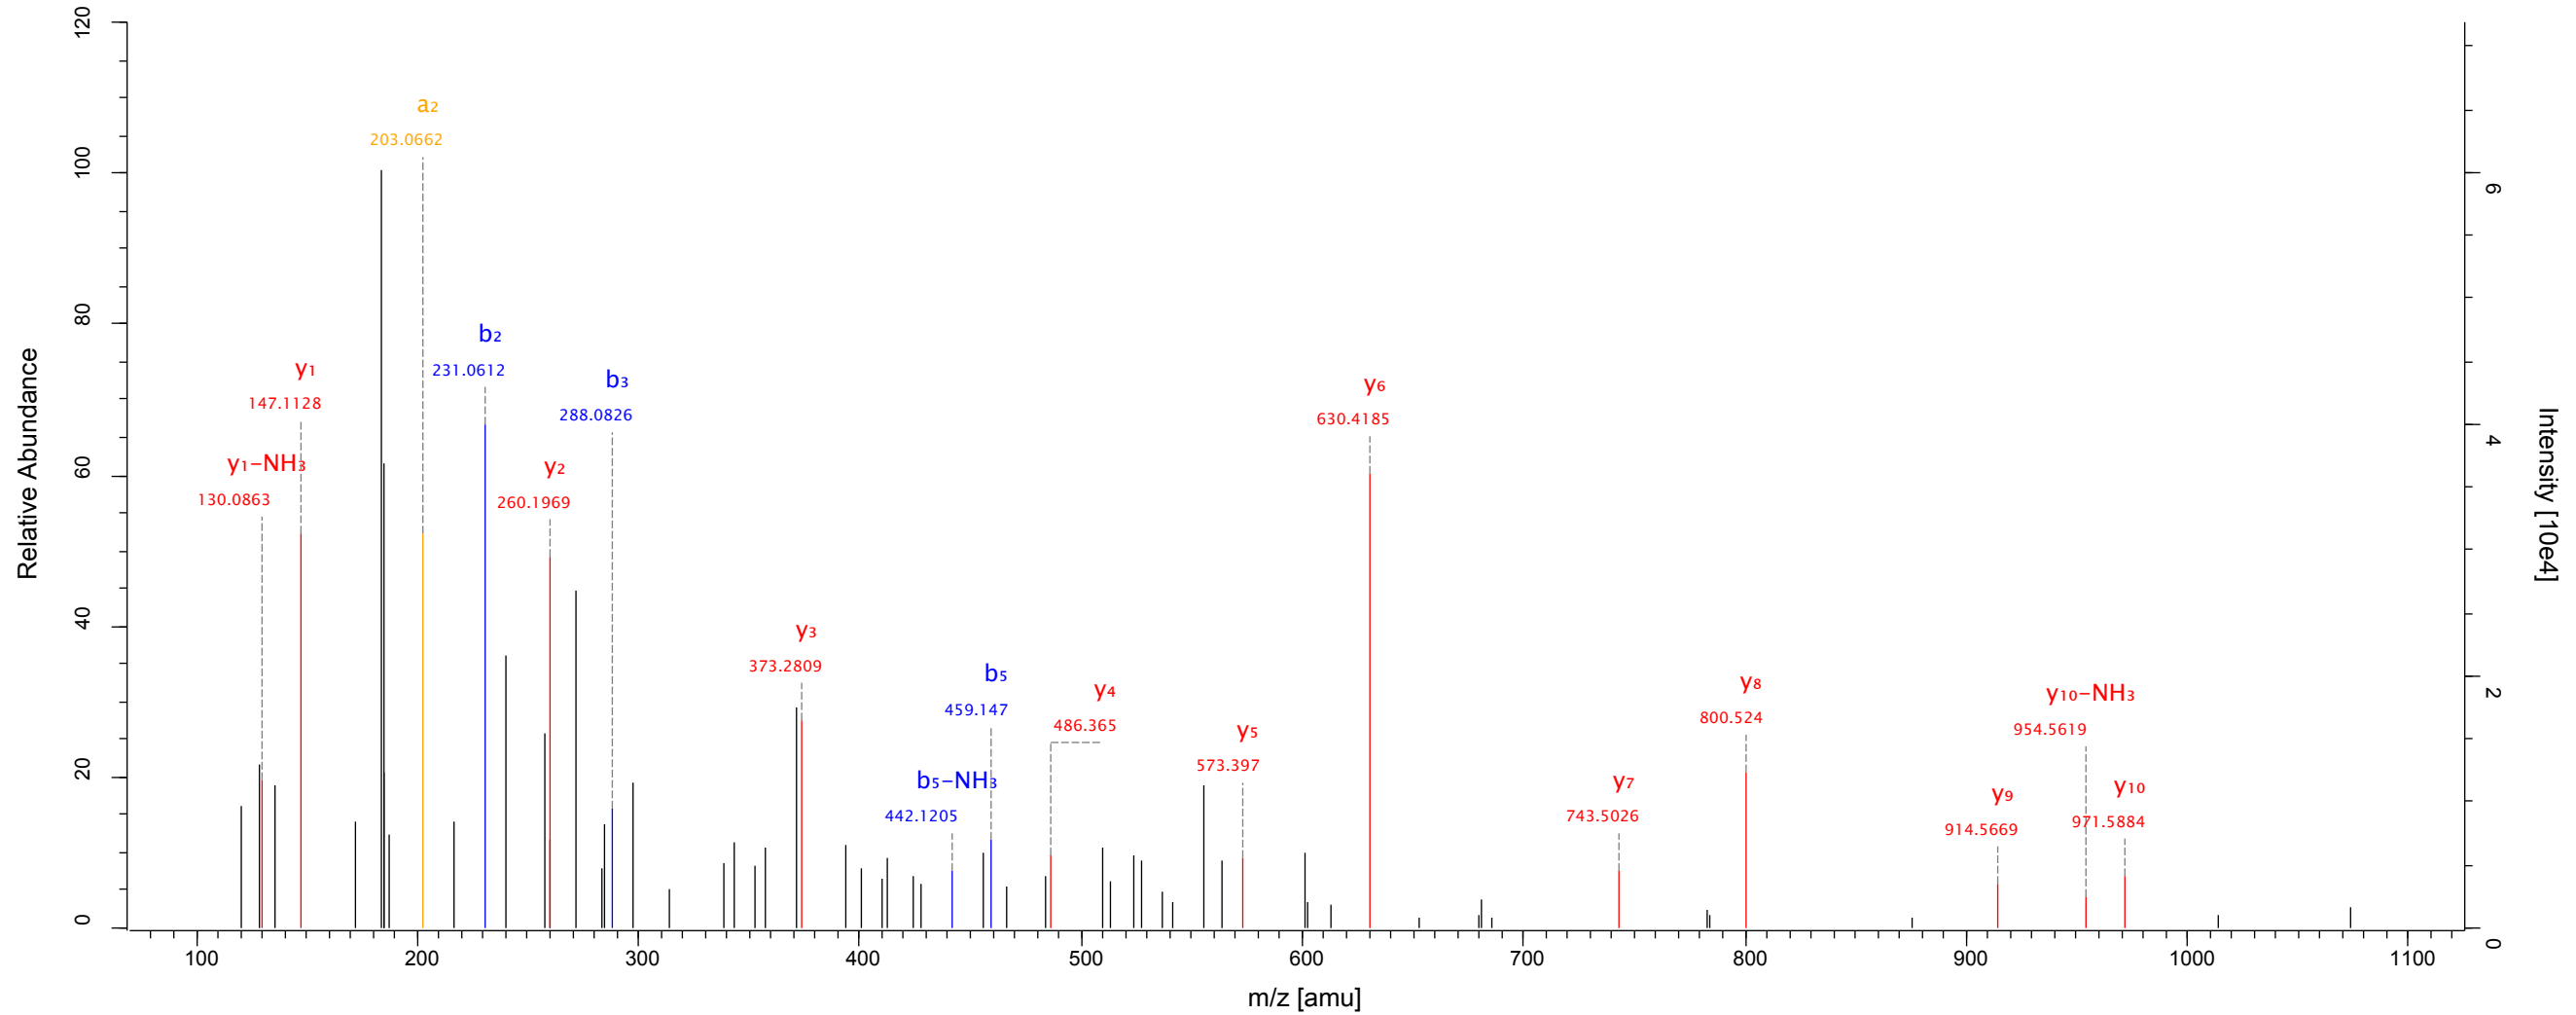

# peptide ID 107

Source: 20120515\_CO\_0340Gaje\_R01  
Scannumber: 5633  
Protein: pep\_secretome\_11312  
Peptide Score: 225.85  
Method: FTMS; HCD; 1

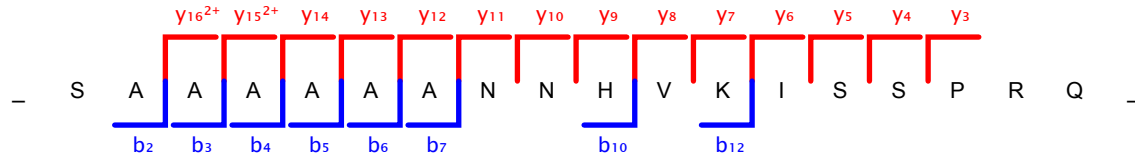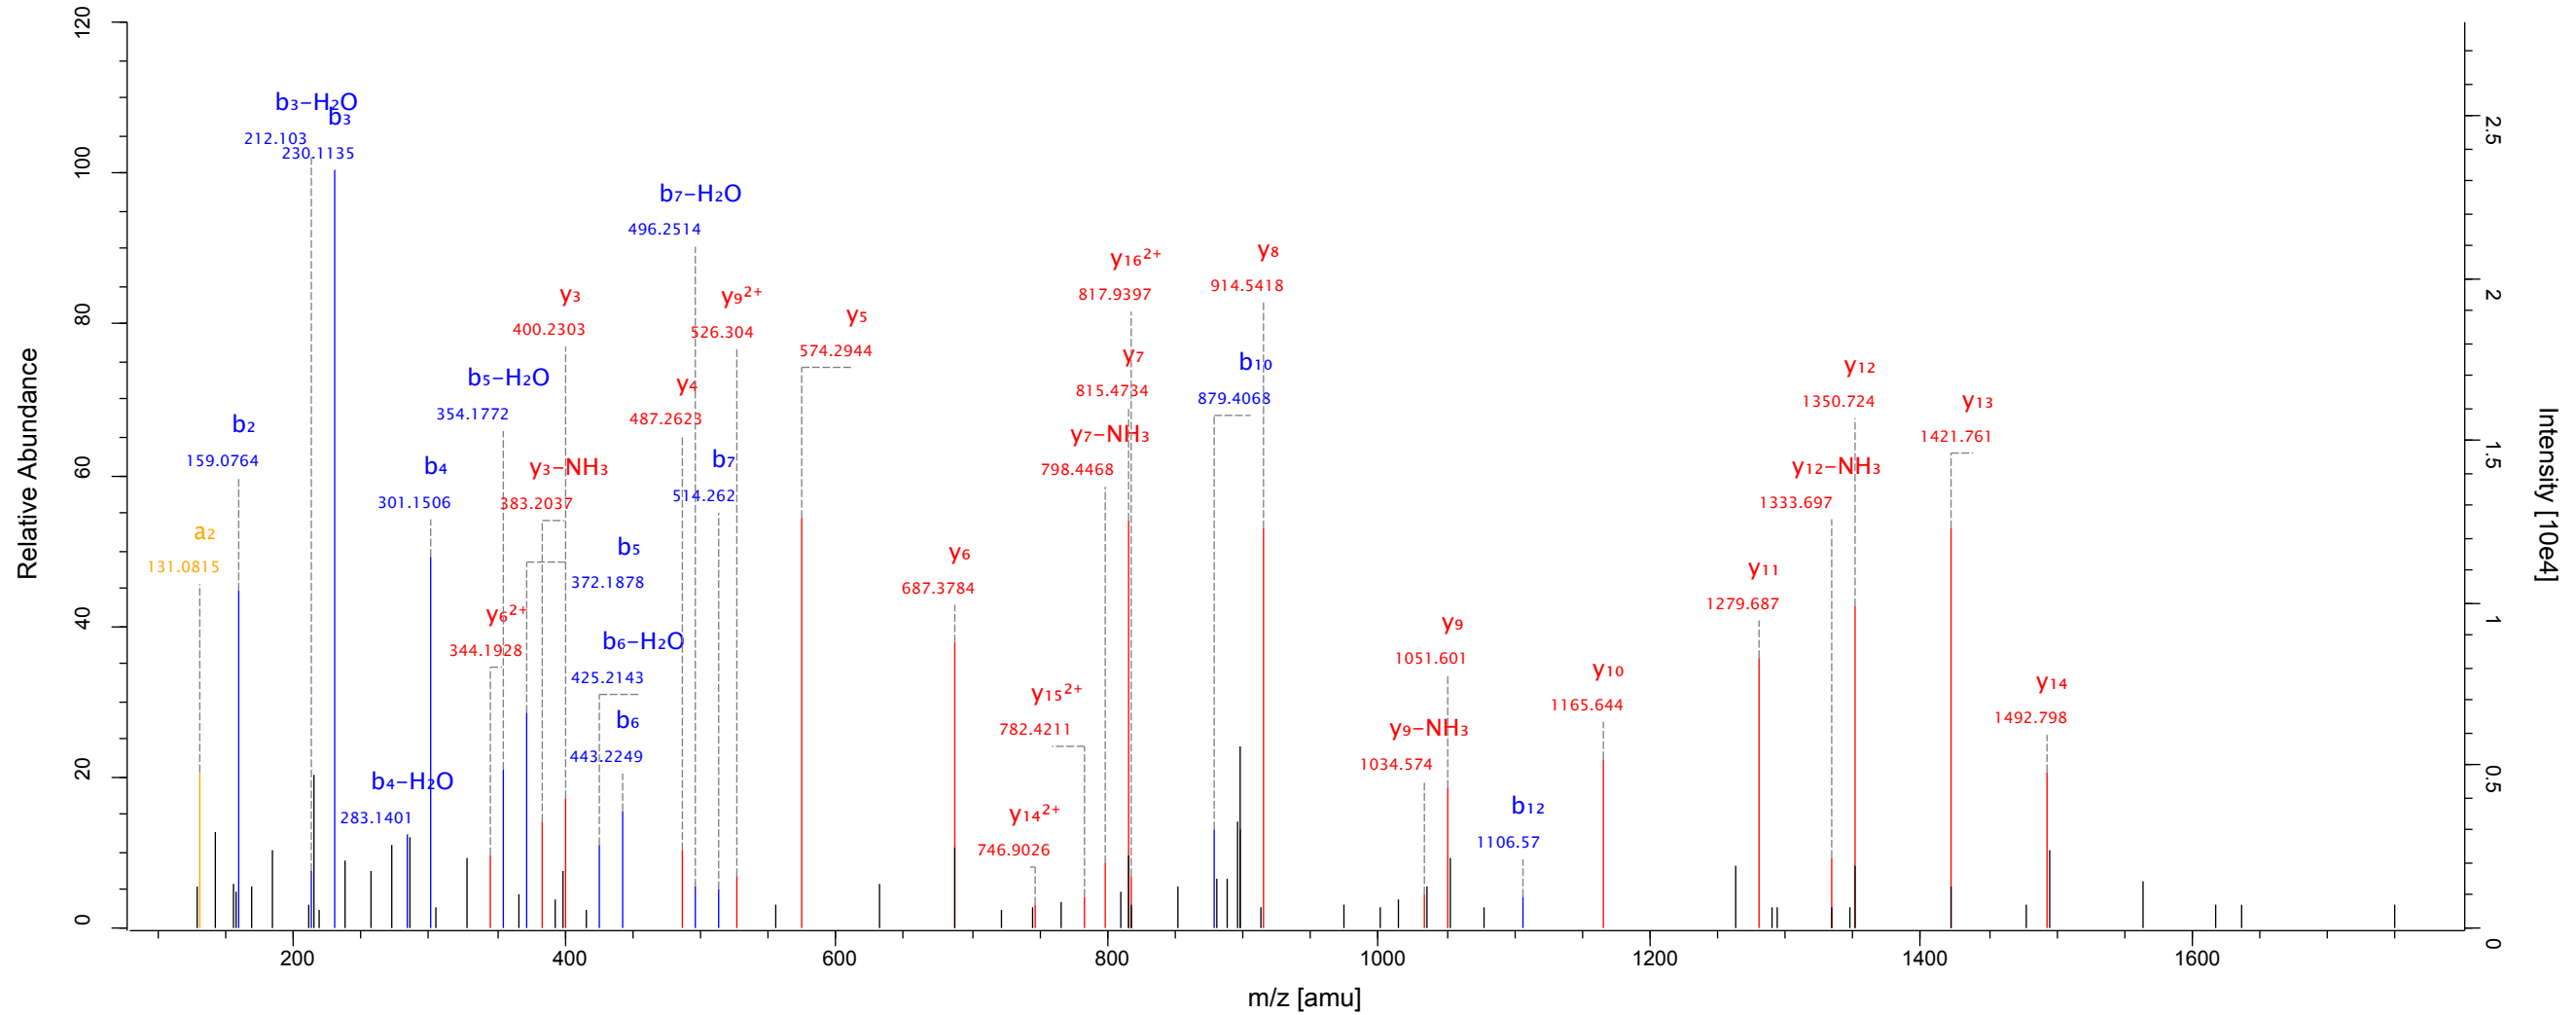

# peptide ID 108

Source: 20120816\_CO\_0340Gaje\_R02  
Scannumber: 7103  
Protein: pep\_secretome\_8203  
Peptide Score: 128.57  
Method: FTMS; HCD; 1

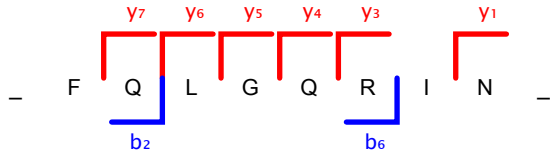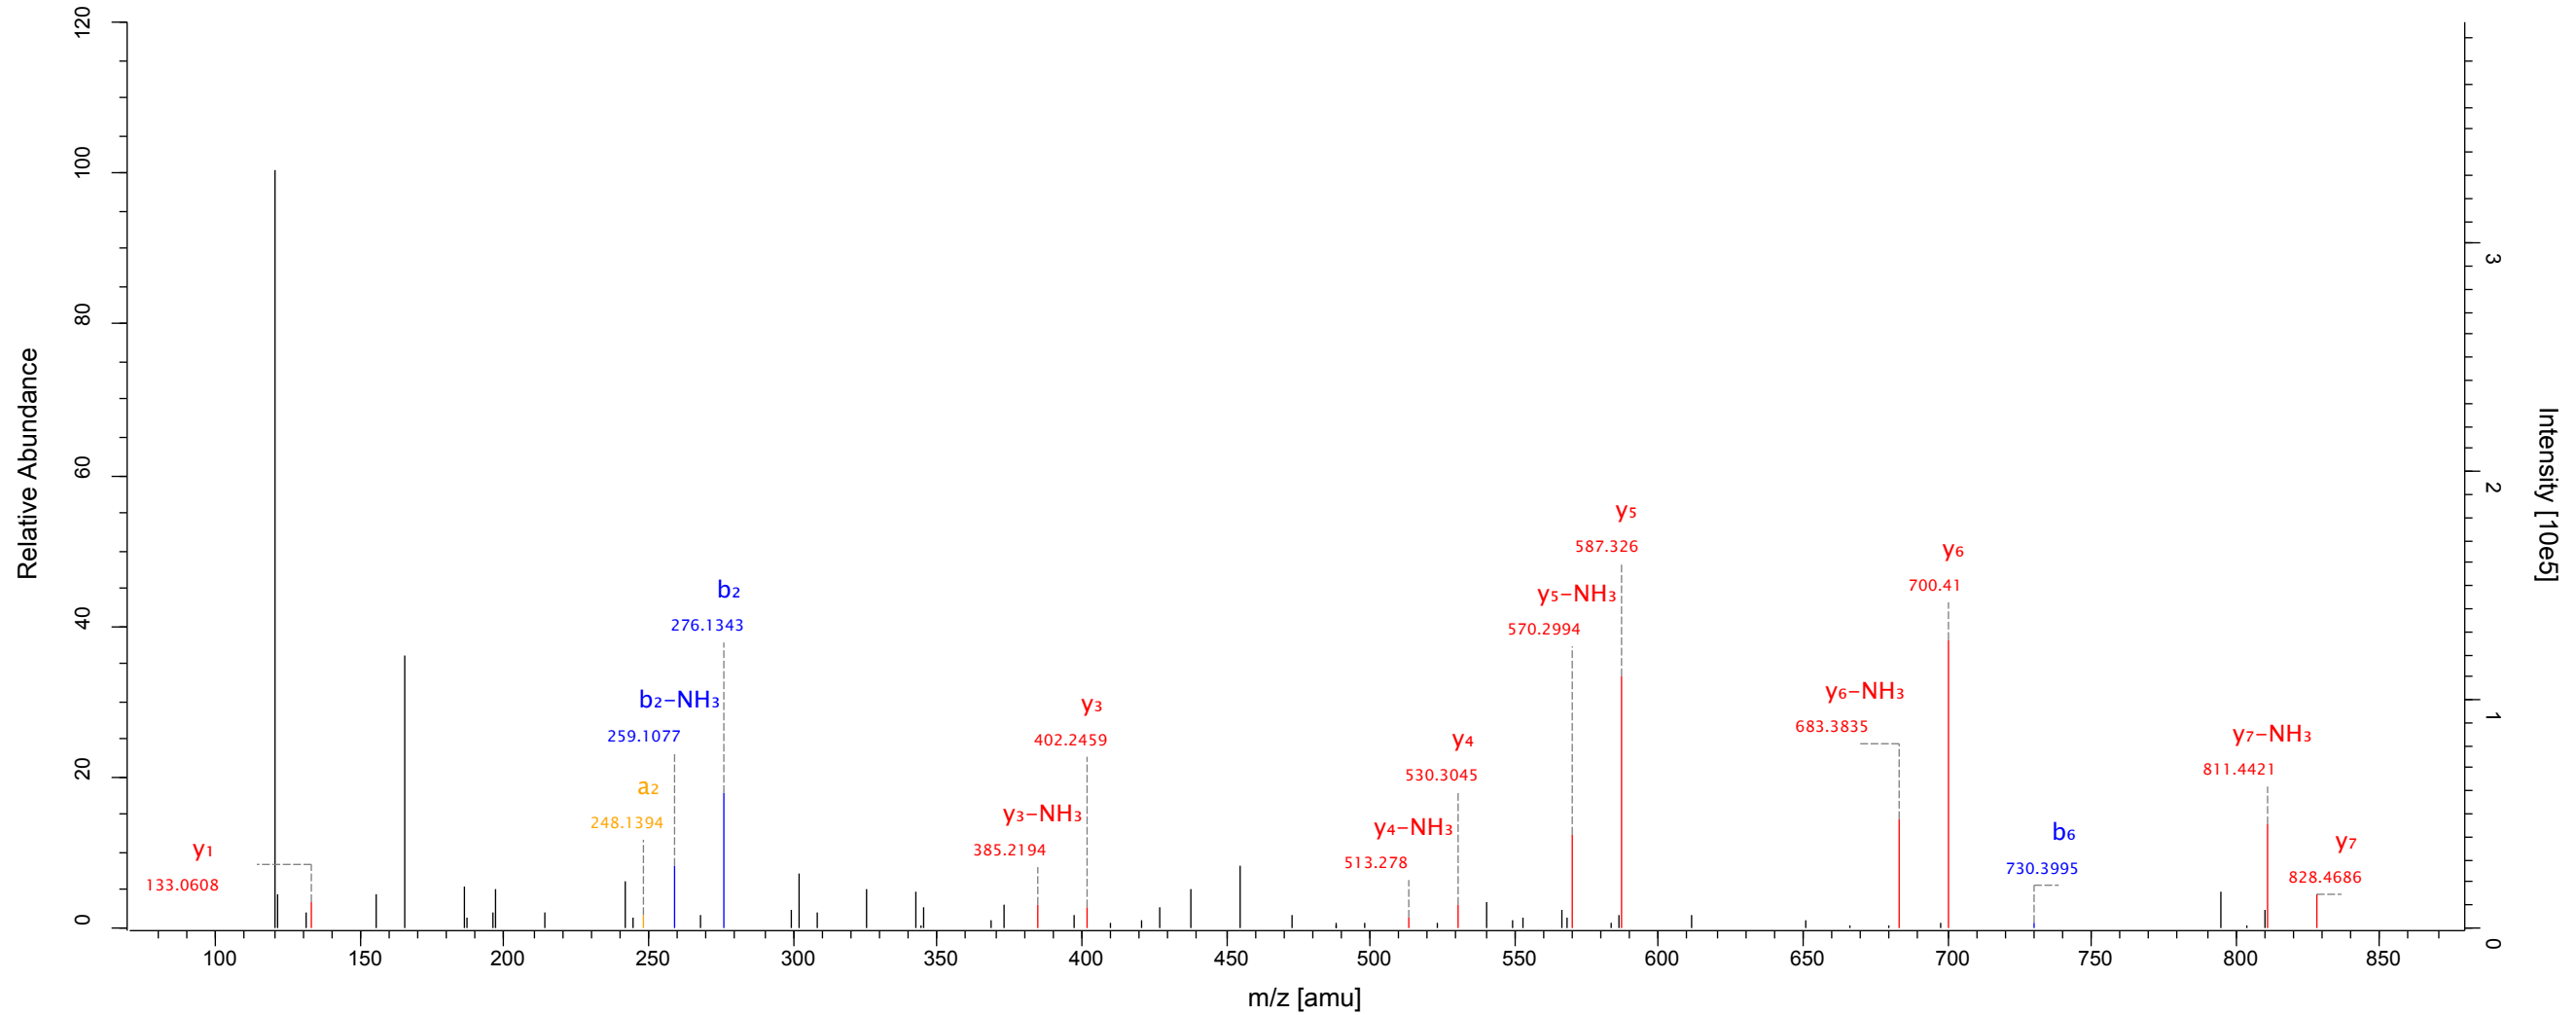



# peptide ID 109

Source: 20121106\_CO\_0340Gaje\_R02\_2  
Scannumber: 13572  
Protein: pep\_secretome\_15484  
Peptide Score: 84.29  
Method: FTMS; HCD; 1

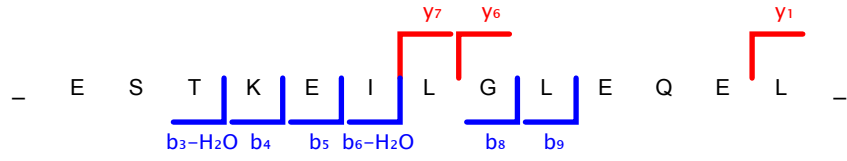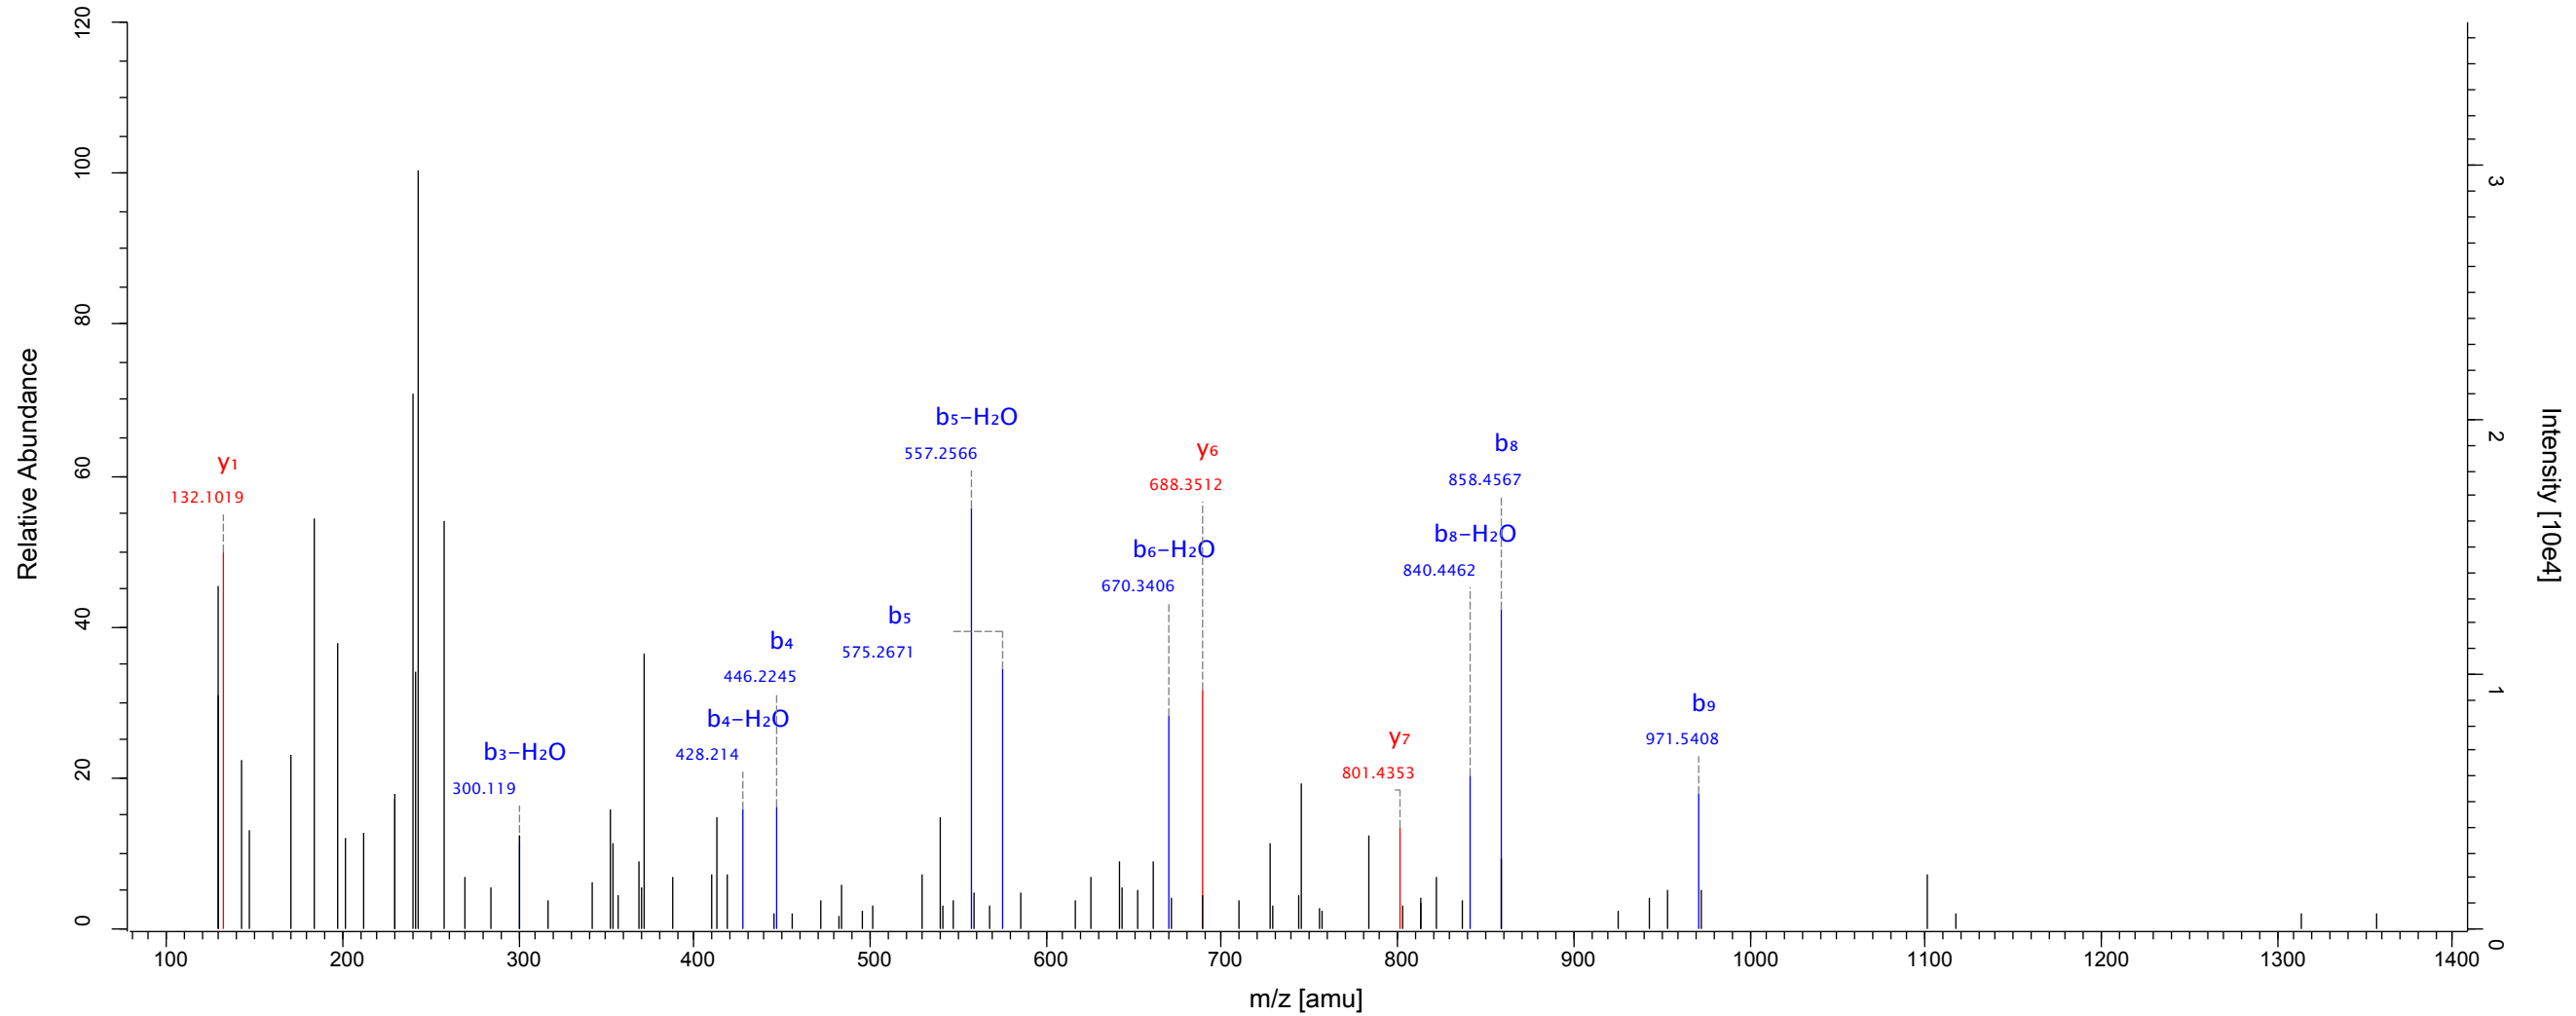

# peptide ID 110

Source: 20120816\_CO\_0340Gaje\_R02  
Scannumber: 9758  
Protein: pep\_219; pep\_secretome\_557; pep\_secretome\_563; pep\_secretome\_566  
Peptide Score: 61.76  
Method: FTMS; HCD; 1

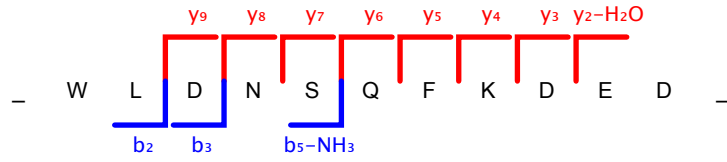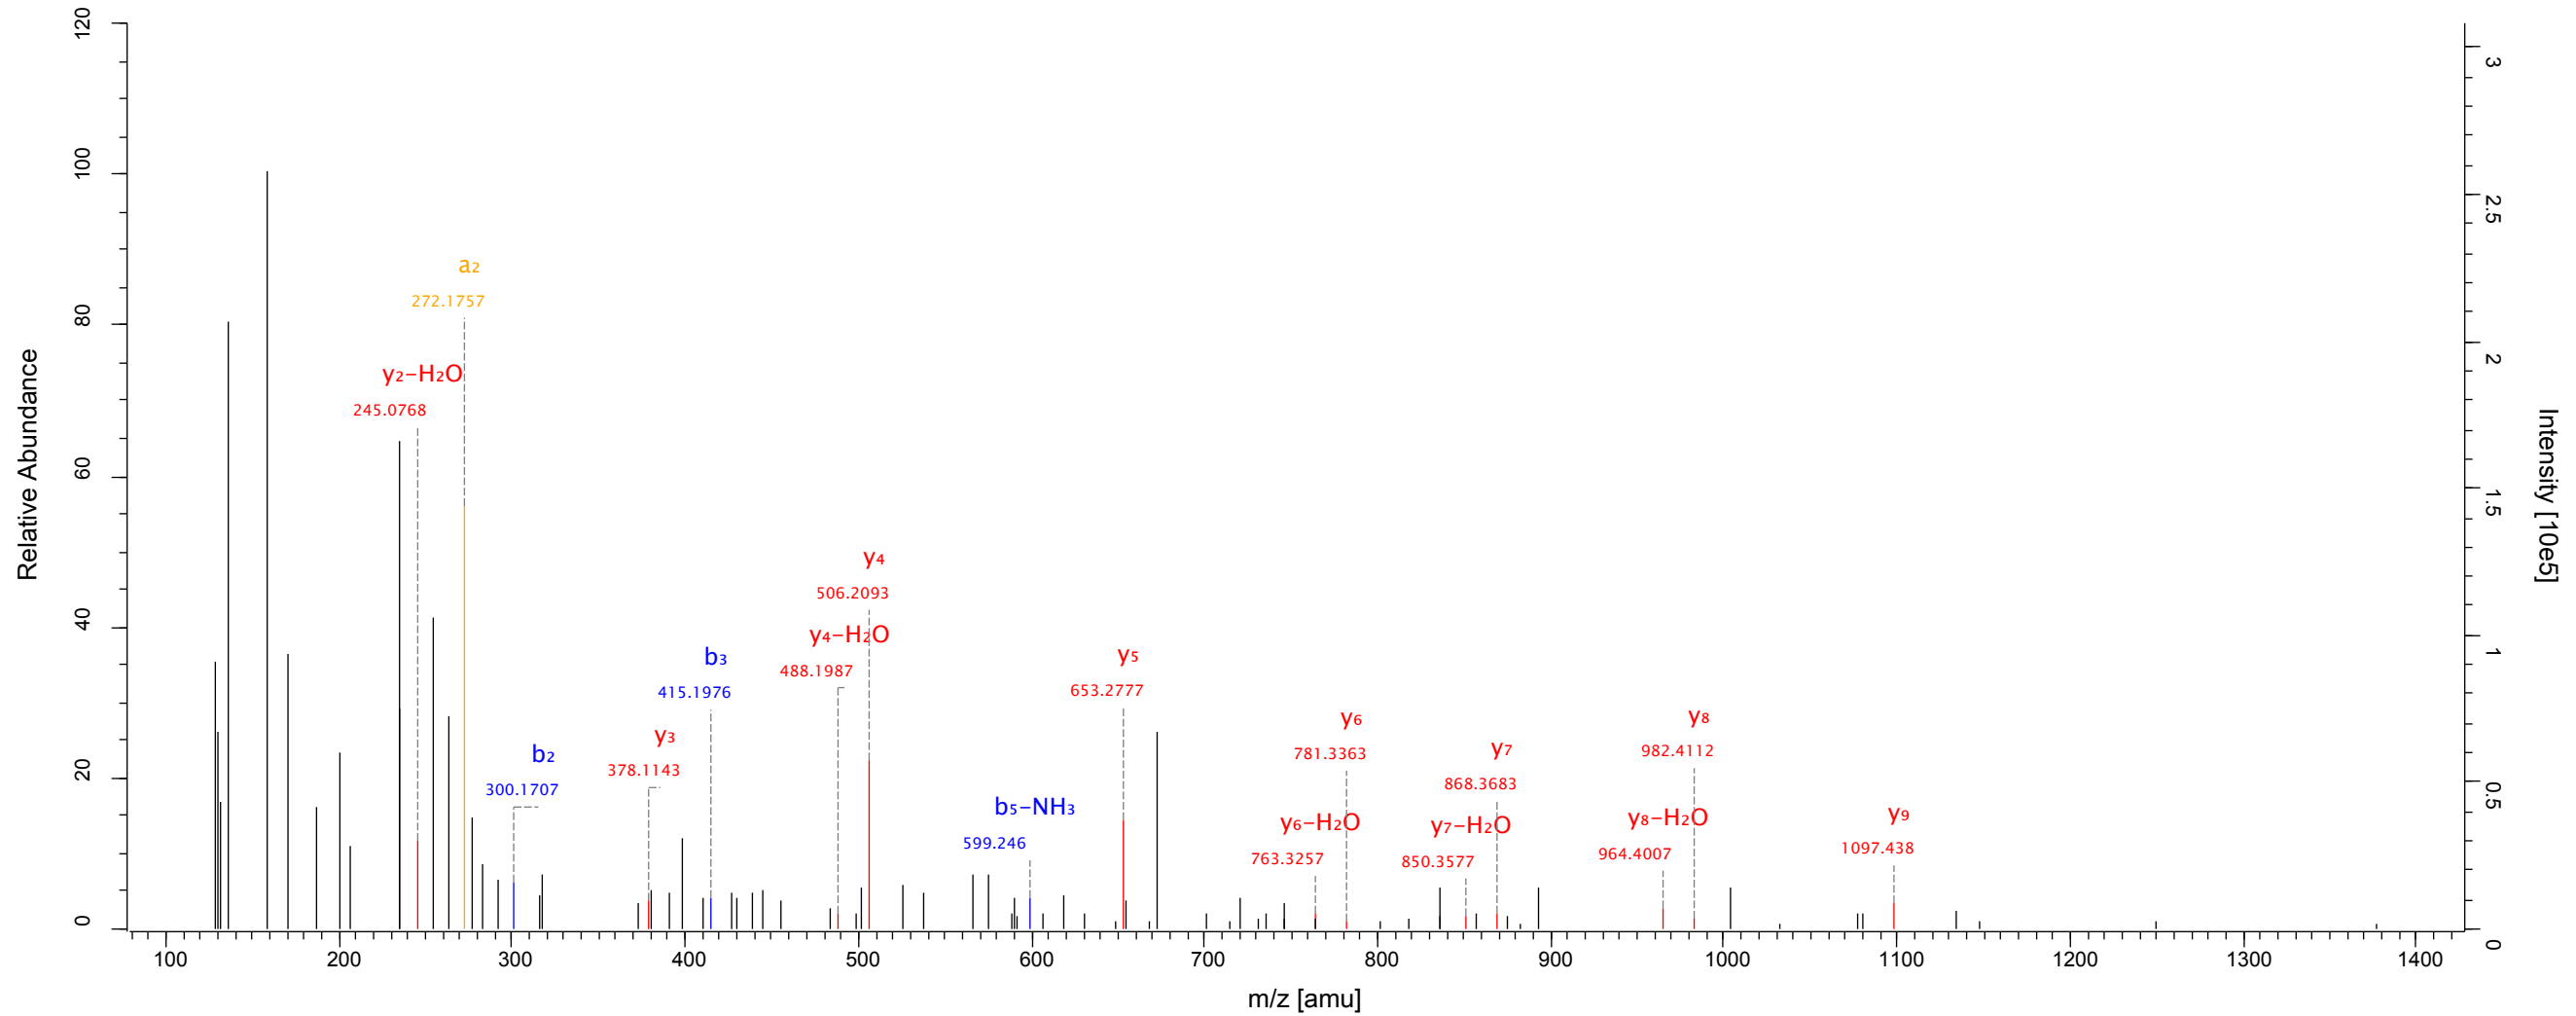

# peptide ID 111

Source: 20120816\_CO\_0340Gaje\_R02  
Scannumber: 10099  
Protein: pep\_secretome\_558; pep\_secretome\_565  
Peptide Score: 80.75  
Method: FTMS; HCD; 1

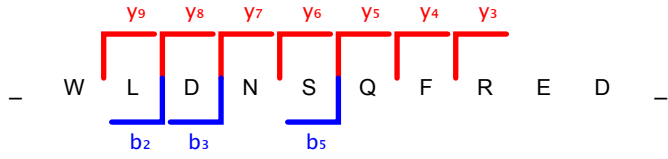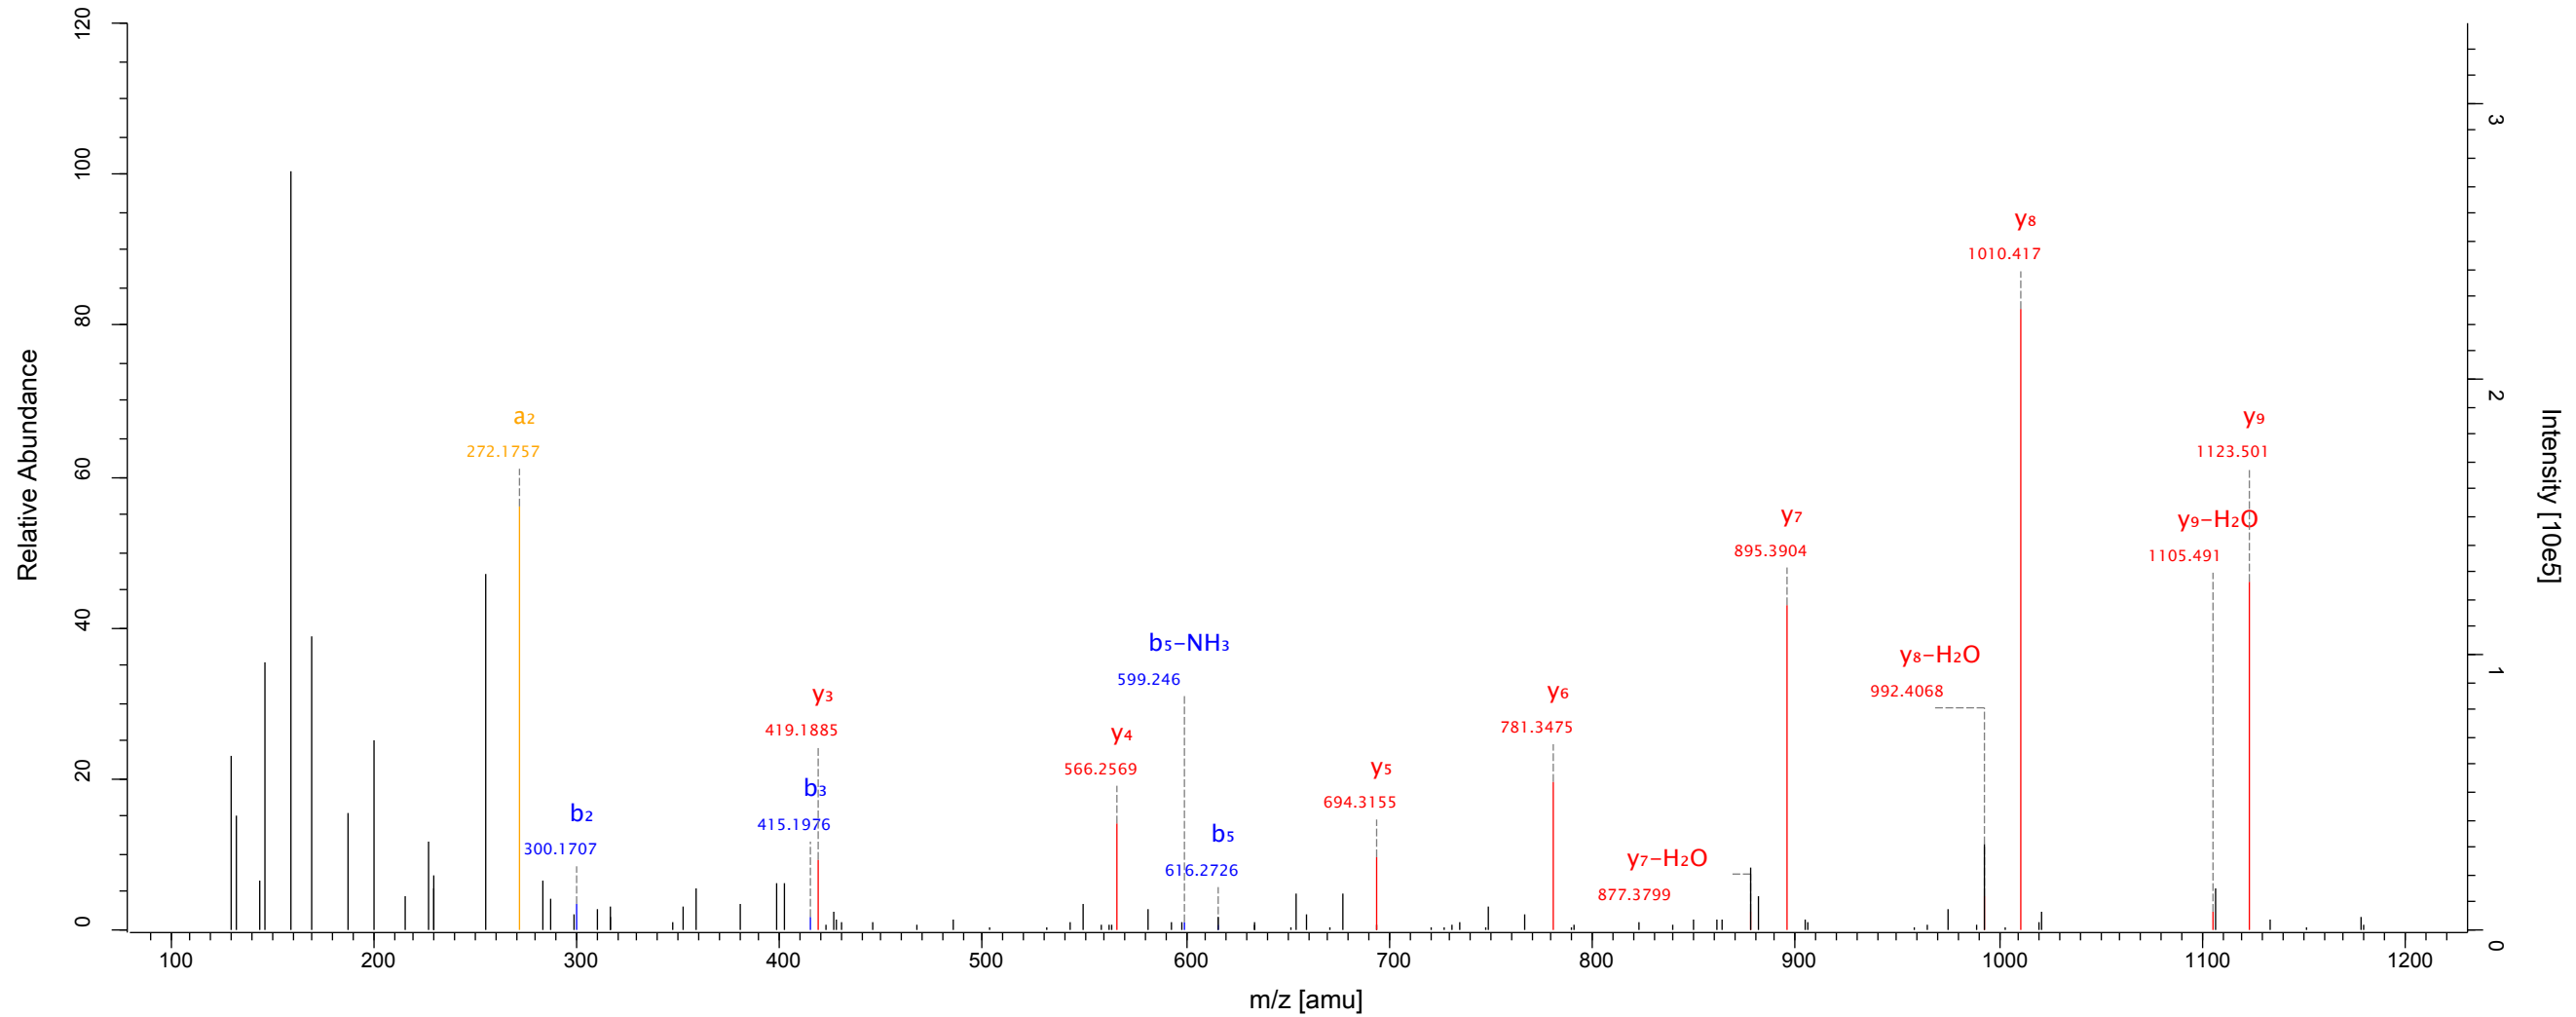

# peptide ID 112

Source: 20120816\_CO\_0340Gaje\_R02  
Scannumber: 8943  
Protein: pep\_secretome\_1287  
Peptide Score: 102.66  
Method: FTMS; HCD; 1

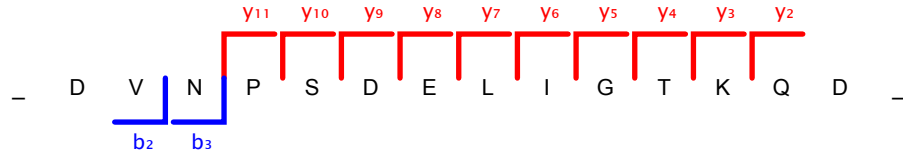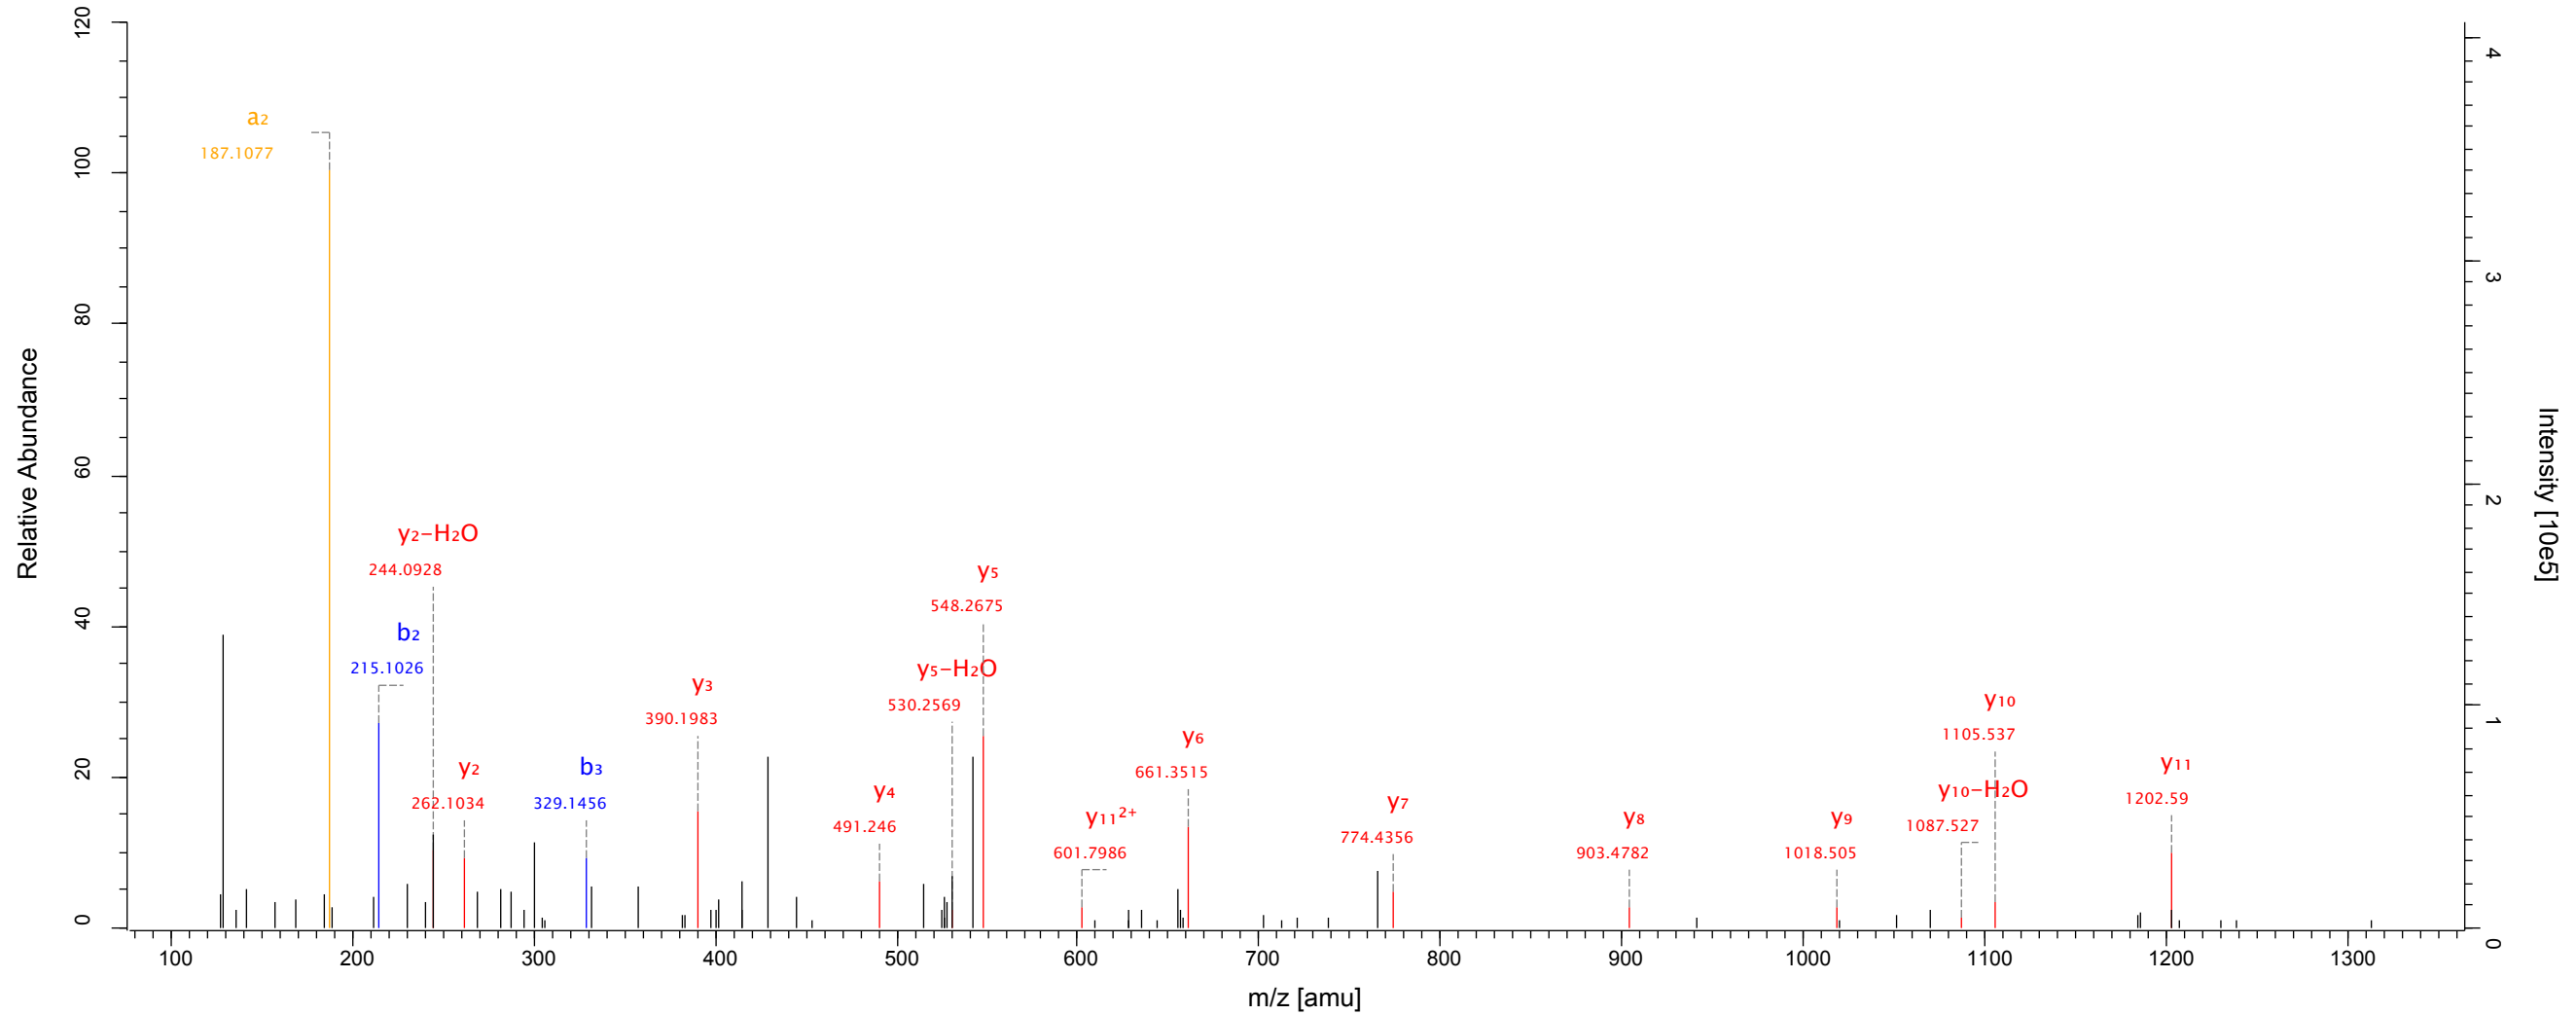

# peptide ID 113

Source: 20120816\_CO\_0340Gaje\_R02  
Scannumber: 6479  
Protein: pep\_230; pep\_secretome\_1290; pep\_secretome\_1293; pep\_secretome\_1305; pep\_secretome\_1308  
Peptide Score: 91.96  
Method: FTMS; HCD; 1

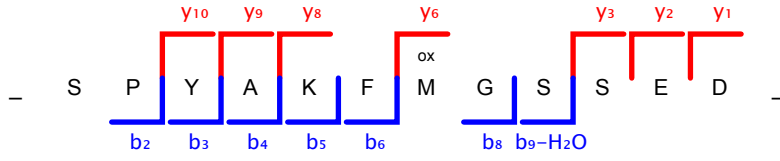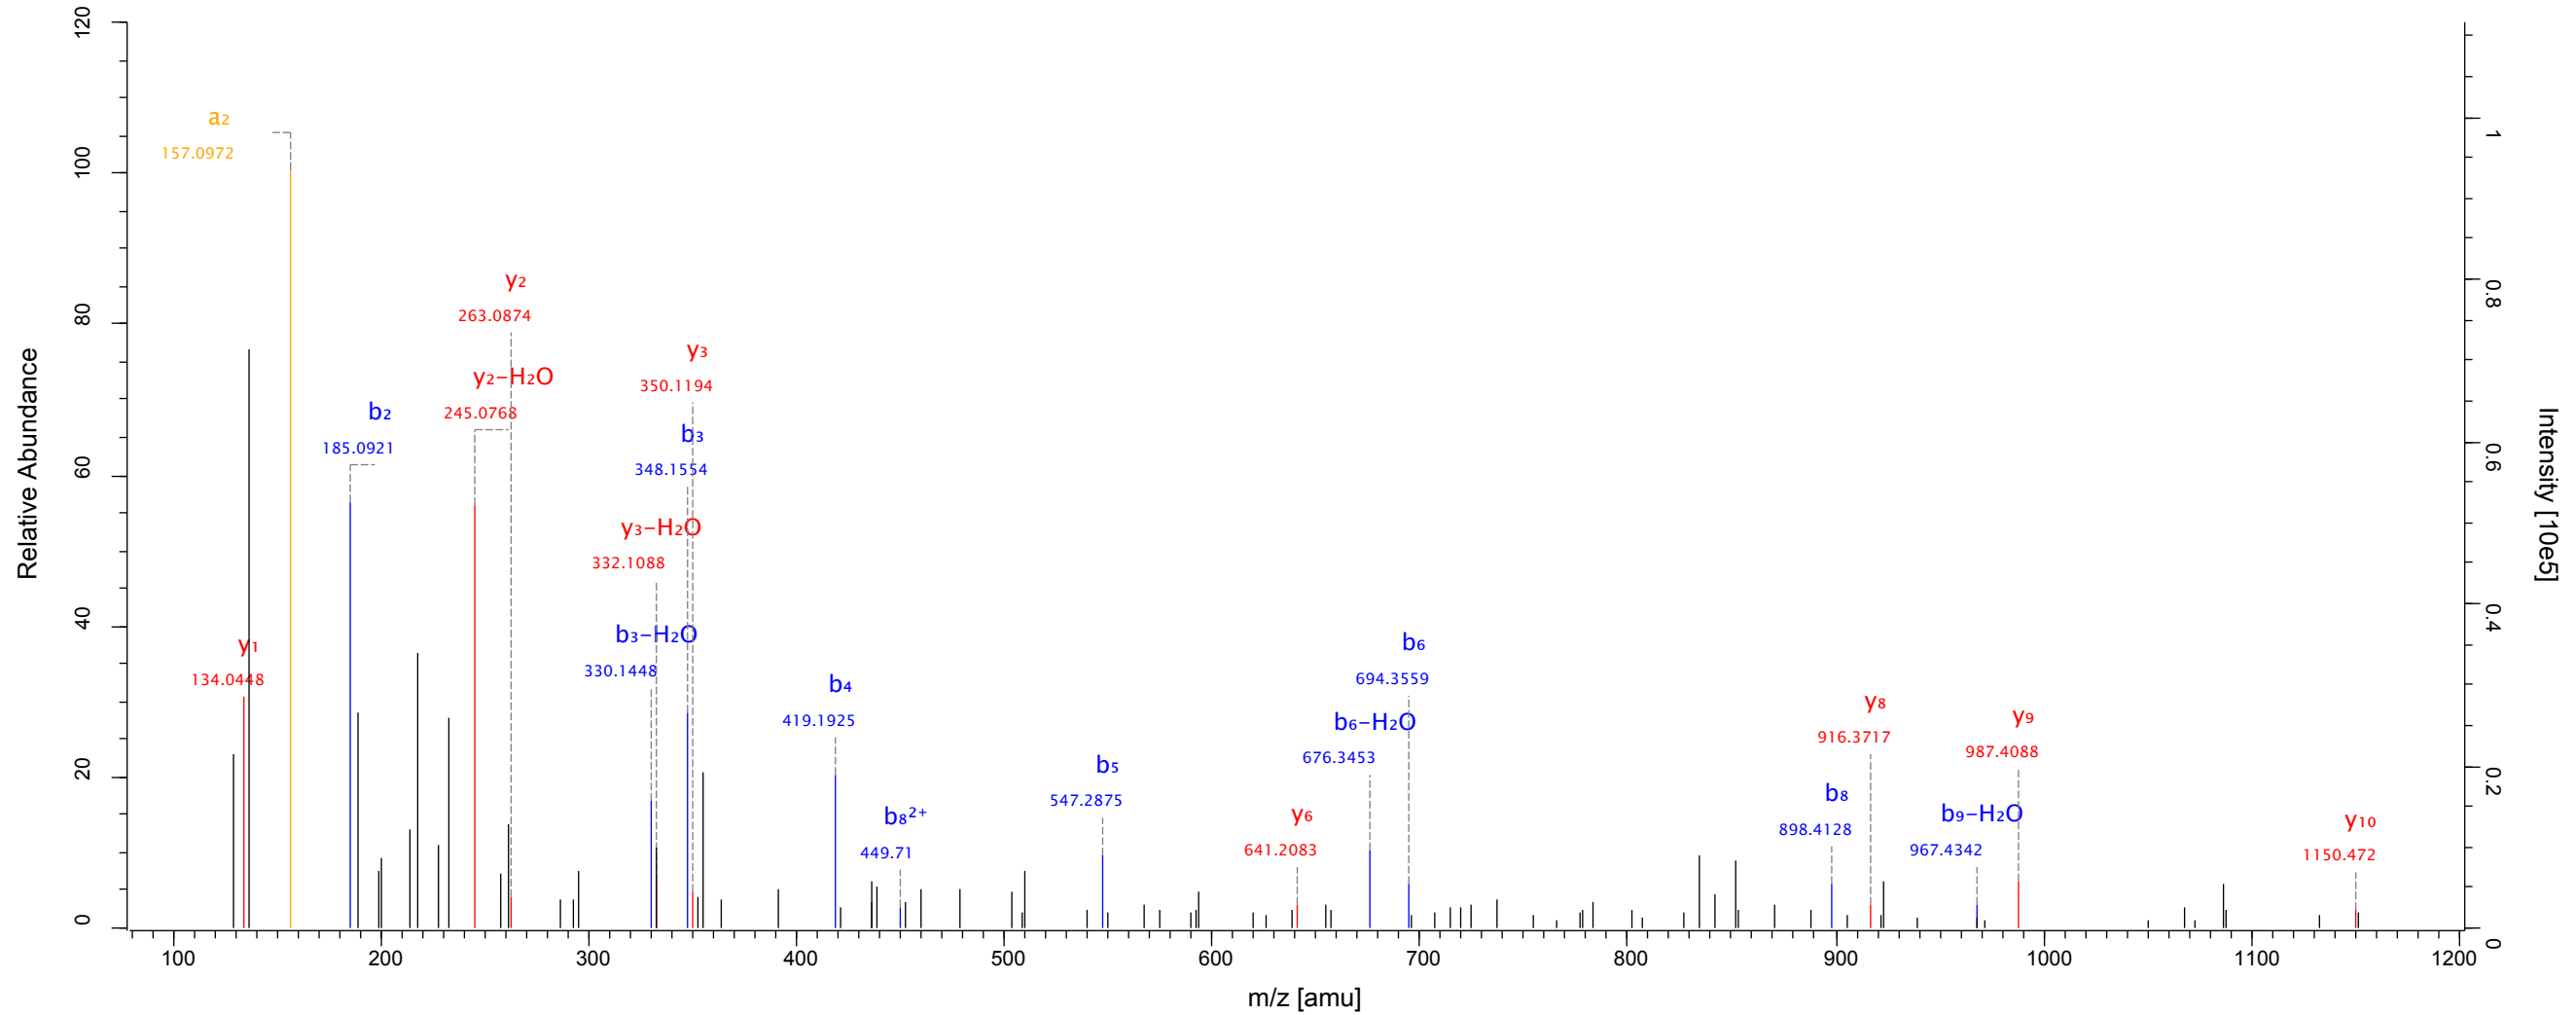

# peptide ID 114

Source: 20120816\_CO\_0340Gaje\_R02  
Scannumber: 9278  
Protein: pep\_230; pep\_secretome\_1290; pep\_secretome\_1293; pep\_secretome\_1305; pep\_secretome\_1308  
Peptide Score: 99.5  
Method: FTMS; HCD; 1

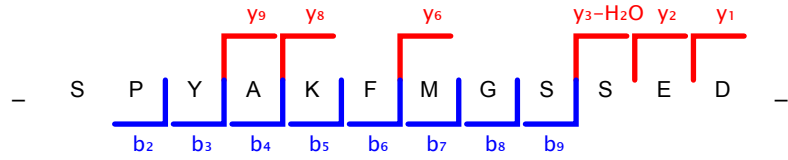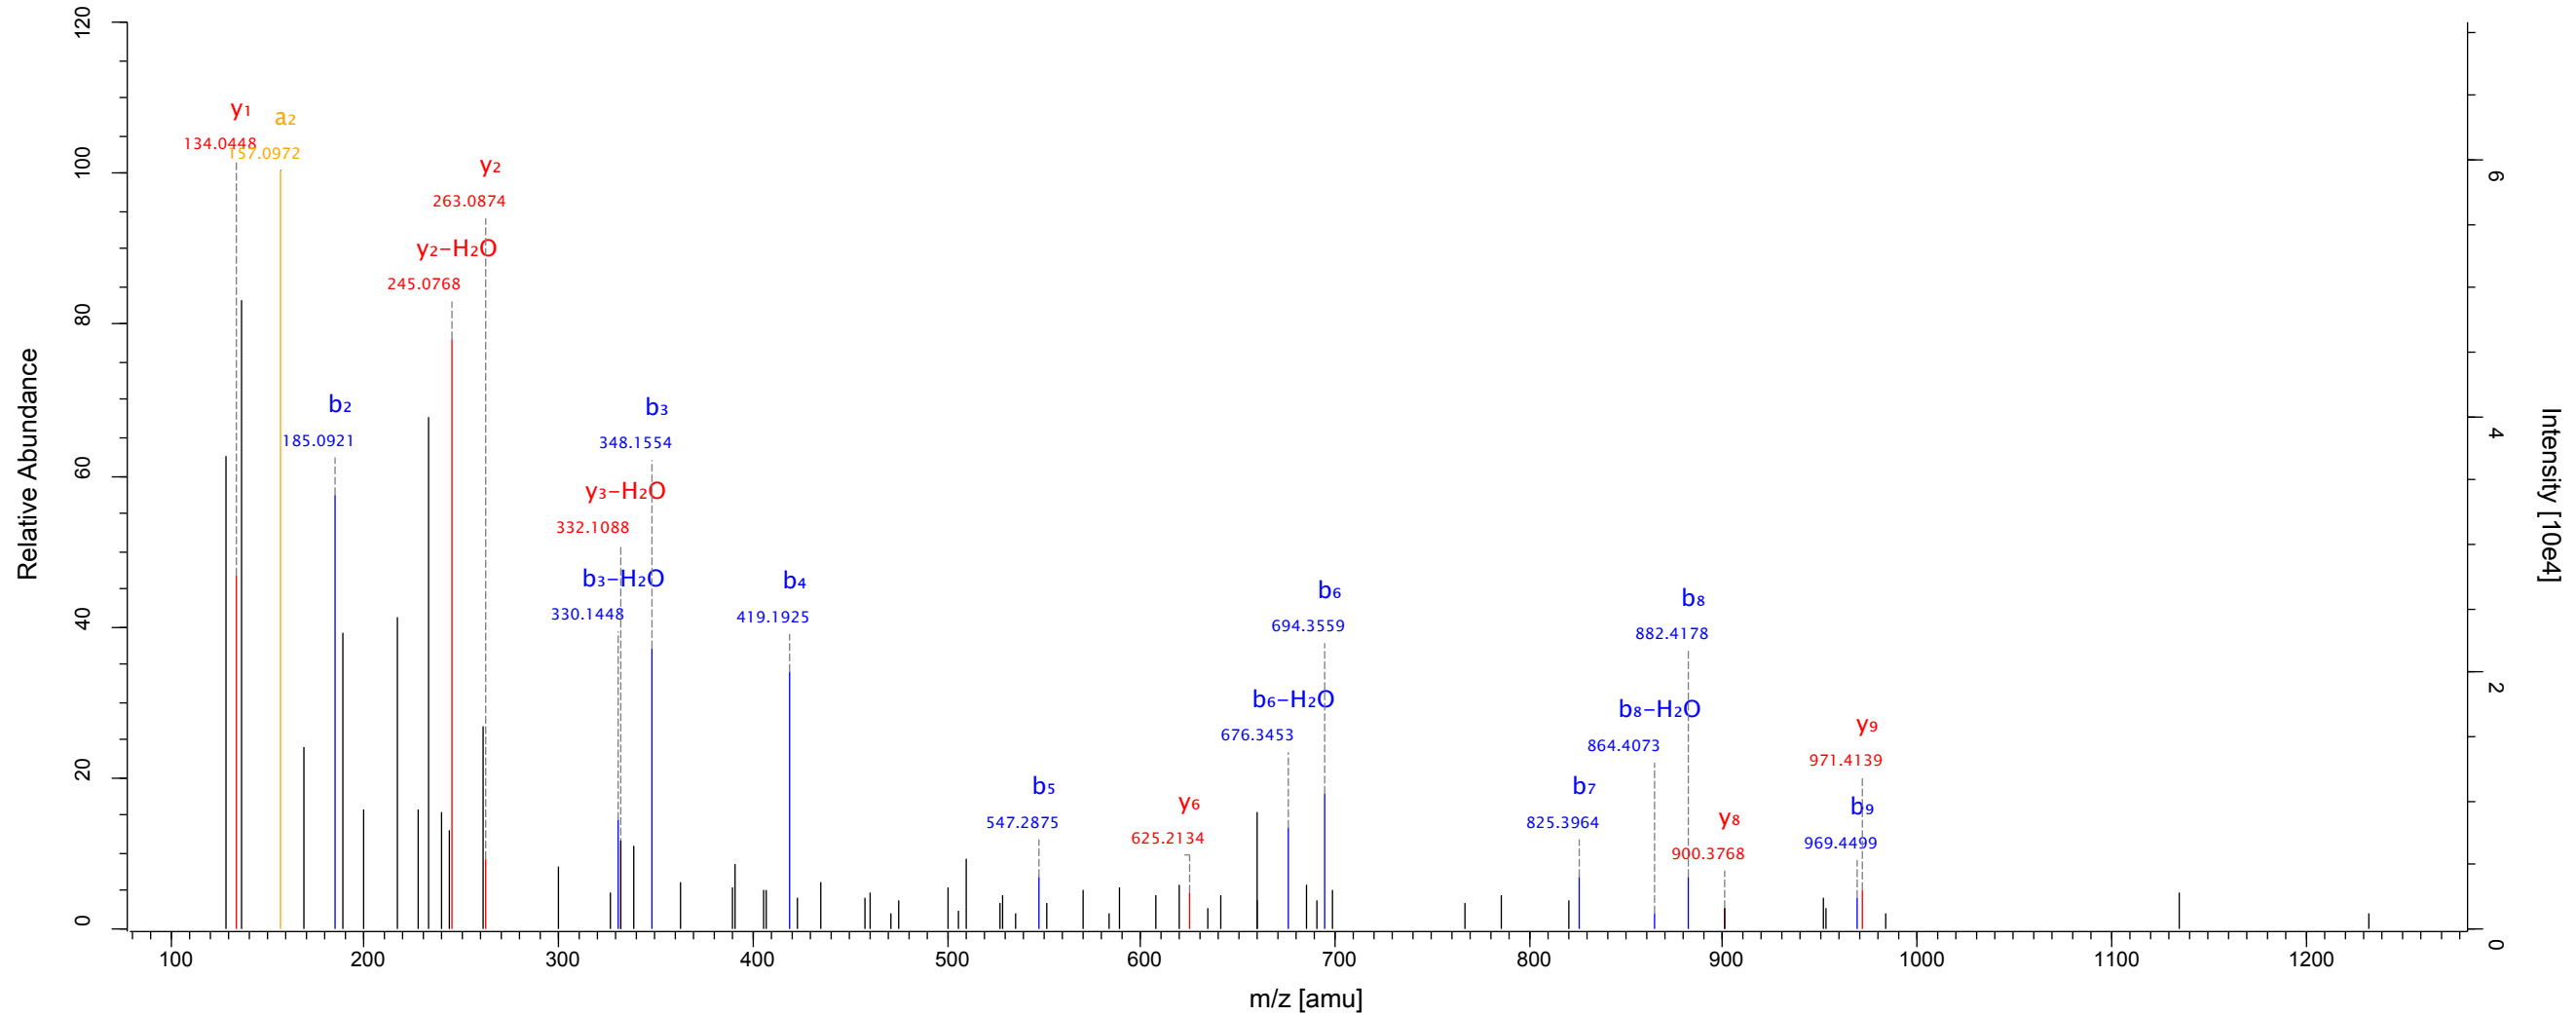

# peptide ID 115

Source: 20121106\_CO\_0340Gaje\_R02\_2  
Scannumber: 8215  
Protein: pep\_secretome\_1291; pep\_secretome\_1297; pep\_secretome\_27082; pep\_secretome\_27093  
Peptide Score: 78.34  
Method: FTMS; HCD; 1

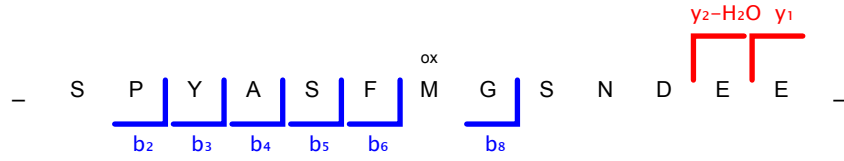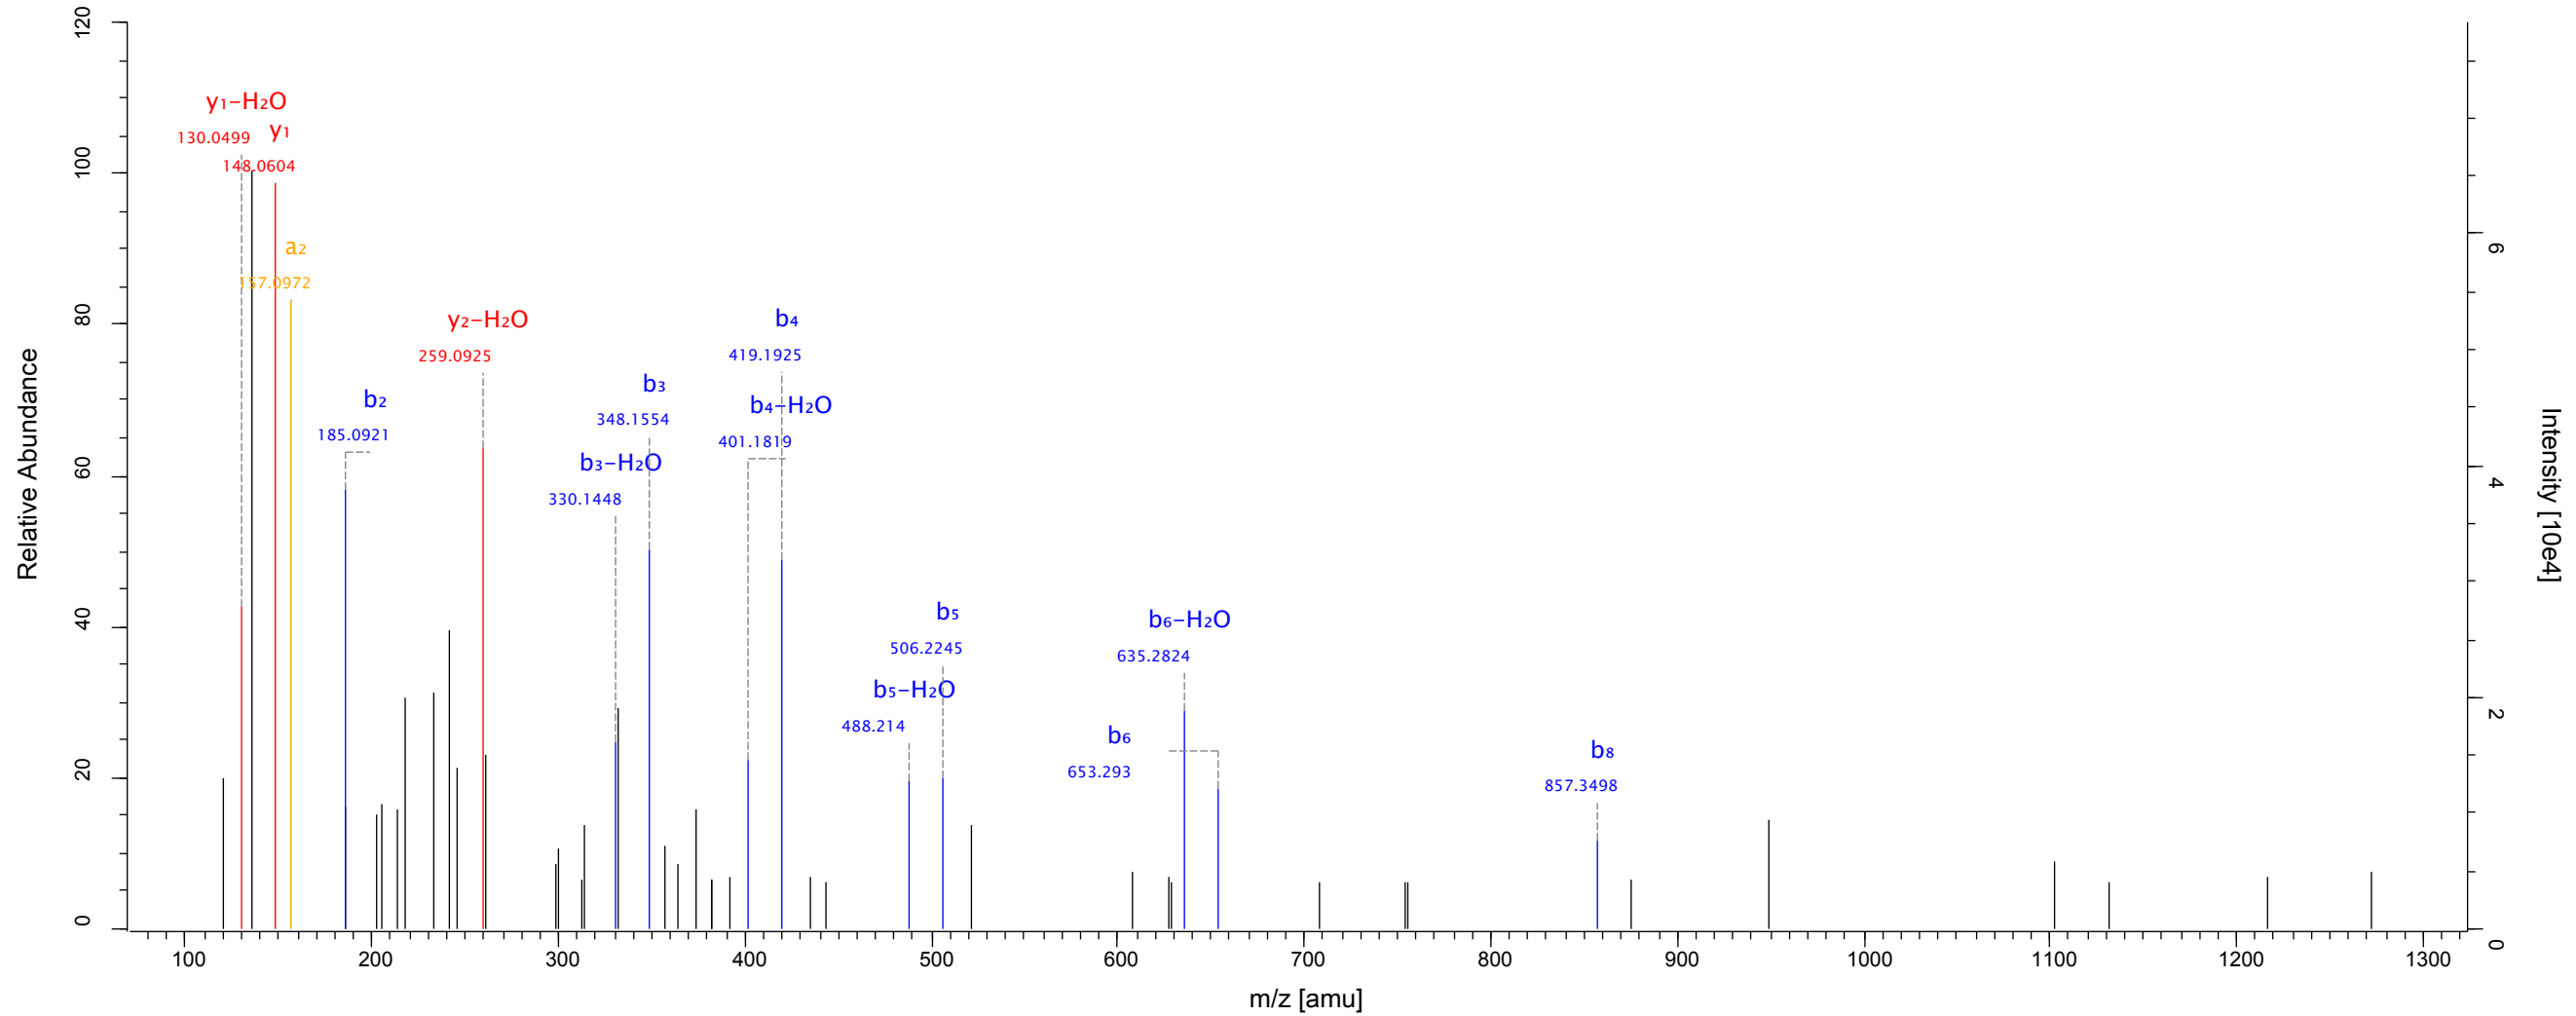

# peptide ID 116

Source: 20120515\_CO\_0340Gaje\_R01  
Scannumber: 12598  
Protein: pep\_secretome\_1292  
Peptide Score: 94.62  
Method: FTMS; HCD; 1

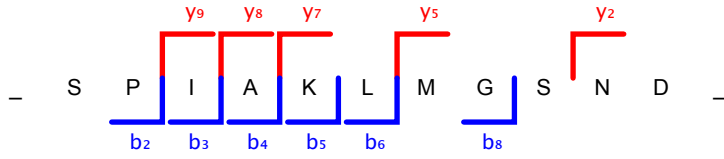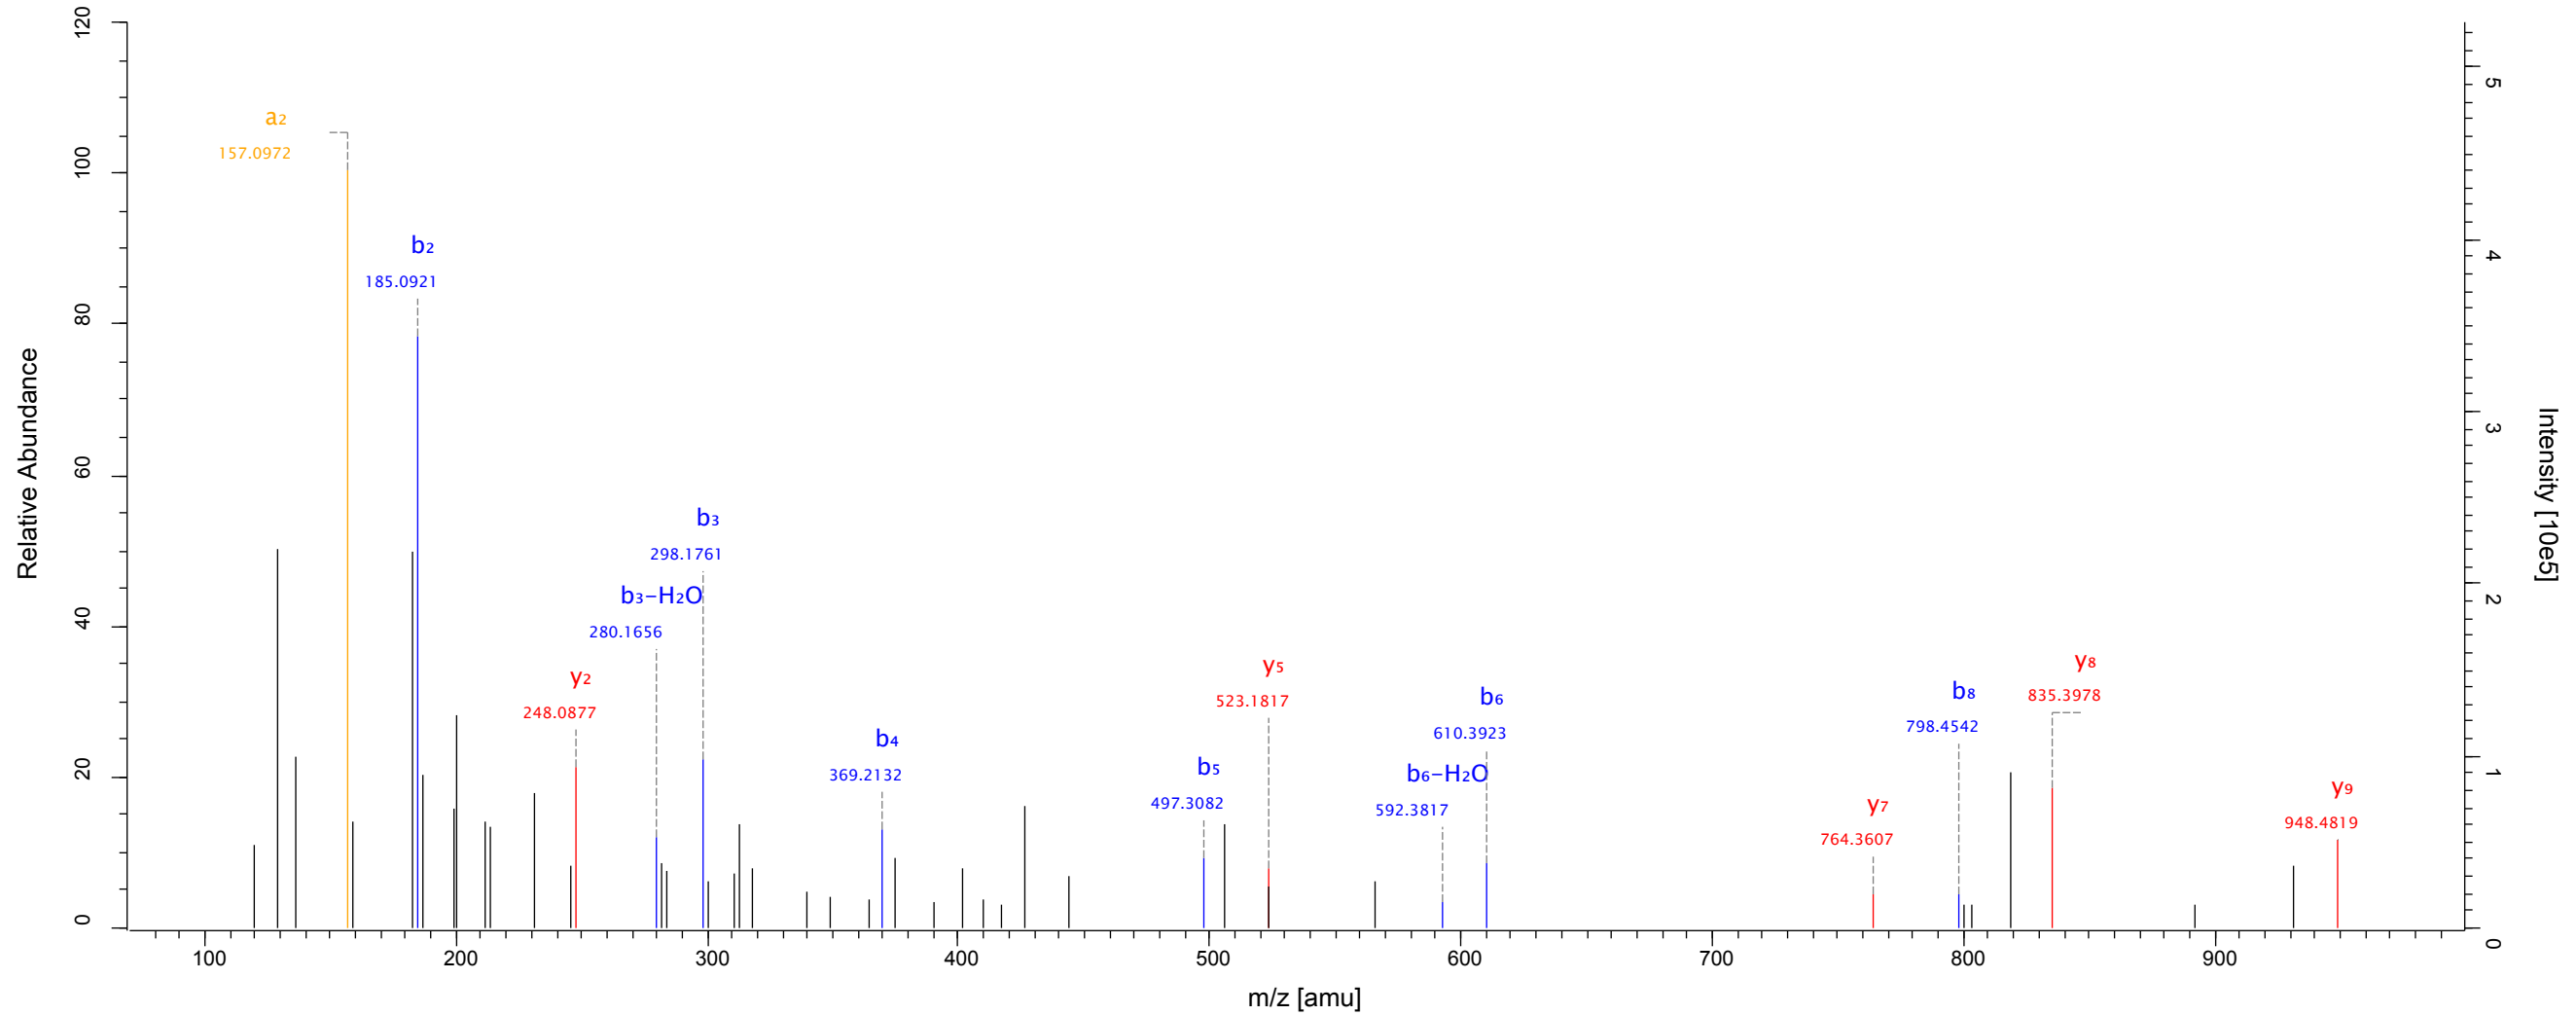



# peptide ID 117

Source: 20121106\_CO\_0340Gaje\_R02\_2  
Scannumber: 6535  
Protein: pep\_secretome\_1292  
Peptide Score: 97.73  
Method: FTMS; HCD; 1

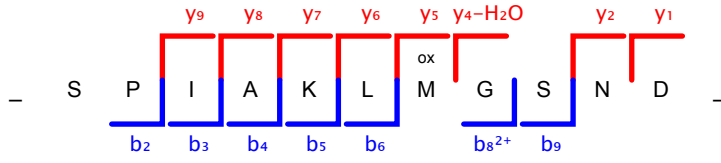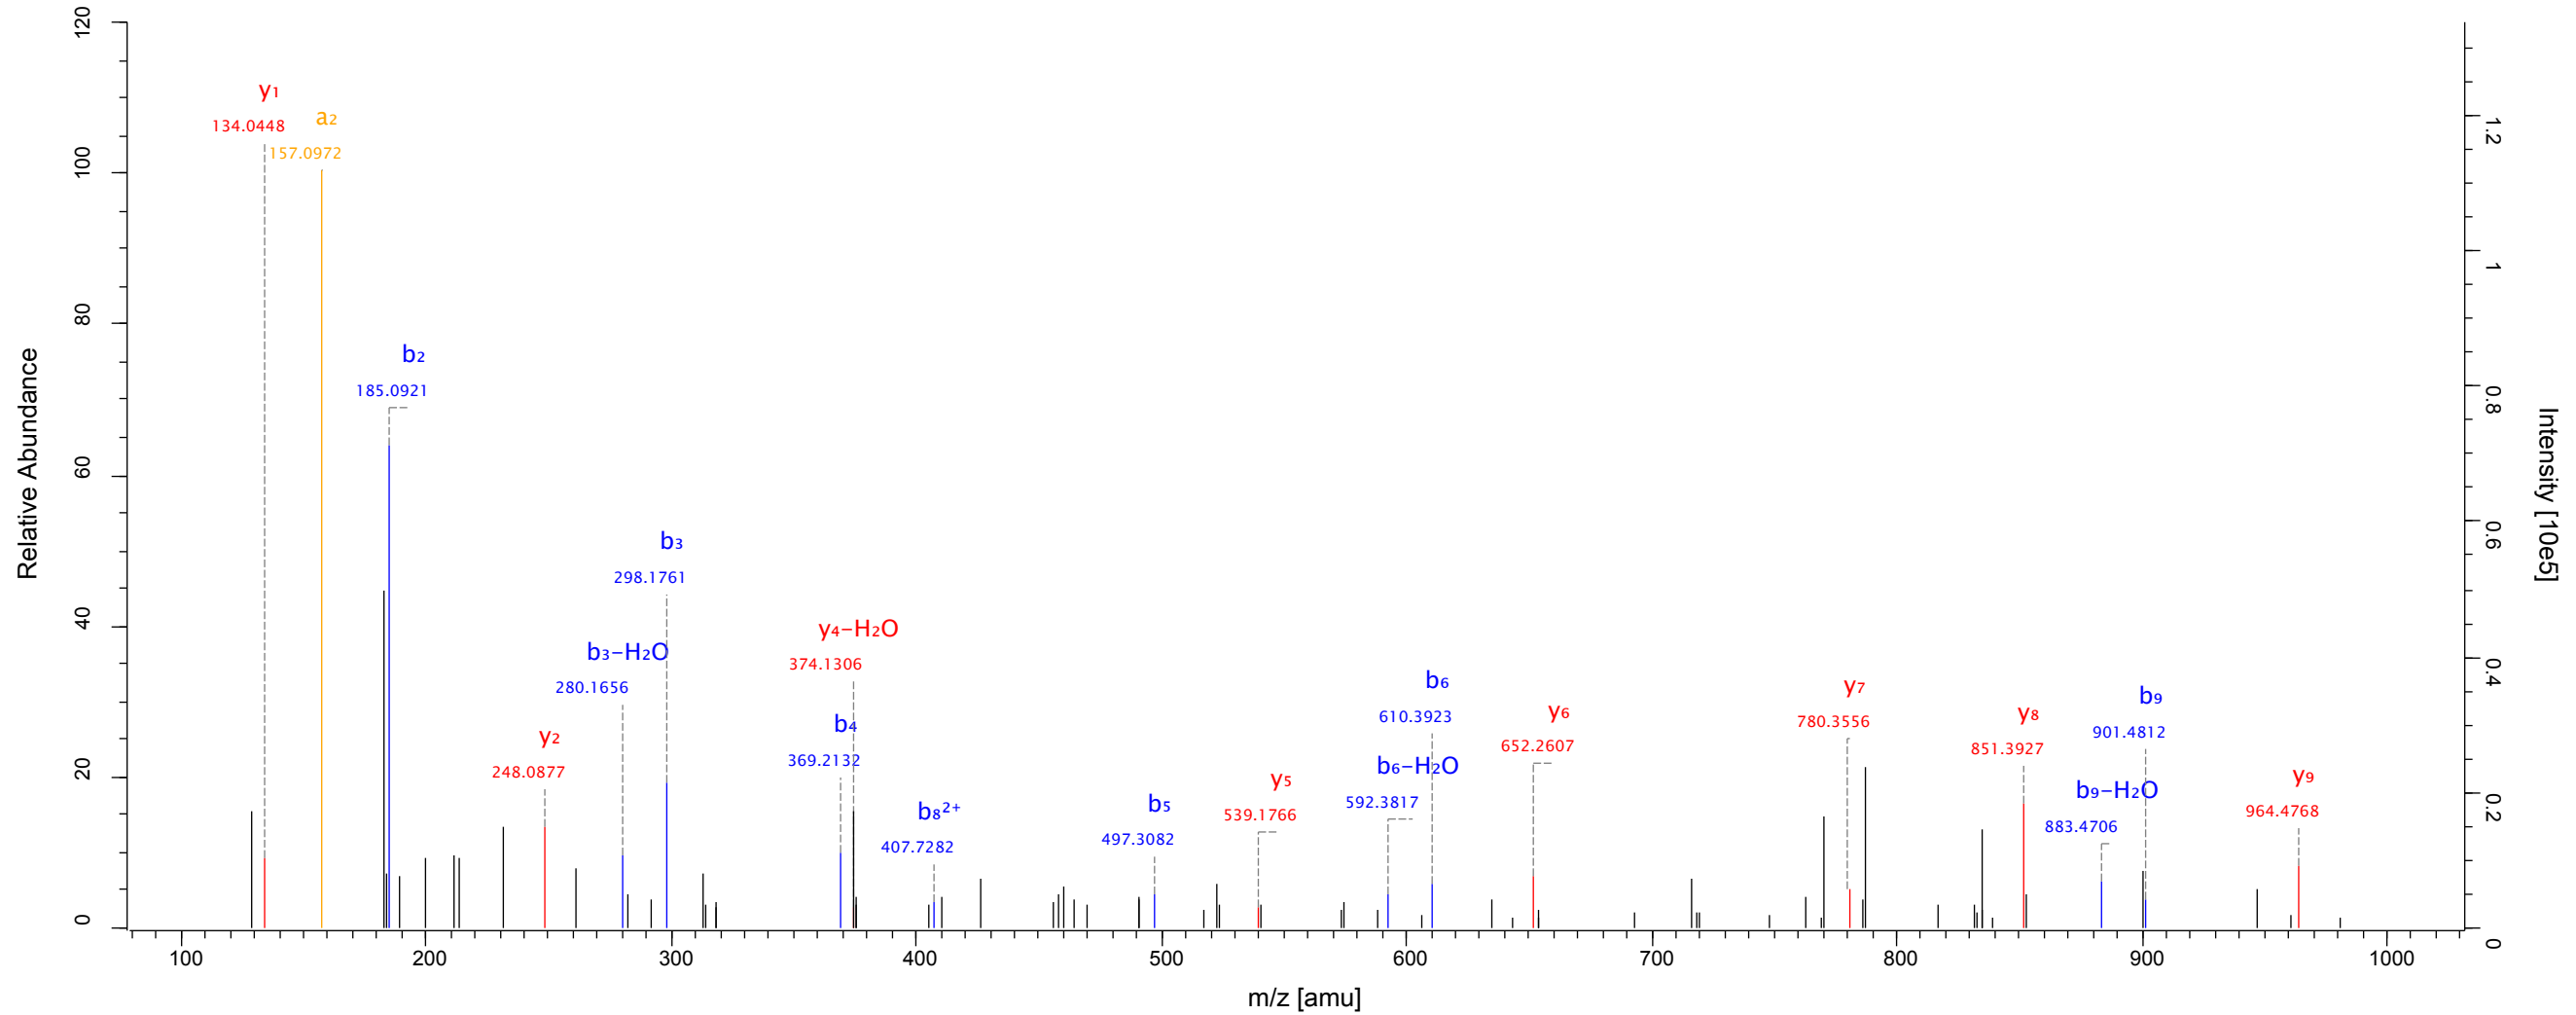

# peptide ID 118

Source: 20121106\_CO\_0340Gaje\_R02\_2  
Scannumber: 5579  
Protein: pep\_secretome\_1295  
Peptide Score: 76.66  
Method: FTMS; HCD; 1

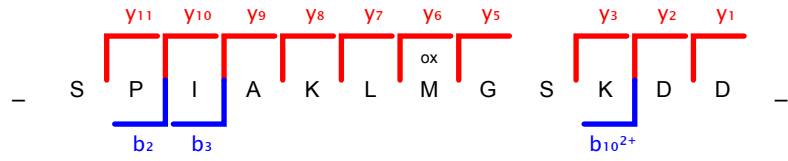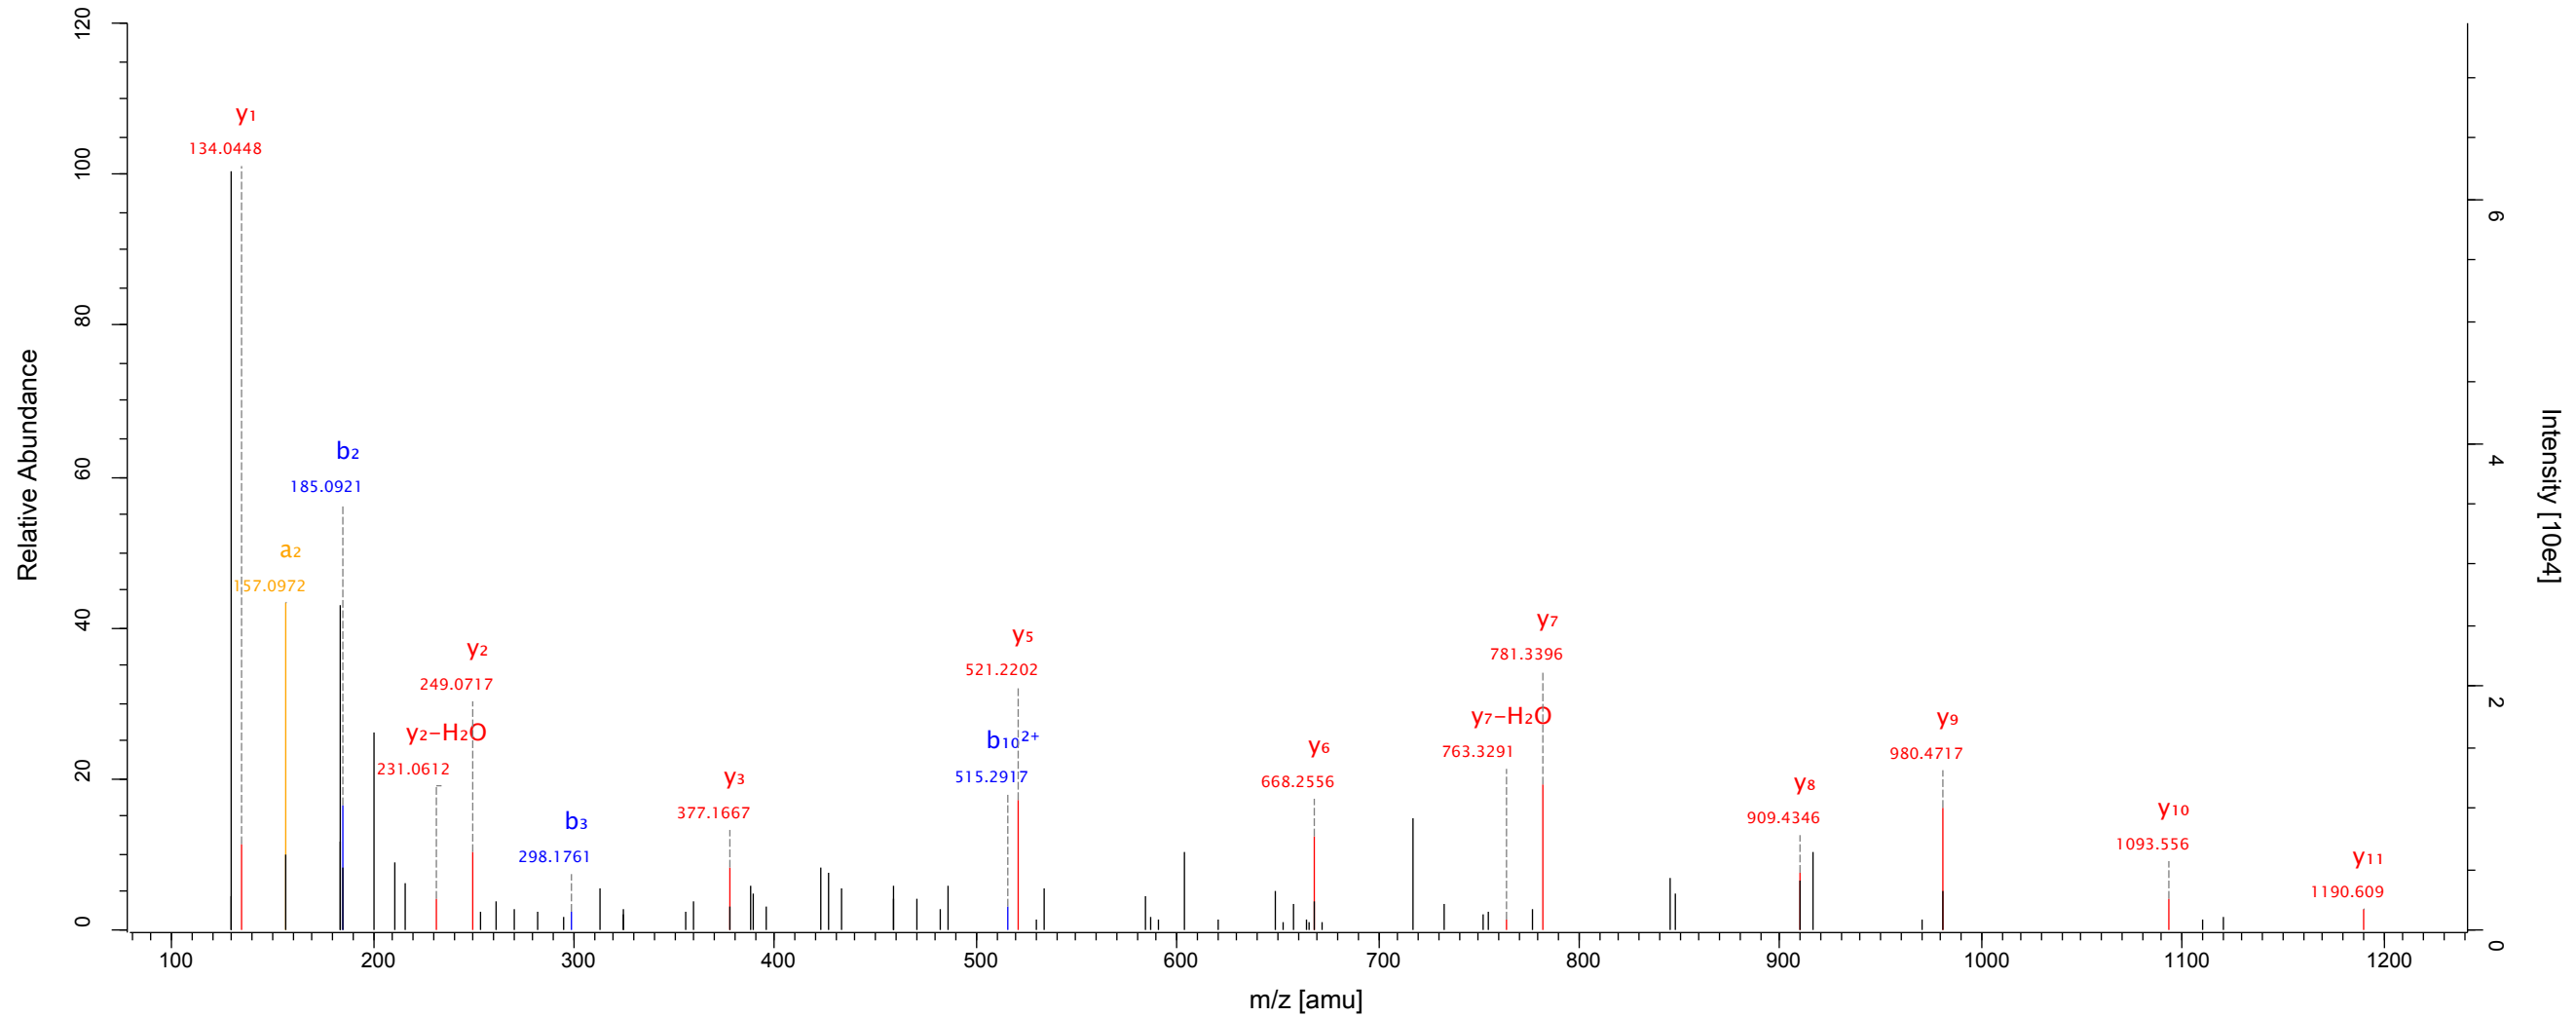

# peptide ID 119

Source: 20120816\_CO\_0340Gaje\_R02  
Scannumber: 10561  
Protein: pep\_secretome\_1298  
Peptide Score: 105.03  
Method: FTMS; HCD; 1

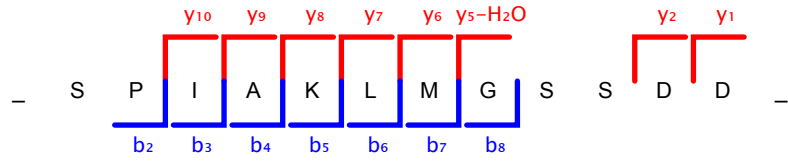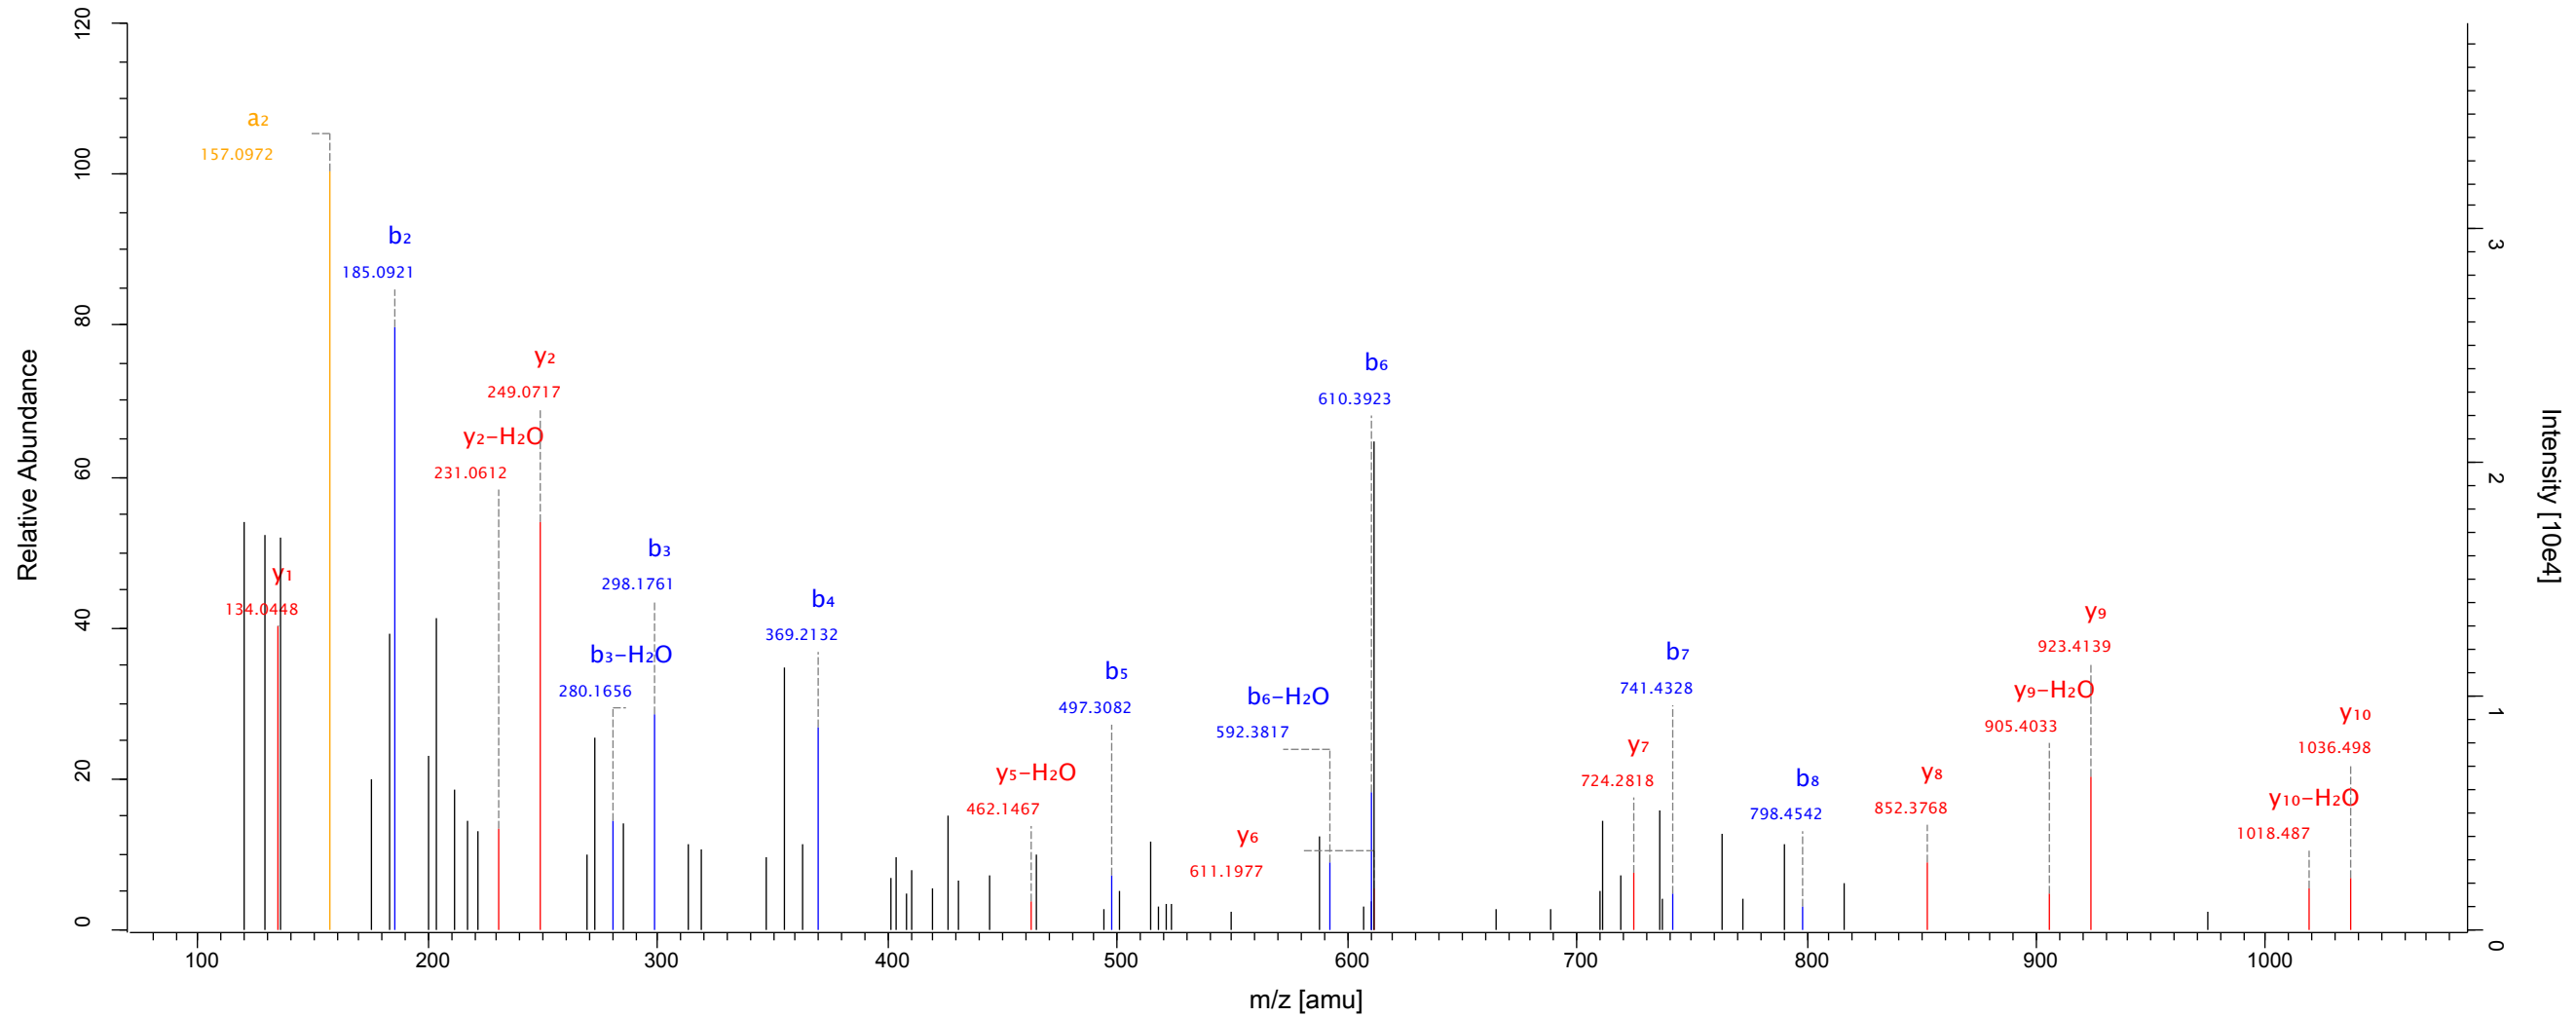

# peptide ID 120

Source: 20121106\_CO\_0340Gaje\_R02\_2  
Scannumber: 6727  
Protein: pep\_secretome\_1298  
Peptide Score: 98.16  
Method: FTMS; HCD; 1

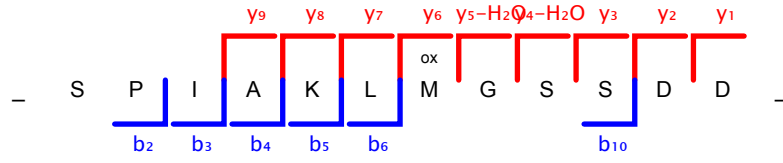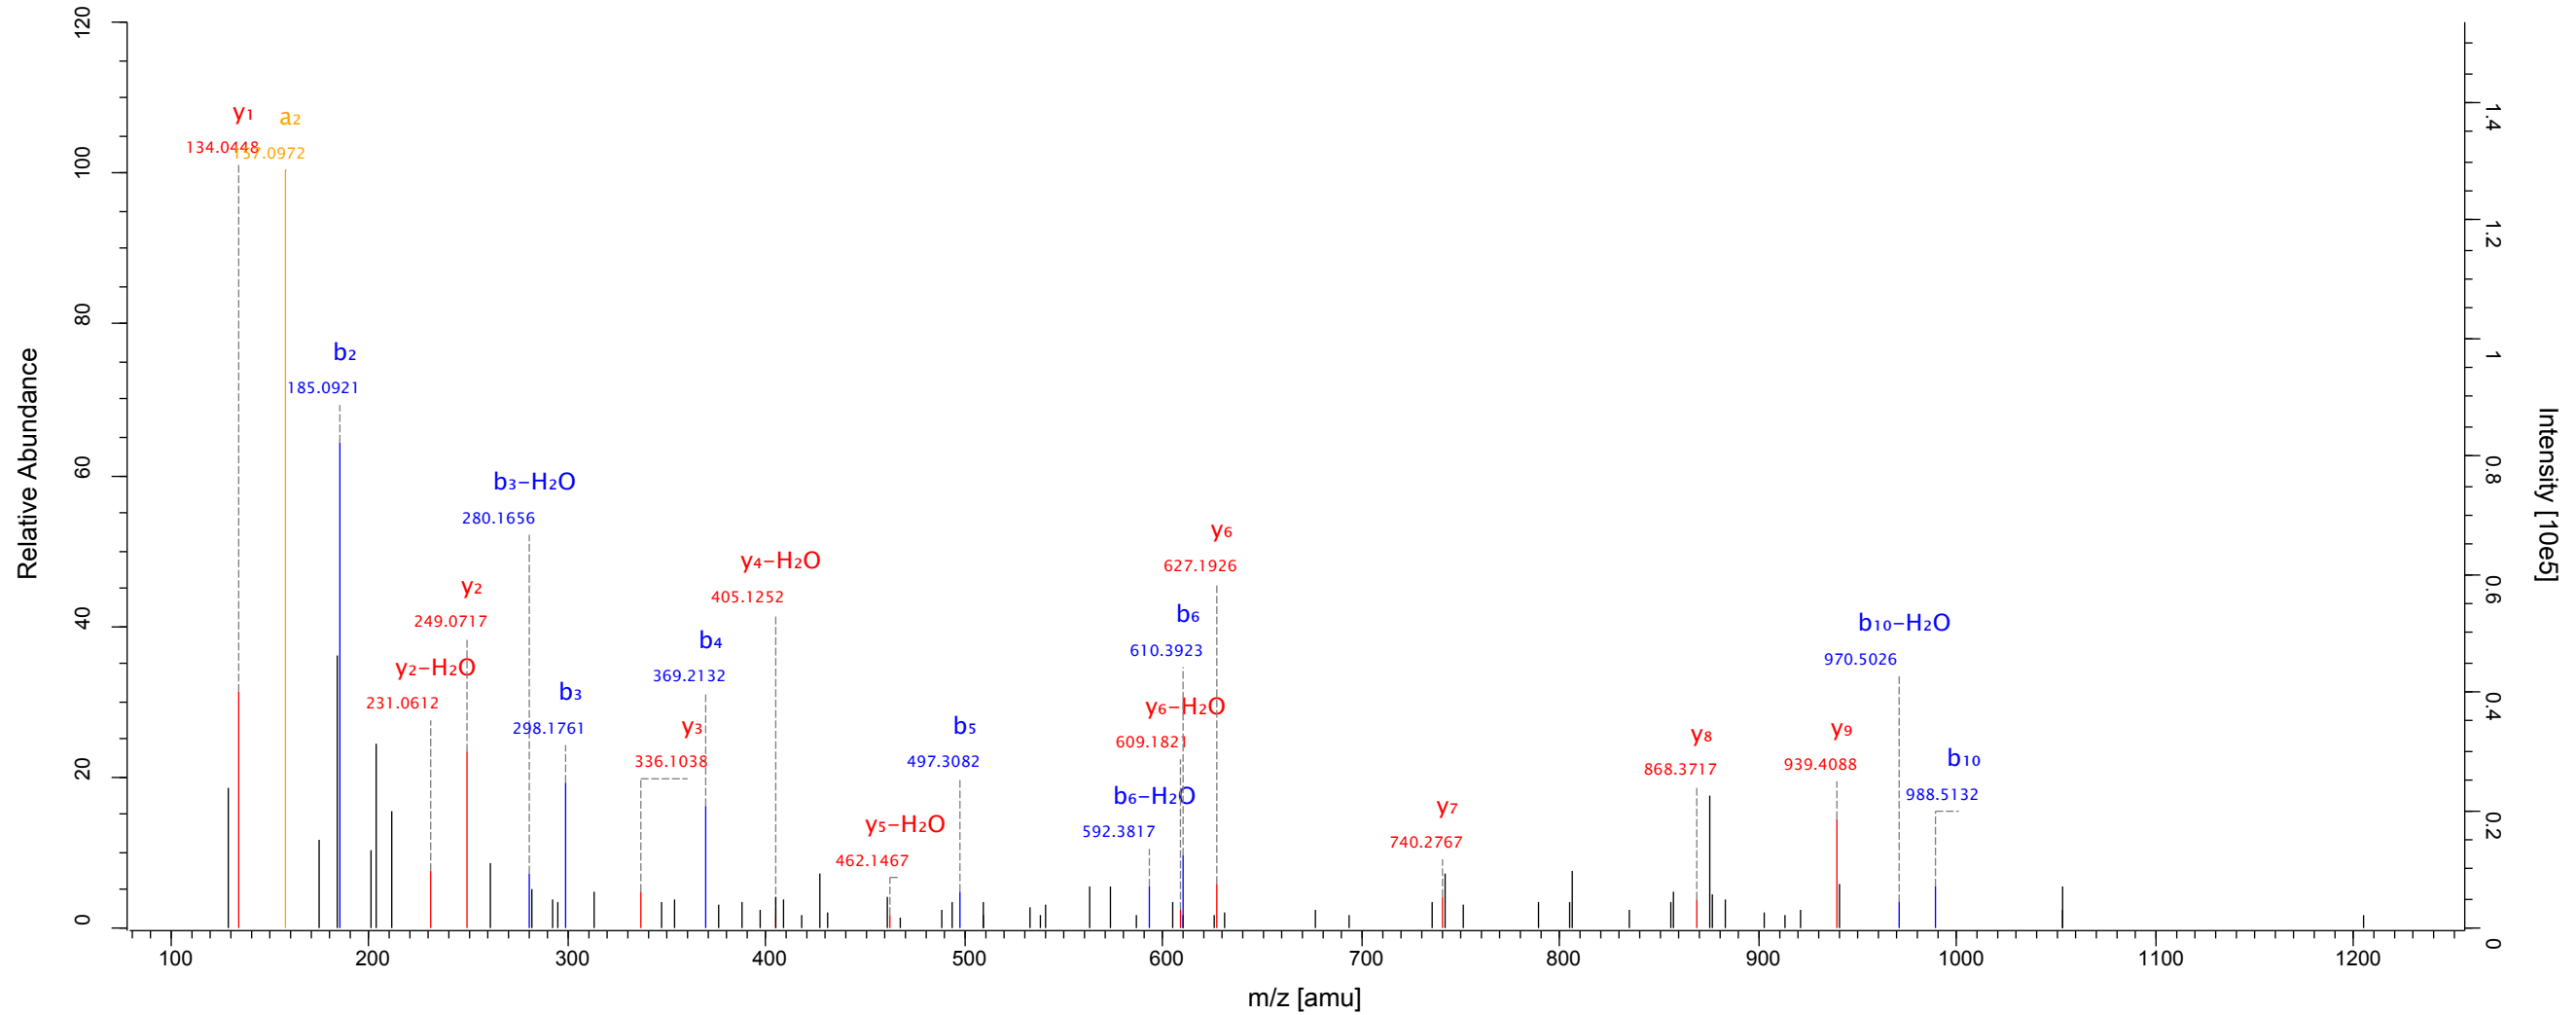

# peptide ID 121

Source: 20120816\_CO\_0340Gaje\_R02  
Scannumber: 9922  
Protein: pep\_229; pep\_secretome\_1304  
Peptide Score: 83.05  
Method: FTMS; HCD; 1

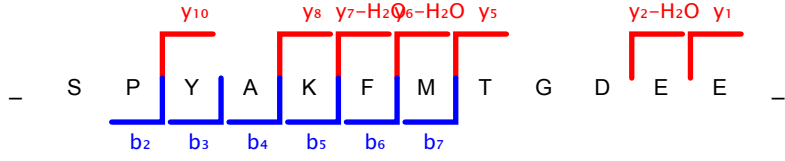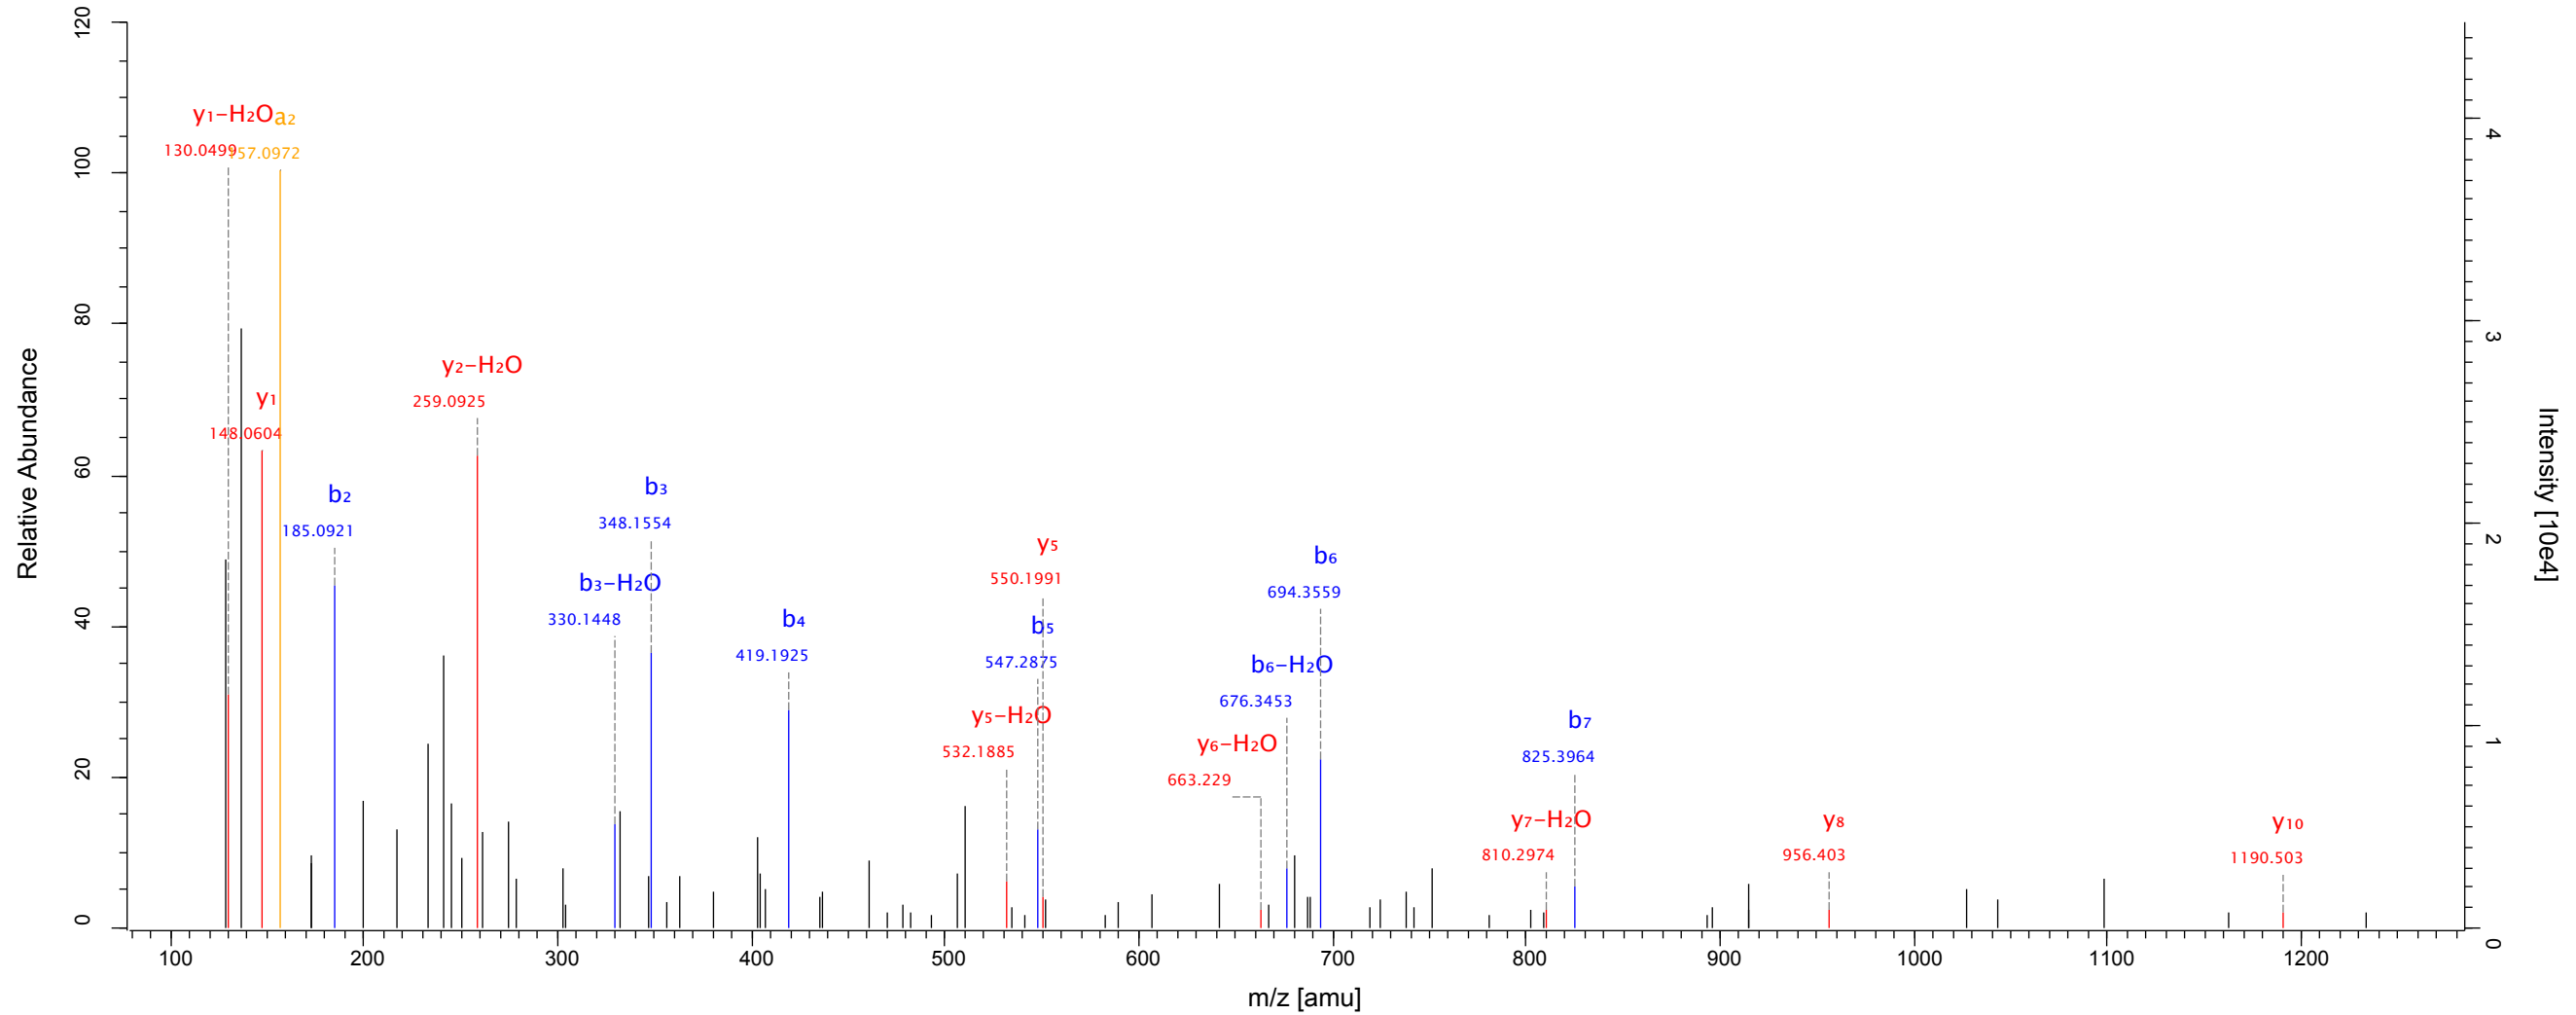

# peptide ID 122

Source: 20120816\_CO\_0340Gaje\_R02  
Scannumber: 7300  
Protein: pep\_229; pep\_secretome\_1304  
Peptide Score: 99.5  
Method: FTMS; HCD; 1

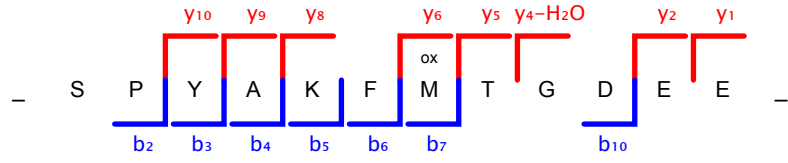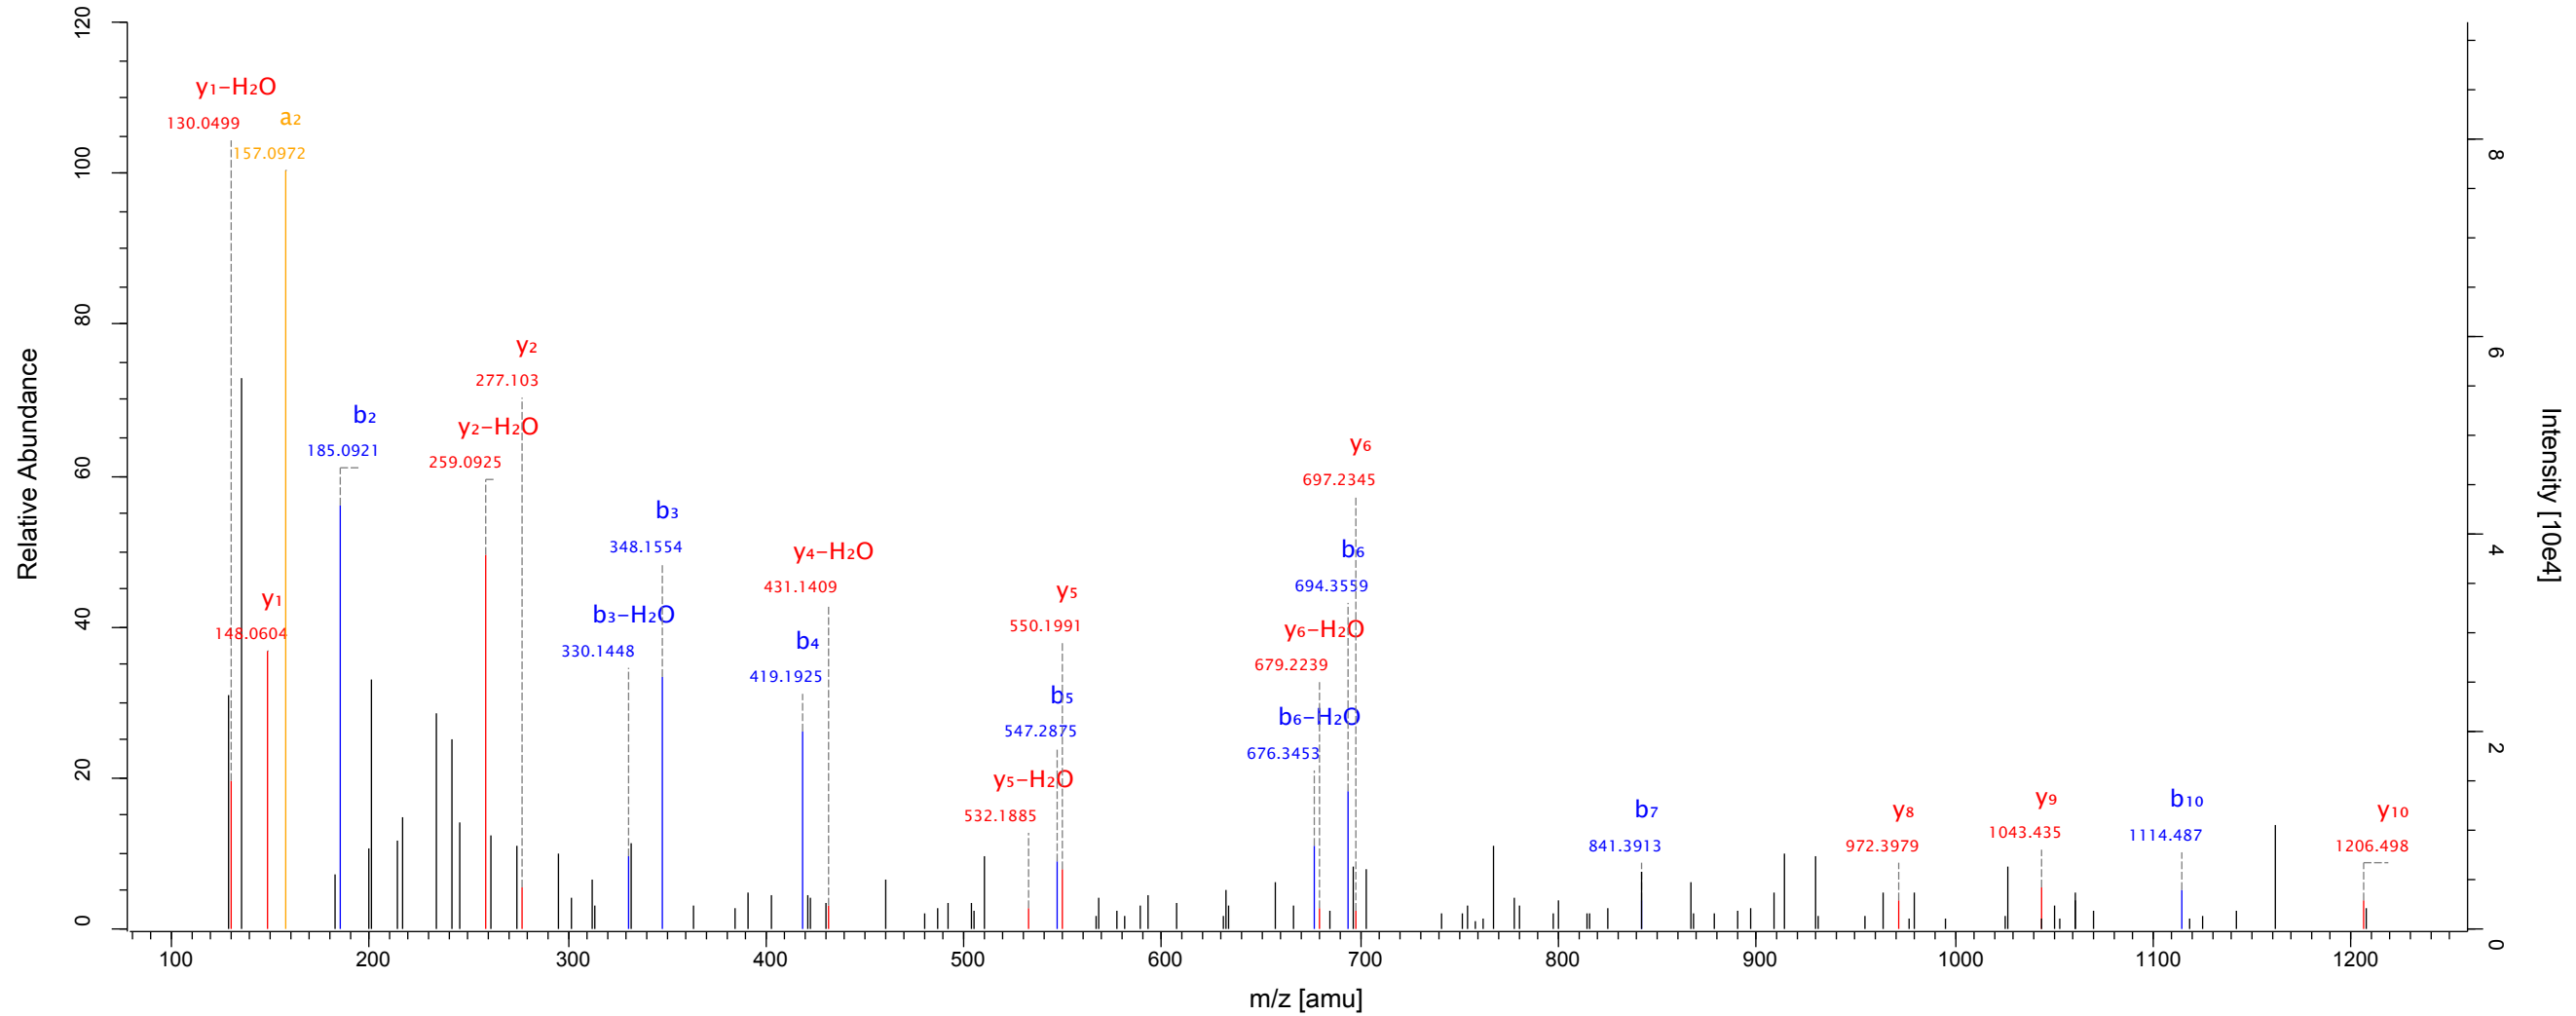

# peptide ID 123

Source: 20120816\_CO\_0340Gaje\_R02  
Scannumber: 9185  
Protein: pep\_231; pep\_secretome\_1306  
Peptide Score: 65.4  
Method: FTMS; HCD; 1

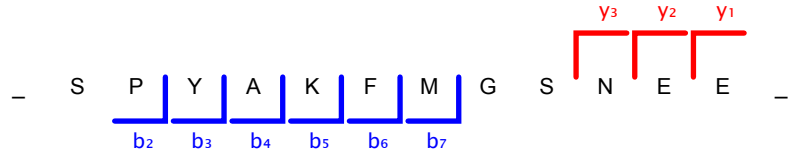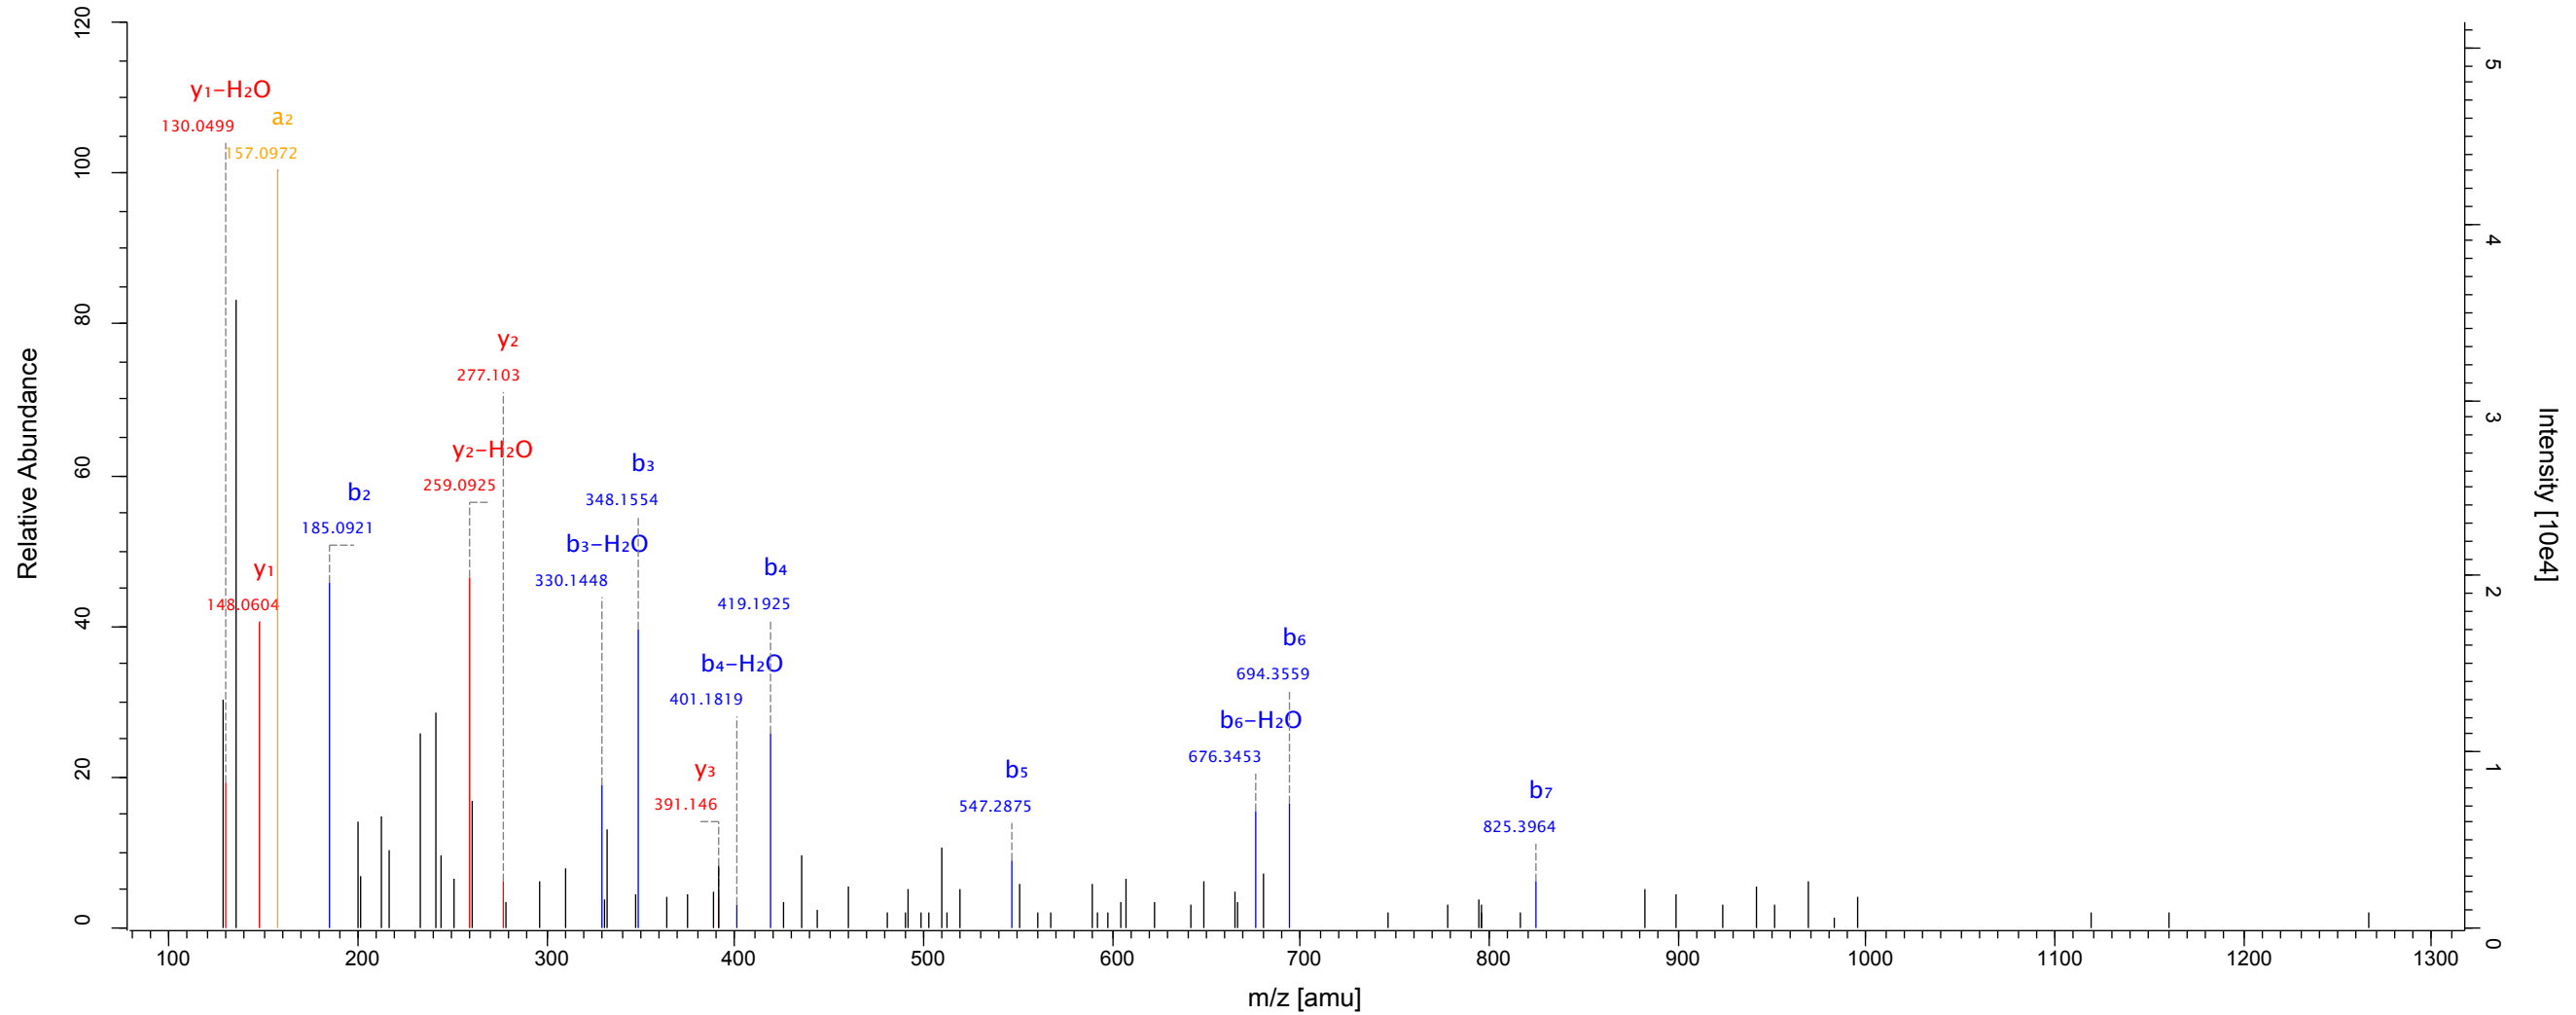

# peptide ID 124

Source: 20120816\_CO\_0340Gaje\_R02  
Scannumber: 10509  
Protein: pep\_secretome\_1310  
Peptide Score: 83.87  
Method: FTMS; HCD; 1

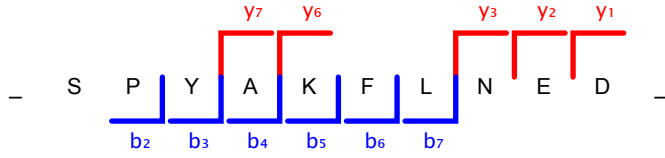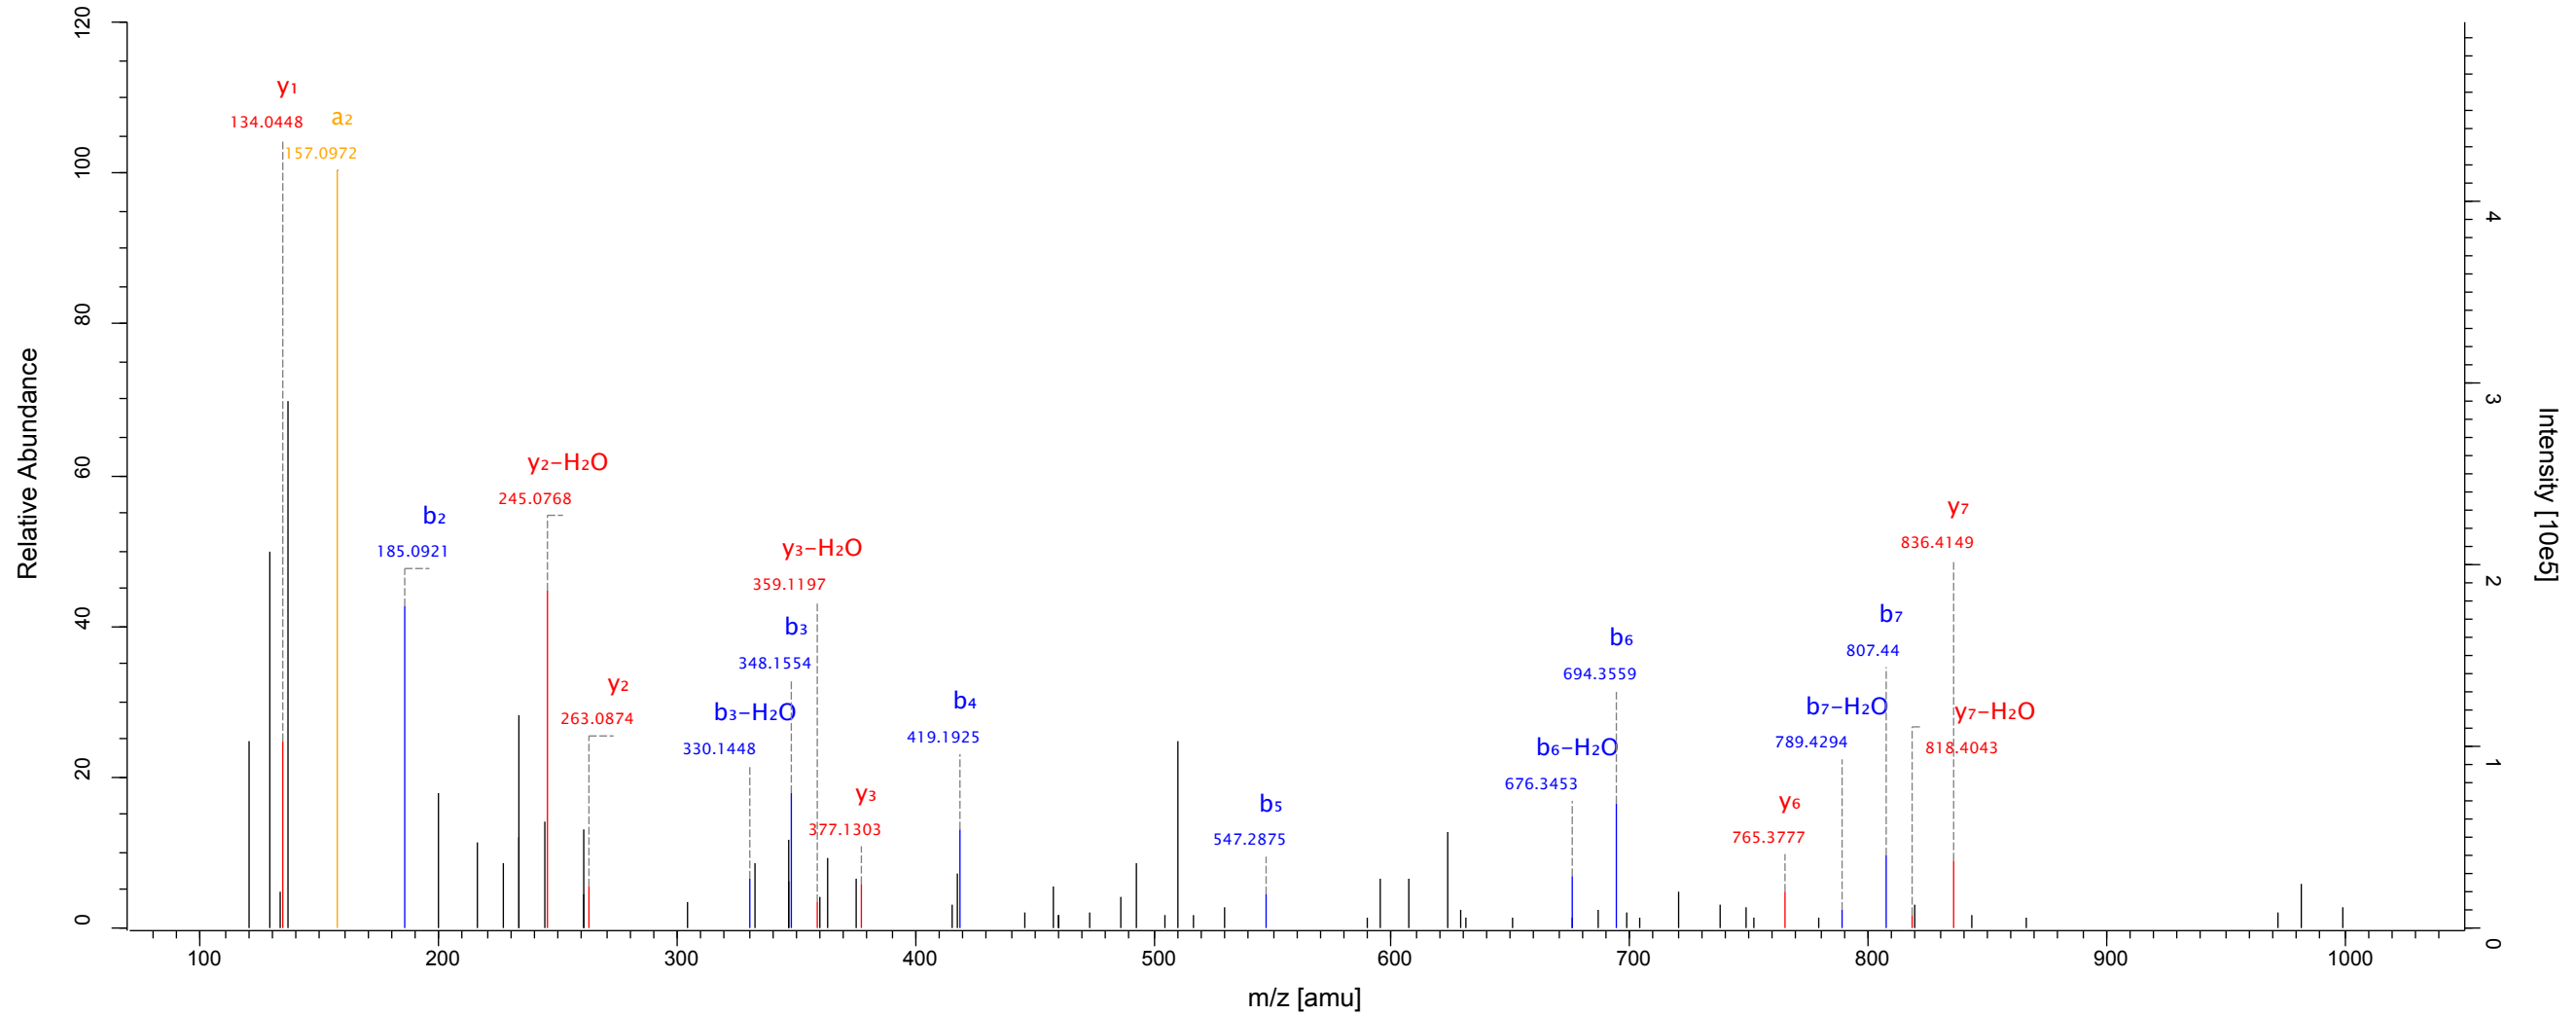



# peptide ID 125

Source: 20120816\_CO\_0340Gaje\_R02  
Scannumber: 15129  
Protein: pep\_30; pep\_secretome\_79  
Peptide Score: 31.82  
Method: FTMS; HCD; 1

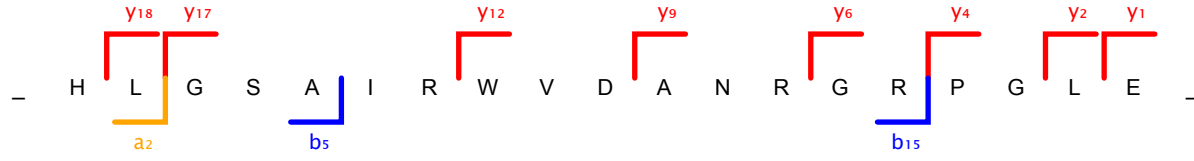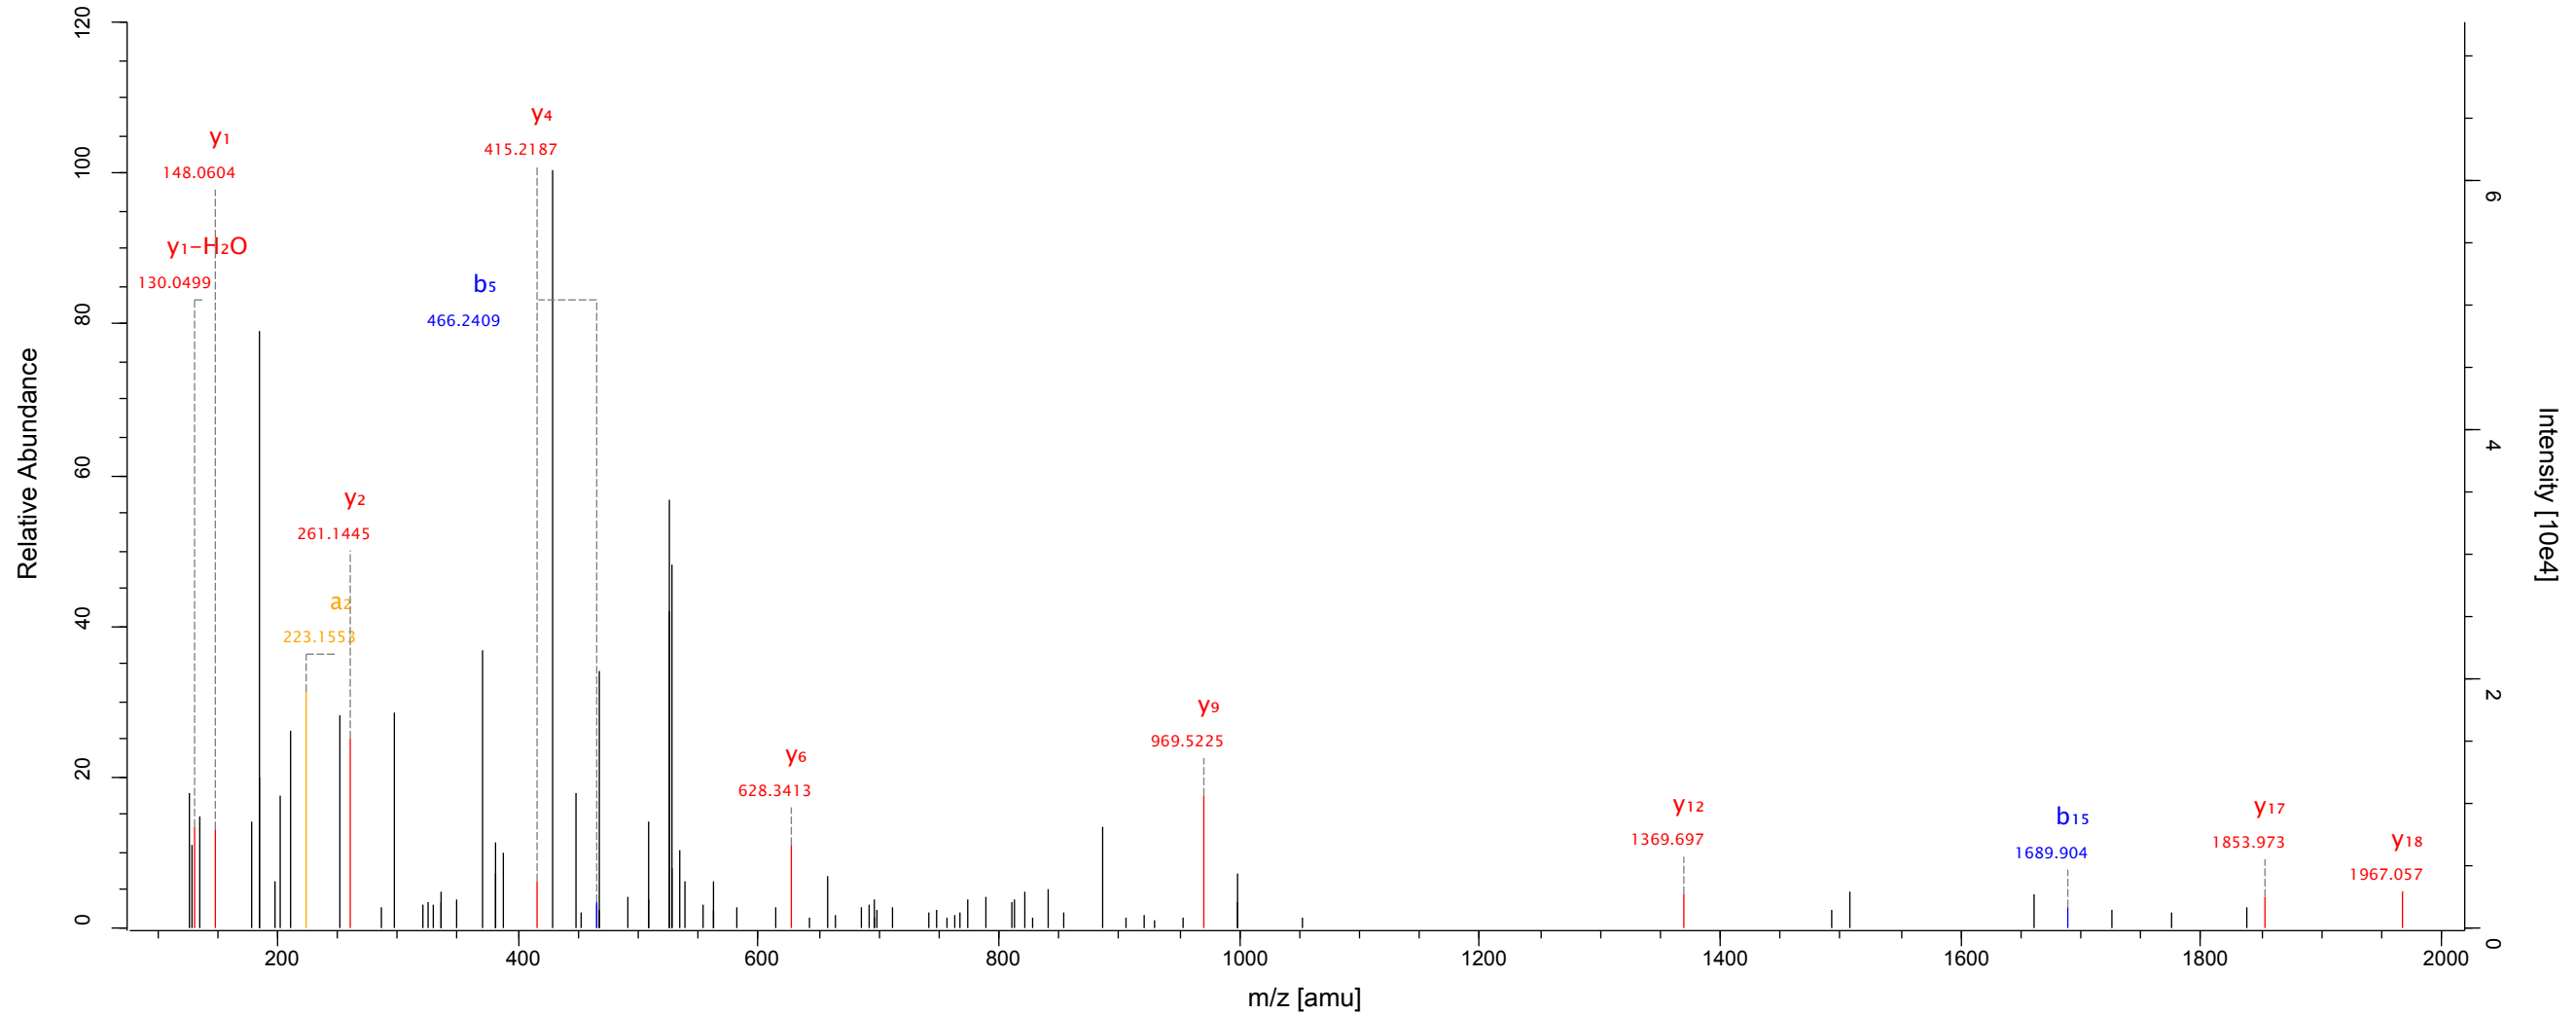

# peptide ID 126

Source: 20121106\_CO\_0340Gaje\_R02\_2  
Scannumber: 6318  
Protein: pep\_47; pep\_secretome\_22721; pep\_secretome\_96  
Peptide Score: 75.46  
Method: FTMS; HCD; 1

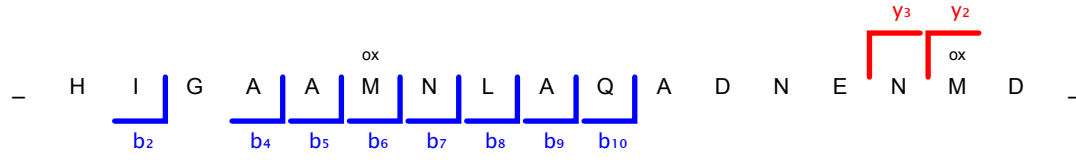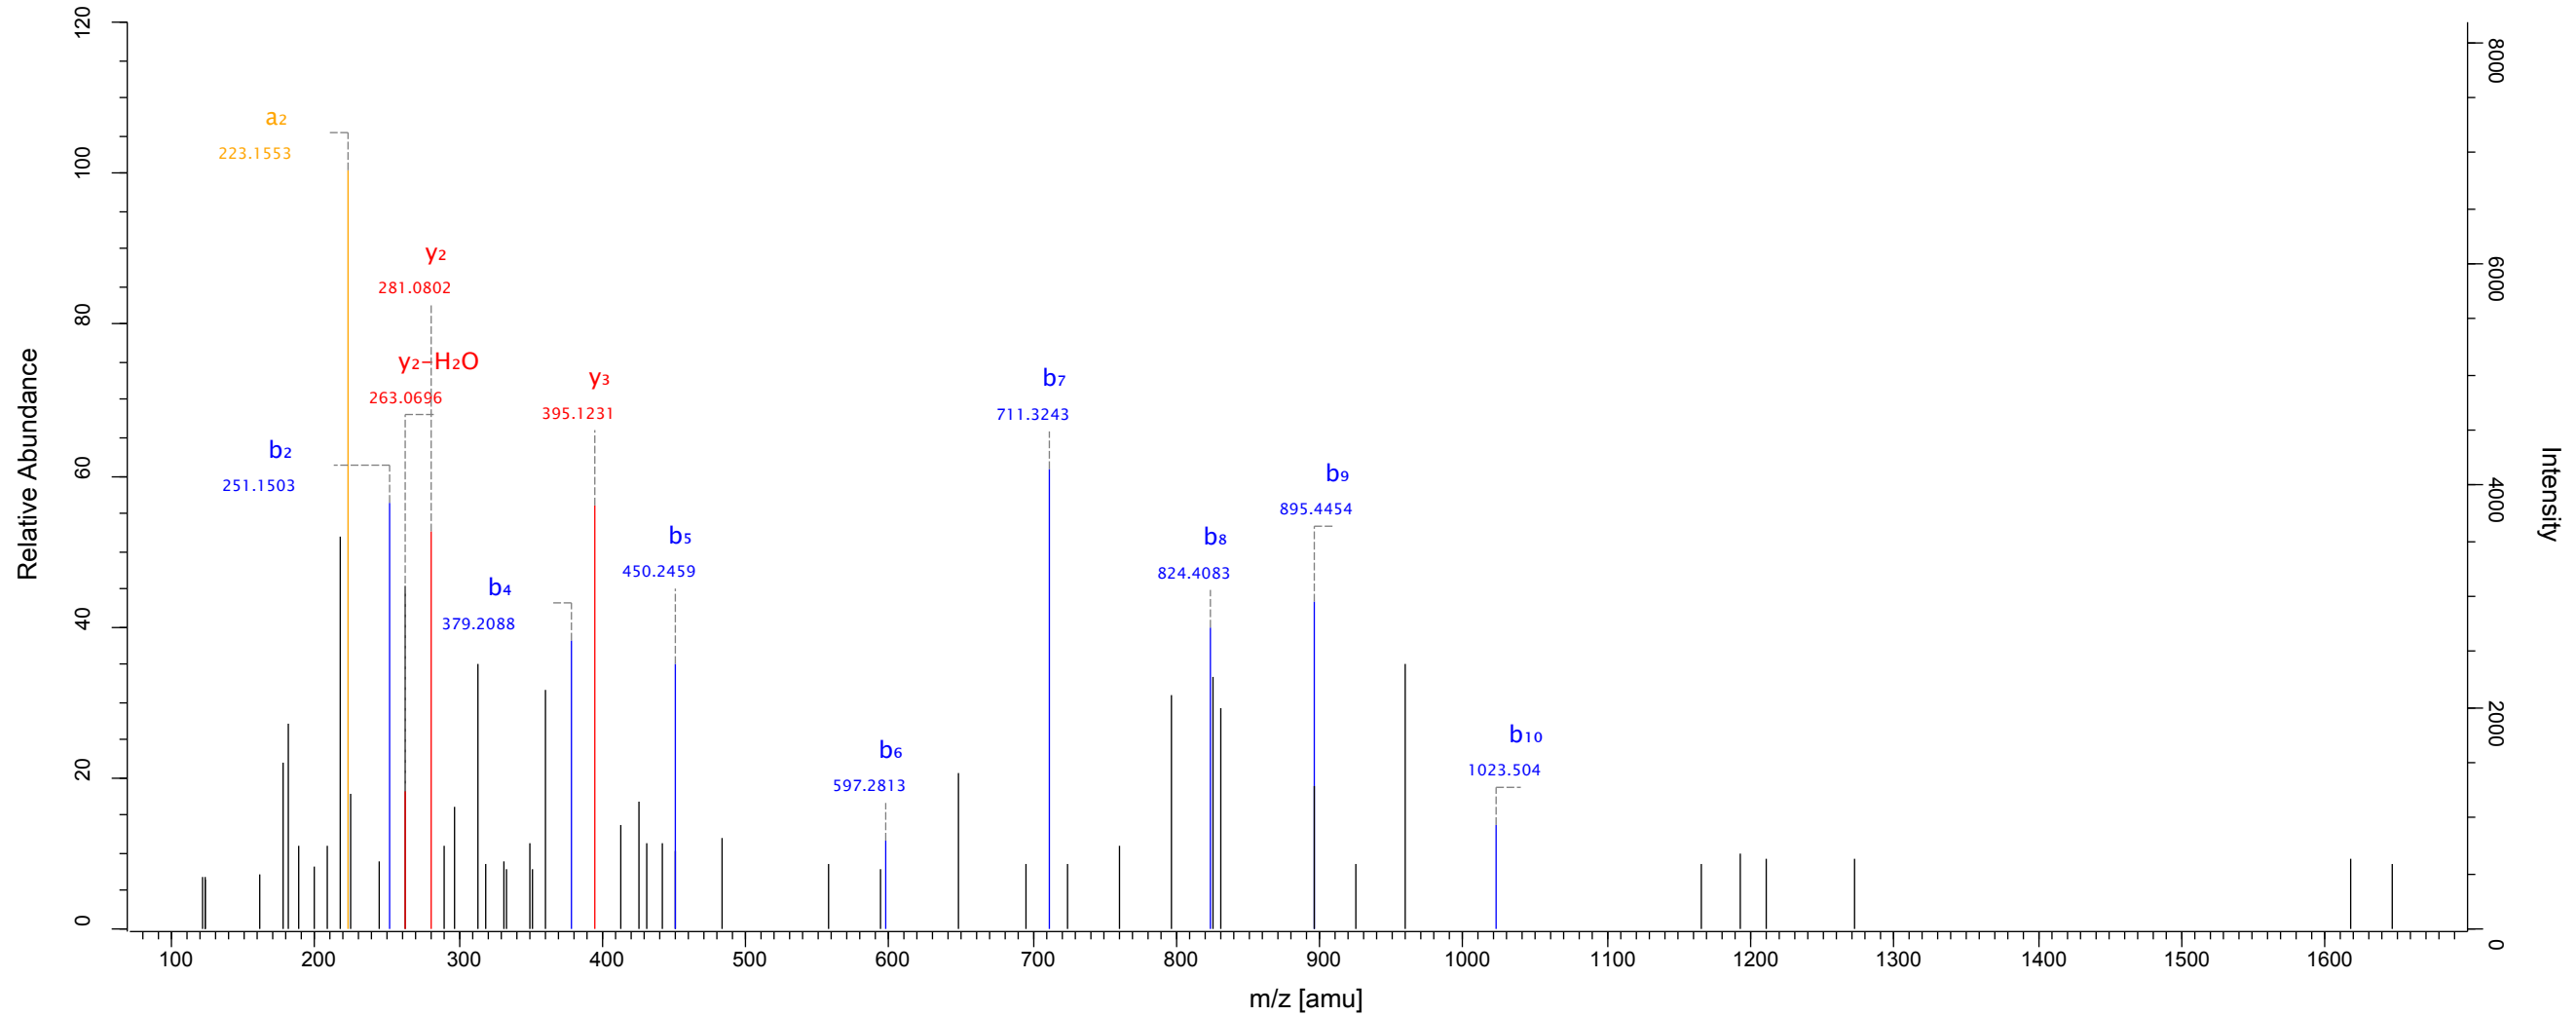

# peptide ID 127

Source: 20120816\_CO\_0340Gaje\_R02  
Scannumber: 9363  
Protein: pep\_49; pep\_secretome\_98  
Peptide Score: 34.91  
Method: FTMS; HCD; 1

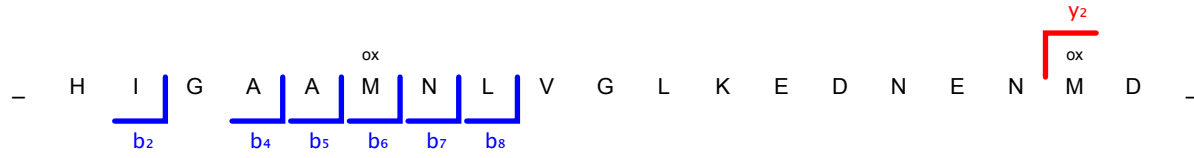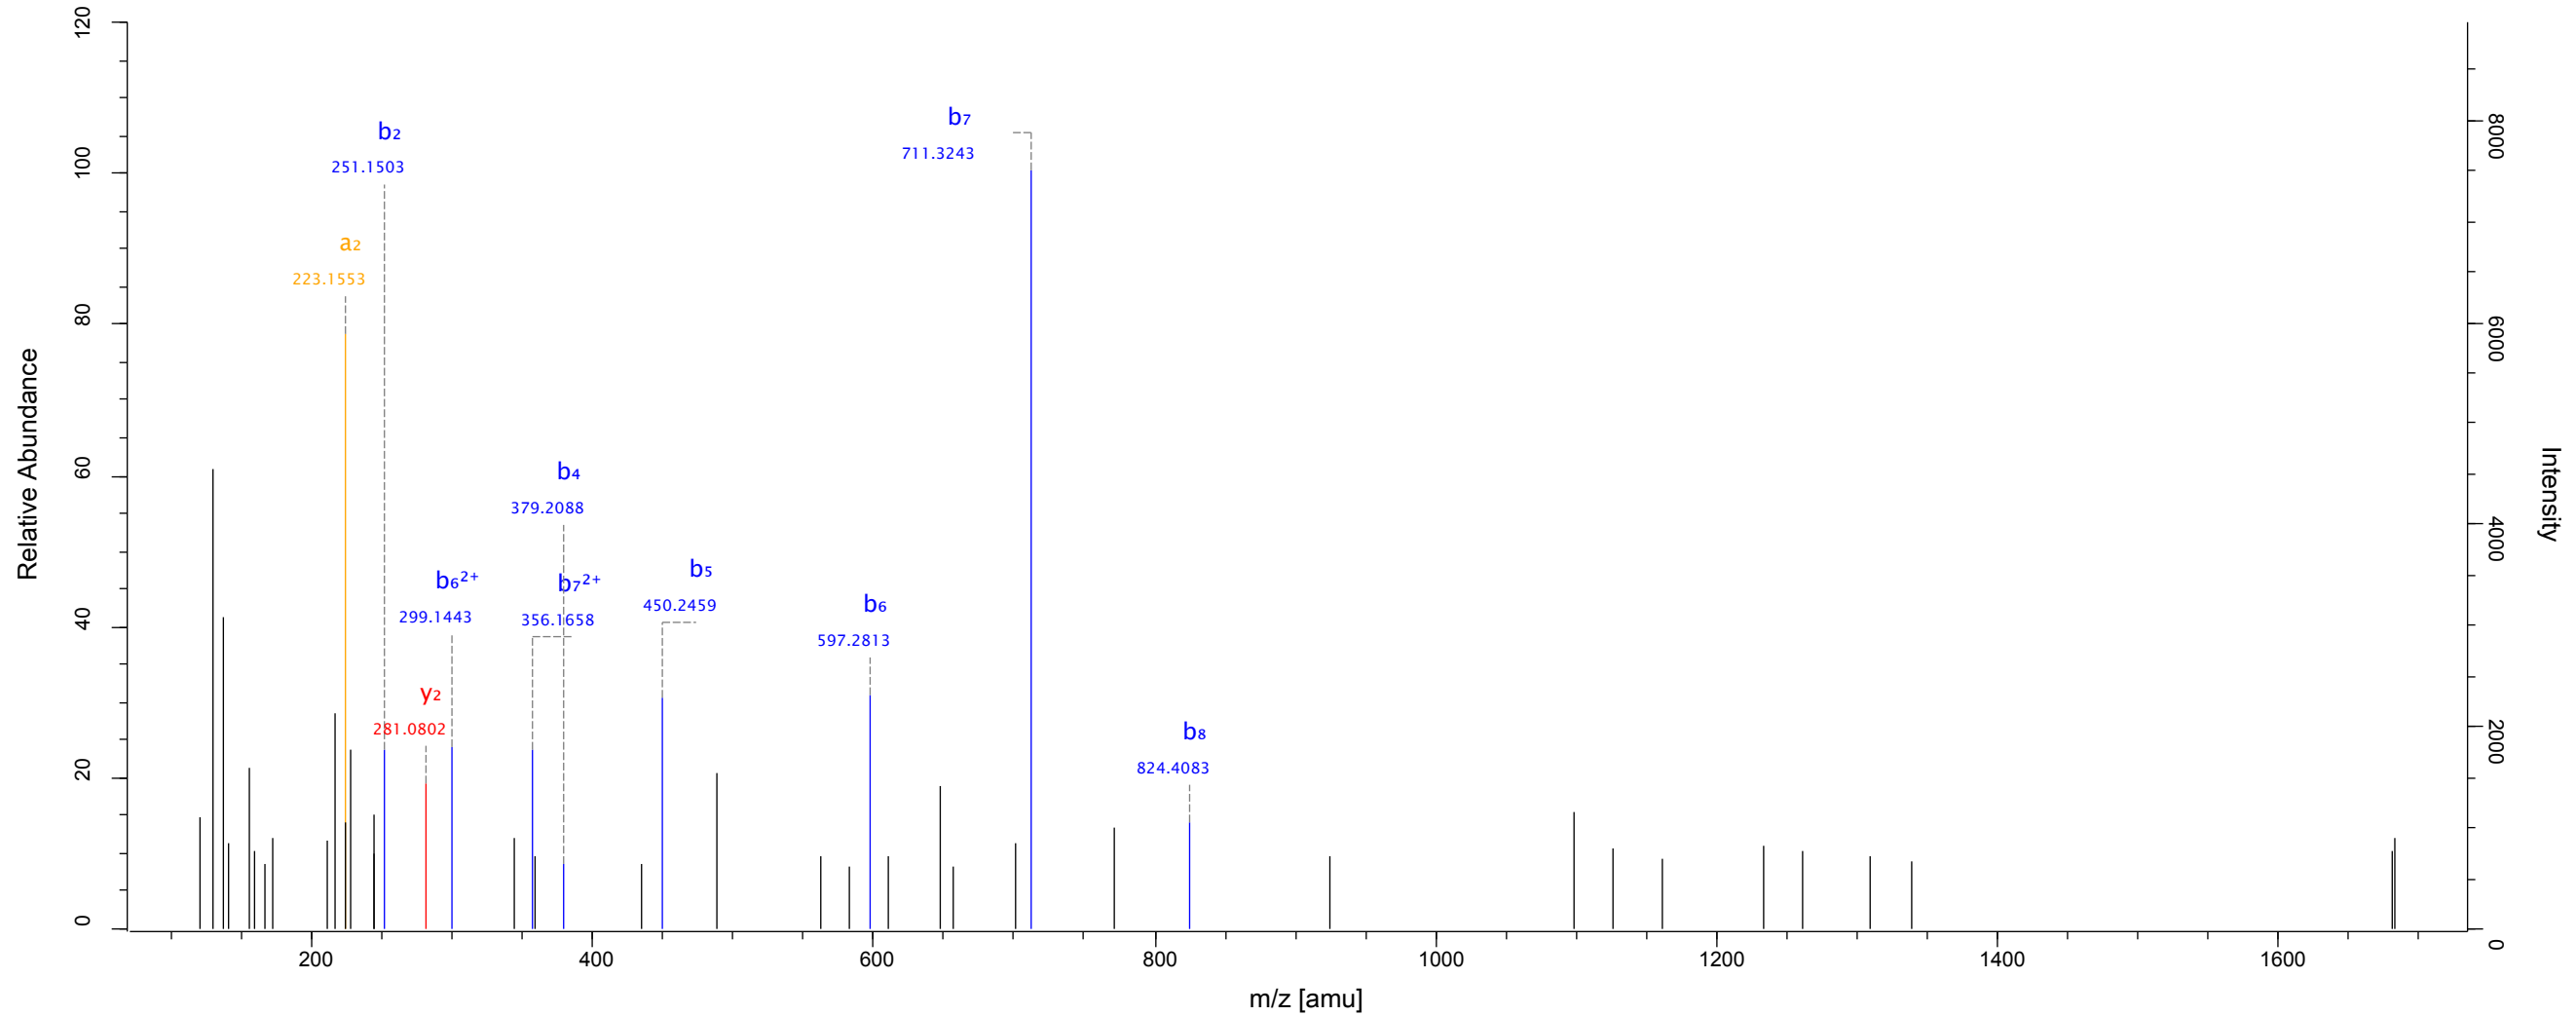

# peptide ID 128

Source: 20120816\_CO\_0340Gaje\_R02  
Scannumber: 7113  
Protein: pep\_59; pep\_secretome\_108  
Peptide Score: 51.15  
Method: FTMS; HCD; 1

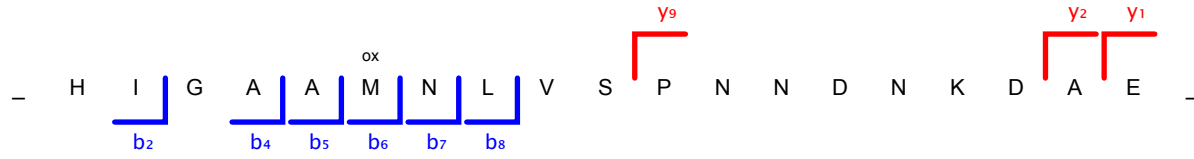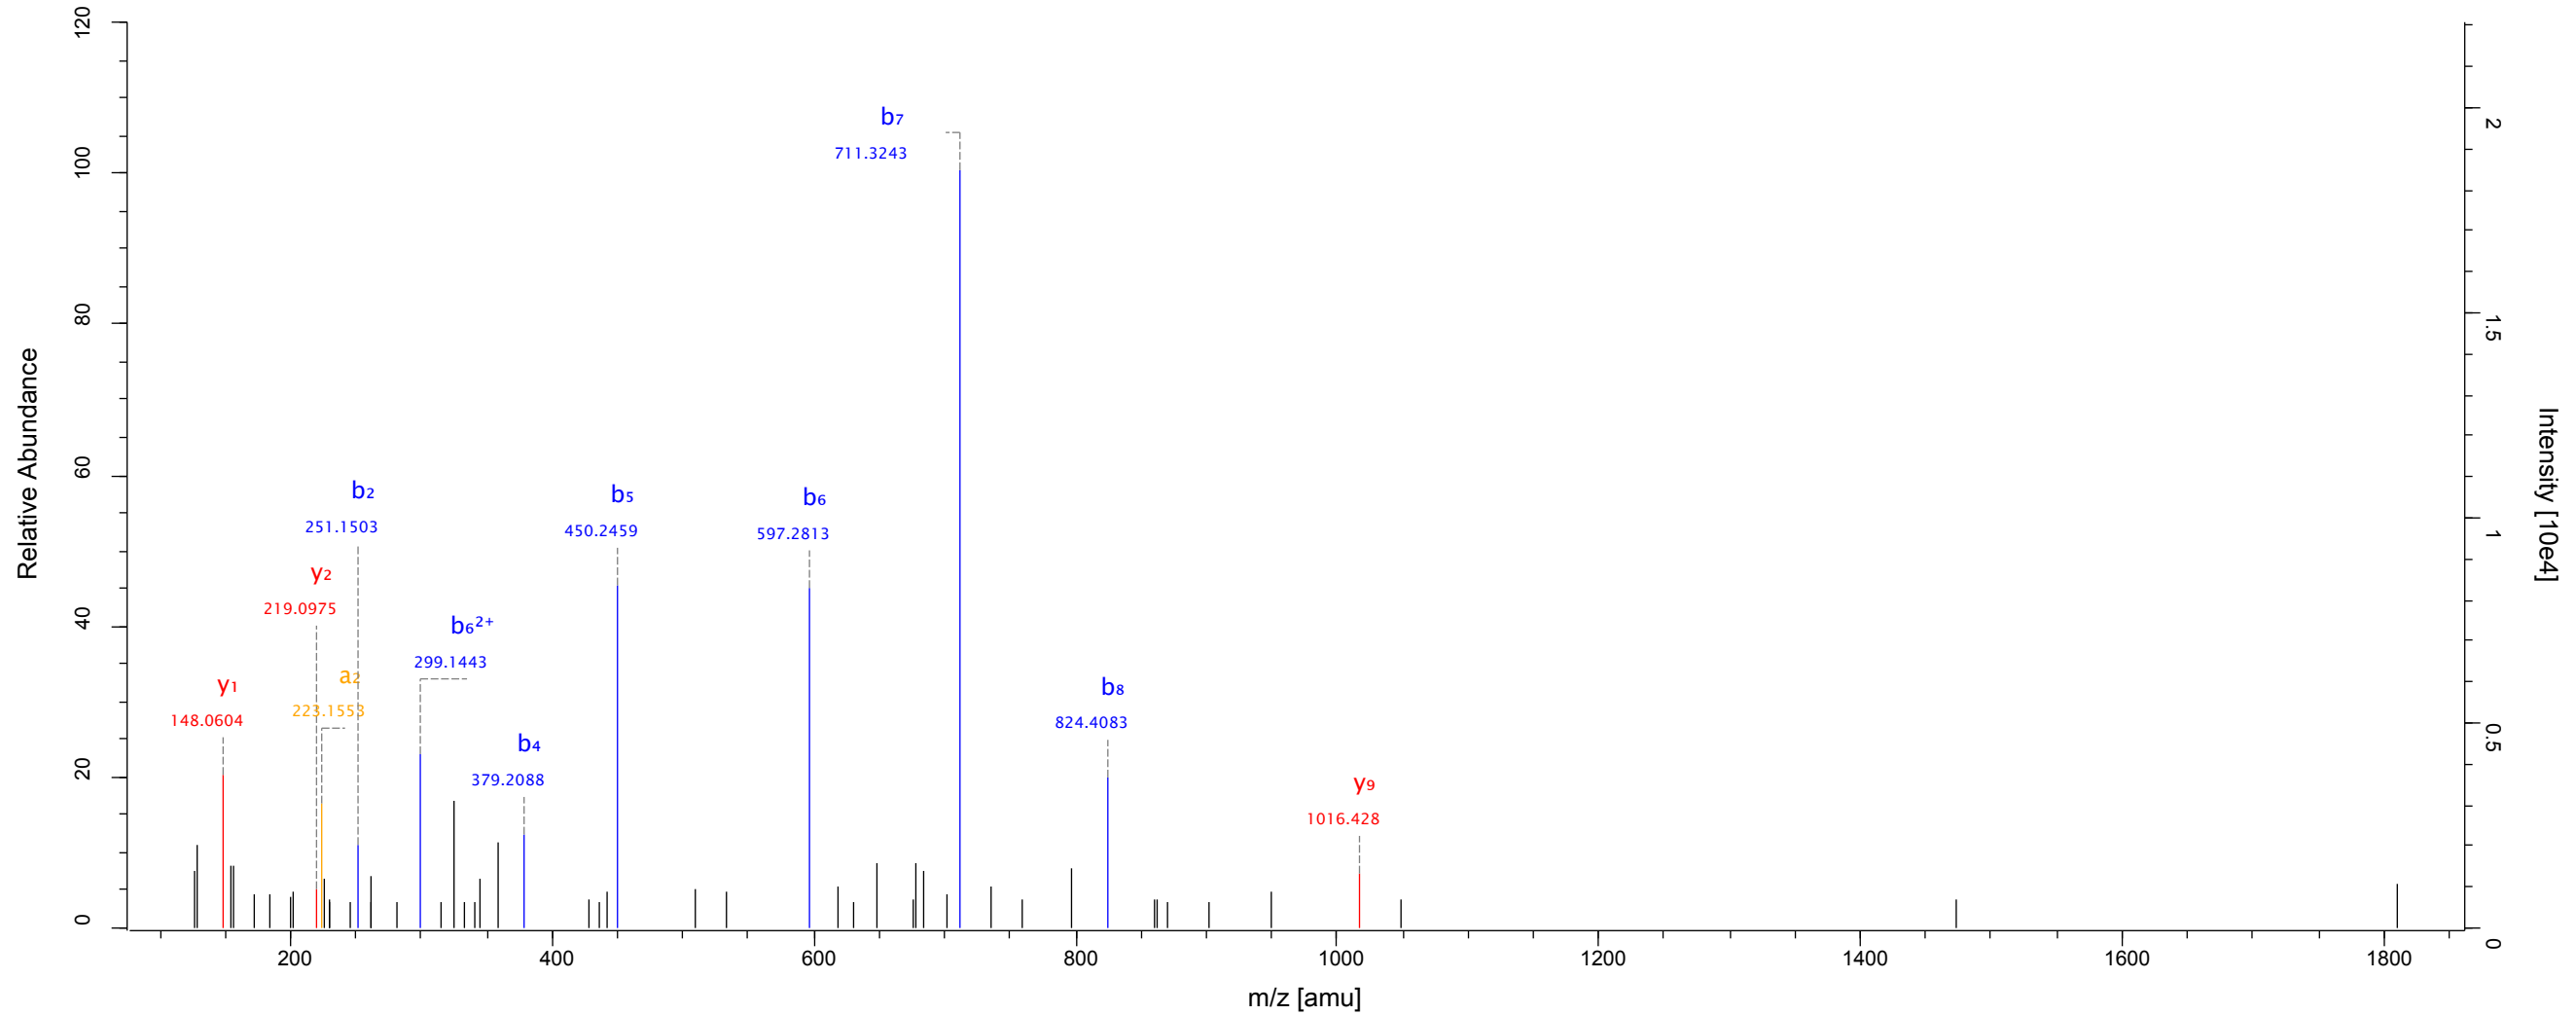

# peptide ID 129

Source: 20120816\_CO\_0340Gaje\_R02  
Scannumber: 16095  
Protein: pep\_secretome\_587  
Peptide Score: 79.77  
Method: FTMS; HCD; 1

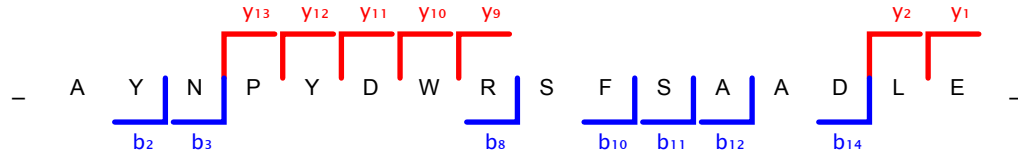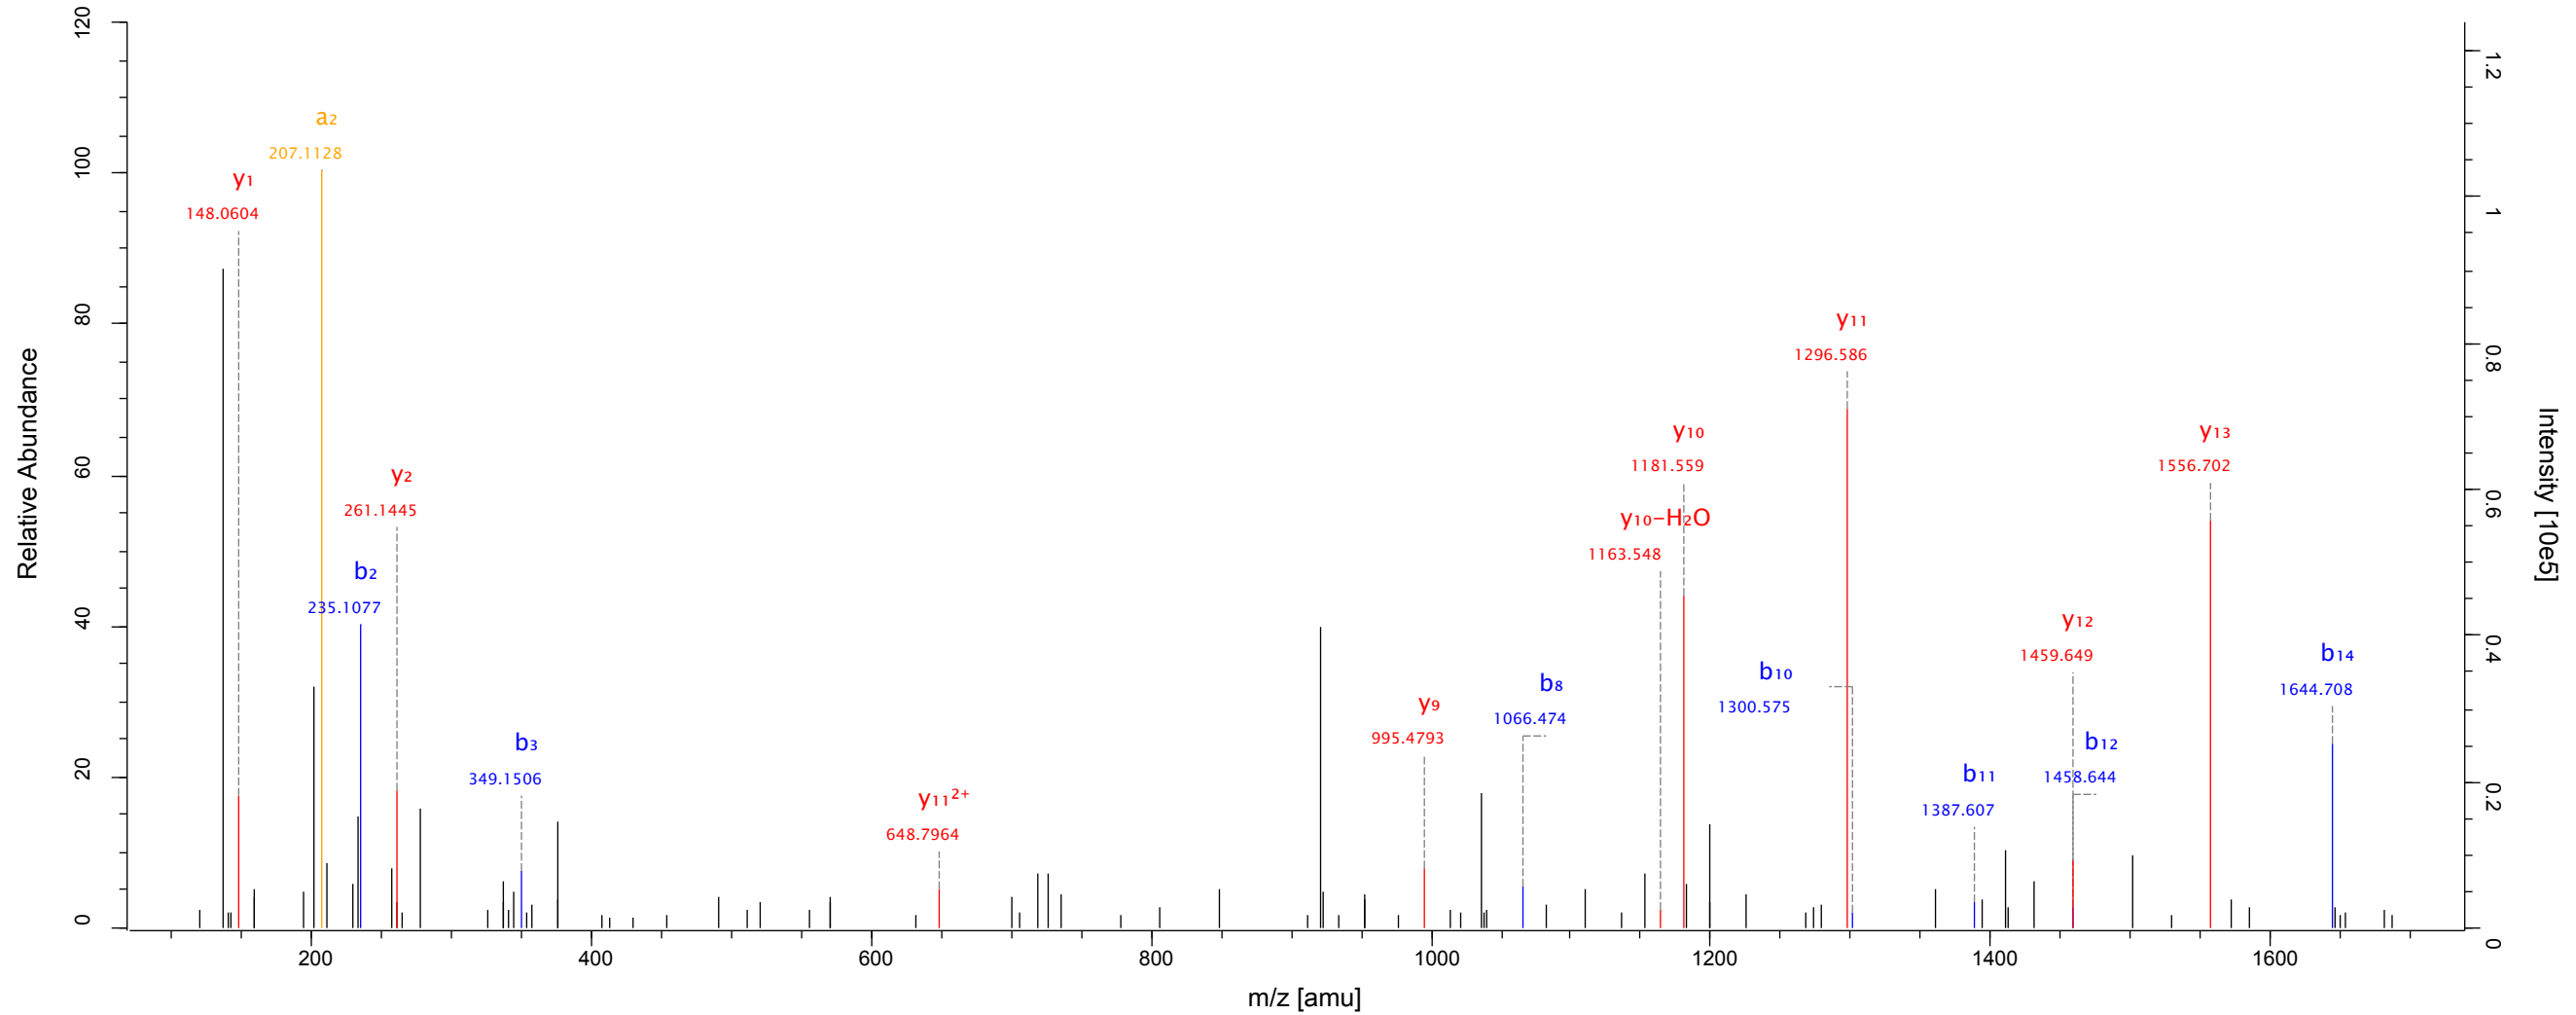

# peptide ID 130

Source: 20120816\_CO\_0340Gaje\_R02  
Scannumber: 15875  
Protein: pep\_secretome\_589  
Peptide Score: 65.47  
Method: FTMS; HCD; 1

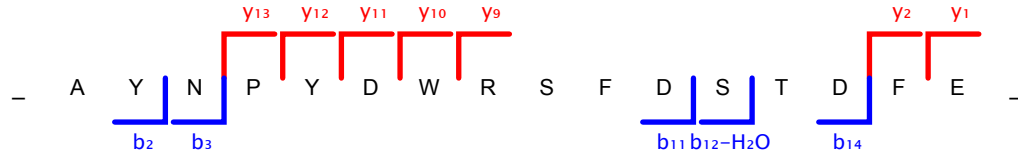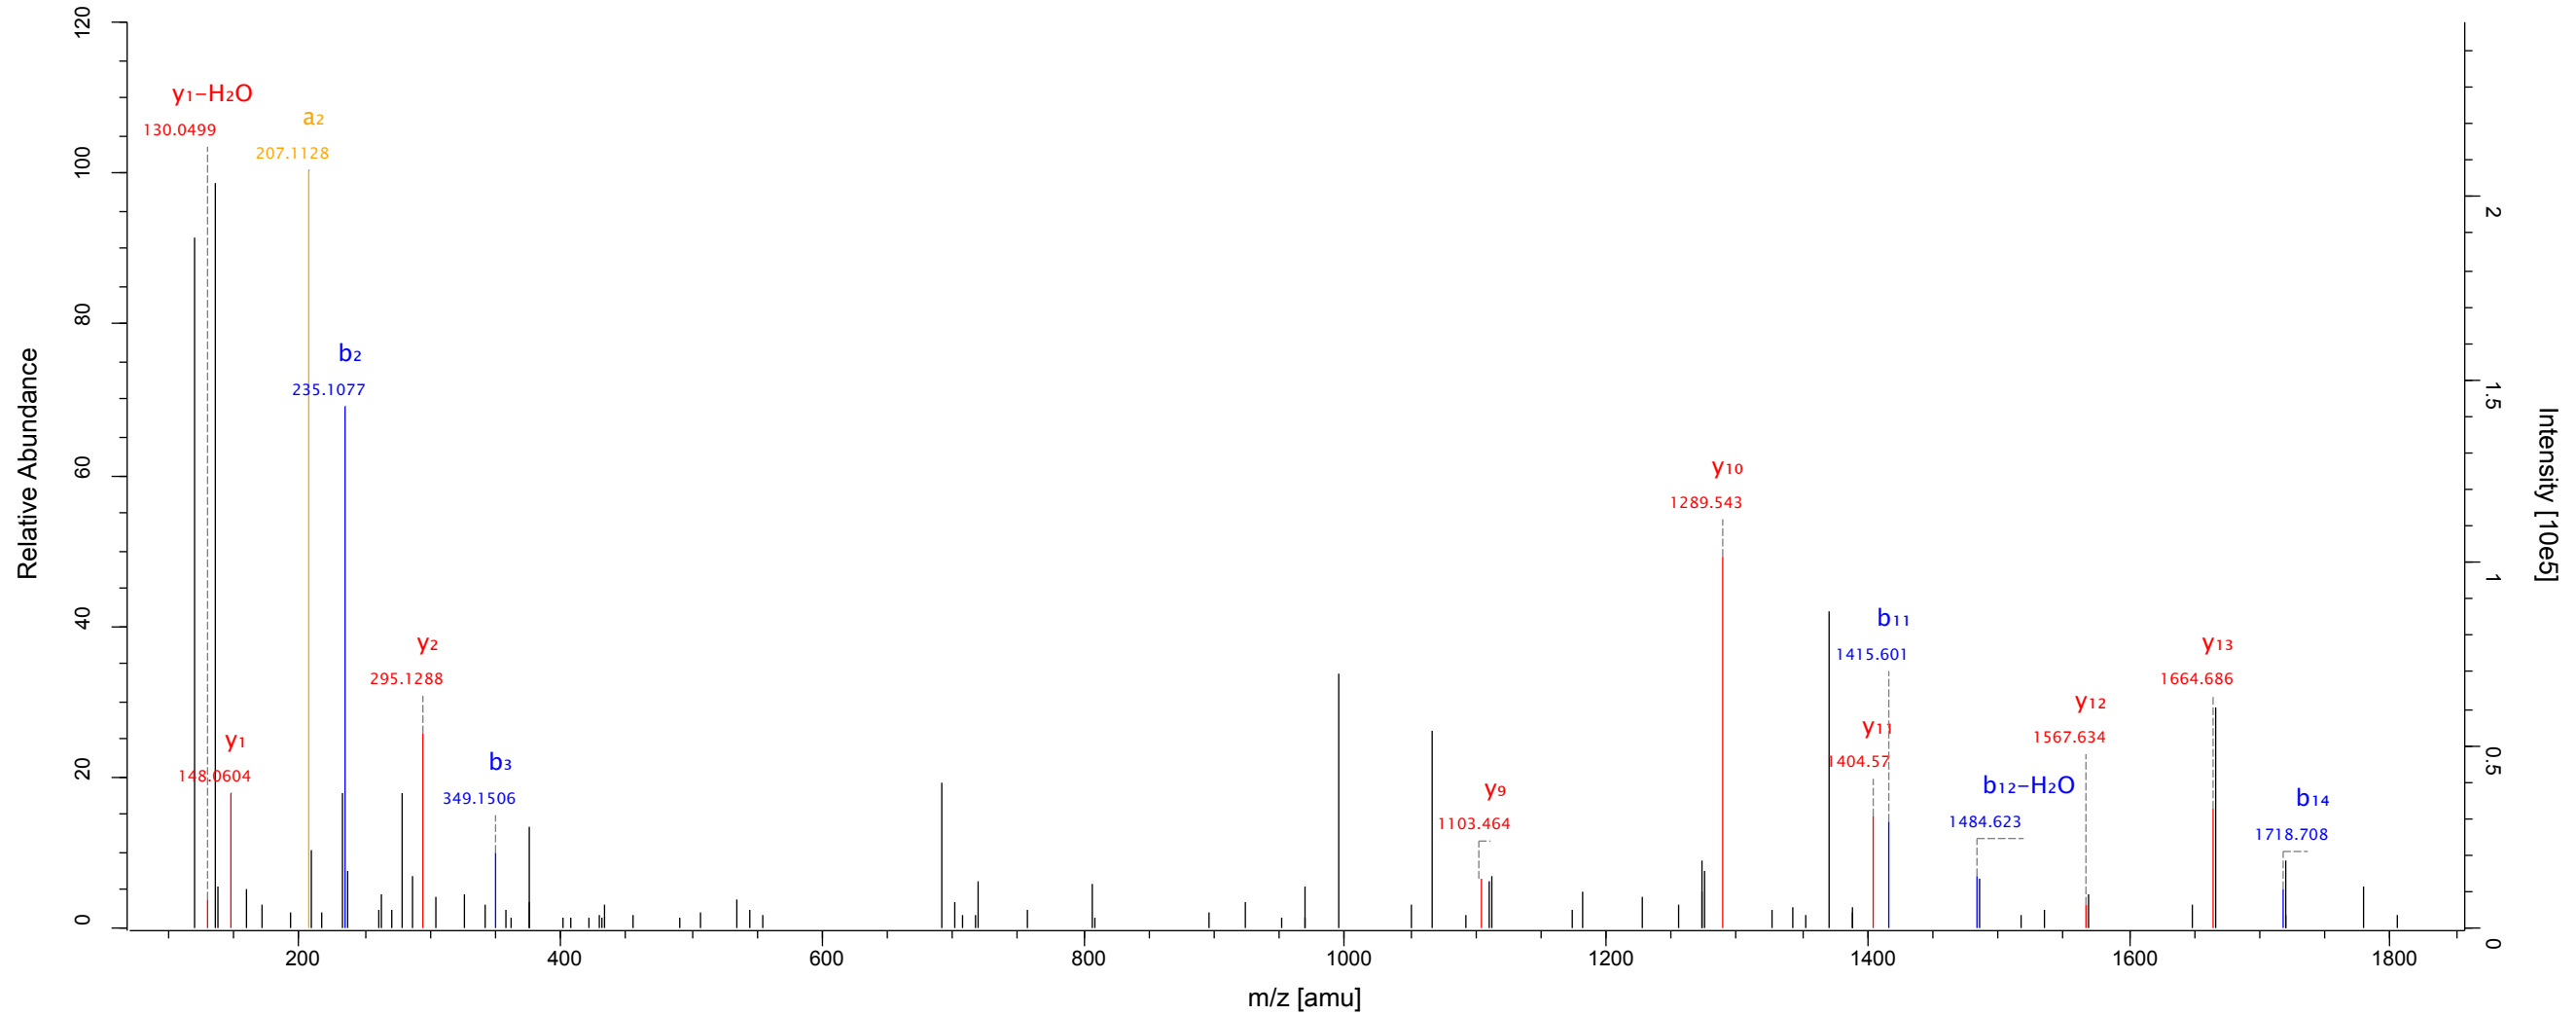

# peptide ID 131

Source: 20120816\_CO\_0340Gaje\_R02  
Scannumber: 12513  
Protein: pep\_secretome\_16655; pep\_secretome\_87516  
Peptide Score: 89.3  
Method: FTMS; HCD; 1

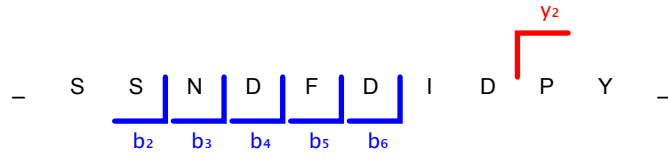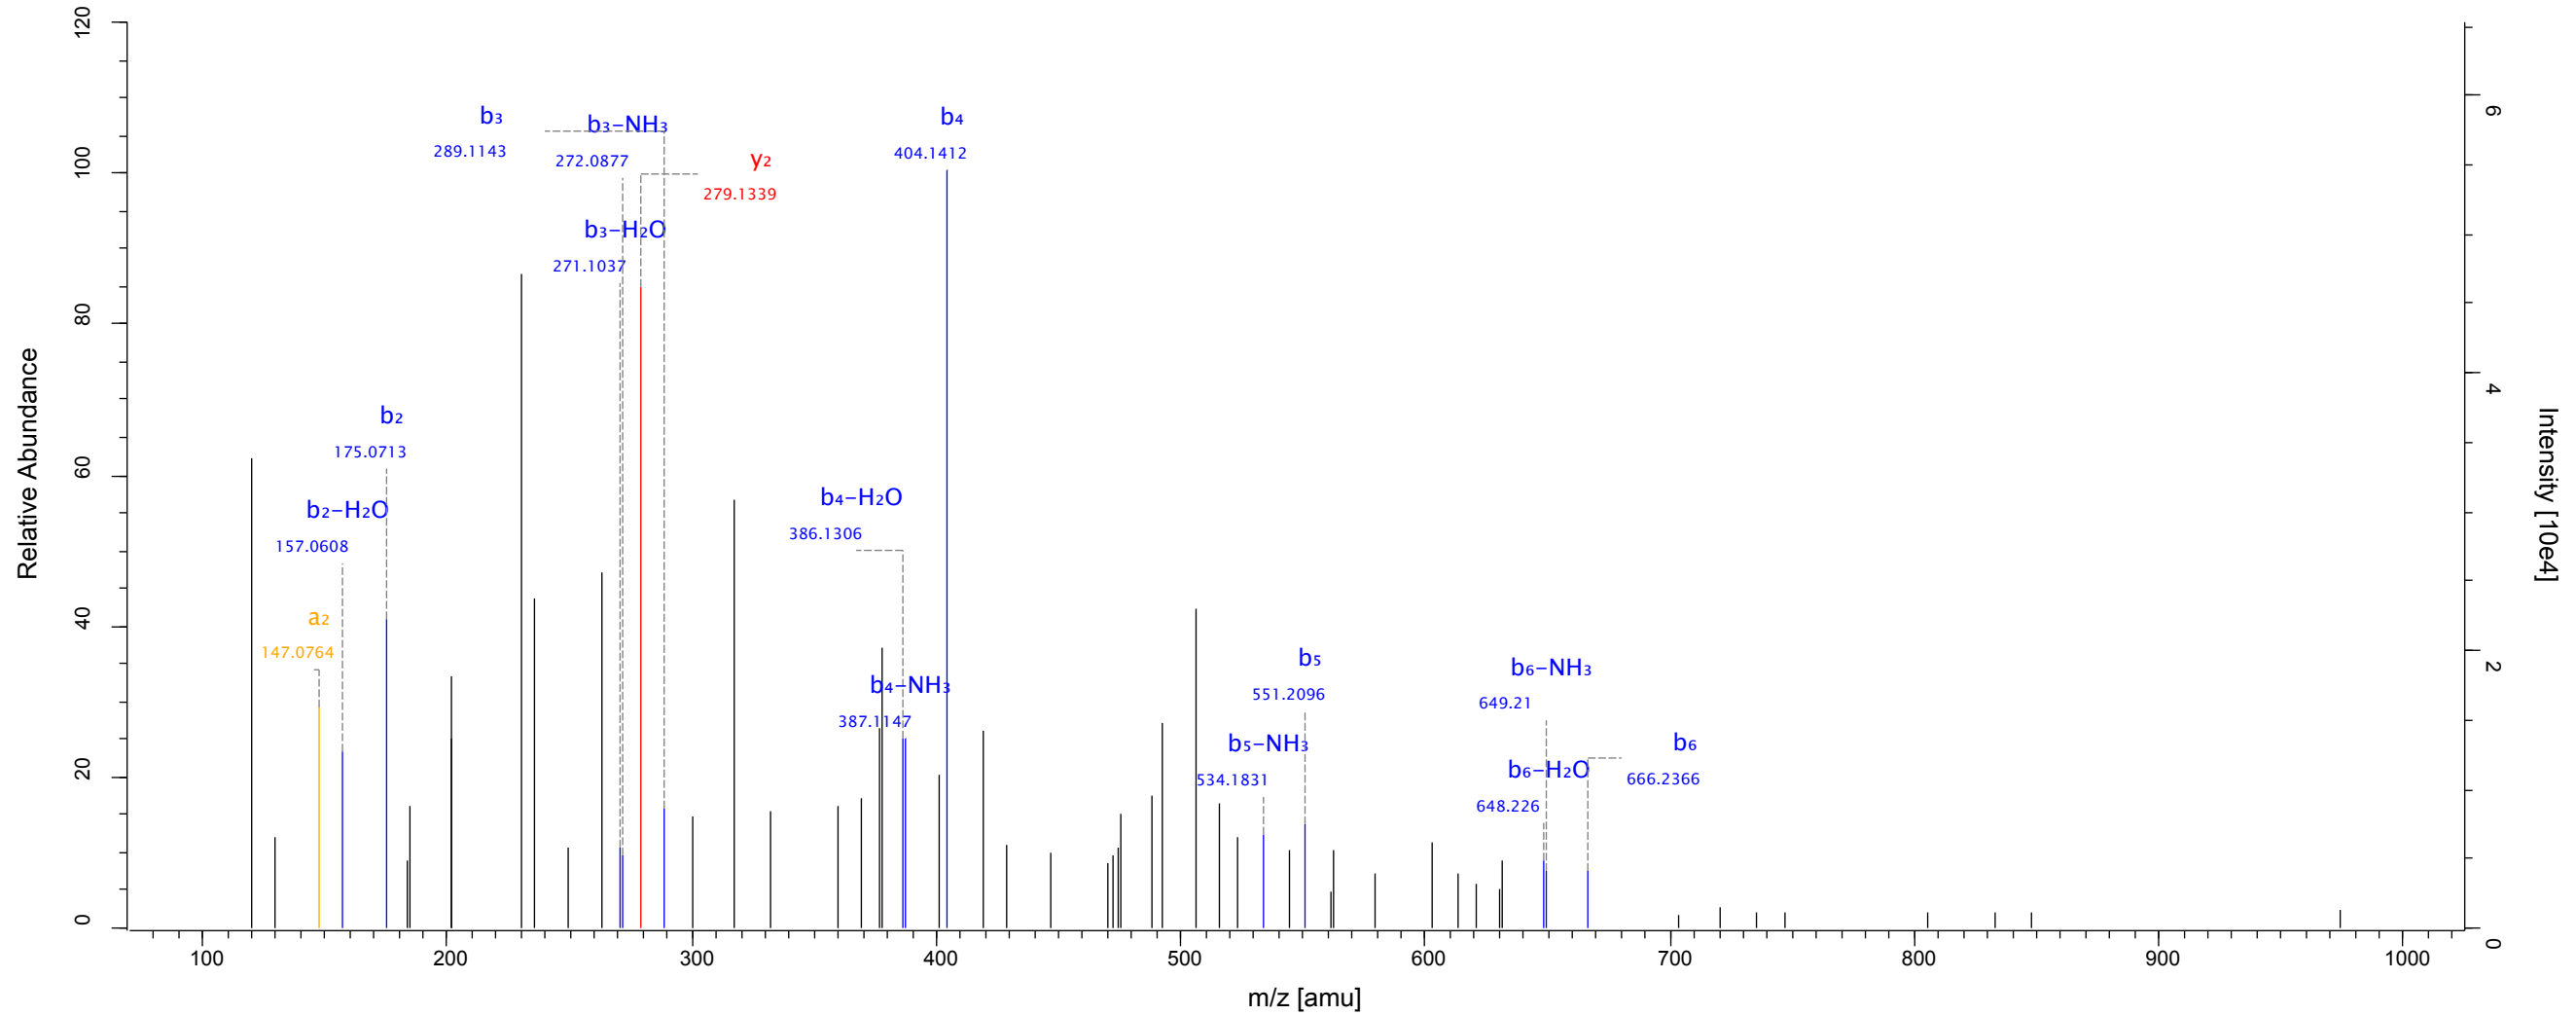

# peptide ID 132

Source: 20120816\_CO\_0340Gaje\_R02  
Scannumber: 9705  
Protein: pep\_secretome\_16657; pep\_secretome\_16659; pep\_secretome\_87519; pep\_secretome\_87521  
Peptide Score: 57.52  
Method: FTMS; HCD; 1

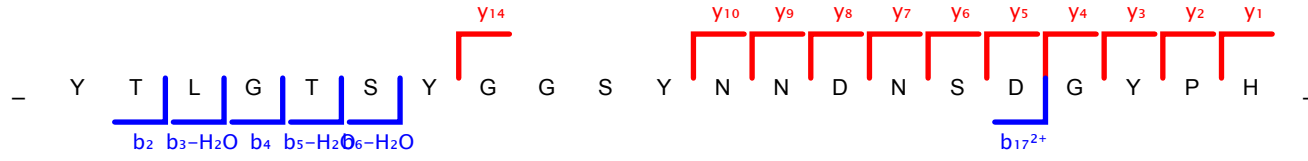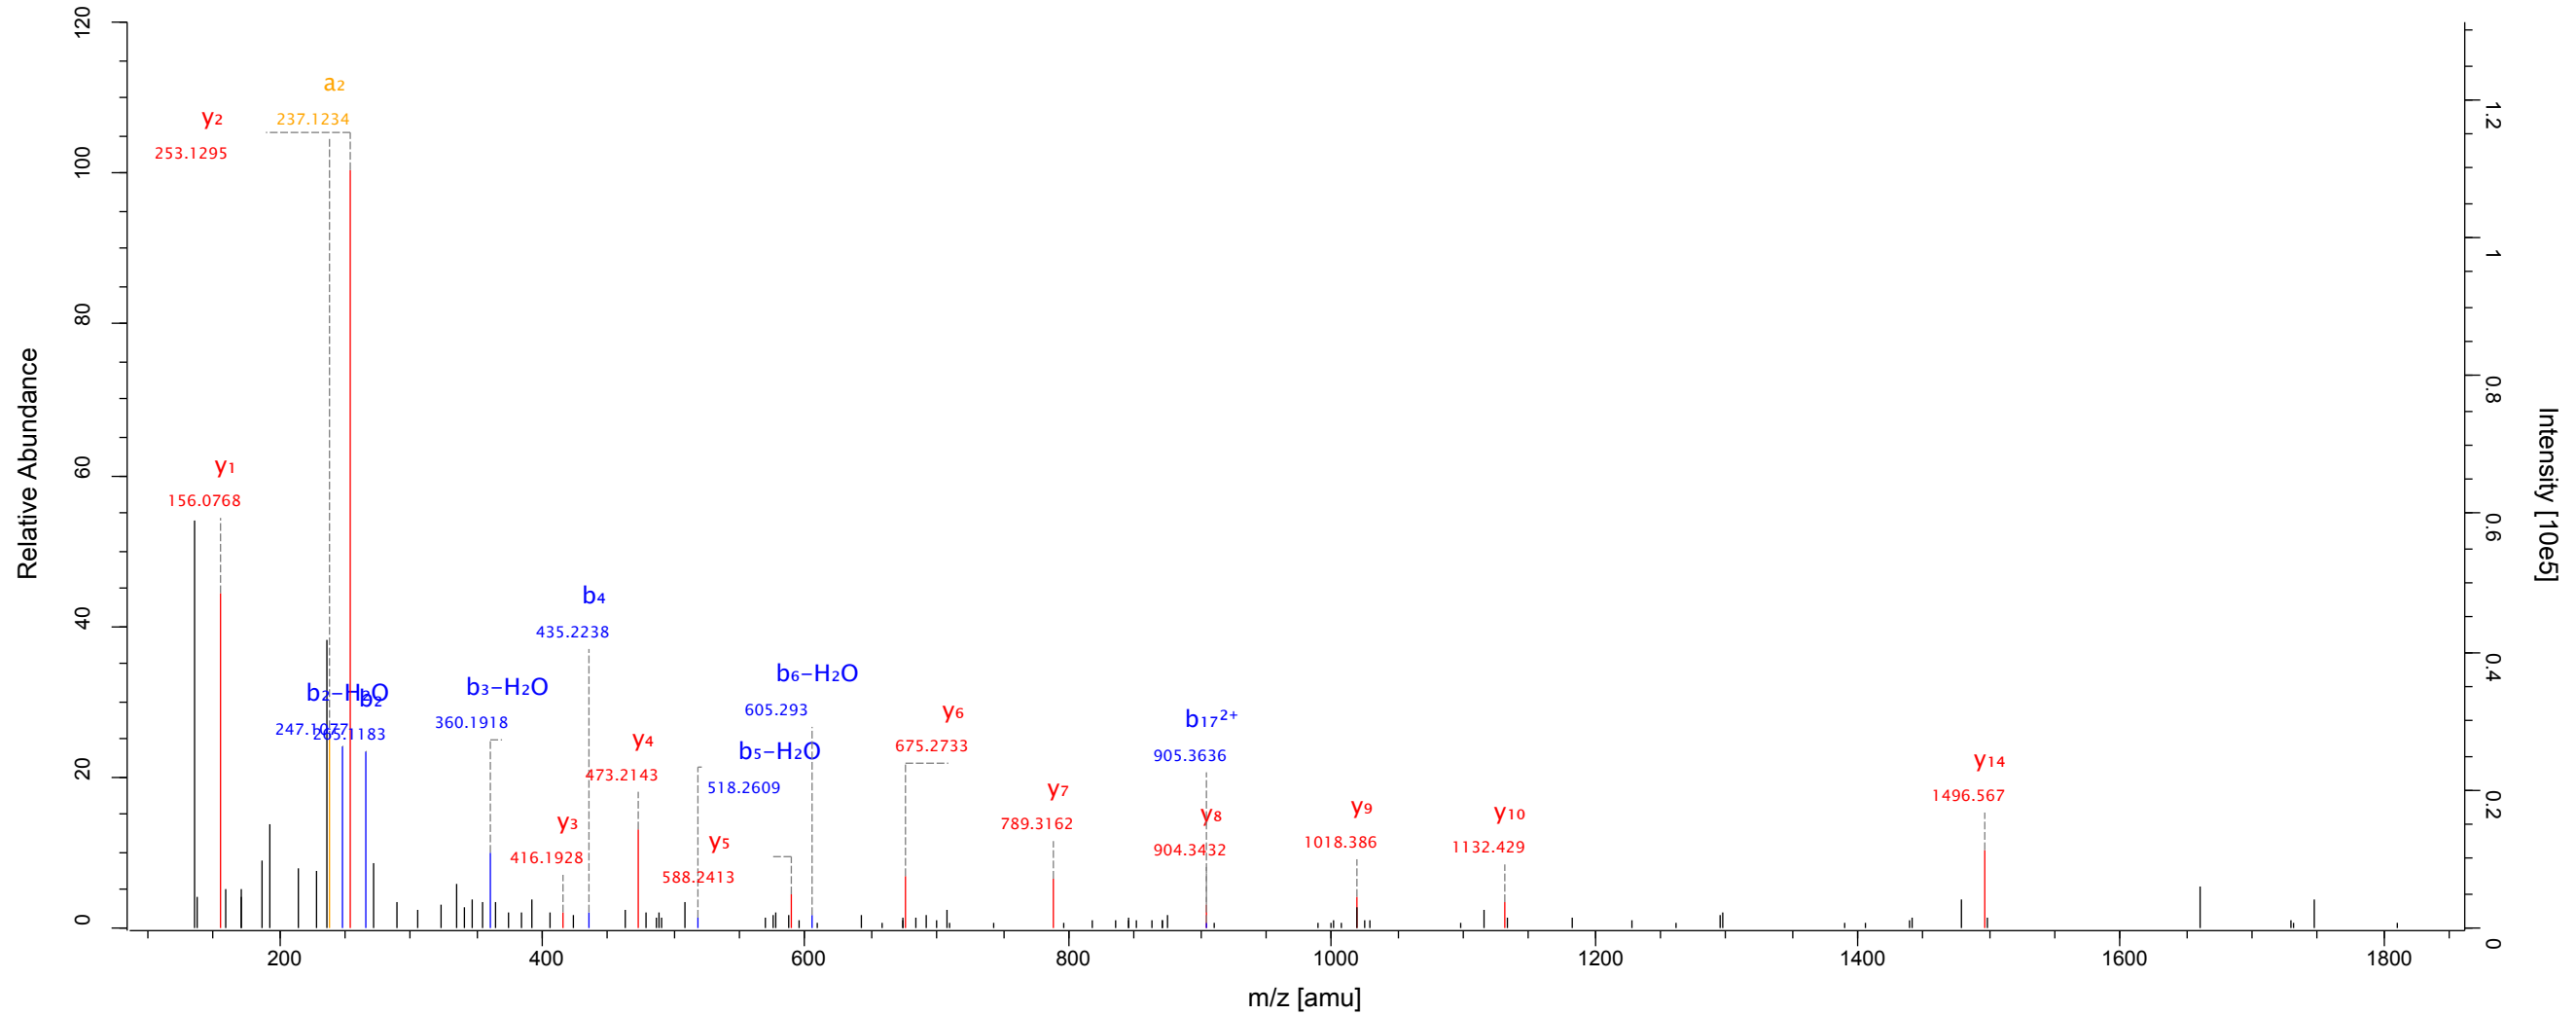



# peptide ID 133

Source: 20121106\_CO\_0340Gaje\_R02\_2  
Scannumber: 10810  
Protein: pep\_secretome\_2788  
Peptide Score: 83.31  
Method: FTMS; HCD; 1

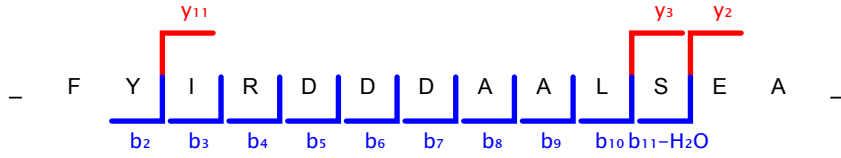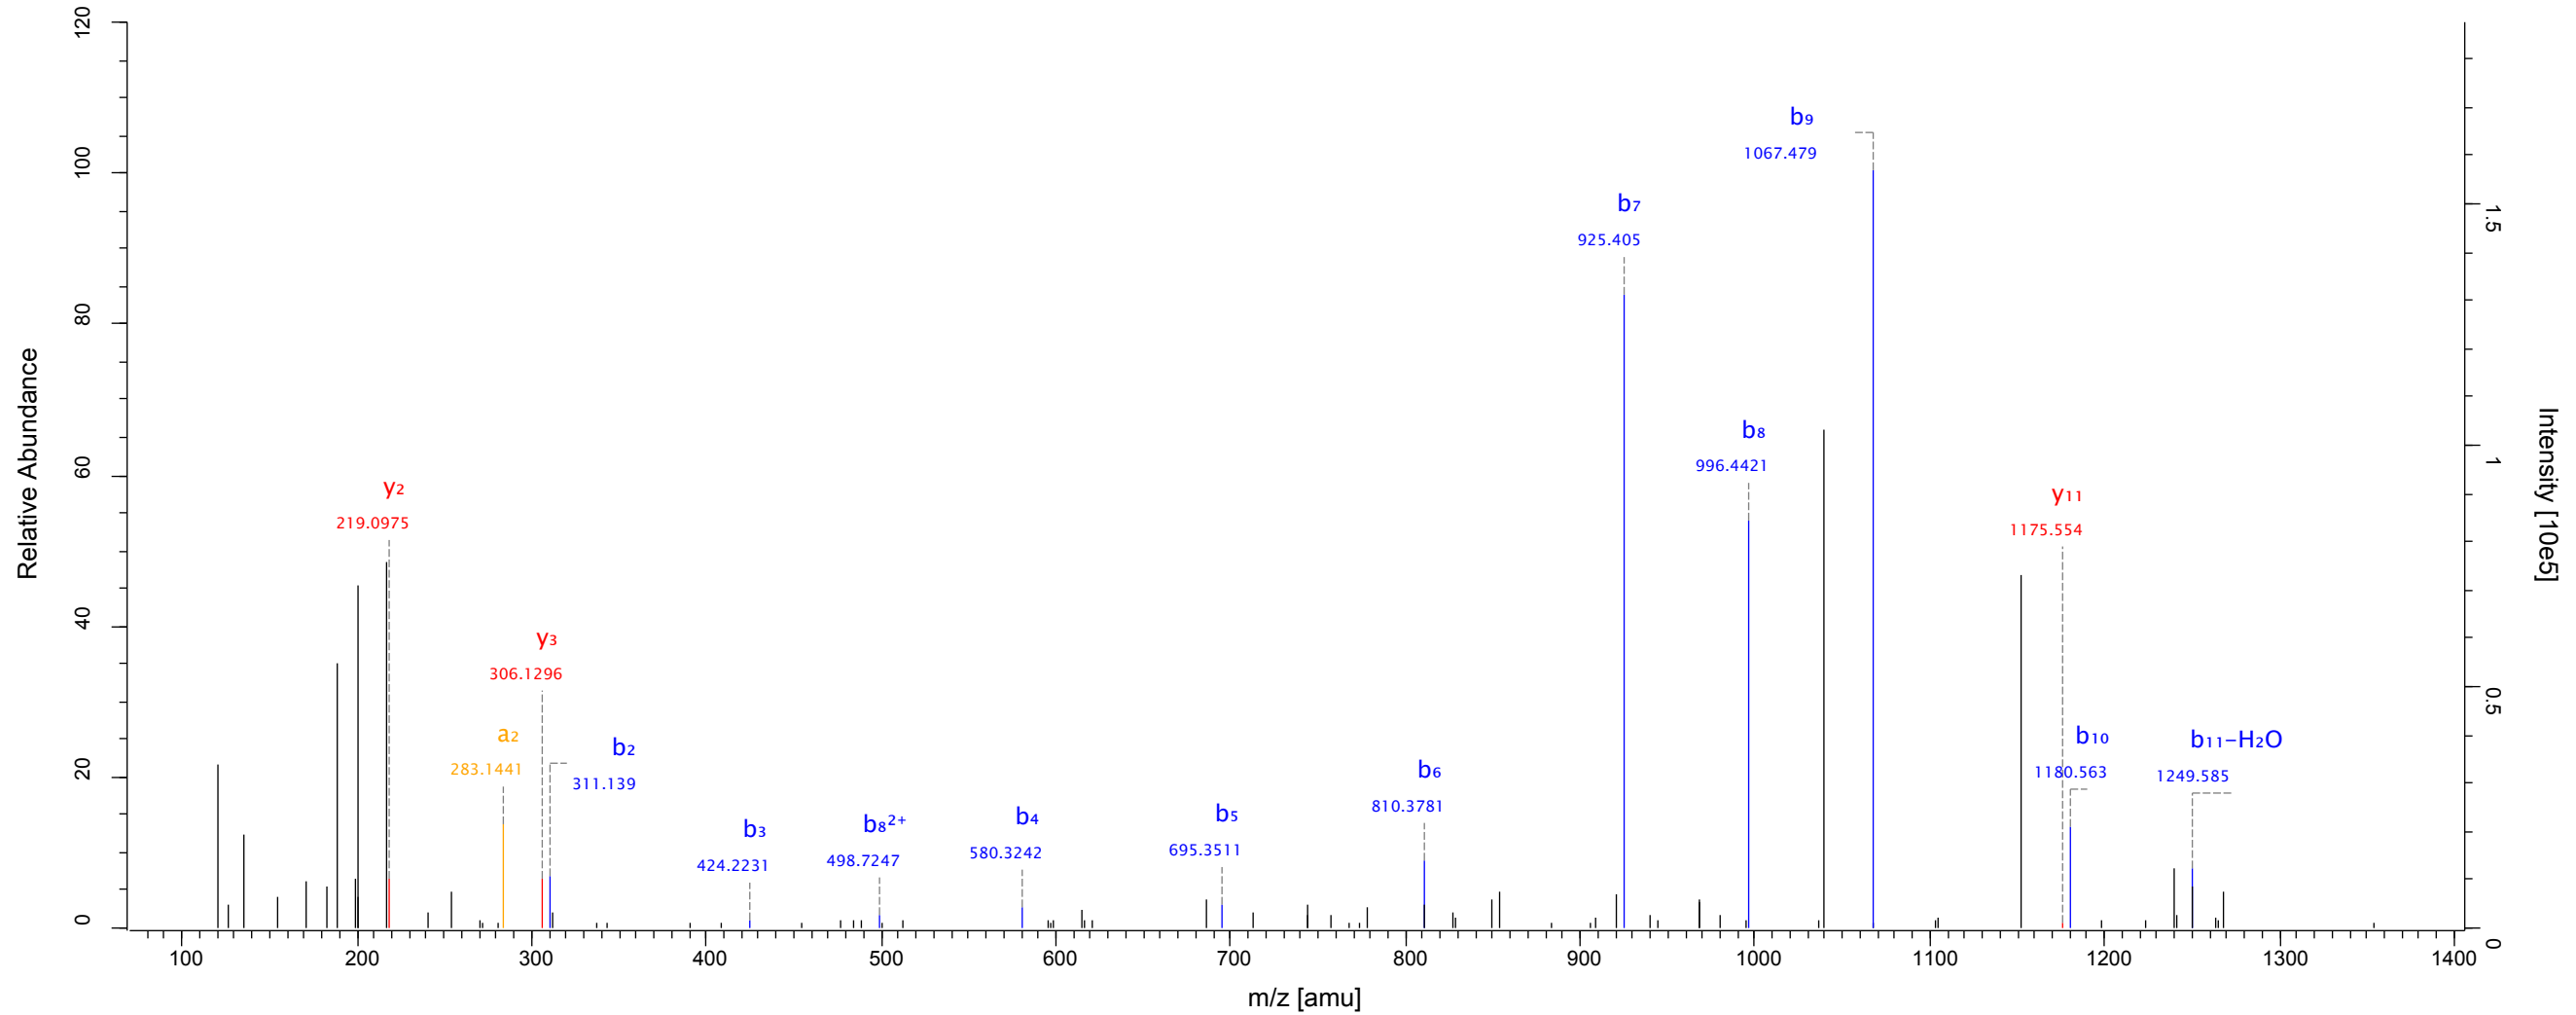

# peptide ID 134

Source: 20121106\_CO\_0340Gaje\_R02\_2  
Scannumber: 16846  
Protein: pep\_secretome\_2789  
Peptide Score: 135.23  
Method: FTMS; HCD; 1

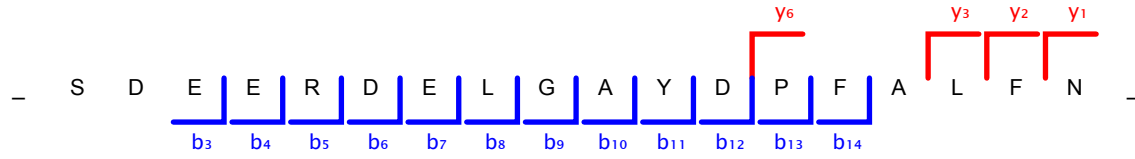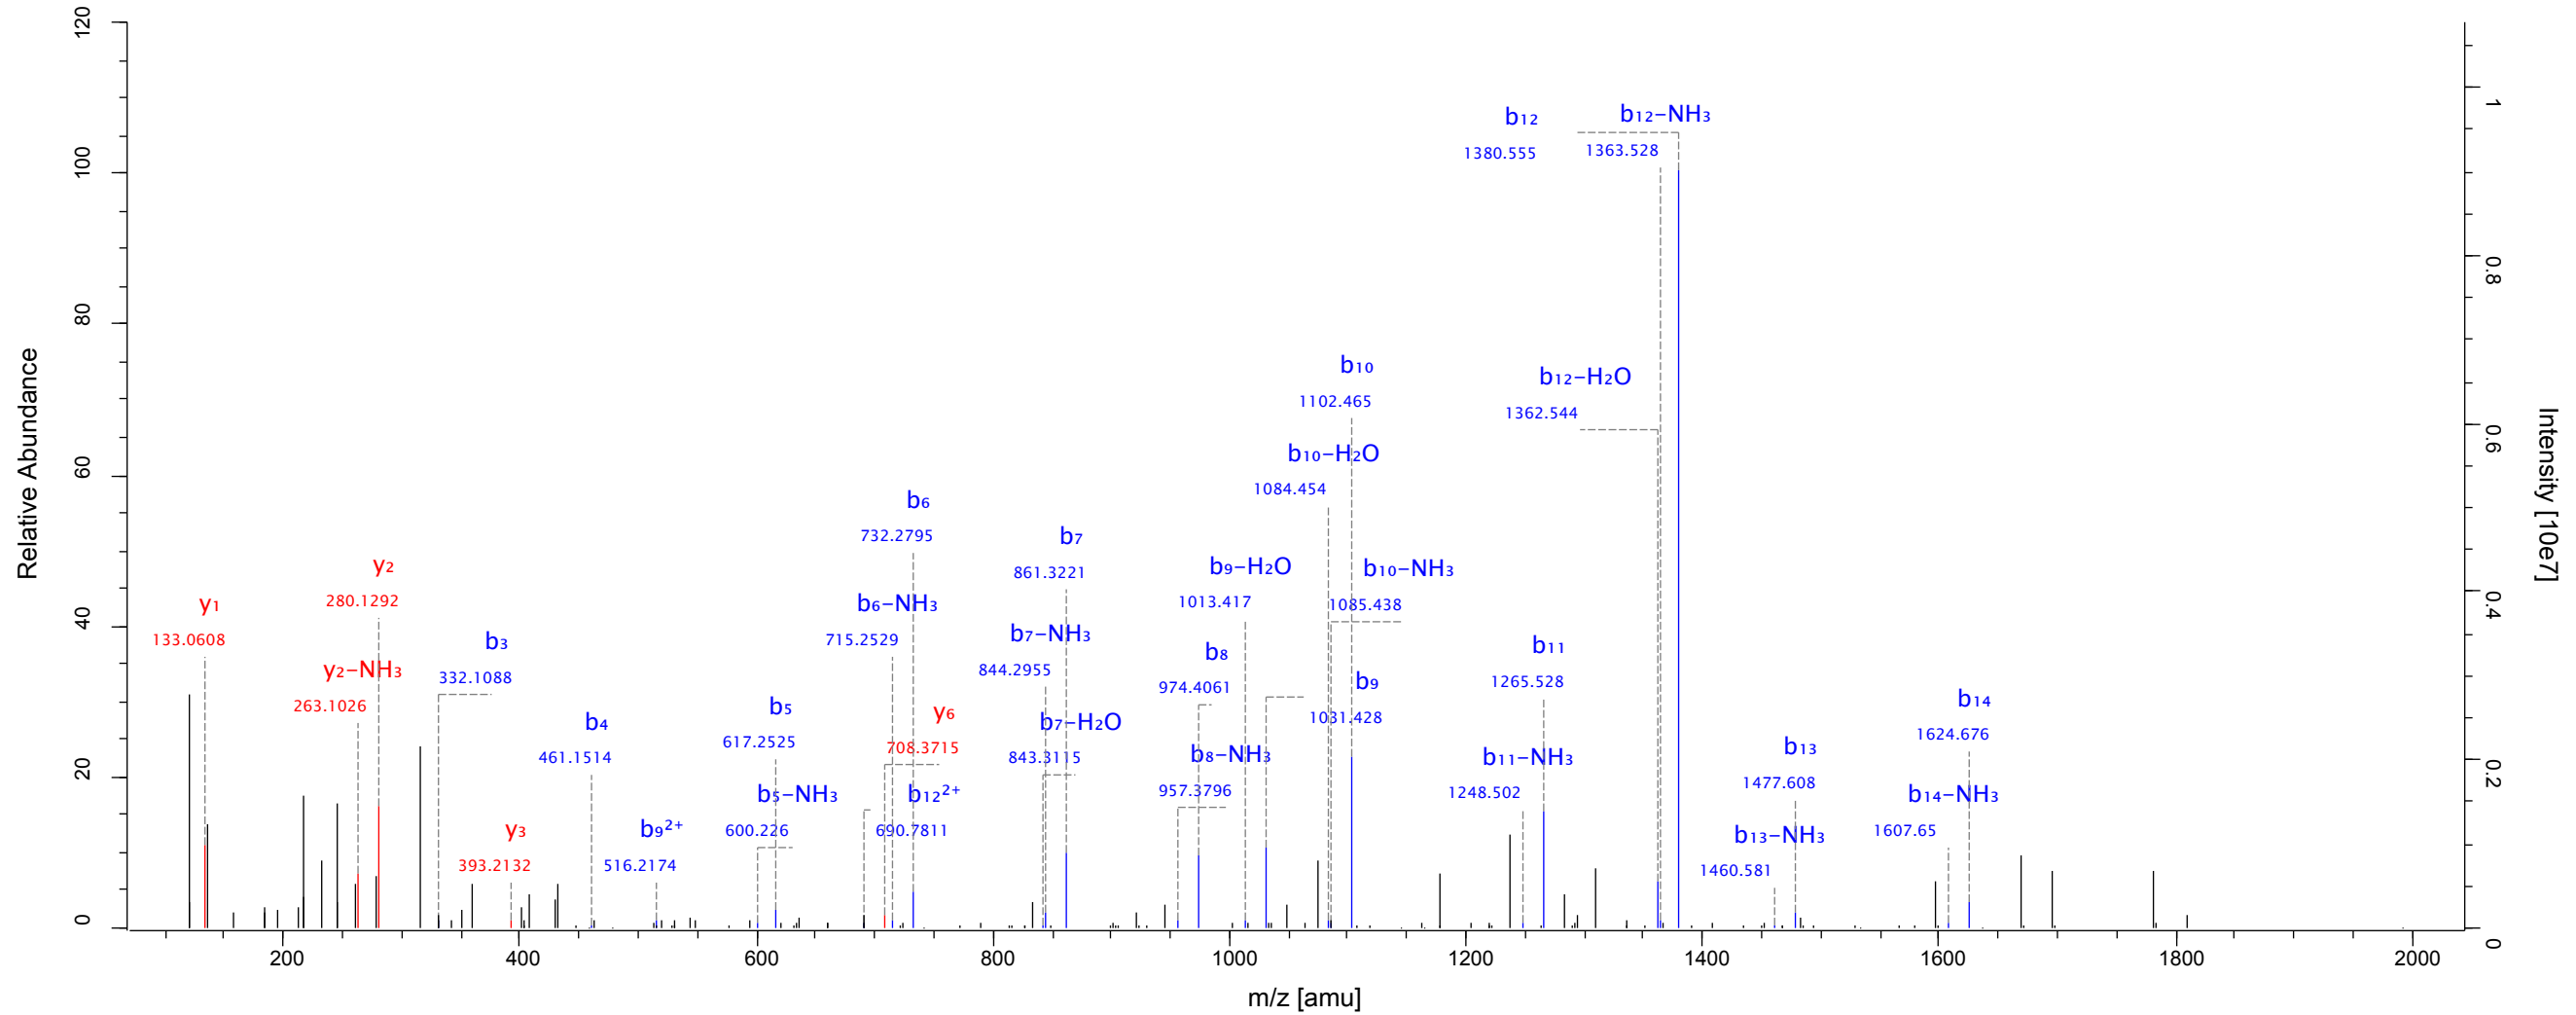

# peptide ID 135

Source: 20121106\_CO\_0340Gaje\_R02\_2  
Scannumber: 17118  
Protein: pep\_secretome\_2792; pep\_secretome\_34564  
Peptide Score: 44.5  
Method: FTMS; HCD; 1

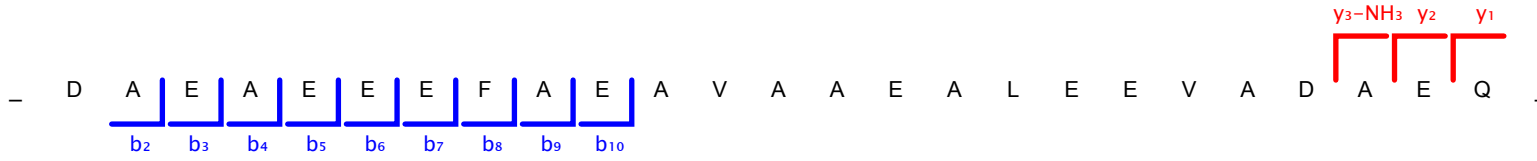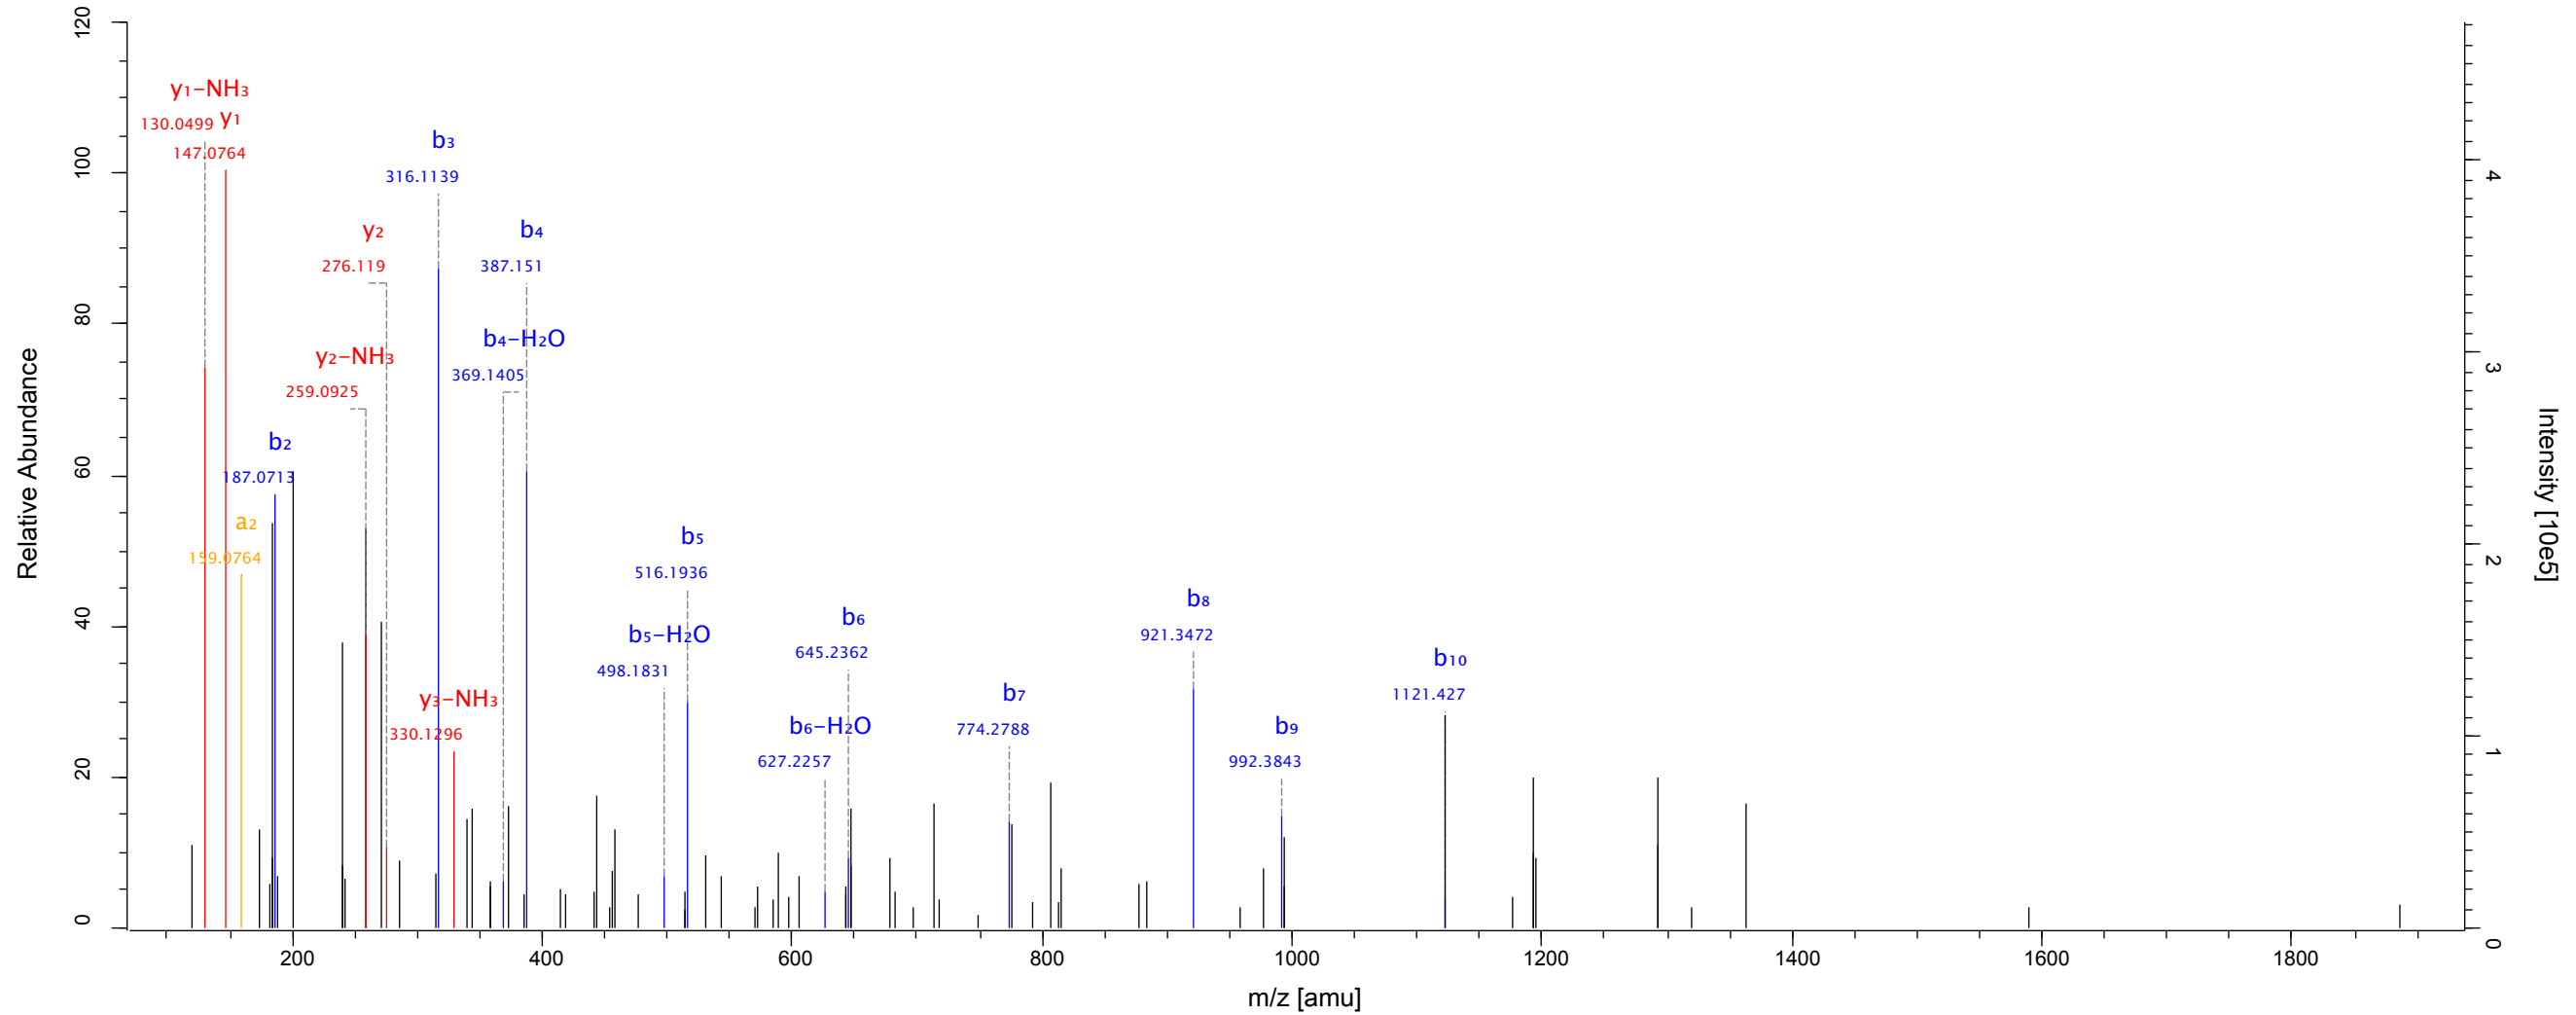

# peptide ID 136

Source: 20120816\_CO\_0340Gaje\_R02  
Scannumber: 17009  
Protein: pep\_secretome\_2803; pep\_secretome\_34576  
Peptide Score: 63.18  
Method: FTMS; HCD; 1

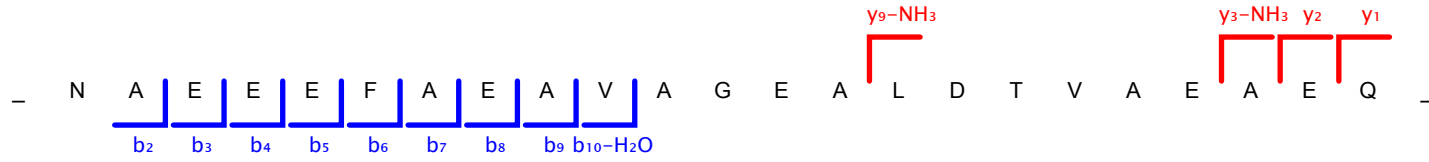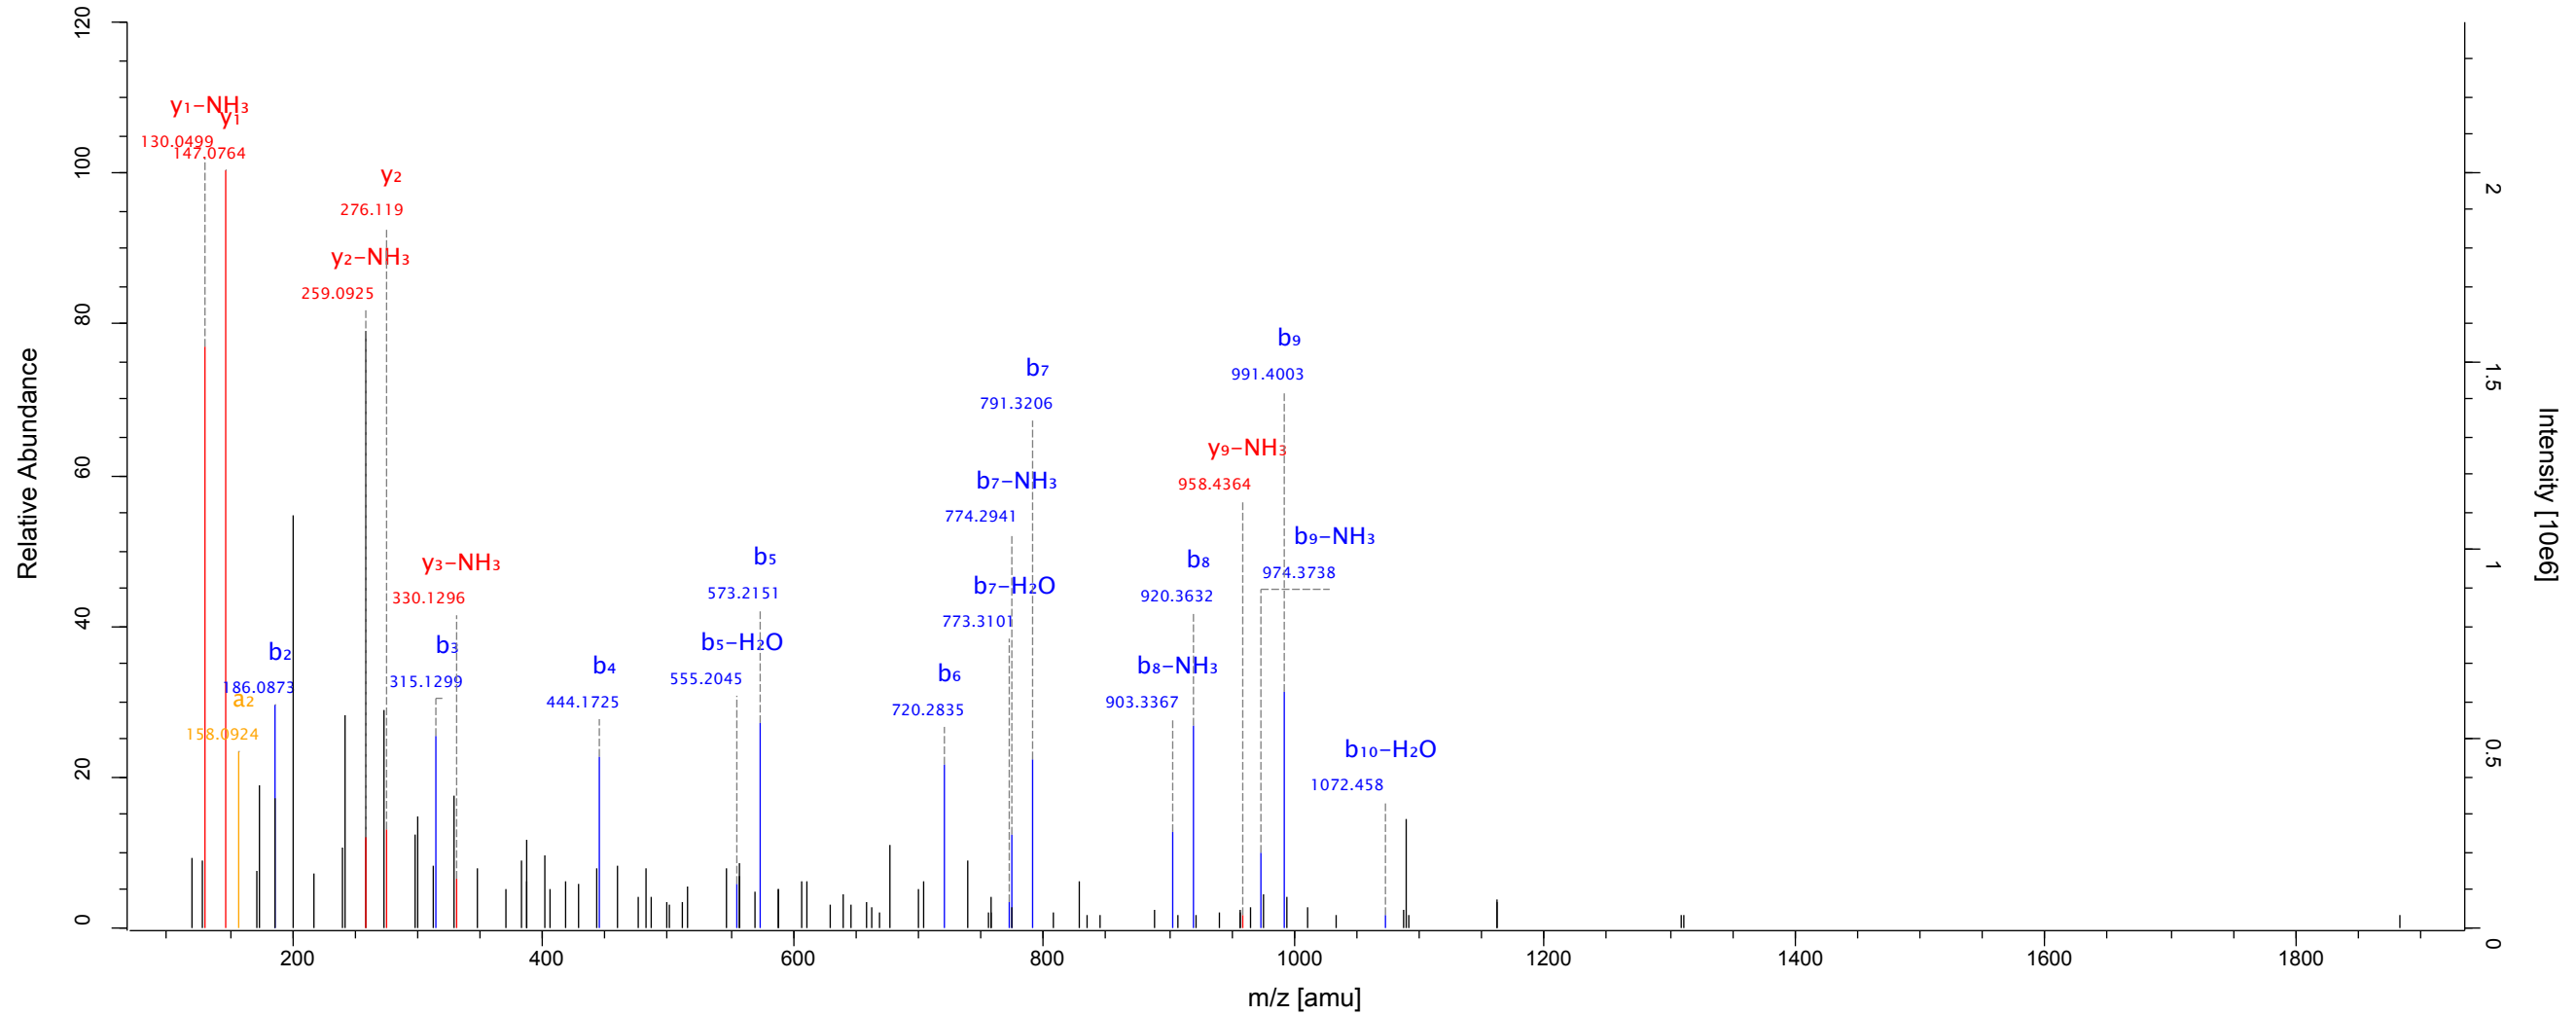

# peptide ID 137

Source: 20120816\_CO\_0340Gaje\_R02  
Scannumber: 10070  
Protein: pep\_secretome\_2806  
Peptide Score: 38.61  
Method: FTMS; HCD; 1

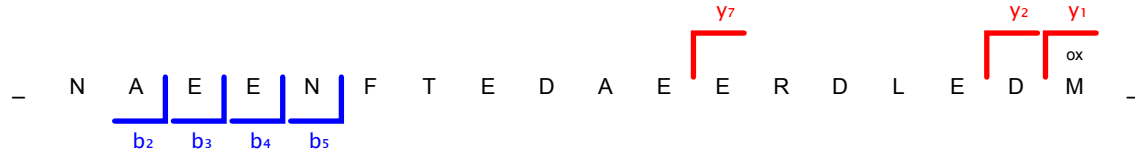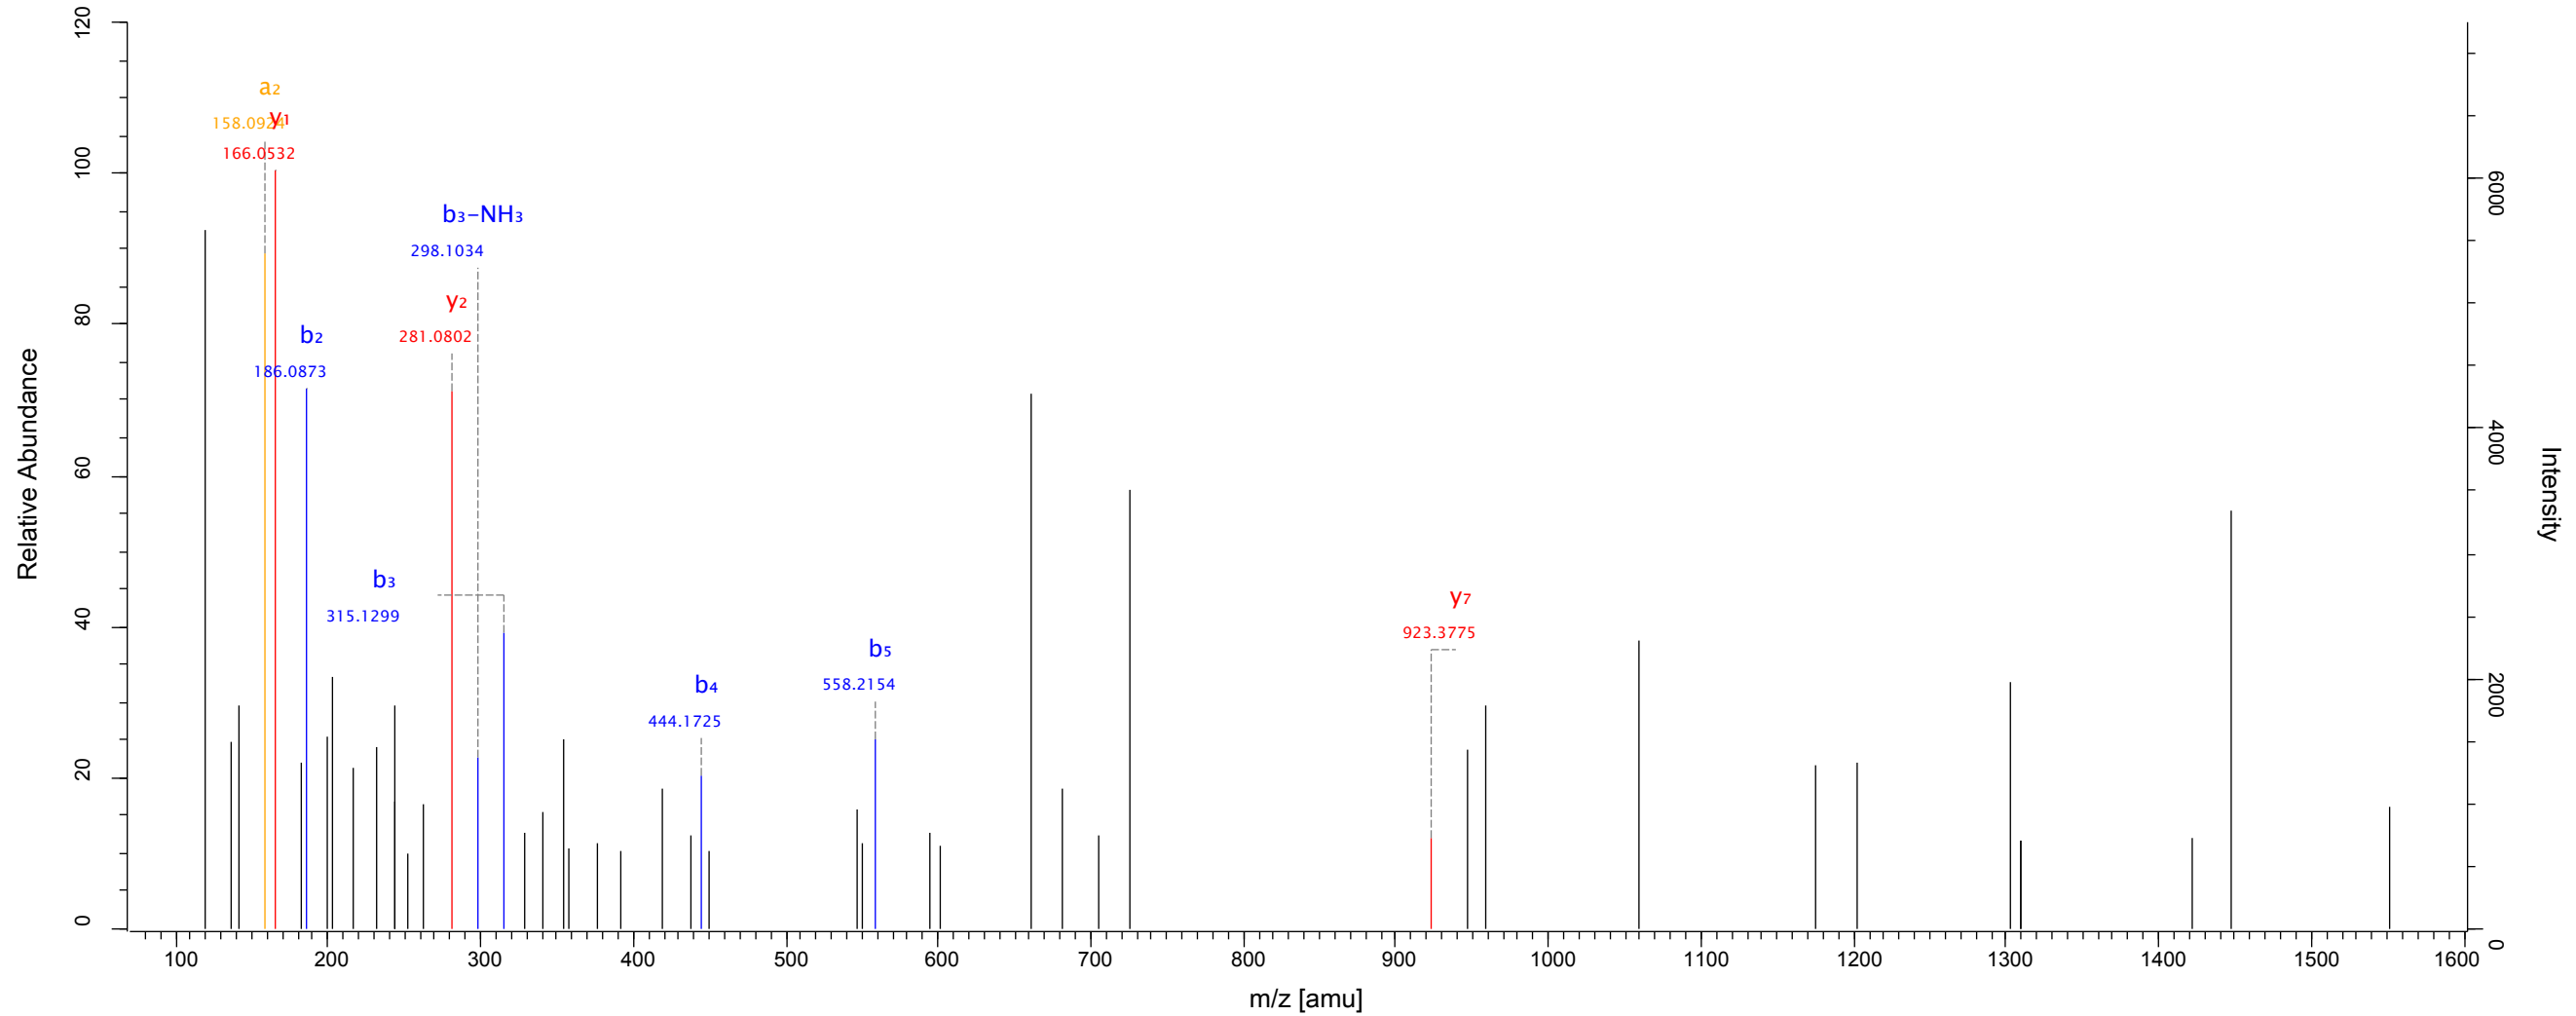

# peptide ID 138

Source: 20120816\_CO\_0340Gaje\_R02  
Scannumber: 16545  
Protein: pep\_secretome\_8011; SinglePep89  
Peptide Score: 70.28  
Method: FTMS; HCD; 1

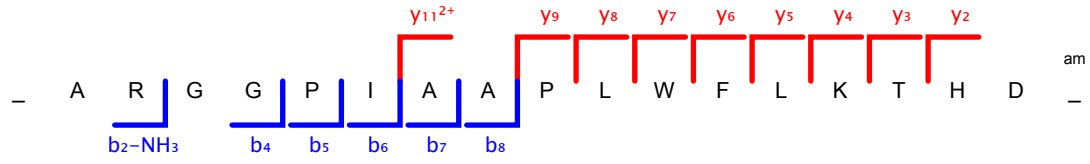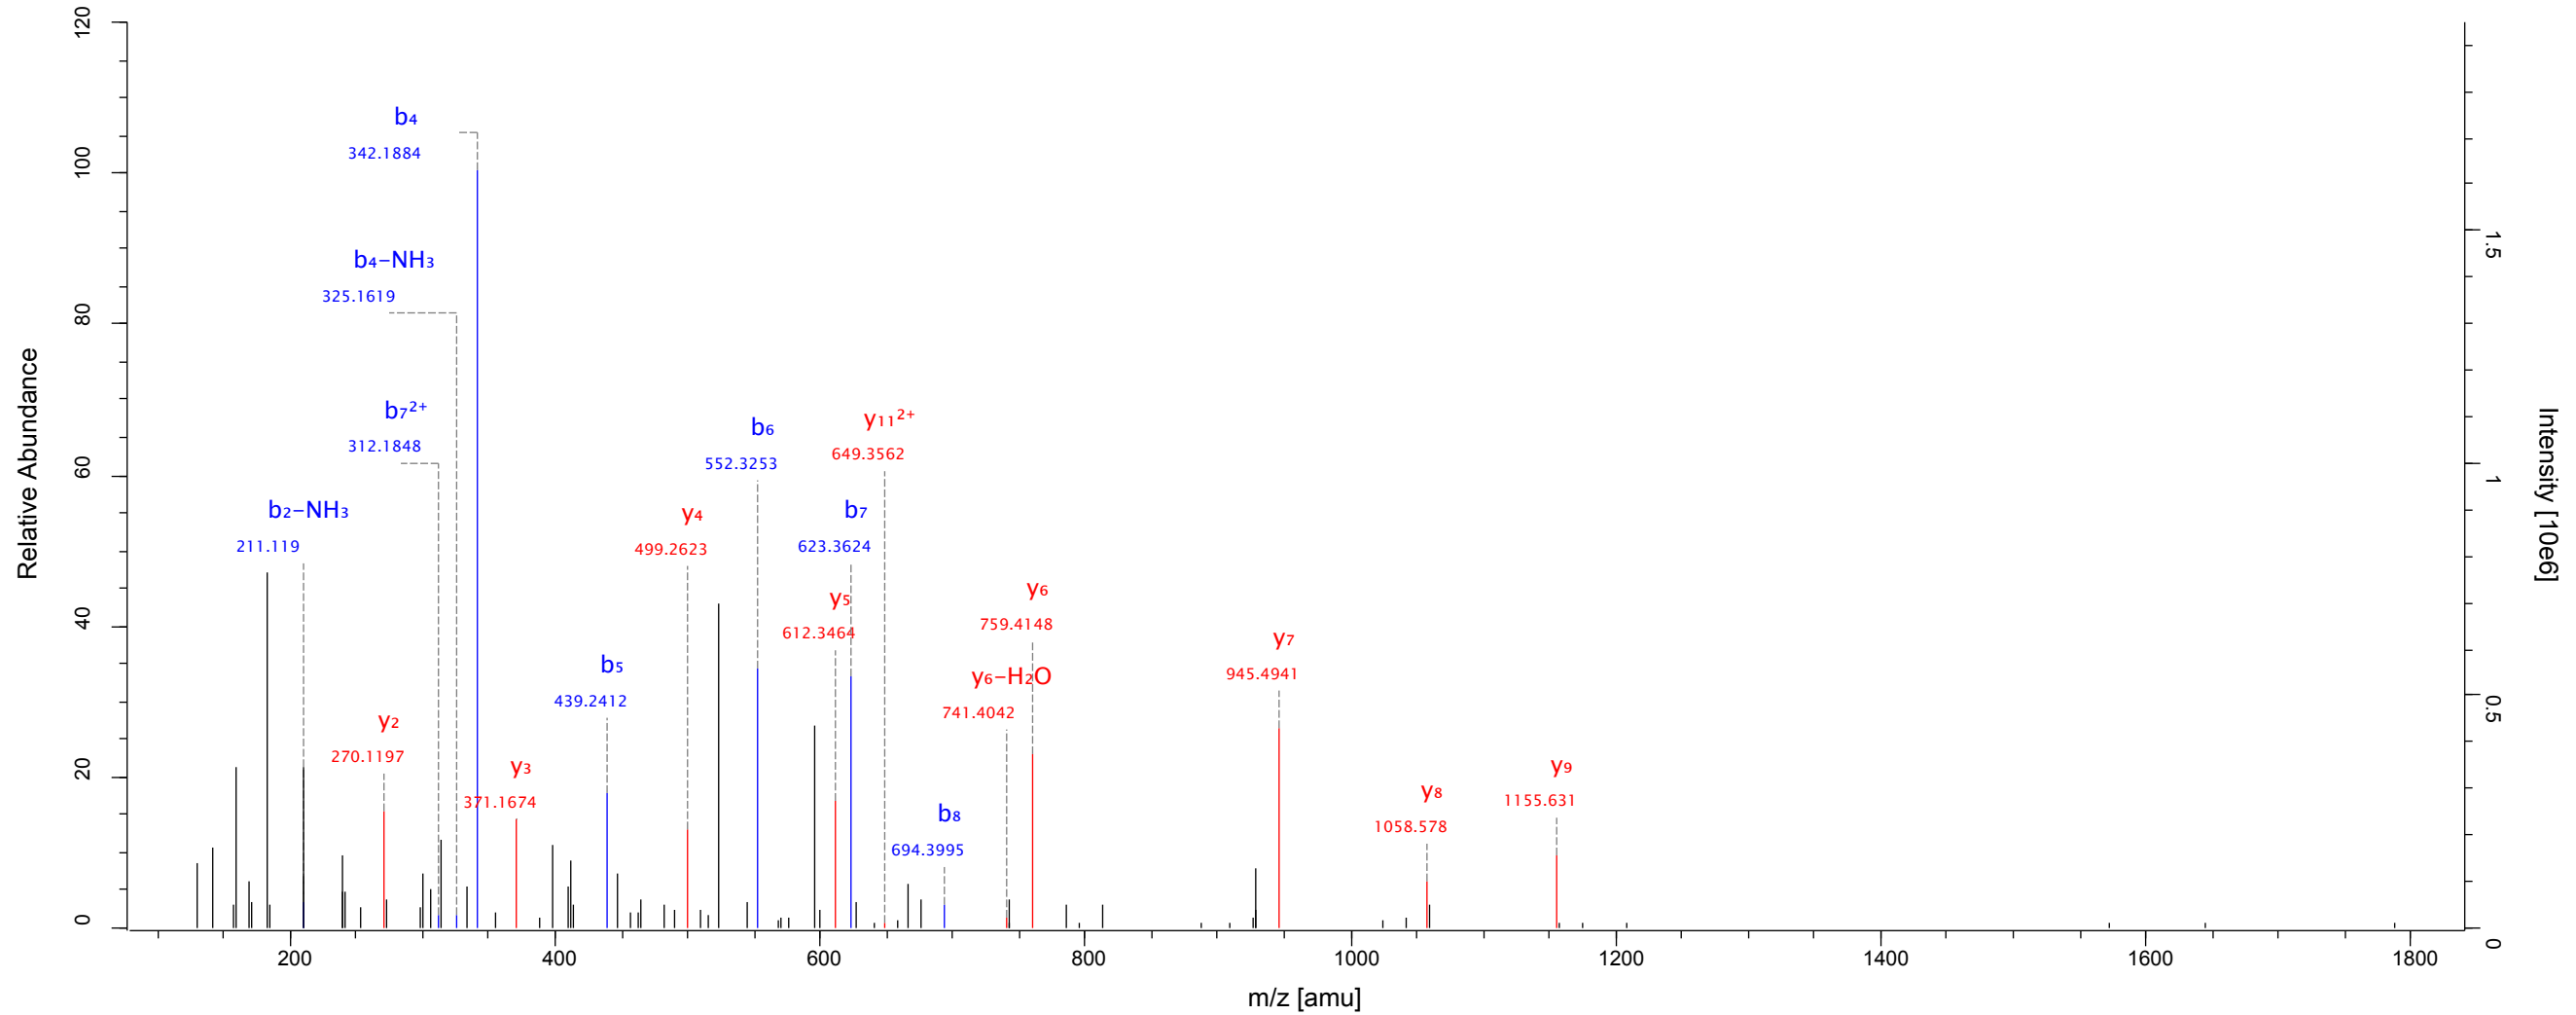

# peptide ID 139

Source: 20120816\_CO\_0340Gaje\_R02  
Scannumber: 14645  
Protein: pep\_secretome\_4410  
Peptide Score: 86.47  
Method: FTMS; HCD; 1

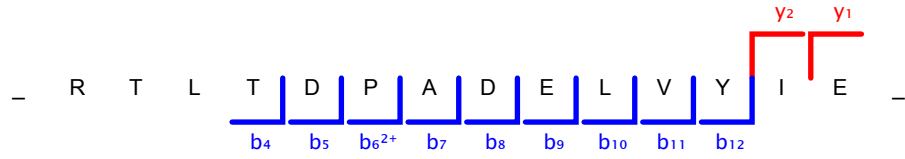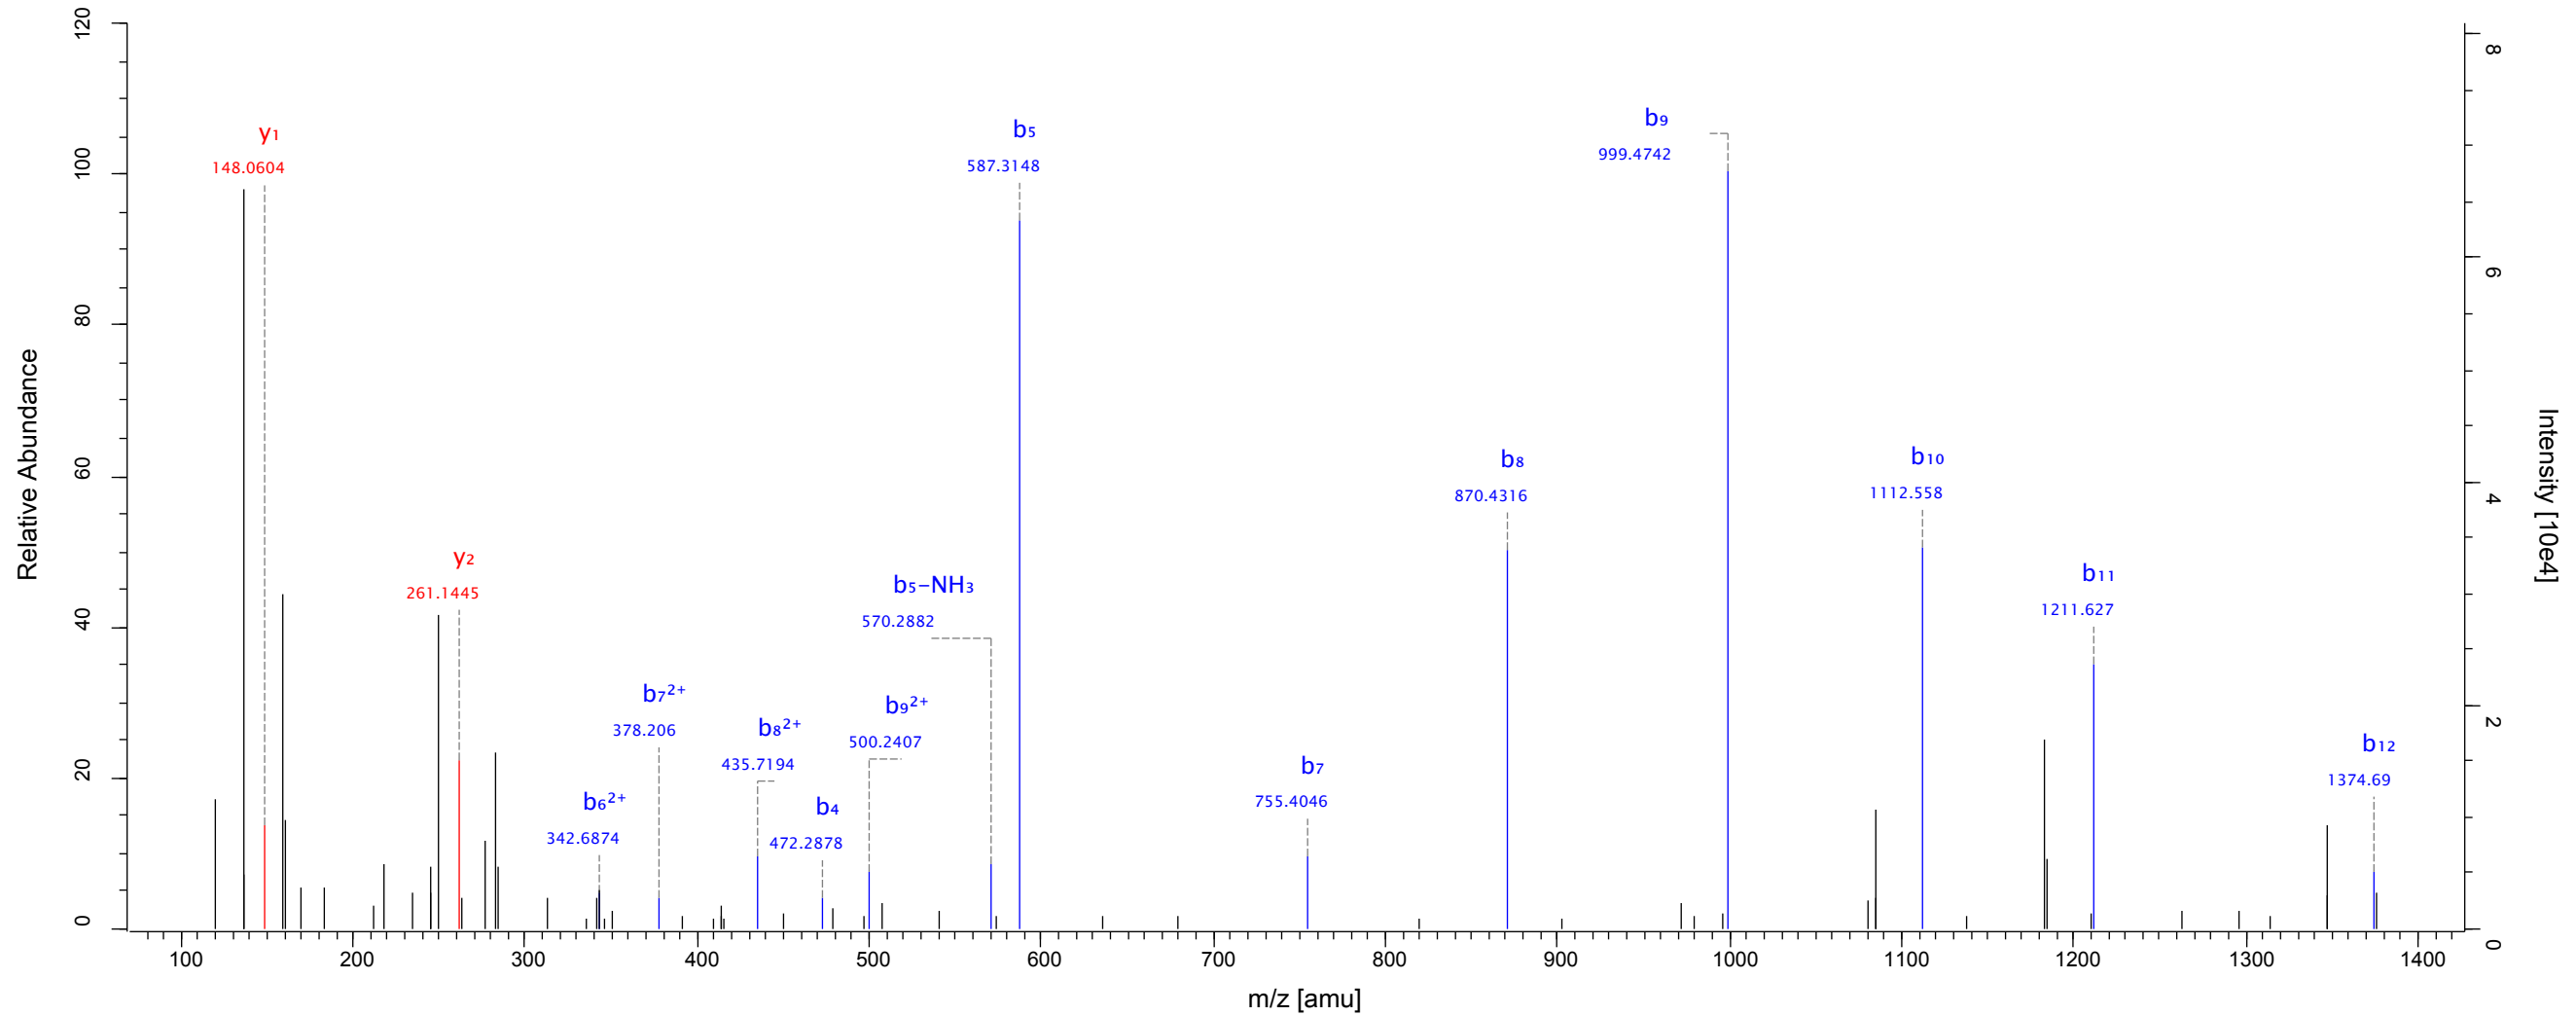

# peptide ID 140

Source: 20120816\_CO\_0340Gaje\_R02  
Scannumber: 9193  
Protein: pep\_secretome\_13893  
Peptide Score: 67.7  
Method: FTMS; HCD; 1

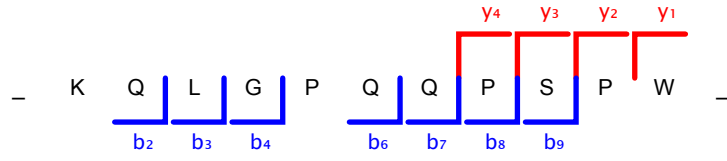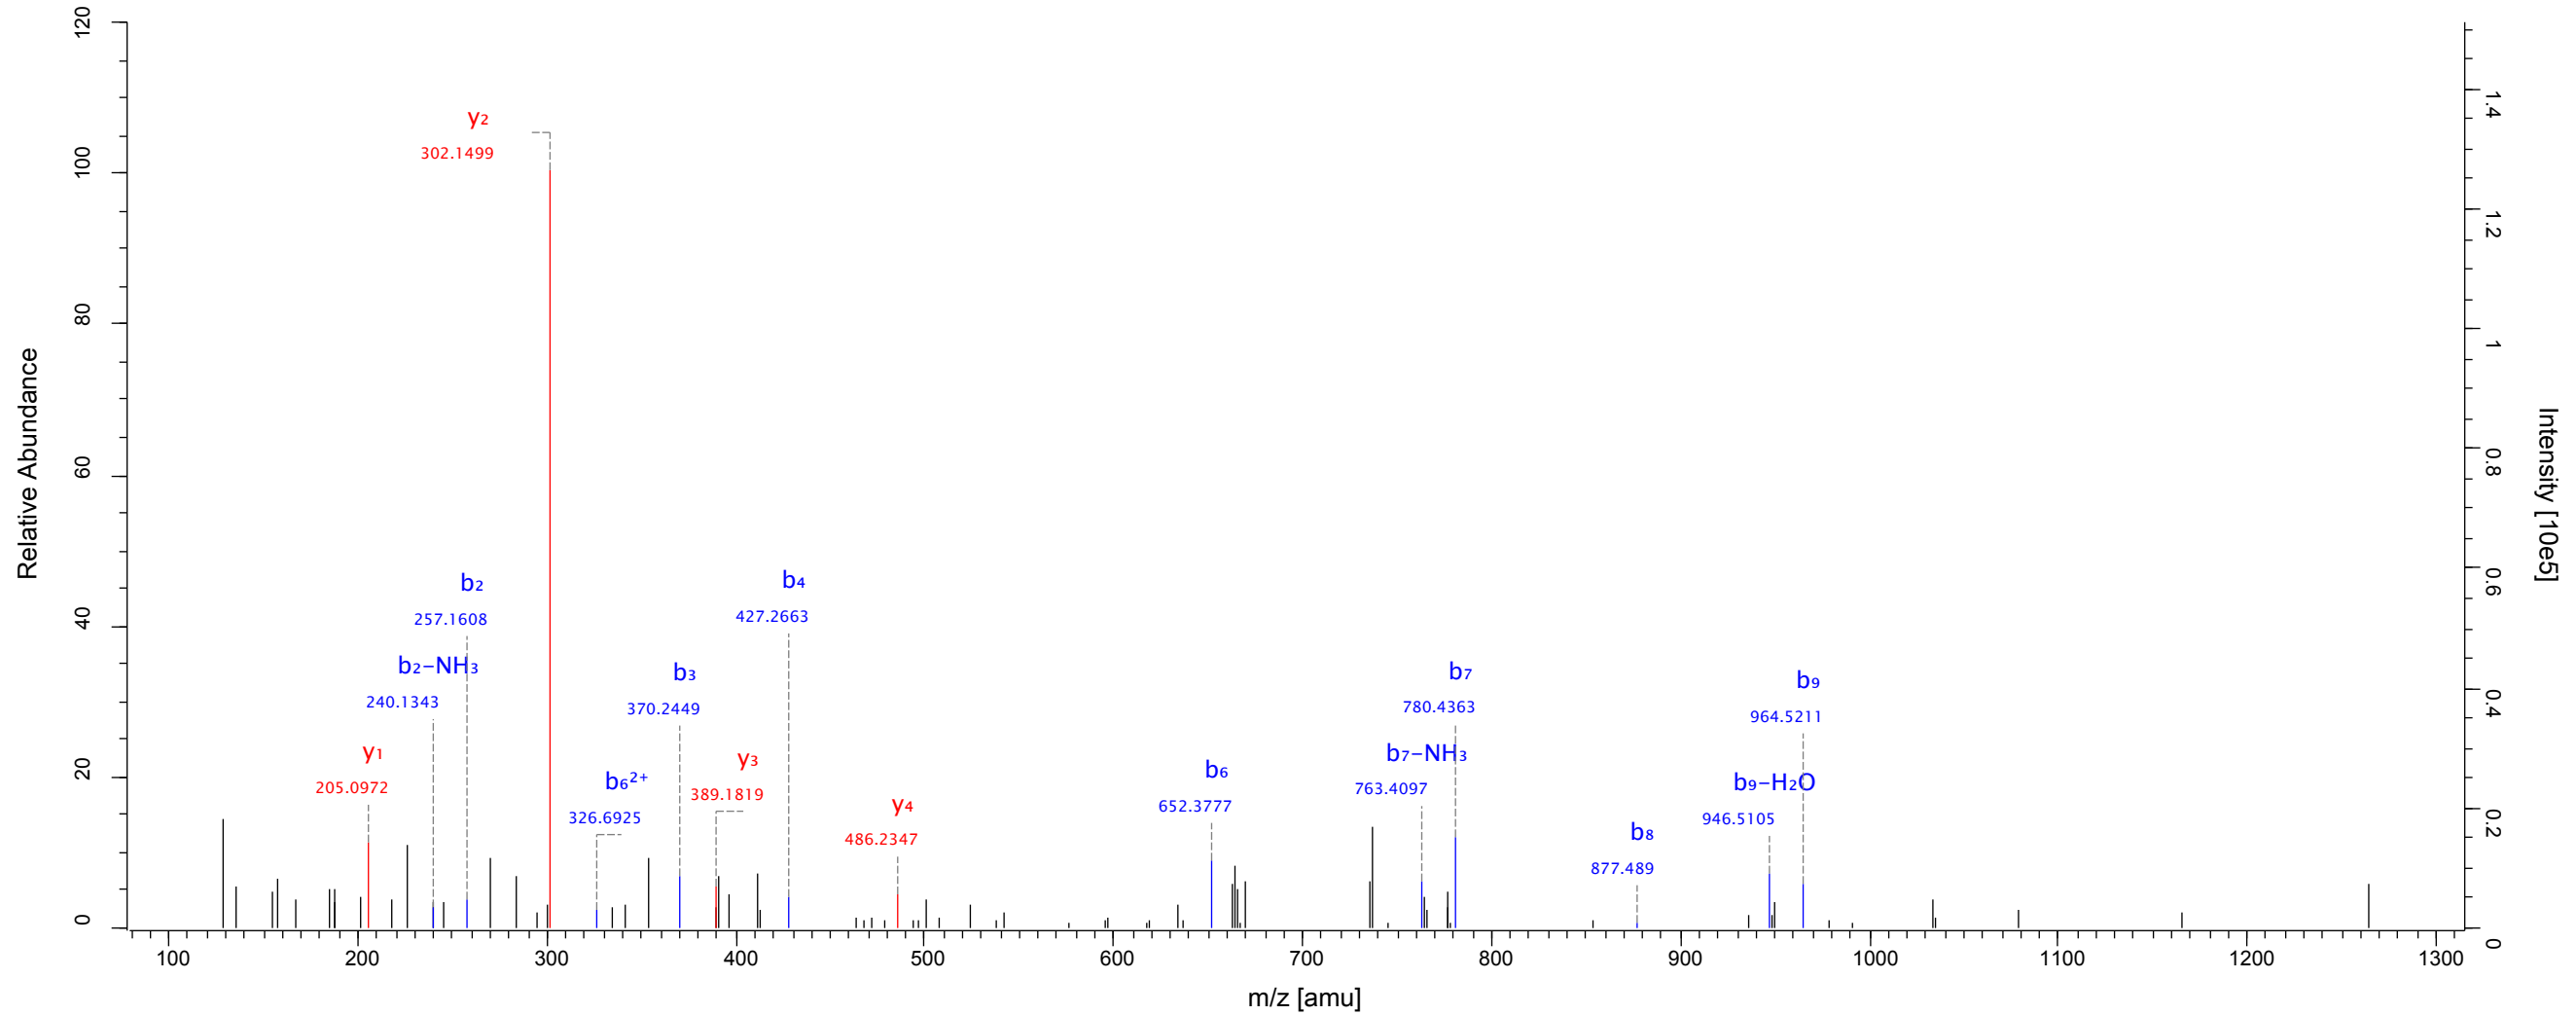



# peptide ID 141

Source: 20121106\_CO\_0340Gaje\_R02\_2  
Scannumber: 15102  
Protein: pep\_secretome\_14445  
Peptide Score: 116.96  
Method: FTMS; HCD; 1

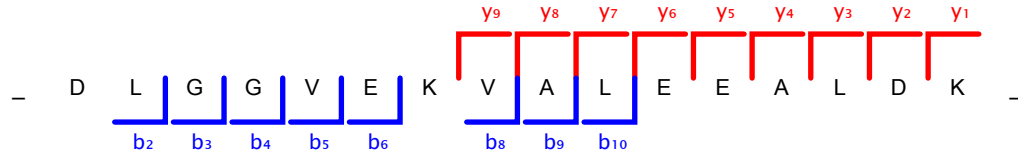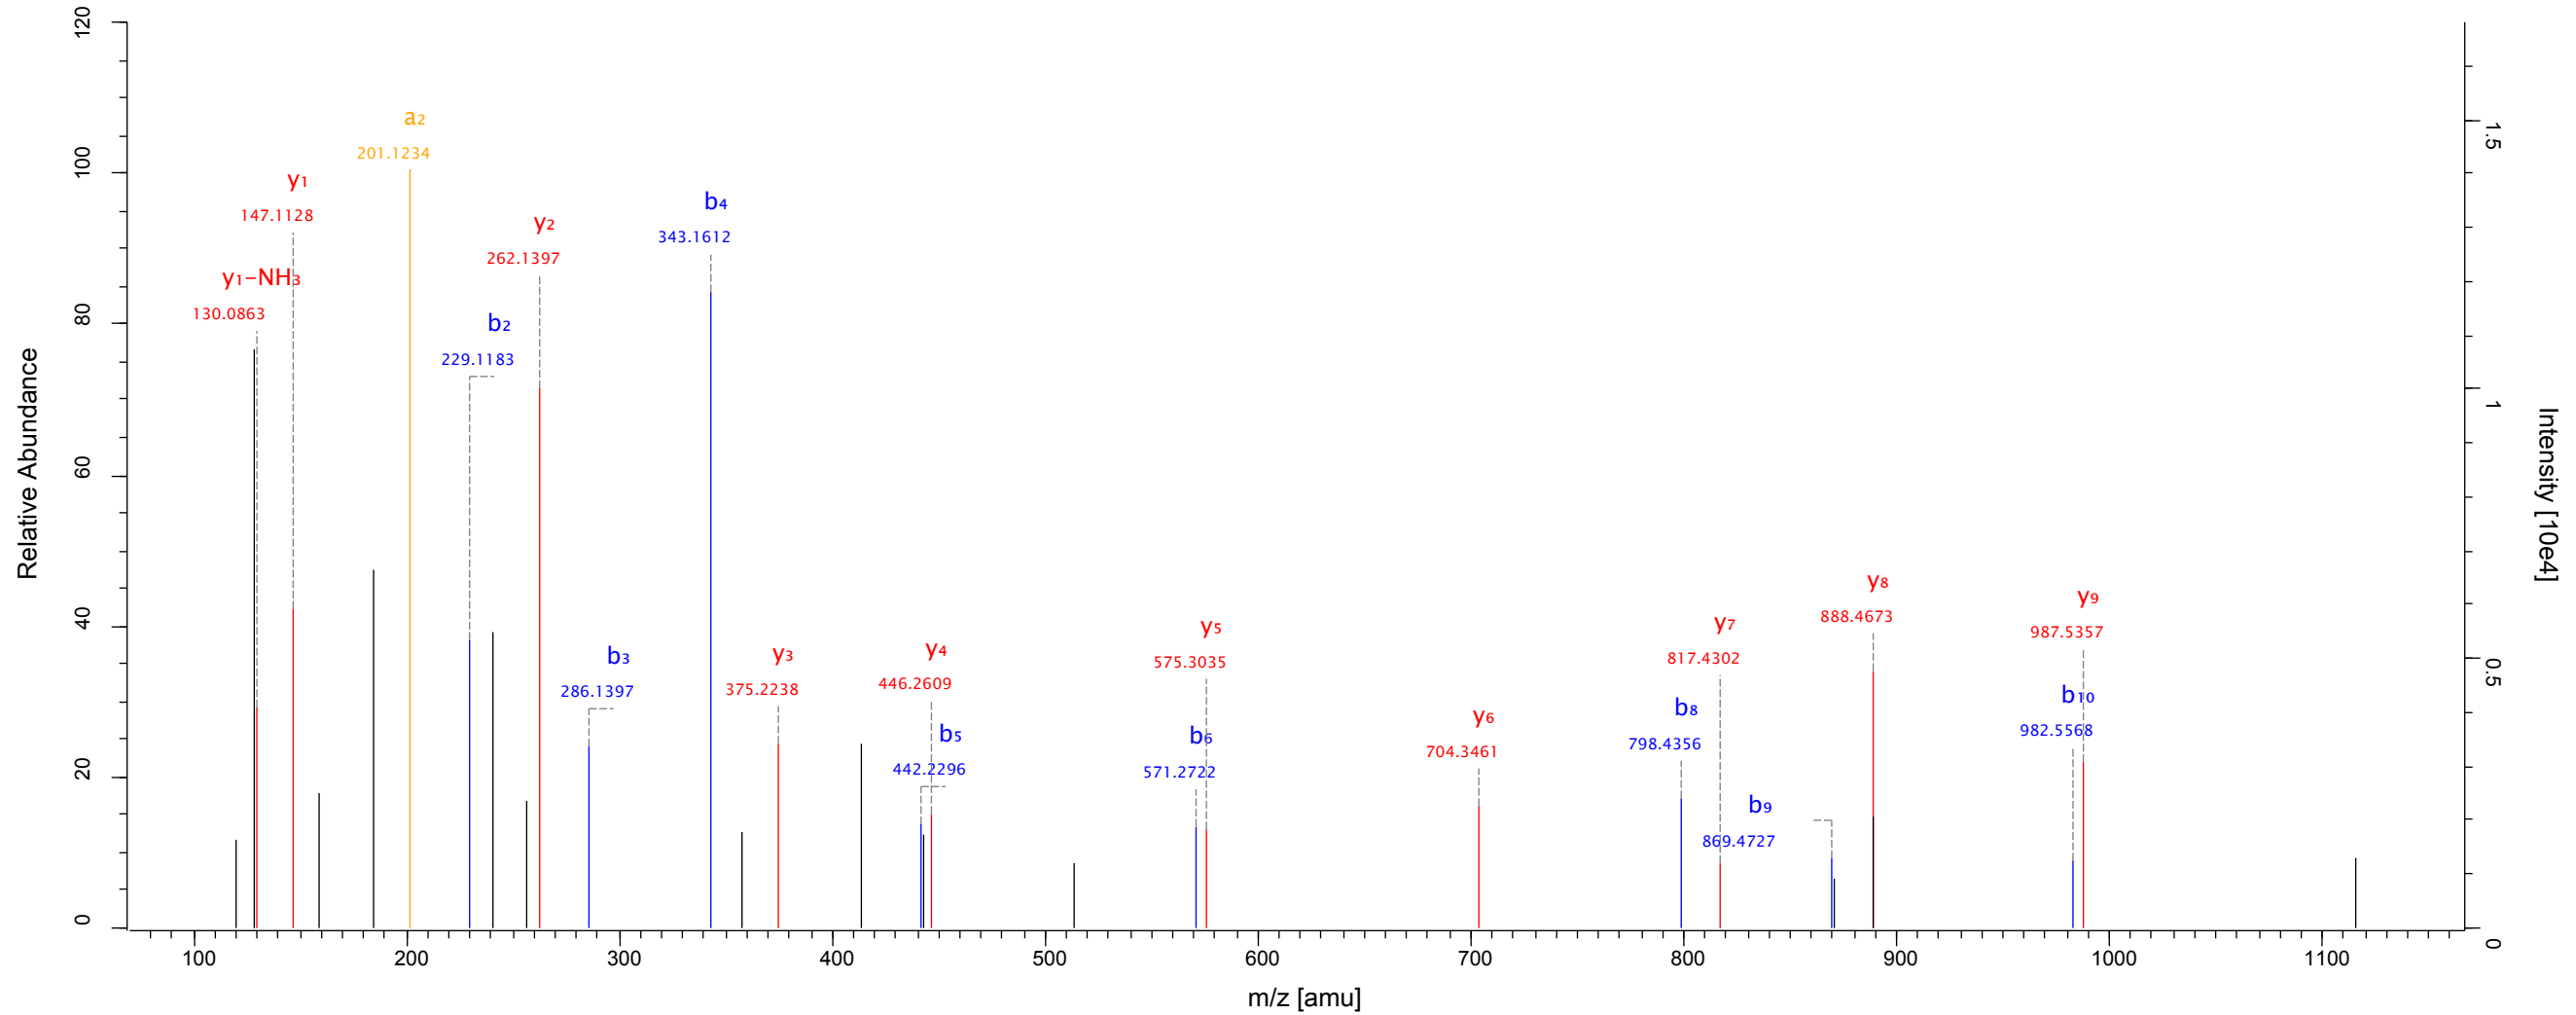

# peptide ID 142

Source: 20120816\_CO\_0340Gaje\_R02  
Scannumber: 9217  
Protein: pep\_secretome\_15969  
Peptide Score: 110.84  
Method: FTMS; HCD; 1

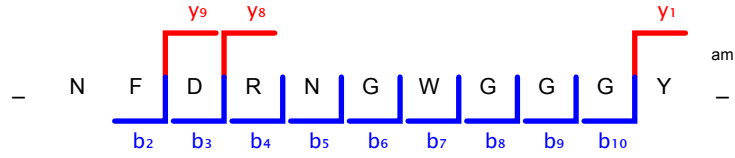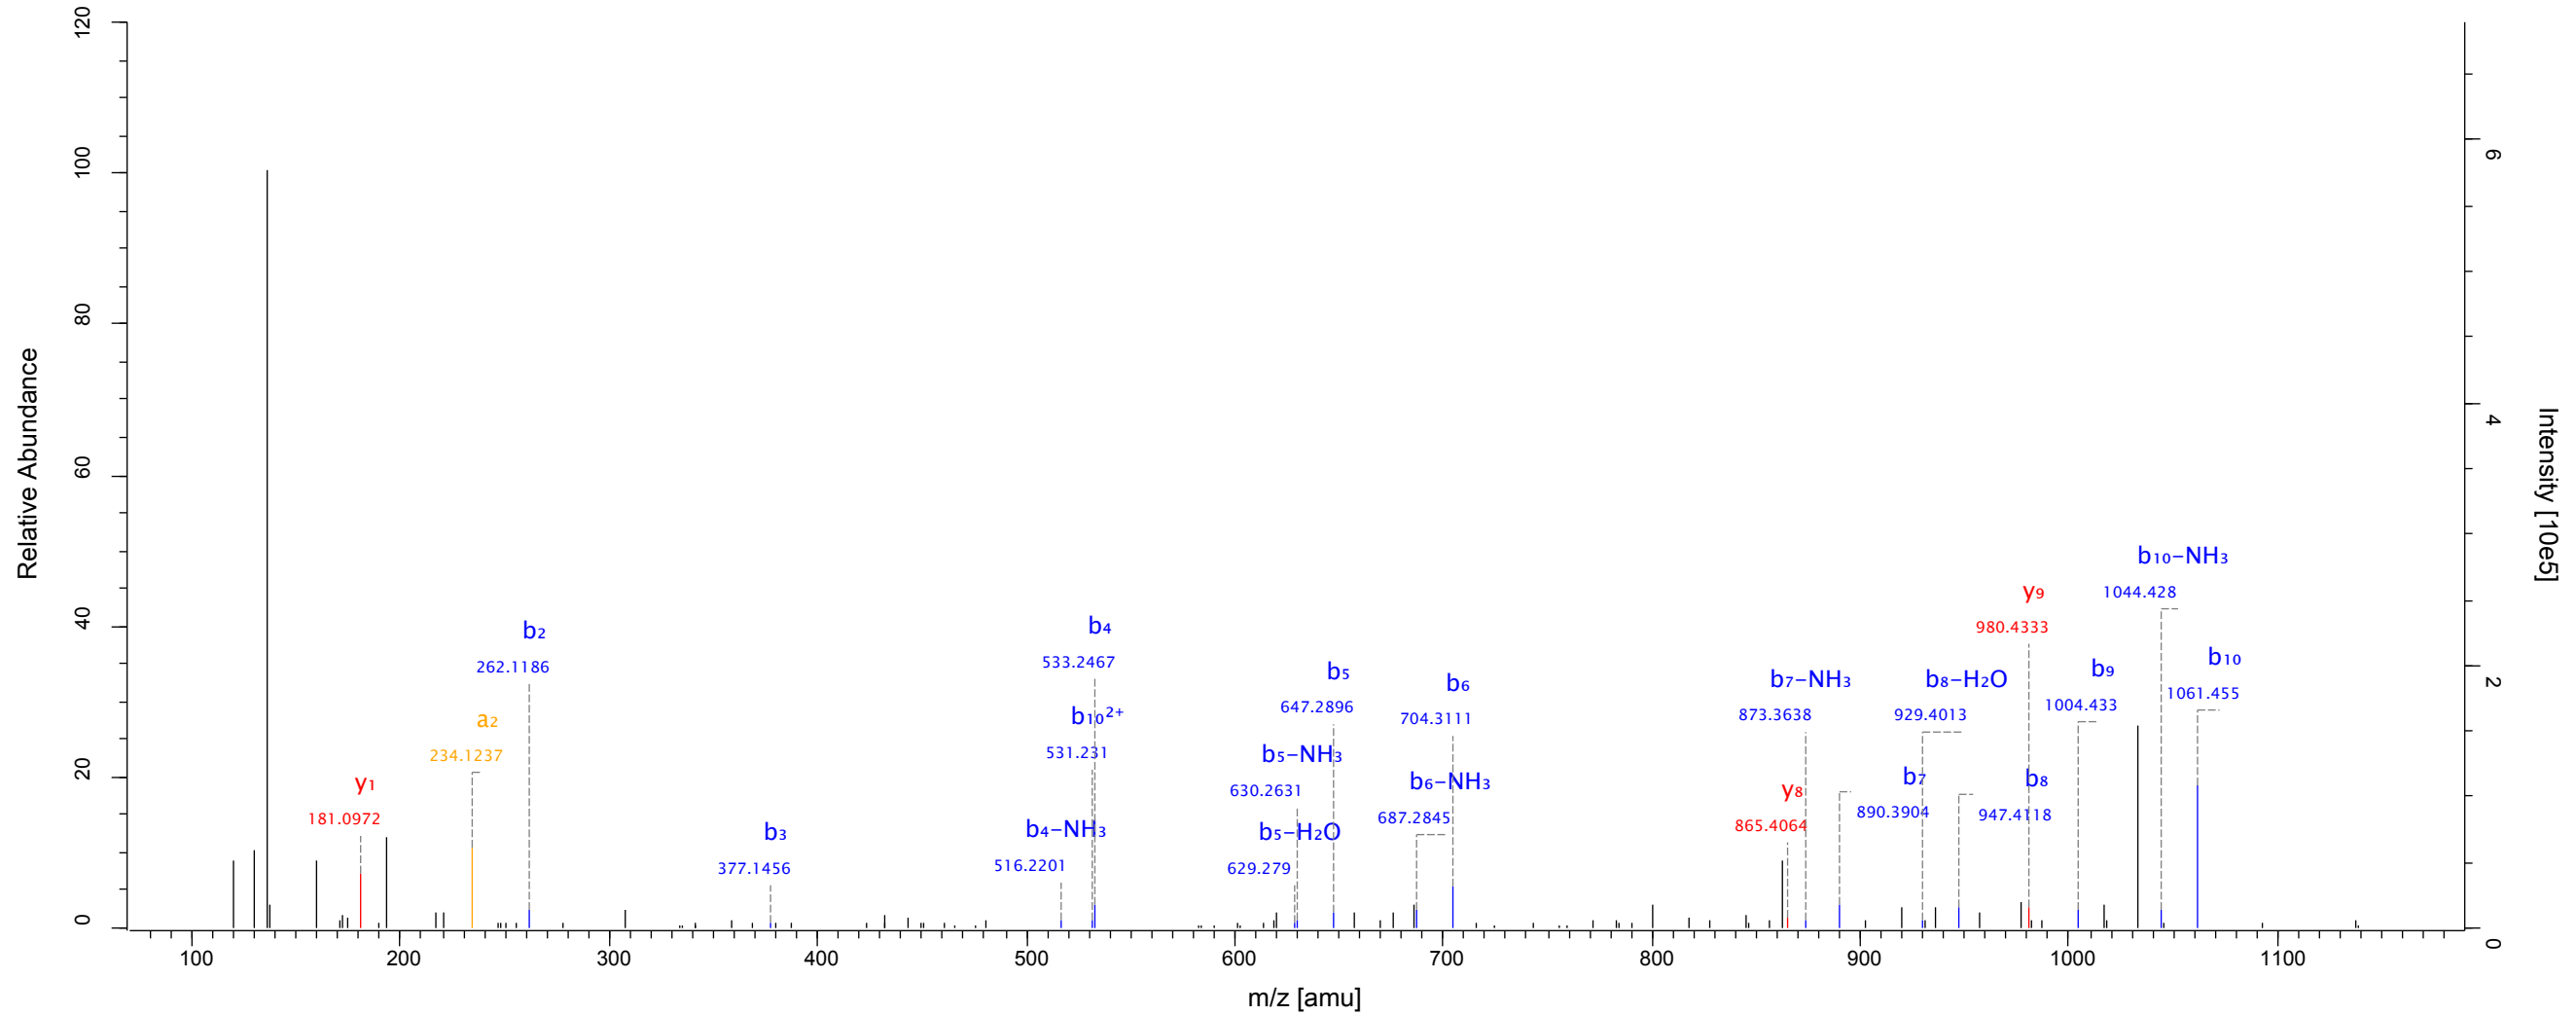

# peptide ID 143

Source: 20120816\_CO\_0340Gaje\_R02  
Scannumber: 8377  
Protein: pep\_secretome\_15047  
Peptide Score: 102.4  
Method: FTMS; HCD; 1

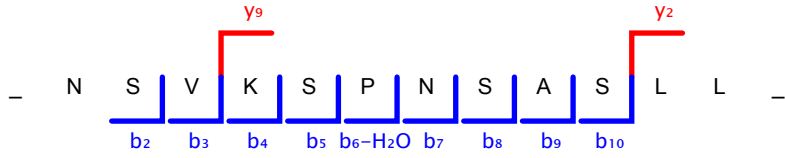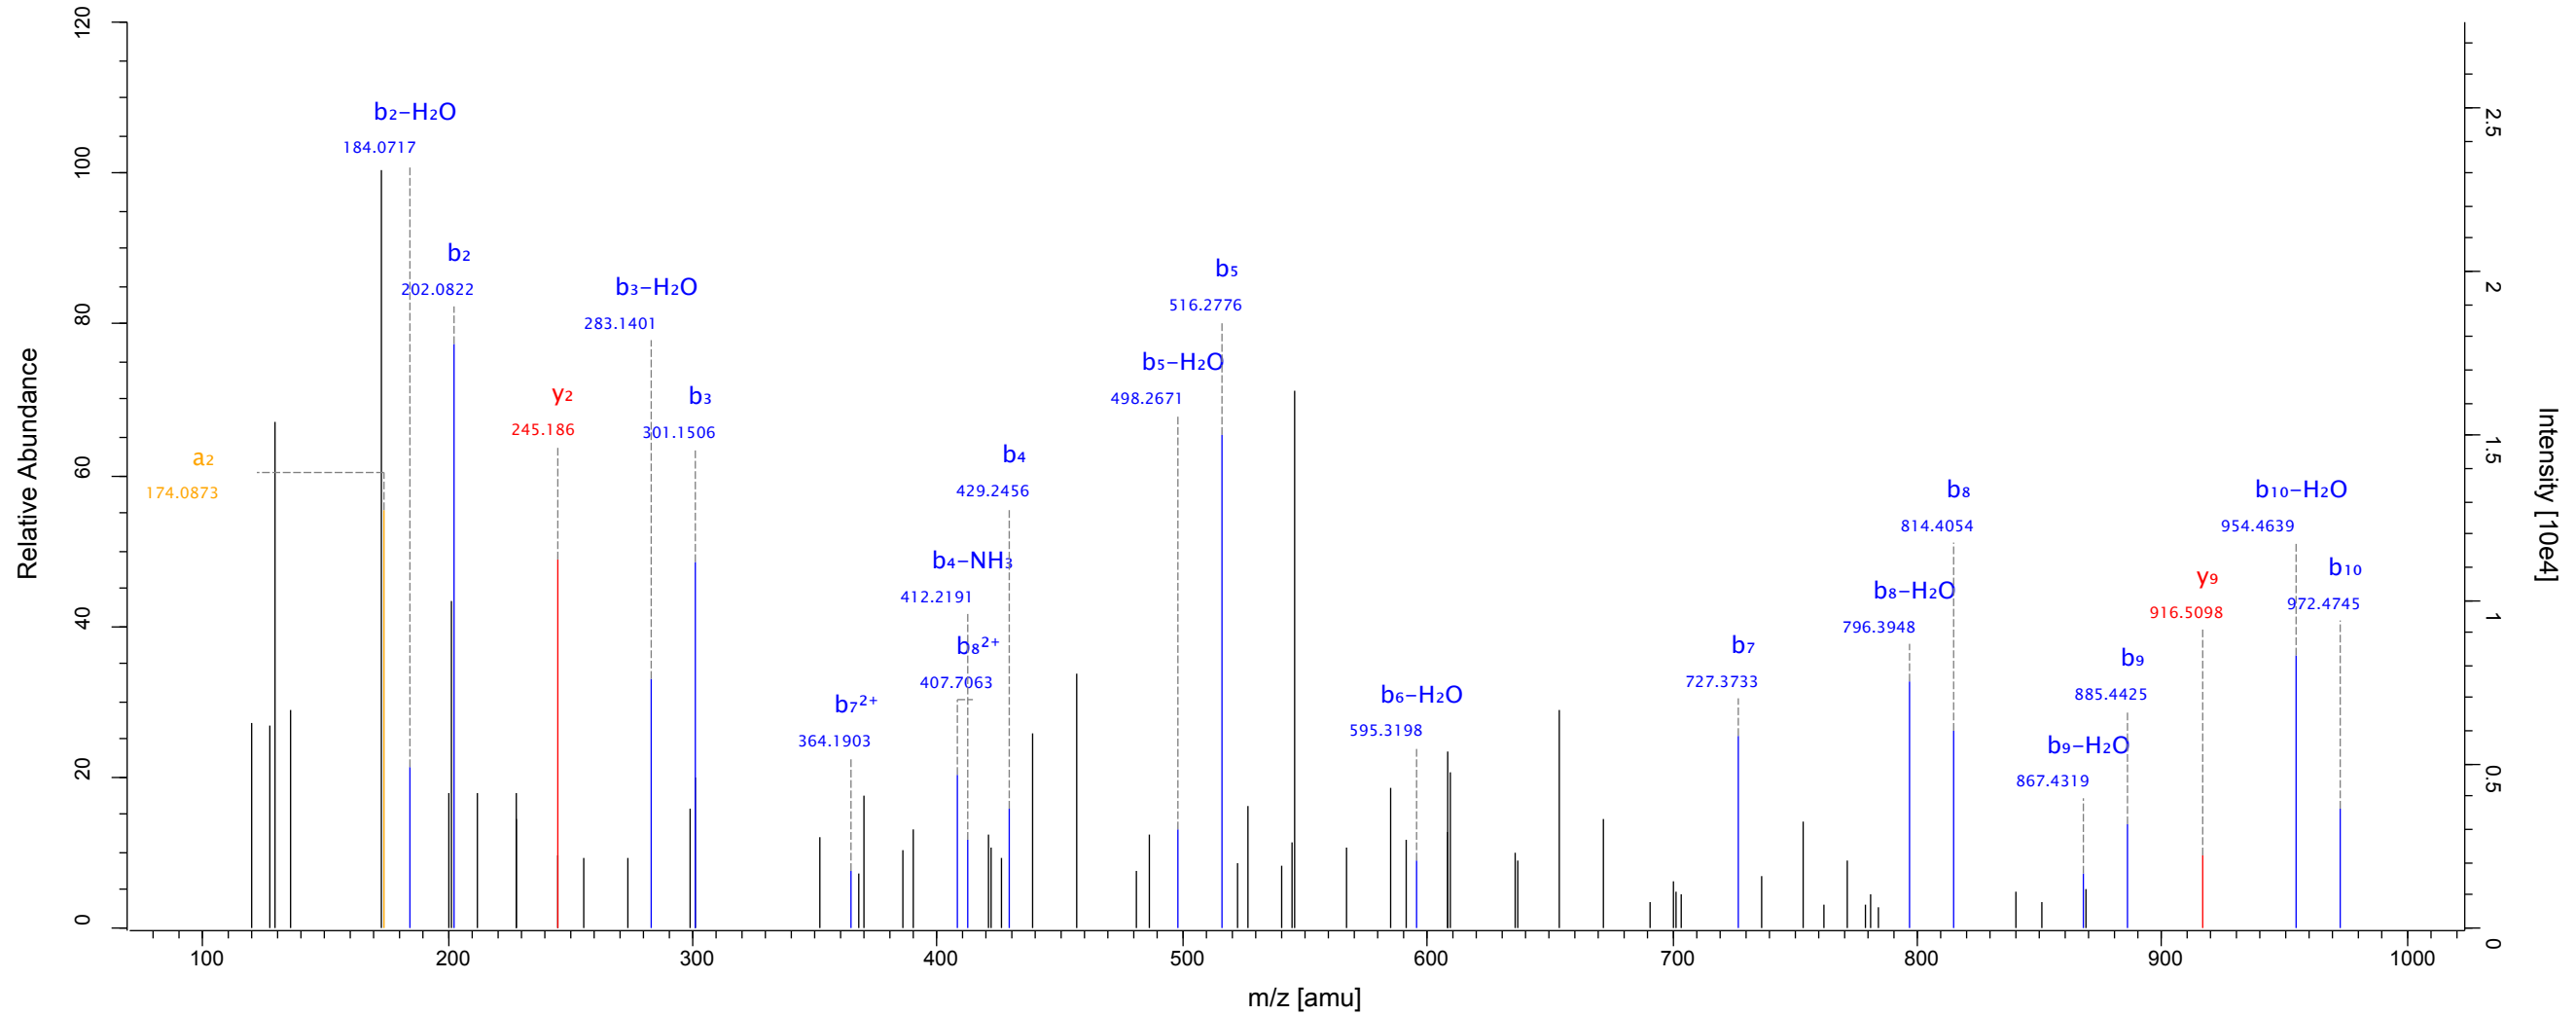

# peptide ID 144

Source: 20120515\_CO\_0340Gaje\_R01  
Scannumber: 15220  
Protein: pep\_secretome\_2821; pep\_secretome\_34663  
Peptide Score: 104.52  
Method: FTMS; HCD; 1

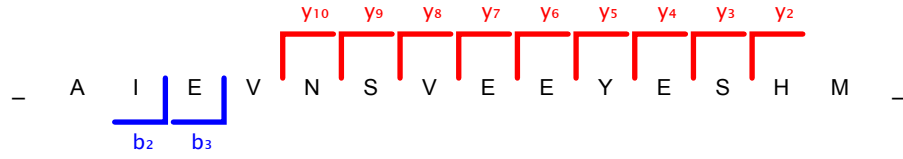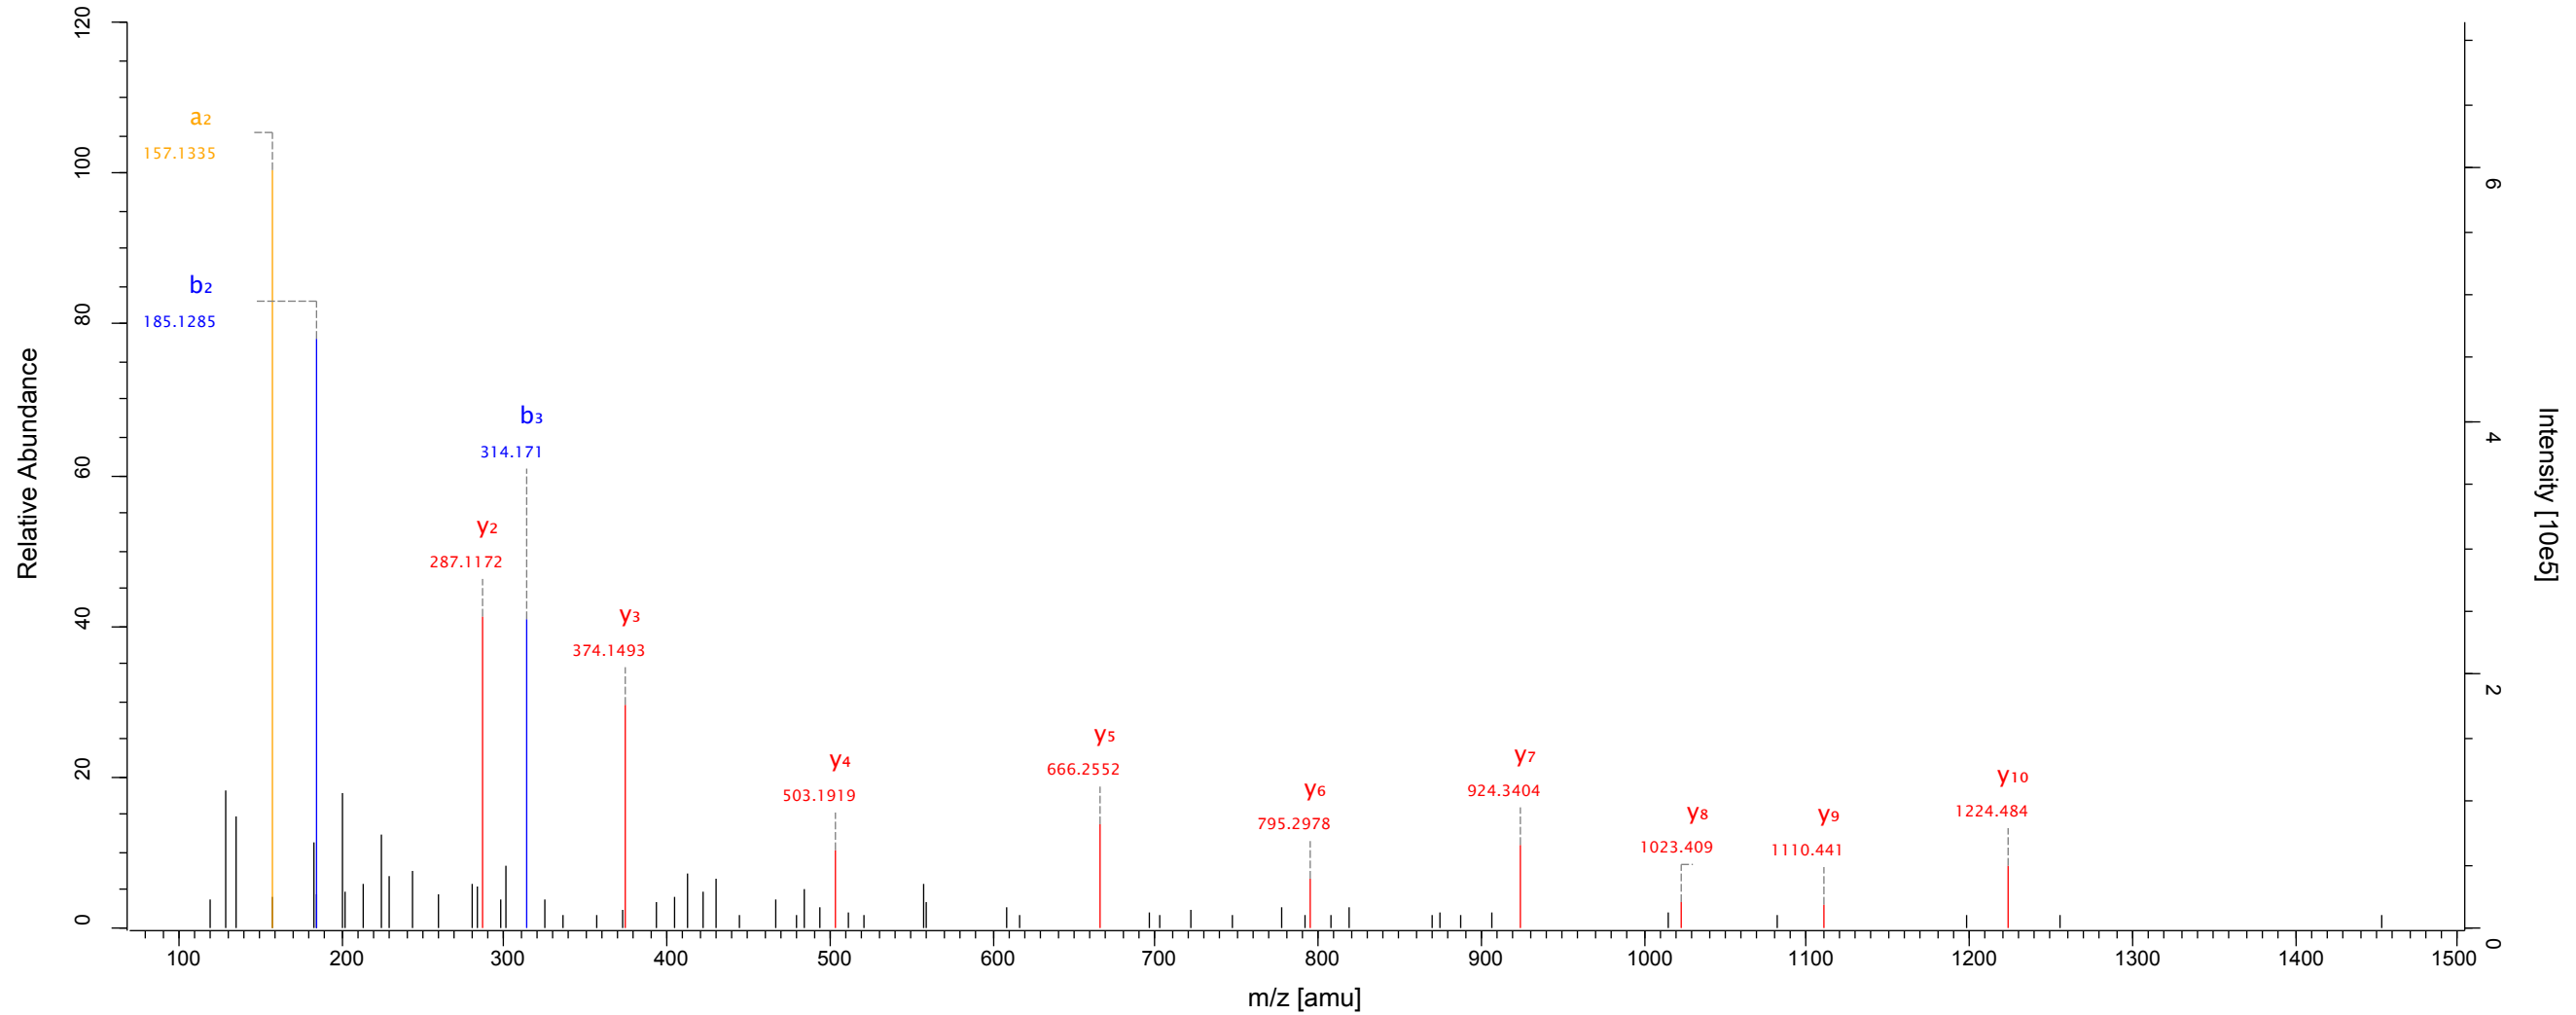

# peptide ID 145

Source: 20121106\_CO\_0340Gaje\_R02\_2  
Scannumber: 9377  
Protein: pep\_secretome\_2821; pep\_secretome\_34663  
Peptide Score: 70.49  
Method: FTMS; HCD; 1

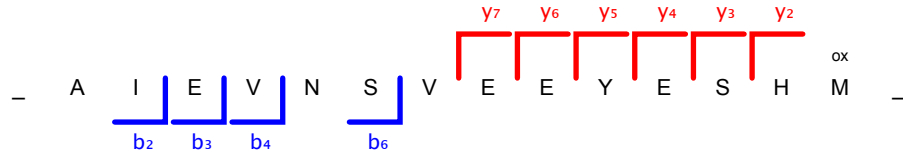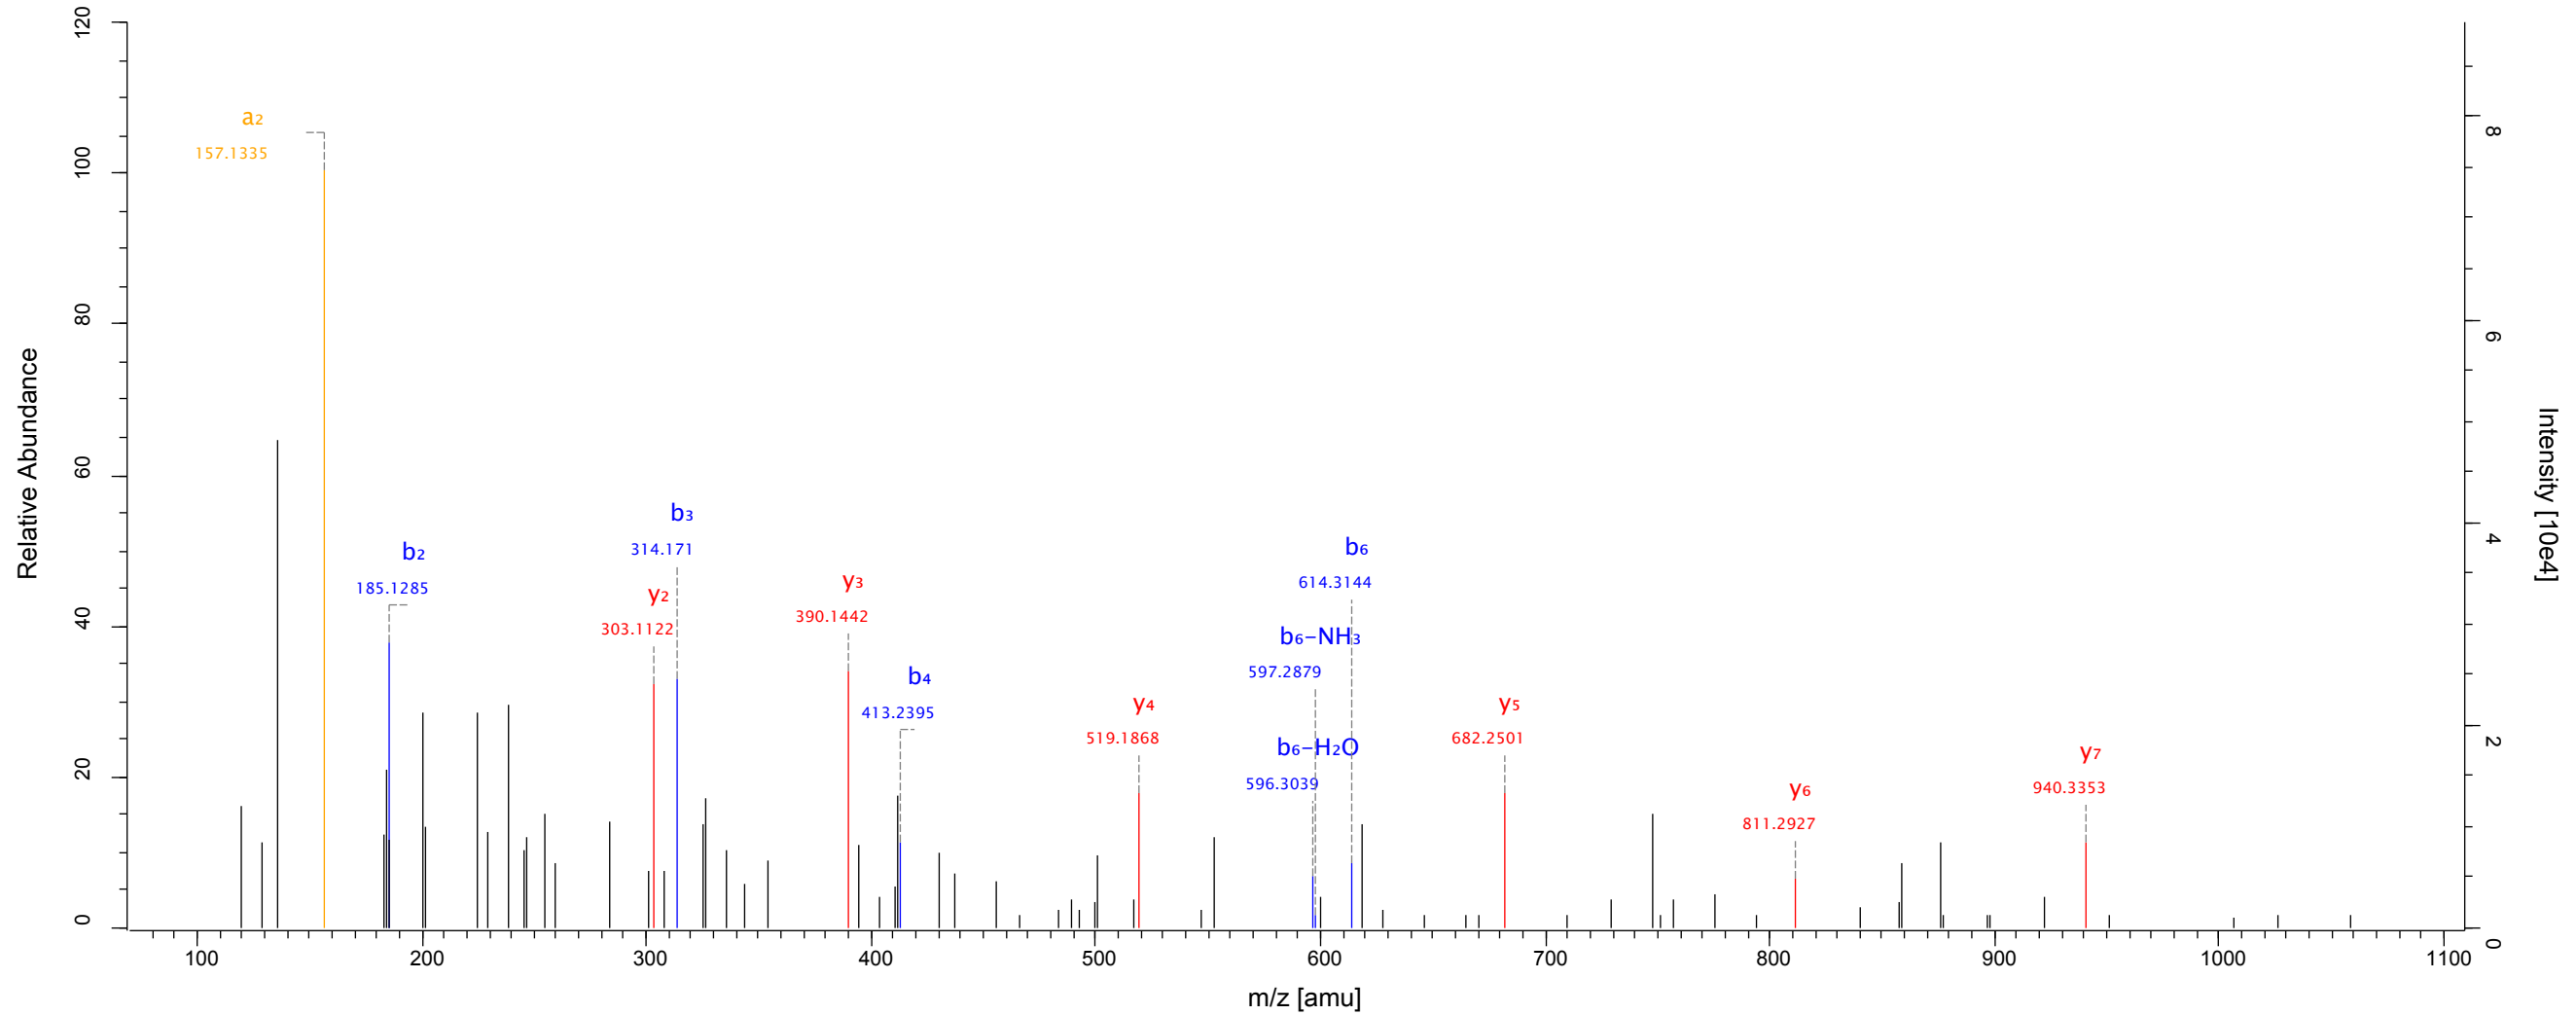

# peptide ID 146

Source: 20120515\_CO\_0340Gaje\_R01  
Scannumber: 21945  
Protein: pep\_secretome\_20173  
Peptide Score: 70.37  
Method: FTMS; HCD; 1

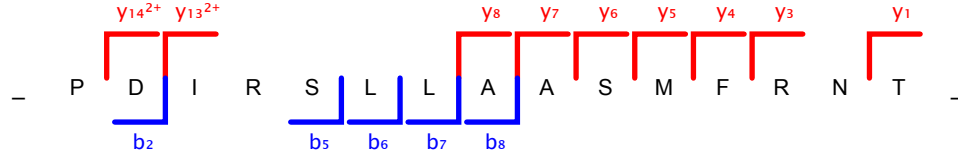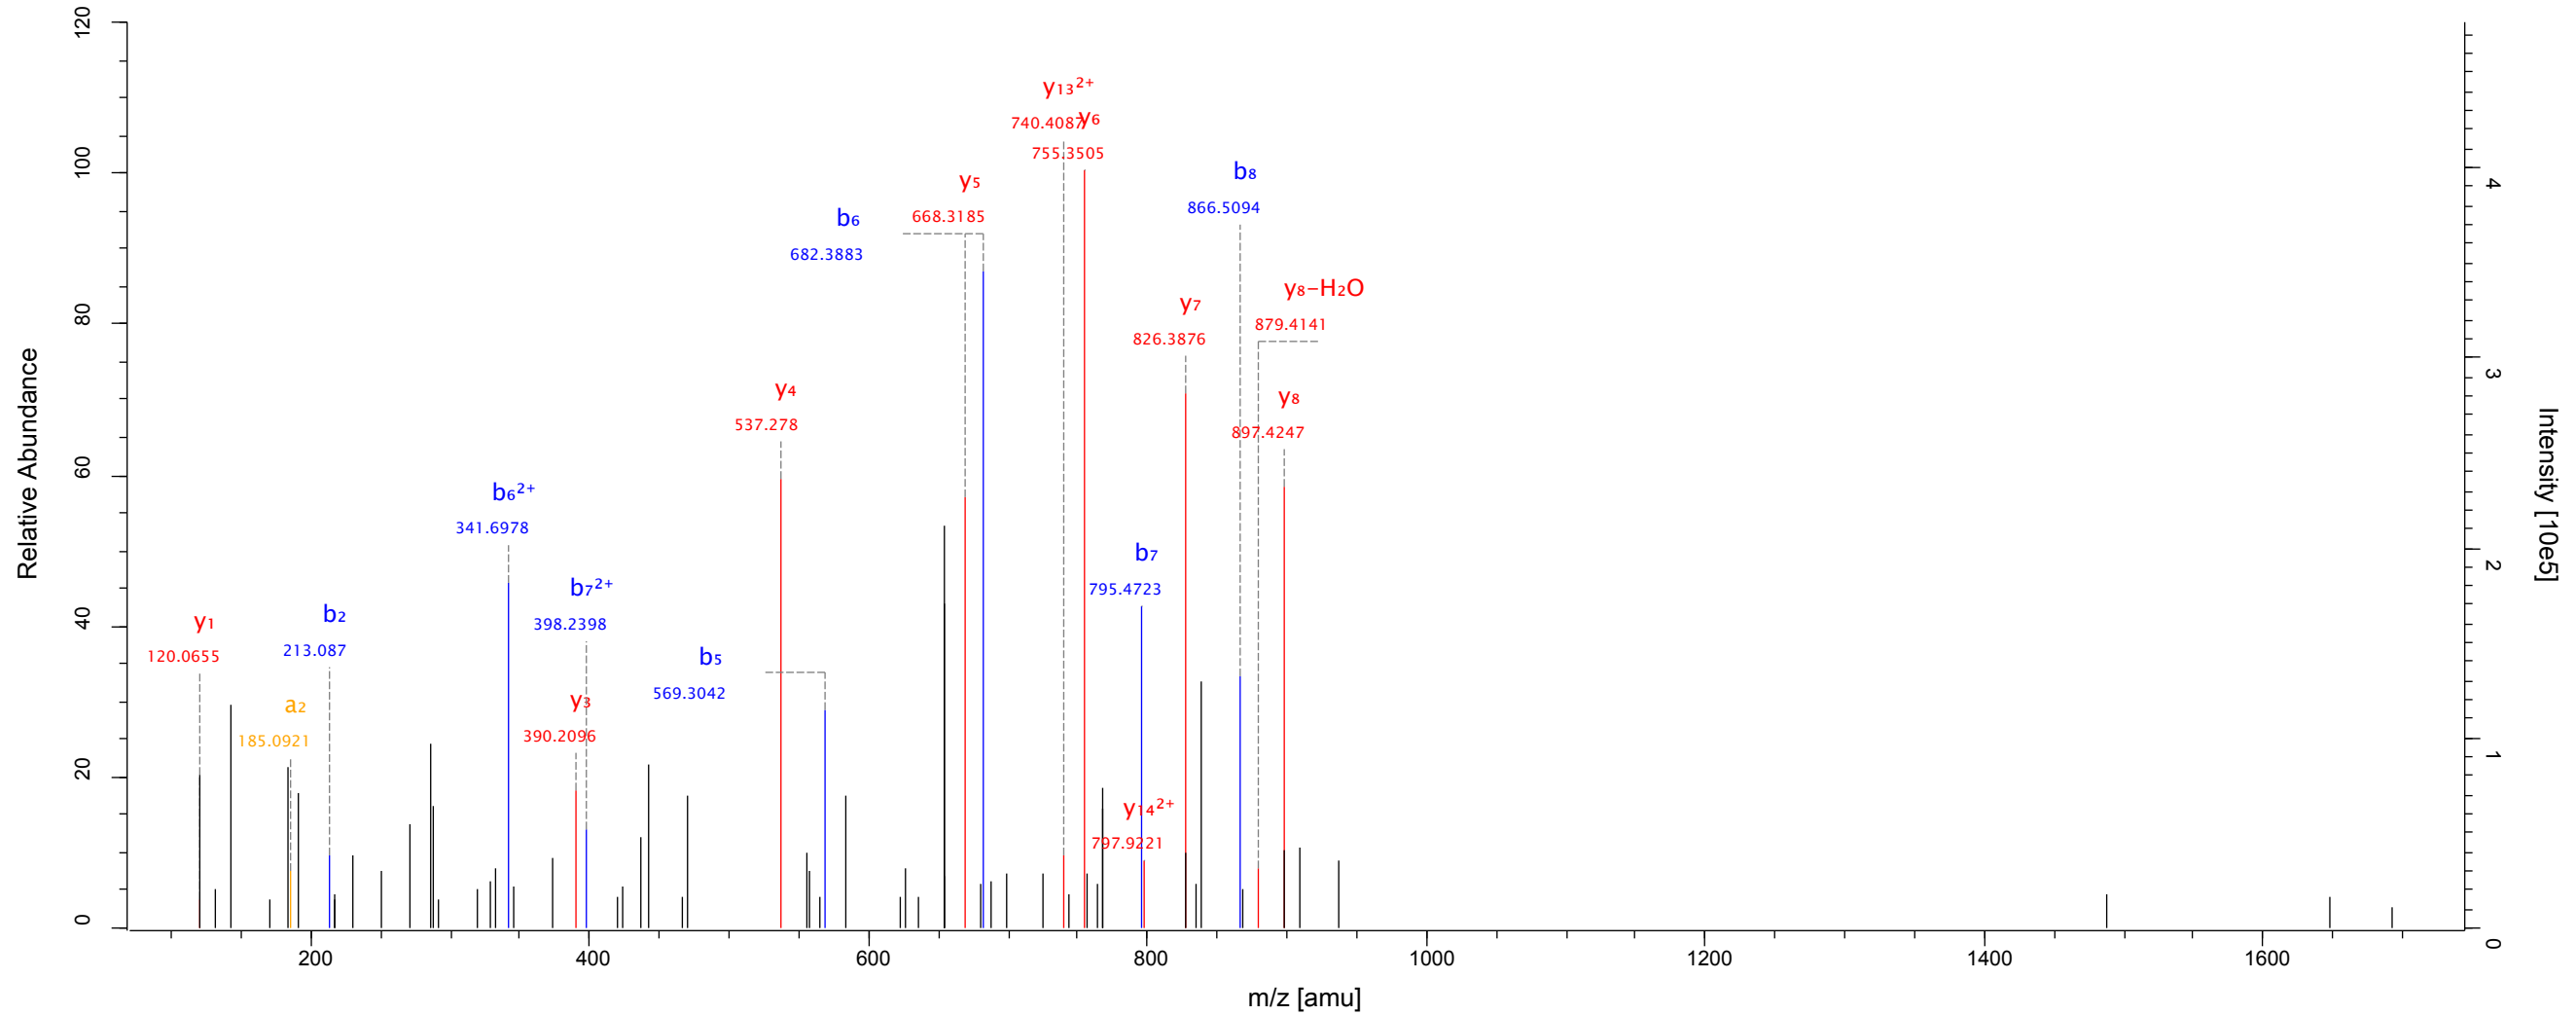

Supplement: 1471-2164-14-906-S9.pdf [file 1471-2164-14-906-S9.pdf]
