# Supplementary material for: The neuropeptide complement of the marine annelid Platynereis dumerilii
Source: PubMed Central journal article supplement (PMC3890597; doi:10.1186/1471-2164-14-906), 2013-12-20
Supplement: 1471-2164-14-906-S8.pdf [file 1471-2164-14-906-S8.pdf]

>IRP-3 [GenBank:KF515921]  
 MGTAFRFSWHL LCLFATSSHGGLTRTCLGDTLTKRGLCGPGLSSALQIVCPNGYHYGKR SAGTEISPOVSAESPF  
 MDKRLAMSI LHNRGKRGIICECKHKCSFSELKEYCHVPVKRSFLSTDKPKLSQDQMNLI DVKWGLDDEGATSRL  
 NIGDIEDSDVNNKYLPSSELTQDERNTRKDSQIGQLVRLLLDKSSAHNNI\*

>IRP-4  
 (...)YGRKRSAGTEISPOVLGKSPFMDKRLAMSVLHNRGKRGLICECKHKCSFKELKEYCKTPG  
 KRGSLLLTQAQPKPSQDQMTSNLIDVNWGLNNEGASSRLANMEDIEDDFDVTNQYLP (...)

>IRP-5  
 (...)CHNDHLVKRGLCGTGLSTALKKLCGMKGYHHGKR SAVTDTSLQDLTKSPFVDKRLAMSVLHNRGKRGSQGITC  
 ECCRHPCSVKELMEYCKSPFKRSLLLTAQPEPSQDQMTSNLIDVNWSEFEDESAASRLDSMEGLDVKNNYLPSPKN  
 HDEINSRQIGQLVRLLLNMTSAHDTL\*

>bursicon-A  
 MTGAAAKRSFVCGFICCLICSVASEGNTTEVDLPTGIVVPACRIRWIVHRIELPHCTQKRLLSLACKGQCESYTOYS  
 TDTNDIERVCSCCQPHGRKLRRIMRCRNPKTFMPEIHVFQVYIPNSCMCRPCSVSIDNVPDVVNPLEAMSDNPPM  
 EFMLLRHK\*

>bursicon-A-2  
 MRGVASKRSFVCGVCCILICSI LGSTEVNLTGIAVPSCKTHFIMHRIELPNC TRKRLMSLACKGECESYTOYST  
 DTNDIERVCSCCQPHGR (...)

>bursicon-B  
 MTTEWCTSL LLLVPAI LLAHCP LSSASCNTDFTEIFLNKEKPYEYNGRPARLTCYRKVTIRKCEGCTSEVSPSV  
 VRFPGFKKCKCCRESRLDEKSYLLPCYGNALIPGETVRLHIKEPMDCCQSECAM\*

>prokineticin  
 MANIFHVCLLLMVFATI QGIPSKRGRSRPLFVGRKRYPPYMPYRRRTDYHGKRGRLQLLFVGRKOPTYEMS CRTDLDC  
 PSSHCC LADLENSSGTC TPLRHMEQICTTSFYDGISYPMPCASGLSCAISPEKRF GICTSSWDEEEGEEQYNY\*

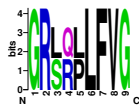

Peptide logo generated from 2 amidated peptides of the prokineticin pNP.

### Platynereis pNPs belonging to bilaterian pNPs families:

>glycoprotein-beta  
 MNKGGGHKQOLLWLLSIMVIAMAVMTSSGHPWTGDSRAKQKRNERNFNGNSVTSCLYHWHKIAVNRDYLAEANGTII  
 PCSAIVEVSI CAGGCDTSEIPDYKVPFKIINHVC TYGEVRPRTVRI CGDNHPAPFAKVFDAVSCVQCPCSRSNAS  
 CESL\*

>vasotocin-neurophysin [GenBank:EF544399]  
 MQFSRPTFTLOYGSAVLLTLVCCSACFVRNCPGGKRSMDLPQIHSTROCMRCGPQGLGOCFGPNICCGPSIGCY  
 INTLESEECSKENDVRTPCDITAEICGVGQGRCCGADGVCC TDEKCTLDSSCDKLDMDKPRFSPDILRMLKRIFDR  
 RSYPGRRK\*

>NPY-1  
 MTQILKLSLLFLILLGDKLLTCGKVL EEMPTLQOQIPLKPV RPNRFRNKDELH SYLQSLRDYYSVIGRPRFGKRLSS  
 FLQRSPDSFGISESDNKGLGKTSDFSIEESPRLSFRKILLQSMRH\*

>NPY-2  
 MLKFYCYLTALCILLTLVFSADMRGPPLRPAVFNPKELRSYLKSLNEYFAIVGRPRFGKRKSPMPNFEEKRTLIT  
 PEVFMVMDSDGDGCIDQTELATFTSL\*

>NPY-3  
 MRWTYLVLGLDLLFAVFLTFKLTSAQNMEGPPRPAIFRTPQELRDYLSDLNEYFMIVGRPRFGRSTRHHLIDTVY  
 DKLGLPKSEKSS\*

>NPY-4  
 MNLLFMWSTLVALLSANLIISYPLTFTGFEEEDGLRLKRDPSFISSGPPVRPSSFKSPEELMEYLQKVRA YNVM  
 SRPRFGKRTIAEWYEGMDHKR\*

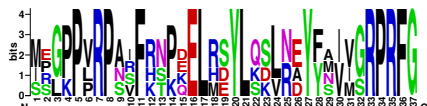

Peptide logo generated from the C-termini of potential peptides yielded by the four *Platynereis* NPY pNPs.

>RGWamide (JX412226)

MKLOGVVASWLFVGLVILEATYAADSGTSQIDKRRGWGKRDSEGEVDKRRGWGKRGALDPELESEADKRRGWGKRS  
SLEEME KRRGWGKRSTVEEEKRRGWGKDFEEEEEMDKRRGWGKRSLEEAEEKRRGWGKRLTIDALEDGIDKRRGW  
KRSQMEDEEEKRRGWGKR SWPKDSAEACSEMRAVYVYINSAIETEGMRVKQCGGDPPIVTP\*

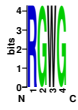

Peptide logo generated from several identical peptides of the RGWamide pNP.

>AKH-1 [GenBank:KF515922]

MRAWLVLLVACIVIAYOAHSTDAQFSFSLPGKWNGKRAALGWGKRGE CGDFDPDAIFNVYRAIQAEALRINECMQ  
QKLEEESKKH\*

>AKH-2 [GenBank:KF515936]

MMRLWVYLVTVCVMLFAFFPHVCHS QL TQSLGWGSAGSSGKR SVKSPIYYGDDDDYDVRQVRKNRLTLSEALC  
SQDEKDAISKIKLIQREVVRQRYCNRKK\*

>GnRH-1

MQNCWVSCLLALATAWLTLSALLTPVSSQAYHFSNGWMPGKRSSLPLTNLRQVSRQLSQTSSSPSSSDPRSDLS  
FCRTQPVFELIMTIIQAEMDRLQLLCSSETQDSTDDMETKKN SLLAWLKGKQNFYED\*

>GnRH-2

MRFVIALVAVMTALTSAGHAHFSTGWTPGF GIGKRMEGEP CNTKALES LQKLQAF TNVRFIILSSRI LNRDFRI  
MI\*

>7B2 [GenBank:KF515944]

MRTWAMTGLAGLMLVLLVANVRADYDYDYLVDLYKRLSQLDDYLAEDNEAYGGNSDWLDDRIPLDSRDGTTDIRD  
HEYLEHSASKGGFQYISGGAGEGNQHLTPEGTONNTHEVKSDEALPFYCHPPNCPKGFTEEDGCQLDVKDTAEDQ  
KKWISKMMASGQCSCDEEHMFCPKDRSTMNADKGHEGRDDLNDVLD SLLAGKMDNYPVGNKREKMVAKKGHPGN  
LNLGNPFLDGQVVHTVAKKGGVGSVMMK\*

>proenkephalin [GenBank:KC708483]

MKILVVFLLLOYHALAFASSEVEAVDKSEKESSEESTSAFAESSQVDMCD SNKDINAVCKICDVLNGPQKGNCCS  
DPDALLWCHLTVDEVMRTEGGQGEESAEDSGEGDHSEDESNEMDKRYGSLFSNWRWYSHRNDK SANANAEEAKR  
GVEKRYGNLLGGLFSNSNYGKDKRYGDLFSNSNYGKDKRYGGLFSNSHYGDKRYGGSLFGRLFSNKGKRYGNLLG  
HVFGRSVDKRDGQAEKRYGSLFTPMFGGKDKRYGSLFTPMFGGKDKRYGSLFTPMFGGKDKRYGSLFTPMFGGK  
DKRYGSLFTPMFGGKDKRYGSLFTPMFGGKDKRYGSLFTPMFGGKDKRYGSLFTPMFGGKDKRYGSLFTPMFGGK  
GHLGQLFSNKSQR\*

>DH44-1

MPSTPRGLLTLCLYLAIFTLTIATNDRPDSSSEDLDIHKRTRKLSVNTGLDALADSLRDRDSMEDVKHSQSOLF  
RLGKRPAPFSVNQDLSSLADAYGHGNAEESRARLLSLGKRVPLSVNSGLQSLADSMDSQNRLLALGKRPAPFSVNH  
GLDTLAEAMGMNGHNRLMSLGRVPLSINHGLQSLADSMADDDRQSRLOMLGKRGPLSINNELHSLADAYGNQDSP  
LLQLGKRGPLSVNAELHSLASSFAPGSHASLLNLGKRMPPSVNAELQSLAHSFKDGDSSQQLRLGKRAPLSVGA  
LQSLADSYDGGDSRSLSLGKRIPFSVNQDMQSLADSMNGRGESENSFLQSLGKRAPLSIGQEMQSLSDAHMSG  
YNPLNLGKRVAFSVNQELQTLGDAMRQDRLQLGKRSAKSHEANSRSKRVPGARRFAFNSLWLSLAEMARHSR  
SQQERKDVQDLLDNLGKRSV\*

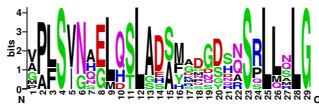

Peptide logo generated from the 8 different peptides of the DH44-1 pNP.

>DH44-2 [GenBank:KF515942]

MPTPLIQGLLSVCVLIATLSLALND SAEFESSEGLHKRAVKLSVNNGLSALANS MKDKELEDGIQTSHAQLFR  
MGKRPSFSFNQDLKSLADAHGMHSAENSRARLLNLGKRVMSVNGGLQSLADSMNEGPHGNLMLALGKRPAPFSVNH  
GLDTLAQAMGSDGSSQSLLSLGKRPAPFSVNHGLDTLAQAMGSESSQSLLSLGKRPAPFSVNHGLDTLAQAMG  
EGSSQSLLSLGKRPAPFSVNHGLDTLAQAMGSESSQSLLSLGKRPAPFSVNHGLDTLAQAMGSESSQSLL  
SLGKRMQLSFNQGLQSLADSMNDGGRSRLMNLGKRGQLSINNELQSLAHSFKPNGDSHMSLLNLGKRAPLSVNAE  
LHSLAHSFRPNSQASLLDLGKRAPLSINAEHLAHSFNGDGEGRARLLNLGKRVPLSINAEQSLAHSYQPN SQM  
RLMSLAKRVPLSVNQGLVSLASSMRGDRAEASRNFLQSLGKRAPLSIGQEMQSLSDAYNSHGNPLNLGKRMA  
VNHLERTLGDAMRHQAAPSLSLGKRFDNQNDHEHVRIMKRSPGARRLSINSELWLSLAQMARDARSHEDRKNQA  
LLDHLGKRSV\*

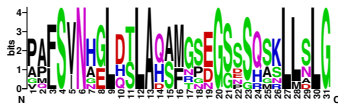

Peptide logo generated from the 8 different peptides of the DH44-2 pNP.

>achatin [GenBank:KF515943]

(...)STLFPYTTLFRSGKLTIVQVVSFALLLVVIANDENLLDSRELEENEIYDEIRDFGNKRGFGRGFGDKRGFGRGFGD  
DKRGFGRGFGDKRSAEAEIYNDKVL EEGIKERINAMFDSLPAAYKRGFGRGFGDKRGFGRGFGDKRGFGRGFGD  
RGHEEAFNSQELNDYLENLNNQLKFRMFAHHVFDKRGFGRGFGDKRGFGRGFGDKRGFGRGFGD\*

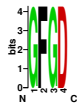

Peptide logo generated from several identical peptides of the achatin pNP.

>lugin [GenBank:KF515941]

MLCKYLAVATILAVLAPQLAQS WRPQGRFGKR TLDSNSLSEVfyGNKGLDADYGDLLSSEDMPNAF RHNNLVCLR  
KSQSGLYKC IRLRGAQDVPLDLHTA\*

>tachykinin-1

MTSTIVLTGLLSLIGHVTWAKLVLNDVYDQEDNNDLFEYEDFANSQKR SDDNLIIEEDRVDTYPF KRMDSNQFFH  
MRGRNGGESLTVDQDPETLLKLARYFRYLQAKR SLRNSNPVSLSAKR QPKGFHAVRGKRSFHH\*

>tachykinin-2

MTSAMLTVGLLSLIGHLSWAKIVIPDVYDQDNDLFEFEDFANTQOKRR DTLIEDPEDEQVDSYPF KRMDSNQF  
FHMGRNGQSEVMVDEQDPEALLKLARYFRYLQAKR SLRNDSPSGLSAKR QPQGFHAVRGKRSVLH\*

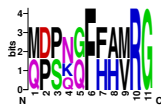

Peptide logo generated from four peptides of the tachykinin-1 and tachykinin-2 pNPs.

>calcitonin

MNWRVSALICVIYVSVCI AENYEDEKIEETALRMIEQMAETRGLSALKQVIDSIDGDLQKTHVE KRKVKDLTTK  
RKGLEVLKR ILKEMDSLIMEQKRT CQVNLGGHCATESAASVADQWHYLN SPLSPGRKR DTSLYQKLVGGKLLQ\*

>DH31

MQATLATVVVLCSSMLLLSHITSSHAMPALRORRAADSDTLALLEELVDELRADNVIO KR RIDAGYGSRYAAGA  
SVGSKLRALKQAADWNGPGKR RRNAEEFDEE\*

>pedal-peptide-1 mRNA1 [GenBank:JF811329]

MVLWKLPLLATVLLVNA APEKSHMKR SIVDDDDENSIYAGK GQSARQLDSLGGAEIPLYGR QLDLSLGGAEIPLY  
GRQLDSLGGAEIPLYGR QLDLSLGGAQIPLYGR QLDTLGGGQIPAED KR AFDSIGHHSFAFGGLKRAFDSIGHHSFAFG  
GLKR SFDSIGHSSNFAGLDKR PFDSIGHSSSFAGLKR PFDSIGHSSSFAGLKR AFDSIGHHSFAFGSLKRKR SAEK  
RSFDSIGHSSNFAGLDKR SFDSIGHSSNFAGLDKR SFDSIGHSSNFAGLDKR PFDSIGQSSNFAGLDKR SFDSIGH  
SSNFAGLDKR SFDSIGHSSNFAGLDKR PFDSIGQSSNFAGLDKR SFDSIGHSSNFAGLDKR AFDSIGHSSNFAGLD  
KRSFDSIGHSSNFAGLDKR SFDSIGHSSNFAGLDKR SFDSIGHSSNFAGLDKR PFDSIGHSSNFAGLDKR SFNSIG  
HASNFAGLKR SEQVNPEEEDKN\*

>pedal-peptide-1 mRNA2

MVLWKLPLLATVLLVNA APEKSHMKR SIVDDDDENSIYAGK GQSARQLDSLGGAEIPLYGR QLDLSLGGAEIPLY  
GRQLDSLGGAEIPLYGR QLDLSLGGAQIPLYGR QLDTLGGGQIPAED KR AFDSIGHHSFAFGGLKRAFDSIGHHSFAFG  
GLKR SFDSIGHSSNFAGLDKR PFDSIGHSSSFAGLKR PFDSIGHSSSFAGLKR AFDSIGHHSFAFGSLKRKR SAEK  
RSFDSIGHSSNFAGLDKR SFDSIGHSSNFAGLDKR SFDSIGHSSNFAGLDKR PFDSIGQSSNFAGLDKR SFDSIGH  
SSNFAGLDKR SFDSIGHSSNFAGLDKR PFDSIGQSSNFAGLDKR SFDSIGHSSNFAGLDKR AFDSIGHSSNFAGLD  
KR PFDSIGQSSNFAGLDKR SFDSIGHSSNFAGLDKR AFDSIGHSSNFAGLDKR AFDSIGHSSNFAGLDKR AFDSIG  
HSSNFAGLDKR AFDSIGHSSNFAGLDKR AFDSIGHSSNFAGLDKR SFDSIGHSSNFAGLDKR SFDSIGHSSNFAGL  
D\*

>pedal-peptide-2 [GenBank:KF515945]

MIRSDVTLAFLVCLAVRSFA AREKLEEQQFMIGSEAEDGLHKR MLDQVGSLLKRR MSPQEDYLMKSQGGKRLD  
EVGSSLLKRR MLDEVGSSLLKRR MLDEVGSSLLKRR MLDEVGSSLLKRR MLDEVGSSLLKRR VVDPIGSALKRML  
DEVGSSLLKRR YLDRLGSSLLKRR DAEMMEEGDRVAYAANNPKR SYSREEVEELLGKEYAENNVHYPR OLDETAEG  
LIG\*

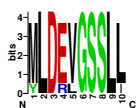

Peptide logo generated from 7 peptides of the pedal peptides from the pedal peptide-2 pNP peptide pNP.

>pedal-peptide-related

MKPIITSMVLVLLSLMAFAGAMYNPNPFTWAMHRFYQYRGISNQDRYNQDRHGNSDNSYGNSSGSYGSRFQERYVLQGY  
YYQQQSMGRRHQEQCRFEQCWDEFFMRRWGQVGTGESSQNGGQSNQNGFQNYEQCSEGVSRLRQLQQQLNNGGCG  
CEYRDMWAVRTARDSGMATYAFCDDFYNEYTEROCDDQYRRCVQTIQRLSFAENRYRDLRDEVSFACQINK  
YRSQPQPPSGCGNFNWFYMEQDMKVWMAEINGCPVYDIVKRCMNPMEYEFACSNQKDRVMTEYDQCIQKFNQD  
GRCSPMREARKAMHQFMKFMLEQHCQSDRQVRERFOQCCHEEDKKGFMSSSSNNDNRRNGHQNSNGYEEKKEK  
KTEEKKEVKKEEKEEKEEKKFTMNGNGHEGNYEEKKDVEKKRNGNQHDQDKNQYDSNRNNQNGFDKKNYKQNGFDK  
KDFNNGQNGFDKDYNNQNGFDKHYNQNGQSNNTNNHNDGNRSDYEDKSYNNNFDKNSNDNQSSNFKSEKESY  
NQQEDRKTGGRHGKNNKFSERGNNYDSYKPOEGEGRLAYLAVIKSWRDSQS\*

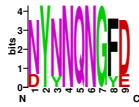

Peptide logo generated from 6 peptides of the pedal-peptide-related pNP.

>allatotropin [GenBank:KF515935]

MKVVLCLFVVVVFVSVNCGMDLRAPRAKRGFRTGAYDRFSHGFGKRGELTNEDDGLMSVEDMAELITNTPKLALSFV  
KRYMDRNDGVISKEELLFVPEQ\*

>sCAP

MKSWMKLSVCVLFVIVLLHTVTSLPPDFRNGRAGDLPGAKRTTGVMVEEAACRYCGMYNPTLGFSCRSDIGDSR  
RICLGDFATQLNSALEKHNLK\*

>sulfakinin-1

(...)DLTPAEVAKROGAWMDYGWGGGRFGKRAPLGRYDMYGIGGRFGKDVSRQAQAARQADLQ\*

>sulfakinin-2

MNLNLALSCMIAVMWLFRCRCKAAPGLITGIHRNLGNPHIRGYAVEGLVKDLMEDLVGEDEDNLRSLKROQLDDY  
GHMRFGRKSNNDDEEYGHFRFGKRNIE (...)

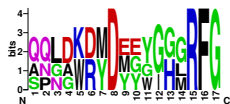

Peptide logo generated from four peptides from the sulfakinin-1 and sulfakinin-2 pNP.

>CCAP

MNQSTCLSVVLTFTILSVCLYQSSASRDSLTSQTFHQQRKIFCNFFGCGSKRSSLVPGGQETHDPRLTELLQEA  
KRSALYQDDLPLVARSGSSNSIYDDIFDDDTKMAARSSLSDFSSESVDPEALLKASLLSLLRSQIRRHSQLKG  
SK\*

>allatostatin-A-1

(...)KTKNCLSEFCGKGSNDNLMSDSFTFPRFKSGEDGSIKLSQLPNVTINDLTNISKYLGLRKMIDYGLKFHGN  
GRQTDNTLKFYGPGRINEILGYSGSGKRTDNGFKLPRRPNNIFKFSGLVKRTDRARSGIKMRLSGKRVDDISKFS  
GLGKRDNIFFSELGRVNNALKFSGLGRIDDGLRSSGSEKRTNDALEFSGLGKRGNDALQFSGLGKRGNDAA\*

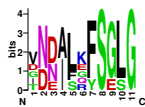

Peptide logo generated from 6 peptides of the allatostatin-A-1 pNP.

>allatostatin-A-2

(...)RKANNALKFSGLGRNDALKFSGLGRANDALKFSGLGREIDTLKFSELGKRNDALKFSGLGKRTNDALEFP  
GSVKRADDHLIFSRLEKEDDTLNFSGQKRETEVGLRFSGLGKRNDDIMNFSGLGKRADDSLGERVNDVEQFSGLE  
KRVNDVMTFSGLGKRMDETLKFSVGRKADDVLAFANELKRVNDNILKFSRIGQREDGGFRFSELEEKPDILRAGE  
KNLFRLLKKSNDGLKFSGLGKSHASKDSRMGKSTDGIMELPGLVKRANEIFRLSGLGKRIGNGLIFTGPERHIEEK  
GTDNSILHRGEKYNLNLSEFAKYPQCTKSIINNSFLSKFRKGMIDNAILSVLSHRIDNGKTPAPSPKRRVNS  
MHKSGPGKEVNQNNVLTVSGDKFKDNDMMWIHPTEKINGYHHSRGISAVNQADLYEPNSKSIPSSLKVGPKHR  
KDRSVTLDPDWKNHNKTRIPPGRIFRESKNLLPHFTPSRLQEIREEGLNDGIPFKLQKQVSRNSKKSVRKSRRS  
LVDEISAITNGKRLGHAYHSYVRRLSVDPGISLIGLGR\*

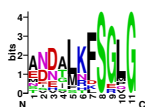

Peptide logo generated from 14 peptides of the allatostatin-A-2 pNP.





>prohormone-3 mRNA3

MKSSTFLAVFATLLATALGWSKYEDSFDELPARRSYCVNSGGKCFTSSECCKGYVCAAFDDLAFAGYCI LEKSLKP  
CAKVDVCAEDARCVSLGRKDERYCIQRADSPNDVIYRTAGPKAKLGOECTTNADCEKYGDGNELCCQKIRRFROK  
AKTICDRVNHMSACIPN\*

>myomodulin mRNA1

MTNCFALCLLVSCLCALSSAENDREKRAIRMLRMGKRGFGMLRLGRSAPYDQYESROLFDVPRMGKDLVDIMEPSK  
RHPPIPRVGNLDKVIDEYRRMVADEATSFDELPRFGRFVRSAAEVANEVEGSHKEKREVS GGVL PRLGLRDVENEI  
RAAPL PRLGYRAIPRPRVGYRDLETLPRLGLRELEYQRAAPLPRLGLRENFADEDDKEERAVPLPRLGLRDLDKKA  
VSMLRMGRSEETDTEHEMDKRAMSMLRMGKRGMSMLRMGKREEEIEPEVDEKRAMGMLRMGRAMSMLRMGKDAIE  
QYKRKMSMLRMGKRGMSMLRMGKRDDDEQQEFTTEEGKRKMNMLRMGKRAMSMLRMGKRDLDEYREQKRAMGMLRMGK  
REFNDSPEKRAMGMLRMGKR DSEDELOEKRAMGMLRMGKREYENLDEKRAMGML\*

>myomodulin mRNA2 [GenBank:submitted]

MTNCFALCLLVSCLCALSSAENDREKRAIRMLRMGKRGFGMLRLGRSAPYDQYESROLFDVPRMGKDLVDIMEPSK  
RHPPIPRVGNLDKVIDEYRRMVADEATSFDELPRFGRFVRSAAEVANEVEGSHKEKREVS GGVL PRLGLRDVENEI  
RAAPL PRLGYRAIPRPRVGYRDLETLPRLGLRELEYQRAAPLPRLGLRENFADEDDKEERAVPLPRLGLRDLDKKA  
K\*

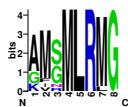

Peptide logo generated from 14 different peptides from the myomodulin pNP.

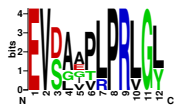

Peptide logo generated from 6 different peptide motifs from the myomodulin pNP.

>whitnin-1 [GenBank:KF515926]

MESKIIMSLAVVLAALCLGASAMSLPSEVVKHNQVSESGLDEKERATWLDTRDLGDLEDQFKELVYLAVKELQNE  
GRISPGVVSEKRTQQKRGRFQGF CFRRTRSGRFLPYICWKGNSRQAKI\*

>whitnin-2

MESKTIIVMSLAVTLAALCLGASAMSLPSDDVKHNQVSEALDQKERATWLDTRDLEDQFKELVYLAIKELENEGRRL  
TTGIVAEDEPRQKRGRFQGF CFRRTRSGRFLPYICWKGNSRK\*

### Platyneis pNPs belonging to lophotrochozoan pNPs families:

>FLamide [GenBank:JF811325]

MSTPVEPCMLLALFVLLATGSSHSAQSANVGSVASCDQERLTLCKACGTPDLLDKCCLDDTTYLICLKEVSKADA  
PYWEGELQDDDFEEDEKRAKYFLGKRAKYFLGKRPRNNFLGKR DSSLDFEDQYEGYDKRSPSPFLGKRGRSPFLGK  
RAKYFLGKRENEYDSAPMSDNYFEEDKRAKYFLGKRAKYFLGKRASWEELLKRAKYFLGKRSEDKRKYFLGKR  
VDAVQQEQEQENSQ\*

>FVamide/EFLGamide [GenBank:JF811327]

MHMSVGGWPLLLLLIIAHGSSLQAQDADSENMRQLQSMMLLEDALSANENSLGGQNAAPGYIGDDKRAAHRFVGRD  
SEKRRFLVGRKREDDDEEKRAHMFVGRKREDDKRAHRFVGRKEEERKRRFLVGRKDDDKRNRMFVGRKSDFDNDNFY  
DEKRRYFIGKRDGISRDIRRLWIGKRGDGYDKRPHNFVGRKGRHMFVGRKDDFDLAEDKRRMFVGRKMYDDEDYD  
DKRARMFIGKRAHMFVGRKYMDDLDEESKRRMFVGRKRRMFVGRKRDDELQDALSLDKRQLYIGKFAVEPAEE  
TRDLEEGEEKRNRMFVGRKSAEVROPADASVSSQ\*SDASLRAQ\*AIPVIPEIPGDYKHFANYVAKRFSEFVGGKR  
FSEFLGGKRRFSEFLGGKRRSAEFLGGKRRSEEEYPLEEIPDKRFSEFLGGKRRFSEFLGGKRRSAEFLGGKRRFSE  
FLGGKRRFSEFLGGKRRSSGIFDSVPRSERSVDAILKRDFFLGGR\*

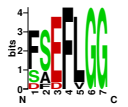

Peptide logo generated from 10 different peptide motifs from the EFLGamide containing stretch of the FVamide/EFLGamide pNP.

>NKY-1 [GenBank:KF515927]

MKQFILLVLSVSAIYITLVCVEDSFSDWLQRGHVARRSAPESRFLFGGPKSKRDSNYAIKMLMEELLNELNESEERH  
KETQMNQMNLLKEMSKRAFQWQPMGGPLPVETRLASFGSRIEPRTEPGSGPNGIKAMRYGR\*

>NKY-2

MNAIYSAALVLTYSITILGASLHSQQFAVAQPNDSENYDFAAKASSQNSYNWMMRYLLSNAKHIVPDTDQKRFDT  
FAMPYLKYKVSPVDKRNNGIWIWMPAQGYVSVPHQOEGGADEGKPGKIMRYGK

>FVRIamide mRNA 1 [GenBank:FJ358432]  
 MKGAPYVIPLTLVAVTSLWLCACVAANFHENDAEQQAEEIAELENDPYPKRVVSGFVFRIGRDPSSKASSFVFRIGR  
 SSSFVFRIGRNPWGDKRVSFVFRIGKSNDDVPAYLPYDDALVEDQEKRRARSGFVFRIGKSVGDEEKASSFVFRIGKS  
 VDEPNYIEDFGHEYEESPEKRASAFVFRIGRPSFVFRIGRDPYKASSFVFRIGKRASDSSEMEDSKASSFVFRIGK  
 SVDEEKRNHFVFRIGKSEEDLDKRVSSVFRIGKSLSDDEKRARESFVFRIGKALEDEEEKRGIREGFVFRIGKAKSGF  
 VRIGKAKSGFVFRIGKSMDDKASSFVFRIGKDVGDDEKASSFVFRIGNPLGKRPSSGGFVFRIGKNYEGDEVLEEA  
 KRPSSGFVFRIGKSMDIVQEDGLAEPVDEAQKRASNFVFRIGKRASDSMSDMTEEH\*

>FVRIamide mRNA 2  
 MKGAPYVIPLTLVAVTSLWLCACVAANFHEVCSHFCDSYNKVTSKESCVLVCENFIIKHLQNDAEQQAEEIAELEN  
 DPYPKRRVSGFVFRIGRDPSSKASSFVFRIGRGSFVFRIGRNPWGDKRVSFVFRIGKSNDDVPAYLPYDDALVEDQ  
 EKRARSGFVFRIGKSVGDEEKASSFVFRIGKSVDEPNYIEDFGHEYEESPEKRASAFVFRIGRPSFVFRIGRDPYK  
 ASSFVFRIGKRASDSSEMEDSKASSFVFRIGKSVDEEKRNHFVFRIGKSEEDLDKRVSSVFRIGKSLSDDEKRARE  
 SFVFRIGKALEDEEEKRGIREGFVFRIGKAKSGFVFRIGKAKSGFVFRIGKSMDDKASSFVFRIGKDVGDDEKASSFV  
 RIGNPLGKRPSSGGFVFRIGKNYEGDEVLEEAKRPSSGFVFRIGKSMDIVQEDGLAEPVDEAQKRASNFVFRIGKRAS  
 DSMSDMTEEH\*

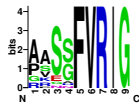

Peptide logo generated from 20 different peptide motifs from the FVRIamide pNPs.

>GNXQN [GenBank:KF515928]  
 MRVLLLAGLLLCVYSAPLQOHSKRLSRAKAAEQVIFGNHQNNARVKGSGPLATPLEPLGQPVKGDEQAIDKKA  
 LVTSKVTSSQEDVQVPAEVEGQEDLSDLETDTKGHLAEEDADKLAPLAEDSDASSQDATAADMKDEETEAGSSSQ  
 EDATEOSLEQLLNENEKIPSAQQQGFPLDLFGKNQQQGEYMDYPTYDYQYNPYLRRKRSLTPHKARAVNAEDMM  
 QGSAGIANSGRRSKRDLDGQERYMWNLDYPEVERRGYEEEEGPPELDEEQEALKEMLRDEILKYNPEMAEEDVNEI  
 GEEERYEPEQEAQDLALINLYRNGYAEAPEQPDYEEQGPPEWEDMGPAAEVALPEEEEEPYFNPYGOYASEDNVM  
 SAPYSLAKRQYLSFVPGMRKRGNDFYPSYSGPDARWNAMVTEDEVTEKRAEERMYERLLLRLAALALRDRLDELEAQR  
 YAEDFPEKK\*

>LXX  
 MKELTCLLVVATIQLALSAAAPSQNKVVRMKRNYEQPYDLQFHQPDETALVRIKRQRSSAMEPTLVRVCRDEQEL  
 KRYKREKRDVEEELQVRVQRKRDTEELHRFKRQRDTEAELEEKRRHSGEVEDPELARTKRFKREAEPLQRYK  
 REKRDAAEAEIHRFKRQRDTEQELERYKRDLEPELSRTKREKRVESSTLAKEKGLKEKRSRAAGRRRNQ  
 KALKREKRTNMNHRWEKHQRNNGNKHHSRPMKKNVLRKERSDLLANHALRNHLVLSQRNKLGSKLAKHRVKRQ  
 KIHQGHYHNKLEADVAKLGRRLRDIALNLHKANLKNAAKRRVVKRTHAKNKKIAAKKH\*

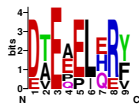

Peptide logo generated from 6 different peptide motifs from the LXX peptide pNP.

>CLCCY [GenBank:KF515938]  
 MSSIIYKMLLVLCALLIALASSRPSATNQEEVDQANVARLKRRTKCGFQLEACDPYENSPPGMKCANLFGGYC  
 LSGIEKMLPQTSYGV\*

>CCWamide [GenBank:KF515929]  
 MRWIIFCFLIVLFSHTVLCWRIQDFANTDNEADDDTTSARYRQERLLDYLNDVKRRHVKDRQVQKPPYFLTCSAW  
 QEPKDPWTNNVHTQCCDEGLVCKCNFWAQNCKKCVSRLWGR\*

>QSGamide [GenBank:KF515940]  
 MPNSQVLIATVIFCVAVSCVCSKSIQVFNHRNERLKRQIGDLQIAHQAIQGLKHWPKGCVVEIGCGLFDIAASGKR  
 KRSSYSNNVEDEFLNNEELRRESNRLVLLQRIADELMRES\*

>CCRFamide  
 MQVKIIQLTTYSLIIALVQWEVIKALPTFPDMSACQAFCKANFQGEQHIACLTDICRSMYRGRISRFGKRVSHVME  
 DDLQEPLEPTALKDRLYAAVMKVQLQHDQDRGSKRLPGEQQEKRSWPFALSLD\*

>HFAamide  
 MTRDVTAVTLALSIVLVALLLTVQETNSFEYNGYCKMCRWRRGGNLCKCNAVHFAGKRTSATPPPVDVLDLDDV  
 TNEVSSRAAEQLRWFTFAALAVQSSKDGQAQENSASEDLRAKQLLLMALKLLSDNSQGNPNWSDITEDRLFD  
 NI\*



## Platynereis pNPs belonging to annelid pNPs families:

>FVMamide\_mRNA1

MSLLWVHVAASFVAVVLA<sup>YSDD</sup>KRFRKPEYQDFVLGKR<sup>DRPSYIDFLMGS</sup>KRSRR<sup>IYPEFVDFLLGSS</sup>KR<sup>PSY</sup>  
SDFVLGKR<sup>SRPSFNDFYMG</sup>RR<sup>AERPSFSEFFMG</sup>KKR<sup>NDAFHDYFMG</sup>KR<sup>DAPNYLDFMTLDDQHV</sup>RKR<sup>SANEEQTS</sup>  
ESHNEANDA<sup>AVD</sup>KK<sup>DNDY</sup>GK<sup>FVMG</sup>KK<sup>NSQQDFQAFSLG</sup>KR<sup>QEEKQNYDSFVMG</sup>KK<sup>KKDKDY</sup>SK<sup>FVMG</sup>KK<sup>SKDKYSN</sup>  
FVMGKR<sup>NGDDYSKFVMG</sup>KK<sup>DNKDYSNFVMG</sup>KK<sup>NAKDYSNFVMG</sup>KK<sup>DGQDY</sup>SK<sup>FVMG</sup>KK<sup>NDGDYSKFVMG</sup>KK<sup>NDGDY</sup>  
SK<sup>FVMG</sup>KK<sup>NDDYSKFVMG</sup>KK<sup>NDDYSKFVMG</sup>KK<sup>NDKDYSNFVMG</sup>KK<sup>NDG</sup>(...)

>FVMamide\_mRNA2 [GenBank:JF811328]

(...)<sup>NADDYSKFVMG</sup>KK<sup>NADDYSKFVMG</sup>KK<sup>NDGDYSKFVMG</sup>KK<sup>NNGDYSKFVMG</sup>KK<sup>NVDDYSKFVMG</sup>KK<sup>NDGDYSKF</sup>  
VMG<sup>KK</sup><sup>NADDYSKFVMG</sup>KK<sup>NANEYSKFVMG</sup>KK<sup>NDGDYSKFVMG</sup>KK<sup>DDNDYSNFVMG</sup>KK<sup>NDGDYSNFVMG</sup>KK<sup>NDGDYS</sup>  
K<sup>FVMG</sup>KK<sup>NDKDYSNFVMG</sup>KK<sup>NGEDYSKFVMG</sup>KK<sup>NDGDYSKFVMG</sup>KK<sup>NDGDYSKFVMG</sup>KR<sup>S</sup>I<sup>PEYDAFVMG</sup>KK<sup>NPKD</sup>  
L<sup>DSFYMG</sup>KK<sup>EQKPDYQSFLLG</sup>KK<sup>SHGPQNYENFVME</sup>KK<sup>NGEDYSHFVMG</sup>KK<sup>KNYQDFVMG</sup>KR<sup>GSADYQDFVFGKA</sup>  
S<sup>PNYQDFVLG</sup>KR<sup>SPNYQDFVLG</sup>KR<sup>RNSQNYQDFVLG</sup>KR<sup>AAGNYQDFVMG</sup>KR<sup>GAPQYQDFVMG</sup>KR<sup>GAPHYQDFVLG</sup>KR<sup>ASP</sup>  
N<sup>YQDFVLG</sup>KK<sup>KASANYQDFVLG</sup>KK<sup>AEPNYQDFVLG</sup>KK<sup>SEGTO</sup>\*

>DLamide [GenBank:JF811324]

MAAGROCLLTALVIFCACSOLTHALNENSVPLEKEDLLLTGDDE<sup>KRYAFNADLG</sup>KRSQLEELYEDEDADD<sup>KR</sup>SYGF  
RSDLG<sup>KRRMGFNADLG</sup>KR<sup>FAAFNTDLG</sup>KR<sup>YGFNNDLG</sup>KR<sup>YGFNNDLG</sup>KR<sup>YSGFRADLG</sup>KR<sup>YMGFNADLG</sup>KR<sup>FSS</sup>  
FRADLG<sup>KRLRDLDESH</sup>KR<sup>YSSFRADLG</sup>KR<sup>SVPSDDL</sup>KR<sup>FMFRQDLG</sup>KR<sup>YSSFRADLG</sup>KR<sup>AMFRGDLG</sup>KR<sup>FSDSSD</sup>  
DA\*

>SLRFamide

MLSVSRWLQVLVVCVLGVVCTCALPSLAGYPDDGLHYRDEEDSFASSDPDKPV<sup>DDGNLGSLLL</sup>KNLRFRDLNE  
YHRLRPALLKSLALKPHYQEAQETKEFN<sup>KR</sup>G<sup>DMSVNELAQILNHLKARNVDGGVKLQSLRFG</sup>RRRR

>QERAS [GenBank:KF515937]

MEKIAVFLLVATIALAFSASINQADALYLPTNRVM<sup>KR</sup>SAAAAAANNHVKISSPRO<sup>KR</sup>YTDYQERASAF<sup>C</sup>TGL<sup>C</sup>MYE  
ERKSYSE<sup>C</sup>FDL<sup>C</sup>NYYW\*

>MNC

MRSFLLVILALVLSALLVSS<sup>S</sup>DDFSSQYSQWQLESEQPKQTEPDISDFARDV<sup>KR</sup>LLLLHL<sup>RRR</sup>K<sup>Q</sup>PNSASPSSRS  
AS<sup>KR</sup>F<sup>Q</sup>L<sup>Q</sup>R<sup>I</sup>N<sup>KR</sup>H<sup>C</sup>WDVADV<sup>CC</sup>MWNV<sup>C</sup>\*

>LEQ [GenBank:KF515939]

MWIPLAAAVLFATVVSNI<sup>G</sup>APLNPLPQKI<sup>R</sup>ESTKEILGLEQEL<sup>KR</sup>KAAGEN<sup>KR</sup>PRPPAEEGPVPAEALADEELVKE  
LAAHDEAVKDDKPGQSKETDEDSTEELQOEKAVA<sup>KAAELKAKQEEQEDL</sup>KDVEKEPESEPDVAQEEEEAQDQEE  
PGNEEVHDEEELQNLQAPSNINDLYEDYLNQ<sup>RQAYDA</sup>KR<sup>SYGAALDNLAEQENENKDEFVSSLLETIREHPELL</sup>  
DEMRTGEVEEEEEQPPSYNPNPSNDQEEALRAEYLAATRGLQEPQQQ<sup>FESYASNPPYQGS</sup>SPYEENEIRPPMENFQ  
NYP<sup>SDKMAKVVA</sup>KK<sup>WGYSAPPEYYQ</sup>QEE<sup>NQAPLMEESAQE</sup>KK<sup>DHHEESLDQPQHLEPIM</sup>\*

## Platynereis specific pNPs:

>WLD [GenBank:JF811332]

MTSSGVLATLILGYLTNAVLTQEVVFPVQORNLLRDHNTAQQTN<sup>CHK</sup>C<sup>S</sup>LEGA<sup>AKLK</sup>C<sup>V</sup>ARAC<sup>G</sup>F<sup>G</sup>GAILN<sup>KR</sup>WLD  
NSQFIED<sup>KR</sup>SHKVTRIA<sup>PWS</sup>KK<sup>ARANHT</sup>RELLASRIGDLKNA<sup>KR</sup>WLDNSHF<sup>NED</sup>KK<sup>WLD</sup>SMQF<sup>NED</sup>KK<sup>WLD</sup>HSQF<sup>K</sup>  
DED<sup>KK</sup>WLDNSQF<sup>RDE</sup>KK<sup>WLD</sup>NSHF<sup>NED</sup>KK<sup>WLD</sup>NSHF<sup>NED</sup>KK<sup>WLD</sup>NSQF<sup>KDED</sup>KK<sup>WLD</sup>NSQF<sup>FRED</sup>KK<sup>WLD</sup>NSQF<sup>KDD</sup>  
DKK<sup>WLD</sup>HSQF<sup>KDED</sup>KK<sup>WLD</sup>HSQF<sup>KDED</sup>KK<sup>WLD</sup>HSQF<sup>FRED</sup>KK<sup>WLD</sup>NSQF<sup>KDED</sup>KK<sup>WLD</sup>NSHF<sup>NED</sup>KK<sup>WLD</sup>NSQF<sup>FRED</sup>  
KK<sup>WLD</sup>NSQF<sup>KDED</sup>KK<sup>WID</sup>ASQF<sup>ADD</sup>KR<sup>WVDMHFNDE</sup>KR<sup>SAQGLDSAEDMEESM</sup>KK<sup>WV</sup>D<sup>PLNYGLD</sup>RR<sup>K</sup>SAYAK  
LSM<sup>CFHQH</sup>C<sup>A</sup>H<sup>LAKMNYQN</sup>C<sup>V</sup>Q<sup>ARC</sup>MPLITSGETEGEATKA\*

>SPY [GenBank:JF811331]

MGPRKMPCTSVVQLLFAFVVLCLISAAP<sup>E</sup>QSDVENAAEQDVPD<sup>NAEN</sup>KR<sup>SSMESD</sup>KK<sup>AV</sup>KK<sup>DVNP</sup>SDELIGTK  
QD<sup>KR</sup>SP<sup>IARLMKSNDD</sup>KR<sup>SPYAGFMGP</sup>NKR<sup>SPYAKFMGSSED</sup>KR<sup>SPYASFMGSNDEE</sup>KR<sup>SP</sup>IAKLMG<sup>SND</sup>KR<sup>SPY</sup>  
AK<sup>FMGSSED</sup>KR<sup>SPYAKFMTDE</sup>R<sup>SPYANFMGSNDDEE</sup>KK<sup>SP</sup>IAKLMG<sup>SKDD</sup>KR<sup>LAYAVHPAAFHKFRAG</sup>KR<sup>SPYAS</sup>  
FMGS<sup>NDEE</sup>KR<sup>SP</sup>IAKLMG<sup>SDD</sup>KK<sup>LAYAVHPAAFHKFRAG</sup>KR<sup>SPYASFMGSNEE</sup>KR<sup>SPYANFMSSDD</sup>KR<sup>SPYAG</sup>  
FLANS<sup>ED</sup>KR<sup>SPYAGFMTGD</sup>KR<sup>SPYAKFMTGDEE</sup>KR<sup>SPYAKFMGSSED</sup>KR<sup>SPYAKFMGSNEE</sup>KR<sup>SPYAQFMGSNEE</sup>  
KR<sup>SPYAKFMGSSED</sup>KR<sup>SPYANFMAGD</sup>KR<sup>SPYAKFLNED</sup>KR<sup>SPY</sup>GAYMG<sup>MSSDD</sup>KR<sup>SPYAKYMNEND</sup>KR<sup>SPGFRTM</sup>  
RLG<sup>SNP</sup><sup>SIYDVQRDDTAN</sup>AR<sup>GLRGP</sup>SMEQLSDNGLVQ<sup>TIDGLKETDKLSD</sup>KR<sup>IP</sup>TDEDVLL<sup>K</sup>SQEDP<sup>INLPPAM</sup>  
MQALLKPGENEV<sup>KK</sup>DEQNHGRQ<sup>KR</sup>SALVYDED<sup>KR</sup>TPYAGFREIMARN<sup>REL</sup>PVSR<sup>LNPAPGF</sup>KR<sup>TFETLNDISDRMG</sup>  
SDGMLWSDSYSIPR<sup>F</sup>TGSF<sup>RRR</sup>STDEVHRE<sup>KR</sup>SPGFRSMKPNW<sup>PDFDMD</sup>KR<sup>SPGFR</sup>FMK<sup>WQSGQDDED</sup>MGA<sup>KR</sup>S  
PGFRHMLRDNGSNSRYRNSYFLDALANELEED<sup>KR</sup>GAGFRSM<sup>RIQPDNFEELSDDMIDNDIT</sup>KR<sup>YFGGSNRFLHP</sup>  
AAFHRQLAFSHRRYRG\*

>HIGA [GenBank:KF515947]

MIGILFFYCSLLVQLVFCASSQLADDAGSDVTKRHLGSAIRWVDANRGRPGLEKRLHGPALNVGYGGQFWFRDEPF  
RLSRYNSRNDMYKRLATSLSYLKGQIKNSDADDVVDDEQPSSEVNRKPHHAFNLNAGNSGRLPFWKDDRWSRRYKRD  
AEVSVEDAHKEEDNEVKDRSKRHIGAAMNLAQLKEAENKRHIGAAMRLRPSKFEDKRHLGAALNLVRQANKVDKRH  
LASAMKLVGRLRMPLSQIDSDVRDQMSSEMNDKRHIGADMRF AEATDNSDMDKRHLGAAMRLVQQPEDSDKMDKRH  
LGAAMRLVQPKENDAKRHLGAAMRLVKSNNNDNKDKRHLGAAMRLVGTKENDEKRHIGAAMNLIGLKDDNENKDKR  
HMGAAMNLVQTKDGDDEKRHIGAAMRLVQPKETNEMAKRHIGAAMNLAQADNENMDKRHLGAAMRLVQPKDDNMEKR  
HIGAAMNLVGLKEDNENMDKRHLGAAMRLVQTKDDDEKRHLGAAMRLVQPKSDGNMDKRHLGAAMRLVQPKQSEEK  
RHLGAAMNLVGLKQDNSQSMDKRHLAAAMRLVQAKGDDDKRHLGAAMRLVQPNDDREKRHIGSAMNLIGPKSDEM  
KRHLGAAMALLQPKSDDKRHMGAAMNWRNSKNFNDDDRFEKRHIGAAMNLVSPNNDNKDAEKRHIGAAMNWRNSKN  
FNDDDRFEKRHIGAAMNLVSSADDDENIDEEKRHMGAAMNWRNSKNFNNDNDEGFEEKRHIGAALNLVSPDDDNIDEE  
KRHMGAAMNWRNSKNFNDDDAFEKRHIGAAMALRPANIDDMGMNSMDKRHIGAAMALRPADSDDMAMDMGMGKRHI  
GAAMRLRAPSYSDRYSGAVESALVPLPAPPQAKEQKFTPIFTSTVNIYASTYTQNGSNYSRKKMGTPPPPSKGP  
FASKILPRVKKGGFWPPPTPRTRPNFFSPESVEIFFKKNKKNTPPPPPPPFFGGGALRGGPTPAFF\*

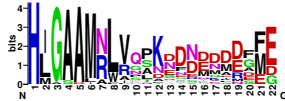

Peptide logo generated from 32 different peptide motifs from the HIGA peptide pNP.

>NGEW [GenBank:KF515948]

MISTGMLYTLFITLFAQSALCAEGVKKSEDSKRSAENYVEKDDDPARRYAGSQYDKKDSWKRFLKDAAKRGDEWKY  
VENQNRRQQEWKRFMDQNDLKRRLAEAGQETDNDKRKGVWSMVGDDHHSNGEWKRDDERDLESLENEKRKGVWQWVS  
DTHGGQWKAVDSEHPVGSKTDKRGKVSIVGDHHSNGEWKRNDVNETDKRGKVSIVGDQHSNGEWKRNEENS  
ETDKRGKVSIVGDHHSNGEWKRNDVIDETDKRGKVSIVGDHHSNGEWKRNDVSETDKRGKVSIVGDHHSNGEW  
KMNDVVDETDKRGKVSIVDNHHRNEDWKRNDPSQIDKRGKVVNMVQSEPEGEKRKAWQVSDTHGGQWKRKSV  
DKRTSTKALAN\*

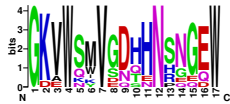

Peptide logo generated from 11 different peptide motifs from the NGEW peptide pNP.

>AYNPY [GenBank:KF515949]

MVSLRMAPVLWSALLVTLIGLTEVTGEEVSDASLLSDETEDDMEKRAGSRACRCLHDSDDWGSCLACFSRPGPA  
PYYGKRAVDPYAWDVEKRAVDPYDWDVKAAYNPYDWRFSAADLEKRAYNPYEFEKRAYNPYDWRFSDTDFEK  
RAYNPYDMEVKRGLSSRCCKMIRLTSCKNCSYAPYFTKRAYRTSYRPOFGENCACCRKDRFNYGCCLNACAGKR  
K\*

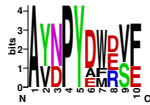

Peptide logo generated from 6 different peptide motifs from the AYNPY peptide pNP.

>YTL

MVEMRIIVLLAFLLPILQICAEVVHTKRFGGPILSSAYTGNYRYKHRNGEERIQRPGAPQPNKNDKRSSNDFDI  
DPYKRGLLGALEKIANSKRYTLGTSYGGSYNNDNSDGYPHKRYTLGTSYGGSYNNDNSGGYPHKRYTLGTSYGGSY  
NNDNSDGYPHKRYTLGTSYGGS (...)

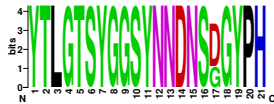

Peptide logo generated from 3 different peptide motifs from the YTL peptide pNP.

>PPLPamide [GenBank:KF515950]

MVYKTIIPLVVILLFGHIHSIPKRTLITLNDEDLREKKAEDAAAYPPFIPPLPGKAGAAASNNELALELALIDKK  
GKOPSKNEIALQDLNEDEVISVGKKAQPDVKEELVDRLLLEILKEDTVSGIKREPPPLPGKRETPPLPGKRETPPLP  
GKRETPPLPGKREPPPLPNKREPPPLPNKRETPPLPNKREPPPLPNKREDEVISVGKQVLDQDNEELVDRLLLEILKE  
DTVSGNKRREPPPLPNKRETPPLPNKREDEVISVGKKAQQDANNEQLVDRLLLEILKEDNVLGEFDTPPVIPLRPNKIE  
AIDKEVQDDNMELIDRLLKYLTKK\*

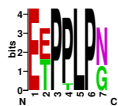

Peptide logo generated from 10 different peptide motifs from the PPLPamide pNP.

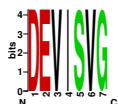

Peptide logo generated from 3 different peptide motifs from the PPLPamide pNP.

>PY [GenBank:KF515930]

MDLKTGLICSLSLVLLICTVCSDAFAIRRPENEELVRLARLDRALGEMISSPDDPHELSEPMKRKNEDGAVPYKRN  
EDGSTPYKRNEGSSRKLAVDGPVYKRFSDLESLDRVLRLLDMEERLHERNTEKRDDHIPPFPAPT\*

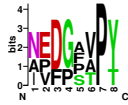

Peptide logo generated from 4 different peptide motifs from the PY peptide pNP.

>Qpeptin [GenBank:KF515931]

MGHFSTLLVLLATASVSFAFYIRDDDAALSEARRSDEERDELGAYDPFALFNKRDEDKEKRMAELFDRSISEAVRS  
LADFGYPEKRDAEAEFEFAEVAVAEAELEEVADAEQKRQVKKRYLDDFTDLLYMORRGVGEAEELADAVAAEAL  
VADAEQKRQVKKRYLDDFTDLFSMQRRGLGETEEELADAVAAEAELEEVADAEQKRQVKKRYLDDFTDLFSMQRRGL  
GEAEELADAVAGEAELEEVADAEQKRQVKKRYLDDFTDLFSMQRRGLGETEEELADAVAAEAELEEVADAEQKRQV  
LDGVTEFLGMQRKNAEENFTEDAERDLEDMKRYTHLLSSNQGYNRNNGNRLGYNHNRMGYNRKGFKRDFTEEQV  
EQMRELKDLFVDHVKRMTEDE\*

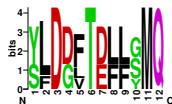

Peptide logo generated from 5 different peptide motifs from the Qpeptin pNP.

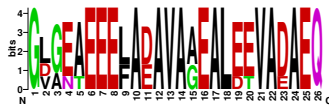

Peptide logo generated from 5 different peptide motifs from the Qpeptin pNP.

>THDamide

MNANQFIACLVAVFCLVAVAVAYPRAPAQWNQVADDDDAFLRSAKARGGPIAAPLWFLKTHDGKRGSPVAAPL  
WFLQTTGGKRDAEAVNEDSGLWMVGDKAVKAPGYRTKREAITDEDDMP\*

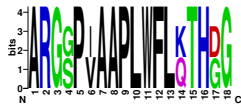

Peptide logo generated from 2 different peptides from the THDamide pNP.

>YYQamide

MNWKAVLLLSLFI LAVTVFVTDGSI PRGGGKIRSRFKARVWNKPGYRKPSDRKPDNEVSVPKSQKKKPVVTL  
EDELVYIE\*

>FGamide

MAATSRSLSIOLLSSCLLLTFSFESKSLTSAKQLGPOQSPWKRLPTNGGKMRNVNTDNQIPSGNALNSTIVEEK  
PVDMEIEVSKKFTVMRNNLANGFGGRHCLSIAIHCDLRFNATSVPVTPCSLLRYFQNCMEDETNLCLP  
LKTSLKSLMSGFRANGKCHQMPPLAFHEAWLNSGEGSAECCKPEATWACALQLVSDLKGLHDKTC  
DAILQFRNCIAMHTHTCGYKARLLVDGTQGLVWAYKKAFFCK\*

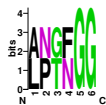

Peptide logo generated from the C-termini of two different peptides from the FGamide pNP.

>LPWamide

MKLQTLAILVIAAIATHS LPWGRDLGGVEKVALEEALDKALRNTDFEPQEEERRRRFPESFFNSYRDHYNALN\*

>GYamide [GenBank:submitted]

MDISACAFCAIFL FASLLHTGSARPLDEYLIDQEI GKLDQTDREMEMLEKLLYRLIPSEDGENLRNGEDLEDD  
SLQNYDKHLKDLHVSTRSHSSSPVRYSNVFGTRNNYEGSRMPLRIAGSKRNFDRNGWGGGYGK\*

>SLL-1

MSMLGLQVMILVAVAVVLA SAQGEPPNPMA PKIRTIRDVLFHFVRRNSVKSPNSASLLKRLAYDNKDSKRFIPGA  
FSSNCGSFGCNSQSFSGNGFGSQGFGS QGFPSSSYDDDEYYDDDEYYDDEYYDDE\*

>SLL-2

MLGLQVMILA AVAVVLA TGQGTGQPPNPMA PKIRTIRDVLFHFVRRNSVRSPPNSASLLKRLGYKKDSERFIPGS  
FGTNCGPLGCNNQLSQD SHGFGSRGFEDQGLDTSNDENDEYYDDEYDRDS\*

>SHM [GenBank:KF515933]

MKNCVVALALFVLI GLVCLTLA DETERDAAFHPKTYERSSEAI EVNSVEEYESHMKRGAKKCSRNSVCYGVCCGLF  
YQRCCKDGWRC TFEPSIRTYC APSHY\*

>RNT [GenBank:KF515934]

(...)GHS<sup>4</sup>LT<sup>3</sup>TM<sup>2</sup>KOAVNLV<sup>1</sup>VFL<sup>0</sup>ILPVSLA<sup>0</sup>AVTLLGQDDEPFYLPNEIATSSQOETANALHQALAHVYSQLATDNRDSD  
IEDS<sup>0</sup>K<sup>0</sup>IP<sup>0</sup>PGLRSTSM<sup>0</sup>E<sup>0</sup>K<sup>0</sup>R<sup>0</sup>D<sup>0</sup>R<sup>0</sup>C<sup>0</sup>Y<sup>0</sup>CDLDF<sup>0</sup>F<sup>0</sup>G<sup>0</sup>C<sup>0</sup>RRR<sup>0</sup>K<sup>0</sup>R<sup>0</sup>PD<sup>0</sup>IR<sup>0</sup>SLLAASMF<sup>0</sup>RNT<sup>0</sup>R<sup>0</sup>K<sup>0</sup>RR<sup>0</sup>DSQFTPNLHEISLNPALFD  
NTVMDSLHAKRSKLSI\*

>SPRamide

MMEKVFVFLIVVALAVLQPAAGGGLER<sup>0</sup>K<sup>0</sup>SS<sup>0</sup>TNDIFLDTTRGDESPRG<sup>0</sup>R<sup>0</sup>SK<sup>0</sup>SKERPRSSSPSKG<sup>0</sup>K<sup>0</sup>RSRSRSKSRN  
RDVDIPIVS (...)

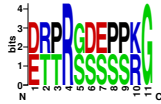

Peptide logo generated from the C-termini of two different peptides from the SPRamide pNP.

>QRIamide

MPSDHGNLSLLTRCLLLLTVISLATA<sup>0</sup>CP<sup>0</sup>CMHC<sup>0</sup>GPPMCRAVCA<sup>0</sup>AHDCYK<sup>0</sup>CC<sup>0</sup>CCVFFENRIG<sup>0</sup>K<sup>0</sup>RNSEIQSQPPKEDK  
QESLCLF<sup>0</sup>K<sup>0</sup>RQLQLASAKQKEEDENVIP<sup>0</sup>LDVSDIAEAMSVRLSILRASEDRLNP<sup>0</sup>DSSLADTSSPTGLDRFLAFLQQ  
AAKSRET\*

>QDNamide

(...)GS<sup>0</sup>TTMRSPGLILLGSAALAAG<sup>0</sup>QLHYTAHHRV<sup>0</sup>CCLDNG<sup>0</sup>KRR<sup>0</sup>GPEAIVLE<sup>0</sup>K<sup>0</sup>RFDPLTSFVISLNSLNYSRSDG<sup>0</sup>C  
IEYAGL<sup>0</sup>R<sup>0</sup>GNLRILEELEEWPNNDLHREQDHDIVFSSRPERNIDPGTAMN<sup>0</sup>CLEVRISQAEHI<sup>0</sup>K<sup>0</sup>RRLTRIPFFT  
HSDLKSMFPPKLDEKDTMMLLAGTVIRPDEEETVYFKITDSQVINGVELYPGSVQFLSAIDRARIVTAEFVMGFA  
KYKASSEEEEGGEEPDL<sup>0</sup>Q<sup>0</sup>R<sup>0</sup>VLDLTLRFLQYGTSRPIVSLKEADAFFANQLSDPTLREDIAELNIKAVLGQLNEDF  
SYISG<sup>0</sup>K<sup>0</sup>MLAVNFGQTEKPPTTGTLSKFAKRL (...)

>PCNamide

MFMLLGLLLLSFEVQESAG<sup>0</sup>LYVGP<sup>0</sup>SGDSK<sup>0</sup>GILQYLQ<sup>0</sup>QMILGR<sup>0</sup>KK<sup>0</sup>RDLTRNAESAPFC<sup>0</sup>IP<sup>0</sup>CNG<sup>0</sup>K\*

>CCAamide

MKTYVSHOREKFARHRML<sup>0</sup>SMLS<sup>0</sup>LVASLLKMSA<sup>0</sup>EPGGIDAKERERLETCAADSI<sup>0</sup>K<sup>0</sup>RDETEMIQQIELRF<sup>0</sup>CQLLCAG<sup>0</sup>K  
R<sup>0</sup>PKWTPGMRDVP<sup>0</sup>RWGESINDNSTARFRDEL<sup>0</sup>K<sup>0</sup>KFYDNIDQ<sup>0</sup>ISKEDEASEKSRLEA (...)
